# Supplementary material
Source: PubMed Central journal article supplement (PMC4047476)
Supplement: supp_M113.035170_mcp.M113.035170-12.pdf [file supp_M113.035170_mcp.M113.035170-12.pdf]

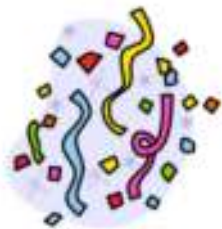

# confetti

*A multi-enzyme map of the HeLa Proteome*

## (<https://proteomics-int.swmed.edu/confetti/>) Single-Peptide Protein Identifications

Listed below are all protein groups identified with a single unique peptide sequence. For each group all peptide-spectrum matches are given. Annotated spectra our found below the table.

q-val - PSM q-value

P - iProphet Probability

| ID     | Indistinguishable (Sameset) Proteins                       | Peptide Spectrum Matches |         |   |       |       |
|--------|------------------------------------------------------------|--------------------------|---------|---|-------|-------|
|        |                                                            | Peptide                  | M/z     | z | q-val | P     |
| 426776 | F8W9Z9; Q674X7; Q674X7-2;<br>Q674X7-3; Q674X7-4; Q674X7-5; | Peptide                  | M/z     | z | q-val | P     |
|        |                                                            | SSEVLSATELRVQLAQK        | 620.345 | 3 | 0.000 | 1.000 |
| 427025 | E7EPH0; F8W7B9; O60512;                                    | Peptide                  | M/z     | z | q-val | P     |
|        |                                                            | DKGNEENPHRF              | 448.209 | 3 | 0.001 | 0.992 |
|        |                                                            | DKGNEENPHRF              | 448.210 | 3 | 0.001 | 0.728 |
|        |                                                            | DKGNEENPHRF              | 448.209 | 3 | 0.001 | 0.882 |
|        |                                                            | DKGNEENPHRF              | 448.209 | 3 | 0.000 | 1.000 |
| 427072 | A8MWL7; Q5THN7;                                            | Peptide                  | M/z     | z | q-val | P     |
|        |                                                            | FMPVGLIAGASLLMAAK        | 861.471 | 2 | 0.000 | 1.000 |
|        |                                                            | FMPVGLIAGASLLMAAK        | 574.650 | 3 | 0.000 | 1.000 |
|        |                                                            | FMPVGLIAGASLLMAAK        | 861.475 | 2 | 0.000 | 1.000 |
|        |                                                            | FMPVGLIAGASLLMAAK        | 861.471 | 2 | 0.001 | 0.958 |
|        |                                                            | FMPVGLIAGASLLMAAK        | 574.649 | 3 | 0.001 | 0.931 |
|        |                                                            | FMPVGLIAGASLLMAAK        | 574.649 | 3 | 0.000 | 0.985 |
|        |                                                            | FMPVGLIAGASLLMAAK        | 861.471 | 2 | 0.000 | 0.997 |
|        |                                                            | FMPVGLIAGASLLMAAK        | 861.471 | 2 | 0.001 | 0.722 |
|        |                                                            | FMPVGLIAGASLLMAAK        | 574.650 | 3 | 0.000 | 1.000 |
|        |                                                            | FMPVGLIAGASLLMAAK        | 861.473 | 2 | 0.006 | 0.041 |
|        |                                                            | FMPVGLIAGASLLMAAK        | 574.649 | 3 | 0.000 | 1.000 |

| ID     | Indistinguishable (SameSet) Proteins                                 | Peptide Spectrum Matches  |         |   |       |       |
|--------|----------------------------------------------------------------------|---------------------------|---------|---|-------|-------|
| 427090 | B4DI02; F5H252; Q96A58;                                              | Peptide                   | M/z     | z | q-val | P     |
|        |                                                                      | ILDTAGQEDTIQRE            | 794.895 | 2 | 0.000 | 1.000 |
|        |                                                                      | ILDTAGQEDTIQRE            | 794.896 | 2 | 0.000 | 1.000 |
|        |                                                                      | ILDTAGQEDTIQRE            | 794.895 | 2 | 0.000 | 1.000 |
|        |                                                                      | ILDTAGQEDTIQRE            | 794.895 | 2 | 0.000 | 1.000 |
|        |                                                                      | ILDTAGQEDTIQRE            | 794.895 | 2 | 0.000 | 1.000 |
|        |                                                                      | ILDTAGQEDTIQRE            | 794.895 | 2 | 0.000 | 1.000 |
|        |                                                                      | ILDTAGQEDTIQRE            | 794.894 | 2 | 0.004 | 0.902 |
|        |                                                                      | ILDTAGQEDTIQRE            | 794.893 | 2 | 0.003 | 0.987 |
|        |                                                                      | ILDTAGQEDTIQRE            | 794.894 | 2 | 0.001 | 1.000 |
|        |                                                                      | ILDTAGQEDTIQRE            | 794.896 | 2 | 0.005 | 0.764 |
| 427273 | B4DE21; O15287;                                                      | Peptide                   | M/z     | z | q-val | P     |
|        |                                                                      | ASRLYQQLGDTTAELE          | 897.950 | 2 | 0.000 | 1.000 |
| 427435 | Q9BSM1; Q9BSM1-3;                                                    | Peptide                   | M/z     | z | q-val | P     |
|        |                                                                      | VTQPTGEEPALSNLGLPFSSFDHSK | 886.778 | 3 | 0.000 | 1.000 |
|        |                                                                      | VTQPTGEEPALSNLGLPFSSFDHSK | 886.773 | 3 | 0.000 | 1.000 |
|        |                                                                      | VTQPTGEEPALSNLGLPFSSFDHSK | 886.774 | 3 | 0.000 | 0.999 |
|        |                                                                      | VTQPTGEEPALSNLGLPFSSFDHSK | 886.775 | 3 | 0.001 | 0.971 |
|        |                                                                      | VTQPTGEEPALSNLGLPFSSFDHSK | 886.774 | 3 | 0.000 | 1.000 |
|        |                                                                      | VTQPTGEEPALSNLGLPFSSFDHSK | 886.770 | 3 | 0.000 | 1.000 |
|        |                                                                      | VTQPTGEEPALSNLGLPFSSFDHSK | 886.775 | 3 | 0.001 | 0.787 |
|        |                                                                      | VTQPTGEEPALSNLGLPFSSFDHSK | 886.772 | 3 | 0.000 | 1.000 |
|        |                                                                      | VTQPTGEEPALSNLGLPFSSFDHSK | 886.772 | 3 | 0.000 | 1.000 |
|        |                                                                      | VTQPTGEEPALSNLGLPFSSFDHSK | 886.771 | 3 | 0.000 | 1.000 |
| 427514 | E5RIC9; O15488; O15488-2; O15488-3;<br>O15488-4; O15488-5; O15488-6; | Peptide                   | M/z     | z | q-val | P     |
|        |                                                                      | RPELGLTLTK                | 376.565 | 3 | 0.000 | 1.000 |
| 427799 | E7EQ07; P31277;                                                      | Peptide                   | M/z     | z | q-val | P     |
|        |                                                                      | GAAEGSGGDGEGPPGEAGA EK    | 450.945 | 4 | 0.003 | 0.163 |
|        |                                                                      | GAAEGSGGDGEGPPGEAGA EK    | 900.388 | 2 | 0.000 | 1.000 |
| 428131 | A6NJU0;                                                              | Peptide                   | M/z     | z | q-val | P     |
|        |                                                                      | HCDQNLVASDAPGEEGTGILK     | 737.683 | 3 | 0.000 | 1.000 |
| 428218 | Q8IWE4;                                                              | Peptide                   | M/z     | z | q-val | P     |
|        |                                                                      | YKDEREDAILEEGMER          | 666.973 | 3 | 0.000 | 1.000 |
| 428450 | Q8WU20;                                                              | Peptide                   | M/z     | z | q-val | P     |
|        |                                                                      | FVLGPTPVQK                | 543.321 | 2 | 0.001 | 0.742 |
|        |                                                                      | FVLGPTPVQK                | 543.322 | 2 | 0.000 | 0.900 |
|        |                                                                      | FVLGPTPVQK                | 543.321 | 2 | 0.000 | 1.000 |

| ID     | Indistinguishable (SameSet) Proteins                                       | Peptide Spectrum Matches |         |   |       |       |
|--------|----------------------------------------------------------------------------|--------------------------|---------|---|-------|-------|
|        |                                                                            | Peptide                  | M/z     | z | q-val | P     |
| 428474 | E9PDW5; E9PDX5; Q8WWW0;<br>Q8WWW0-2; Q8WWW0-3; Q8WWW0-4;                   | Peptide                  |         |   |       |       |
|        |                                                                            | DAIKEVNLAATT             | 623.337 | 2 | 0.002 | 0.435 |
|        |                                                                            | DAIKEVNLAATT             | 623.338 | 2 | 0.000 | 1.000 |
|        |                                                                            | DAIKEVNLAATT             | 623.338 | 2 | 0.000 | 0.997 |
| 428489 | A6NJR4; B7ZL8; C9IZ87; P49842;<br>P49842-2; P49842-3; P49842-4;<br>Q5JP78; | Peptide                  | M/z     | z | q-val | P     |
|        |                                                                            | GLFEDALPPIVLR            | 720.416 | 2 | 0.000 | 1.000 |
|        |                                                                            | GLFEDALPPIVLR            | 720.418 | 2 | 0.000 | 1.000 |
|        |                                                                            | GLFEDALPPIVLR            | 720.417 | 2 | 0.001 | 0.994 |
|        |                                                                            | GLFEDALPPIVLR            | 720.416 | 2 | 0.000 | 1.000 |
| 428672 | A6NCP9; P02753; Q5VY30;                                                    | Peptide                  | M/z     | z | q-val | P     |
|        |                                                                            | GLFLQDNIVAE              | 609.822 | 2 | 0.009 | 0.789 |
|        |                                                                            | GLFLQDNIVAE              | 609.822 | 2 | 0.002 | 0.995 |
|        |                                                                            | GLFLQDNIVAE              | 609.822 | 2 | 0.005 | 0.962 |
|        |                                                                            | GLFLQDNIVAE              | 609.822 | 2 | 0.003 | 0.990 |
|        |                                                                            | GLFLQDNIVAE              | 609.822 | 2 | 0.000 | 1.000 |
| 428775 | D6RDM5; D6REN7; D6RIC8; Q86TN9;<br>Q96DR4;                                 | Peptide                  | M/z     | z | q-val | P     |
|        |                                                                            | NTLIQYHSIEEDK            | 530.599 | 3 | 0.007 | 0.055 |
|        |                                                                            | NTLIQYHSIEEDK            | 795.394 | 2 | 0.000 | 0.996 |
|        |                                                                            | NTLIQYHSIEEDK            | 795.394 | 2 | 0.000 | 0.998 |
|        |                                                                            | NTLIQYHSIEEDK            | 530.599 | 3 | 0.000 | 1.000 |
| 428829 | G8JLE4; HOY339; Q8NHY2; Q8NHY2-2;<br>Q8NHY2-3;                             | Peptide                  | M/z     | z | q-val | P     |
|        |                                                                            | FVSGEEIVSASTDSQLK        | 898.949 | 2 | 0.000 | 1.000 |
|        |                                                                            | FVSGEEIVSASTDSQLK        | 899.452 | 2 | 0.000 | 1.000 |
|        |                                                                            | FVSGEEIVSASTDSQLK        | 898.952 | 2 | 0.000 | 1.000 |
|        |                                                                            | FVSGEEIVSASTDSQLK        | 599.636 | 3 | 0.000 | 0.998 |
| 428872 | Q8TF76; Q8TF76-2;                                                          | Peptide                  | M/z     | z | q-val | P     |
|        |                                                                            | LVVGNGPEGPLSSTGK         | 784.919 | 2 | 0.000 | 1.000 |
|        |                                                                            | LVVGNGPEGPLSSTGK         | 784.919 | 2 | 0.000 | 1.000 |
|        |                                                                            | LVVGNGPEGPLSSTGK         | 784.916 | 2 | 0.000 | 1.000 |
|        |                                                                            | LVVGNGPEGPLSSTGK         | 784.918 | 2 | 0.000 | 1.000 |
|        |                                                                            | LVVGNGPEGPLSSTGK         | 784.919 | 2 | 0.000 | 1.000 |

| ID     | Indistinguishable (Sameset) Proteins | Peptide Spectrum Matches |         |   |       |       |
|--------|--------------------------------------|--------------------------|---------|---|-------|-------|
|        |                                      | Peptide                  | M/z     | z | q-val | P     |
| 428884 | Q96S21;                              | LPLPVTIK                 | 440.797 | 2 | 0.001 | 0.999 |
|        |                                      | LPLPVTIK                 | 440.797 | 2 | 0.003 | 0.964 |
|        |                                      | LPLPVTIK                 | 440.798 | 2 | 0.001 | 0.997 |
|        |                                      | LPLPVTIK                 | 440.797 | 2 | 0.001 | 0.996 |
|        |                                      | LPLPVTIK                 | 440.799 | 2 | 0.001 | 0.998 |
|        |                                      | LPLPVTIK                 | 440.797 | 2 | 0.000 | 0.999 |
|        |                                      | LPLPVTIK                 | 440.797 | 2 | 0.001 | 0.999 |
|        |                                      | LPLPVTIK                 | 440.797 | 2 | 0.001 | 0.995 |
|        |                                      | LPLPVTIK                 | 440.798 | 2 | 0.001 | 0.999 |
|        |                                      | LPLPVTIK                 | 440.797 | 2 | 0.003 | 0.843 |
|        |                                      | LPLPVTIK                 | 440.797 | 2 | 0.006 | 0.046 |
|        |                                      | LPLPVTIK                 | 440.797 | 2 | 0.008 | 0.031 |
|        |                                      | LPLPVTIK                 | 440.797 | 2 | 0.002 | 0.320 |
|        |                                      | LPLPVTIK                 | 440.799 | 2 | 0.009 | 0.023 |
|        |                                      | LPLPVTIK                 | 440.797 | 2 | 0.002 | 0.572 |
|        |                                      | LPLPVTIK                 | 440.797 | 2 | 0.004 | 0.108 |
|        |                                      | LPLPVTIK                 | 440.796 | 2 | 0.002 | 0.521 |
|        |                                      | LPLPVTIK                 | 440.797 | 2 | 0.001 | 0.928 |
|        |                                      | LPLPVTIK                 | 440.797 | 2 | 0.002 | 0.687 |
|        |                                      | LPLPVTIK                 | 440.797 | 2 | 0.003 | 0.230 |
|        |                                      | LPLPVTIK                 | 440.797 | 2 | 0.006 | 0.049 |
|        |                                      | LPLPVTIK                 | 440.797 | 2 | 0.001 | 0.717 |
|        |                                      | LPLPVTIK                 | 440.797 | 2 | 0.006 | 0.040 |
|        |                                      | LPLPVTIK                 | 440.797 | 2 | 0.006 | 0.042 |
|        |                                      | LPLPVTIK                 | 440.797 | 2 | 0.002 | 0.324 |
|        |                                      | LPLPVTIK                 | 440.797 | 2 | 0.001 | 0.906 |
|        |                                      | LPLPVTIK                 | 440.797 | 2 | 0.010 | 0.019 |
|        |                                      | LPLPVTIK                 | 440.797 | 2 | 0.000 | 0.986 |
|        |                                      | LPLPVTIK                 | 440.797 | 2 | 0.005 | 0.059 |
|        |                                      | LPLPVTIK                 | 440.797 | 2 | 0.004 | 0.106 |
|        |                                      | LPLPVTIK                 | 440.797 | 2 | 0.002 | 0.253 |
|        |                                      | LPLPVTIK                 | 440.798 | 2 | 0.000 | 0.998 |
|        |                                      | LPLPVTIK                 | 440.797 | 2 | 0.000 | 1.000 |
|        |                                      | LPLPVTIK                 | 440.797 | 2 | 0.006 | 0.071 |
|        |                                      | LPLPVTIK                 | 440.797 | 2 | 0.002 | 0.946 |
|        |                                      | LPLPVTIK                 | 440.797 | 2 | 0.000 | 0.999 |
|        |                                      | LPLPVTIK                 | 440.797 | 2 | 0.001 | 0.983 |
|        |                                      | LPLPVTIK                 | 440.797 | 2 | 0.002 | 0.880 |
|        |                                      | LPLPVTIK                 | 440.797 | 2 | 0.002 | 0.874 |
|        |                                      | LPLPVTIK                 | 440.796 | 2 | 0.001 | 0.997 |

| ID     | Indistinguishable (SameSet) Proteins   | Peptide Spectrum Matches                |         |   |       |       |
|--------|----------------------------------------|-----------------------------------------|---------|---|-------|-------|
|        |                                        | Peptide                                 | M/z     | z | q-val | P     |
|        |                                        | LPLPVTIK                                | 440.797 | 2 | 0.001 | 0.986 |
|        |                                        | LPLPVTIK                                | 440.797 | 2 | 0.001 | 0.996 |
|        |                                        | LPLPVTIK                                | 440.797 | 2 | 0.001 | 0.997 |
|        |                                        | LPLPVTIK                                | 440.797 | 2 | 0.001 | 0.994 |
|        |                                        | LPLPVTIK                                | 440.797 | 2 | 0.003 | 0.477 |
|        |                                        | LPLPVTIK                                | 440.798 | 2 | 0.001 | 0.988 |
|        |                                        | LPLPVTIK                                | 440.797 | 2 | 0.001 | 0.987 |
|        |                                        | LPLPVTIK                                | 440.797 | 2 | 0.001 | 0.976 |
|        |                                        | LPLPVTIK                                | 440.797 | 2 | 0.006 | 0.147 |
|        |                                        | LPLPVTIK                                | 440.797 | 2 | 0.002 | 0.969 |
|        |                                        | LPLPVTIK                                | 440.797 | 2 | 0.002 | 0.969 |
|        |                                        | LPLPVTIK                                | 440.797 | 2 | 0.001 | 0.972 |
| 428924 | C9JKC7; Q9BWK5; Q9BWK5-2;<br>Q9BWK5-3; | Peptide                                 | M/z     | z | q-val | P     |
|        |                                        | SPEEEEEEDVLK                            | 716.822 | 2 | 0.000 | 1.000 |
|        |                                        | SPEEEEEEDVLK                            | 716.819 | 2 | 0.002 | 0.232 |
| 429138 | Q2M2I3;                                | Peptide                                 | M/z     | z | q-val | P     |
|        |                                        | LAQQLGVNPWNTENVDVRVVRGCSFQSRWRRQVSGTVRE | 656.059 | 7 | 0.001 | 1.000 |
|        |                                        | LAQQLGVNPWNTENVDVRVVRGCSFQSRWRRQVSGTVRE | 656.060 | 7 | 0.001 | 1.000 |
|        |                                        | LAQQLGVNPWNTENVDVRVVRGCSFQSRWRRQVSGTVRE | 656.059 | 7 | 0.003 | 0.975 |
|        |                                        | LAQQLGVNPWNTENVDVRVVRGCSFQSRWRRQVSGTVRE | 656.060 | 7 | 0.001 | 0.998 |
|        |                                        | LAQQLGVNPWNTENVDVRVVRGCSFQSRWRRQVSGTVRE | 656.059 | 7 | 0.001 | 1.000 |
|        |                                        | LAQQLGVNPWNTENVDVRVVRGCSFQSRWRRQVSGTVRE | 656.059 | 7 | 0.001 | 1.000 |
|        |                                        | LAQQLGVNPWNTENVDVRVVRGCSFQSRWRRQVSGTVRE | 656.059 | 7 | 0.001 | 1.000 |
|        |                                        | LAQQLGVNPWNTENVDVRVVRGCSFQSRWRRQVSGTVRE | 656.060 | 7 | 0.001 | 1.000 |

| ID      | Indistinguishable (Sameset) Proteins | Peptide Spectrum Matches |         |       |       |       |
|---------|--------------------------------------|--------------------------|---------|-------|-------|-------|
|         |                                      | Peptide                  | M/z     | z     | q-val | P     |
| 429217  | A8MVU6; P04003;                      | VYKLSLE                  | 426.247 | 2     | 0.002 | 0.997 |
|         |                                      | VYKLSLE                  | 426.247 | 2     | 0.001 | 0.999 |
|         |                                      | VYKLSLE                  | 426.248 | 2     | 0.001 | 0.999 |
|         |                                      | VYKLSLE                  | 426.247 | 2     | 0.001 | 0.997 |
|         |                                      | VYKLSLE                  | 426.247 | 2     | 0.002 | 0.993 |
|         |                                      | VYKLSLE                  | 426.247 | 2     | 0.002 | 0.995 |
|         |                                      | VYKLSLE                  | 426.248 | 2     | 0.008 | 0.860 |
|         |                                      | VYKLSLE                  | 426.248 | 2     | 0.001 | 0.999 |
|         |                                      | VYKLSLE                  | 426.247 | 2     | 0.002 | 0.996 |
|         |                                      | VYKLSLE                  | 426.247 | 2     | 0.001 | 0.998 |
|         |                                      | VYKLSLE                  | 426.247 | 2     | 0.001 | 0.998 |
|         |                                      | VYKLSLE                  | 426.247 | 2     | 0.005 | 0.962 |
|         |                                      | VYKLSLE                  | 426.247 | 2     | 0.001 | 0.998 |
|         |                                      | VYKLSLE                  | 426.247 | 2     | 0.001 | 0.999 |
|         |                                      | VYKLSLE                  | 426.247 | 2     | 0.001 | 0.999 |
|         |                                      | VYKLSLE                  | 426.247 | 2     | 0.001 | 0.998 |
|         |                                      | VYKLSLE                  | 426.247 | 2     | 0.001 | 0.997 |
|         |                                      | VYKLSLE                  | 426.247 | 2     | 0.001 | 0.999 |
|         |                                      | VYKLSLE                  | 426.247 | 2     | 0.001 | 0.998 |
|         |                                      | VYKLSLE                  | 426.247 | 2     | 0.001 | 0.999 |
|         |                                      | VYKLSLE                  | 426.247 | 2     | 0.001 | 0.999 |
|         |                                      | VYKLSLE                  | 426.247 | 2     | 0.001 | 0.999 |
|         |                                      | VYKLSLE                  | 426.247 | 2     | 0.002 | 0.994 |
|         |                                      | VYKLSLE                  | 426.247 | 2     | 0.000 | 1.000 |
|         |                                      | VYKLSLE                  | 426.247 | 2     | 0.000 | 1.000 |
|         |                                      | VYKLSLE                  | 426.247 | 2     | 0.001 | 0.999 |
|         |                                      | VYKLSLE                  | 426.247 | 2     | 0.003 | 0.990 |
|         |                                      | VYKLSLE                  | 426.247 | 2     | 0.001 | 0.998 |
|         |                                      | VYKLSLE                  | 426.247 | 2     | 0.001 | 0.999 |
|         |                                      | VYKLSLE                  | 426.247 | 2     | 0.001 | 0.998 |
|         |                                      | VYKLSLE                  | 426.247 | 2     | 0.000 | 1.000 |
|         |                                      | VYKLSLE                  | 426.247 | 2     | 0.001 | 0.997 |
|         |                                      | VYKLSLE                  | 426.247 | 2     | 0.001 | 0.999 |
|         |                                      | VYKLSLE                  | 426.247 | 2     | 0.004 | 0.974 |
|         |                                      | VYKLSLE                  | 426.247 | 2     | 0.005 | 0.959 |
|         |                                      | VYKLSLE                  | 426.247 | 2     | 0.001 | 0.999 |
| VYKLSLE | 426.247                              | 2                        | 0.007   | 0.489 |       |       |
| VYKLSLE | 426.247                              | 2                        | 0.004   | 0.947 |       |       |
| VYKLSLE | 426.247                              | 2                        | 0.006   | 0.661 |       |       |
| VYKLSLE | 426.247                              | 2                        | 0.005   | 0.790 |       |       |

| ID     | Indistinguishable (SameSet) Proteins                         | Peptide Spectrum Matches    |          |   |       |       |
|--------|--------------------------------------------------------------|-----------------------------|----------|---|-------|-------|
|        |                                                              | Peptide                     | M/z      | z | q-val | P     |
|        |                                                              | VYKLSLE                     | 426.247  | 2 | 0.008 | 0.372 |
| 429325 | Q9H579-2;                                                    | Peptide                     | M/z      | z | q-val | P     |
|        |                                                              | LTSAGSFVELLR                | 431.578  | 3 | 0.007 | 0.910 |
|        |                                                              | LTSAGSFVELLR                | 431.579  | 3 | 0.006 | 0.539 |
|        |                                                              | LTSAGSFVELLR                | 431.579  | 3 | 0.007 | 0.137 |
|        |                                                              | LTSAGSFVELLR                | 431.578  | 3 | 0.001 | 0.998 |
|        |                                                              | LTSAGSFVELLR                | 431.579  | 3 | 0.000 | 1.000 |
|        |                                                              | LTSAGSFVELLR                | 431.579  | 3 | 0.001 | 0.861 |
|        |                                                              | LTSAGSFVELLR                | 431.579  | 3 | 0.000 | 1.000 |
|        |                                                              | LTSAGSFVELLR                | 431.578  | 3 | 0.008 | 0.079 |
| 429332 | A6NGC4;                                                      | Peptide                     | M/z      | z | q-val | P     |
|        |                                                              | DNGPVTSNSSTLSLKD            | 817.896  | 2 | 0.007 | 0.133 |
|        |                                                              | DNGPVTSNSSTLSLKD            | 817.896  | 2 | 0.001 | 0.904 |
|        |                                                              | DNGPVTSNSSTLSLKD            | 817.898  | 2 | 0.000 | 1.000 |
|        |                                                              | DNGPVTSNSSTLSLKD            | 817.896  | 2 | 0.000 | 1.000 |
|        |                                                              | DNGPVTSNSSTLSLKD            | 817.897  | 2 | 0.000 | 1.000 |
| 429333 | F8VVN7; F8VWX5; F8W098; F8W120;<br>H0YIA4; Q9BVX2; Q9BVX2-2; | Peptide                     | M/z      | z | q-val | P     |
|        |                                                              | DDRDGLLAEREQEEAIAQFPYVEFTGR | 789.383  | 4 | 0.000 | 1.000 |
|        |                                                              | DDRDGLLAEREQEEAIAQFPYVEFTGR | 789.381  | 4 | 0.000 | 1.000 |
| 429558 | O14944;                                                      | Peptide                     | M/z      | z | q-val | P     |
|        |                                                              | YERVTSGDPELPQV              | 795.395  | 2 | 0.004 | 0.966 |
|        |                                                              | YERVTSGDPELPQV              | 795.394  | 2 | 0.003 | 0.981 |
|        |                                                              | YERVTSGDPELPQV              | 795.395  | 2 | 0.008 | 0.879 |
|        |                                                              | YERVTSGDPELPQV              | 795.394  | 2 | 0.008 | 0.869 |
|        |                                                              | YERVTSGDPELPQV              | 795.395  | 2 | 0.007 | 0.910 |
|        |                                                              | YERVTSGDPELPQV              | 795.394  | 2 | 0.000 | 1.000 |
| 429646 | C9JFW7; E5RFB9; Q2NL68; Q2NL68-2;<br>Q2NL68-3; Q2NL68-4;     | Peptide                     | M/z      | z | q-val | P     |
|        |                                                              | SLPVFSIQDSPFGDAPLGR         | 1002.020 | 2 | 0.001 | 0.674 |
|        |                                                              | SLPVFSIQDSPFGDAPLGR         | 1002.020 | 2 | 0.000 | 1.000 |
|        |                                                              | SLPVFSIQDSPFGDAPLGR         | 1002.020 | 2 | 0.000 | 1.000 |
| 429662 | Q8N414;                                                      | Peptide                     | M/z      | z | q-val | P     |
|        |                                                              | ELLGLEDASPTH                | 641.320  | 2 | 0.000 | 1.000 |
|        |                                                              | ELLGLEDASPTH                | 641.320  | 2 | 0.000 | 0.998 |
|        |                                                              | ELLGLEDASPTH                | 641.319  | 2 | 0.000 | 0.998 |
|        |                                                              | ELLGLEDASPTH                | 641.821  | 2 | 0.001 | 0.887 |
|        |                                                              | ELLGLEDASPTH                | 641.317  | 2 | 0.000 | 0.996 |

| ID     | Indistinguishable (Sameset) Proteins                                                                             | Peptide Spectrum Matches |         |   |       |       |
|--------|------------------------------------------------------------------------------------------------------------------|--------------------------|---------|---|-------|-------|
| 429691 | O95848;                                                                                                          | Peptide                  | M/z     | z | q-val | P     |
|        |                                                                                                                  | VTDAQRSGPGGGLVEE         | 786.387 | 2 | 0.000 | 1.000 |
|        |                                                                                                                  | VTDAQRSGPGGGLVEE         | 786.386 | 2 | 0.006 | 0.937 |
|        |                                                                                                                  | VTDAQRSGPGGGLVEE         | 786.388 | 2 | 0.000 | 1.000 |
|        |                                                                                                                  | VTDAQRSGPGGGLVEE         | 786.386 | 2 | 0.000 | 1.000 |
|        |                                                                                                                  | VTDAQRSGPGGGLVEE         | 786.388 | 2 | 0.000 | 1.000 |
|        |                                                                                                                  | VTDAQRSGPGGGLVEE         | 786.387 | 2 | 0.000 | 1.000 |
|        |                                                                                                                  | VTDAQRSGPGGGLVEE         | 786.387 | 2 | 0.000 | 1.000 |
|        |                                                                                                                  | VTDAQRSGPGGGLVEE         | 786.387 | 2 | 0.000 | 1.000 |
|        |                                                                                                                  | VTDAQRSGPGGGLVEE         | 786.387 | 2 | 0.000 | 1.000 |
|        |                                                                                                                  | VTDAQRSGPGGGLVEE         | 786.386 | 2 | 0.003 | 0.986 |
|        |                                                                                                                  | VTDAQRSGPGGGLVEE         | 786.384 | 2 | 0.005 | 0.826 |
|        |                                                                                                                  | VTDAQRSGPGGGLVEE         | 786.386 | 2 | 0.001 | 1.000 |
| 429808 | B7Z5Q9; F8VR46; F8VSF9; F8VVS4;<br>F8VVT5; F8VVX4; F8VXF3; F8VXV6;<br>F8W052; F8W130; F8W1E3; Q12815;<br>Q6PJU7; | Peptide                  | M/z     | z | q-val | P     |
|        |                                                                                                                  | DPLLRGVSPTPSK            | 684.390 | 2 | 0.003 | 0.205 |
|        |                                                                                                                  | DPLLRGVSPTPSK            | 456.262 | 3 | 0.000 | 1.000 |
|        |                                                                                                                  | DPLLRGVSPTPSK            | 683.887 | 2 | 0.001 | 0.625 |
|        |                                                                                                                  | DPLLRGVSPTPSK            | 456.260 | 3 | 0.000 | 0.981 |
|        |                                                                                                                  | DPLLRGVSPTPSK            | 456.261 | 3 | 0.000 | 0.982 |
| 429928 | A8MYP9; Q96CP7;                                                                                                  | Peptide                  | M/z     | z | q-val | P     |
|        |                                                                                                                  | LAPQAYLTHFFLR            | 526.292 | 3 | 0.000 | 1.000 |
|        |                                                                                                                  | LAPQAYLTHFFLR            | 526.293 | 3 | 0.000 | 1.000 |
| 430171 | F5H3J3; O43529;                                                                                                  | Peptide                  | M/z     | z | q-val | P     |
|        |                                                                                                                  | GIQFEDFVR                | 555.784 | 2 | 0.000 | 1.000 |
|        |                                                                                                                  | GIQFEDFVR                | 555.783 | 2 | 0.001 | 0.957 |
|        |                                                                                                                  | GIQFEDFVR                | 555.783 | 2 | 0.002 | 0.435 |
| 430174 | Q9NQG7; Q9NQG7-3; Q9NQG7-4;                                                                                      | Peptide                  | M/z     | z | q-val | P     |
|        |                                                                                                                  | SSGFNPQDGAFSLSGK         | 848.403 | 2 | 0.000 | 1.000 |
|        |                                                                                                                  | SSGFNPQDGAFSLSGK         | 848.401 | 2 | 0.000 | 0.992 |
|        |                                                                                                                  | SSGFNPQDGAFSLSGK         | 848.400 | 2 | 0.000 | 1.000 |
| 430328 | A8MPW8; Q96IC2; Q96IC2-2;                                                                                        | Peptide                  | M/z     | z | q-val | P     |
|        |                                                                                                                  | DVVGLQTEQRAG             | 636.831 | 2 | 0.000 | 1.000 |
|        |                                                                                                                  | DVVGLQTEQRAG             | 636.831 | 2 | 0.000 | 1.000 |
|        |                                                                                                                  | DVVGLQTEQRAG             | 636.830 | 2 | 0.000 | 1.000 |



| ID     | Indistinguishable (SameSet) Proteins                                 | Peptide Spectrum Matches |          |   |       |       |
|--------|----------------------------------------------------------------------|--------------------------|----------|---|-------|-------|
| 430339 | C9J3I4; F5H7U7; O60507;                                              | Peptide                  | M/z      | z | q-val | P     |
|        |                                                                      | DMPLIFIGGVPR             | 657.867  | 2 | 0.000 | 1.000 |
|        |                                                                      | DMPLIFIGGVPR             | 657.866  | 2 | 0.000 | 1.000 |
|        |                                                                      | DMPLIFIGGVPR             | 657.865  | 2 | 0.000 | 1.000 |
|        |                                                                      | DMPLIFIGGVPR             | 657.862  | 2 | 0.000 | 1.000 |
|        |                                                                      | DMPLIFIGGVPR             | 657.866  | 2 | 0.000 | 0.998 |
|        |                                                                      | DMPLIFIGGVPR             | 657.866  | 2 | 0.000 | 0.999 |
|        |                                                                      | DMPLIFIGGVPR             | 657.863  | 2 | 0.004 | 0.936 |
|        |                                                                      | DMPLIFIGGVPR             | 657.866  | 2 | 0.000 | 1.000 |
|        |                                                                      | DMPLIFIGGVPR             | 657.862  | 2 | 0.000 | 0.999 |
|        |                                                                      | DMPLIFIGGVPR             | 665.863  | 2 | 0.001 | 0.991 |
|        |                                                                      | DMPLIFIGGVPR             | 666.865  | 2 | 0.001 | 0.859 |
|        |                                                                      | DMPLIFIGGVPR             | 665.863  | 2 | 0.000 | 1.000 |
|        |                                                                      | DMPLIFIGGVPR             | 665.839  | 2 | 0.002 | 0.546 |
|        |                                                                      | DMPLIFIGGVPR             | 665.841  | 2 | 0.002 | 0.619 |
| 430395 | Q92982;                                                              | Peptide                  | M/z      | z | q-val | P     |
|        |                                                                      | SAAESMLDIALLMANASQLK     | 693.362  | 3 | 0.000 | 1.000 |
| 430404 | E9PHK0; P05452;                                                      | Peptide                  | M/z      | z | q-val | P     |
|        |                                                                      | GGTLGTPQTGSENDALYEYLR    | 1121.530 | 2 | 0.000 | 1.000 |
| 430420 | B4DGR4; B7ZLJ1; C9IZX4; C9JN62;<br>Q5T4Y7; Q6P9H4; Q8WXI2; Q8WXI2-2; | Peptide                  | M/z      | z | q-val | P     |
|        |                                                                      | STYDGLHVITGTTENSPADR     | 712.006  | 3 | 0.000 | 1.000 |
|        |                                                                      | STYDGLHVITGTTENSPADR     | 712.008  | 3 | 0.000 | 1.000 |
|        |                                                                      | STYDGLHVITGTTENSPADR     | 712.006  | 3 | 0.000 | 1.000 |
| 430664 | Q86VE0;                                                              | Peptide                  | M/z      | z | q-val | P     |
|        |                                                                      | VEITPEPVSVAADVVDGAVVAAR  | 750.092  | 3 | 0.002 | 0.672 |
|        |                                                                      | VEITPEPVSVAADVVDGAVVAAR  | 750.424  | 3 | 0.001 | 0.999 |
|        |                                                                      | VEITPEPVSVAADVVDGAVVAAR  | 750.425  | 3 | 0.000 | 1.000 |
|        |                                                                      | VEITPEPVSVAADVVDGAVVAAR  | 750.090  | 3 | 0.000 | 1.000 |
|        |                                                                      | VEITPEPVSVAADVVDGAVVAAR  | 750.090  | 3 | 0.001 | 0.999 |
|        |                                                                      | VEITPEPVSVAADVVDGAVVAAR  | 750.090  | 3 | 0.000 | 1.000 |
|        |                                                                      | VEITPEPVSVAADVVDGAVVAAR  | 750.090  | 3 | 0.000 | 1.000 |
| 430792 | F8WCX1;                                                              | Peptide                  | M/z      | z | q-val | P     |
|        |                                                                      | YAAALEEVADGAR            | 668.332  | 2 | 0.000 | 1.000 |
|        |                                                                      | YAAALEEVADGAR            | 668.331  | 2 | 0.000 | 1.000 |
|        |                                                                      | YAAALEEVADGAR            | 668.330  | 2 | 0.000 | 0.996 |
| 431112 | Q9C0D4;                                                              | Peptide                  | M/z      | z | q-val | P     |
|        |                                                                      | LVGIDSFQPSVQK            | 709.889  | 2 | 0.000 | 1.000 |
| 431154 | Q9H3S5;                                                              | Peptide                  | M/z      | z | q-val | P     |
|        |                                                                      | YTDIDYQVFTDAAR           | 839.392  | 2 | 0.000 | 1.000 |

| ID     | Indistinguishable (Sameset) Proteins | Peptide Spectrum Matches     |         |   |       |       |
|--------|--------------------------------------|------------------------------|---------|---|-------|-------|
|        |                                      | Peptide                      | M/z     | z | q-val | P     |
| 431205 | Q15848;                              | DSTFTGFLLYH                  | 650.814 | 2 | 0.000 | 0.996 |
|        |                                      | DSTFTGFLLYH                  | 650.814 | 2 | 0.002 | 0.449 |
|        |                                      | DSTFTGFLLYH                  | 650.815 | 2 | 0.000 | 1.000 |
|        |                                      | DSTFTGFLLYH                  | 650.815 | 2 | 0.000 | 1.000 |
| 431254 | Q6N018; Q9P2G9;                      | LLSSSDLNIENEK                | 487.916 | 3 | 0.007 | 0.136 |
|        |                                      | LLSSSDLNIENEK                | 731.878 | 2 | 0.000 | 1.000 |
|        |                                      | LLSSSDLNIENEK                | 731.376 | 2 | 0.000 | 1.000 |
|        |                                      | LLSSSDLNIENEK                | 731.375 | 2 | 0.000 | 1.000 |
|        |                                      | LLSSSDLNIENEK                | 731.375 | 2 | 0.000 | 1.000 |
|        |                                      | LLSSSDLNIENEK                | 731.375 | 2 | 0.000 | 1.000 |
| 431282 | Q9P2F8;                              | DLNSKENLDADEGDGKSN           | 640.952 | 3 | 0.000 | 1.000 |
|        |                                      | DLNSKENLDADEGDGKSN           | 640.952 | 3 | 0.000 | 1.000 |
| 431479 | Q9NQZ7;                              | FDHEESDAEATQELAAGR           | 697.635 | 3 | 0.000 | 1.000 |
|        |                                      | FDHEESDAEATQELAAGR           | 697.637 | 3 | 0.000 | 1.000 |
|        |                                      | FDHEESDAEATQELAAGR           | 697.300 | 3 | 0.000 | 1.000 |
|        |                                      | FDHEESDAEATQELAAGR           | 697.300 | 3 | 0.000 | 1.000 |
| 431583 | A8MX15; B8ZZ95; Q96G27;              | DSGIELCPCPASGEGEPVKEVRVSATLP | 739.361 | 4 | 0.003 | 0.397 |
|        |                                      | DSGIELCPCPASGEGEPVKEVRVSATLP | 739.362 | 4 | 0.000 | 1.000 |
|        |                                      | DSGIELCPCPASGEGEPVKEVRVSATLP | 739.362 | 4 | 0.004 | 0.276 |
|        |                                      | DSGIELCPCPASGEGEPVKEVRVSATLP | 591.691 | 5 | 0.004 | 0.259 |
|        |                                      | DSGIELCPCPASGEGEPVKEVRVSATLP | 739.363 | 4 | 0.005 | 0.206 |
|        |                                      | DSGIELCPCPASGEGEPVKEVRVSATLP | 739.363 | 4 | 0.004 | 0.267 |
|        |                                      | DSGIELCPCPASGEGEPVKEVRVSATLP | 739.363 | 4 | 0.009 | 0.100 |
|        |                                      | DSGIELCPCPASGEGEPVKEVRVSATLP | 739.363 | 4 | 0.009 | 0.100 |
| 431606 | Q99675;                              | VGLSESEVEPSEENSK             | 860.401 | 2 | 0.000 | 1.000 |
|        |                                      | VGLSESEVEPSEENSK             | 860.401 | 2 | 0.000 | 1.000 |
| 431617 | P0DI83;                              | AEGSRPGGAAPVPEEGGR           | 565.278 | 3 | 0.000 | 1.000 |
|        |                                      | AEGSRPGGAAPVPEEGGR           | 565.278 | 3 | 0.000 | 1.000 |
| 431623 | O43653;                              | AVGLLTVISK                   | 500.824 | 2 | 0.000 | 1.000 |
|        |                                      | AVGLLTVISK                   | 500.824 | 2 | 0.000 | 1.000 |
|        |                                      | AVGLLTVISK                   | 500.824 | 2 | 0.000 | 1.000 |
|        |                                      | AVGLLTVISK                   | 500.824 | 2 | 0.000 | 1.000 |
| 431631 | Q9UPG8;                              | YQLGSTSYLPDK                 | 686.345 | 2 | 0.000 | 1.000 |
|        |                                      | YQLGSTSYLPDK                 | 686.342 | 2 | 0.000 | 0.996 |
|        |                                      | YQLGSTSYLPDK                 | 686.342 | 2 | 0.000 | 0.996 |

| ID            | Indistinguishable (SameSet) Proteins         | Peptide Spectrum Matches             |          |         |       |       |
|---------------|----------------------------------------------|--------------------------------------|----------|---------|-------|-------|
| 431788        | B4DVF5; B4E023; Q96KP6;                      | Peptide                              | M/z      | z       | q-val | P     |
|               |                                              | REEKEKER                             | 552.294  | 2       | 0.010 | 0.561 |
|               |                                              | REEKEKER                             | 552.294  | 2       | 0.006 | 0.882 |
|               |                                              | REEKEKER                             | 368.532  | 3       | 0.005 | 0.825 |
|               |                                              | REEKEKER                             | 552.294  | 2       | 0.000 | 1.000 |
|               |                                              | REEKEKER                             | 368.532  | 3       | 0.002 | 0.975 |
|               |                                              | REEKEKER                             | 552.294  | 2       | 0.000 | 1.000 |
|               |                                              | REEKEKER                             | 368.532  | 3       | 0.003 | 0.950 |
|               |                                              | REEKEKER                             | 552.294  | 2       | 0.000 | 1.000 |
|               |                                              | REEKEKER                             | 552.294  | 2       | 0.000 | 1.000 |
|               |                                              | REEKEKER                             | 368.532  | 3       | 0.004 | 0.870 |
|               |                                              | REEKEKER                             | 552.294  | 2       | 0.005 | 0.833 |
|               |                                              | REEKEKER                             | 552.294  | 2       | 0.003 | 0.941 |
|               |                                              | REEKEKER                             | 368.531  | 3       | 0.008 | 0.695 |
|               |                                              | REEKEKER                             | 368.532  | 3       | 0.002 | 0.970 |
|               |                                              | REEKEKER                             | 552.294  | 2       | 0.000 | 1.000 |
|               |                                              | REEKEKER                             | 552.294  | 2       | 0.005 | 0.753 |
|               |                                              | REEKEKER                             | 552.294  | 2       | 0.004 | 0.812 |
|               |                                              | 431888                               | Q06520;  | Peptide | M/z   | z     |
| NHFTVAQAEDFDK | 507.904                                      |                                      |          | 3       | 0.000 | 1.000 |
| 432036        | F5H4T9; F8W7K0; Q5JW02; Q9NQQ7;<br>Q9NQQ7-2; | Peptide                              | M/z      | z       | q-val | P     |
|               |                                              | SSQREEGDNEEEYFVAQGQQ                 | 820.347  | 3       | 0.000 | 1.000 |
|               |                                              | SSQREEGDNEEEYFVAQGQQ                 | 820.347  | 3       | 0.000 | 1.000 |
|               |                                              | SSQREEGDNEEEYFVAQGQQ                 | 820.347  | 3       | 0.000 | 1.000 |
|               |                                              | SSQREEGDNEEEYFVAQGQQ                 | 820.348  | 3       | 0.002 | 0.225 |
|               |                                              | SSQREEGDNEEEYFVAQGQQ                 | 1230.010 | 2       | 0.002 | 0.231 |
|               |                                              | SSQREEGDNEEEYFVAQGQQ                 | 820.344  | 3       | 0.004 | 0.187 |
| 432130        | E5RG64; E5RHG5; E5RI40;                      | Peptide                              | M/z      | z       | q-val | P     |
|               |                                              | LRNEDYHDYSSTDVSPPEESPSEGLNNLSSPGSYQR | 983.190  | 4       | 0.000 | 1.000 |
|               |                                              | LRNEDYHDYSSTDVSPPEESPSEGLNNLSSPGSYQR | 983.438  | 4       | 0.000 | 1.000 |

| ID                | Indistinguishable (SameSet) Proteins | Peptide Spectrum Matches      |                                                                  |         |       |       |
|-------------------|--------------------------------------|-------------------------------|------------------------------------------------------------------|---------|-------|-------|
|                   |                                      | Peptide                       | M/z                                                              | z       | q-val | P     |
| 432391            | E9PC53; Q8TBK2; Q8TBK2-2;            | Peptide                       | M/z                                                              | z       | q-val | P     |
|                   |                                      | ESVQAGELLFVVPR                | 772.930                                                          | 2       | 0.001 | 0.897 |
|                   |                                      | ESVQAGELLFVVPR                | 772.429                                                          | 2       | 0.000 | 1.000 |
|                   |                                      | ESVQAGELLFVVPR                | 772.429                                                          | 2       | 0.000 | 1.000 |
|                   |                                      | ESVQAGELLFVVPR                | 772.930                                                          | 2       | 0.001 | 0.810 |
|                   |                                      | ESVQAGELLFVVPR                | 515.287                                                          | 3       | 0.003 | 0.214 |
|                   |                                      | ESVQAGELLFVVPR                | 772.930                                                          | 2       | 0.001 | 0.906 |
|                   |                                      | ESVQAGELLFVVPR                | 515.286                                                          | 3       | 0.002 | 0.543 |
|                   |                                      | ESVQAGELLFVVPR                | 772.429                                                          | 2       | 0.000 | 1.000 |
|                   |                                      | ESVQAGELLFVVPR                | 772.428                                                          | 2       | 0.000 | 1.000 |
|                   |                                      | ESVQAGELLFVVPR                | 772.429                                                          | 2       | 0.001 | 0.958 |
|                   |                                      | ESVQAGELLFVVPR                | 772.928                                                          | 2       | 0.001 | 0.935 |
|                   |                                      | ESVQAGELLFVVPR                | 772.427                                                          | 2       | 0.002 | 0.619 |
|                   |                                      | ESVQAGELLFVVPR                | 772.427                                                          | 2       | 0.000 | 0.992 |
|                   |                                      | ESVQAGELLFVVPR                | 772.427                                                          | 2       | 0.009 | 0.021 |
|                   |                                      | ESVQAGELLFVVPR                | 772.429                                                          | 2       | 0.003 | 0.215 |
|                   |                                      | ESVQAGELLFVVPR                | 772.430                                                          | 2       | 0.002 | 0.426 |
|                   |                                      | 432408                        | C9JL32; C9JMF3; E1P5H9; Q96BD0;<br>Q96BD0-2; Q96BD0-3; Q96BD0-4; | Peptide | M/z   | z     |
| DKPLTFPSPNSAMENGL | 917.440                              |                               |                                                                  | 2       | 0.010 | 0.107 |
| DKPLTFPSPNSAMENGL | 917.440                              |                               |                                                                  | 2       | 0.000 | 1.000 |
| DKPLTFPSPNSAMENGL | 917.440                              |                               |                                                                  | 2       | 0.000 | 1.000 |
| DKPLTFPSPNSAMENGL | 917.440                              |                               |                                                                  | 2       | 0.000 | 1.000 |
| 432420            | Q7Z4H4;                              | Peptide                       | M/z                                                              | z       | q-val | P     |
|                   |                                      | MARIPTAALGCISLLCLQLPGSLSRSLGG | 1010.880                                                         | 3       | 0.001 | 0.790 |
|                   |                                      | MARIPTAALGCISLLCLQLPGSLSRSLGG | 1010.880                                                         | 3       | 0.001 | 0.972 |
|                   |                                      | MARIPTAALGCISLLCLQLPGSLSRSLGG | 1010.880                                                         | 3       | 0.001 | 0.938 |
|                   |                                      | MARIPTAALGCISLLCLQLPGSLSRSLGG | 1010.880                                                         | 3       | 0.000 | 1.000 |

| ID     | Indistinguishable (SameSet) Proteins | Peptide Spectrum Matches |         |   |       |       |
|--------|--------------------------------------|--------------------------|---------|---|-------|-------|
| 432427 | B0YJ81;                              | Peptide                  | M/z     | z | q-val | P     |
|        |                                      | HGEVIVEKDD               | 570.778 | 2 | 0.002 | 0.994 |
|        |                                      | HGEVIVEKDD               | 570.779 | 2 | 0.000 | 1.000 |
|        |                                      | HGEVIVEKDD               | 570.780 | 2 | 0.000 | 0.999 |
|        |                                      | HGEVIVEKDD               | 570.779 | 2 | 0.003 | 0.987 |
|        |                                      | HGEVIVEKDD               | 570.781 | 2 | 0.003 | 0.977 |
|        |                                      | HGEVIVEKDD               | 570.780 | 2 | 0.000 | 0.996 |
|        |                                      | HGEVIVEKDD               | 570.781 | 2 | 0.000 | 1.000 |
|        |                                      | HGEVIVEKDD               | 570.781 | 2 | 0.000 | 0.999 |
|        |                                      | HGEVIVEKDD               | 570.781 | 2 | 0.000 | 1.000 |
|        |                                      | HGEVIVEKDD               | 570.780 | 2 | 0.002 | 0.561 |
|        |                                      | HGEVIVEKDD               | 570.781 | 2 | 0.000 | 1.000 |
|        |                                      | HGEVIVEKDD               | 570.781 | 2 | 0.000 | 1.000 |
|        |                                      | HGEVIVEKDD               | 570.781 | 2 | 0.001 | 0.958 |
| 432435 | Q9UEE5;                              | Peptide                  | M/z     | z | q-val | P     |
|        |                                      | DLKPQNILLTSESPLG         | 862.974 | 2 | 0.004 | 0.289 |
|        |                                      | DLKPQNILLTSESPLG         | 862.975 | 2 | 0.002 | 0.565 |
|        |                                      | DLKPQNILLTSESPLG         | 862.975 | 2 | 0.004 | 0.258 |
|        |                                      | DLKPQNILLTSESPLG         | 862.977 | 2 | 0.000 | 0.989 |
|        |                                      | DLKPQNILLTSESPLG         | 862.976 | 2 | 0.000 | 0.991 |
|        |                                      | DLKPQNILLTSESPLG         | 862.975 | 2 | 0.001 | 0.929 |
|        |                                      | DLKPQNILLTSESPLG         | 862.974 | 2 | 0.001 | 0.842 |
|        |                                      | DLKPQNILLTSESPLG         | 862.975 | 2 | 0.000 | 0.984 |
|        |                                      | DLKPQNILLTSESPLG         | 862.976 | 2 | 0.000 | 1.000 |
|        |                                      | DLKPQNILLTSESPLG         | 863.478 | 2 | 0.000 | 0.998 |
|        |                                      | DLKPQNILLTSESPLG         | 862.977 | 2 | 0.000 | 1.000 |
|        |                                      | DLKPQNILLTSESPLG         | 862.976 | 2 | 0.000 | 1.000 |
|        |                                      | DLKPQNILLTSESPLG         | 862.976 | 2 | 0.000 | 0.999 |
|        |                                      | DLKPQNILLTSESPLG         | 862.975 | 2 | 0.000 | 1.000 |
|        |                                      | DLKPQNILLTSESPLG         | 862.975 | 2 | 0.000 | 1.000 |
|        |                                      | DLKPQNILLTSESPLG         | 862.976 | 2 | 0.000 | 1.000 |
|        |                                      | DLKPQNILLTSESPLG         | 862.975 | 2 | 0.001 | 0.913 |
|        |                                      | DLKPQNILLTSESPLG         | 862.477 | 2 | 0.001 | 0.958 |
|        |                                      | DLKPQNILLTSESPLG         | 862.478 | 2 | 0.004 | 0.324 |
|        |                                      | DLKPQNILLTSESPLG         | 862.479 | 2 | 0.002 | 0.709 |
|        |                                      | DLKPQNILLTSESPLG         | 862.479 | 2 | 0.001 | 0.933 |
|        |                                      | DLKPQNILLTSESPLG         | 862.479 | 2 | 0.003 | 0.486 |
| 432527 | O95150; O95150-2; O95150-3;          | Peptide                  | M/z     | z | q-val | P     |
|        |                                      | DKTFFGAFLL               | 580.314 | 2 | 0.000 | 1.000 |

| ID     | Indistinguishable (Sameset) Proteins | Peptide Spectrum Matches |         |   |       |       |
|--------|--------------------------------------|--------------------------|---------|---|-------|-------|
|        |                                      | Peptide                  | M/z     | z | q-val | P     |
| 432583 | Q92535;                              | Peptide                  | M/z     | z | q-val | P     |
|        |                                      | DEAEIKEDLSRFLS           | 551.278 | 3 | 0.000 | 0.986 |
|        |                                      | DEAEIKEDLSRFLS           | 551.278 | 3 | 0.000 | 1.000 |
| 432634 | B4DJI0; Q96SQ9; Q96SQ9-2;            | Peptide                  | M/z     | z | q-val | P     |
|        |                                      | LLALVPMGIPR              | 598.366 | 2 | 0.000 | 1.000 |
| 432730 | C9JG30; P11926;                      | Peptide                  | M/z     | z | q-val | P     |
|        |                                      | DAFYVADLGDILKK           | 784.426 | 2 | 0.000 | 1.000 |
|        |                                      | DAFYVADLGDILKK           | 523.284 | 3 | 0.001 | 0.857 |
| 432788 | B1AKT1; Q9H040;                      | Peptide                  | M/z     | z | q-val | P     |
|        |                                      | GYVLGETSNLPSGK           | 759.893 | 2 | 0.001 | 0.881 |
|        |                                      | GYVLGETSNLPSGK           | 759.893 | 2 | 0.000 | 0.999 |
|        |                                      | GYVLGETSNLPSGK           | 759.895 | 2 | 0.000 | 1.000 |
|        |                                      | GYVLGETSNLPSGK           | 759.893 | 2 | 0.000 | 1.000 |
|        |                                      | GYVLGETSNLPSGK           | 759.893 | 2 | 0.002 | 0.450 |
|        |                                      | GYVLGETSNLPSGK           | 759.893 | 2 | 0.000 | 1.000 |
| 432965 | C9J8H5; Q9HA38; Q9HA38-2;            | Peptide                  | M/z     | z | q-val | P     |
|        |                                      | LCNVTLNSAQQQAQAHYQGK     | 711.016 | 3 | 0.000 | 1.000 |
|        |                                      | LCNVTLNSAQQQAQAHYQGK     | 711.347 | 3 | 0.005 | 0.114 |

| ID     | Indistinguishable (Sameset) Proteins | Peptide Spectrum Matches |         |   |       |       |
|--------|--------------------------------------|--------------------------|---------|---|-------|-------|
| 432972 | A8MXQ0; O95399; O95399-2; Q5H8X8;    | Peptide                  | M/z     | z | q-val | P     |
|        |                                      | LTPEELER                 | 493.758 | 2 | 0.000 | 1.000 |
|        |                                      | LTPEELER                 | 493.759 | 2 | 0.000 | 1.000 |
|        |                                      | LTPEELER                 | 493.759 | 2 | 0.000 | 1.000 |
|        |                                      | LTPEELER                 | 493.760 | 2 | 0.000 | 0.999 |
|        |                                      | LTPEELER                 | 493.762 | 2 | 0.000 | 1.000 |
|        |                                      | LTPEELER                 | 493.762 | 2 | 0.002 | 0.589 |
|        |                                      | LTPEELER                 | 493.762 | 2 | 0.000 | 1.000 |
|        |                                      | LTPEELER                 | 493.763 | 2 | 0.000 | 1.000 |
|        |                                      | LTPEELER                 | 493.763 | 2 | 0.000 | 1.000 |
|        |                                      | LTPEELER                 | 493.761 | 2 | 0.000 | 1.000 |
|        |                                      | LTPEELER                 | 493.760 | 2 | 0.001 | 0.999 |
|        |                                      | LTPEELER                 | 493.761 | 2 | 0.001 | 0.998 |
|        |                                      | LTPEELER                 | 493.762 | 2 | 0.000 | 0.999 |
|        |                                      | LTPEELER                 | 493.760 | 2 | 0.001 | 0.997 |
|        |                                      | LTPEELER                 | 493.761 | 2 | 0.000 | 0.999 |
|        |                                      | LTPEELER                 | 493.761 | 2 | 0.001 | 0.996 |
|        |                                      | LTPEELER                 | 493.762 | 2 | 0.001 | 0.995 |
|        |                                      | LTPEELER                 | 493.760 | 2 | 0.001 | 0.988 |
|        |                                      | LTPEELER                 | 493.762 | 2 | 0.002 | 0.954 |
|        |                                      | LTPEELER                 | 493.762 | 2 | 0.001 | 0.991 |
|        |                                      | LTPEELER                 | 493.760 | 2 | 0.003 | 0.916 |
|        |                                      | LTPEELER                 | 493.761 | 2 | 0.003 | 0.890 |
|        |                                      | LTPEELER                 | 493.760 | 2 | 0.003 | 0.918 |
|        |                                      | LTPEELER                 | 493.762 | 2 | 0.001 | 0.983 |
|        |                                      | LTPEELER                 | 493.760 | 2 | 0.002 | 0.955 |
|        |                                      | LTPEELER                 | 493.760 | 2 | 0.001 | 0.984 |
|        |                                      | LTPEELER                 | 493.760 | 2 | 0.002 | 0.954 |
|        |                                      | LTPEELER                 | 493.761 | 2 | 0.001 | 0.963 |
|        |                                      | LTPEELER                 | 493.761 | 2 | 0.001 | 0.998 |
|        |                                      | LTPEELER                 | 493.762 | 2 | 0.003 | 0.952 |
|        |                                      | LTPEELER                 | 493.762 | 2 | 0.003 | 0.870 |
|        |                                      | LTPEELER                 | 493.762 | 2 | 0.003 | 0.914 |
|        |                                      | LTPEELER                 | 493.761 | 2 | 0.007 | 0.708 |
|        |                                      | LTPEELER                 | 493.762 | 2 | 0.000 | 0.996 |
|        |                                      | LTPEELER                 | 493.763 | 2 | 0.008 | 0.121 |
|        |                                      | LTPEELER                 | 493.762 | 2 | 0.003 | 0.543 |
|        |                                      | LTPEELER                 | 493.762 | 2 | 0.003 | 0.436 |
|        |                                      | LTPEELER                 | 493.762 | 2 | 0.005 | 0.253 |
|        |                                      | LTPEELER                 | 493.761 | 2 | 0.002 | 0.991 |
|        |                                      | LTPEELER                 | 493.761 | 2 | 0.002 | 0.984 |

| ID | Indistinguishable (Sameset) Proteins | Peptide Spectrum Matches |         |       |             |       |
|----|--------------------------------------|--------------------------|---------|-------|-------------|-------|
|    |                                      | Peptide                  | Score   | Count | Probability |       |
|    |                                      | LTPEELER                 | 493.761 | 2     | 0.005       | 0.905 |
|    |                                      | LTPEELER                 | 493.761 | 2     | 0.002       | 0.981 |
|    |                                      | LTPEELER                 | 493.761 | 2     | 0.001       | 0.988 |
|    |                                      | LTPEELER                 | 493.762 | 2     | 0.001       | 0.995 |
|    |                                      | LTPEELER                 | 493.762 | 2     | 0.002       | 0.986 |
|    |                                      | LTPEELER                 | 493.761 | 2     | 0.001       | 0.995 |
|    |                                      | LTPEELER                 | 493.761 | 2     | 0.000       | 0.999 |
|    |                                      | LTPEELER                 | 493.761 | 2     | 0.000       | 1.000 |
|    |                                      | LTPEELER                 | 493.761 | 2     | 0.001       | 0.998 |
|    |                                      | LTPEELER                 | 493.761 | 2     | 0.000       | 0.999 |
|    |                                      | LTPEELER                 | 493.762 | 2     | 0.001       | 0.985 |
|    |                                      | LTPEELER                 | 493.761 | 2     | 0.001       | 0.996 |
|    |                                      | LTPEELER                 | 493.762 | 2     | 0.001       | 0.989 |
|    |                                      | LTPEELER                 | 493.762 | 2     | 0.004       | 0.859 |
|    |                                      | LTPEELER                 | 493.762 | 2     | 0.008       | 0.124 |
|    |                                      | LTPEELER                 | 493.762 | 2     | 0.005       | 0.256 |
|    |                                      | LTPEELER                 | 493.761 | 2     | 0.001       | 0.997 |
|    |                                      | LTPEELER                 | 493.761 | 2     | 0.001       | 0.999 |
|    |                                      | LTPEELER                 | 493.761 | 2     | 0.001       | 0.998 |
|    |                                      | LTPEELER                 | 493.762 | 2     | 0.000       | 0.999 |
|    |                                      | LTPEELER                 | 493.761 | 2     | 0.000       | 1.000 |
|    |                                      | LTPEELER                 | 493.762 | 2     | 0.002       | 0.965 |
|    |                                      | LTPEELER                 | 493.761 | 2     | 0.001       | 0.994 |
|    |                                      | LTPEELER                 | 493.761 | 2     | 0.001       | 0.993 |
|    |                                      | LTPEELER                 | 493.761 | 2     | 0.002       | 0.979 |
|    |                                      | LTPEELER                 | 493.762 | 2     | 0.002       | 0.981 |
|    |                                      | LTPEELER                 | 493.761 | 2     | 0.001       | 0.970 |
|    |                                      | LTPEELER                 | 493.760 | 2     | 0.009       | 0.469 |
|    |                                      | LTPEELER                 | 493.762 | 2     | 0.002       | 0.950 |
|    |                                      | LTPEELER                 | 493.761 | 2     | 0.002       | 0.969 |
|    |                                      | LTPEELER                 | 493.761 | 2     | 0.001       | 0.982 |
|    |                                      | LTPEELER                 | 493.762 | 2     | 0.003       | 0.945 |
|    |                                      | LTPEELER                 | 493.762 | 2     | 0.002       | 0.974 |
|    |                                      | LTPEELER                 | 493.762 | 2     | 0.001       | 0.994 |
|    |                                      | LTPEELER                 | 493.762 | 2     | 0.002       | 0.985 |
|    |                                      | LTPEELER                 | 493.762 | 2     | 0.009       | 0.023 |
|    |                                      | LTPEELER                 | 493.761 | 2     | 0.003       | 0.148 |
|    |                                      | LTPEELER                 | 493.761 | 2     | 0.001       | 0.903 |
|    |                                      | LTPEELER                 | 493.761 | 2     | 0.010       | 0.020 |
|    |                                      | LTPEELER                 | 493.760 | 2     | 0.001       | 0.809 |
|    |                                      | LTPEELER                 | 493.761 | 2     | 0.003       | 0.188 |



| ID | Indistinguishable (Sameset) Proteins | Peptide Spectrum Matches |         |       |             |       |
|----|--------------------------------------|--------------------------|---------|-------|-------------|-------|
|    |                                      | Peptide                  | Score   | Count | Probability |       |
|    |                                      | LTPEELER                 | 493.761 | 2     | 0.003       | 0.197 |
|    |                                      | LTPEELER                 | 493.761 | 2     | 0.003       | 0.253 |
|    |                                      | LTPEELER                 | 493.761 | 2     | 0.001       | 0.938 |
|    |                                      | LTPEELER                 | 493.762 | 2     | 0.001       | 0.935 |
|    |                                      | LTPEELER                 | 493.761 | 2     | 0.001       | 0.957 |
|    |                                      | LTPEELER                 | 493.762 | 2     | 0.001       | 0.931 |
|    |                                      | LTPEELER                 | 493.762 | 2     | 0.001       | 0.975 |
|    |                                      | LTPEELER                 | 493.761 | 2     | 0.000       | 1.000 |
|    |                                      | LTPEELER                 | 493.761 | 2     | 0.000       | 1.000 |
|    |                                      | LTPEELER                 | 493.761 | 2     | 0.000       | 0.998 |
|    |                                      | LTPEELER                 | 493.761 | 2     | 0.000       | 1.000 |
|    |                                      | LTPEELER                 | 493.762 | 2     | 0.000       | 1.000 |
|    |                                      | LTPEELER                 | 493.762 | 2     | 0.000       | 1.000 |
|    |                                      | LTPEELER                 | 493.763 | 2     | 0.000       | 0.998 |
|    |                                      | LTPEELER                 | 493.761 | 2     | 0.000       | 1.000 |
|    |                                      | LTPEELER                 | 493.761 | 2     | 0.000       | 1.000 |
|    |                                      | LTPEELER                 | 493.761 | 2     | 0.000       | 0.999 |
|    |                                      | LTPEELER                 | 493.761 | 2     | 0.000       | 1.000 |
|    |                                      | LTPEELER                 | 493.761 | 2     | 0.000       | 1.000 |
|    |                                      | LTPEELER                 | 493.761 | 2     | 0.000       | 0.999 |
|    |                                      | LTPEELER                 | 493.761 | 2     | 0.000       | 1.000 |
|    |                                      | LTPEELER                 | 493.761 | 2     | 0.000       | 1.000 |
|    |                                      | LTPEELER                 | 493.761 | 2     | 0.000       | 1.000 |
|    |                                      | LTPEELER                 | 493.761 | 2     | 0.000       | 1.000 |
|    |                                      | LTPEELER                 | 493.761 | 2     | 0.000       | 1.000 |
|    |                                      | LTPEELER                 | 493.761 | 2     | 0.000       | 1.000 |
|    |                                      | LTPEELER                 | 493.761 | 2     | 0.000       | 1.000 |
|    |                                      | LTPEELER                 | 493.762 | 2     | 0.000       | 1.000 |
|    |                                      | LTPEELER                 | 493.762 | 2     | 0.000       | 1.000 |
|    |                                      | LTPEELER                 | 493.762 | 2     | 0.000       | 1.000 |
|    |                                      | LTPEELER                 | 493.761 | 2     | 0.000       | 1.000 |
|    |                                      | LTPEELER                 | 493.762 | 2     | 0.000       | 1.000 |
|    |                                      | LTPEELER                 | 493.761 | 2     | 0.000       | 1.000 |
|    |                                      | LTPEELER                 | 493.761 | 2     | 0.000       | 1.000 |
|    |                                      | LTPEELER                 | 493.762 | 2     | 0.000       | 1.000 |
|    |                                      | LTPEELER                 | 493.761 | 2     | 0.000       | 1.000 |
|    |                                      | LTPEELER                 | 493.761 | 2     | 0.000       | 1.000 |
|    |                                      | LTPEELER                 | 493.762 | 2     | 0.000       | 1.000 |
|    |                                      | LTPEELER                 | 493.761 | 2     | 0.000       | 1.000 |
|    |                                      | LTPEELER                 | 493.761 | 2     | 0.000       | 1.000 |
|    |                                      | LTPEELER                 | 494.265 | 2     | 0.002       | 0.936 |
|    |                                      | LTPEELER                 | 493.761 | 2     | 0.000       | 1.000 |
|    |                                      | LTPEELER                 | 493.761 | 2     | 0.000       | 1.000 |
|    |                                      | LTPEELER                 | 493.761 | 2     | 0.000       | 1.000 |
|    |                                      | LTPEELER                 | 493.761 | 2     | 0.000       | 1.000 |
|    |                                      | LTPEELER                 | 493.762 | 2     | 0.000       | 1.000 |
|    |                                      | LTPEELER                 | 493.761 | 2     | 0.000       | 1.000 |
|    |                                      | LTPEELER                 | 494.268 | 2     | 0.002       | 0.972 |
|    |                                      | LTPEELER                 | 493.761 | 2     | 0.000       | 1.000 |
|    |                                      | LTPEELER                 | 493.761 | 2     | 0.000       | 1.000 |
|    |                                      | LTPEELER                 | 493.761 | 2     | 0.000       | 1.000 |

| ID     | Indistinguishable (Sameset) Proteins               | Peptide Spectrum Matches |         |   |       |       |
|--------|----------------------------------------------------|--------------------------|---------|---|-------|-------|
|        |                                                    | Peptide                  | M/z     | z | q-val | P     |
|        |                                                    | LTPEELER                 | 493.762 | 2 | 0.002 | 0.532 |
|        |                                                    | LTPEELER                 | 493.761 | 2 | 0.006 | 0.134 |
|        |                                                    | LTPEELER                 | 493.762 | 2 | 0.002 | 0.579 |
|        |                                                    | LTPEELER                 | 493.762 | 2 | 0.002 | 0.436 |
| 432975 | F5GXX6; F5H271; Q9NQ89;                            | Peptide                  | M/z     | z | q-val | P     |
|        |                                                    | SLTDQDVNSLAAQHFESQQDLENK | 906.426 | 3 | 0.000 | 1.000 |
| 433049 | C9IYC4; C9JNP0; Q9UK00;                            | Peptide                  | M/z     | z | q-val | P     |
|        |                                                    | DELEQELLEHGR             | 489.908 | 3 | 0.000 | 0.998 |
|        |                                                    | DELEQELLEHGR             | 489.909 | 3 | 0.000 | 1.000 |
| 433093 | A8MQ03;                                            | Peptide                  | M/z     | z | q-val | P     |
|        |                                                    | MDPQEMVVKNPYAHISIPR      | 767.044 | 3 | 0.000 | 1.000 |
| 433166 | Q9BSG0;                                            | Peptide                  | M/z     | z | q-val | P     |
|        |                                                    | TADIPALFLLGR             | 643.877 | 2 | 0.000 | 1.000 |
|        |                                                    | TADIPALFLLGR             | 643.877 | 2 | 0.000 | 1.000 |
|        |                                                    | TADIPALFLLGR             | 643.877 | 2 | 0.007 | 0.038 |
|        |                                                    | TADIPALFLLGR             | 643.878 | 2 | 0.000 | 0.998 |
|        |                                                    | TADIPALFLLGR             | 643.877 | 2 | 0.001 | 0.876 |
|        |                                                    | TADIPALFLLGR             | 643.876 | 2 | 0.001 | 0.870 |
|        |                                                    | TADIPALFLLGR             | 643.879 | 2 | 0.002 | 0.371 |
|        |                                                    | TADIPALFLLGR             | 643.877 | 2 | 0.001 | 0.835 |
|        |                                                    | TADIPALFLLGR             | 643.878 | 2 | 0.000 | 0.998 |
|        |                                                    | TADIPALFLLGR             | 643.876 | 2 | 0.002 | 0.427 |
| 433261 | Q6NVU6;                                            | Peptide                  | M/z     | z | q-val | P     |
|        |                                                    | LYSHFAGGGPVMVGGDADAR     | 683.987 | 3 | 0.000 | 1.000 |
|        |                                                    | LYSHFAGGGPVMVGGDADAR     | 683.987 | 3 | 0.000 | 0.983 |
| 433303 | Q8IX33; Q8WUU4;                                    | Peptide                  | M/z     | z | q-val | P     |
|        |                                                    | HFTNSSNLTVHR             | 471.572 | 3 | 0.000 | 1.000 |
|        |                                                    | HFTNSSNLTVHR             | 471.572 | 3 | 0.000 | 1.000 |
| 433492 | E9PIB2; E9PNZ0; E9PQ48; E9PQR9;<br>G3V1A6; P57764; | Peptide                  | M/z     | z | q-val | P     |
|        |                                                    | DILEPDAAEPDVQRGRSFHFY    | 616.299 | 4 | 0.000 | 1.000 |
|        |                                                    | DILEPDAAEPDVQRGRSFHFY    | 616.300 | 4 | 0.000 | 1.000 |
|        |                                                    | DILEPDAAEPDVQRGRSFHFY    | 821.395 | 3 | 0.003 | 0.357 |
| 433661 | Q9H6R6; Q9H6R6-2;                                  | Peptide                  | M/z     | z | q-val | P     |
|        |                                                    | ILDDSFIEGVSR             | 675.845 | 2 | 0.001 | 0.994 |
|        |                                                    | ILDDSFIEGVSR             | 675.851 | 2 | 0.000 | 1.000 |
|        |                                                    | ILDDSFIEGVSR             | 675.849 | 2 | 0.000 | 1.000 |
| 433669 | A6NK88; P49918; P49918-2;                          | Peptide                  | M/z     | z | q-val | P     |
|        |                                                    | SLFGPVDHEELSR            | 495.917 | 3 | 0.006 | 0.574 |
|        |                                                    | SLFGPVDHEELSR            | 495.916 | 3 | 0.000 | 1.000 |

| ID           | Indistinguishable (SameSet) Proteins | Peptide Spectrum Matches |         |       |       |       |
|--------------|--------------------------------------|--------------------------|---------|-------|-------|-------|
| 433674       | Q86XE5;                              | Peptide                  | M/z     | z     | q-val | P     |
|              |                                      | DLSPIPVVLYSVPANTGL       | 928.017 | 2     | 0.000 | 0.998 |
|              |                                      | DLSPIPVVLYSVPANTGL       | 928.016 | 2     | 0.000 | 1.000 |
|              |                                      | DLSPIPVVLYSVPANTGL       | 928.016 | 2     | 0.003 | 0.466 |
| 433794       | E9PAY8; O43688; O43688-2;            | Peptide                  | M/z     | z     | q-val | P     |
|              |                                      | DHNHYGYPHSSS             | 467.526 | 3     | 0.001 | 1.000 |
|              |                                      | DHNHYGYPHSSS             | 467.525 | 3     | 0.001 | 1.000 |
|              |                                      | DHNHYGYPHSSS             | 467.525 | 3     | 0.000 | 0.989 |
|              |                                      | DHNHYGYPHSSS             | 467.526 | 3     | 0.000 | 1.000 |
|              |                                      | DHNHYGYPHSSS             | 467.526 | 3     | 0.000 | 1.000 |
|              |                                      | DHNHYGYPHSSS             | 700.784 | 2     | 0.000 | 0.981 |
|              |                                      | DHNHYGYPHSSS             | 467.526 | 3     | 0.000 | 1.000 |
|              |                                      | DHNHYGYPHSSS             | 700.784 | 2     | 0.000 | 1.000 |
|              |                                      | DHNHYGYPHSSS             | 467.525 | 3     | 0.000 | 1.000 |
|              |                                      | DHNHYGYPHSSS             | 700.782 | 2     | 0.000 | 0.991 |
|              |                                      | DHNHYGYPHSSS             | 467.526 | 3     | 0.000 | 1.000 |
|              |                                      | DHNHYGYPHSSS             | 700.785 | 2     | 0.002 | 0.621 |
|              |                                      | DHNHYGYPHSSS             | 467.525 | 3     | 0.000 | 1.000 |
|              |                                      | DHNHYGYPHSSS             | 700.784 | 2     | 0.000 | 0.991 |
|              |                                      | DHNHYGYPHSSS             | 467.525 | 3     | 0.006 | 0.198 |
|              |                                      | DHNHYGYPHSSS             | 700.785 | 2     | 0.000 | 0.981 |
|              |                                      | DHNHYGYPHSSS             | 467.525 | 3     | 0.000 | 0.990 |
|              |                                      | DHNHYGYPHSSS             | 700.784 | 2     | 0.000 | 1.000 |
|              |                                      | DHNHYGYPHSSS             | 700.783 | 2     | 0.005 | 0.268 |
|              |                                      | DHNHYGYPHSSS             | 700.785 | 2     | 0.000 | 1.000 |
|              |                                      | DHNHYGYPHSSS             | 467.525 | 3     | 0.000 | 1.000 |
| DHNHYGYPHSSS | 700.785                              | 2                        | 0.000   | 1.000 |       |       |
| 433828       | P08913;                              | Peptide                  | M/z     | z     | q-val | P     |
|              |                                      | GPGATGIGTPAAGPGEER       | 797.895 | 2     | 0.000 | 1.000 |
| 433829       | Q8IVE3; Q8IVE3-3;                    | Peptide                  | M/z     | z     | q-val | P     |
|              |                                      | IPNVFSISVALAKR           | 505.641 | 3     | 0.005 | 0.858 |
|              |                                      | IPNVFSISVALAKR           | 505.641 | 3     | 0.000 | 1.000 |
|              |                                      | IPNVFSISVALAKR           | 505.641 | 3     | 0.001 | 0.992 |
|              |                                      | IPNVFSISVALAKR           | 505.640 | 3     | 0.000 | 1.000 |
| 433886       | Q9BU64;                              | Peptide                  | M/z     | z     | q-val | P     |
|              |                                      | MEQANPLRPDGESK           | 815.381 | 2     | 0.000 | 1.000 |

| ID         | Indistinguishable (SameSet) Proteins             | Peptide Spectrum Matches |                   |         |       |       |
|------------|--------------------------------------------------|--------------------------|-------------------|---------|-------|-------|
|            |                                                  | Peptide                  | M/z               | z       | q-val | P     |
| 433976     | Q86VI4; Q86VI4-2; Q86VI4-3;                      | Peptide                  | M/z               | z       | q-val | P     |
|            |                                                  | DDATVNGAAKEPPPPYVSA      | 949.961           | 2       | 0.001 | 1.000 |
|            |                                                  | DDATVNGAAKEPPPPYVSA      | 949.960           | 2       | 0.001 | 1.000 |
|            |                                                  | DDATVNGAAKEPPPPYVSA      | 949.961           | 2       | 0.000 | 1.000 |
|            |                                                  | DDATVNGAAKEPPPPYVSA      | 949.963           | 2       | 0.006 | 0.896 |
|            |                                                  | DDATVNGAAKEPPPPYVSA      | 949.959           | 2       | 0.000 | 0.986 |
|            |                                                  | DDATVNGAAKEPPPPYVSA      | 949.959           | 2       | 0.000 | 0.992 |
|            |                                                  | DDATVNGAAKEPPPPYVSA      | 949.958           | 2       | 0.000 | 0.990 |
|            |                                                  | DDATVNGAAKEPPPPYVSA      | 949.962           | 2       | 0.001 | 0.895 |
|            |                                                  | DDATVNGAAKEPPPPYVSA      | 949.959           | 2       | 0.000 | 1.000 |
|            |                                                  | DDATVNGAAKEPPPPYVSA      | 949.959           | 2       | 0.000 | 0.999 |
|            |                                                  | DDATVNGAAKEPPPPYVSA      | 949.961           | 2       | 0.001 | 0.927 |
|            |                                                  | DDATVNGAAKEPPPPYVSA      | 949.961           | 2       | 0.000 | 1.000 |
|            |                                                  | 434150                   | Q9UGQ3; Q9UGQ3-2; | Peptide | M/z   | z     |
| SLEQIESFFR | 628.319                                          |                          |                   | 2       | 0.001 | 0.997 |
| SLEQIESFFR | 628.318                                          |                          |                   | 2       | 0.000 | 1.000 |
| SLEQIESFFR | 628.321                                          |                          |                   | 2       | 0.003 | 0.496 |
| 434156     | HOYFM8; Q86SQ4; Q86SQ4-2;<br>Q86SQ4-3; Q86SQ4-4; | Peptide                  | M/z               | z       | q-val | P     |
|            |                                                  | DLLESSEALKTI             | 703.375           | 2       | 0.002 | 0.569 |
|            |                                                  | DLLESSEALKTI             | 703.375           | 2       | 0.000 | 1.000 |
| 434352     | Q8N0Y2; Q8N0Y2-2;                                | Peptide                  | M/z               | z       | q-val | P     |
|            |                                                  | KQEPSSPPLAPGLPAFL        | 874.984           | 2       | 0.000 | 1.000 |
|            |                                                  | KQEPSSPPLAPGLPAFL        | 874.985           | 2       | 0.000 | 1.000 |
|            |                                                  | KQEPSSPPLAPGLPAFL        | 874.986           | 2       | 0.002 | 0.439 |
|            |                                                  | KQEPSSPPLAPGLPAFL        | 875.485           | 2       | 0.004 | 0.209 |
|            |                                                  | KQEPSSPPLAPGLPAFL        | 874.982           | 2       | 0.001 | 0.906 |

| ID          | Indistinguishable (Sameset) Proteins | Peptide Spectrum Matches |         |       |       |       |
|-------------|--------------------------------------|--------------------------|---------|-------|-------|-------|
|             |                                      | Peptide                  | M/z     | z     | q-val | P     |
| 434384      | Q2M385;                              | Peptide                  | M/z     | z     | q-val | P     |
|             |                                      | LSGGAAAGVTVGVTTILAVITLA  | 539.575 | 4     | 0.001 | 0.995 |
|             |                                      | LSGGAAAGVTVGVTTILAVITLA  | 431.862 | 5     | 0.000 | 0.997 |
|             |                                      | LSGGAAAGVTVGVTTILAVITLA  | 539.576 | 4     | 0.003 | 0.962 |
|             |                                      | LSGGAAAGVTVGVTTILAVITLA  | 719.098 | 3     | 0.002 | 0.987 |
|             |                                      | LSGGAAAGVTVGVTTILAVITLA  | 539.576 | 4     | 0.001 | 0.996 |
|             |                                      | LSGGAAAGVTVGVTTILAVITLA  | 431.862 | 5     | 0.003 | 0.976 |
|             |                                      | LSGGAAAGVTVGVTTILAVITLA  | 539.575 | 4     | 0.002 | 0.988 |
|             |                                      | LSGGAAAGVTVGVTTILAVITLA  | 539.575 | 4     | 0.000 | 0.997 |
|             |                                      | LSGGAAAGVTVGVTTILAVITLA  | 431.862 | 5     | 0.000 | 1.000 |
|             |                                      | LSGGAAAGVTVGVTTILAVITLA  | 719.097 | 3     | 0.002 | 0.973 |
|             |                                      | LSGGAAAGVTVGVTTILAVITLA  | 539.576 | 4     | 0.003 | 0.934 |
|             |                                      | LSGGAAAGVTVGVTTILAVITLA  | 431.862 | 5     | 0.002 | 0.978 |
|             |                                      | LSGGAAAGVTVGVTTILAVITLA  | 539.576 | 4     | 0.001 | 0.994 |
|             |                                      | LSGGAAAGVTVGVTTILAVITLA  | 719.098 | 3     | 0.004 | 0.903 |
|             |                                      | LSGGAAAGVTVGVTTILAVITLA  | 431.862 | 5     | 0.000 | 1.000 |
|             |                                      | LSGGAAAGVTVGVTTILAVITLA  | 539.576 | 4     | 0.001 | 0.981 |
|             |                                      | LSGGAAAGVTVGVTTILAVITLA  | 539.575 | 4     | 0.001 | 0.988 |
|             |                                      | LSGGAAAGVTVGVTTILAVITLA  | 539.576 | 4     | 0.002 | 0.962 |
|             |                                      | LSGGAAAGVTVGVTTILAVITLA  | 539.577 | 4     | 0.004 | 0.916 |
| 434450      | O76095; O76095-2;                    | Peptide                  | M/z     | z     | q-val | P     |
|             |                                      | TTPECGPTGYVEK            | 719.830 | 2     | 0.001 | 0.892 |
|             |                                      | TTPECGPTGYVEK            | 719.829 | 2     | 0.000 | 0.999 |
|             |                                      | TTPECGPTGYVEK            | 719.830 | 2     | 0.000 | 0.997 |
|             |                                      | TTPECGPTGYVEK            | 719.829 | 2     | 0.000 | 0.999 |
|             |                                      | TTPECGPTGYVEK            | 719.830 | 2     | 0.000 | 1.000 |
|             |                                      | TTPECGPTGYVEK            | 719.813 | 2     | 0.009 | 0.043 |
|             |                                      | TTPECGPTGYVEK            | 719.812 | 2     | 0.009 | 0.041 |
|             |                                      | TTPECGPTGYVEK            | 719.812 | 2     | 0.008 | 0.044 |
|             |                                      | TTPECGPTGYVEK            | 719.812 | 2     | 0.008 | 0.049 |
| 434456      | Q96EF9; Q96K31;                      | Peptide                  | M/z     | z     | q-val | P     |
|             |                                      | ALQEYSSISEK              | 627.814 | 2     | 0.001 | 0.983 |
|             |                                      | ALQEYSSISEK              | 627.817 | 2     | 0.000 | 1.000 |
|             |                                      | ALQEYSSISEK              | 628.314 | 2     | 0.000 | 1.000 |
|             |                                      | ALQEYSSISEK              | 627.815 | 2     | 0.000 | 0.994 |
|             |                                      | ALQEYSSISEK              | 627.815 | 2     | 0.001 | 0.673 |
|             |                                      | ALQEYSSISEK              | 627.814 | 2     | 0.008 | 0.027 |
|             |                                      | ALQEYSSISEK              | 627.814 | 2     | 0.001 | 0.887 |
| ALQEYSSISEK | 627.814                              | 2                        | 0.000   | 0.990 |       |       |

| ID     | Indistinguishable (Sameset) Proteins   | Peptide Spectrum Matches |          |   |       |       |
|--------|----------------------------------------|--------------------------|----------|---|-------|-------|
|        |                                        | Peptide                  | M/z      | z | q-val | P     |
| 434537 | Q5T2W9; Q96HA4; Q96HA4-4;<br>Q96HA4-5; | Peptide                  | M/z      | z | q-val | P     |
|        |                                        | DRATDPAAFPGEARISNV       | 629.651  | 3 | 0.000 | 1.000 |
|        |                                        | DRATDPAAFPGEARISNV       | 629.651  | 3 | 0.000 | 1.000 |
|        |                                        | DRATDPAAFPGEARISNV       | 629.650  | 3 | 0.000 | 1.000 |
|        |                                        | DRATDPAAFPGEARISNV       | 629.651  | 3 | 0.000 | 1.000 |
| 434590 | A8K327; B4E0V4; Q9UQ49;                | Peptide                  | M/z      | z | q-val | P     |
|        |                                        | AEALSTDHGEQFQR           | 506.571  | 3 | 0.000 | 1.000 |
| 434912 | E9PJ29; Q86UD1;                        | Peptide                  | M/z      | z | q-val | P     |
|        |                                        | SYSFDFYVPQR              | 704.831  | 2 | 0.000 | 1.000 |
|        |                                        | SYSFDFYVPQR              | 704.830  | 2 | 0.000 | 1.000 |
| 434930 | Q08629;                                | Peptide                  | M/z      | z | q-val | P     |
|        |                                        | SLLGAFIPR                | 487.295  | 2 | 0.003 | 0.562 |
|        |                                        | SLLGAFIPR                | 487.295  | 2 | 0.000 | 1.000 |
|        |                                        | SLLGAFIPR                | 487.294  | 2 | 0.002 | 0.955 |
|        |                                        | SLLGAFIPR                | 487.296  | 2 | 0.005 | 0.245 |
| 434937 | C9JI05; Q9BRQ8; Q9BRQ8-2;              | Peptide                  | M/z      | z | q-val | P     |
|        |                                        | LAGLHANIAPANIVNSVKQRPL   | 575.339  | 4 | 0.010 | 0.742 |
|        |                                        | LAGLHANIAPANIVNSVKQRPL   | 575.591  | 4 | 0.006 | 0.926 |
|        |                                        | LAGLHANIAPANIVNSVKQRPL   | 575.341  | 4 | 0.000 | 1.000 |
| 435090 | Q9UBY8;                                | Peptide                  | M/z      | z | q-val | P     |
|        |                                        | TQQLLNPVDWNFAQPEAK       | 1050.530 | 2 | 0.002 | 0.403 |
|        |                                        | TQQLLNPVDWNFAQPEAK       | 1050.030 | 2 | 0.001 | 0.715 |
|        |                                        | TQQLLNPVDWNFAQPEAK       | 1050.030 | 2 | 0.000 | 1.000 |
|        |                                        | TQQLLNPVDWNFAQPEAK       | 700.357  | 3 | 0.001 | 0.868 |
| 435161 | B3KR14; P51178;                        | Peptide                  | M/z      | z | q-val | P     |
|        |                                        | VTVEIHGVSER              | 548.809  | 2 | 0.003 | 0.146 |
|        |                                        | VTVEIHGVSER              | 366.209  | 3 | 0.001 | 0.690 |
|        |                                        | VTVEIHGVSER              | 366.209  | 3 | 0.000 | 1.000 |
|        |                                        | VTVEIHGVSER              | 366.208  | 3 | 0.002 | 0.842 |
|        |                                        | VTVEIHGVSER              | 548.808  | 2 | 0.004 | 0.402 |

| ID     | Indistinguishable (Sameset) Proteins                                                                                               | Peptide Spectrum Matches |          |   |       |       |
|--------|------------------------------------------------------------------------------------------------------------------------------------|--------------------------|----------|---|-------|-------|
| 435606 | B4DEM1; P78382; Q5W1L8;                                                                                                            | Peptide                  | M/z      | z | q-val | P     |
|        |                                                                                                                                    | DTTSIQQGETASKERVIGV      | 673.682  | 3 | 0.004 | 0.265 |
|        |                                                                                                                                    | DTTSIQQGETASKERVIGV      | 673.683  | 3 | 0.001 | 0.655 |
|        |                                                                                                                                    | DTTSIQQGETASKERVIGV      | 673.684  | 3 | 0.000 | 1.000 |
|        |                                                                                                                                    | DTTSIQQGETASKERVIGV      | 673.683  | 3 | 0.000 | 1.000 |
|        |                                                                                                                                    | DTTSIQQGETASKERVIGV      | 673.683  | 3 | 0.000 | 1.000 |
|        |                                                                                                                                    | DTTSIQQGETASKERVIGV      | 673.683  | 3 | 0.000 | 1.000 |
|        |                                                                                                                                    | DTTSIQQGETASKERVIGV      | 673.683  | 3 | 0.000 | 1.000 |
|        |                                                                                                                                    | DTTSIQQGETASKERVIGV      | 673.684  | 3 | 0.000 | 0.996 |
|        |                                                                                                                                    | DTTSIQQGETASKERVIGV      | 673.684  | 3 | 0.000 | 0.992 |
|        |                                                                                                                                    | DTTSIQQGETASKERVIGV      | 673.683  | 3 | 0.000 | 1.000 |
|        |                                                                                                                                    | DTTSIQQGETASKERVIGV      | 673.684  | 3 | 0.002 | 0.725 |
|        |                                                                                                                                    | DTTSIQQGETASKERVIGV      | 673.684  | 3 | 0.001 | 0.854 |
|        |                                                                                                                                    | DTTSIQQGETASKERVIGV      | 1009.520 | 2 | 0.001 | 0.916 |
|        |                                                                                                                                    | DTTSIQQGETASKERVIGV      | 1010.020 | 2 | 0.000 | 1.000 |
|        |                                                                                                                                    | DTTSIQQGETASKERVIGV      | 674.019  | 3 | 0.001 | 0.943 |
| 435695 | F8VRX7; F8VUX5; F8VX10; F8VXI8;<br>G3V1X4; H0YID1; H0YIQ8; Q9H9L4;<br>Q9H9L4-4;                                                    | Peptide                  | M/z      | z | q-val | P     |
|        |                                                                                                                                    | NALALHAQMK               | 556.798  | 2 | 0.001 | 0.982 |
|        |                                                                                                                                    | NALALHAQMK               | 556.798  | 2 | 0.001 | 0.934 |
|        |                                                                                                                                    | NALALHAQMK               | 556.798  | 2 | 0.000 | 1.000 |
|        |                                                                                                                                    | NALALHAQMK               | 556.799  | 2 | 0.007 | 0.035 |
| 435737 | Q9H9D4;                                                                                                                            | Peptide                  | M/z      | z | q-val | P     |
|        |                                                                                                                                    | SYSSEESFK                | 532.233  | 2 | 0.010 | 0.027 |
|        |                                                                                                                                    | SYSSEESFK                | 532.233  | 2 | 0.001 | 0.962 |
|        |                                                                                                                                    | SYSSEESFK                | 532.232  | 2 | 0.001 | 0.929 |
|        |                                                                                                                                    | SYSSEESFK                | 532.232  | 2 | 0.000 | 0.996 |
|        |                                                                                                                                    | SYSSEESFK                | 532.234  | 2 | 0.000 | 1.000 |
| 435760 | A8MW34; C9J1H4; C9J1H5; E9PJ71;<br>E9PN24; E9PNE4; F8VX18; F8VZS6;<br>Q2MV58; Q2MV58-2; Q2MV58-3;<br>Q2MV58-4; Q2MV58-5; Q2MV58-6; | Peptide                  | M/z      | z | q-val | P     |
|        |                                                                                                                                    | DIPTAAKYEYGVPLQTS        | 926.972  | 2 | 0.000 | 1.000 |
| 435804 | P80075;                                                                                                                            | Peptide                  | M/z      | z | q-val | P     |
|        |                                                                                                                                    | DQIFQNLKP                | 551.799  | 2 | 0.001 | 0.891 |
|        |                                                                                                                                    | DQIFQNLKP                | 551.798  | 2 | 0.001 | 0.936 |
|        |                                                                                                                                    | DQIFQNLKP                | 551.798  | 2 | 0.007 | 0.152 |
|        |                                                                                                                                    | DQIFQNLKP                | 551.799  | 2 | 0.004 | 0.303 |
|        |                                                                                                                                    | DQIFQNLKP                | 551.798  | 2 | 0.000 | 0.977 |
|        |                                                                                                                                    | DQIFQNLKP                | 551.799  | 2 | 0.000 | 1.000 |
|        |                                                                                                                                    | DQIFQNLKP                | 551.798  | 2 | 0.000 | 1.000 |
|        |                                                                                                                                    | DQIFQNLKP                | 551.798  | 2 | 0.000 | 1.000 |
|        |                                                                                                                                    | DQIFQNLKP                | 551.798  | 2 | 0.000 | 1.000 |

| ID     | Indistinguishable (Sameset) Proteins           | Peptide Spectrum Matches              |          |   |       |       |
|--------|------------------------------------------------|---------------------------------------|----------|---|-------|-------|
|        |                                                | Peptide                               | M/z      | z | q-val | P     |
| 435987 | E7EV90; E9PBU9; Q5BKX6; Q5BKX6-2;<br>Q5BKX6-3; | Peptide                               | M/z      | z | q-val | P     |
|        |                                                | EAAKEDETLLDNHLNEAK                    | 681.002  | 3 | 0.000 | 1.000 |
| 436073 | Q9NWD8;                                        | Peptide                               | M/z      | z | q-val | P     |
|        |                                                | DANTKYAQ                              | 455.717  | 2 | 0.008 | 0.368 |
|        |                                                | DANTKYAQ                              | 455.718  | 2 | 0.000 | 0.987 |
|        |                                                | DANTKYAQ                              | 455.717  | 2 | 0.000 | 1.000 |
|        |                                                | DANTKYAQ                              | 455.717  | 2 | 0.000 | 0.991 |
|        |                                                | DANTKYAQ                              | 455.224  | 2 | 0.006 | 0.199 |
| 436095 | Q13103;                                        | Peptide                               | M/z      | z | q-val | P     |
|        |                                                | VNSQSLSPYLFR                          | 705.871  | 2 | 0.000 | 0.999 |
|        |                                                | VNSQSLSPYLFR                          | 705.873  | 2 | 0.001 | 0.980 |
|        |                                                | VNSQSLSPYLFR                          | 705.873  | 2 | 0.001 | 0.997 |
|        |                                                | VNSQSLSPYLFR                          | 705.873  | 2 | 0.001 | 0.990 |
|        |                                                | VNSQSLSPYLFR                          | 705.872  | 2 | 0.000 | 1.000 |
|        |                                                | VNSQSLSPYLFR                          | 705.872  | 2 | 0.000 | 1.000 |
|        |                                                | VNSQSLSPYLFR                          | 705.872  | 2 | 0.000 | 1.000 |
|        |                                                | VNSQSLSPYLFR                          | 705.872  | 2 | 0.000 | 1.000 |
|        |                                                | VNSQSLSPYLFR                          | 705.872  | 2 | 0.000 | 1.000 |
|        |                                                | VNSQSLSPYLFR                          | 705.874  | 2 | 0.000 | 1.000 |
|        |                                                | VNSQSLSPYLFR                          | 705.872  | 2 | 0.000 | 1.000 |
|        |                                                | VNSQSLSPYLFR                          | 705.872  | 2 | 0.000 | 1.000 |
|        |                                                | VNSQSLSPYLFR                          | 705.872  | 2 | 0.000 | 0.998 |
| 436106 | Q5JZH3; Q5JZH4; Q5JZH5; Q5JZH7;<br>Q969T3;     | Peptide                               | M/z      | z | q-val | P     |
|        |                                                | HALAGDGPGEAAASPEAEQFPESSELEDDDAEGLSSR | 1247.880 | 3 | 0.000 | 0.992 |
|        |                                                | HALAGDGPGEAAASPEAEQFPESSELEDDDAEGLSSR | 1247.880 | 3 | 0.000 | 1.000 |
|        |                                                | HALAGDGPGEAAASPEAEQFPESSELEDDDAEGLSSR | 1247.880 | 3 | 0.000 | 1.000 |
| 436156 | E9PH34; Q13761; Q13761-2;                      | Peptide                               | M/z      | z | q-val | P     |
|        |                                                | SMVDVLADHAGELVR                       | 537.945  | 3 | 0.000 | 1.000 |



| ID     | Indistinguishable (SameSet) Proteins | Peptide Spectrum Matches |         |   |       |       |
|--------|--------------------------------------|--------------------------|---------|---|-------|-------|
| 436402 | B4DLC3; O95832;                      | Peptide                  | M/z     | z | q-val | P     |
|        |                                      | FYDPMTPVNARYE            | 809.867 | 2 | 0.000 | 1.000 |
|        |                                      | FYDPMTPVNARYE            | 809.865 | 2 | 0.000 | 1.000 |
|        |                                      | FYDPMTPVNARYE            | 809.863 | 2 | 0.000 | 1.000 |
|        |                                      | FYDPMTPVNARYE            | 809.864 | 2 | 0.001 | 0.999 |
|        |                                      | FYDPMTPVNARYE            | 809.864 | 2 | 0.000 | 1.000 |
|        |                                      | FYDPMTPVNARYE            | 809.865 | 2 | 0.000 | 1.000 |
|        |                                      | FYDPMTPVNARYE            | 809.865 | 2 | 0.000 | 1.000 |
|        |                                      | FYDPMTPVNARYE            | 809.865 | 2 | 0.000 | 1.000 |
|        |                                      | FYDPMTPVNARYE            | 809.865 | 2 | 0.000 | 1.000 |
|        |                                      | FYDPMTPVNARYE            | 809.864 | 2 | 0.000 | 1.000 |
|        |                                      | FYDPMTPVNARYE            | 809.865 | 2 | 0.000 | 1.000 |
|        |                                      | FYDPMTPVNARYE            | 809.866 | 2 | 0.000 | 1.000 |
|        |                                      | FYDPMTPVNARYE            | 809.865 | 2 | 0.000 | 1.000 |
|        |                                      | FYDPMTPVNARYE            | 809.865 | 2 | 0.000 | 1.000 |
|        |                                      | FYDPMTPVNARYE            | 809.865 | 2 | 0.000 | 1.000 |
|        |                                      | FYDPMTPVNARYE            | 809.865 | 2 | 0.000 | 1.000 |
|        |                                      | FYDPMTPVNARYE            | 809.865 | 2 | 0.000 | 1.000 |
|        |                                      | FYDPMTPVNARYE            | 809.865 | 2 | 0.000 | 1.000 |
|        |                                      | FYDPMTPVNARYE            | 809.864 | 2 | 0.000 | 1.000 |
|        |                                      | FYDPMTPVNARYE            | 809.865 | 2 | 0.000 | 1.000 |
|        |                                      | FYDPMTPVNARYE            | 809.865 | 2 | 0.000 | 1.000 |
|        |                                      | FYDPMTPVNARYE            | 809.863 | 2 | 0.001 | 0.999 |
|        |                                      | FYDPMTPVNARYE            | 809.863 | 2 | 0.001 | 0.998 |
|        |                                      | FYDPMTPVNARYE            | 809.862 | 2 | 0.002 | 0.994 |
|        |                                      | FYDPMTPVNARYE            | 809.863 | 2 | 0.001 | 1.000 |
|        |                                      | FYDPMTPVNARYE            | 809.863 | 2 | 0.007 | 0.559 |
|        |                                      | FYDPMTPVNARYE            | 809.864 | 2 | 0.002 | 0.993 |
|        |                                      | FYDPMTPVNARYE            | 809.863 | 2 | 0.004 | 0.887 |
|        |                                      | FYDPMTPVNARYE            | 809.863 | 2 | 0.002 | 0.993 |
|        |                                      | FYDPMTPVNARYE            | 809.863 | 2 | 0.001 | 1.000 |
|        |                                      | FYDPMTPVNARYE            | 809.865 | 2 | 0.001 | 1.000 |
|        |                                      | FYDPMTPVNARYE            | 809.863 | 2 | 0.001 | 1.000 |
|        |                                      | FYDPMTPVNARYE            | 809.863 | 2 | 0.001 | 1.000 |
|        |                                      | FYDPMTPVNARYE            | 809.864 | 2 | 0.001 | 1.000 |
| 436420 | Q96KR6;                              | Peptide                  | M/z     | z | q-val | P     |
|        |                                      | ISITLVSVPLIVR            | 705.457 | 2 | 0.000 | 1.000 |
|        |                                      | ISITLVSVPLIVR            | 705.458 | 2 | 0.001 | 0.978 |

| ID     | Indistinguishable (SameSet) Proteins              | Peptide Spectrum Matches              |          |   |       |       |
|--------|---------------------------------------------------|---------------------------------------|----------|---|-------|-------|
| 436505 | P18847; P18847-2; Q5VTZ2; Q5VTZ4; Q7Z566; Q8WYM6; | Peptide                               | M/z      | z | q-val | P     |
|        |                                                   | AEVAPEEDER                            | 572.762  | 2 | 0.000 | 1.000 |
|        |                                                   | AEVAPEEDER                            | 572.759  | 2 | 0.001 | 0.851 |
|        |                                                   | AEVAPEEDER                            | 572.759  | 2 | 0.001 | 0.735 |
|        |                                                   | AEVAPEEDER                            | 572.761  | 2 | 0.000 | 0.992 |
|        |                                                   | AEVAPEEDER                            | 572.761  | 2 | 0.002 | 0.319 |
|        |                                                   | AEVAPEEDER                            | 572.760  | 2 | 0.000 | 1.000 |
|        |                                                   | AEVAPEEDER                            | 572.759  | 2 | 0.001 | 0.701 |
| 436566 | Q9H0Q3;                                           | Peptide                               | M/z      | z | q-val | P     |
|        |                                                   | APGDEEAQVENLITANATEPQKAEN             | 1320.120 | 2 | 0.000 | 1.000 |
|        |                                                   | APGDEEAQVENLITANATEPQKAEN             | 880.418  | 3 | 0.000 | 1.000 |
|        |                                                   | APGDEEAQVENLITANATEPQKAEN             | 880.419  | 3 | 0.000 | 1.000 |
|        |                                                   | APGDEEAQVENLITANATEPQKAEN             | 880.419  | 3 | 0.000 | 1.000 |
| 436591 | Q7Z5S9;                                           | Peptide                               | M/z      | z | q-val | P     |
|        |                                                   | DTTPLITEHVINTTQ                       | 841.933  | 2 | 0.000 | 1.000 |
|        |                                                   | DTTPLITEHVINTTQ                       | 841.934  | 2 | 0.000 | 1.000 |
| 436633 | Q9H2X8;                                           | Peptide                               | M/z      | z | q-val | P     |
|        |                                                   | DEARENVPQGEPKPKPLKSEKHEE              | 548.876  | 5 | 0.000 | 1.000 |
|        |                                                   | DEARENVPQGEPKPKPLKSEKHEE              | 548.878  | 5 | 0.000 | 1.000 |
|        |                                                   | DEARENVPQGEPKPKPLKSEKHEE              | 457.565  | 6 | 0.007 | 0.148 |
|        |                                                   | DEARENVPQGEPKPKPLKSEKHEE              | 685.844  | 4 | 0.000 | 1.000 |
|        |                                                   | DEARENVPQGEPKPKPLKSEKHEE              | 685.845  | 4 | 0.000 | 1.000 |
|        |                                                   | DEARENVPQGEPKPKPLKSEKHEE              | 685.843  | 4 | 0.000 | 1.000 |
| 436692 | POC6T2;                                           | Peptide                               | M/z      | z | q-val | P     |
|        |                                                   | MITDVQLAIFANMLGVSLFLLVVLYHYVAVNNPKKQE | 1049.080 | 4 | 0.005 | 0.523 |
|        |                                                   | MITDVQLAIFANMLGVSLFLLVVLYHYVAVNNPKKQE | 1048.580 | 4 | 0.000 | 1.000 |
|        |                                                   | MITDVQLAIFANMLGVSLFLLVVLYHYVAVNNPKKQE | 1048.830 | 4 | 0.000 | 1.000 |
|        |                                                   | MITDVQLAIFANMLGVSLFLLVVLYHYVAVNNPKKQE | 1056.820 | 4 | 0.000 | 1.000 |
|        |                                                   | MITDVQLAIFANMLGVSLFLLVVLYHYVAVNNPKKQE | 1056.570 | 4 | 0.000 | 1.000 |
|        |                                                   | MITDVQLAIFANMLGVSLFLLVVLYHYVAVNNPKKQE | 1056.820 | 4 | 0.000 | 1.000 |
|        |                                                   | MITDVQLAIFANMLGVSLFLLVVLYHYVAVNNPKKQE | 1057.080 | 4 | 0.000 | 1.000 |
|        |                                                   | MITDVQLAIFANMLGVSLFLLVVLYHYVAVNNPKKQE | 1056.570 | 4 | 0.004 | 0.925 |
| 436703 | B4DJ67; E7EPY8; G3V175; H0YEG4; O15374; Q8WU09;   | Peptide                               | M/z      | z | q-val | P     |
|        |                                                   | AIFAGGYLALILPVLVLCRNS                 | 792.440  | 3 | 0.003 | 0.941 |
|        |                                                   | AIFAGGYLALILPVLVLCRNS                 | 792.440  | 3 | 0.002 | 0.966 |
|        |                                                   | AIFAGGYLALILPVLVLCRNS                 | 792.440  | 3 | 0.006 | 0.675 |
|        |                                                   | AIFAGGYLALILPVLVLCRNS                 | 792.441  | 3 | 0.001 | 0.997 |
|        |                                                   | AIFAGGYLALILPVLVLCRNS                 | 792.441  | 3 | 0.006 | 0.156 |
|        |                                                   | AIFAGGYLALILPVLVLCRNS                 | 792.441  | 3 | 0.000 | 1.000 |

| ID     | Indistinguishable (SameSet) Proteins | Peptide Spectrum Matches    |         |   |       |       |
|--------|--------------------------------------|-----------------------------|---------|---|-------|-------|
|        |                                      | Peptide                     | M/z     | z | q-val | P     |
| 436707 | Q5T686;                              | Peptide                     | M/z     | z | q-val | P     |
|        |                                      | ILEPHSALANPQSATETASSEQYLHSR | 735.114 | 4 | 0.000 | 1.000 |
| 436744 | Q8TC26;                              | Peptide                     | M/z     | z | q-val | P     |
|        |                                      | ISESGQFSDGLEDR              | 770.850 | 2 | 0.000 | 1.000 |
| 436754 | Q9UK33;                              | Peptide                     | M/z     | z | q-val | P     |
|        |                                      | DAAELAQHVMLH                | 453.908 | 3 | 0.000 | 0.998 |
|        |                                      | DAAELAQHVMLH                | 453.909 | 3 | 0.001 | 0.965 |
|        |                                      | DAAELAQHVMLH                | 453.909 | 3 | 0.000 | 1.000 |
|        |                                      | DAAELAQHVMLH                | 453.909 | 3 | 0.000 | 1.000 |
|        |                                      | DAAELAQHVMLH                | 453.909 | 3 | 0.000 | 1.000 |

| ID     | Indistinguishable (SameSet) Proteins | Peptide Spectrum Matches |         |   |       |       |
|--------|--------------------------------------|--------------------------|---------|---|-------|-------|
| 436903 | G3V1C1; Q96JD6; Q96JD6-4;            | Peptide                  | M/z     | z | q-val | P     |
|        |                                      | SPAQILIR                 | 449.276 | 2 | 0.000 | 0.999 |
|        |                                      | SPAQILIR                 | 449.280 | 2 | 0.000 | 1.000 |
|        |                                      | SPAQILIR                 | 449.279 | 2 | 0.000 | 1.000 |
|        |                                      | SPAQILIR                 | 449.279 | 2 | 0.000 | 1.000 |
|        |                                      | SPAQILIR                 | 449.280 | 2 | 0.000 | 1.000 |
|        |                                      | SPAQILIR                 | 449.280 | 2 | 0.000 | 1.000 |
|        |                                      | SPAQILIR                 | 449.279 | 2 | 0.001 | 0.998 |
|        |                                      | SPAQILIR                 | 449.279 | 2 | 0.001 | 0.993 |
|        |                                      | SPAQILIR                 | 449.280 | 2 | 0.001 | 0.997 |
|        |                                      | SPAQILIR                 | 449.279 | 2 | 0.000 | 0.999 |
|        |                                      | SPAQILIR                 | 449.279 | 2 | 0.003 | 0.972 |
|        |                                      | SPAQILIR                 | 449.280 | 2 | 0.000 | 1.000 |
|        |                                      | SPAQILIR                 | 449.279 | 2 | 0.001 | 0.999 |
|        |                                      | SPAQILIR                 | 449.280 | 2 | 0.000 | 1.000 |
|        |                                      | SPAQILIR                 | 449.280 | 2 | 0.000 | 0.999 |
|        |                                      | SPAQILIR                 | 449.279 | 2 | 0.000 | 1.000 |
|        |                                      | SPAQILIR                 | 449.280 | 2 | 0.000 | 1.000 |
|        |                                      | SPAQILIR                 | 449.279 | 2 | 0.001 | 0.999 |
|        |                                      | SPAQILIR                 | 449.279 | 2 | 0.000 | 1.000 |
|        |                                      | SPAQILIR                 | 449.279 | 2 | 0.000 | 1.000 |
|        |                                      | SPAQILIR                 | 449.280 | 2 | 0.001 | 0.996 |
|        |                                      | SPAQILIR                 | 449.279 | 2 | 0.000 | 0.999 |
|        |                                      | SPAQILIR                 | 449.278 | 2 | 0.002 | 0.959 |
|        |                                      | SPAQILIR                 | 449.279 | 2 | 0.003 | 0.895 |
|        |                                      | SPAQILIR                 | 449.280 | 2 | 0.008 | 0.484 |
|        |                                      | SPAQILIR                 | 449.279 | 2 | 0.000 | 1.000 |
|        |                                      | SPAQILIR                 | 449.280 | 2 | 0.000 | 0.997 |
|        |                                      | SPAQILIR                 | 449.279 | 2 | 0.000 | 1.000 |
|        |                                      | SPAQILIR                 | 449.280 | 2 | 0.000 | 1.000 |
|        |                                      | SPAQILIR                 | 449.280 | 2 | 0.001 | 0.998 |
|        |                                      | SPAQILIR                 | 449.280 | 2 | 0.000 | 1.000 |
|        |                                      | SPAQILIR                 | 449.280 | 2 | 0.000 | 1.000 |
|        |                                      | SPAQILIR                 | 449.280 | 2 | 0.000 | 1.000 |
|        |                                      | SPAQILIR                 | 449.280 | 2 | 0.000 | 1.000 |
|        |                                      | SPAQILIR                 | 450.288 | 2 | 0.000 | 0.998 |
|        |                                      | SPAQILIR                 | 449.280 | 2 | 0.000 | 0.999 |
|        |                                      | SPAQILIR                 | 449.281 | 2 | 0.000 | 1.000 |
|        |                                      | SPAQILIR                 | 449.281 | 2 | 0.000 | 0.999 |
|        |                                      | SPAQILIR                 | 449.279 | 2 | 0.000 | 1.000 |
|        |                                      | SPAQILIR                 | 449.279 | 2 | 0.000 | 0.999 |

| ID     | Indistinguishable (SameSet) Proteins | Peptide Spectrum Matches |         |   |       |       |
|--------|--------------------------------------|--------------------------|---------|---|-------|-------|
|        |                                      | Peptide                  | M/z     | z | q-val | P     |
|        |                                      | SPAQILIR                 | 449.279 | 2 | 0.000 | 1.000 |
|        |                                      | SPAQILIR                 | 449.279 | 2 | 0.000 | 1.000 |
|        |                                      | SPAQILIR                 | 449.279 | 2 | 0.000 | 1.000 |
|        |                                      | SPAQILIR                 | 449.279 | 2 | 0.000 | 1.000 |
|        |                                      | SPAQILIR                 | 449.279 | 2 | 0.000 | 1.000 |
|        |                                      | SPAQILIR                 | 449.279 | 2 | 0.000 | 1.000 |
|        |                                      | SPAQILIR                 | 449.279 | 2 | 0.000 | 1.000 |
|        |                                      | SPAQILIR                 | 449.279 | 2 | 0.000 | 1.000 |
|        |                                      | SPAQILIR                 | 449.279 | 2 | 0.000 | 1.000 |
|        |                                      | SPAQILIR                 | 449.279 | 2 | 0.000 | 0.999 |
|        |                                      | SPAQILIR                 | 450.282 | 2 | 0.002 | 0.768 |
|        |                                      | SPAQILIR                 | 449.279 | 2 | 0.000 | 1.000 |
|        |                                      | SPAQILIR                 | 449.279 | 2 | 0.000 | 1.000 |
|        |                                      | SPAQILIR                 | 449.279 | 2 | 0.001 | 0.978 |
|        |                                      | SPAQILIR                 | 449.280 | 2 | 0.000 | 1.000 |
|        |                                      | SPAQILIR                 | 449.280 | 2 | 0.000 | 1.000 |
|        |                                      | SPAQILIR                 | 449.280 | 2 | 0.001 | 0.970 |
|        |                                      | SPAQILIR                 | 449.279 | 2 | 0.000 | 0.998 |
|        |                                      | SPAQILIR                 | 449.279 | 2 | 0.000 | 0.999 |
| 437073 | Q68CL5; Q68CL5-3;                    | Peptide                  | M/z     | z | q-val | P     |
|        |                                      | DLEDDTHEAS               | 566.225 | 2 | 0.000 | 1.000 |
| 437125 | Q9BVM4;                              | Peptide                  | M/z     | z | q-val | P     |
|        |                                      | LVEGEVYAVDER             | 689.847 | 2 | 0.000 | 1.000 |
|        |                                      | LVEGEVYAVDER             | 689.846 | 2 | 0.000 | 1.000 |
|        |                                      | LVEGEVYAVDER             | 689.847 | 2 | 0.000 | 1.000 |
|        |                                      | LVEGEVYAVDER             | 689.848 | 2 | 0.001 | 0.975 |
|        |                                      | LVEGEVYAVDER             | 689.846 | 2 | 0.001 | 0.541 |
|        |                                      | LVEGEVYAVDER             | 689.847 | 2 | 0.000 | 1.000 |
|        |                                      | LVEGEVYAVDER             | 689.846 | 2 | 0.000 | 1.000 |
| 437274 | Q14201; Q14201-2;                    | Peptide                  | M/z     | z | q-val | P     |
|        |                                      | FQRVDPDVLK               | 405.881 | 3 | 0.006 | 0.053 |
|        |                                      | FQRVDPDVLK               | 406.241 | 3 | 0.003 | 0.227 |
|        |                                      | FQRVDPDVLK               | 406.241 | 3 | 0.004 | 0.110 |
|        |                                      | FQRVDPDVLK               | 406.228 | 3 | 0.001 | 0.731 |
|        |                                      | FQRVDPDVLK               | 406.228 | 3 | 0.000 | 1.000 |
|        |                                      | FQRVDPDVLK               | 406.227 | 3 | 0.001 | 0.517 |
|        |                                      | FQRVDPDVLK               | 406.227 | 3 | 0.005 | 0.099 |

| ID     | Indistinguishable (Sameset) Proteins | Peptide Spectrum Matches           |          |   |       |       |
|--------|--------------------------------------|------------------------------------|----------|---|-------|-------|
| 437311 | F5H1X7; Q96A37; Q96A37-2;            | Peptide                            | M/z      | z | q-val | P     |
|        |                                      | FVPVVPTSQPIPSNIPNR                 | 654.698  | 3 | 0.001 | 0.804 |
|        |                                      | FVPVVPTSQPIPSNIPNR                 | 654.698  | 3 | 0.000 | 1.000 |
|        |                                      | FVPVVPTSQPIPSNIPNR                 | 654.699  | 3 | 0.001 | 0.797 |
|        |                                      | FVPVVPTSQPIPSNIPNR                 | 654.698  | 3 | 0.001 | 0.978 |
|        |                                      | FVPVVPTSQPIPSNIPNR                 | 654.699  | 3 | 0.001 | 0.986 |
|        |                                      | FVPVVPTSQPIPSNIPNR                 | 981.545  | 2 | 0.000 | 1.000 |
|        |                                      | FVPVVPTSQPIPSNIPNR                 | 981.545  | 2 | 0.002 | 0.324 |
| 437610 | Q9Y225; Q9Y225-2;                    | Peptide                            | M/z      | z | q-val | P     |
|        |                                      | DRGPPQGPLPGAENIV                   | 539.617  | 3 | 0.001 | 0.942 |
|        |                                      | DRGPPQGPLPGAENIV                   | 539.619  | 3 | 0.000 | 1.000 |
|        |                                      | DRGPPQGPLPGAENIV                   | 808.924  | 2 | 0.000 | 0.981 |
|        |                                      | DRGPPQGPLPGAENIV                   | 808.922  | 2 | 0.000 | 0.998 |
|        |                                      | DRGPPQGPLPGAENIV                   | 808.921  | 2 | 0.000 | 0.996 |
|        |                                      | DRGPPQGPLPGAENIV                   | 539.618  | 3 | 0.000 | 0.996 |
|        |                                      | DRGPPQGPLPGAENIV                   | 808.924  | 2 | 0.000 | 1.000 |
|        |                                      | DRGPPQGPLPGAENIV                   | 808.923  | 2 | 0.003 | 0.325 |
|        |                                      | DRGPPQGPLPGAENIV                   | 808.923  | 2 | 0.000 | 1.000 |
|        |                                      | DRGPPQGPLPGAENIV                   | 539.618  | 3 | 0.001 | 0.925 |
|        |                                      | DRGPPQGPLPGAENIV                   | 808.924  | 2 | 0.000 | 1.000 |
|        |                                      | DRGPPQGPLPGAENIV                   | 808.924  | 2 | 0.000 | 1.000 |
|        |                                      | DRGPPQGPLPGAENIV                   | 808.924  | 2 | 0.000 | 1.000 |
| 437634 | G3V225; G3V2B4;                      | Peptide                            | M/z      | z | q-val | P     |
|        |                                      | DLEDFFSAVGK                        | 614.302  | 2 | 0.004 | 0.844 |
|        |                                      | DLEDFFSAVGK                        | 614.299  | 2 | 0.000 | 1.000 |
|        |                                      | DLEDFFSAVGK                        | 614.297  | 2 | 0.000 | 1.000 |
|        |                                      | DLEDFFSAVGK                        | 614.296  | 2 | 0.000 | 1.000 |
|        |                                      | DLEDFFSAVGK                        | 614.299  | 2 | 0.000 | 1.000 |
|        |                                      | DLEDFFSAVGK                        | 614.300  | 2 | 0.001 | 0.979 |
| 437719 | Q8IYN2;                              | Peptide                            | M/z      | z | q-val | P     |
|        |                                      | AEEDRPLEDVPQEAEGNPQPSEEGVSQEAEGNPR | 923.166  | 4 | 0.000 | 1.000 |
|        |                                      | AEEDRPLEDVPQEAEGNPQPSEEGVSQEAEGNPR | 922.916  | 4 | 0.003 | 0.251 |
|        |                                      | AEEDRPLEDVPQEAEGNPQPSEEGVSQEAEGNPR | 1230.560 | 3 | 0.000 | 1.000 |
|        |                                      | AEEDRPLEDVPQEAEGNPQPSEEGVSQEAEGNPR | 923.166  | 4 | 0.000 | 1.000 |
|        |                                      | AEEDRPLEDVPQEAEGNPQPSEEGVSQEAEGNPR | 923.166  | 4 | 0.000 | 1.000 |
|        |                                      | AEEDRPLEDVPQEAEGNPQPSEEGVSQEAEGNPR | 923.417  | 4 | 0.000 | 1.000 |
| 437751 | Q9UJG1; Q9UJG1-2; Q9UJG1-3;          | Peptide                            | M/z      | z | q-val | P     |
|        |                                      | EVVATLLPSAK                        | 564.338  | 2 | 0.000 | 0.999 |
|        |                                      | EVVATLLPSAK                        | 564.337  | 2 | 0.000 | 1.000 |

| ID     | Indistinguishable (Sameset) Proteins                        | Peptide Spectrum Matches |         |   |       |       |
|--------|-------------------------------------------------------------|--------------------------|---------|---|-------|-------|
|        |                                                             | Peptide                  | M/z     | z | q-val | P     |
| 438126 | E7EMF7; E9PFZ8; Q66K89;                                     | ISHASDLVGGGHIKEVIVAAE    | 421.632 | 5 | 0.001 | 1.000 |
| 438342 | A6NEP9; Q8NG11; Q8NG11-2;                                   | SYRDDIDLQNLIDSLQK        | 679.347 | 3 | 0.000 | 1.000 |
|        |                                                             | SYRDDIDLQNLIDSLQK        | 679.350 | 3 | 0.000 | 0.995 |
| 438451 | B4DF08; B4DZ66; B7WPA5; B8ZZN1; Q96CS7; Q96CS7-2; Q96CS7-3; | DDQTRQNIE                | 559.759 | 2 | 0.002 | 0.989 |
|        |                                                             | DDQTRQNIE                | 559.758 | 2 | 0.000 | 1.000 |
|        |                                                             | DDQTRQNIE                | 559.757 | 2 | 0.007 | 0.149 |
| 438550 | Q96IK5;                                                     | AEQDSEVGPQEINKEELEGNSMR  | 869.062 | 3 | 0.000 | 1.000 |
| 438573 | Q6NUP7;                                                     | NIPISVPGPSSVTPSTSK       | 884.980 | 2 | 0.000 | 1.000 |
| 438729 | Q9UHF1;                                                     | VAPNPTGVDSAMKEEVQR       | 648.654 | 3 | 0.000 | 1.000 |
|        |                                                             | VAPNPTGVDSAMKEEVQR       | 648.654 | 3 | 0.001 | 0.919 |
| 438755 | Q719H9;                                                     | DKSLIEEVFPEIG            | 738.385 | 2 | 0.000 | 1.000 |
|        |                                                             | DKSLIEEVFPEIG            | 738.386 | 2 | 0.000 | 1.000 |
|        |                                                             | DKSLIEEVFPEIG            | 738.385 | 2 | 0.000 | 1.000 |
|        |                                                             | DKSLIEEVFPEIG            | 738.385 | 2 | 0.000 | 0.995 |
|        |                                                             | DKSLIEEVFPEIG            | 738.886 | 2 | 0.004 | 0.354 |
| 438820 | B7Z969; Q9UGQ2; Q9UGQ2-2;                                   | DEEKLAETLEGEL            | 737.863 | 2 | 0.001 | 0.947 |
|        |                                                             | DEEKLAETLEGEL            | 738.359 | 2 | 0.000 | 1.000 |
| 438840 | Q7Z2X4; Q7Z2X4-2; Q7Z2X4-3; Q7Z2X4-4;                       | DGRIHSNNSSEEVSQELESDDG   | 793.004 | 3 | 0.006 | 0.181 |
|        |                                                             | DGRIHSNNSSEEVSQELESDDG   | 793.007 | 3 | 0.000 | 1.000 |
|        |                                                             | DGRIHSNNSSEEVSQELESDDG   | 793.006 | 3 | 0.000 | 1.000 |
|        |                                                             | DGRIHSNNSSEEVSQELESDDG   | 793.004 | 3 | 0.000 | 1.000 |
|        |                                                             | DGRIHSNNSSEEVSQELESDDG   | 793.007 | 3 | 0.000 | 1.000 |
|        |                                                             | DGRIHSNNSSEEVSQELESDDG   | 793.007 | 3 | 0.000 | 1.000 |
|        |                                                             | DGRIHSNNSSEEVSQELESDDG   | 793.006 | 3 | 0.000 | 1.000 |
|        |                                                             | DGRIHSNNSSEEVSQELESDDG   | 793.006 | 3 | 0.000 | 1.000 |
|        |                                                             | DGRIHSNNSSEEVSQELESDDG   | 793.338 | 3 | 0.005 | 0.235 |

| ID     | Indistinguishable (SameSet) Proteins   | Peptide Spectrum Matches                 |          |   |       |       |
|--------|----------------------------------------|------------------------------------------|----------|---|-------|-------|
| 438886 | H0Y175; Q6J4K2; Q6J4K2-2;              | Peptide                                  | M/z      | z | q-val | P     |
|        |                                        | DSEEDRVSSNTNSY                           | 801.829  | 2 | 0.000 | 0.986 |
|        |                                        | DSEEDRVSSNTNSY                           | 801.829  | 2 | 0.000 | 0.999 |
|        |                                        | DSEEDRVSSNTNSY                           | 801.829  | 2 | 0.000 | 0.999 |
|        |                                        | DSEEDRVSSNTNSY                           | 801.829  | 2 | 0.002 | 0.766 |
|        |                                        | DSEEDRVSSNTNSY                           | 801.829  | 2 | 0.000 | 1.000 |
|        |                                        | DSEEDRVSSNTNSY                           | 801.830  | 2 | 0.000 | 1.000 |
|        |                                        | DSEEDRVSSNTNSY                           | 802.332  | 2 | 0.003 | 0.544 |
|        |                                        | DSEEDRVSSNTNSY                           | 801.831  | 2 | 0.000 | 0.995 |
|        |                                        | DSEEDRVSSNTNSY                           | 801.829  | 2 | 0.002 | 0.815 |
| 438930 | Q8IZM8;                                | Peptide                                  | M/z      | z | q-val | P     |
|        |                                        | DIYATDQEGNFK                             | 700.821  | 2 | 0.004 | 0.114 |
|        |                                        | DIYATDQEGNFK                             | 700.823  | 2 | 0.001 | 0.946 |
|        |                                        | DIYATDQEGNFK                             | 700.820  | 2 | 0.000 | 1.000 |
|        |                                        | DIYATDQEGNFK                             | 700.822  | 2 | 0.000 | 1.000 |
|        |                                        | DIYATDQEGNFK                             | 700.821  | 2 | 0.000 | 1.000 |
|        |                                        | DIYATDQEGNFK                             | 700.819  | 2 | 0.004 | 0.104 |
|        |                                        | DIYATDQEGNFK                             | 700.819  | 2 | 0.000 | 1.000 |
|        |                                        | DIYATDQEGNFK                             | 700.820  | 2 | 0.000 | 0.996 |
|        |                                        | DIYATDQEGNFK                             | 700.820  | 2 | 0.000 | 0.994 |
|        |                                        | DIYATDQEGNFK                             | 700.821  | 2 | 0.000 | 0.990 |
|        |                                        | DIYATDQEGNFK                             | 700.819  | 2 | 0.001 | 0.761 |
| 438949 | P0C2W7; Q5JQC4;                        | Peptide                                  | M/z      | z | q-val | P     |
|        |                                        | DRHPTQGDQEAPVVSQEGAQAEAAAGAGNQEGGDSGPDSS | 927.647  | 4 | 0.000 | 1.000 |
|        |                                        | DRHPTQGDQEAPVVSQEGAQAEAAAGAGNQEGGDSGPDSS | 1236.530 | 3 | 0.001 | 0.901 |
| 439171 | F5H2N6; Q9HC16; Q9HC16-2;              | Peptide                                  | M/z      | z | q-val | P     |
|        |                                        | VFNTVYSLVK                               | 585.332  | 2 | 0.000 | 1.000 |
|        |                                        | VFNTVYSLVK                               | 585.333  | 2 | 0.001 | 0.989 |
| 439477 | B4DYL6; Q96S53; Q96S53-2;<br>Q96S53-3; | Peptide                                  | M/z      | z | q-val | P     |
|        |                                        | LEEFEGGGGGEGNVSQVGR                      | 626.625  | 3 | 0.000 | 1.000 |
|        |                                        | LEEFEGGGGGEGNVSQVGR                      | 939.435  | 2 | 0.004 | 0.120 |
|        |                                        | LEEFEGGGGGEGNVSQVGR                      | 939.435  | 2 | 0.000 | 1.000 |
|        |                                        | LEEFEGGGGGEGNVSQVGR                      | 939.437  | 2 | 0.000 | 1.000 |



| ID                  | Indistinguishable (Sameset) Proteins | Peptide Spectrum Matches |                 |                     |         |       |
|---------------------|--------------------------------------|--------------------------|-----------------|---------------------|---------|-------|
|                     |                                      | Peptide                  | M/z             | z                   | q-val   | P     |
| 439516              | P50150;                              | EDPLIIPVPASENPFRR        | 888.471         | 2                   | 0.008   | 0.027 |
|                     |                                      | EDPLIIPVPASENPFRR        | 897.477         | 2                   | 0.002   | 0.469 |
|                     |                                      | EDPLIIPVPASENPFRR        | 598.653         | 3                   | 0.000   | 0.999 |
|                     |                                      | EDPLIIPVPASENPFRR        | 598.653         | 3                   | 0.000   | 0.987 |
|                     |                                      | EDPLIIPVPASENPFRR        | 897.475         | 2                   | 0.000   | 1.000 |
|                     |                                      | EDPLIIPVPASENPFRR        | 897.478         | 2                   | 0.001   | 0.931 |
|                     |                                      | EDPLIIPVPASENPFRR        | 897.475         | 2                   | 0.001   | 0.961 |
|                     |                                      | 439547                   | O15217; Q6P4G1; | KKPPPDEIYVRTVYNIFRP | 583.827 | 4     |
| KKPPPDEIYVRTVYNIFRP | 584.076                              |                          |                 | 4                   | 0.002   | 0.576 |
| KKPPPDEIYVRTVYNIFRP | 583.558                              |                          |                 | 4                   | 0.004   | 0.116 |
| Peptide             | M/z                                  |                          |                 | z                   | q-val   | P     |
| 439682              | C9JKQ0; Q9NQR1; Q9NQR1-2;            | GPLVFPFNQK               | 548.812         | 2                   | 0.000   | 0.985 |
|                     |                                      | GPLVFPFNQK               | 548.812         | 2                   | 0.000   | 1.000 |
|                     |                                      | GPLVFPFNQK               | 548.812         | 2                   | 0.000   | 0.992 |
|                     |                                      | Peptide                  | M/z             | z                   | q-val   | P     |
| 439875              | P06702;                              | VIEHIMEDLDTNADK          | 586.946         | 3                   | 0.001   | 0.987 |
|                     |                                      | VIEHIMEDLDTNADK          | 586.946         | 3                   | 0.000   | 1.000 |
|                     |                                      | VIEHIMEDLDTNADK          | 879.915         | 2                   | 0.000   | 1.000 |
|                     |                                      | VIEHIMEDLDTNADK          | 581.610         | 3                   | 0.000   | 1.000 |
|                     |                                      | VIEHIMEDLDTNADK          | 586.946         | 3                   | 0.000   | 0.979 |
|                     |                                      | VIEHIMEDLDTNADK          | 586.946         | 3                   | 0.000   | 1.000 |
|                     |                                      | VIEHIMEDLDTNADK          | 879.914         | 2                   | 0.001   | 0.820 |
|                     |                                      | Peptide                  | M/z             | z                   | q-val   | P     |
| 440171              | C9J5G6; C9JBA3; C9JCH3; C9JZW5;      | DNPAALQTQVKR             | 447.581         | 3                   | 0.000   | 0.980 |
|                     |                                      | DNPAALQTQVKR             | 447.581         | 3                   | 0.000   | 1.000 |
|                     |                                      | DNPAALQTQVKR             | 447.580         | 3                   | 0.000   | 0.998 |
|                     |                                      | DNPAALQTQVKR             | 670.867         | 2                   | 0.000   | 1.000 |
|                     |                                      | DNPAALQTQVKR             | 670.867         | 2                   | 0.000   | 1.000 |
|                     |                                      | DNPAALQTQVKR             | 670.867         | 2                   | 0.000   | 1.000 |
|                     |                                      | DNPAALQTQVKR             | 670.869         | 2                   | 0.000   | 1.000 |
|                     |                                      | Peptide                  | M/z             | z                   | q-val   | P     |
| 440237              | Q68D20;                              | APETDDSFSDVDCHSNQEDTGCK  | 871.999         | 3                   | 0.000   | 1.000 |
|                     |                                      | APETDDSFSDVDCHSNQEDTGCK  | 872.000         | 3                   | 0.000   | 1.000 |
|                     |                                      | Peptide                  | M/z             | z                   | q-val   | P     |

| ID     | Indistinguishable (SameSet) Proteins                                            | Peptide Spectrum Matches |         |   |       |       |
|--------|---------------------------------------------------------------------------------|--------------------------|---------|---|-------|-------|
|        |                                                                                 | Peptide                  | M/z     | z | q-val | P     |
| 440364 | Q5T586; Q5T593; Q8IW50; Q8IW50-2;<br>Q8IW50-3; Q8IW50-4; Q8IW50-5;<br>Q8IW50-6; | DLNIQLLK                 | 478.792 | 2 | 0.000 | 0.994 |
|        |                                                                                 | DLNIQLLK                 | 478.792 | 2 | 0.002 | 0.536 |
|        |                                                                                 | DLNIQLLK                 | 478.792 | 2 | 0.000 | 0.984 |
|        |                                                                                 | DLNIQLLK                 | 478.792 | 2 | 0.001 | 0.797 |
|        |                                                                                 | DLNIQLLK                 | 478.792 | 2 | 0.000 | 1.000 |
|        |                                                                                 | DLNIQLLK                 | 478.792 | 2 | 0.000 | 0.977 |
|        |                                                                                 | DLNIQLLK                 | 478.792 | 2 | 0.000 | 1.000 |
|        |                                                                                 | DLNIQLLK                 | 478.792 | 2 | 0.000 | 0.993 |
|        |                                                                                 | DLNIQLLK                 | 478.792 | 2 | 0.000 | 0.981 |
|        |                                                                                 | DLNIQLLK                 | 478.792 | 2 | 0.000 | 0.996 |
|        |                                                                                 | DLNIQLLK                 | 478.792 | 2 | 0.001 | 0.713 |
|        |                                                                                 | DLNIQLLK                 | 478.792 | 2 | 0.003 | 0.320 |
|        |                                                                                 | DLNIQLLK                 | 478.792 | 2 | 0.000 | 0.999 |
|        |                                                                                 | DLNIQLLK                 | 478.793 | 2 | 0.000 | 0.998 |
|        |                                                                                 | DLNIQLLK                 | 478.792 | 2 | 0.000 | 0.997 |
|        |                                                                                 | DLNIQLLK                 | 478.792 | 2 | 0.000 | 0.998 |
|        |                                                                                 | DLNIQLLK                 | 478.793 | 2 | 0.000 | 1.000 |
|        |                                                                                 | DLNIQLLK                 | 478.792 | 2 | 0.000 | 1.000 |
|        |                                                                                 | DLNIQLLK                 | 478.792 | 2 | 0.000 | 1.000 |
|        |                                                                                 | DLNIQLLK                 | 478.792 | 2 | 0.000 | 1.000 |
|        |                                                                                 | DLNIQLLK                 | 478.792 | 2 | 0.000 | 0.984 |
|        |                                                                                 | DLNIQLLK                 | 478.793 | 2 | 0.000 | 0.997 |
|        |                                                                                 | DLNIQLLK                 | 478.792 | 2 | 0.000 | 1.000 |
|        |                                                                                 | DLNIQLLK                 | 478.792 | 2 | 0.000 | 1.000 |
|        |                                                                                 | DLNIQLLK                 | 478.793 | 2 | 0.000 | 1.000 |
|        |                                                                                 | DLNIQLLK                 | 478.792 | 2 | 0.000 | 1.000 |

| ID     | Indistinguishable (SameSet) Proteins         | Peptide Spectrum Matches |         |   |       |       |
|--------|----------------------------------------------|--------------------------|---------|---|-------|-------|
| 440398 | Q9NQG1;                                      | Peptide                  | M/z     | z | q-val | P     |
|        |                                              | SHEAEAEPSEPR             | 670.302 | 2 | 0.000 | 1.000 |
|        |                                              | SHEAEAEPSEPR             | 670.304 | 2 | 0.000 | 1.000 |
|        |                                              | SHEAEAEPSEPR             | 669.801 | 2 | 0.000 | 1.000 |
|        |                                              | SHEAEAEPSEPR             | 446.869 | 3 | 0.005 | 0.057 |
|        |                                              | SHEAEAEPSEPR             | 669.800 | 2 | 0.000 | 1.000 |
|        |                                              | SHEAEAEPSEPR             | 670.302 | 2 | 0.000 | 1.000 |
|        |                                              | SHEAEAEPSEPR             | 669.799 | 2 | 0.000 | 1.000 |
|        |                                              | SHEAEAEPSEPR             | 446.869 | 3 | 0.001 | 0.833 |
|        |                                              | SHEAEAEPSEPR             | 446.869 | 3 | 0.000 | 1.000 |
|        |                                              | SHEAEAEPSEPR             | 669.800 | 2 | 0.000 | 1.000 |
|        |                                              | SHEAEAEPSEPR             | 669.302 | 2 | 0.004 | 0.082 |
|        |                                              | SHEAEAEPSEPR             | 669.800 | 2 | 0.000 | 1.000 |
|        |                                              | SHEAEAEPSEPR             | 669.800 | 2 | 0.000 | 1.000 |
|        |                                              | SHEAEAEPSEPR             | 669.800 | 2 | 0.000 | 1.000 |
| 440452 | Q9NY74;                                      | Peptide                  | M/z     | z | q-val | P     |
|        |                                              | APVNTDLFGSANLGSK         | 795.909 | 2 | 0.000 | 1.000 |
| 440639 | C9JEA7; C9JI17; C9JRJ2; Q9BRC7;<br>Q9BRC7-2; | Peptide                  | M/z     | z | q-val | P     |
|        |                                              | DGQKLTLLEFL              | 638.862 | 2 | 0.000 | 0.982 |
|        |                                              | DGQKLTLLEFL              | 638.864 | 2 | 0.000 | 1.000 |
|        |                                              | DGQKLTLLEFL              | 638.861 | 2 | 0.000 | 1.000 |
|        |                                              | DGQKLTLLEFL              | 638.842 | 2 | 0.009 | 0.120 |
| 440672 | H0Y3I5; Q6PJF5; Q6PJF5-2;                    | Peptide                  | M/z     | z | q-val | P     |
|        |                                              | DGQIEQLVLR               | 585.828 | 2 | 0.001 | 0.970 |
|        |                                              | DGQIEQLVLR               | 585.827 | 2 | 0.001 | 0.717 |
|        |                                              | DGQIEQLVLR               | 585.827 | 2 | 0.000 | 1.000 |
| 440700 | Q7RTP0;                                      | Peptide                  | M/z     | z | q-val | P     |
|        |                                              | GTAAAAAAAAAAAAAAGEGAR    | 806.904 | 2 | 0.000 | 1.000 |
|        |                                              | GTAAAAAAAAAAAAAAGEGAR    | 806.906 | 2 | 0.000 | 1.000 |
|        |                                              | GTAAAAAAAAAAAAAAGEGAR    | 538.282 | 3 | 0.009 | 0.024 |
|        |                                              | GTAAAAAAAAAAAAAAGEGAR    | 538.270 | 3 | 0.008 | 0.028 |
|        |                                              | GTAAAAAAAAAAAAAAGEGAR    | 806.907 | 2 | 0.000 | 0.997 |
|        |                                              | GTAAAAAAAAAAAAAAGEGAR    | 806.904 | 2 | 0.000 | 1.000 |
|        |                                              | GTAAAAAAAAAAAAAAGEGAR    | 806.904 | 2 | 0.000 | 0.980 |
|        |                                              | GTAAAAAAAAAAAAAAGEGAR    | 806.905 | 2 | 0.000 | 0.996 |
|        |                                              | GTAAAAAAAAAAAAAAGEGAR    | 806.905 | 2 | 0.001 | 0.782 |
|        |                                              | GTAAAAAAAAAAAAAAGEGAR    | 806.904 | 2 | 0.001 | 0.522 |

| ID                 | Indistinguishable (SameSet) Proteins                                                                                                      | Peptide Spectrum Matches  |         |       |       |       |
|--------------------|-------------------------------------------------------------------------------------------------------------------------------------------|---------------------------|---------|-------|-------|-------|
| 440801             | O60779;                                                                                                                                   | Peptide                   | M/z     | z     | q-val | P     |
|                    |                                                                                                                                           | VQNGGIVTDTPASNHLPGWEDIESK | 888.771 | 3     | 0.000 | 1.000 |
|                    |                                                                                                                                           | VQNGGIVTDTPASNHLPGWEDIESK | 888.771 | 3     | 0.001 | 0.964 |
|                    |                                                                                                                                           | VQNGGIVTDTPASNHLPGWEDIESK | 888.765 | 3     | 0.000 | 1.000 |
|                    |                                                                                                                                           | VQNGGIVTDTPASNHLPGWEDIESK | 888.767 | 3     | 0.000 | 1.000 |
|                    |                                                                                                                                           | VQNGGIVTDTPASNHLPGWEDIESK | 888.768 | 3     | 0.000 | 1.000 |
|                    |                                                                                                                                           | VQNGGIVTDTPASNHLPGWEDIESK | 888.767 | 3     | 0.000 | 0.995 |
| 440880             | Q969U6; Q969U6-2;                                                                                                                         | Peptide                   | M/z     | z     | q-val | P     |
|                    |                                                                                                                                           | IFDLGSDNEEVVAGPAPAHAK     | 713.023 | 3     | 0.000 | 1.000 |
|                    |                                                                                                                                           | IFDLGSDNEEVVAGPAPAHAK     | 713.022 | 3     | 0.000 | 1.000 |
| 440977             | Q5VZS4; Q9NP31; Q9NP31-2; Q9NP31-3;                                                                                                       | Peptide                   | M/z     | z     | q-val | P     |
|                    |                                                                                                                                           | DRGQAWLPLGPPQ             | 717.874 | 2     | 0.003 | 0.369 |
|                    |                                                                                                                                           | DRGQAWLPLGPPQ             | 717.878 | 2     | 0.000 | 0.995 |
|                    |                                                                                                                                           | DRGQAWLPLGPPQ             | 717.878 | 2     | 0.000 | 1.000 |
|                    |                                                                                                                                           | DRGQAWLPLGPPQ             | 717.878 | 2     | 0.000 | 0.980 |
|                    |                                                                                                                                           | DRGQAWLPLGPPQ             | 717.877 | 2     | 0.000 | 1.000 |
|                    |                                                                                                                                           | DRGQAWLPLGPPQ             | 717.879 | 2     | 0.001 | 0.774 |
|                    |                                                                                                                                           | DRGQAWLPLGPPQ             | 717.877 | 2     | 0.000 | 0.990 |
|                    |                                                                                                                                           | DRGQAWLPLGPPQ             | 717.878 | 2     | 0.000 | 0.988 |
|                    |                                                                                                                                           | DRGQAWLPLGPPQ             | 717.878 | 2     | 0.000 | 1.000 |
|                    |                                                                                                                                           | DRGQAWLPLGPPQ             | 717.878 | 2     | 0.001 | 0.838 |
| 440996             | E9PB10; E9PQW8; F2Z346; Q15777;                                                                                                           | Peptide                   | M/z     | z     | q-val | P     |
|                    |                                                                                                                                           | VTITVDEYSSNPTQAFTHYNINQSR | 962.461 | 3     | 0.000 | 1.000 |
| 441034             | A6NER3; A6NGK3; B5MC01; O76087; POCL80; POCL80-2; POCL81; POCL82; Q13065; Q13066; Q13067; Q13068; Q13069; Q13070; Q4V326; Q6NT46; Q9UEU5; | Peptide                   | M/z     | z     | q-val | P     |
|                    |                                                                                                                                           | DEVEPATPEEGEPATQRQ        | 661.636 | 3     | 0.000 | 0.988 |
|                    |                                                                                                                                           | DEVEPATPEEGEPATQRQ        | 991.950 | 2     | 0.000 | 1.000 |
|                    |                                                                                                                                           | DEVEPATPEEGEPATQRQ        | 661.636 | 3     | 0.000 | 1.000 |
|                    |                                                                                                                                           | DEVEPATPEEGEPATQRQ        | 991.950 | 2     | 0.000 | 1.000 |
|                    |                                                                                                                                           | DEVEPATPEEGEPATQRQ        | 991.949 | 2     | 0.000 | 1.000 |
|                    |                                                                                                                                           | DEVEPATPEEGEPATQRQ        | 661.635 | 3     | 0.009 | 0.105 |
|                    |                                                                                                                                           | DEVEPATPEEGEPATQRQ        | 661.637 | 3     | 0.001 | 0.965 |
|                    |                                                                                                                                           | DEVEPATPEEGEPATQRQ        | 991.953 | 2     | 0.000 | 1.000 |
| DEVEPATPEEGEPATQRQ | 991.951                                                                                                                                   | 2                         | 0.000   | 1.000 |       |       |

| ID                 | Indistinguishable (SameSet) Proteins    | Peptide Spectrum Matches |         |         |       |       |
|--------------------|-----------------------------------------|--------------------------|---------|---------|-------|-------|
|                    |                                         | Peptide                  | M/z     | z       | q-val | P     |
| 441220             | P02749;                                 | Peptide                  | M/z     | z       | q-val | P     |
|                    |                                         | EHSSLAFWK                | 368.854 | 3       | 0.001 | 0.851 |
|                    |                                         | EHSSLAFWK                | 368.854 | 3       | 0.000 | 0.972 |
|                    |                                         | EHSSLAFWK                | 552.778 | 2       | 0.001 | 0.706 |
|                    |                                         | EHSSLAFWK                | 368.854 | 3       | 0.000 | 0.998 |
|                    |                                         | EHSSLAFWK                | 552.777 | 2       | 0.000 | 0.999 |
|                    |                                         | EHSSLAFWK                | 368.854 | 3       | 0.002 | 0.969 |
|                    |                                         | EHSSLAFWK                | 368.854 | 3       | 0.001 | 0.994 |
|                    |                                         | EHSSLAFWK                | 368.854 | 3       | 0.001 | 0.987 |
|                    |                                         | EHSSLAFWK                | 368.854 | 3       | 0.000 | 0.999 |
|                    |                                         | EHSSLAFWK                | 368.854 | 3       | 0.002 | 0.833 |
|                    |                                         | EHSSLAFWK                | 552.777 | 2       | 0.001 | 0.976 |
|                    |                                         | EHSSLAFWK                | 552.775 | 2       | 0.001 | 0.982 |
|                    |                                         | EHSSLAFWK                | 552.777 | 2       | 0.000 | 1.000 |
|                    |                                         | 441255                   | Q14CZ0; | Peptide | M/z   | z     |
| ATSTETSSSVETDLQPFR | 978.461                                 |                          |         | 2       | 0.000 | 1.000 |
| 441378             | Q8IZC4;                                 | Peptide                  | M/z     | z       | q-val | P     |
|                    |                                         | VLYPASEPLHDEK            | 499.926 | 3       | 0.000 | 0.988 |
|                    |                                         | VLYPASEPLHDEK            | 499.926 | 3       | 0.000 | 1.000 |
| 441412             | D3DPY5; E9PMR1; E9PNL3; E9PNU0; Q99437; | Peptide                  | M/z     | z       | q-val | P     |
|                    |                                         | SATDPKAIGHRNY            | 715.363 | 2       | 0.000 | 0.998 |
|                    |                                         | SATDPKAIGHRNY            | 477.245 | 3       | 0.000 | 1.000 |
|                    |                                         | SATDPKAIGHRNY            | 477.245 | 3       | 0.000 | 1.000 |
|                    |                                         | SATDPKAIGHRNY            | 477.244 | 3       | 0.000 | 1.000 |
|                    |                                         | SATDPKAIGHRNY            | 477.245 | 3       | 0.002 | 0.996 |
|                    |                                         | SATDPKAIGHRNY            | 477.243 | 3       | 0.000 | 1.000 |
| 441746             | F8WBY3; Q96HD1; Q96HD1-2;               | Peptide                  | M/z     | z       | q-val | P     |
|                    |                                         | DNFGGGNTAWEEENLSK        | 934.403 | 2       | 0.000 | 1.000 |
|                    |                                         | DNFGGGNTAWEEENLSK        | 934.411 | 2       | 0.000 | 1.000 |

| ID     | Indistinguishable (Sameset) Proteins | Peptide Spectrum Matches |         |   |       |       |
|--------|--------------------------------------|--------------------------|---------|---|-------|-------|
| 441799 | Q6ZVZ8; Q6ZVZ8-2;                    | Peptide                  | M/z     | z | q-val | P     |
|        |                                      | RPDEHGR                  | 433.715 | 2 | 0.001 | 0.951 |
|        |                                      | RPDEHGR                  | 433.715 | 2 | 0.001 | 0.934 |
|        |                                      | RPDEHGR                  | 433.715 | 2 | 0.001 | 0.929 |
|        |                                      | RPDEHGR                  | 433.715 | 2 | 0.000 | 1.000 |
|        |                                      | RPDEHGR                  | 433.715 | 2 | 0.002 | 0.850 |
|        |                                      | RPDEHGR                  | 433.715 | 2 | 0.000 | 1.000 |
|        |                                      | RPDEHGR                  | 433.715 | 2 | 0.004 | 0.251 |
|        |                                      | RPDEHGR                  | 433.715 | 2 | 0.003 | 0.458 |
|        |                                      | RPDEHGR                  | 433.715 | 2 | 0.002 | 0.784 |
|        |                                      | RPDEHGR                  | 433.715 | 2 | 0.010 | 0.542 |
|        |                                      | RPDEHGR                  | 433.715 | 2 | 0.009 | 0.633 |
|        |                                      | RPDEHGR                  | 433.715 | 2 | 0.002 | 0.993 |
|        |                                      | RPDEHGR                  | 433.715 | 2 | 0.010 | 0.574 |
|        |                                      | RPDEHGR                  | 433.715 | 2 | 0.000 | 0.999 |
|        |                                      | RPDEHGR                  | 433.715 | 2 | 0.000 | 0.999 |
|        |                                      | RPDEHGR                  | 433.715 | 2 | 0.003 | 0.988 |
|        |                                      | RPDEHGR                  | 433.715 | 2 | 0.006 | 0.716 |
|        |                                      | RPDEHGR                  | 433.715 | 2 | 0.002 | 0.979 |
|        |                                      | RPDEHGR                  | 433.715 | 2 | 0.000 | 0.999 |
|        |                                      | RPDEHGR                  | 433.715 | 2 | 0.001 | 0.996 |
|        |                                      | RPDEHGR                  | 433.715 | 2 | 0.000 | 1.000 |
|        |                                      | RPDEHGR                  | 433.715 | 2 | 0.002 | 0.961 |
|        |                                      | RPDEHGR                  | 433.715 | 2 | 0.003 | 0.934 |
|        |                                      | RPDEHGR                  | 433.715 | 2 | 0.001 | 0.919 |
|        |                                      | RPDEHGR                  | 433.715 | 2 | 0.000 | 0.999 |
|        |                                      | RPDEHGR                  | 433.715 | 2 | 0.001 | 0.953 |
|        |                                      | RPDEHGR                  | 433.715 | 2 | 0.001 | 0.989 |
|        |                                      | RPDEHGR                  | 433.715 | 2 | 0.001 | 0.980 |
|        |                                      | RPDEHGR                  | 433.715 | 2 | 0.001 | 0.997 |
|        |                                      | RPDEHGR                  | 433.715 | 2 | 0.000 | 1.000 |
|        |                                      | RPDEHGR                  | 433.715 | 2 | 0.000 | 1.000 |
|        |                                      | RPDEHGR                  | 433.715 | 2 | 0.000 | 0.999 |
|        |                                      | RPDEHGR                  | 433.715 | 2 | 0.000 | 0.999 |
|        |                                      | RPDEHGR                  | 433.715 | 2 | 0.000 | 1.000 |
|        |                                      | RPDEHGR                  | 433.715 | 2 | 0.008 | 0.702 |
|        |                                      | RPDEHGR                  | 433.715 | 2 | 0.008 | 0.520 |
|        |                                      | RPDEHGR                  | 433.715 | 2 | 0.004 | 0.811 |
|        |                                      | RPDEHGR                  | 433.728 | 2 | 0.006 | 0.044 |
|        |                                      | RPDEHGR                  | 433.728 | 2 | 0.008 | 0.026 |

| ID             | Indistinguishable (SameSet) Proteins               | Peptide Spectrum Matches |                                                |         |       |       |
|----------------|----------------------------------------------------|--------------------------|------------------------------------------------|---------|-------|-------|
|                |                                                    | Peptide                  | M/z                                            | z       | q-val | P     |
|                |                                                    | RPDEHGR                  | 433.715                                        | 2       | 0.000 | 1.000 |
|                |                                                    | RPDEHGR                  | 433.715                                        | 2       | 0.000 | 0.998 |
| 441811         | Q8IZJ1; Q8IZJ1-2;                                  | Peptide                  | M/z                                            | z       | q-val | P     |
|                |                                                    | IPMTNSPLLDPLPSLK         | 876.988                                        | 2       | 0.000 | 1.000 |
|                |                                                    | IPMTNSPLLDPLPSLK         | 876.486                                        | 2       | 0.000 | 1.000 |
|                |                                                    | IPMTNSPLLDPLPSLK         | 876.987                                        | 2       | 0.001 | 0.779 |
| 441812         | B4DND0; C9J486; C9JIP2; C9K0J2;<br>F8WD51; Q16831; | Peptide                  | M/z                                            | z       | q-val | P     |
|                |                                                    | AATGANA EKAESHN          | 706.823                                        | 2       | 0.000 | 1.000 |
|                |                                                    | AATGANA EKAESHN          | 706.824                                        | 2       | 0.000 | 1.000 |
|                |                                                    | AATGANA EKAESHN          | 706.823                                        | 2       | 0.000 | 1.000 |
|                |                                                    | AATGANA EKAESHN          | 706.824                                        | 2       | 0.000 | 0.997 |
| 441842         | Q9BSU1;                                            | Peptide                  | M/z                                            | z       | q-val | P     |
|                |                                                    | MLDLEVVPER               | 608.817                                        | 2       | 0.001 | 0.969 |
|                |                                                    | MLDLEVVPER               | 608.816                                        | 2       | 0.000 | 0.989 |
|                |                                                    | MLDLEVVPER               | 600.818                                        | 2       | 0.001 | 0.949 |
|                |                                                    | MLDLEVVPER               | 608.815                                        | 2       | 0.000 | 1.000 |
|                |                                                    | MLDLEVVPER               | 608.816                                        | 2       | 0.000 | 1.000 |
|                |                                                    | MLDLEVVPER               | 608.815                                        | 2       | 0.001 | 0.938 |
|                |                                                    | MLDLEVVPER               | 608.816                                        | 2       | 0.003 | 0.396 |
|                |                                                    | MLDLEVVPER               | 608.818                                        | 2       | 0.006 | 0.125 |
|                |                                                    | MLDLEVVPER               | 608.817                                        | 2       | 0.001 | 0.755 |
|                |                                                    | MLDLEVVPER               | 608.817                                        | 2       | 0.002 | 0.455 |
|                |                                                    | MLDLEVVPER               | 608.820                                        | 2       | 0.002 | 0.486 |
|                |                                                    | MLDLEVVPER               | 608.820                                        | 2       | 0.003 | 0.304 |
|                |                                                    | MLDLEVVPER               | 608.817                                        | 2       | 0.004 | 0.266 |
|                |                                                    | MLDLEVVPER               | 608.323                                        | 2       | 0.004 | 0.203 |
|                |                                                    | MLDLEVVPER               | 608.814                                        | 2       | 0.002 | 0.621 |
|                |                                                    | MLDLEVVPER               | 609.320                                        | 2       | 0.006 | 0.133 |
|                |                                                    | 441914                   | E7EU29; G3V1T8; Q6ZVD8; Q6ZVD8-2;<br>Q6ZVD8-3; | Peptide | M/z   | z     |
| VFSLEQDP EEAQR | 774.371                                            |                          |                                                | 2       | 0.000 | 1.000 |

| ID             | Indistinguishable (SameSet) Proteins | Peptide Spectrum Matches |         |       |       |       |
|----------------|--------------------------------------|--------------------------|---------|-------|-------|-------|
|                |                                      | Peptide                  | M/z     | z     | q-val | P     |
| 441922         | A2Q0V1; O76082; O76082-2;            | Peptide                  | M/z     | z     | q-val | P     |
|                |                                      | DGQERPTILKSTAF           | 521.610 | 3     | 0.000 | 0.999 |
|                |                                      | DGQERPTILKSTAF           | 521.611 | 3     | 0.000 | 0.996 |
|                |                                      | DGQERPTILKSTAF           | 521.611 | 3     | 0.000 | 0.991 |
|                |                                      | DGQERPTILKSTAF           | 521.611 | 3     | 0.000 | 1.000 |
|                |                                      | DGQERPTILKSTAF           | 521.611 | 3     | 0.000 | 0.988 |
|                |                                      | DGQERPTILKSTAF           | 521.611 | 3     | 0.001 | 0.780 |
|                |                                      | DGQERPTILKSTAF           | 521.611 | 3     | 0.000 | 0.999 |
|                |                                      | DGQERPTILKSTAF           | 521.611 | 3     | 0.002 | 0.454 |
|                |                                      | DGQERPTILKSTAF           | 781.914 | 2     | 0.006 | 0.187 |
|                |                                      | DGQERPTILKSTAF           | 781.912 | 2     | 0.004 | 0.309 |
|                |                                      | DGQERPTILKSTAF           | 521.611 | 3     | 0.000 | 1.000 |
|                |                                      | DGQERPTILKSTAF           | 781.911 | 2     | 0.003 | 0.405 |
|                |                                      | DGQERPTILKSTAF           | 781.912 | 2     | 0.000 | 0.991 |
|                |                                      | DGQERPTILKSTAF           | 781.913 | 2     | 0.000 | 0.983 |
|                |                                      | DGQERPTILKSTAF           | 521.611 | 3     | 0.000 | 1.000 |
|                |                                      | DGQERPTILKSTAF           | 521.610 | 3     | 0.000 | 1.000 |
|                |                                      | DGQERPTILKSTAF           | 521.611 | 3     | 0.000 | 1.000 |
|                |                                      | DGQERPTILKSTAF           | 521.611 | 3     | 0.000 | 1.000 |
|                |                                      | DGQERPTILKSTAF           | 781.913 | 2     | 0.000 | 0.983 |
| DGQERPTILKSTAF | 521.611                              | 3                        | 0.000   | 1.000 |       |       |
| DGQERPTILKSTAF | 521.609                              | 3                        | 0.000   | 1.000 |       |       |
| 441947         | Q02742;                              | Peptide                  | M/z     | z     | q-val | P     |
|                |                                      | WQYFEGDVSK               | 629.790 | 2     | 0.000 | 1.000 |



| ID     | Indistinguishable (Sameset) Proteins      | Peptide Spectrum Matches |         |   |       |       |
|--------|-------------------------------------------|--------------------------|---------|---|-------|-------|
| 442032 | A6NEW6; A6NJQ4; D6RGX4; Q658T7; Q658T7-2; | Peptide                  | M/z     | z | q-val | P     |
|        |                                           | QTGAAADIPQPAVR           | 465.587 | 3 | 0.005 | 0.770 |
|        |                                           | QTGAAADIPQPAVR           | 697.878 | 2 | 0.005 | 0.810 |
|        |                                           | QTGAAADIPQPAVR           | 697.877 | 2 | 0.004 | 0.889 |
|        |                                           | QTGAAADIPQPAVR           | 465.587 | 3 | 0.004 | 0.929 |
|        |                                           | QTGAAADIPQPAVR           | 697.878 | 2 | 0.003 | 0.976 |
|        |                                           | QTGAAADIPQPAVR           | 465.590 | 3 | 0.008 | 0.324 |
|        |                                           | QTGAAADIPQPAVR           | 465.589 | 3 | 0.008 | 0.341 |
|        |                                           | QTGAAADIPQPAVR           | 465.585 | 3 | 0.003 | 0.875 |
|        |                                           | QTGAAADIPQPAVR           | 465.587 | 3 | 0.000 | 1.000 |
|        |                                           | QTGAAADIPQPAVR           | 465.587 | 3 | 0.001 | 0.993 |
|        |                                           | QTGAAADIPQPAVR           | 465.586 | 3 | 0.000 | 1.000 |
|        |                                           | QTGAAADIPQPAVR           | 465.586 | 3 | 0.000 | 1.000 |
|        |                                           | QTGAAADIPQPAVR           | 465.587 | 3 | 0.000 | 0.999 |
|        |                                           | QTGAAADIPQPAVR           | 697.875 | 2 | 0.003 | 0.867 |
|        |                                           | QTGAAADIPQPAVR           | 465.587 | 3 | 0.000 | 1.000 |
|        |                                           | QTGAAADIPQPAVR           | 465.587 | 3 | 0.000 | 1.000 |
|        |                                           | QTGAAADIPQPAVR           | 465.587 | 3 | 0.006 | 0.614 |
|        |                                           | QTGAAADIPQPAVR           | 465.586 | 3 | 0.000 | 1.000 |
|        |                                           | QTGAAADIPQPAVR           | 465.587 | 3 | 0.000 | 0.999 |
|        |                                           | QTGAAADIPQPAVR           | 465.588 | 3 | 0.002 | 0.937 |
|        |                                           | QTGAAADIPQPAVR           | 697.876 | 2 | 0.008 | 0.326 |
|        |                                           | QTGAAADIPQPAVR           | 465.587 | 3 | 0.000 | 0.999 |
|        |                                           | QTGAAADIPQPAVR           | 697.876 | 2 | 0.007 | 0.410 |
|        |                                           | QTGAAADIPQPAVR           | 465.588 | 3 | 0.002 | 0.974 |
|        |                                           | QTGAAADIPQPAVR           | 465.586 | 3 | 0.000 | 1.000 |
|        |                                           | QTGAAADIPQPAVR           | 465.586 | 3 | 0.000 | 1.000 |
|        |                                           | QTGAAADIPQPAVR           | 465.586 | 3 | 0.000 | 0.999 |
|        |                                           | QTGAAADIPQPAVR           | 465.586 | 3 | 0.000 | 1.000 |
|        |                                           | QTGAAADIPQPAVR           | 697.876 | 2 | 0.006 | 0.486 |
|        |                                           | QTGAAADIPQPAVR           | 465.586 | 3 | 0.000 | 1.000 |
|        |                                           | QTGAAADIPQPAVR           | 465.586 | 3 | 0.000 | 1.000 |
|        |                                           | QTGAAADIPQPAVR           | 465.587 | 3 | 0.001 | 0.995 |
|        |                                           | QTGAAADIPQPAVR           | 697.876 | 2 | 0.006 | 0.596 |
|        |                                           | QTGAAADIPQPAVR           | 465.587 | 3 | 0.001 | 0.992 |
|        |                                           | QTGAAADIPQPAVR           | 697.876 | 2 | 0.003 | 0.836 |
|        |                                           | QTGAAADIPQPAVR           | 465.587 | 3 | 0.003 | 0.904 |
|        |                                           | QTGAAADIPQPAVR           | 465.587 | 3 | 0.002 | 0.983 |
|        |                                           | QTGAAADIPQPAVR           | 465.587 | 3 | 0.001 | 0.991 |
|        |                                           | QTGAAADIPQPAVR           | 465.587 | 3 | 0.002 | 0.972 |
|        |                                           | QTGAAADIPQPAVR           | 465.587 | 3 | 0.001 | 0.993 |

| ID     | Indistinguishable (SameSet) Proteins | Peptide Spectrum Matches |         |   |       |       |
|--------|--------------------------------------|--------------------------|---------|---|-------|-------|
|        |                                      | Peptide                  | M/z     | z | q-val | P     |
|        |                                      | QTGAAADIPQPAVR           | 465.587 | 3 | 0.001 | 0.993 |
|        |                                      | QTGAAADIPQPAVR           | 465.586 | 3 | 0.001 | 0.998 |
|        |                                      | QTGAAADIPQPAVR           | 697.876 | 2 | 0.003 | 0.921 |
|        |                                      | QTGAAADIPQPAVR           | 697.875 | 2 | 0.009 | 0.272 |
|        |                                      | QTGAAADIPQPAVR           | 465.587 | 3 | 0.001 | 0.991 |
| 442074 | Q4TT61; Q9BV90;                      | Peptide                  | M/z     | z | q-val | P     |
|        |                                      | DEVSFIKLRQK              | 497.628 | 3 | 0.000 | 1.000 |
| 442280 | Q5JSC9; Q96LT4; Q96LT4-2;            | Peptide                  | M/z     | z | q-val | P     |
|        |                                      | DSPMGSMTPFISALQST        | 901.905 | 2 | 0.003 | 0.442 |
|        |                                      | DSPMGSMTPFISALQST        | 901.404 | 2 | 0.000 | 1.000 |
|        |                                      | DSPMGSMTPFISALQST        | 901.403 | 2 | 0.000 | 0.981 |
|        |                                      | DSPMGSMTPFISALQST        | 901.403 | 2 | 0.002 | 0.814 |
|        |                                      | DSPMGSMTPFISALQST        | 901.906 | 2 | 0.001 | 0.908 |
|        |                                      | DSPMGSMTPFISALQST        | 901.404 | 2 | 0.000 | 0.987 |
| 442352 | Q96EQ8;                              | Peptide                  | M/z     | z | q-val | P     |
|        |                                      | IIEEALIR                 | 478.793 | 2 | 0.002 | 0.965 |
|        |                                      | IIEEALIR                 | 478.793 | 2 | 0.000 | 1.000 |
|        |                                      | IIEEALIR                 | 478.792 | 2 | 0.000 | 1.000 |
|        |                                      | IIEEALIR                 | 478.792 | 2 | 0.000 | 1.000 |
|        |                                      | IIEEALIR                 | 478.792 | 2 | 0.000 | 1.000 |
|        |                                      | IIEEALIR                 | 478.792 | 2 | 0.000 | 1.000 |
|        |                                      | IIEEALIR                 | 478.793 | 2 | 0.000 | 1.000 |
|        |                                      | IIEEALIR                 | 478.793 | 2 | 0.000 | 0.983 |
|        |                                      | IIEEALIR                 | 478.793 | 2 | 0.000 | 0.995 |
|        |                                      | IIEEALIR                 | 478.792 | 2 | 0.000 | 0.999 |
| 442382 | Q8WW35;                              | Peptide                  | M/z     | z | q-val | P     |
|        |                                      | DADTDNYTH                | 526.202 | 2 | 0.000 | 1.000 |
|        |                                      | DADTDNYTH                | 526.200 | 2 | 0.001 | 0.791 |
|        |                                      | DADTDNYTH                | 526.201 | 2 | 0.002 | 0.809 |
|        |                                      | DADTDNYTH                | 526.201 | 2 | 0.003 | 0.433 |
|        |                                      | DADTDNYTH                | 526.202 | 2 | 0.000 | 0.985 |
| 442910 | E9PCC0; Q9NY57; Q9NY57-2;            | Peptide                  | M/z     | z | q-val | P     |
|        |                                      | DIKPDNILL                | 520.803 | 2 | 0.001 | 0.949 |
|        |                                      | DIKPDNILL                | 520.803 | 2 | 0.001 | 0.973 |
|        |                                      | DIKPDNILL                | 520.803 | 2 | 0.001 | 0.970 |
|        |                                      | DIKPDNILL                | 520.803 | 2 | 0.000 | 1.000 |
|        |                                      | DIKPDNILL                | 520.803 | 2 | 0.000 | 0.991 |
|        |                                      | DIKPDNILL                | 520.803 | 2 | 0.001 | 0.936 |
|        |                                      | DIKPDNILL                | 520.803 | 2 | 0.000 | 1.000 |

| ID           | Indistinguishable (SameSet) Proteins | Peptide Spectrum Matches  |         |       |       |       |
|--------------|--------------------------------------|---------------------------|---------|-------|-------|-------|
| 444737       | Q9H5J8;                              | Peptide                   | M/z     | z     | q-val | P     |
|              |                                      | LAGDSFIVSSEFPVR           | 812.422 | 2     | 0.000 | 1.000 |
|              |                                      | LAGDSFIVSSEFPVR           | 812.425 | 2     | 0.000 | 1.000 |
|              |                                      | LAGDSFIVSSEFPVR           | 812.423 | 2     | 0.001 | 0.902 |
|              |                                      | LAGDSFIVSSEFPVR           | 812.421 | 2     | 0.001 | 0.632 |
| 444831       | Q92686;                              | Peptide                   | M/z     | z     | q-val | P     |
|              |                                      | GPGPGGGPGGAGVARGGAGGGPSGD | 909.924 | 2     | 0.000 | 1.000 |
|              |                                      | GPGPGGGPGGAGVARGGAGGGPSGD | 909.922 | 2     | 0.000 | 1.000 |
|              |                                      | GPGPGGGPGGAGVARGGAGGGPSGD | 909.928 | 2     | 0.000 | 1.000 |
| 444994       | Q16650;                              | Peptide                   | M/z     | z     | q-val | P     |
|              |                                      | LSPVLDGVSELR              | 642.861 | 2     | 0.000 | 1.000 |
|              |                                      | LSPVLDGVSELR              | 642.862 | 2     | 0.002 | 0.995 |
|              |                                      | LSPVLDGVSELR              | 642.862 | 2     | 0.000 | 0.999 |
|              |                                      | LSPVLDGVSELR              | 642.862 | 2     | 0.000 | 1.000 |
|              |                                      | LSPVLDGVSELR              | 642.862 | 2     | 0.001 | 0.999 |
|              |                                      | LSPVLDGVSELR              | 642.862 | 2     | 0.002 | 0.974 |
|              |                                      | LSPVLDGVSELR              | 642.860 | 2     | 0.001 | 0.991 |
|              |                                      | LSPVLDGVSELR              | 642.860 | 2     | 0.001 | 0.995 |
|              |                                      | LSPVLDGVSELR              | 642.862 | 2     | 0.001 | 0.991 |
|              |                                      | LSPVLDGVSELR              | 642.862 | 2     | 0.000 | 1.000 |
|              |                                      | LSPVLDGVSELR              | 642.862 | 2     | 0.000 | 1.000 |
|              |                                      | LSPVLDGVSELR              | 642.862 | 2     | 0.000 | 1.000 |
|              |                                      | LSPVLDGVSELR              | 642.863 | 2     | 0.001 | 0.998 |
|              |                                      | LSPVLDGVSELR              | 642.861 | 2     | 0.006 | 0.580 |
|              |                                      | LSPVLDGVSELR              | 642.862 | 2     | 0.000 | 1.000 |
|              |                                      | LSPVLDGVSELR              | 642.861 | 2     | 0.001 | 0.999 |
|              |                                      | LSPVLDGVSELR              | 642.862 | 2     | 0.000 | 1.000 |
|              |                                      | LSPVLDGVSELR              | 642.862 | 2     | 0.000 | 1.000 |
|              |                                      | LSPVLDGVSELR              | 642.861 | 2     | 0.003 | 0.160 |
|              |                                      | LSPVLDGVSELR              | 642.862 | 2     | 0.000 | 1.000 |
|              |                                      | LSPVLDGVSELR              | 642.862 | 2     | 0.000 | 1.000 |
|              |                                      | LSPVLDGVSELR              | 642.862 | 2     | 0.004 | 0.101 |
| LSPVLDGVSELR | 642.862                              | 2                         | 0.000   | 0.999 |       |       |
| LSPVLDGVSELR | 643.364                              | 2                         | 0.006   | 0.047 |       |       |
| 445040       | Q6ZS86; Q6ZS86-3;                    | Peptide                   | M/z     | z     | q-val | P     |
|              |                                      | DVKLTMGTGTFI              | 649.837 | 2     | 0.000 | 0.994 |
|              |                                      | DVKLTMGTGTFI              | 649.837 | 2     | 0.000 | 1.000 |
|              |                                      | DVKLTMGTGTFI              | 649.837 | 2     | 0.000 | 1.000 |
|              |                                      | DVKLTMGTGTFI              | 649.838 | 2     | 0.001 | 0.889 |

| ID     | Indistinguishable (SameSet) Proteins    | Peptide Spectrum Matches |         |   |       |       |
|--------|-----------------------------------------|--------------------------|---------|---|-------|-------|
|        |                                         | Peptide                  | M/z     | z | q-val | P     |
| 445214 | Q6PJ61;                                 | Peptide                  | M/z     | z | q-val | P     |
|        |                                         | DLYQLISPSR               | 596.323 | 2 | 0.001 | 0.925 |
|        |                                         | DLYQLISPSR               | 596.323 | 2 | 0.001 | 0.823 |
|        |                                         | DLYQLISPSR               | 596.323 | 2 | 0.000 | 1.000 |
|        |                                         | DLYQLISPSR               | 596.322 | 2 | 0.000 | 1.000 |
|        |                                         | DLYQLISPSR               | 596.322 | 2 | 0.001 | 0.885 |
| 445310 | F5H1P7; O00463;                         | Peptide                  | M/z     | z | q-val | P     |
|        |                                         | DQRLAVLEEETNKH           | 421.218 | 4 | 0.000 | 1.000 |
|        |                                         | DQRLAVLEEETNKH           | 421.218 | 4 | 0.000 | 1.000 |
|        |                                         | DQRLAVLEEETNKH           | 421.218 | 4 | 0.000 | 1.000 |
| 445320 | B8ZZ93; B8ZZH7; C9JKY0; F8WCL7; Q9C086; | Peptide                  | M/z     | z | q-val | P     |
|        |                                         | DALEKGELDDNG             | 638.290 | 2 | 0.003 | 0.364 |
|        |                                         | DALEKGELDDNG             | 638.288 | 2 | 0.001 | 0.793 |
|        |                                         | DALEKGELDDNG             | 638.288 | 2 | 0.000 | 1.000 |
| 445415 | E9PAU7; E9PAY2; Q9HAJ7;                 | Peptide                  | M/z     | z | q-val | P     |
|        |                                         | DQKSEGGKQLE              | 609.802 | 2 | 0.000 | 0.982 |
|        |                                         | DQKSEGGKQLE              | 609.801 | 2 | 0.000 | 1.000 |

| ID      | Indistinguishable (Sameset) Proteins | Peptide Spectrum Matches |         |       |       |       |
|---------|--------------------------------------|--------------------------|---------|-------|-------|-------|
|         |                                      | Peptide                  | M/z     | z     | q-val | P     |
| 445767  | O00585; Q5VZ73;                      | AILFLPR                  | 415.267 | 2     | 0.001 | 0.919 |
|         |                                      | AILFLPR                  | 415.269 | 2     | 0.001 | 0.937 |
|         |                                      | AILFLPR                  | 415.269 | 2     | 0.001 | 0.876 |
|         |                                      | AILFLPR                  | 415.269 | 2     | 0.000 | 0.998 |
|         |                                      | AILFLPR                  | 415.269 | 2     | 0.007 | 0.797 |
|         |                                      | AILFLPR                  | 415.268 | 2     | 0.001 | 0.996 |
|         |                                      | AILFLPR                  | 415.270 | 2     | 0.009 | 0.663 |
|         |                                      | AILFLPR                  | 415.269 | 2     | 0.007 | 0.656 |
|         |                                      | AILFLPR                  | 415.269 | 2     | 0.007 | 0.632 |
|         |                                      | AILFLPR                  | 415.268 | 2     | 0.007 | 0.713 |
|         |                                      | AILFLPR                  | 415.269 | 2     | 0.001 | 0.999 |
|         |                                      | AILFLPR                  | 415.268 | 2     | 0.005 | 0.807 |
|         |                                      | AILFLPR                  | 415.269 | 2     | 0.001 | 0.997 |
|         |                                      | AILFLPR                  | 415.269 | 2     | 0.001 | 0.999 |
|         |                                      | AILFLPR                  | 415.269 | 2     | 0.006 | 0.750 |
|         |                                      | AILFLPR                  | 415.269 | 2     | 0.009 | 0.781 |
|         |                                      | AILFLPR                  | 415.269 | 2     | 0.007 | 0.872 |
|         |                                      | AILFLPR                  | 415.268 | 2     | 0.008 | 0.677 |
|         |                                      | AILFLPR                  | 415.269 | 2     | 0.006 | 0.862 |
|         |                                      | AILFLPR                  | 415.268 | 2     | 0.009 | 0.658 |
|         |                                      | AILFLPR                  | 415.268 | 2     | 0.000 | 0.998 |
|         |                                      | AILFLPR                  | 415.269 | 2     | 0.007 | 0.801 |
|         |                                      | AILFLPR                  | 415.269 | 2     | 0.006 | 0.850 |
|         |                                      | AILFLPR                  | 415.269 | 2     | 0.001 | 0.999 |
|         |                                      | AILFLPR                  | 415.269 | 2     | 0.001 | 0.999 |
|         |                                      | AILFLPR                  | 415.269 | 2     | 0.009 | 0.678 |
|         |                                      | AILFLPR                  | 415.269 | 2     | 0.006 | 0.854 |
|         |                                      | AILFLPR                  | 415.268 | 2     | 0.009 | 0.789 |
|         |                                      | AILFLPR                  | 415.269 | 2     | 0.009 | 0.708 |
|         |                                      | AILFLPR                  | 415.269 | 2     | 0.006 | 0.909 |
|         |                                      | AILFLPR                  | 415.269 | 2     | 0.008 | 0.786 |
|         |                                      | AILFLPR                  | 415.269 | 2     | 0.007 | 0.773 |
|         |                                      | AILFLPR                  | 415.269 | 2     | 0.001 | 0.996 |
|         |                                      | AILFLPR                  | 415.269 | 2     | 0.001 | 0.998 |
|         |                                      | AILFLPR                  | 415.269 | 2     | 0.009 | 0.664 |
|         |                                      | AILFLPR                  | 415.269 | 2     | 0.000 | 0.999 |
| AILFLPR | 415.269                              | 2                        | 0.001   | 0.998 |       |       |
| AILFLPR | 415.269                              | 2                        | 0.002   | 0.959 |       |       |
| AILFLPR | 415.268                              | 2                        | 0.001   | 0.977 |       |       |
| AILFLPR | 415.269                              | 2                        | 0.006   | 0.839 |       |       |

| ID | Indistinguishable (Sameset) Proteins | Peptide Spectrum Matches |         |       |             |       |
|----|--------------------------------------|--------------------------|---------|-------|-------------|-------|
|    |                                      | Peptide                  | Score   | Count | Probability |       |
|    |                                      | AILFLPR                  | 415.268 | 2     | 0.001       | 0.998 |
|    |                                      | AILFLPR                  | 415.269 | 2     | 0.001       | 0.998 |
|    |                                      | AILFLPR                  | 415.269 | 2     | 0.001       | 0.999 |
|    |                                      | AILFLPR                  | 415.268 | 2     | 0.007       | 0.760 |
|    |                                      | AILFLPR                  | 415.269 | 2     | 0.008       | 0.123 |
|    |                                      | AILFLPR                  | 415.268 | 2     | 0.001       | 0.649 |
|    |                                      | AILFLPR                  | 415.269 | 2     | 0.007       | 0.151 |
|    |                                      | AILFLPR                  | 415.268 | 2     | 0.002       | 0.584 |
|    |                                      | AILFLPR                  | 415.269 | 2     | 0.010       | 0.064 |
|    |                                      | AILFLPR                  | 415.269 | 2     | 0.010       | 0.111 |
|    |                                      | AILFLPR                  | 415.269 | 2     | 0.007       | 0.766 |
|    |                                      | AILFLPR                  | 415.269 | 2     | 0.008       | 0.731 |
|    |                                      | AILFLPR                  | 415.269 | 2     | 0.007       | 0.759 |
|    |                                      | AILFLPR                  | 415.268 | 2     | 0.007       | 0.770 |
|    |                                      | AILFLPR                  | 415.269 | 2     | 0.009       | 0.747 |
|    |                                      | AILFLPR                  | 415.269 | 2     | 0.006       | 0.763 |
|    |                                      | AILFLPR                  | 415.269 | 2     | 0.000       | 0.998 |
|    |                                      | AILFLPR                  | 415.269 | 2     | 0.000       | 0.998 |
|    |                                      | AILFLPR                  | 415.269 | 2     | 0.004       | 0.866 |
|    |                                      | AILFLPR                  | 415.269 | 2     | 0.000       | 0.999 |
|    |                                      | AILFLPR                  | 415.268 | 2     | 0.001       | 0.985 |
|    |                                      | AILFLPR                  | 415.269 | 2     | 0.002       | 0.981 |
|    |                                      | AILFLPR                  | 415.269 | 2     | 0.006       | 0.214 |
|    |                                      | AILFLPR                  | 415.269 | 2     | 0.005       | 0.234 |
|    |                                      | AILFLPR                  | 415.269 | 2     | 0.005       | 0.830 |
|    |                                      | AILFLPR                  | 415.269 | 2     | 0.005       | 0.843 |
|    |                                      | AILFLPR                  | 415.268 | 2     | 0.002       | 0.981 |
|    |                                      | AILFLPR                  | 415.269 | 2     | 0.009       | 0.559 |
|    |                                      | AILFLPR                  | 415.268 | 2     | 0.010       | 0.432 |
|    |                                      | AILFLPR                  | 415.269 | 2     | 0.000       | 0.998 |
|    |                                      | AILFLPR                  | 415.269 | 2     | 0.004       | 0.848 |
|    |                                      | AILFLPR                  | 415.269 | 2     | 0.005       | 0.787 |
|    |                                      | AILFLPR                  | 415.268 | 2     | 0.000       | 0.998 |
|    |                                      | AILFLPR                  | 415.268 | 2     | 0.000       | 0.999 |
|    |                                      | AILFLPR                  | 415.269 | 2     | 0.001       | 0.989 |
|    |                                      | AILFLPR                  | 415.269 | 2     | 0.001       | 0.983 |
|    |                                      | AILFLPR                  | 415.269 | 2     | 0.001       | 0.998 |
|    |                                      | AILFLPR                  | 415.268 | 2     | 0.000       | 0.999 |
|    |                                      | AILFLPR                  | 415.268 | 2     | 0.000       | 0.997 |
|    |                                      | AILFLPR                  | 415.268 | 2     | 0.000       | 0.999 |
|    |                                      | AILFLPR                  | 415.268 | 2     | 0.000       | 0.999 |

| ID | Indistinguishable (SameSet) Proteins | Peptide Spectrum Matches |         |       |             |       |
|----|--------------------------------------|--------------------------|---------|-------|-------------|-------|
|    |                                      | Peptide                  | Count   | Score | Probability |       |
|    |                                      | AILFLPR                  | 415.268 | 2     | 0.000       | 1.000 |
|    |                                      | AILFLPR                  | 415.268 | 2     | 0.000       | 0.998 |
|    |                                      | AILFLPR                  | 415.268 | 2     | 0.000       | 0.996 |
|    |                                      | AILFLPR                  | 415.268 | 2     | 0.001       | 0.978 |
|    |                                      | AILFLPR                  | 415.268 | 2     | 0.000       | 0.998 |
|    |                                      | AILFLPR                  | 415.268 | 2     | 0.000       | 1.000 |
|    |                                      | AILFLPR                  | 415.268 | 2     | 0.000       | 0.998 |
|    |                                      | AILFLPR                  | 415.268 | 2     | 0.001       | 0.700 |
|    |                                      | AILFLPR                  | 415.268 | 2     | 0.000       | 0.999 |
|    |                                      | AILFLPR                  | 415.268 | 2     | 0.000       | 1.000 |
|    |                                      | AILFLPR                  | 415.269 | 2     | 0.000       | 1.000 |
|    |                                      | AILFLPR                  | 415.268 | 2     | 0.000       | 0.999 |
|    |                                      | AILFLPR                  | 415.268 | 2     | 0.000       | 0.999 |
|    |                                      | AILFLPR                  | 415.268 | 2     | 0.000       | 1.000 |
|    |                                      | AILFLPR                  | 415.268 | 2     | 0.000       | 1.000 |
|    |                                      | AILFLPR                  | 415.268 | 2     | 0.000       | 0.998 |
|    |                                      | AILFLPR                  | 415.268 | 2     | 0.000       | 0.999 |
|    |                                      | AILFLPR                  | 415.268 | 2     | 0.000       | 0.998 |
|    |                                      | AILFLPR                  | 415.268 | 2     | 0.000       | 0.994 |
|    |                                      | AILFLPR                  | 415.268 | 2     | 0.001       | 0.976 |
|    |                                      | AILFLPR                  | 415.268 | 2     | 0.000       | 1.000 |
|    |                                      | AILFLPR                  | 415.268 | 2     | 0.000       | 1.000 |
|    |                                      | AILFLPR                  | 415.268 | 2     | 0.000       | 1.000 |
|    |                                      | AILFLPR                  | 415.268 | 2     | 0.000       | 1.000 |
|    |                                      | AILFLPR                  | 415.268 | 2     | 0.000       | 1.000 |
|    |                                      | AILFLPR                  | 415.268 | 2     | 0.000       | 1.000 |
|    |                                      | AILFLPR                  | 415.268 | 2     | 0.000       | 0.999 |
|    |                                      | AILFLPR                  | 415.268 | 2     | 0.001       | 0.978 |
|    |                                      | AILFLPR                  | 415.268 | 2     | 0.001       | 0.917 |
|    |                                      | AILFLPR                  | 415.268 | 2     | 0.001       | 0.843 |
|    |                                      | AILFLPR                  | 415.268 | 2     | 0.001       | 0.907 |
|    |                                      | AILFLPR                  | 415.268 | 2     | 0.001       | 0.802 |
|    |                                      | AILFLPR                  | 415.268 | 2     | 0.001       | 0.910 |
|    |                                      | AILFLPR                  | 415.268 | 2     | 0.001       | 0.954 |
|    |                                      | AILFLPR                  | 415.268 | 2     | 0.001       | 0.861 |
|    |                                      | AILFLPR                  | 415.268 | 2     | 0.001       | 0.934 |
|    |                                      | AILFLPR                  | 415.268 | 2     | 0.001       | 0.809 |
|    |                                      | AILFLPR                  | 415.268 | 2     | 0.001       | 0.941 |
|    |                                      | AILFLPR                  | 415.268 | 2     | 0.001       | 0.843 |
|    |                                      | AILFLPR                  | 415.268 | 2     | 0.001       | 0.943 |
|    |                                      | AILFLPR                  | 415.268 | 2     | 0.001       | 0.927 |

| ID                  | Indistinguishable (SameSet) Proteins                        | Peptide Spectrum Matches |         |       |       |       |
|---------------------|-------------------------------------------------------------|--------------------------|---------|-------|-------|-------|
|                     |                                                             | Peptide                  | M/z     | z     | q-val | P     |
|                     |                                                             | AILFLPR                  | 415.268 | 2     | 0.000 | 0.992 |
|                     |                                                             | AILFLPR                  | 415.268 | 2     | 0.001 | 0.935 |
|                     |                                                             | AILFLPR                  | 415.268 | 2     | 0.001 | 0.784 |
|                     |                                                             | AILFLPR                  | 415.268 | 2     | 0.001 | 0.959 |
|                     |                                                             | AILFLPR                  | 415.268 | 2     | 0.000 | 0.986 |
|                     |                                                             | AILFLPR                  | 415.268 | 2     | 0.000 | 0.986 |
|                     |                                                             | AILFLPR                  | 415.268 | 2     | 0.001 | 0.873 |
|                     |                                                             | AILFLPR                  | 415.268 | 2     | 0.001 | 0.943 |
| 446179              | C9JHN9; O00182; O00182-2; Q3B8N2; Q3B8N2-2; Q6DKI2; Q8WYQ7; | Peptide                  | M/z     | z     | q-val | P     |
|                     |                                                             | DIQLTHVQT                | 527.780 | 2     | 0.001 | 0.888 |
|                     |                                                             | DIQLTHVQT                | 527.780 | 2     | 0.001 | 0.779 |
|                     |                                                             | DIQLTHVQT                | 527.779 | 2     | 0.000 | 1.000 |
| 446187              | Q9HB65;                                                     | Peptide                  | M/z     | z     | q-val | P     |
|                     |                                                             | AIHSAEQQHAYEQDFETDYAEYR  | 701.560 | 4     | 0.002 | 0.337 |
|                     |                                                             | AIHSAEQQHAYEQDFETDYAEYR  | 701.057 | 4     | 0.000 | 1.000 |
| 446254              | E9PIE2;                                                     | Peptide                  | M/z     | z     | q-val | P     |
|                     |                                                             | NFVATLANGMSLQPPLLEE      | 965.982 | 2     | 0.007 | 0.922 |
|                     |                                                             | NFVATLANGMSLQPPLLEE      | 966.487 | 2     | 0.003 | 0.991 |
|                     |                                                             | NFVATLANGMSLQPPLLEE      | 965.982 | 2     | 0.000 | 1.000 |
|                     |                                                             | NFVATLANGMSLQPPLLEE      | 965.984 | 2     | 0.000 | 1.000 |
|                     |                                                             | NFVATLANGMSLQPPLLEE      | 965.983 | 2     | 0.000 | 1.000 |
|                     |                                                             | NFVATLANGMSLQPPLLEE      | 965.983 | 2     | 0.002 | 0.998 |
|                     |                                                             | NFVATLANGMSLQPPLLEE      | 965.982 | 2     | 0.002 | 0.996 |
|                     |                                                             | NFVATLANGMSLQPPLLEE      | 965.985 | 2     | 0.002 | 0.984 |
|                     |                                                             | NFVATLANGMSLQPPLLEE      | 965.979 | 2     | 0.005 | 0.859 |
|                     |                                                             | NFVATLANGMSLQPPLLEE      | 965.983 | 2     | 0.000 | 1.000 |
|                     |                                                             | NFVATLANGMSLQPPLLEE      | 965.985 | 2     | 0.005 | 0.995 |
|                     |                                                             | NFVATLANGMSLQPPLLEE      | 965.984 | 2     | 0.000 | 1.000 |
|                     |                                                             | NFVATLANGMSLQPPLLEE      | 965.983 | 2     | 0.000 | 1.000 |
|                     |                                                             | NFVATLANGMSLQPPLLEE      | 965.985 | 2     | 0.000 | 1.000 |
|                     |                                                             | NFVATLANGMSLQPPLLEE      | 965.982 | 2     | 0.006 | 0.911 |
|                     |                                                             | NFVATLANGMSLQPPLLEE      | 973.981 | 2     | 0.006 | 0.934 |
|                     |                                                             | NFVATLANGMSLQPPLLEE      | 973.982 | 2     | 0.007 | 0.913 |
|                     |                                                             | NFVATLANGMSLQPPLLEE      | 973.981 | 2     | 0.005 | 0.964 |
|                     |                                                             | NFVATLANGMSLQPPLLEE      | 973.980 | 2     | 0.006 | 0.931 |
| NFVATLANGMSLQPPLLEE | 973.981                                                     | 2                        | 0.010   | 0.758 |       |       |
| 446404              | Q8WYZ0; Q9NRY6;                                             | Peptide                  | M/z     | z     | q-val | P     |
|                     |                                                             | FLVQIDQILIHQKAERVE       | 545.561 | 4     | 0.000 | 1.000 |



| ID           | Indistinguishable (SameSet) Proteins             | Peptide Spectrum Matches |         |       |       |       |
|--------------|--------------------------------------------------|--------------------------|---------|-------|-------|-------|
| 446414       | Q5QPG6; Q9BUV8; Q9BUV8-2;<br>Q9BUV8-3; Q9BUV8-4; | Peptide                  | M/z     | z     | q-val | P     |
|              |                                                  | RKEEPPQPQLANGALK         | 592.999 | 3     | 0.007 | 0.688 |
|              |                                                  | RKEEPPQPQLANGALK         | 592.665 | 3     | 0.002 | 0.988 |
|              |                                                  | RKEEPPQPQLANGALK         | 592.665 | 3     | 0.005 | 0.888 |
|              |                                                  | RKEEPPQPQLANGALK         | 592.664 | 3     | 0.001 | 0.996 |
|              |                                                  | RKEEPPQPQLANGALK         | 592.664 | 3     | 0.006 | 0.042 |
|              |                                                  | RKEEPPQPQLANGALK         | 592.663 | 3     | 0.000 | 1.000 |
|              |                                                  | RKEEPPQPQLANGALK         | 592.664 | 3     | 0.000 | 1.000 |
| 446443       | O14668;                                          | Peptide                  | M/z     | z     | q-val | P     |
|              |                                                  | DSSGLSPGFLGYVVGRS        | 849.430 | 2     | 0.000 | 0.998 |
|              |                                                  | DSSGLSPGFLGYVVGRS        | 849.427 | 2     | 0.000 | 0.997 |
|              |                                                  | DSSGLSPGFLGYVVGRS        | 849.430 | 2     | 0.010 | 0.089 |
|              |                                                  | DSSGLSPGFLGYVVGRS        | 849.427 | 2     | 0.000 | 0.995 |
|              |                                                  | DSSGLSPGFLGYVVGRS        | 849.427 | 2     | 0.000 | 0.981 |
|              |                                                  | DSSGLSPGFLGYVVGRS        | 849.428 | 2     | 0.000 | 1.000 |
|              |                                                  | DSSGLSPGFLGYVVGRS        | 849.427 | 2     | 0.000 | 1.000 |
|              |                                                  | DSSGLSPGFLGYVVGRS        | 849.427 | 2     | 0.001 | 0.752 |
|              |                                                  | DSSGLSPGFLGYVVGRS        | 849.428 | 2     | 0.000 | 1.000 |
|              |                                                  | DSSGLSPGFLGYVVGRS        | 849.431 | 2     | 0.000 | 1.000 |
|              |                                                  | DSSGLSPGFLGYVVGRS        | 849.429 | 2     | 0.001 | 0.856 |
|              |                                                  | DSSGLSPGFLGYVVGRS        | 849.430 | 2     | 0.000 | 1.000 |
|              |                                                  | DSSGLSPGFLGYVVGRS        | 849.430 | 2     | 0.000 | 0.978 |
|              |                                                  | DSSGLSPGFLGYVVGRS        | 849.429 | 2     | 0.000 | 1.000 |
|              |                                                  | DSSGLSPGFLGYVVGRS        | 850.430 | 2     | 0.005 | 0.237 |
|              |                                                  | DSSGLSPGFLGYVVGRS        | 849.932 | 2     | 0.009 | 0.127 |
| 446565       | O95631;                                          | Peptide                  | M/z     | z     | q-val | P     |
|              |                                                  | LHTFGDENEDDSELAR         | 616.606 | 3     | 0.000 | 1.000 |
|              |                                                  | LHTFGDENEDDSELAR         | 616.607 | 3     | 0.000 | 1.000 |
|              |                                                  | LHTFGDENEDDSELAR         | 616.607 | 3     | 0.000 | 1.000 |
| 446588       | B1AHJ6; B1AHJ7; O60704;                          | Peptide                  | M/z     | z     | q-val | P     |
|              |                                                  | AMPLIFVGGVPR             | 636.860 | 2     | 0.001 | 0.754 |
|              |                                                  | AMPLIFVGGVPR             | 636.860 | 2     | 0.000 | 1.000 |
|              |                                                  | AMPLIFVGGVPR             | 636.860 | 2     | 0.000 | 0.998 |
|              |                                                  | AMPLIFVGGVPR             | 636.860 | 2     | 0.000 | 0.993 |
|              |                                                  | AMPLIFVGGVPR             | 636.860 | 2     | 0.003 | 0.202 |
|              |                                                  | AMPLIFVGGVPR             | 636.860 | 2     | 0.000 | 0.997 |
|              |                                                  | AMPLIFVGGVPR             | 636.861 | 2     | 0.000 | 1.000 |
|              |                                                  | AMPLIFVGGVPR             | 636.861 | 2     | 0.001 | 0.571 |
| AMPLIFVGGVPR | 636.859                                          | 2                        | 0.004   | 0.119 |       |       |

| ID              | Indistinguishable (Sameset) Proteins    | Peptide Spectrum Matches |         |       |       |       |
|-----------------|-----------------------------------------|--------------------------|---------|-------|-------|-------|
|                 |                                         | Peptide                  | M/z     | z     | q-val | P     |
| 446604          | G3V1K2; Q9Y2B1;                         | Peptide                  | M/z     | z     | q-val | P     |
|                 |                                         | SMGAPFIFIK               | 563.802 | 2     | 0.001 | 0.847 |
|                 |                                         | SMGAPFIFIK               | 563.802 | 2     | 0.000 | 1.000 |
|                 |                                         | SMGAPFIFIK               | 563.802 | 2     | 0.000 | 0.999 |
|                 |                                         | SMGAPFIFIK               | 563.802 | 2     | 0.001 | 0.938 |
|                 |                                         | SMGAPFIFIK               | 564.304 | 2     | 0.001 | 0.946 |
|                 |                                         | SMGAPFIFIK               | 563.802 | 2     | 0.000 | 0.991 |
|                 |                                         | SMGAPFIFIK               | 563.802 | 2     | 0.000 | 1.000 |
|                 |                                         | SMGAPFIFIK               | 563.802 | 2     | 0.001 | 0.982 |
|                 |                                         | SMGAPFIFIK               | 564.303 | 2     | 0.001 | 0.959 |
|                 |                                         | SMGAPFIFIK               | 563.802 | 2     | 0.001 | 0.731 |
|                 |                                         | SMGAPFIFIK               | 563.803 | 2     | 0.001 | 0.966 |
|                 |                                         | SMGAPFIFIK               | 563.802 | 2     | 0.000 | 0.992 |
|                 |                                         | SMGAPFIFIK               | 563.802 | 2     | 0.001 | 0.925 |
|                 |                                         | SMGAPFIFIK               | 563.802 | 2     | 0.001 | 0.990 |
|                 |                                         | SMGAPFIFIK               | 563.302 | 2     | 0.006 | 0.064 |
|                 |                                         | SMGAPFIFIK               | 563.801 | 2     | 0.000 | 0.967 |
|                 |                                         | SMGAPFIFIK               | 563.803 | 2     | 0.001 | 0.568 |
|                 |                                         | SMGAPFIFIK               | 563.801 | 2     | 0.006 | 0.069 |
|                 |                                         | SMGAPFIFIK               | 563.802 | 2     | 0.002 | 0.424 |
| SMGAPFIFIK      | 563.802                                 | 2                        | 0.001   | 0.764 |       |       |
| 446610          | Q9P2J9;                                 | Peptide                  | M/z     | z     | q-val | P     |
|                 |                                         | HAIGNNEYGEMEAER          | 579.585 | 3     | 0.000 | 1.000 |
|                 |                                         | HAIGNNEYGEMEAER          | 579.251 | 3     | 0.000 | 1.000 |
|                 |                                         | HAIGNNEYGEMEAER          | 579.254 | 3     | 0.001 | 0.841 |
|                 |                                         | HAIGNNEYGEMEAER          | 579.250 | 3     | 0.000 | 0.998 |
|                 |                                         | HAIGNNEYGEMEAER          | 579.251 | 3     | 0.001 | 0.923 |
|                 |                                         | HAIGNNEYGEMEAER          | 579.250 | 3     | 0.000 | 1.000 |
| 446613          | B7WNH4; E9PLH2; E9PNA8; E9PP42; Q9BQ49; | Peptide                  | M/z     | z     | q-val | P     |
|                 |                                         | DTQGFGEESREPSTG          | 798.842 | 2     | 0.005 | 0.230 |
|                 |                                         | DTQGFGEESREPSTG          | 798.841 | 2     | 0.001 | 0.963 |
|                 |                                         | DTQGFGEESREPSTG          | 798.842 | 2     | 0.001 | 0.923 |
|                 |                                         | DTQGFGEESREPSTG          | 798.843 | 2     | 0.000 | 1.000 |
|                 |                                         | DTQGFGEESREPSTG          | 798.843 | 2     | 0.000 | 1.000 |
|                 |                                         | DTQGFGEESREPSTG          | 798.843 | 2     | 0.000 | 1.000 |
|                 |                                         | DTQGFGEESREPSTG          | 798.842 | 2     | 0.000 | 1.000 |
|                 |                                         | DTQGFGEESREPSTG          | 798.843 | 2     | 0.000 | 1.000 |
|                 |                                         | DTQGFGEESREPSTG          | 799.344 | 2     | 0.001 | 0.929 |
| DTQGFGEESREPSTG | 798.842                                 | 2                        | 0.000   | 1.000 |       |       |

Not Modified  
 Identified in MSS485 with qvalue 0.00  
 Charge: 3, Exp. m/z: 620.345, Calc. m/z: 620.347  
 Data File: HeLa\_LysC\_80pcACN\_HCD\_3, Scans: 36026 - 36026

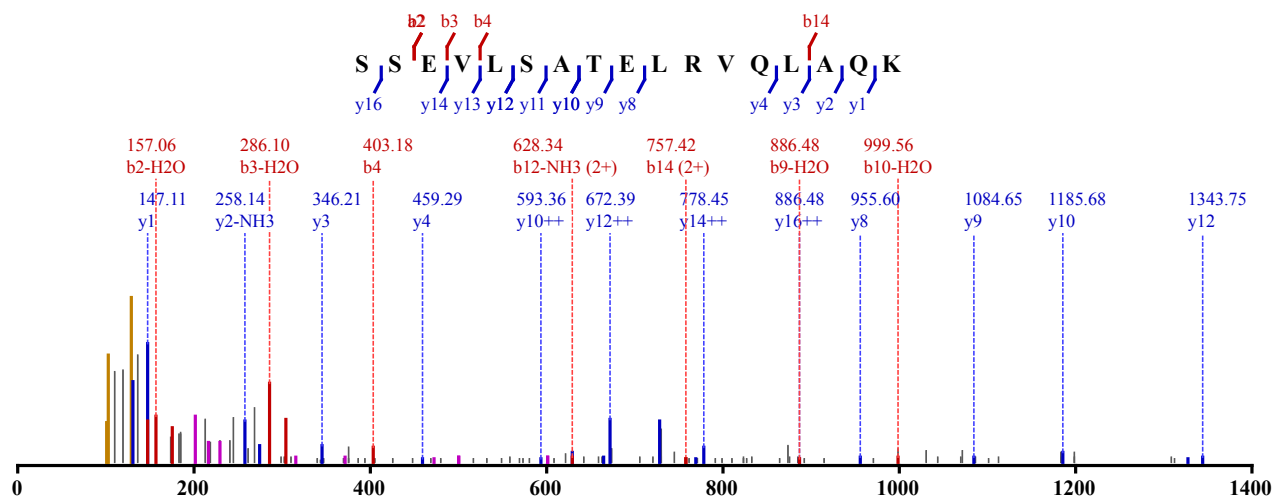

Not Modified  
 Identified in MSS128 with qvalue 0.00  
 Charge: 3, Exp. m/z: 448.209, Calc. m/z: 448.211  
 Data File: HeLa\_AspN\_HCD\_1, Scans: 7654 - 7654

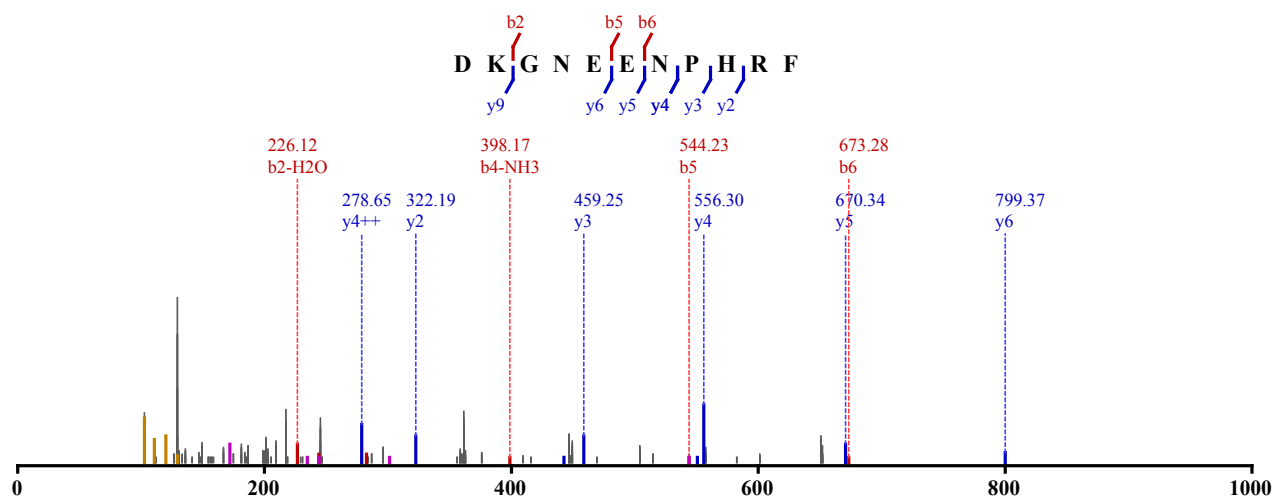

Not Modified  
 Identified in MSS479 with qvalue 0.00  
 Charge: 3, Exp. m/z: 448.210, Calc. m/z: 448.211  
 Data File: HeLa\_AspN\_pH11\_HCD\_1, Scans: 7301 - 7301

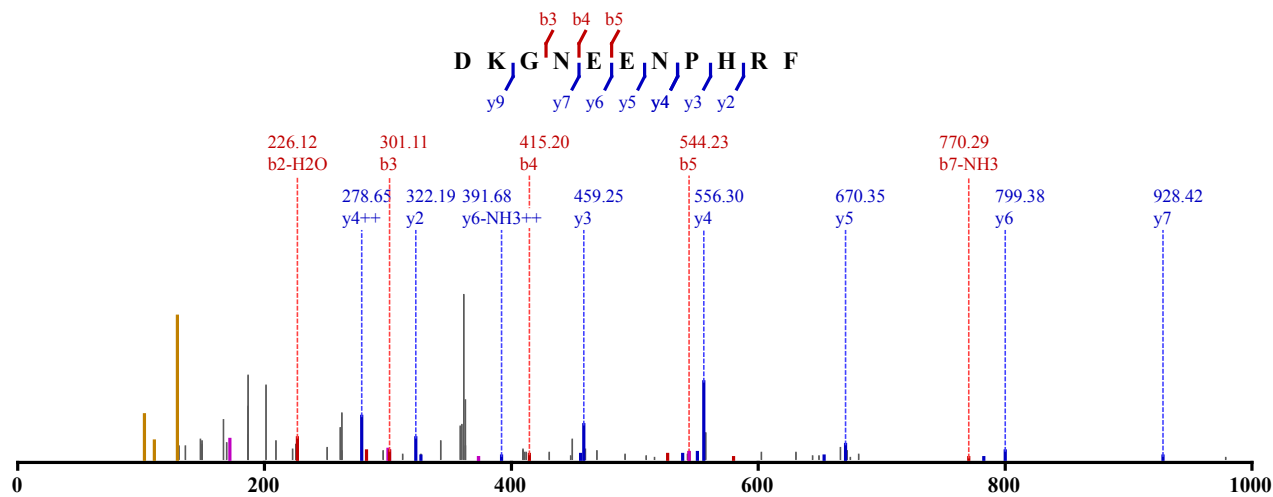

Not Modified

Identified in MSS479 with qvalue 0.00

Charge: 3, Exp. m/z: 448.209, Calc. m/z: 448.211

Data File: HeLa\_AspN\_pH11\_HCD\_3, Scans: 6028 - 6028

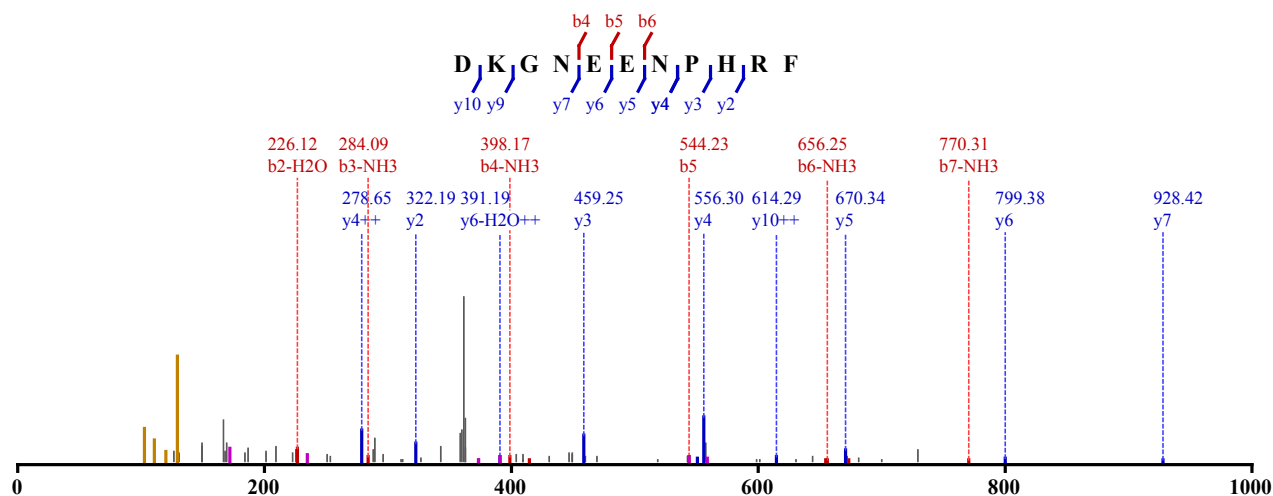

Not Modified

Identified in MSS479 with qvalue 0.00

Charge: 3, Exp. m/z: 448.209, Calc. m/z: 448.211

Data File: HeLa\_AspN\_pH11\_HCD\_2, Scans: 6104 - 6104

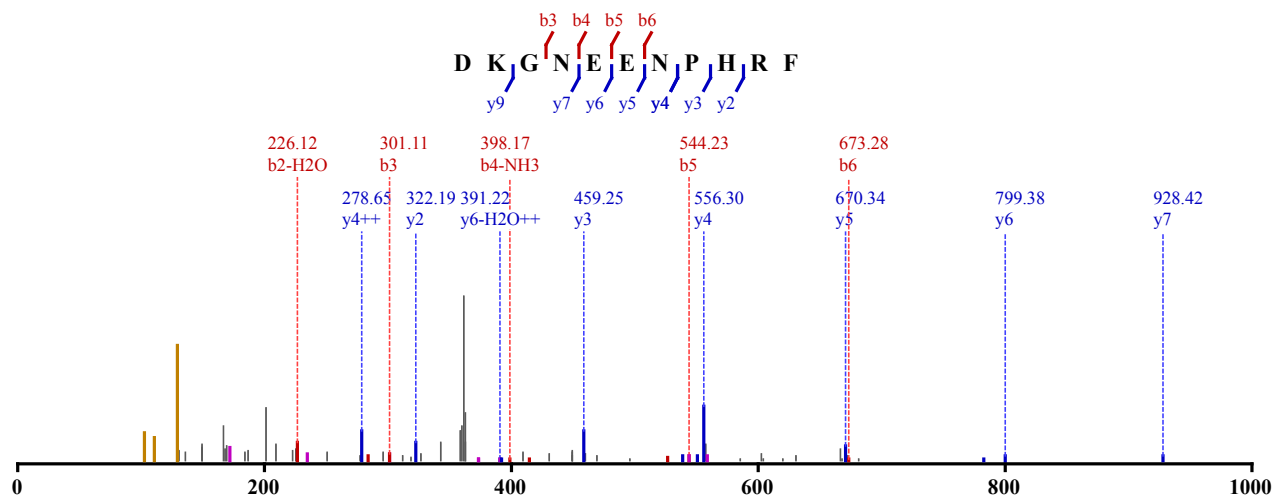

2 x Oxidation (M)

Identified in MSS480 with qvalue 0.00

Charge: 2, Exp. m/z: 861.471, Calc. m/z: 861.467

Data File: HeLa\_try\_80pcACN\_CID\_3xload\_2, Scans: 45371 - 45371

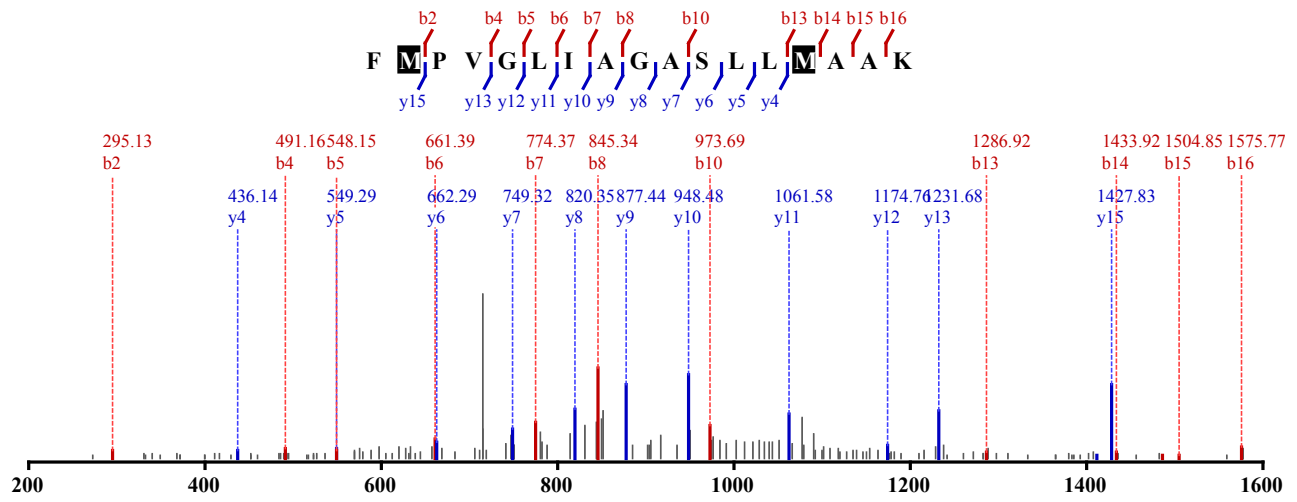

2 x Oxidation (M)

Identified in MSS480 with qvalue 0.00

Charge: 3, Exp. m/z: 574.650, Calc. m/z: 574.651

Data File: HeLa\_try\_80pcACN\_CID\_3xload, Scans: 49427 - 49427

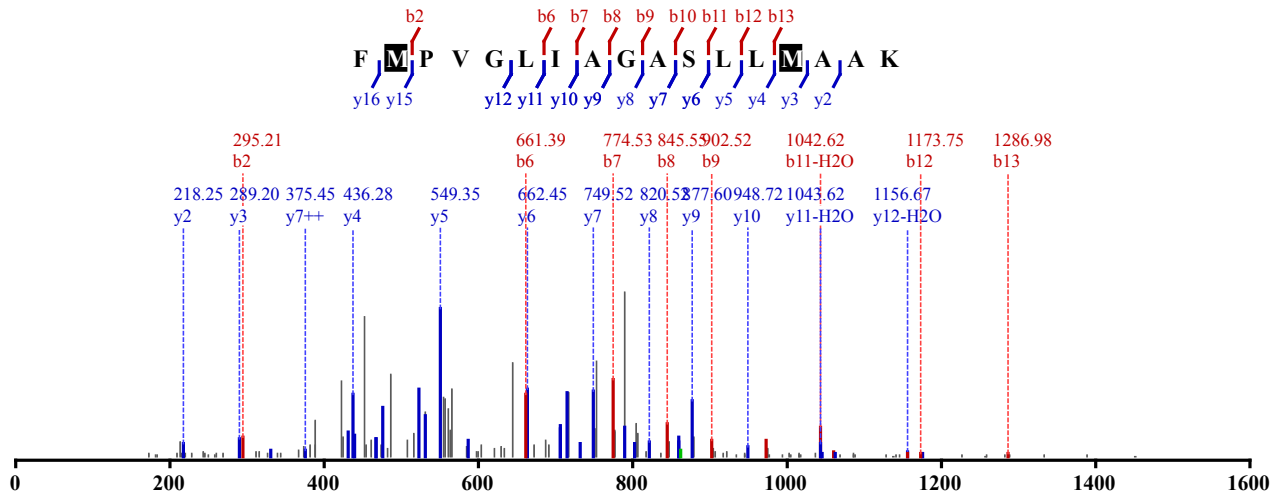

2 x Oxidation (M)

Identified in MSS480 with qvalue 0.00

Charge: 2, Exp. m/z: 861.475, Calc. m/z: 861.472

Data File: HeLa\_try\_80pcACN\_CID\_3xload, Scans: 49447 - 49447

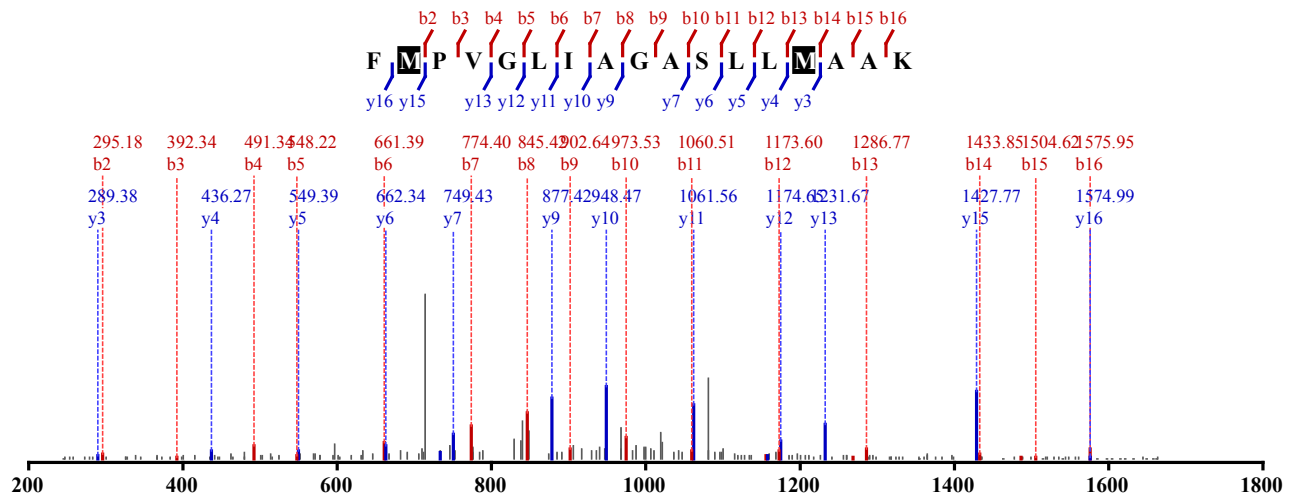

2 x Oxidation (M)

Identified in MSS484 with qvalue 0.00  
 Charge: 2, Exp. m/z: 861.471, Calc. m/z: 861.472  
 Data File: HeLa\_Try\_80pcACN\_HCD\_1, Scans: 56805 - 56805

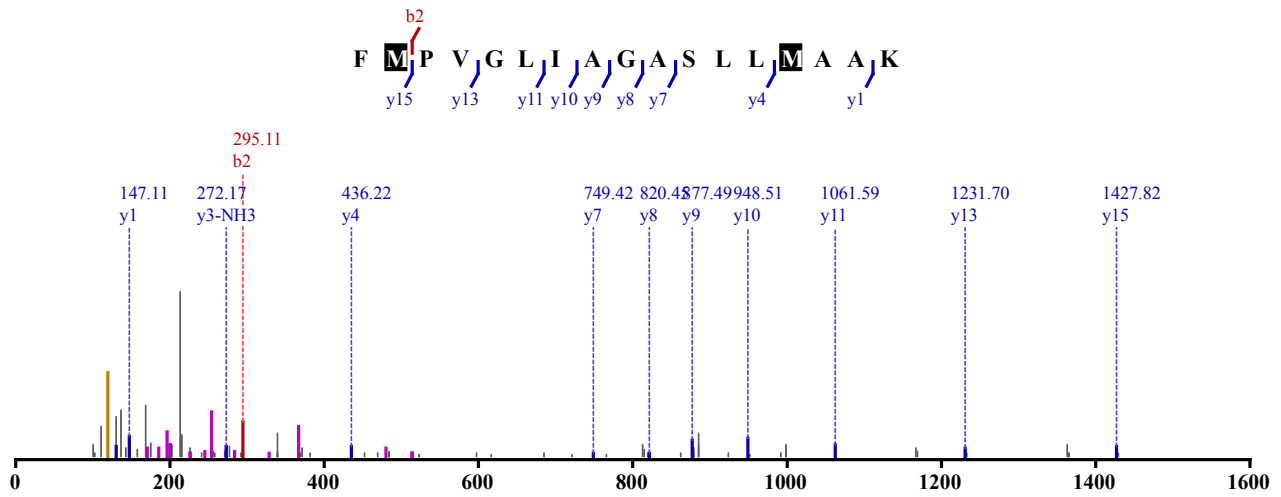

2 x Oxidation (M)  
 Identified in MSS484 with qvalue 0.00  
 Charge: 3, Exp. m/z: 574.649, Calc. m/z: 574.651  
 Data File: HeLa\_Try\_80pcACN\_HCD\_1, Scans: 56736 - 56736

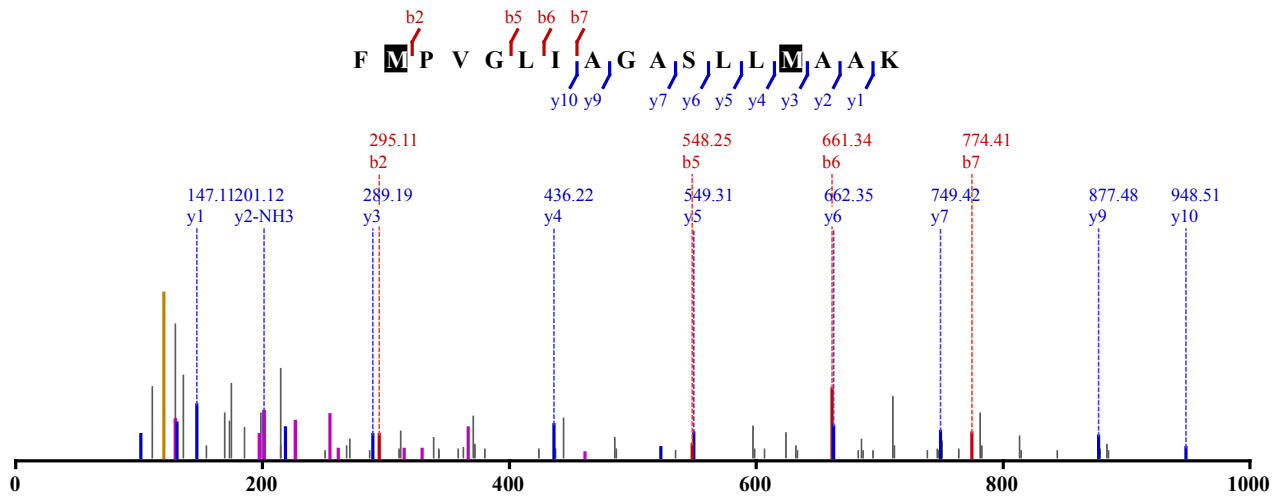

2 x Oxidation (M)  
 Identified in MSS484 with qvalue 0.00  
 Charge: 3, Exp. m/z: 574.649, Calc. m/z: 574.651  
 Data File: HeLa\_Try\_80pcACN\_HCD\_2, Scans: 56438 - 56438

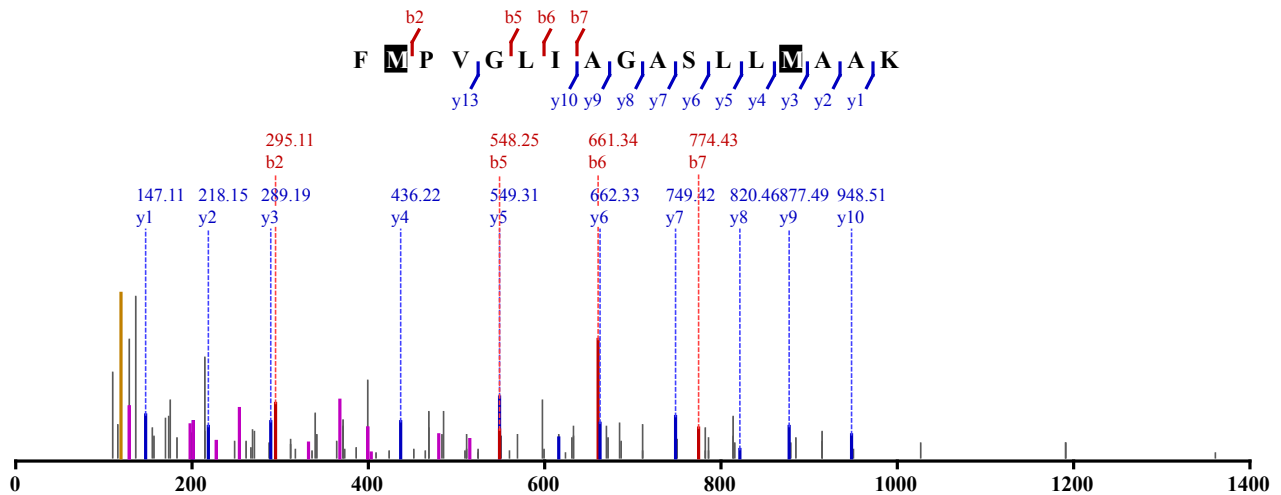

2 x Oxidation (M)

Identified in MSS484 with qvalue 0.00

Charge: 2, Exp. m/z: 861.471, Calc. m/z: 861.472

Data File: HeLa\_Try\_80pcACN\_HCD\_3, Scans: 54759 - 54759

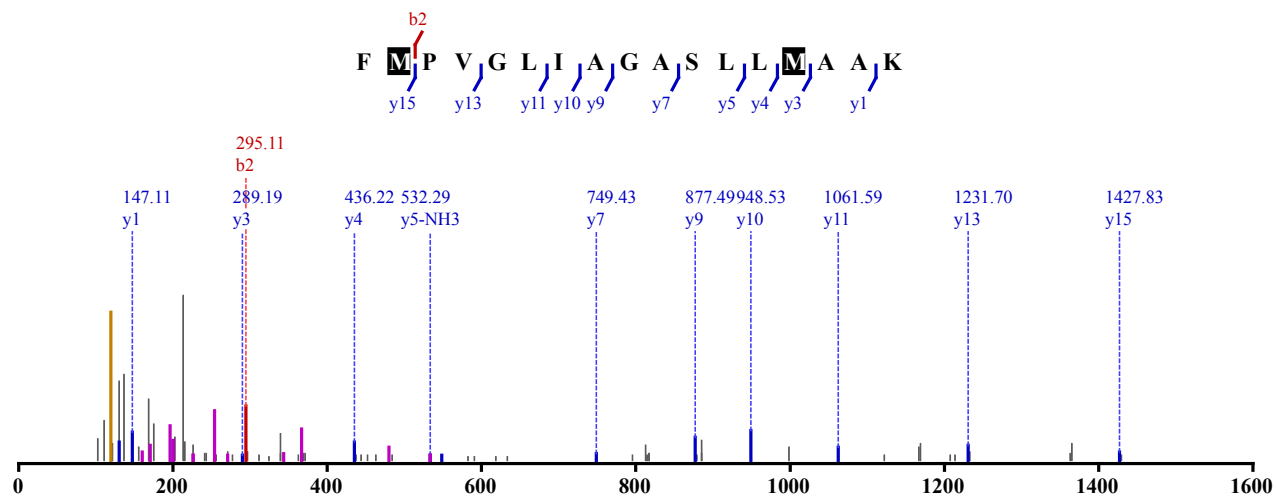

2 x Oxidation (M)

Identified in MSS484 with qvalue 0.00

Charge: 2, Exp. m/z: 861.471, Calc. m/z: 861.467

Data File: HeLa\_Try\_80pcACN\_HCD\_1, Scans: 56734 - 56734

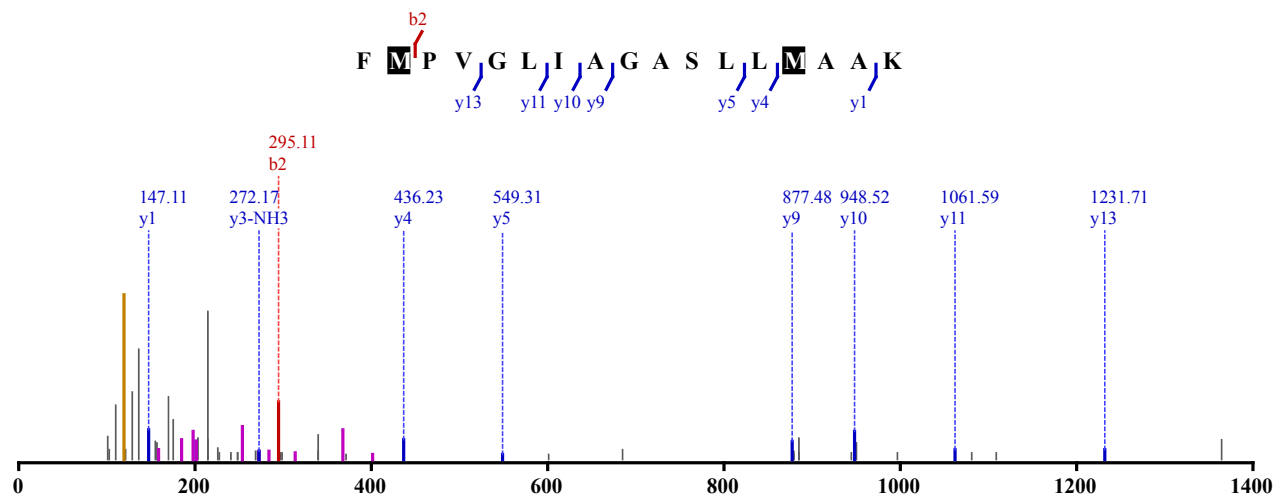

2 x Oxidation (M)

Identified in MSS484 with qvalue 0.00

Charge: 3, Exp. m/z: 574.650, Calc. m/z: 574.647

Data File: HeLa\_Try\_80pcACN\_HCD\_1, Scans: 56818 - 56818

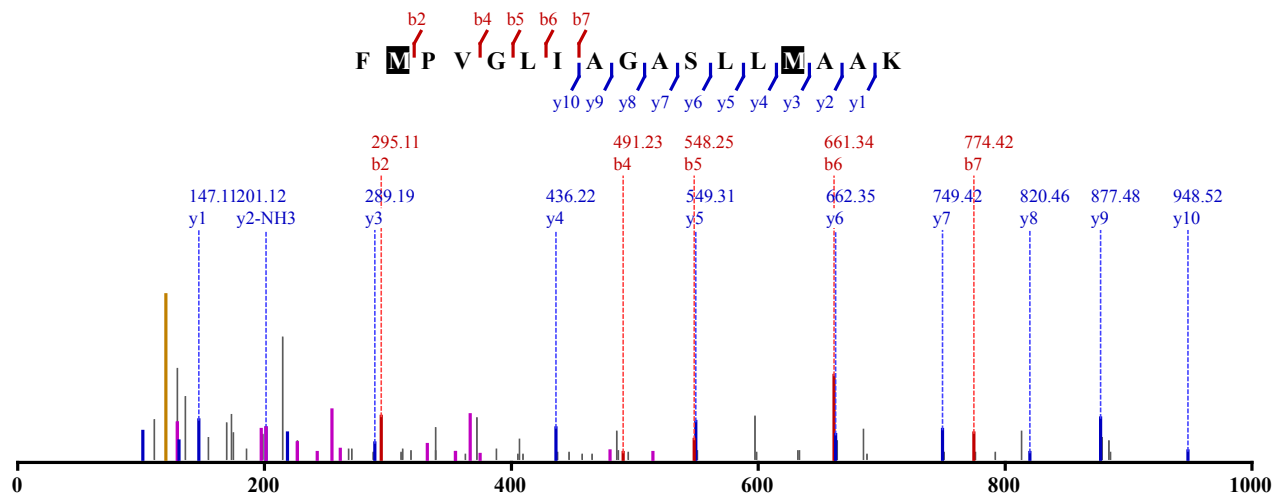

2 x Oxidation (M)

Identified in MSS484 with qvalue 0.01

Charge: 2, Exp. m/z: 861.473, Calc. m/z: 861.467

Data File: HeLa\_Try\_80pcACN\_HCD\_2, Scans: 56428 - 56428

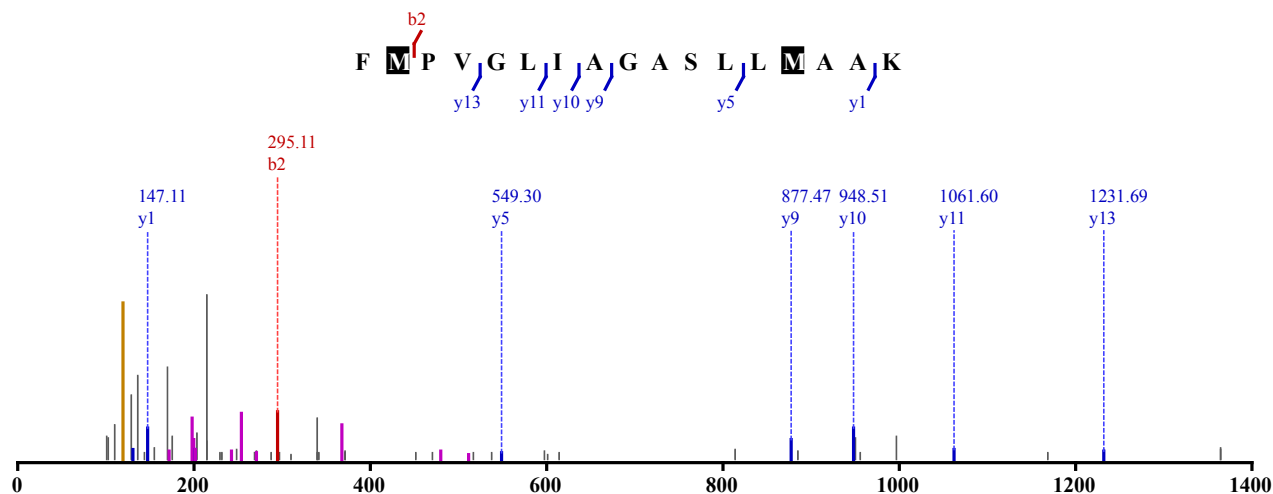

2 x Oxidation (M)

Identified in MSS488 with qvalue 0.00

Charge: 3, Exp. m/z: 574.649, Calc. m/z: 574.647

Data File: HeLa\_chy-try\_80pcACN\_CID\_3xload, Scans: 63829 - 63829

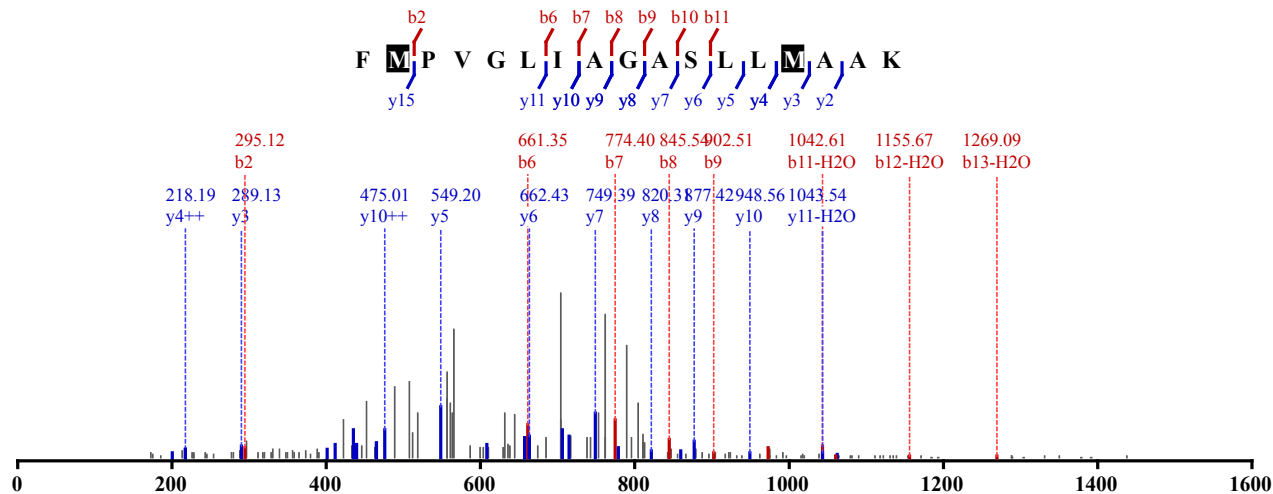

Not Modified

Identified in MSS482 with qvalue 0.00

Charge: 2, Exp. m/z: 794.895, Calc. m/z: 794.897



Data File: HeLa\_GluC\_pH4\_CID\_3xload\_2, Scans: 12325 - 12325

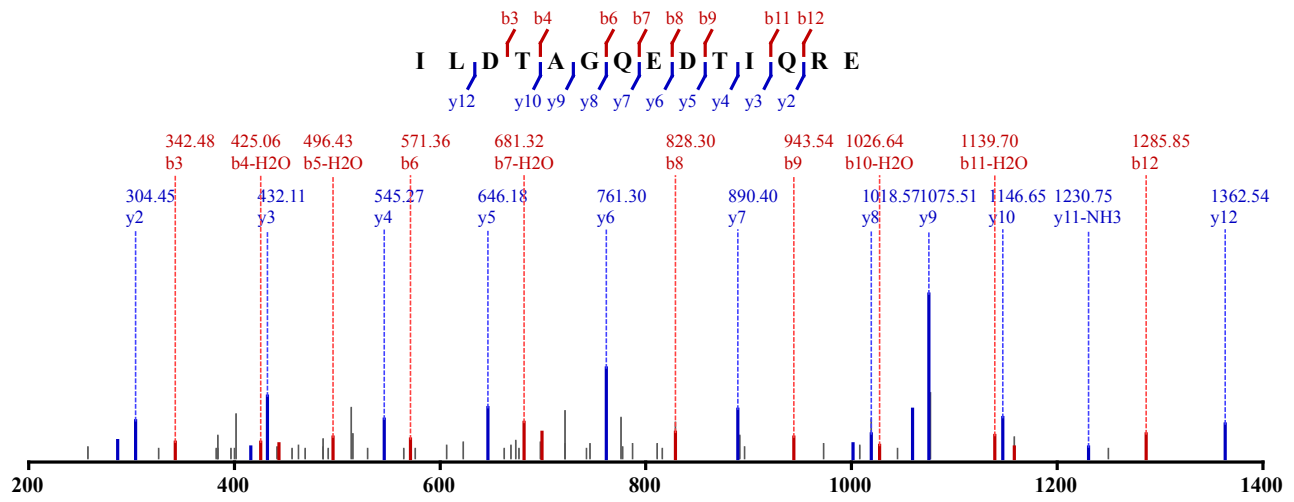

Not Modified

Identified in MSS482 with qvalue 0.00

Charge: 2, Exp. m/z: 794.896, Calc. m/z: 794.897

Data File: HeLa\_GluC\_pH4\_CID\_3xload\_3, Scans: 12175 - 12175

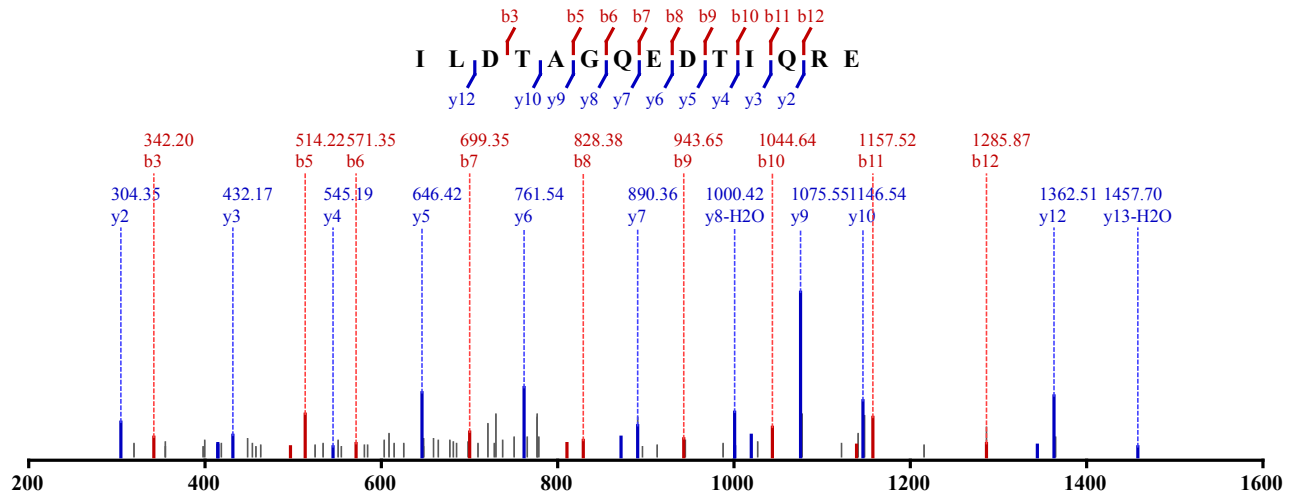

Not Modified

Identified in MSS482 with qvalue 0.00

Charge: 2, Exp. m/z: 794.895, Calc. m/z: 794.897

Data File: HeLa\_GluC\_pH4\_CID\_3xload\_3, Scans: 12239 - 12239

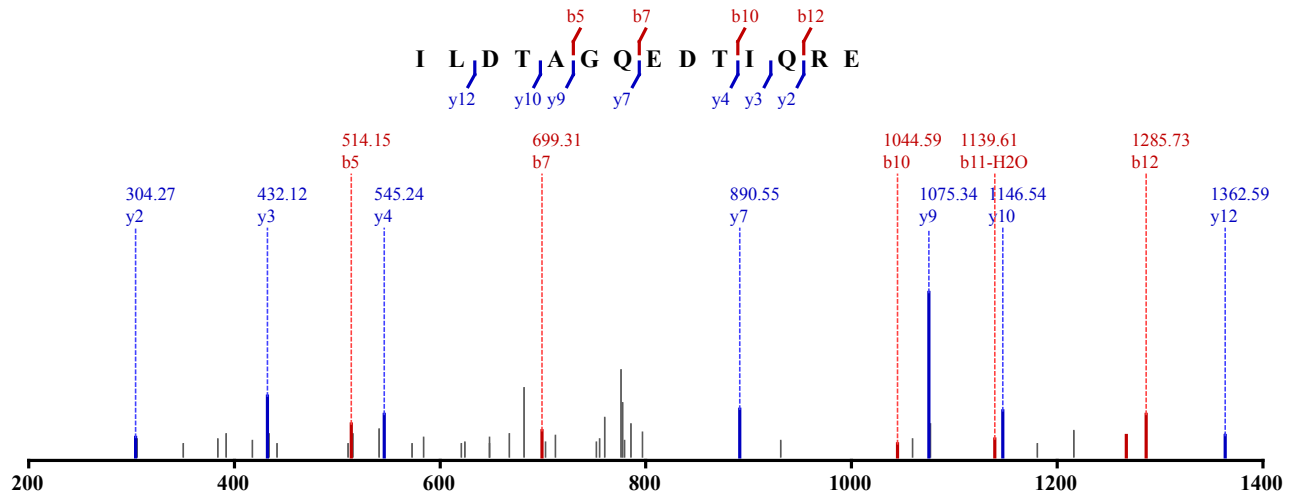

Not Modified

Identified in MSS482 with qvalue 0.00  
 Charge: 2, Exp. m/z: 794.895, Calc. m/z: 794.897  
 Data File: HeLa\_GluC\_pH4\_CID\_3xload, Scans: 11952 - 11952

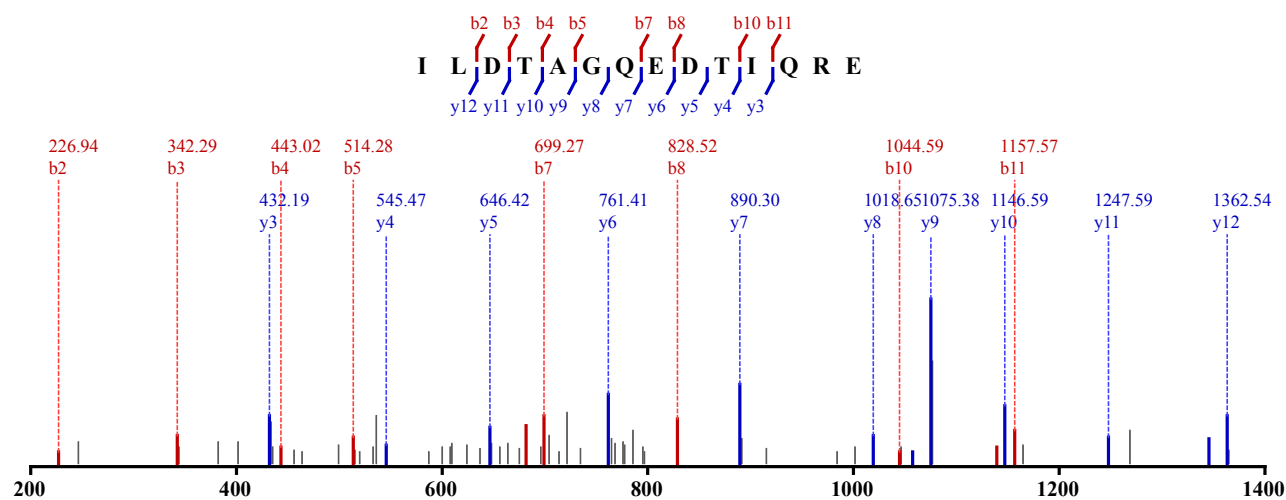

Not Modified  
 Identified in MSS482 with qvalue 0.00  
 Charge: 2, Exp. m/z: 794.895, Calc. m/z: 794.897  
 Data File: HeLa\_GluC\_pH5\_CID\_3xload\_2, Scans: 12430 - 12430

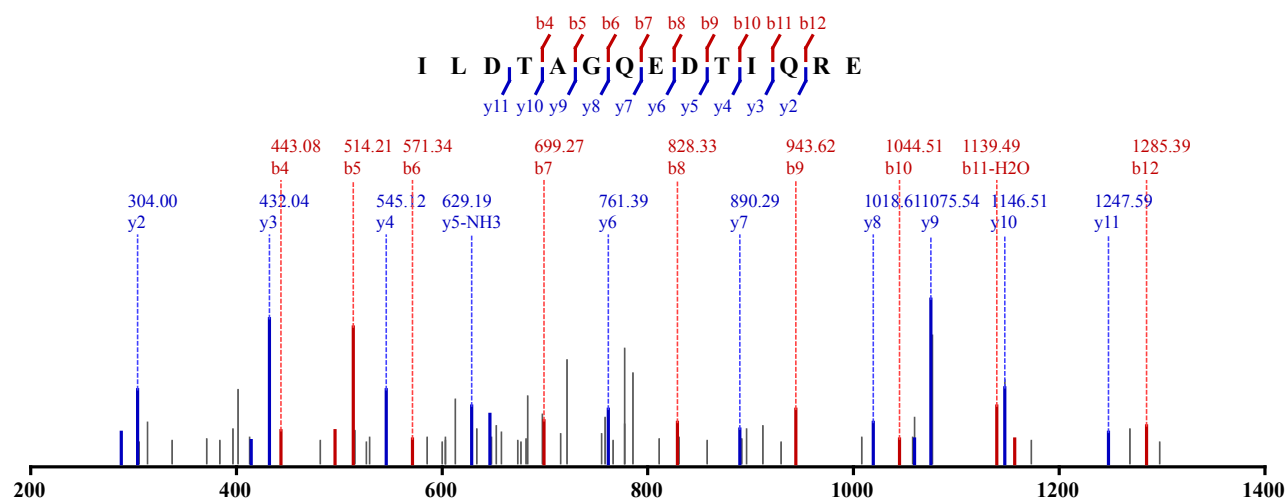

Not Modified  
 Identified in MSS482 with qvalue 0.00  
 Charge: 2, Exp. m/z: 794.895, Calc. m/z: 794.897  
 Data File: HeLa\_GluC\_pH5\_CID\_3xload, Scans: 12095 - 12095

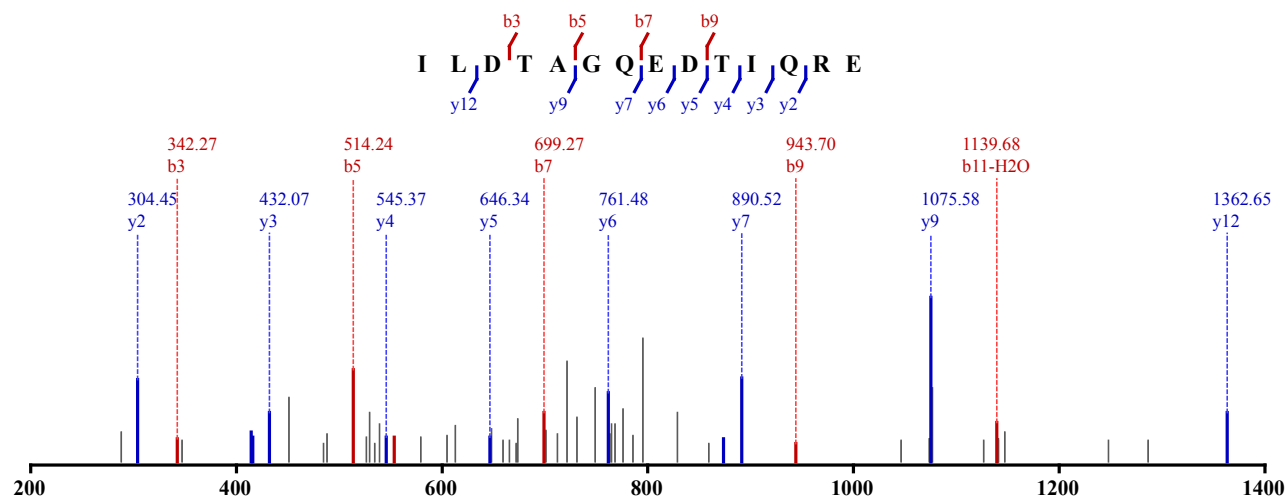

Not Modified

Identified in MSS486 with qvalue 0.00

Charge: 2, Exp. m/z: 794.894, Calc. m/z: 794.892

Data File: HeLa\_GluC\_pH4\_HCD\_1, Scans: 19474 - 19474

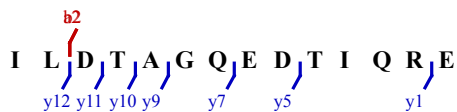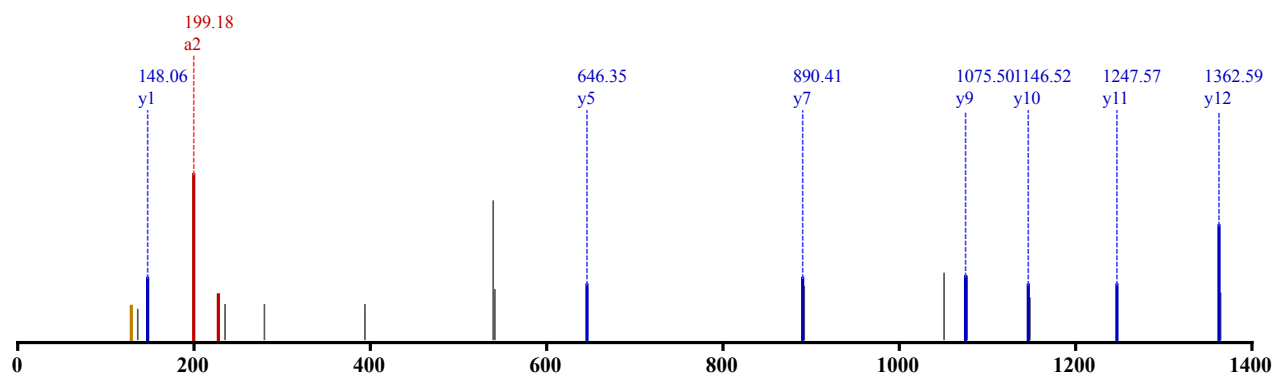

Not Modified

Identified in MSS486 with qvalue 0.00

Charge: 2, Exp. m/z: 794.893, Calc. m/z: 794.892

Data File: HeLa\_GluC\_pH4\_HCD\_3, Scans: 19170 - 19170

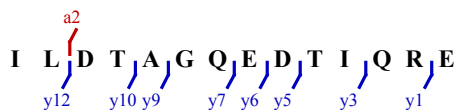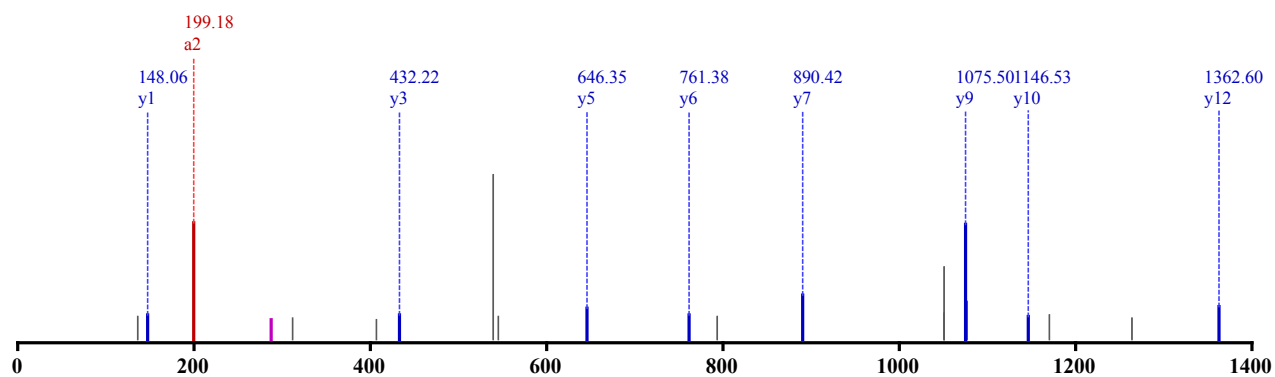

Not Modified

Identified in MSS486 with qvalue 0.00

Charge: 2, Exp. m/z: 794.894, Calc. m/z: 794.897

Data File: HeLa\_GluC\_pH4\_HCD\_2, Scans: 19392 - 19392

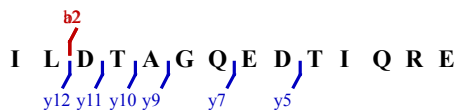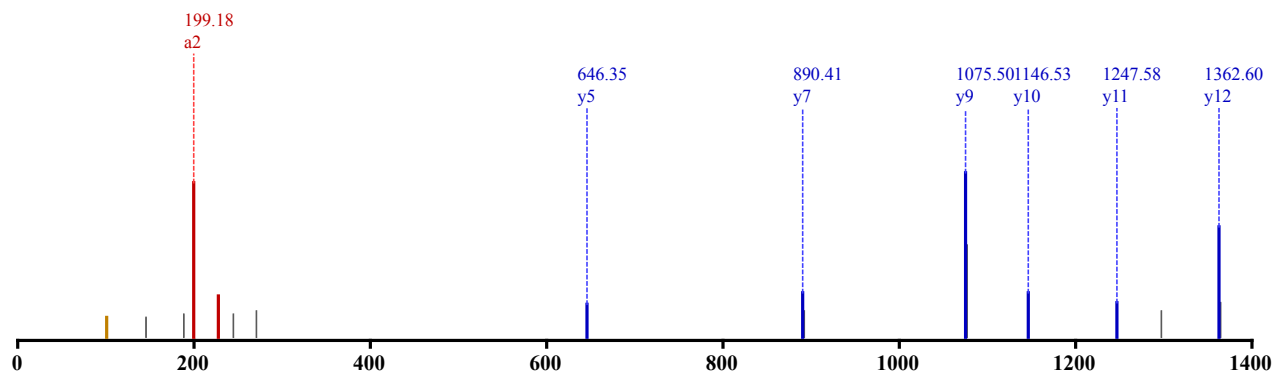

Not Modified  
 Identified in MSS486 with qvalue 0.01  
 Charge: 2, Exp. m/z: 794.896, Calc. m/z: 794.897  
 Data File: HeLa\_GluC\_pH5\_HCD\_3, Scans: 19705 - 19705

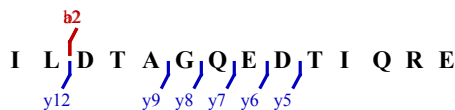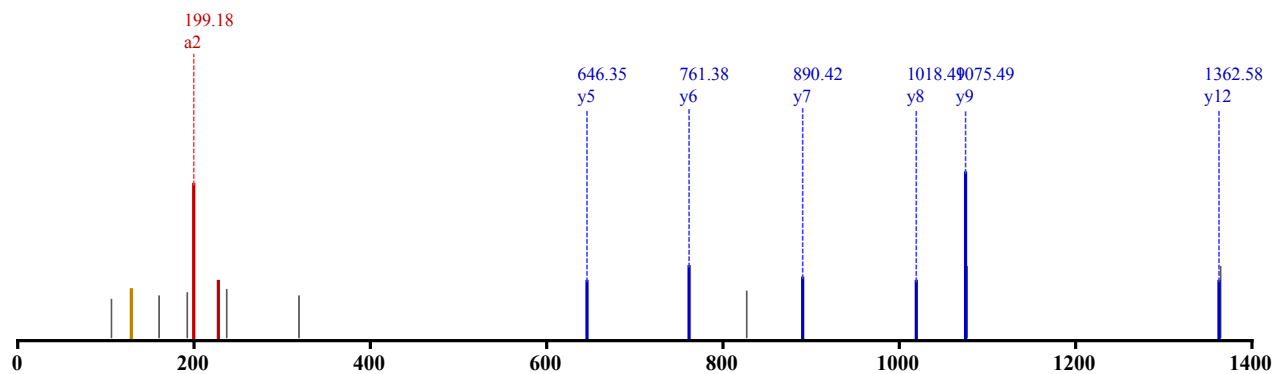

Not Modified  
 Identified in MSS482 with qvalue 0.00  
 Charge: 2, Exp. m/z: 897.950, Calc. m/z: 897.947  
 Data File: HeLa\_GluC\_pH3\_CID\_3xload\_2, Scans: 20566 - 20566

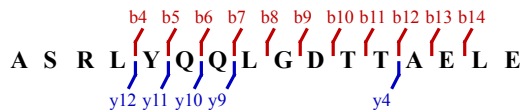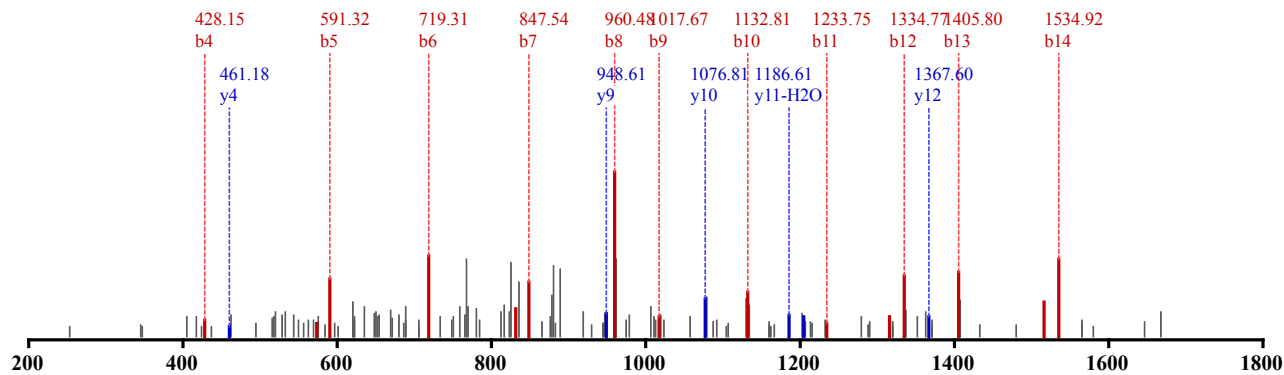

Not Modified  
 Identified in MSS30 with qvalue 0.00  
 Charge: 3, Exp. m/z: 886.778, Calc. m/z: 886.774

Data File: 20101224\_Velos1\_TaGe\_SA\_HeLa\_04, Scans: 27372 - 27372

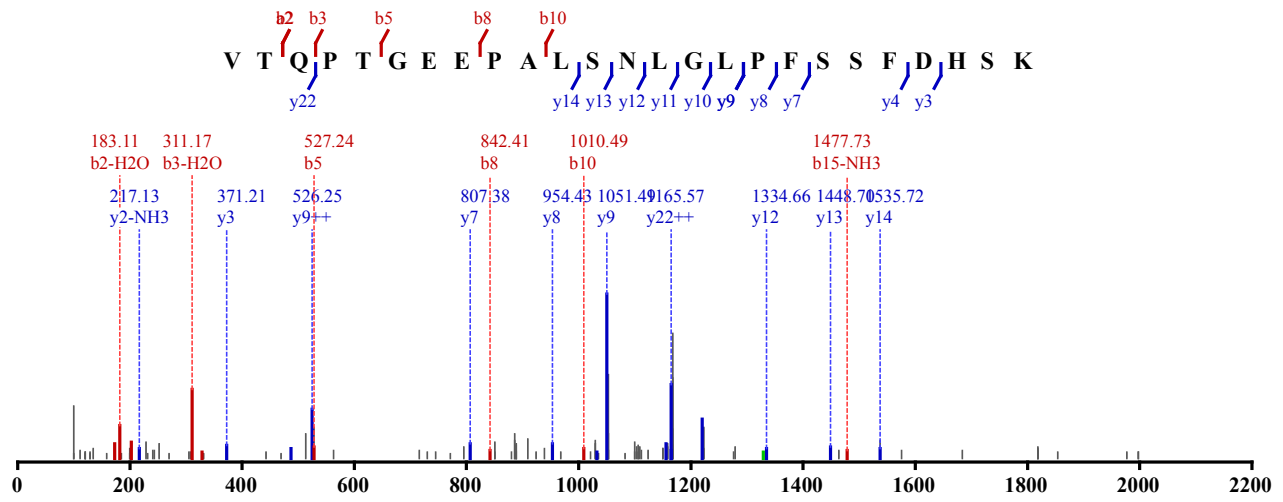

Not Modified

Identified in MSS30 with qvalue 0.00

Charge: 3, Exp. m/z: 886.773, Calc. m/z: 886.774

Data File: 20101224\_Velos1\_TaGe\_SA\_HeLa\_02, Scans: 31476 - 31476

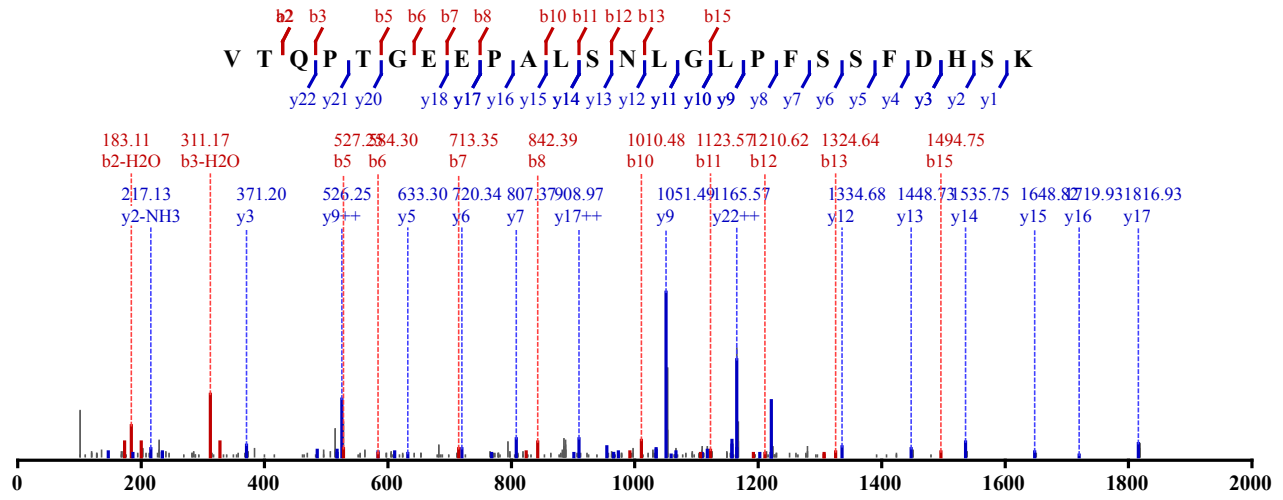

Not Modified

Identified in MSS30 with qvalue 0.00

Charge: 3, Exp. m/z: 886.774, Calc. m/z: 886.774

Data File: 20101224\_Velos1\_TaGe\_SA\_HeLa\_03, Scans: 27930 - 27930

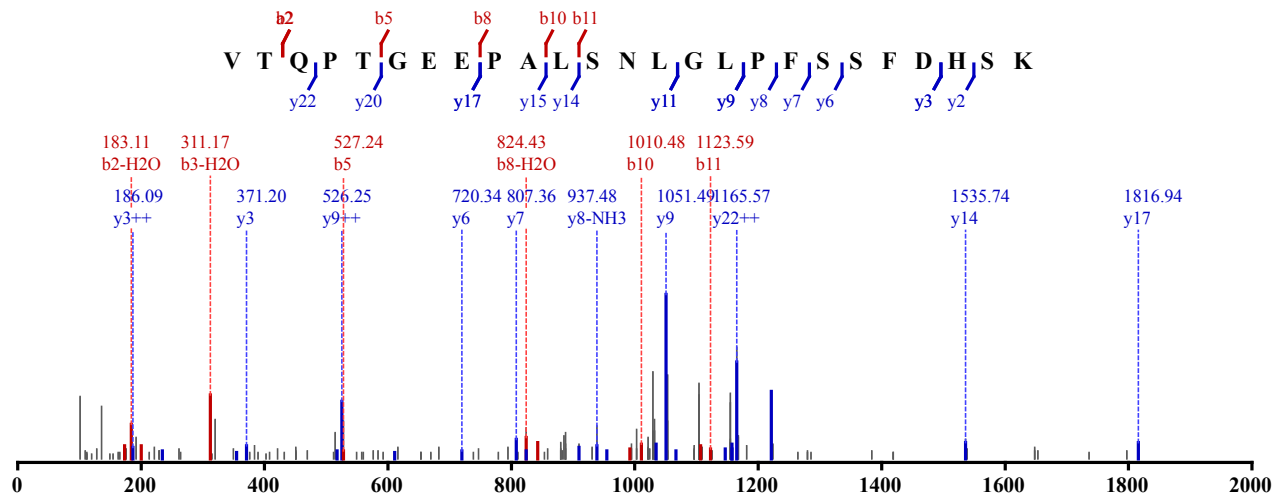

Not Modified

Identified in MSS480 with qvalue 0.00

Charge: 3, Exp. m/z: 886.775, Calc. m/z: 886.774

Data File: HeLa\_try\_pH3\_CID\_3xload\_3, Scans: 47671 - 47671

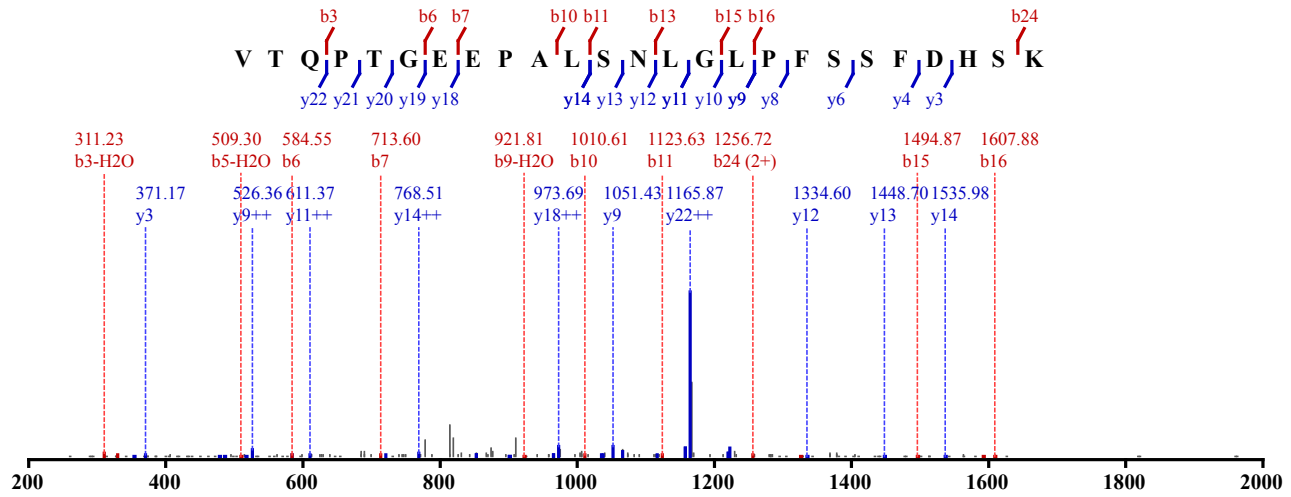

Not Modified

Identified in MSS480 with qvalue 0.00

Charge: 3, Exp. m/z: 886.774, Calc. m/z: 886.774

Data File: HeLa\_try\_pH3\_CID\_3xload\_3, Scans: 47732 - 47732

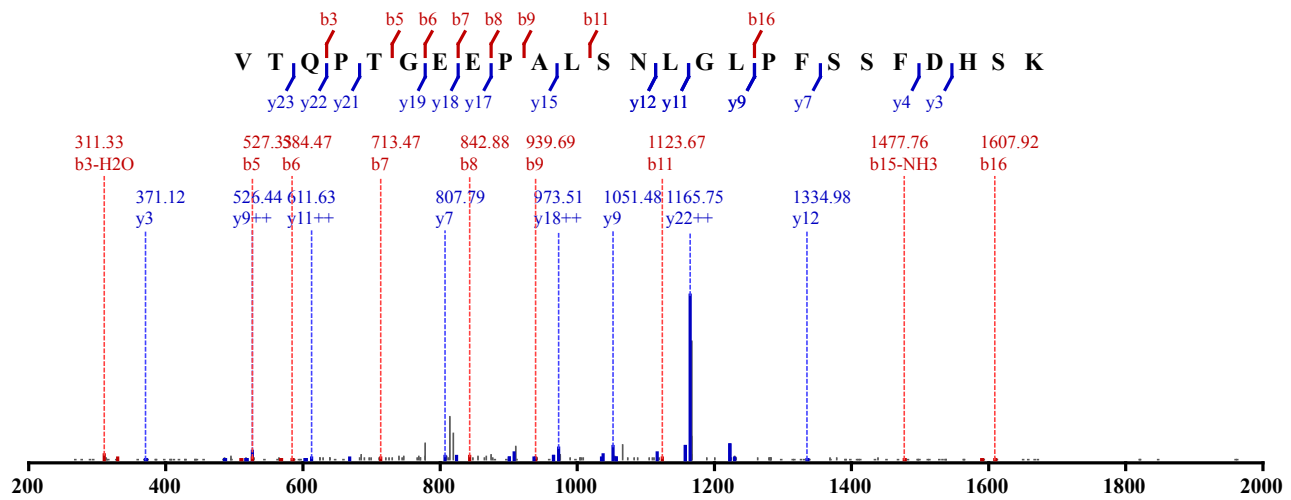

Not Modified

Identified in MSS480 with qvalue 0.00

Charge: 3, Exp. m/z: 886.770, Calc. m/z: 886.774

Data File: HeLa\_try\_pH3\_CID\_3xload\_3, Scans: 47764 - 47764

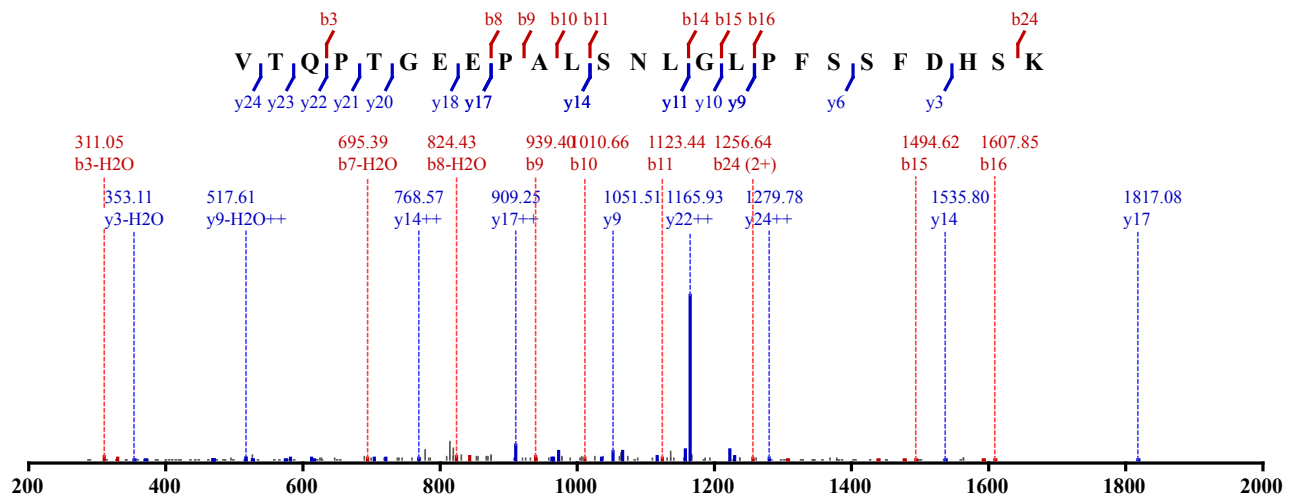

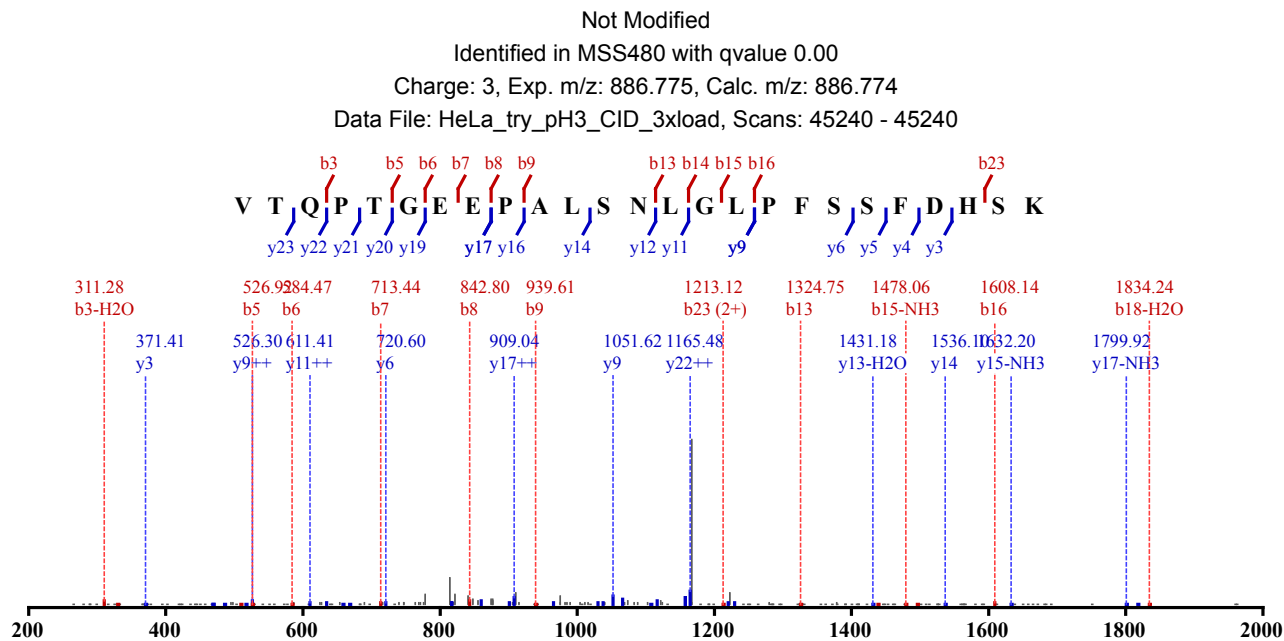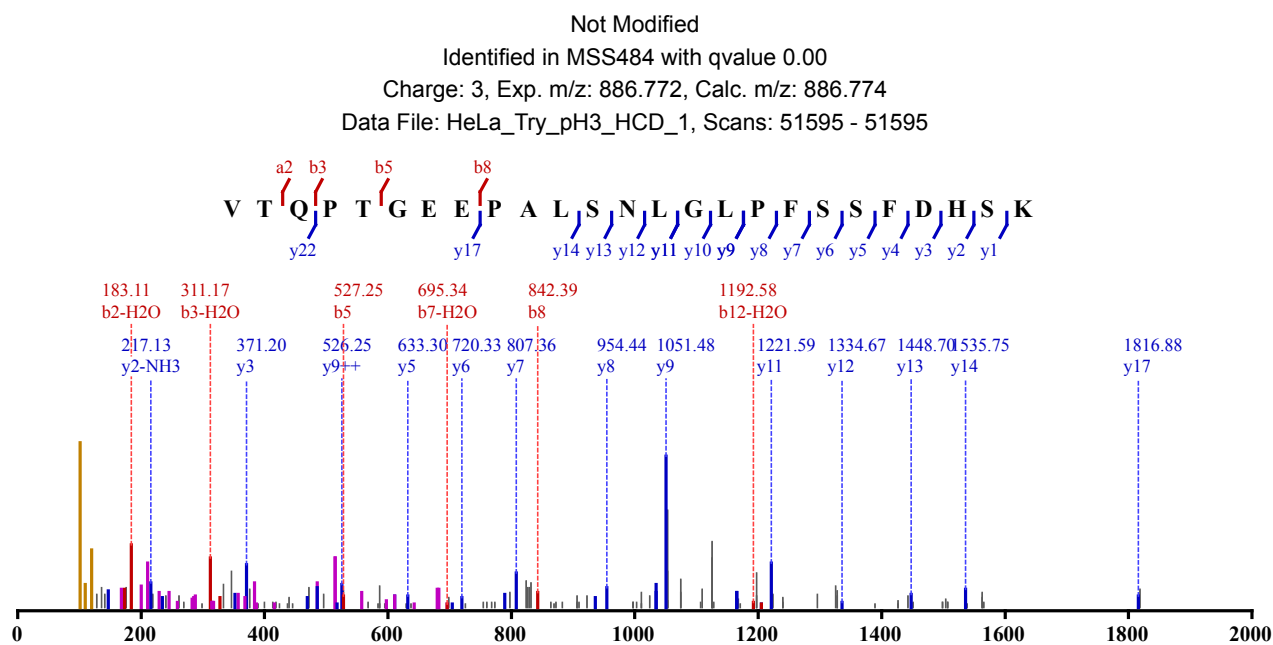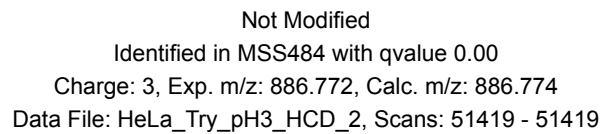

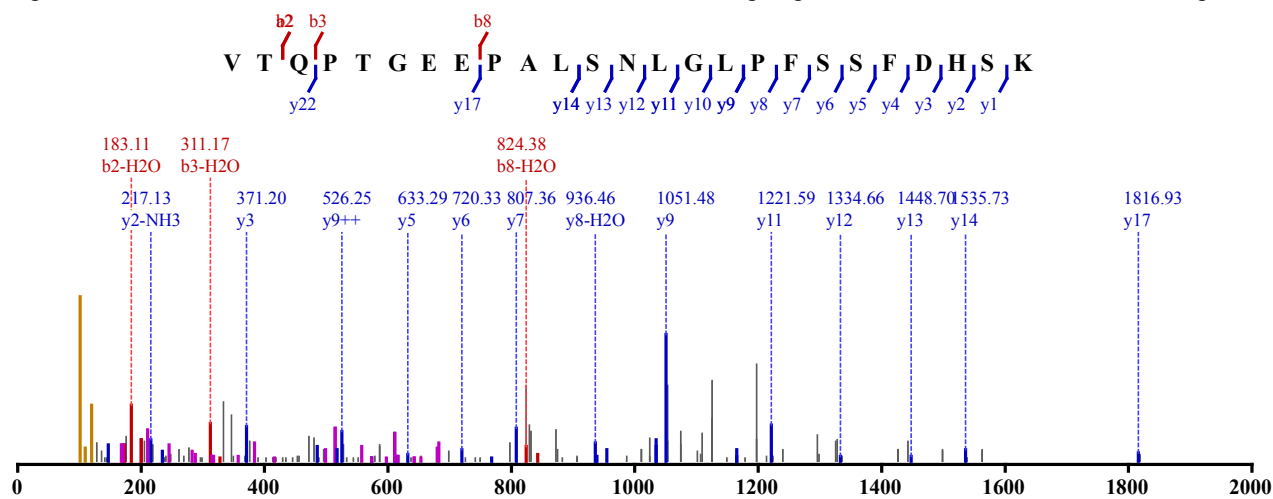

Not Modified  
 Identified in MSS484 with qvalue 0.00  
 Charge: 3, Exp. m/z: 886.771, Calc. m/z: 886.774  
 Data File: HeLa\_Try\_pH3\_HCD\_3, Scans: 49835 - 49835

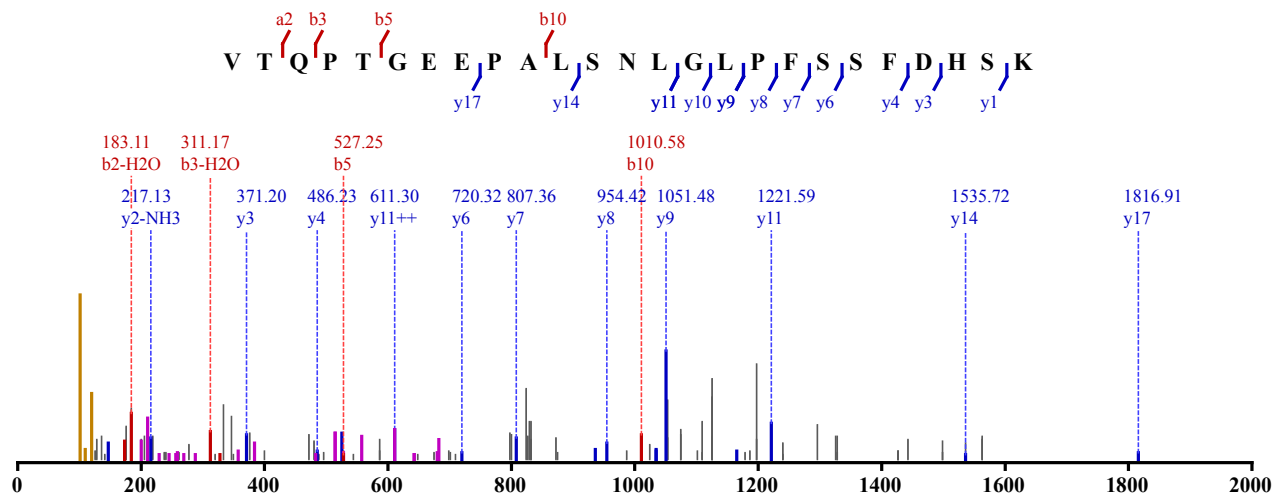

Not Modified  
 Identified in MSS485 with qvalue 0.00  
 Charge: 3, Exp. m/z: 376.565, Calc. m/z: 376.564  
 Data File: HeLa\_LysC\_80pcACN\_HCD\_2, Scans: 24258 - 24258

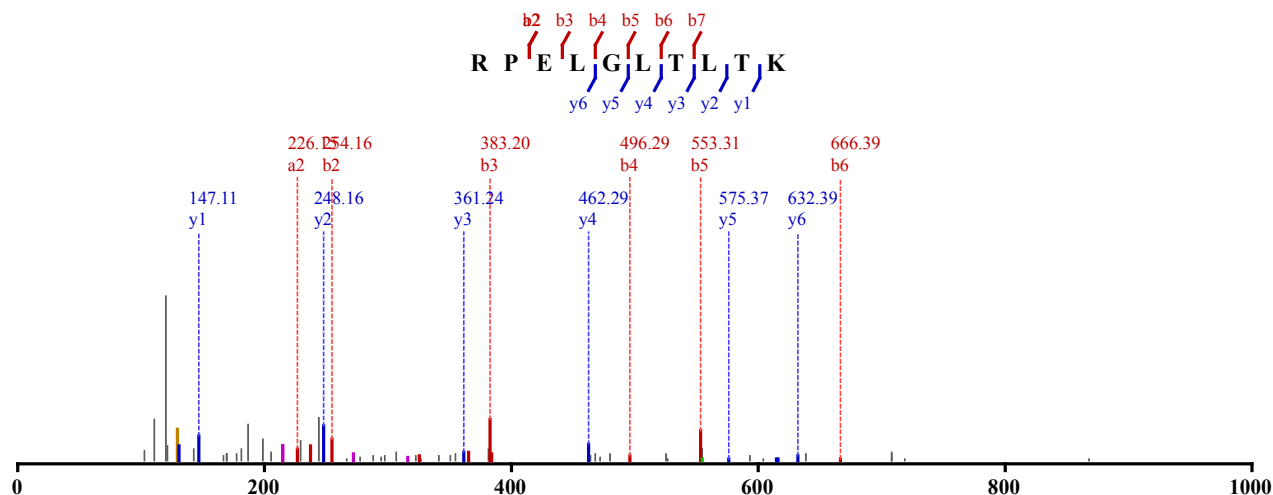

Not Modified  
 Identified in MSS481 with qvalue 0.00  
 Charge: 4, Exp. m/z: 450.945, Calc. m/z: 450.697



Data File: HeLa\_LysC\_pH6\_CID\_3load\_3, Scans: 27045 - 27045

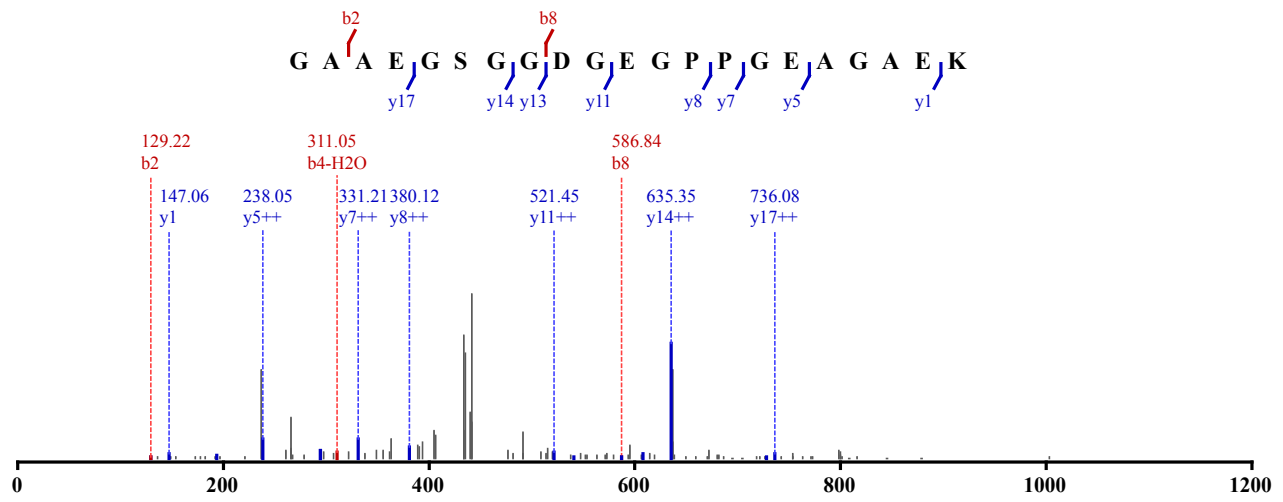

Not Modified

Identified in MSS485 with qvalue 0.00

Charge: 2, Exp. m/z: 900.388, Calc. m/z: 900.387

Data File: HeLa\_LysC\_pH8\_HCD\_2, Scans: 15428 - 15428

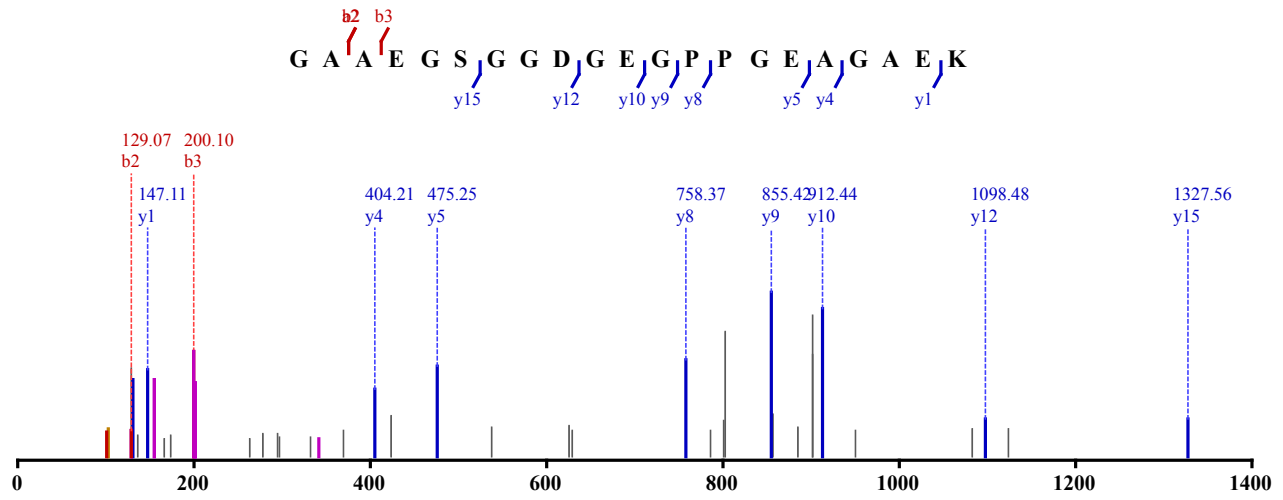

1 x Carbamidomethyl (C)

Identified in MSS485 with qvalue 0.00

Charge: 3, Exp. m/z: 737.683, Calc. m/z: 737.684

Data File: HeLa\_LysC\_pH4\_HCD\_2, Scans: 29583 - 29583

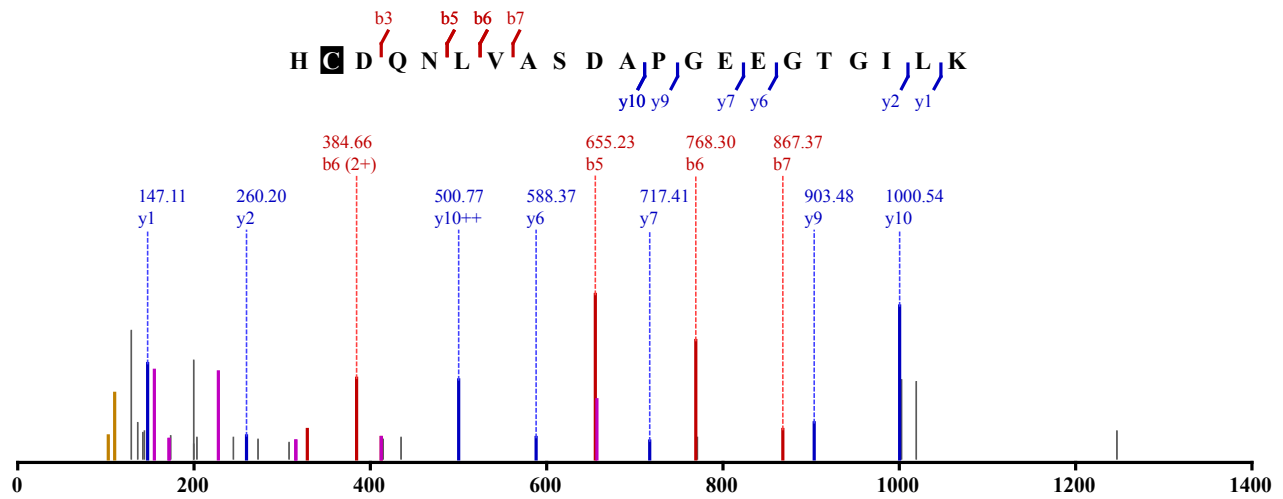

1 x Oxidation (M)

Identified in MSS480 with qvalue 0.00  
 Charge: 3, Exp. m/z: 666.973, Calc. m/z: 666.974  
 Data File: HeLa\_try\_pH3\_CID\_3xload, Scans: 11593 - 11593

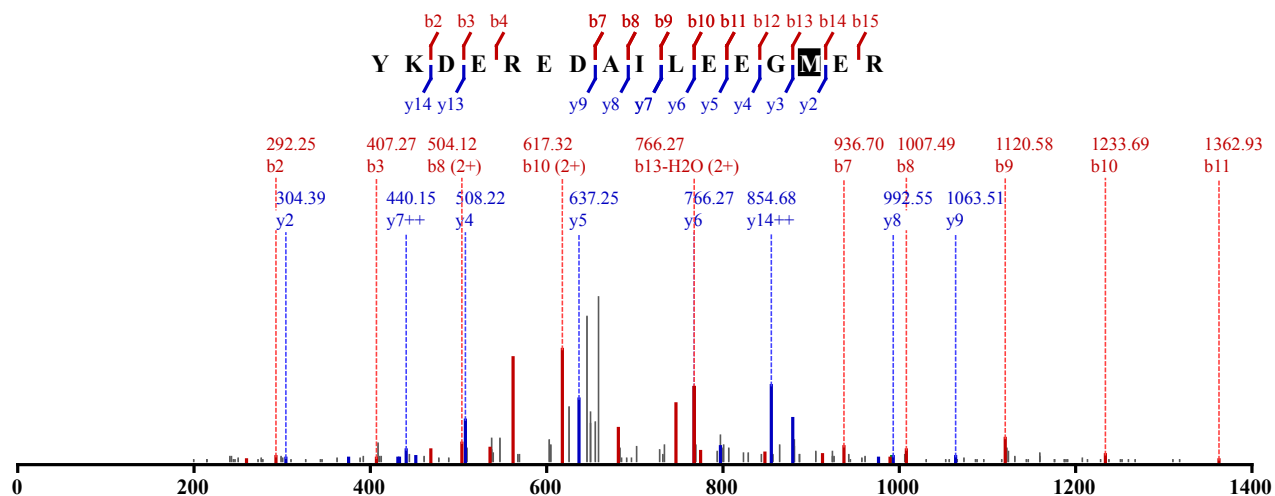

Not Modified  
 Identified in MSS484 with qvalue 0.00  
 Charge: 2, Exp. m/z: 543.321, Calc. m/z: 543.322  
 Data File: HeLa\_Try\_pH11\_HCD\_1, Scans: 42446 - 42446

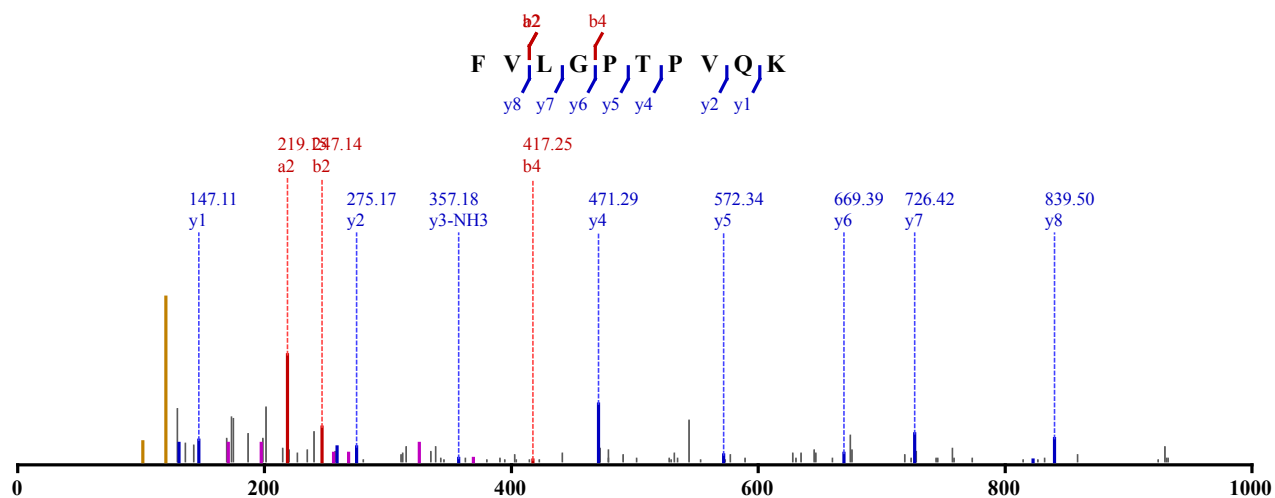

Not Modified  
 Identified in MSS485 with qvalue 0.00  
 Charge: 2, Exp. m/z: 543.322, Calc. m/z: 543.322  
 Data File: HeLa\_LysC\_pH11\_HCD\_2, Scans: 39741 - 39741

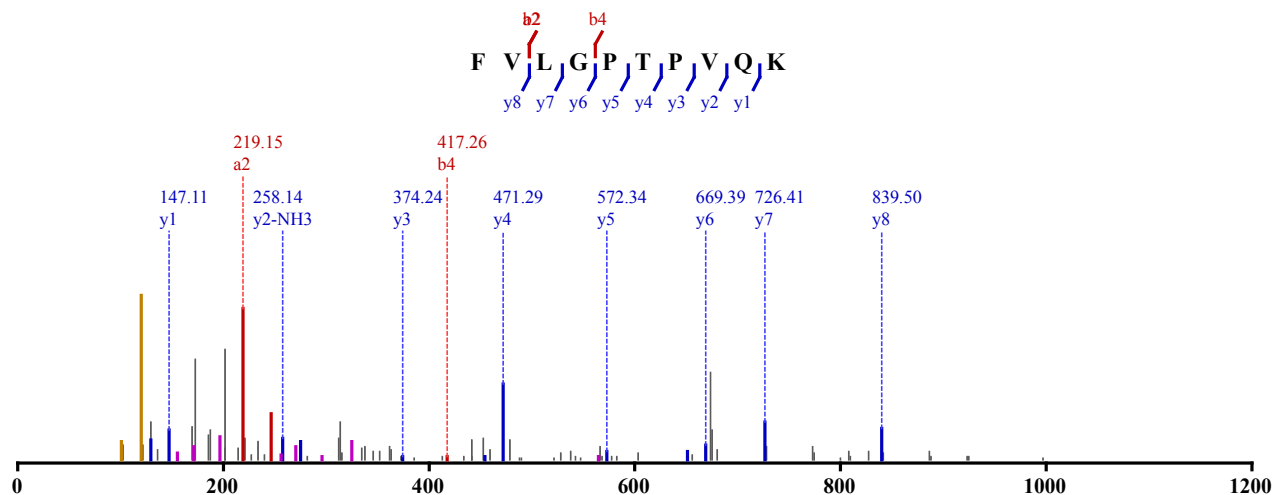

Not Modified

Identified in MSS485 with qvalue 0.00

Charge: 2, Exp. m/z: 543.321, Calc. m/z: 543.322

Data File: HeLa\_LysC\_pH11\_HCD\_3, Scans: 38753 - 38753

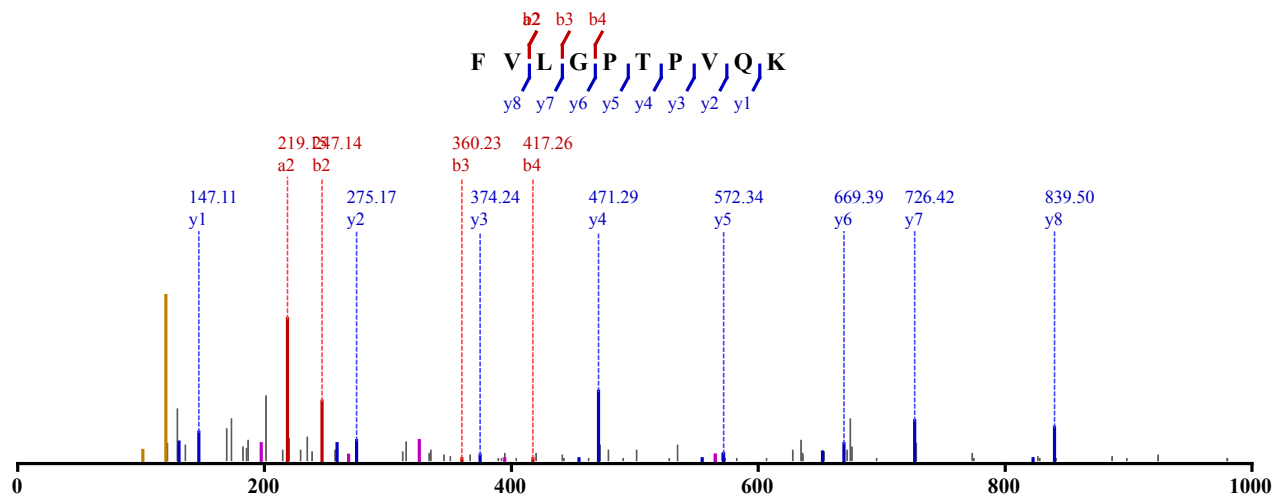

Not Modified

Identified in MSS479 with qvalue 0.00

Charge: 2, Exp. m/z: 623.337, Calc. m/z: 623.337

Data File: HeLa\_AspN\_pH11\_HCD\_1, Scans: 32835 - 32835

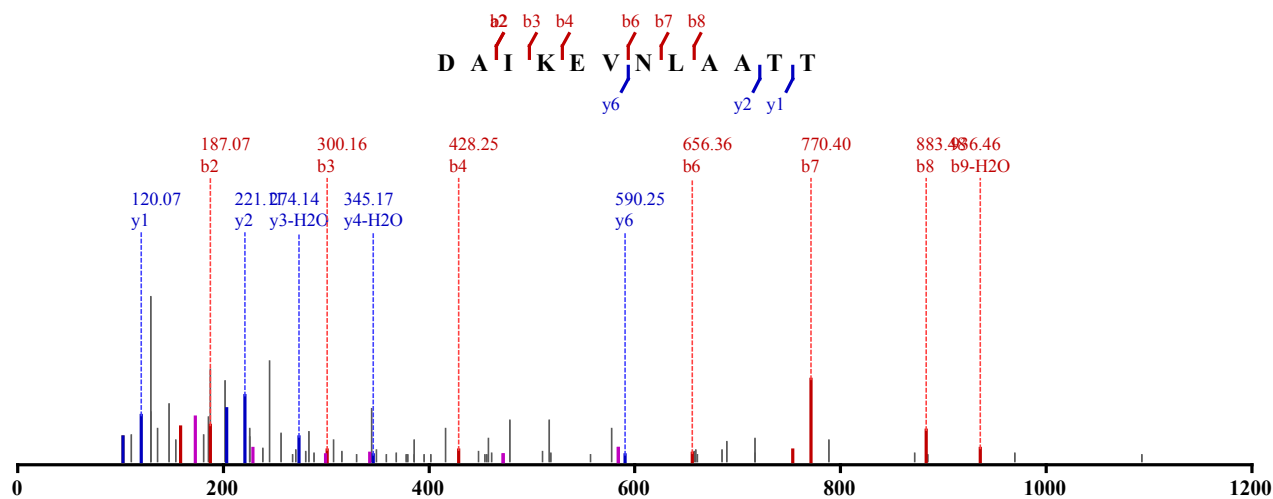

Not Modified

Identified in MSS479 with qvalue 0.00

Charge: 2, Exp. m/z: 623.338, Calc. m/z: 623.337

Data File: HeLa\_AspN\_pH11\_HCD\_2, Scans: 31617 - 31617

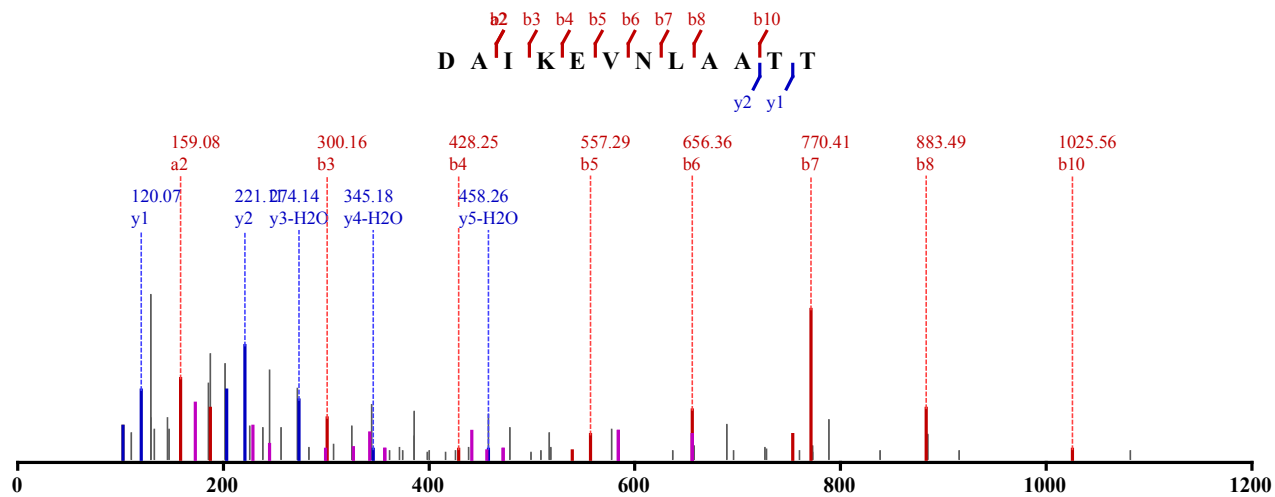

Not Modified  
 Identified in MSS479 with qvalue 0.00  
 Charge: 2, Exp. m/z: 623.338, Calc. m/z: 623.337  
 Data File: HeLa\_AspN\_pH11\_HCD\_3, Scans: 30967 - 30967

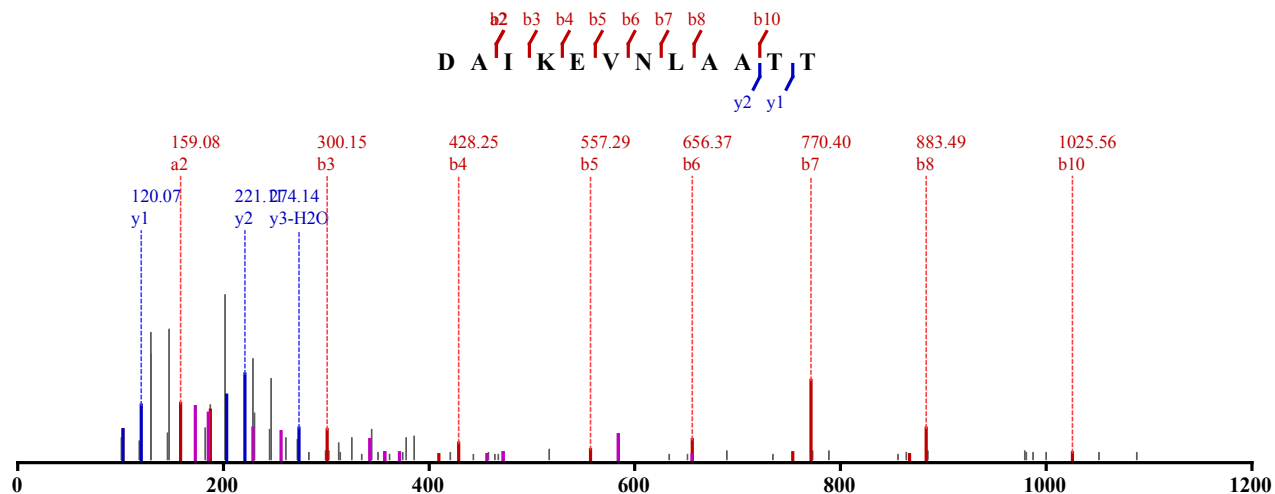

Not Modified  
 Identified in MSS113 with qvalue 0.00  
 Charge: 2, Exp. m/z: 720.416, Calc. m/z: 720.417  
 Data File: HeLa\_try\_CID\_1, Scans: 48536 - 48536

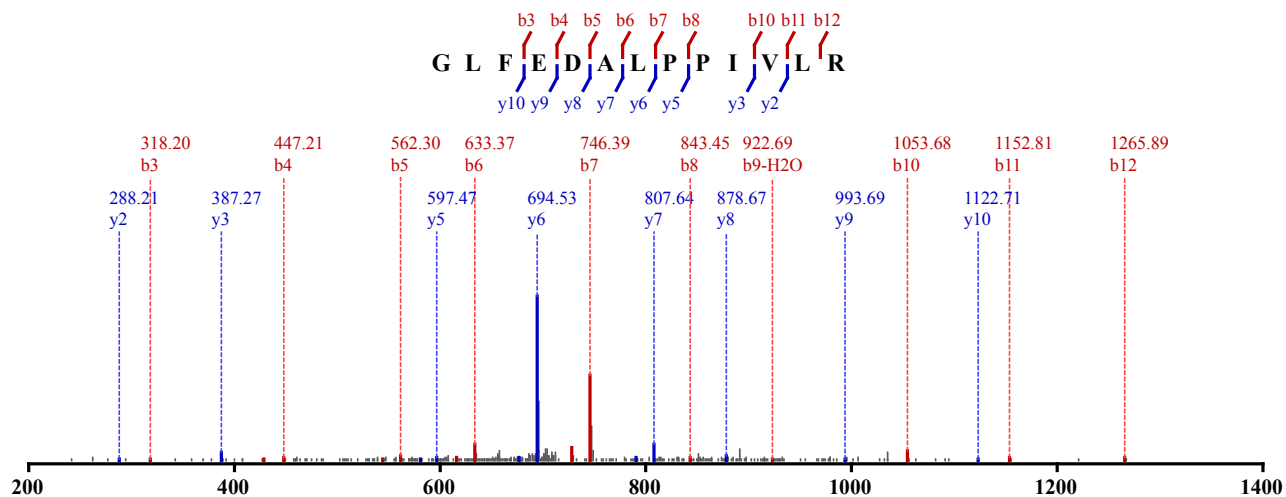

Not Modified  
 Identified in MSS122 with qvalue 0.00  
 Charge: 2, Exp. m/z: 720.418, Calc. m/z: 720.417

Data File: HeLa\_try\_HCD\_1, Scans: 50228 - 50228

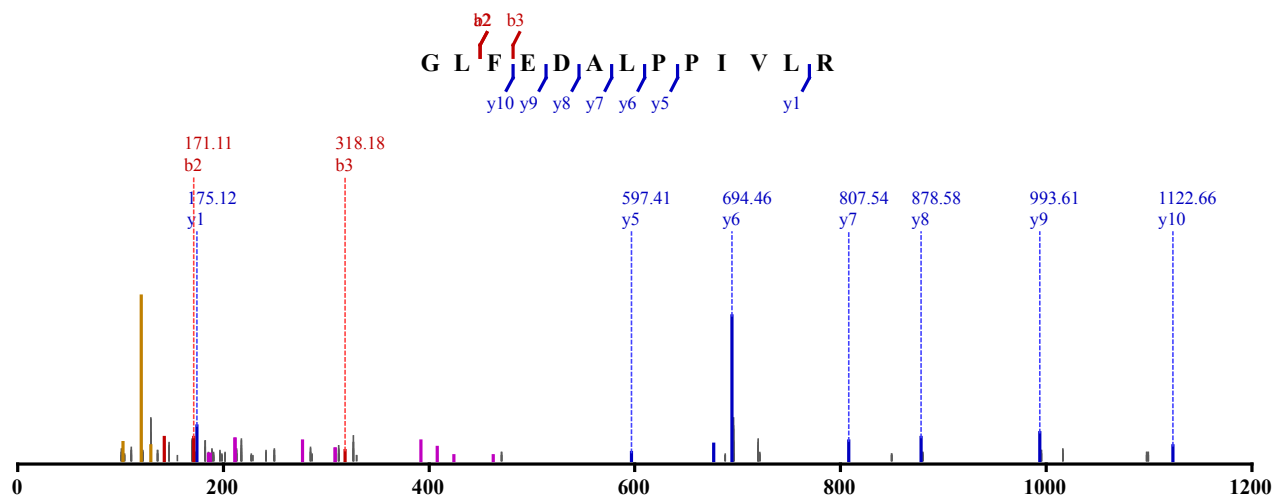

Not Modified  
 Identified in MSS134 with qvalue 0.00  
 Charge: 2, Exp. m/z: 720.417, Calc. m/z: 720.417  
 Data File: HeLa\_GluC-try\_HCD\_1, Scans: 39155 - 39155

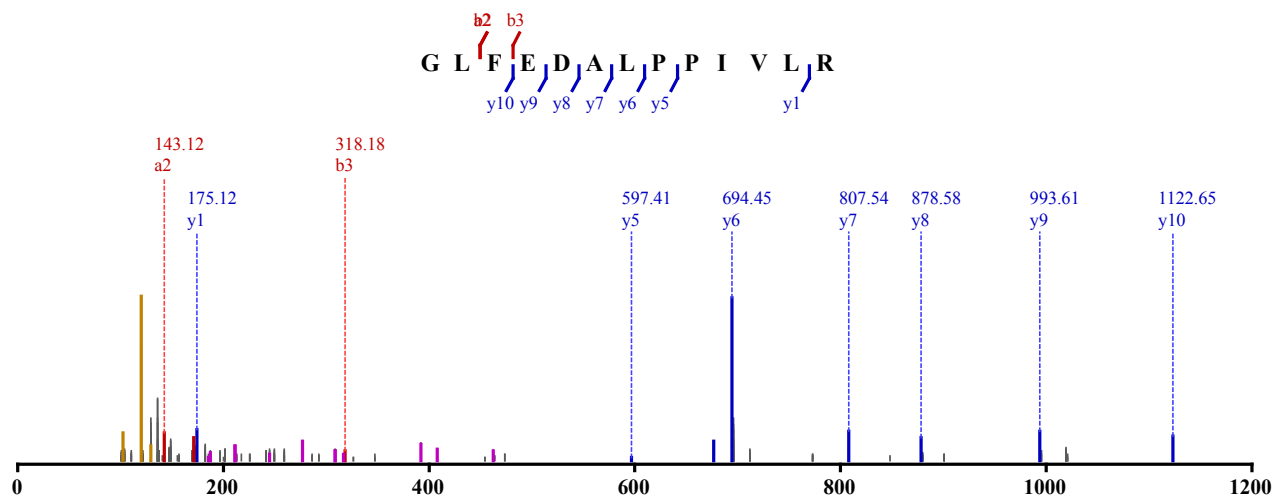

Not Modified  
 Identified in MSS480 with qvalue 0.00  
 Charge: 2, Exp. m/z: 720.416, Calc. m/z: 720.417  
 Data File: HeLa\_try\_pH3\_CID\_3xload, Scans: 52451 - 52451

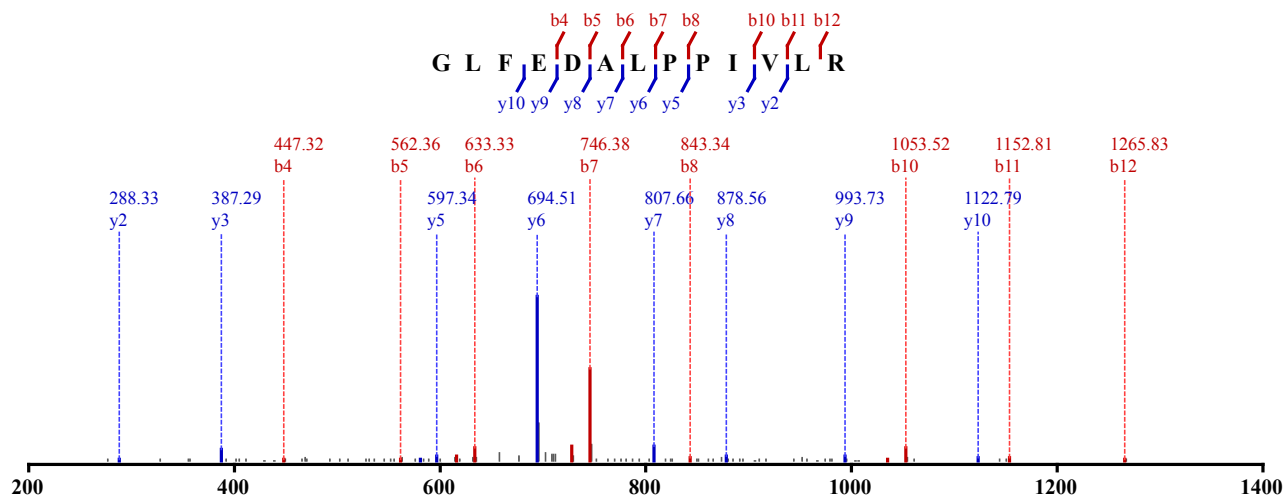

Not Modified

Identified in MSS482 with qvalue 0.01  
 Charge: 2, Exp. m/z: 609.822, Calc. m/z: 609.822  
 Data File: HeLa\_GluC\_pH3\_CID\_3xload\_3, Scans: 29640 - 29640

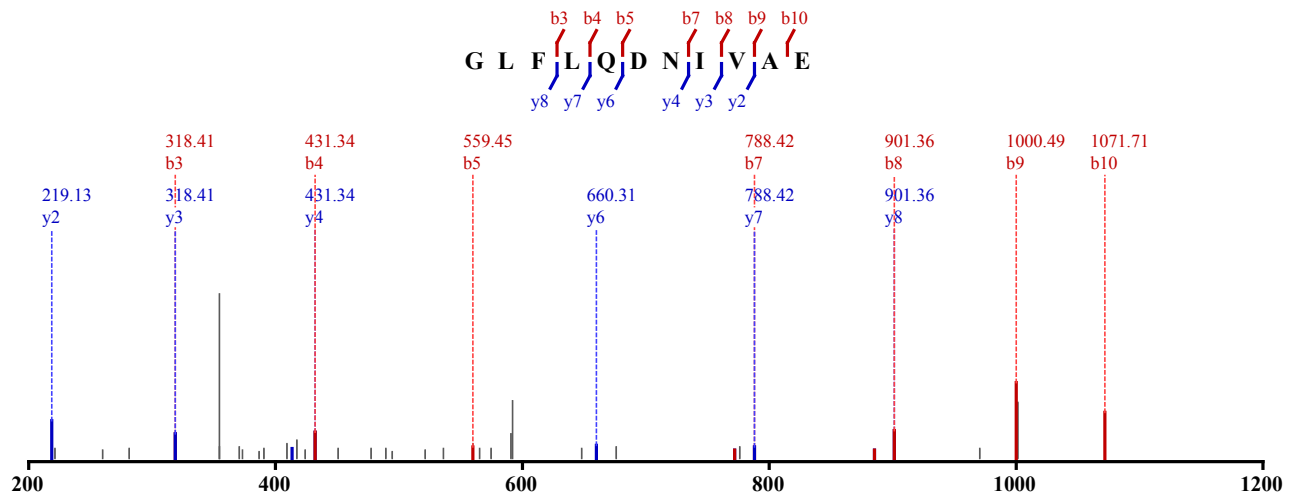

Not Modified  
 Identified in MSS482 with qvalue 0.00  
 Charge: 2, Exp. m/z: 609.822, Calc. m/z: 609.822  
 Data File: HeLa\_GluC\_pH3\_CID\_3xload\_3, Scans: 29696 - 29696

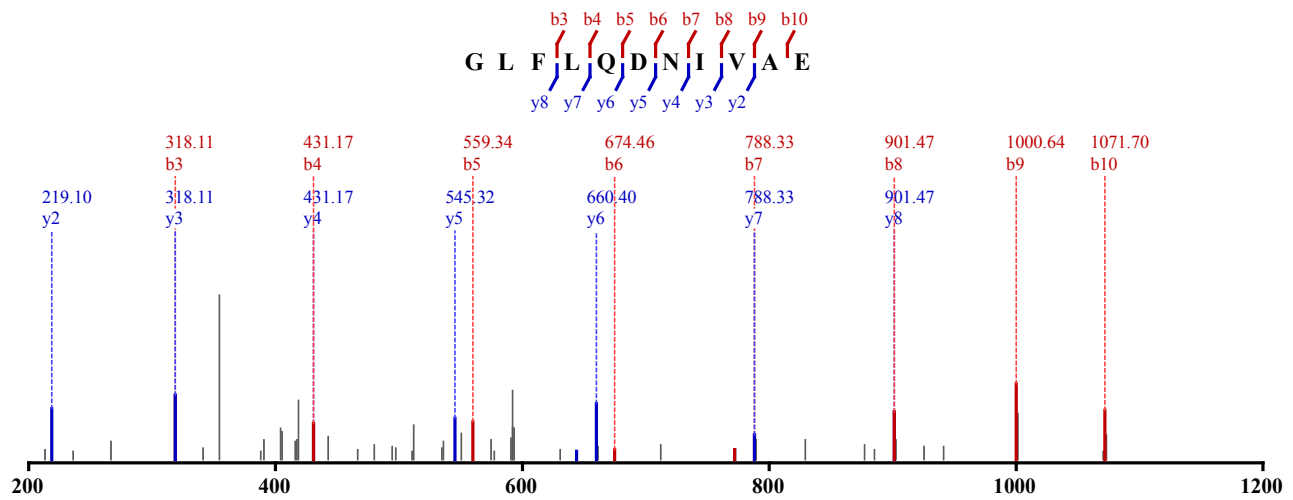

Not Modified  
 Identified in MSS482 with qvalue 0.00  
 Charge: 2, Exp. m/z: 609.822, Calc. m/z: 609.822  
 Data File: HeLa\_GluC\_pH3\_CID\_3xload\_2, Scans: 31125 - 31125

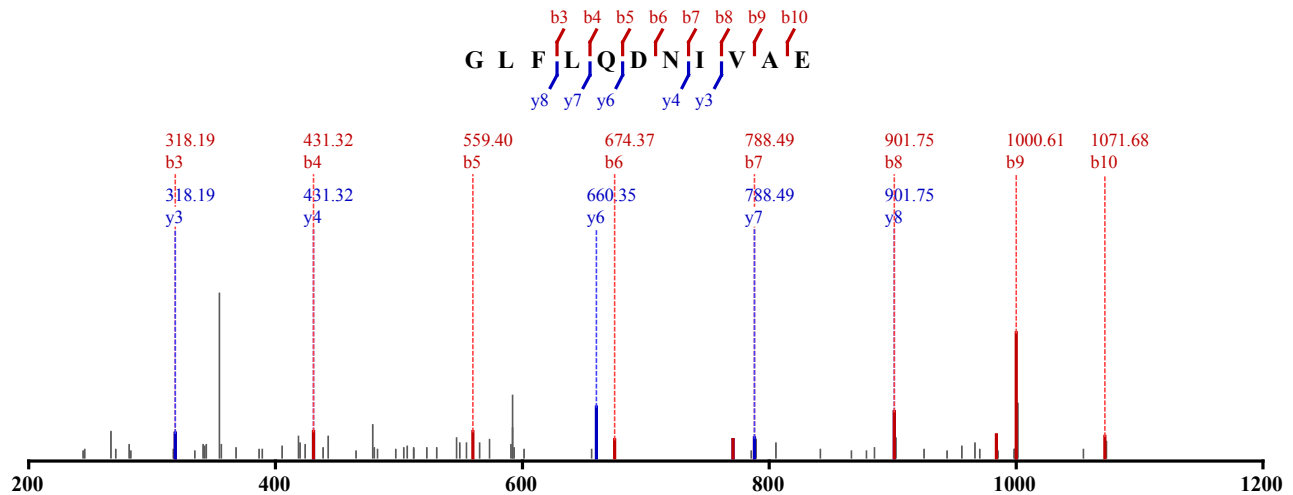

Not Modified

Identified in MSS482 with qvalue 0.00

Charge: 2, Exp. m/z: 609.822, Calc. m/z: 609.822

Data File: HeLa\_GluC\_pH3\_CID\_3xload\_2, Scans: 31179 - 31179

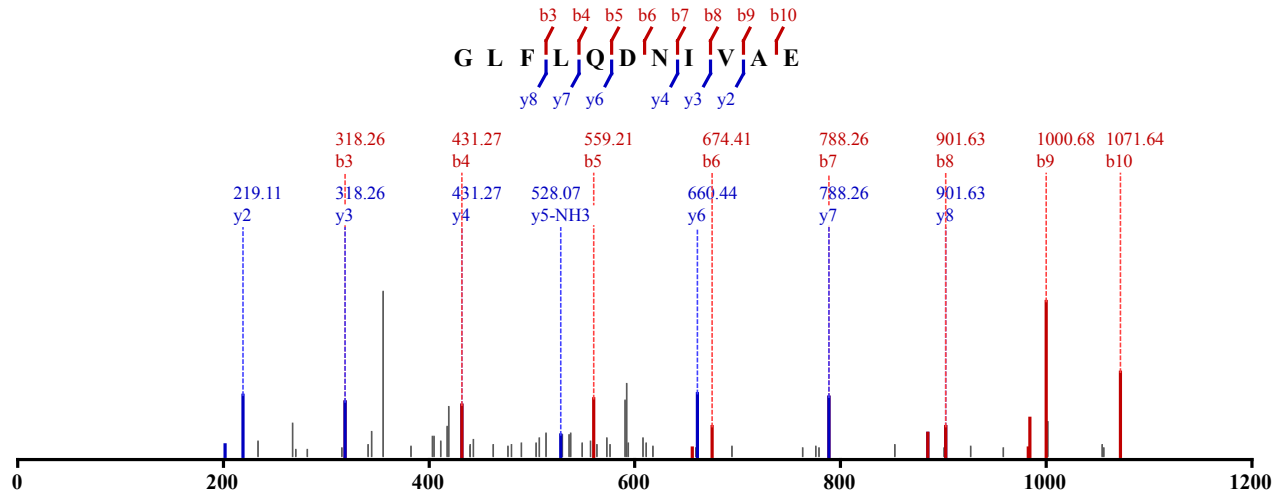

Not Modified

Identified in MSS482 with qvalue 0.00

Charge: 2, Exp. m/z: 609.822, Calc. m/z: 609.822

Data File: HeLa\_GluC\_pH3\_CID\_3xload, Scans: 29922 - 29922

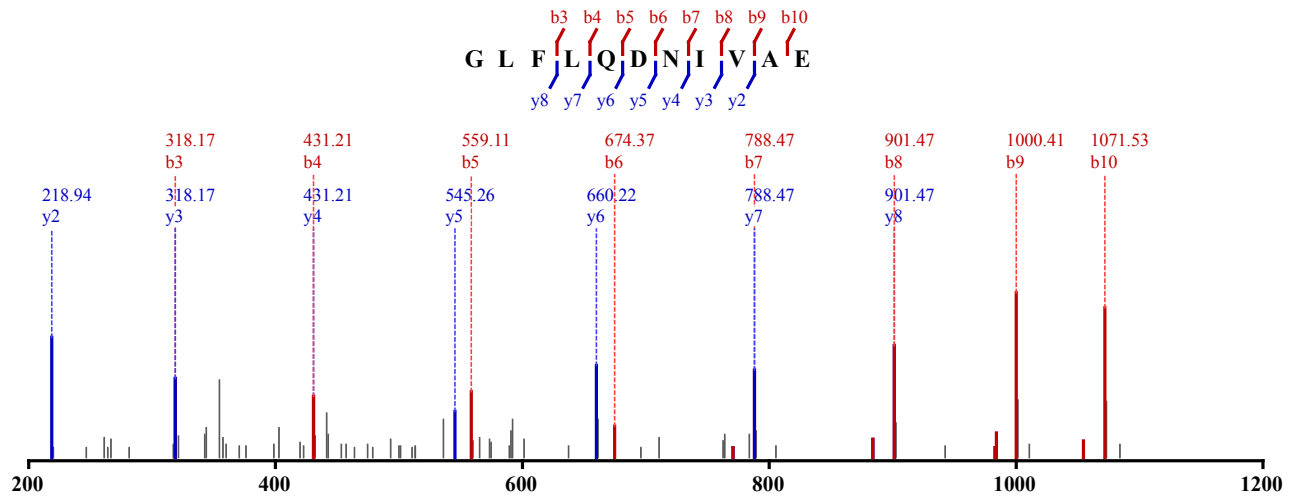

Not Modified

Identified in MSS485 with qvalue 0.01

Charge: 3, Exp. m/z: 530.599, Calc. m/z: 530.597

Data File: HeLa\_LysC\_pH5\_HCD\_1, Scans: 29926 - 29926

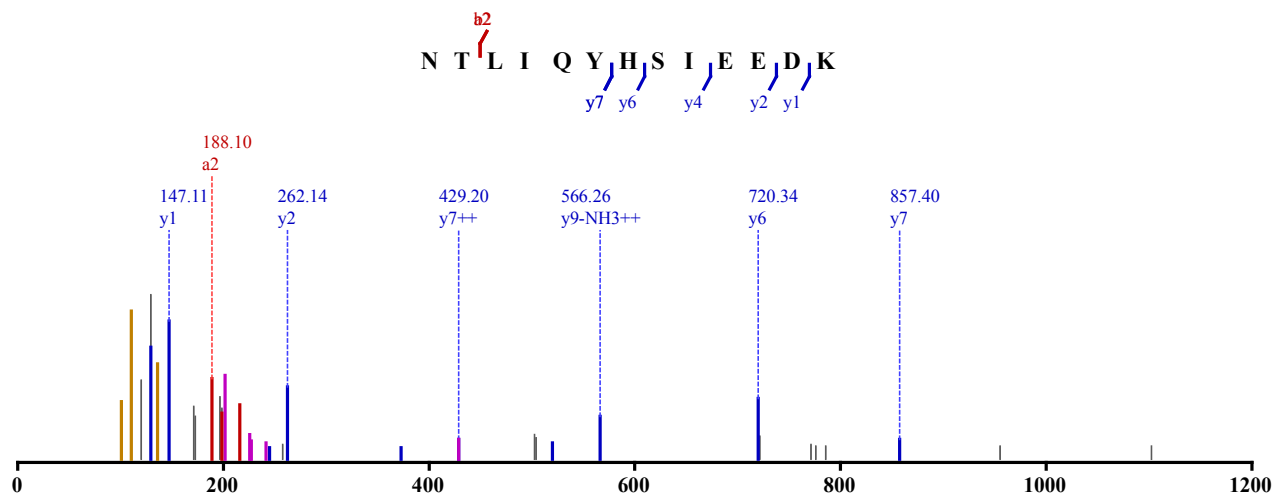

Not Modified

Identified in MSS485 with qvalue 0.00

Charge: 2, Exp. m/z: 795.394, Calc. m/z: 795.392

Data File: HeLa\_LysC\_pH5\_HCD\_2, Scans: 24723 - 24723

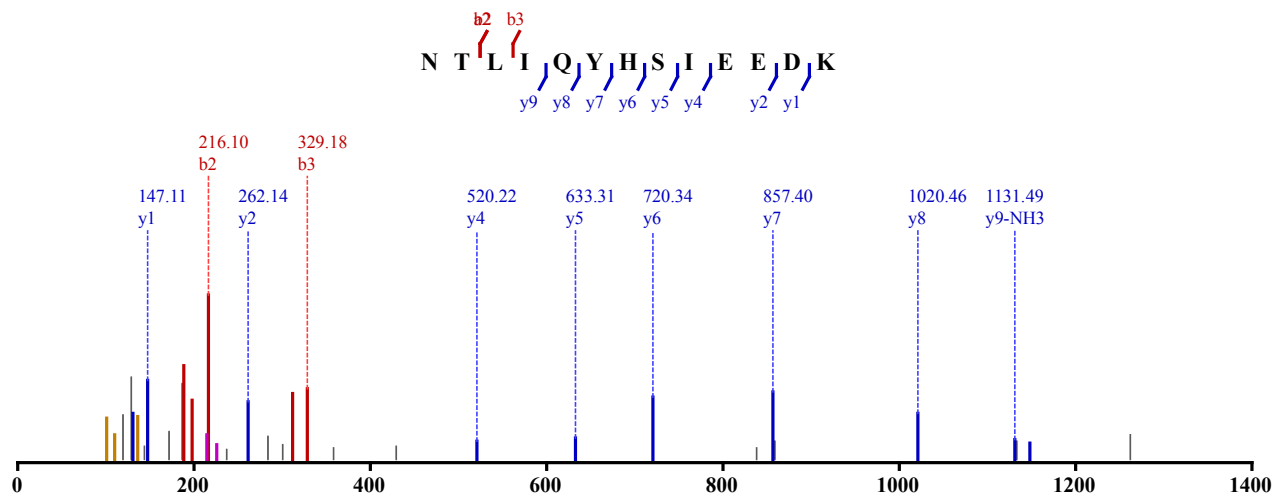

Not Modified

Identified in MSS485 with qvalue 0.00

Charge: 2, Exp. m/z: 795.394, Calc. m/z: 795.392

Data File: HeLa\_LysC\_pH5\_HCD\_3, Scans: 27003 - 27003

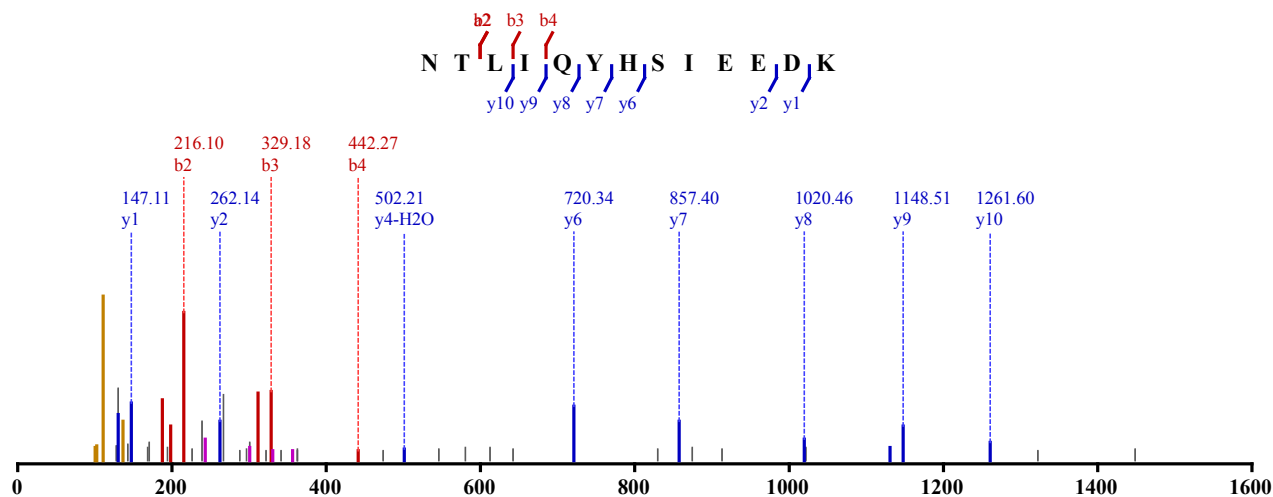

Not Modified

Identified in MSS485 with qvalue 0.00

Charge: 3, Exp. m/z: 530.599, Calc. m/z: 530.597



Data File: HeLa\_LysC\_pH5\_HCD\_2, Scans: 24703 - 24703

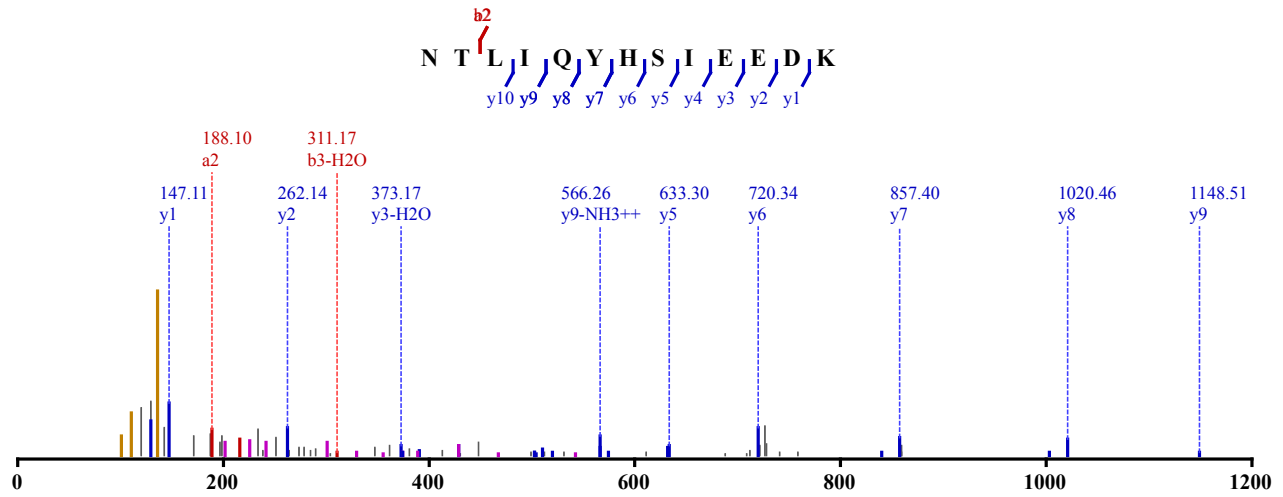

Not Modified

Identified in MSS481 with qvalue 0.00

Charge: 2, Exp. m/z: 898.949, Calc. m/z: 898.947

Data File: HeLa\_LysC\_pH4\_CID\_3xload\_2, Scans: 21264 - 21264

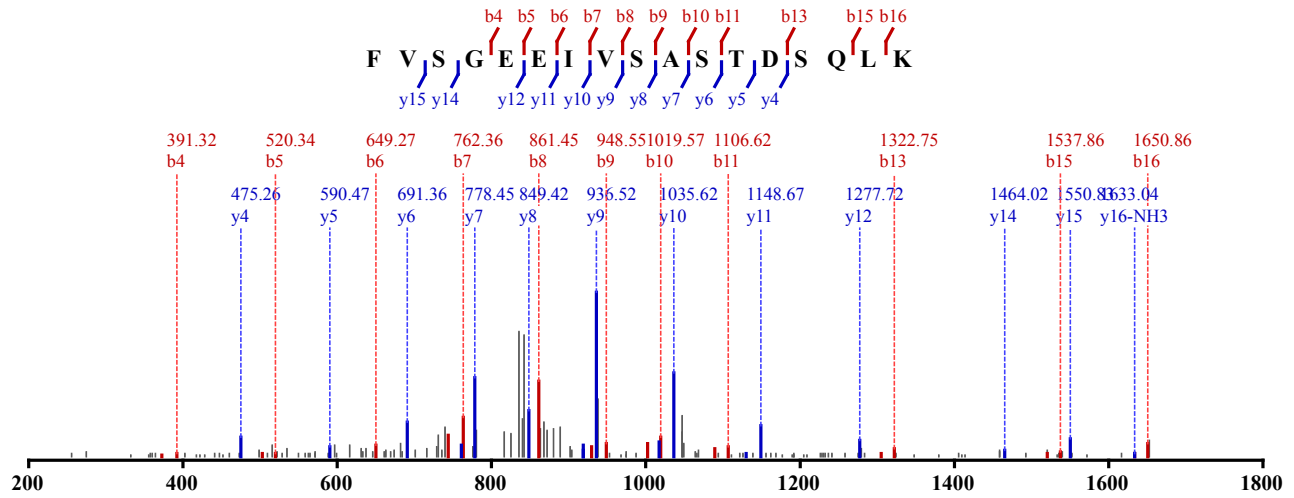

Not Modified

Identified in MSS481 with qvalue 0.00

Charge: 2, Exp. m/z: 899.452, Calc. m/z: 898.947

Data File: HeLa\_LysC\_pH4\_CID\_3xload\_2, Scans: 21305 - 21305

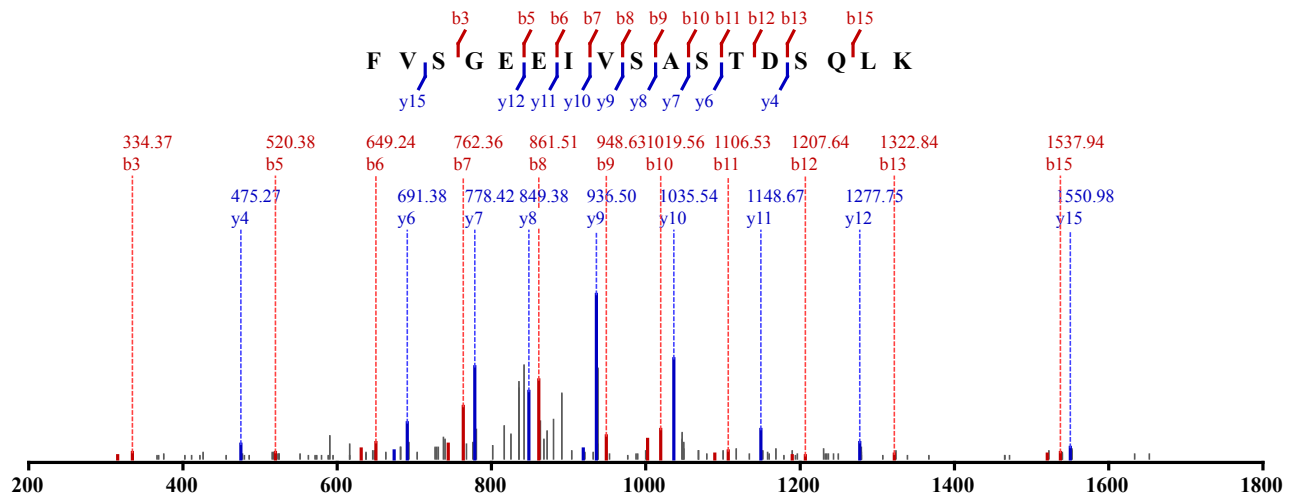

Not Modified

Identified in MSS481 with qvalue 0.00  
 Charge: 2, Exp. m/z: 898.952, Calc. m/z: 898.947  
 Data File: HeLa\_LysC\_pH4\_CID\_3xload\_3, Scans: 23371 - 23371

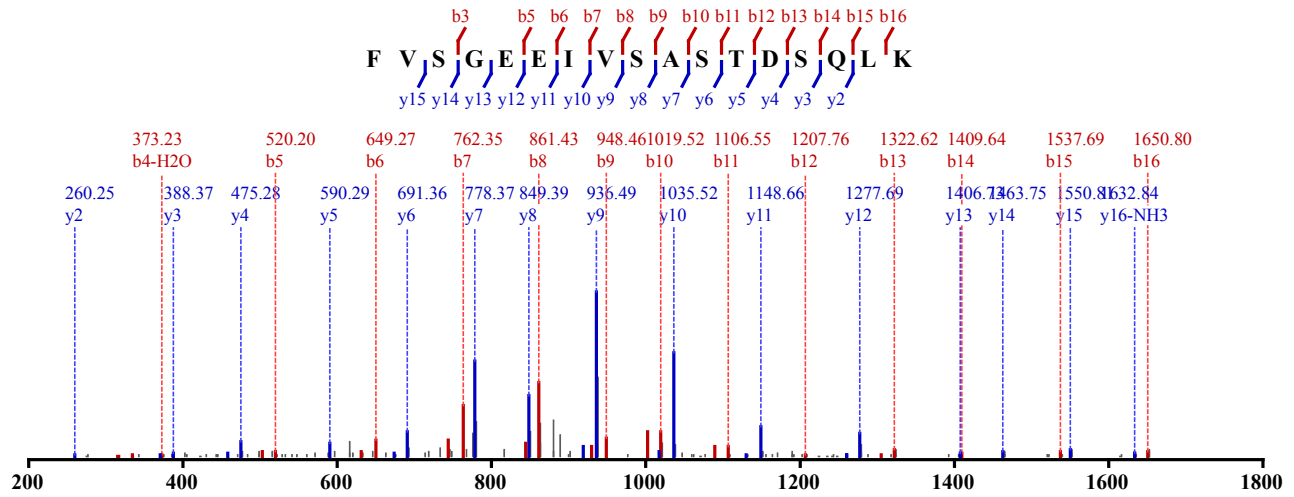

Not Modified  
 Identified in MSS485 with qvalue 0.00  
 Charge: 3, Exp. m/z: 599.636, Calc. m/z: 599.634  
 Data File: HeLa\_LysC\_pH4\_HCD\_2, Scans: 35042 - 35042

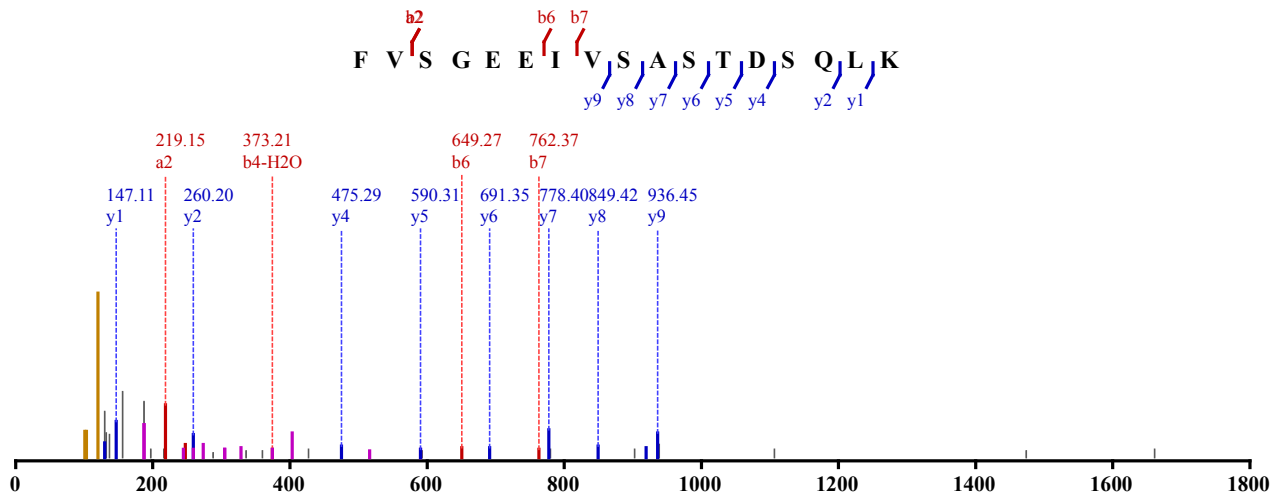

Not Modified  
 Identified in MSS481 with qvalue 0.00  
 Charge: 2, Exp. m/z: 784.919, Calc. m/z: 784.917  
 Data File: HeLa\_LysC\_pH11\_CID\_3xload\_2, Scans: 30845 - 30845

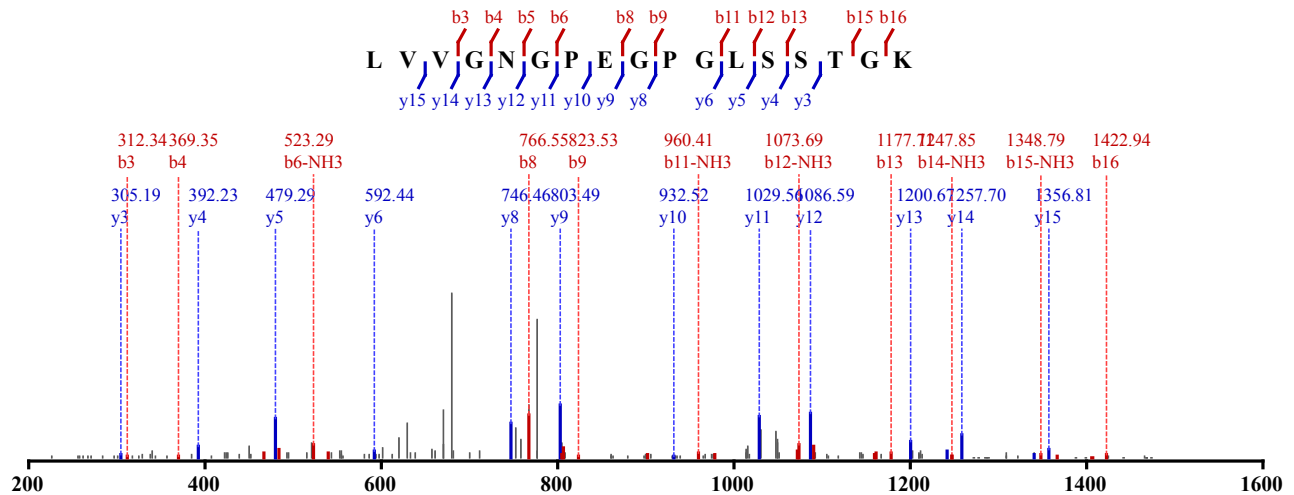

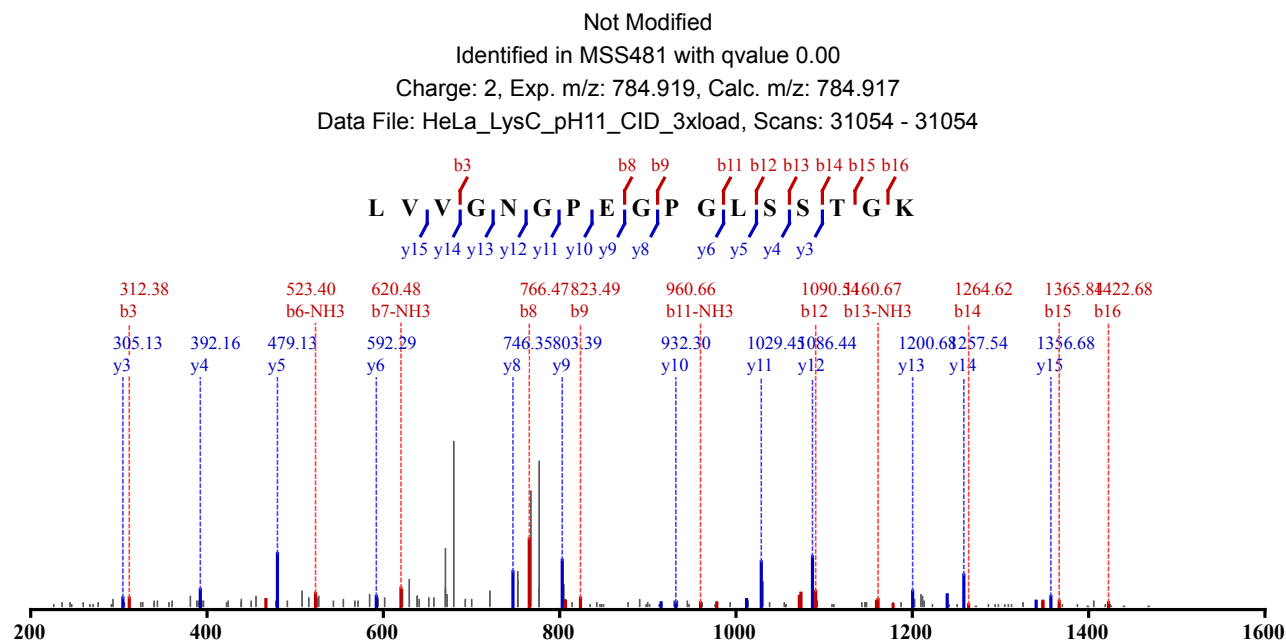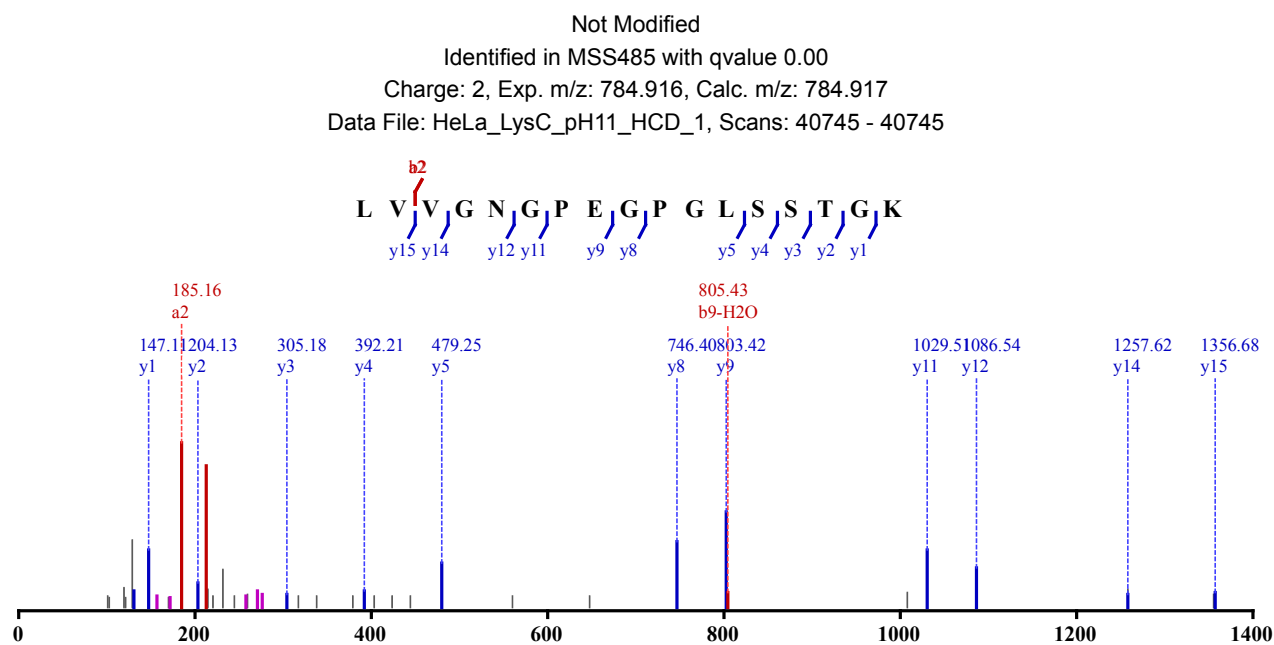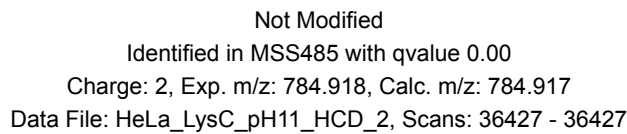

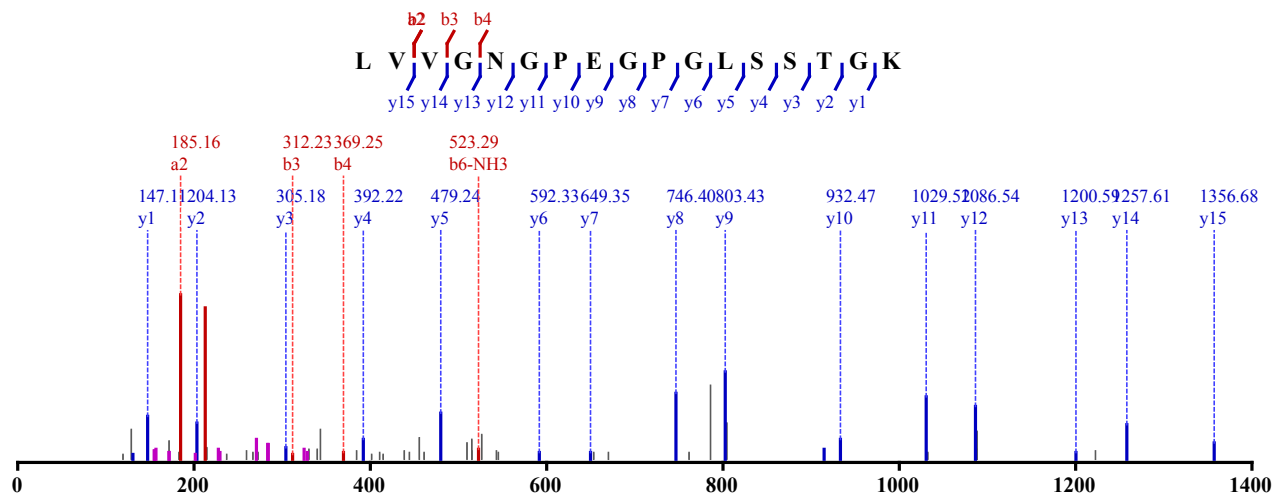

Not Modified  
 Identified in MSS485 with qvalue 0.00  
 Charge: 2, Exp. m/z: 784.919, Calc. m/z: 784.917  
 Data File: HeLa\_LysC\_pH11\_HCD\_3, Scans: 35585 - 35585

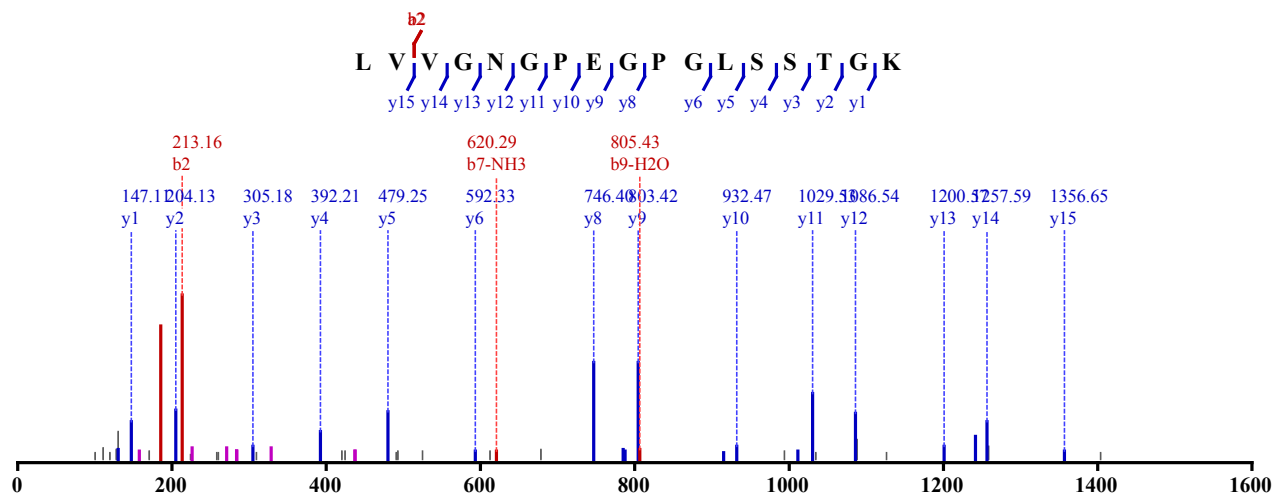

Not Modified  
 Identified in MSS110 with qvalue 0.00  
 Charge: 2, Exp. m/z: 440.797, Calc. m/z: 440.797  
 Data File: HeLa\_LysC-try\_CID\_1, Scans: 34770 - 34770

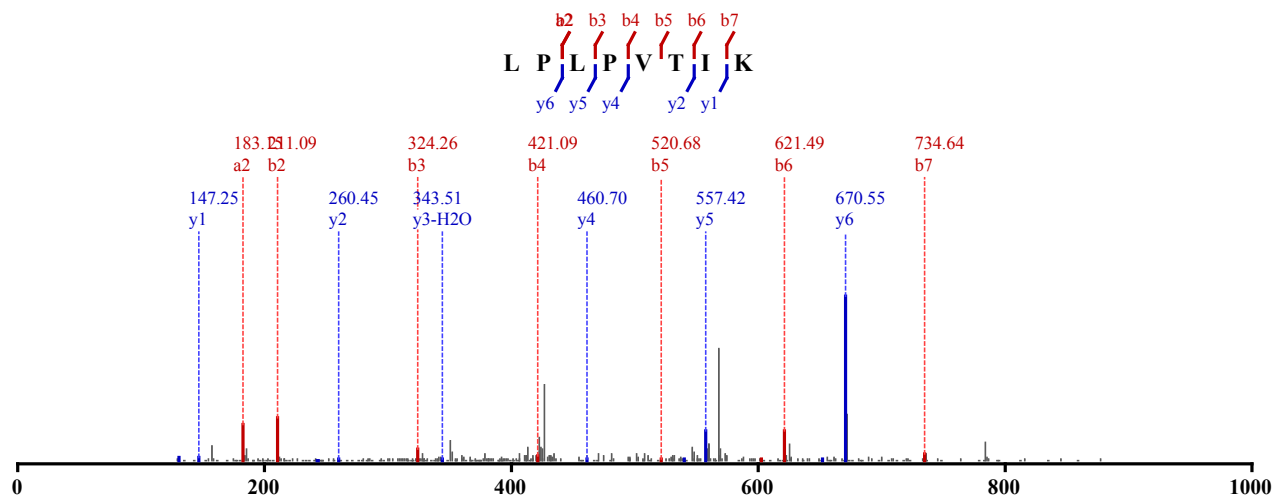

Not Modified  
 Identified in MSS113 with qvalue 0.00  
 Charge: 2, Exp. m/z: 440.797, Calc. m/z: 440.797

Data File: HeLa\_try\_CID\_1, Scans: 36867 - 36867

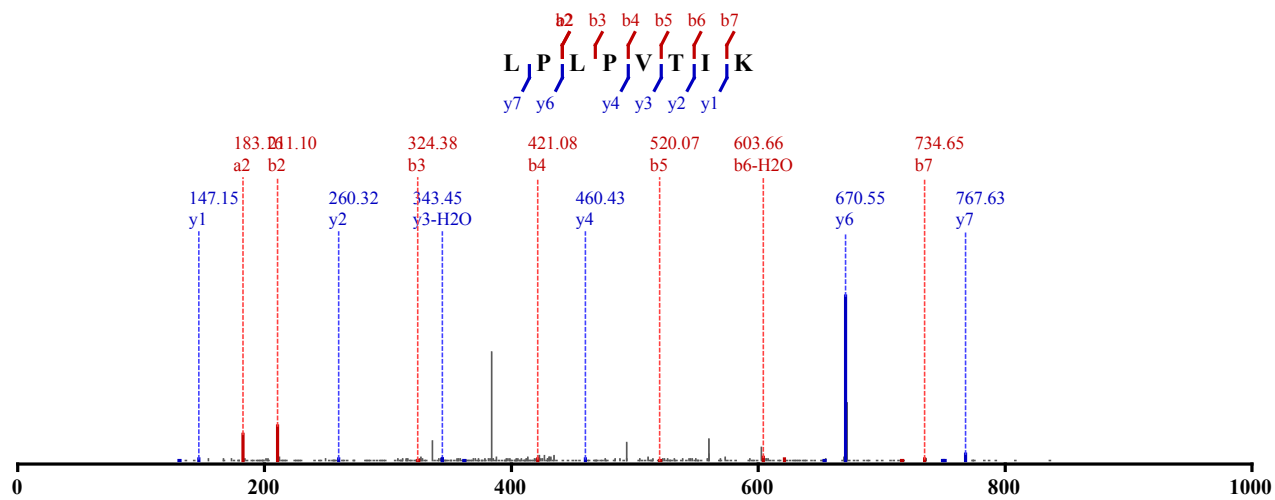

Not Modified

Identified in MSS113 with qvalue 0.00

Charge: 2, Exp. m/z: 440.798, Calc. m/z: 440.797

Data File: HeLa\_try\_CID\_3, Scans: 36371 - 36371

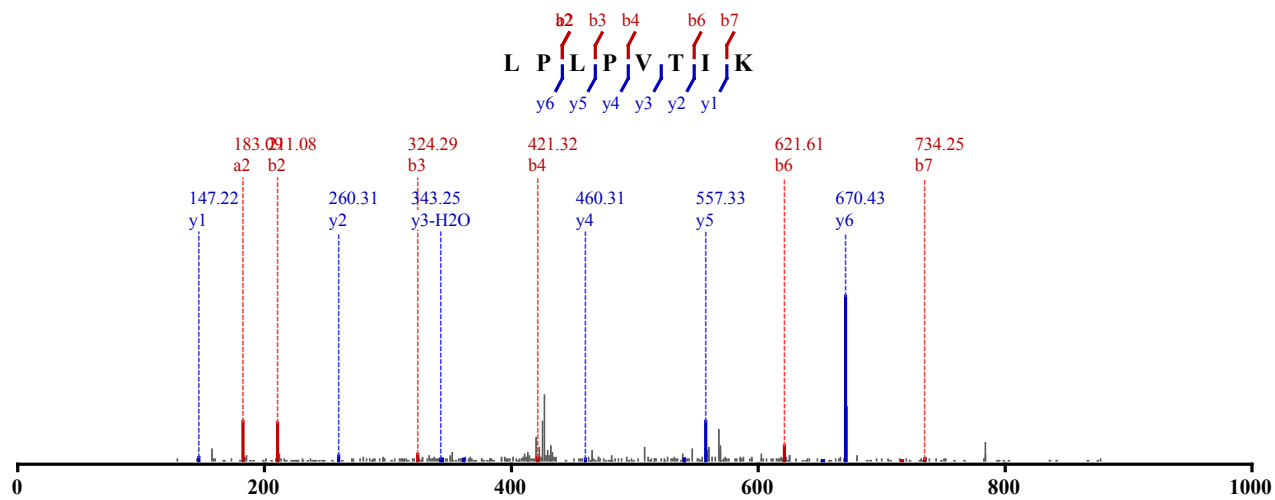

Not Modified

Identified in MSS113 with qvalue 0.00

Charge: 2, Exp. m/z: 440.797, Calc. m/z: 440.797

Data File: HeLa\_try\_CID\_1, Scans: 34596 - 34596

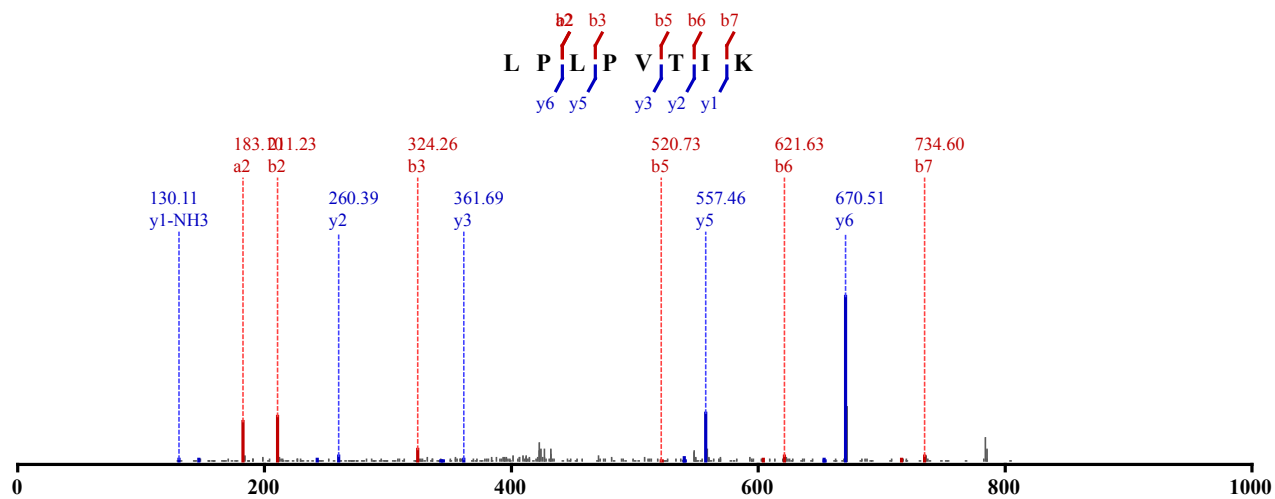

Not Modified

Identified in MSS122 with qvalue 0.00  
 Charge: 2, Exp. m/z: 440.799, Calc. m/z: 440.797  
 Data File: HeLa\_try\_HCD\_1, Scans: 37421 - 37421

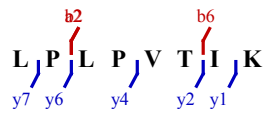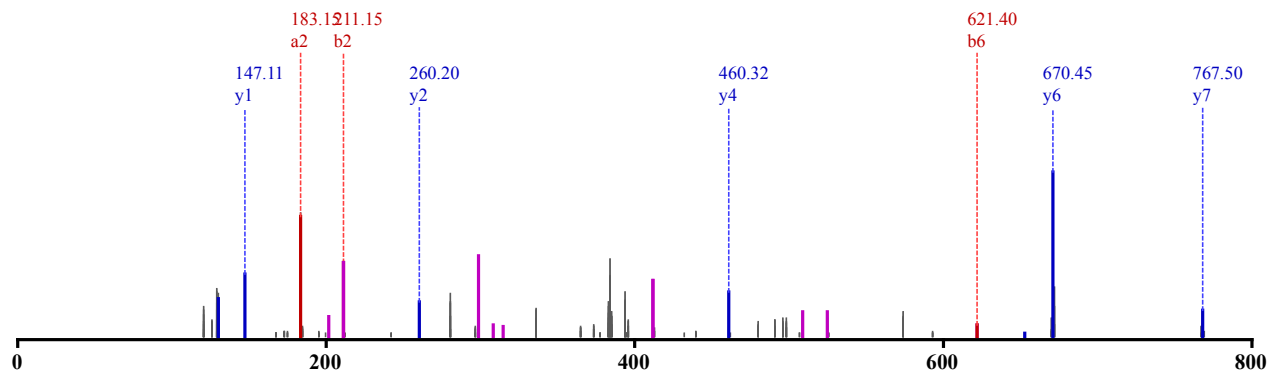

Not Modified  
 Identified in MSS130 with qvalue 0.00  
 Charge: 2, Exp. m/z: 440.797, Calc. m/z: 440.797  
 Data File: HeLa\_LysC-try\_HCD\_2, Scans: 40151 - 40151

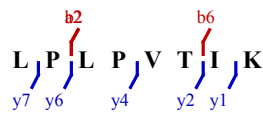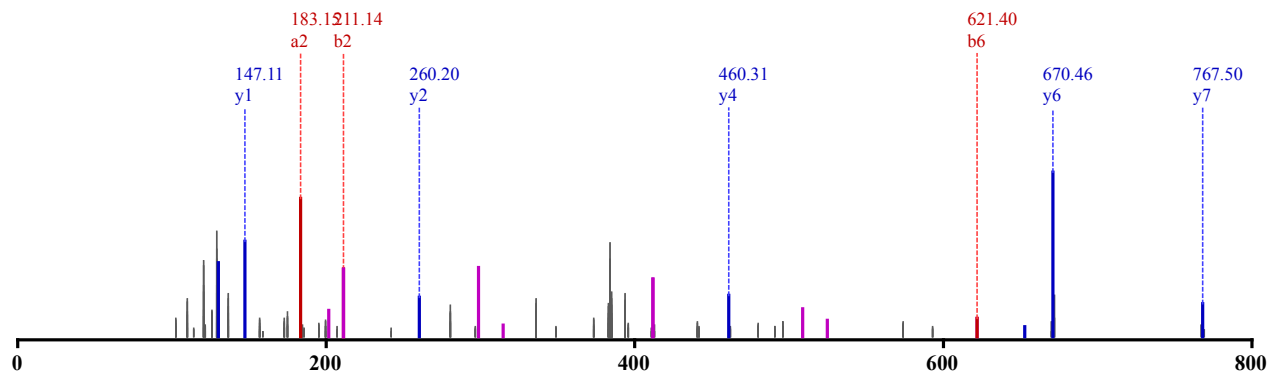

Not Modified  
 Identified in MSS130 with qvalue 0.00  
 Charge: 2, Exp. m/z: 440.797, Calc. m/z: 440.797  
 Data File: HeLa\_LysC-try\_HCD\_1, Scans: 33319 - 33319

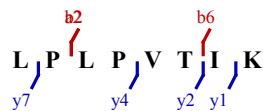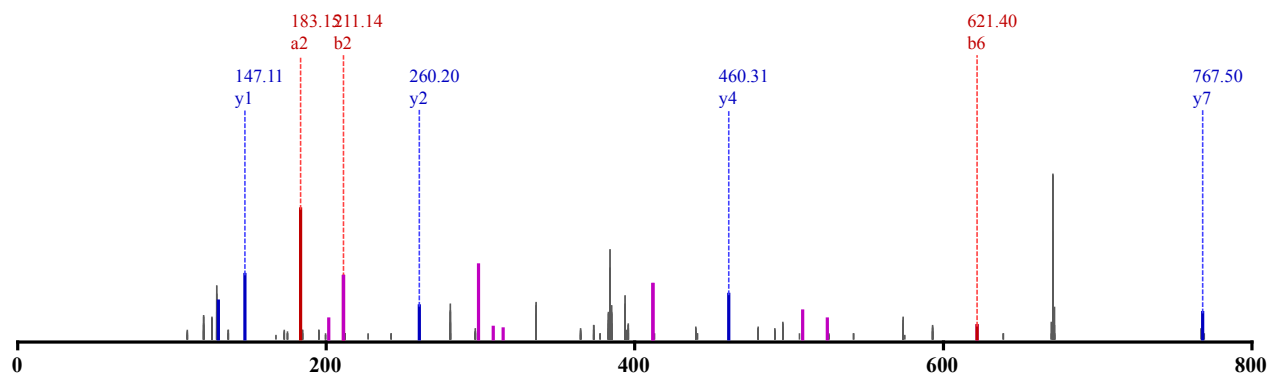

Not Modified

Identified in MSS241 with qvalue 0.00

Charge: 2, Exp. m/z: 440.797, Calc. m/z: 440.797

Data File: HeLa\_try\_CID-ETD\_1, Scans: 24520 - 24520

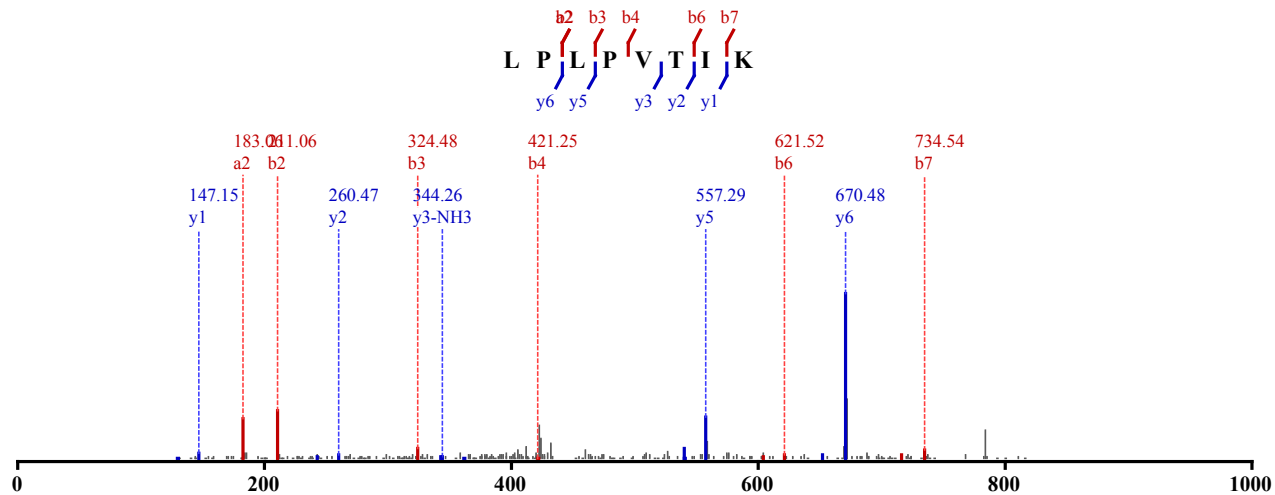

Not Modified

Identified in MSS241 with qvalue 0.00

Charge: 2, Exp. m/z: 440.798, Calc. m/z: 440.797

Data File: HeLa\_try\_CID-ETD\_2, Scans: 22250 - 22250

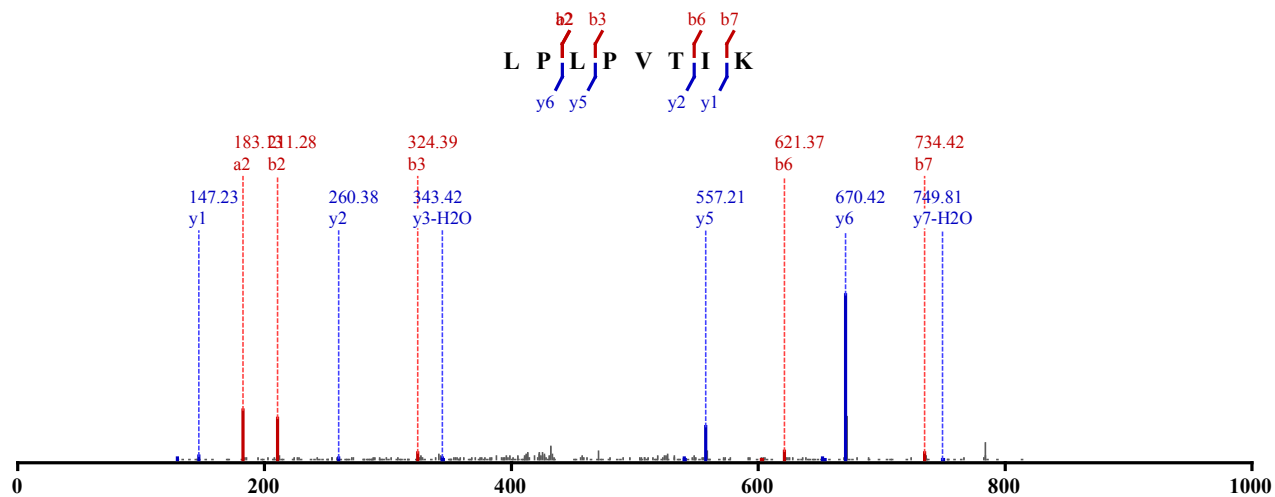

Not Modified

Identified in MSS241 with qvalue 0.00

Charge: 2, Exp. m/z: 440.797, Calc. m/z: 440.797

Data File: HeLa\_try\_CID-ETD\_2, Scans: 23472 - 23472

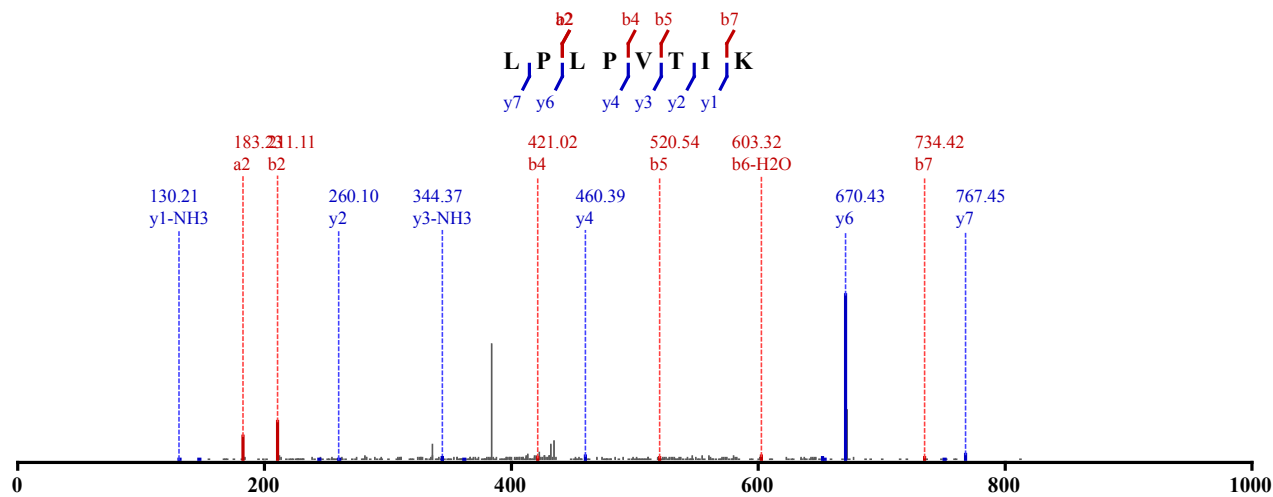

Not Modified  
 Identified in MSS480 with qvalue 0.01  
 Charge: 2, Exp. m/z: 440.797, Calc. m/z: 440.797  
 Data File: HeLa\_try\_pH11\_CID\_3xload\_2, Scans: 50026 - 50026

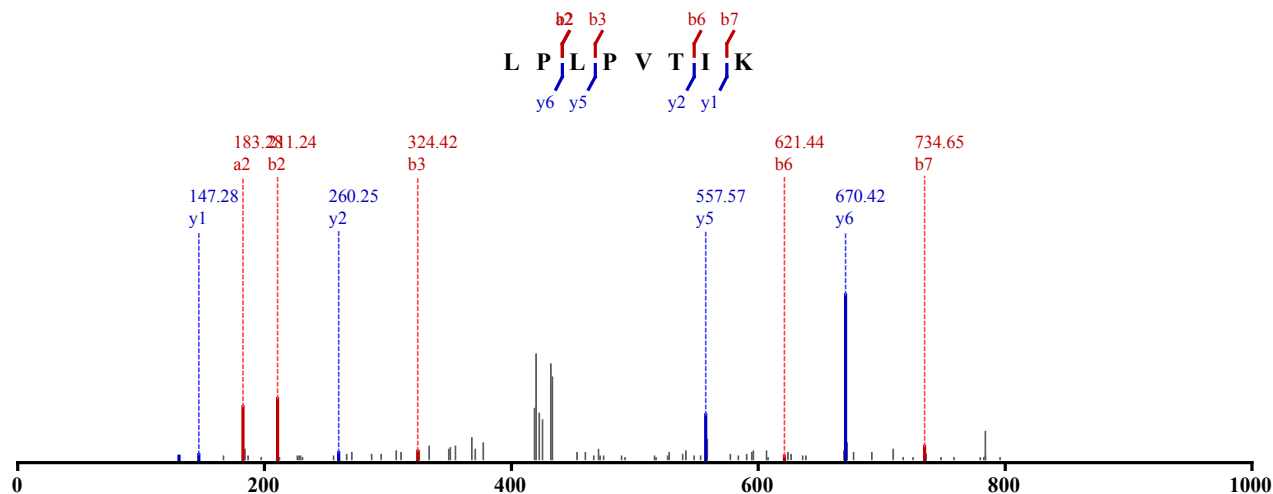

Not Modified  
 Identified in MSS480 with qvalue 0.01  
 Charge: 2, Exp. m/z: 440.797, Calc. m/z: 440.797  
 Data File: HeLa\_try\_pH11\_CID\_3xload, Scans: 45365 - 45365

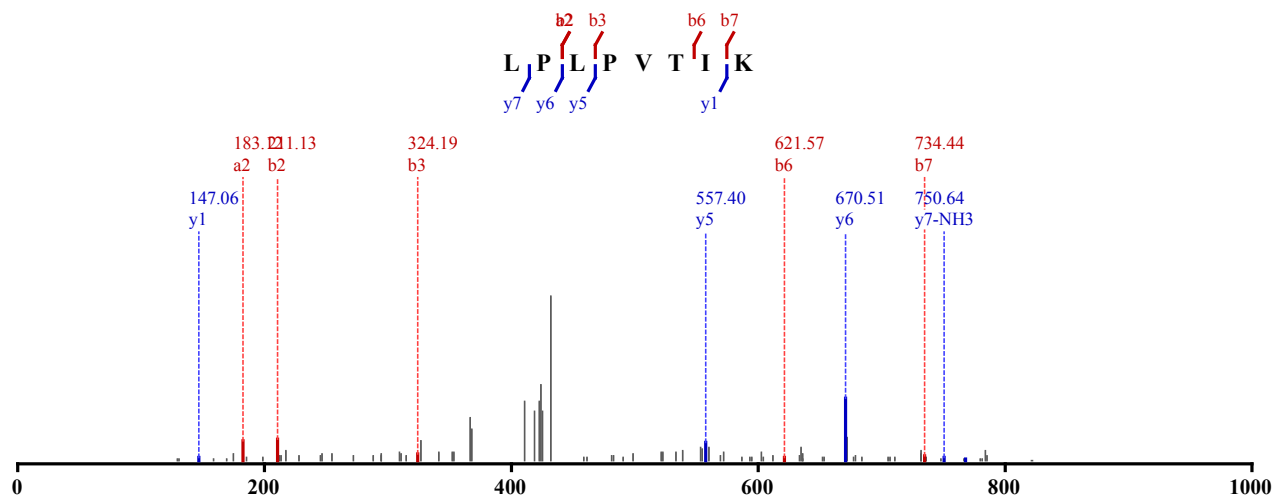

Not Modified  
 Identified in MSS480 with qvalue 0.00  
 Charge: 2, Exp. m/z: 440.797, Calc. m/z: 440.797



Data File: HeLa\_try\_pH11\_CID\_3xload, Scans: 45606 - 45606

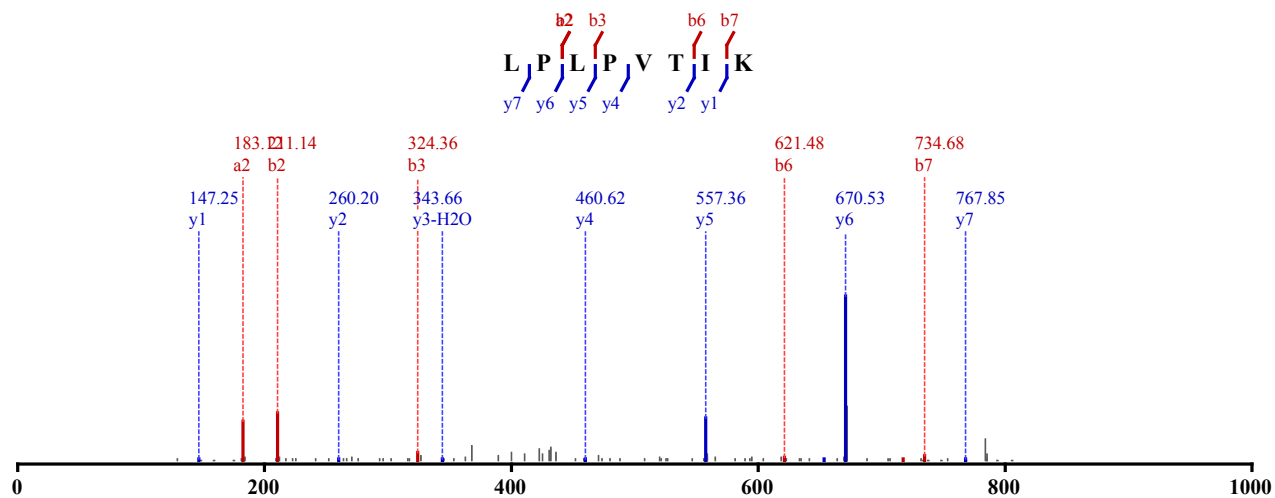

Not Modified

Identified in MSS480 with qvalue 0.01

Charge: 2, Exp. m/z: 440.799, Calc. m/z: 440.797

Data File: HeLa\_try\_pH3\_CID\_3xload\_3, Scans: 2284 - 2284

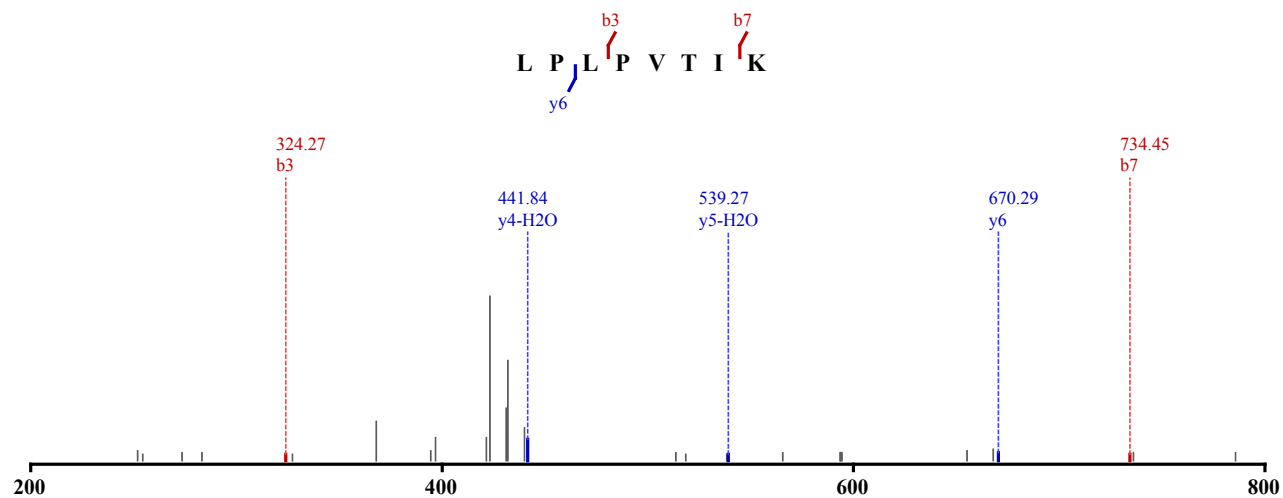

Not Modified

Identified in MSS480 with qvalue 0.00

Charge: 2, Exp. m/z: 440.797, Calc. m/z: 440.797

Data File: HeLa\_try\_pH8\_CID\_3xload\_3, Scans: 50653 - 50653

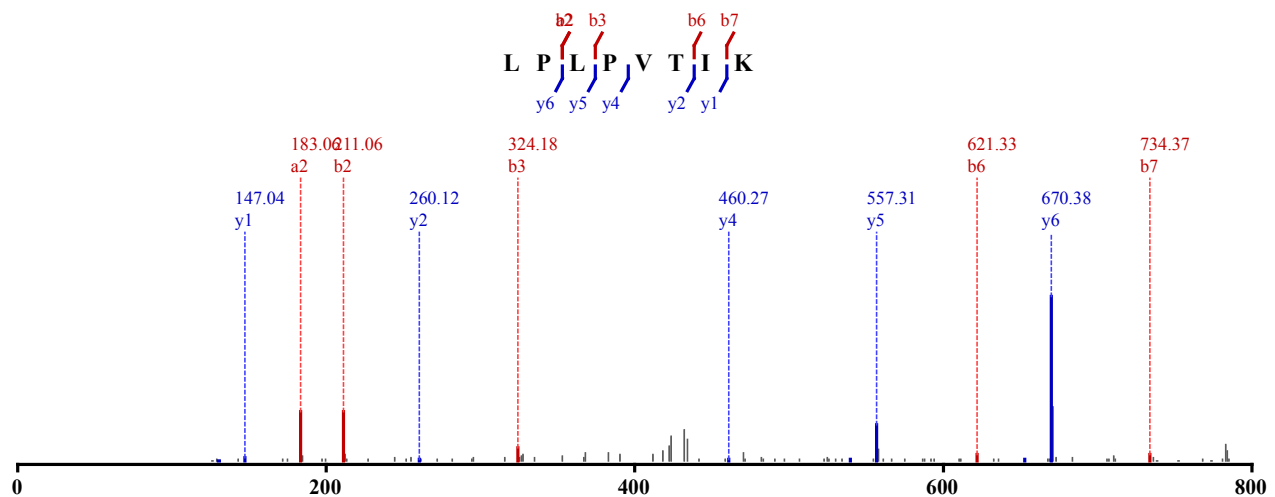

Not Modified

Identified in MSS480 with qvalue 0.00  
 Charge: 2, Exp. m/z: 440.797, Calc. m/z: 440.797  
 Data File: HeLa\_try\_pH11\_CID\_3xload\_2, Scans: 49941 - 49941

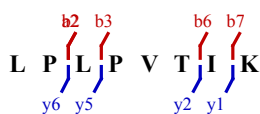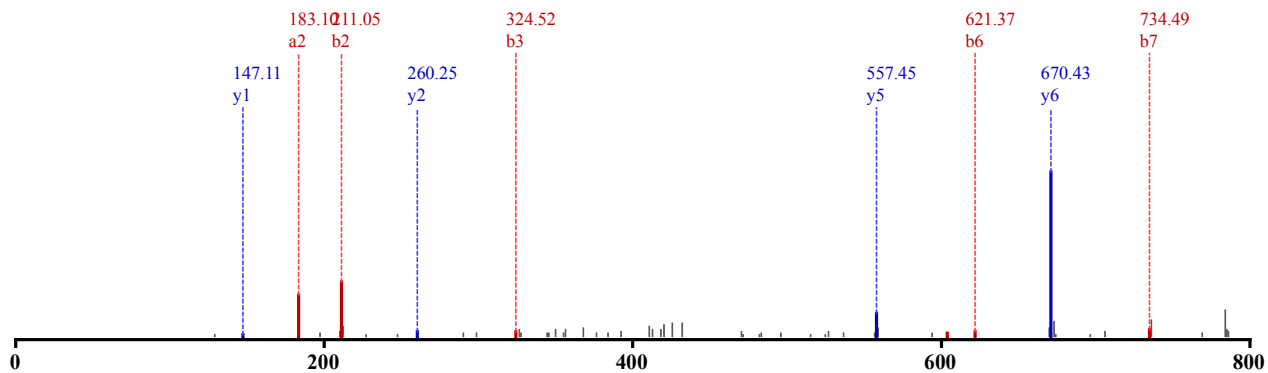

Not Modified  
 Identified in MSS480 with qvalue 0.00  
 Charge: 2, Exp. m/z: 440.796, Calc. m/z: 440.797  
 Data File: HeLa\_try\_pH11\_CID\_3xload\_3, Scans: 55408 - 55408

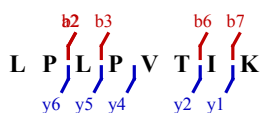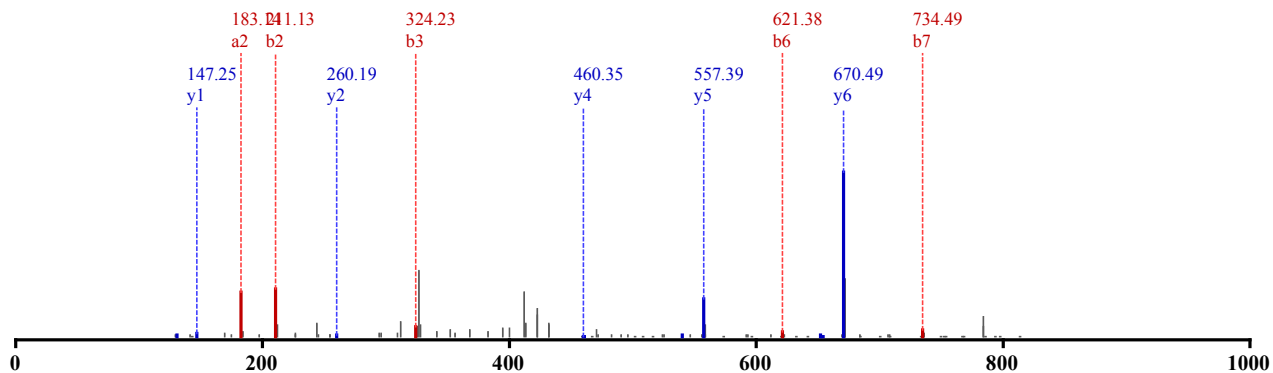

Not Modified  
 Identified in MSS480 with qvalue 0.00  
 Charge: 2, Exp. m/z: 440.797, Calc. m/z: 440.797  
 Data File: HeLa\_try\_pH11\_CID\_3xload\_3, Scans: 55487 - 55487

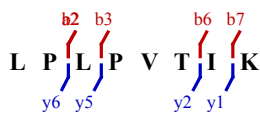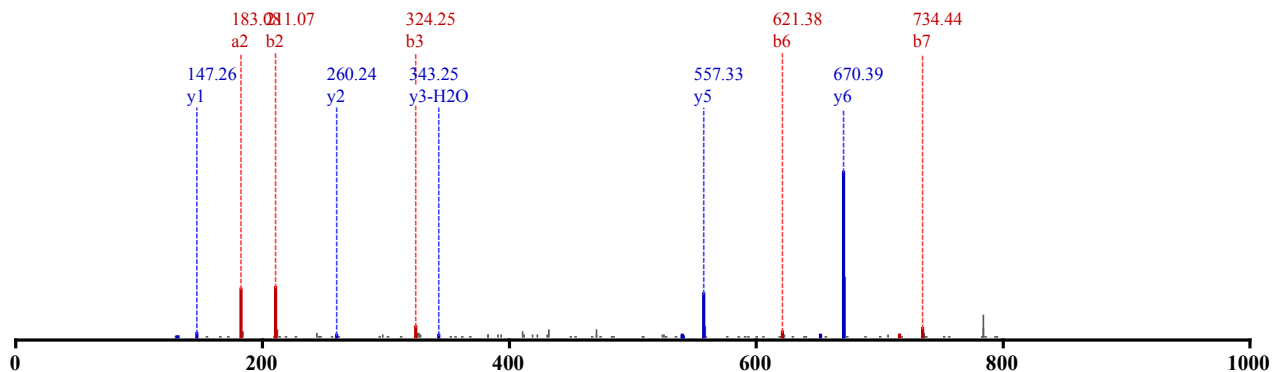

Not Modified  
 Identified in MSS480 with qvalue 0.00  
 Charge: 2, Exp. m/z: 440.797, Calc. m/z: 440.797  
 Data File: HeLa\_try\_pH11\_CID\_3xload\_3, Scans: 55571 - 55571

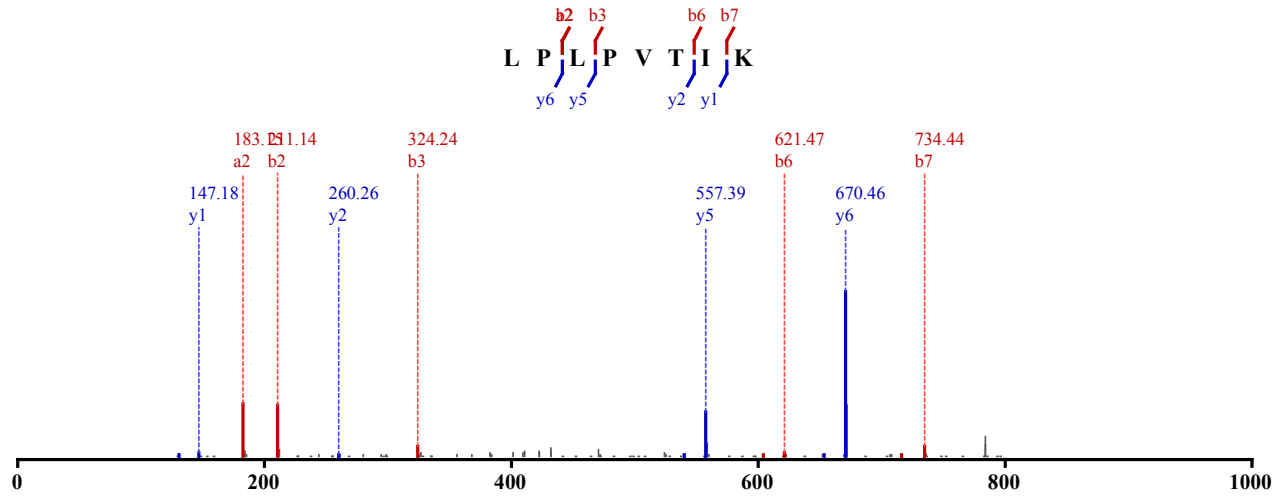

Not Modified  
 Identified in MSS480 with qvalue 0.00  
 Charge: 2, Exp. m/z: 440.797, Calc. m/z: 440.797  
 Data File: HeLa\_try\_pH11\_CID\_3xload\_3, Scans: 55654 - 55654

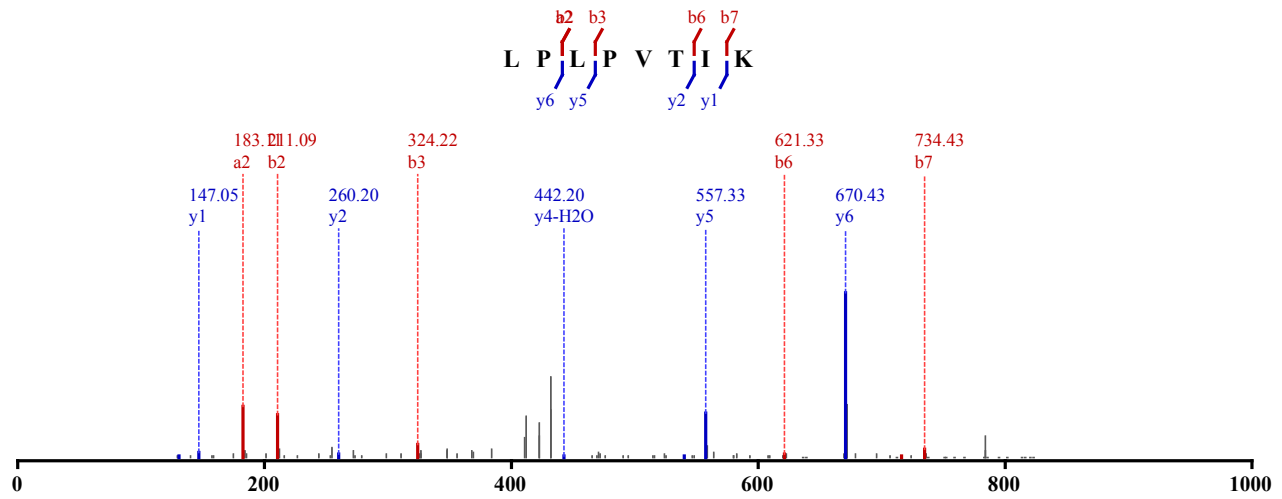

Not Modified  
 Identified in MSS480 with qvalue 0.01  
 Charge: 2, Exp. m/z: 440.797, Calc. m/z: 440.797  
 Data File: HeLa\_try\_pH11\_CID\_3xload\_3, Scans: 55753 - 55753

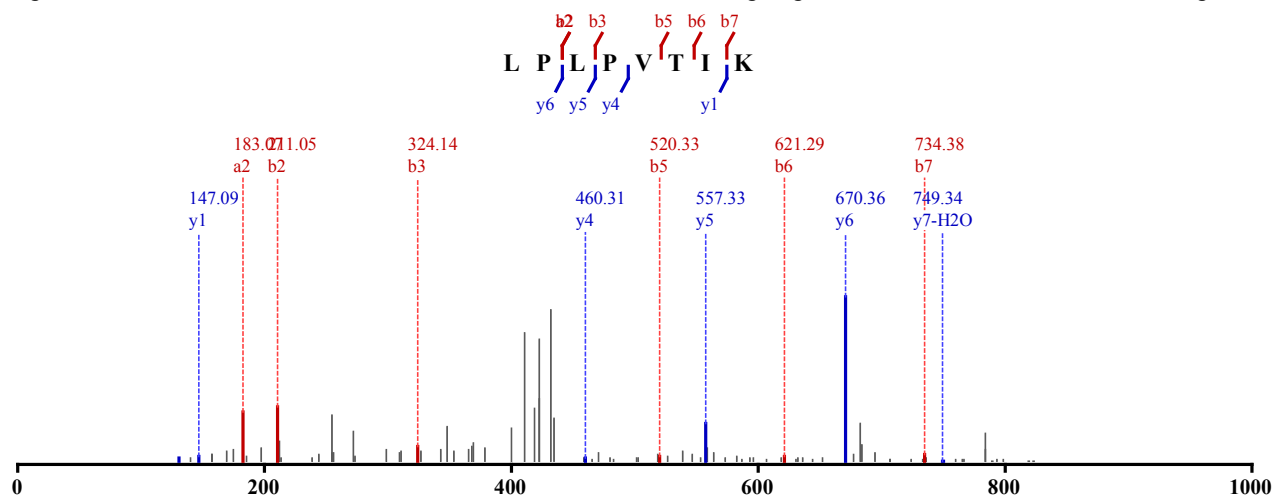

Not Modified

Identified in MSS480 with qvalue 0.00

Charge: 2, Exp. m/z: 440.797, Calc. m/z: 440.797

Data File: HeLa\_try\_pH11\_CID\_3xload, Scans: 45522 - 45522

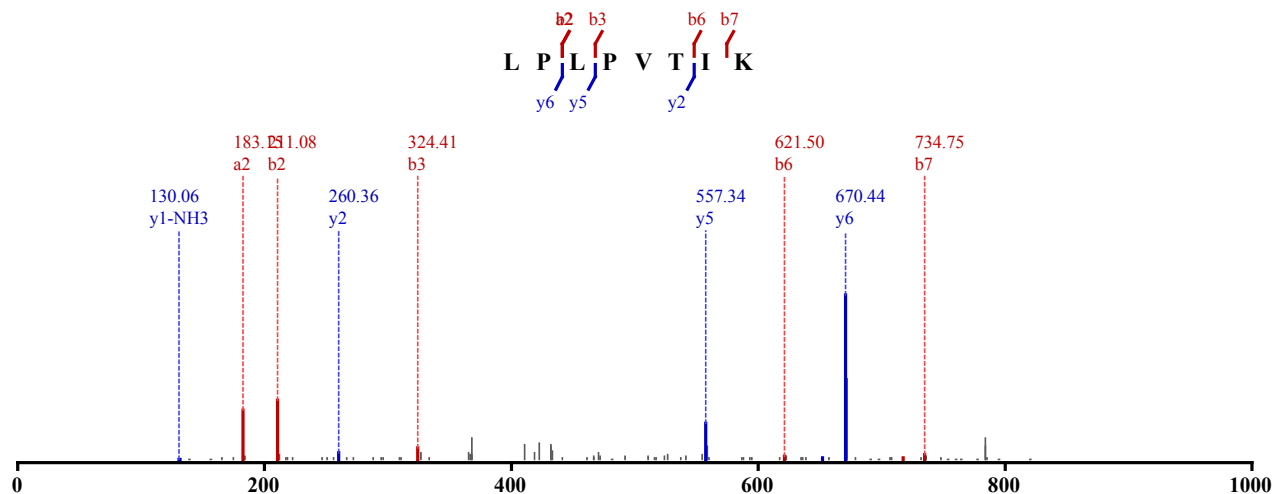

Not Modified

Identified in MSS480 with qvalue 0.01

Charge: 2, Exp. m/z: 440.797, Calc. m/z: 440.797

Data File: HeLa\_try\_pH11\_CID\_3xload, Scans: 45690 - 45690

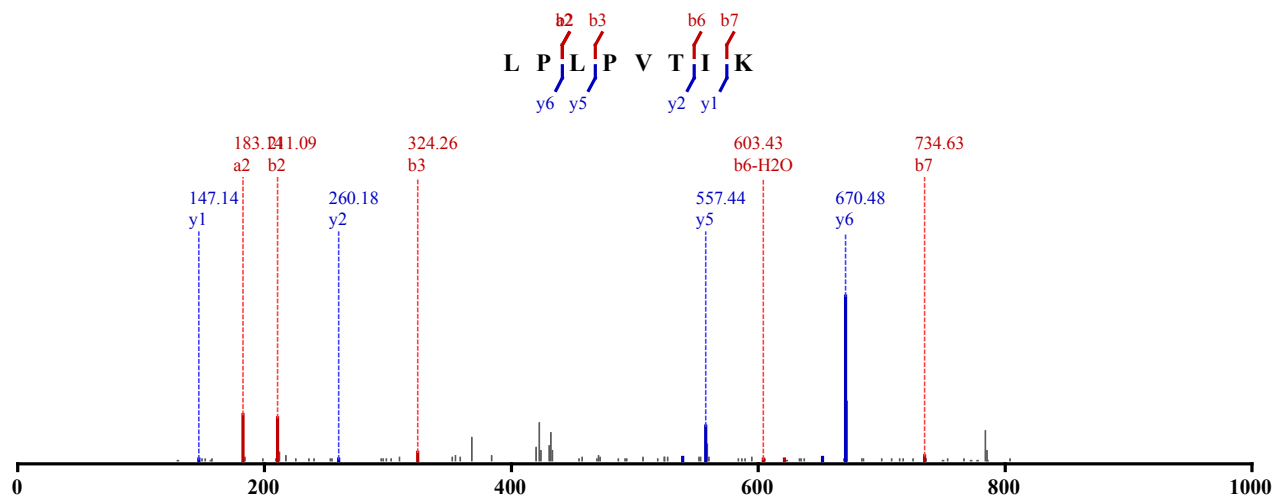

Not Modified

Identified in MSS480 with qvalue 0.01

Charge: 2, Exp. m/z: 440.797, Calc. m/z: 440.797

Data File: HeLa\_try\_pH8\_CID\_3xload\_2, Scans: 41868 - 41868

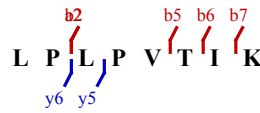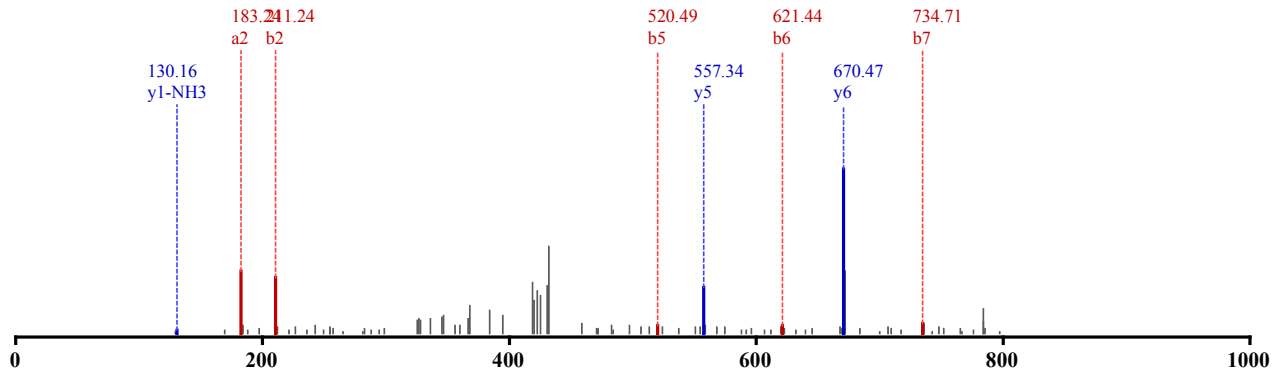

Not Modified

Identified in MSS480 with qvalue 0.00

Charge: 2, Exp. m/z: 440.797, Calc. m/z: 440.797

Data File: HeLa\_try\_pH8\_CID\_3xload\_3, Scans: 50574 - 50574

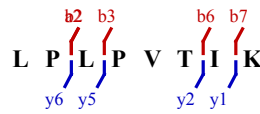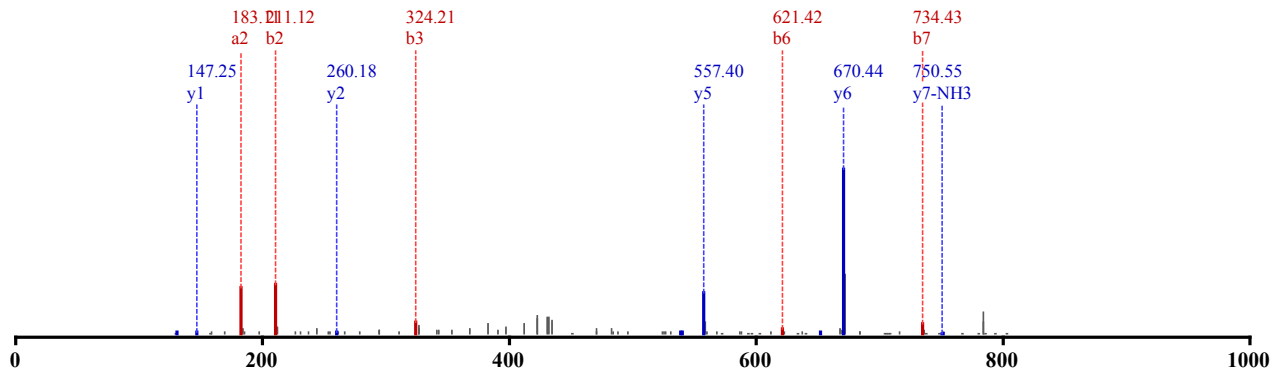

Not Modified

Identified in MSS484 with qvalue 0.00

Charge: 2, Exp. m/z: 440.797, Calc. m/z: 440.797

Data File: HeLa\_Try\_pH5\_HCD\_3, Scans: 36816 - 36816

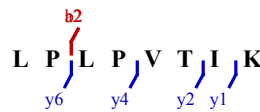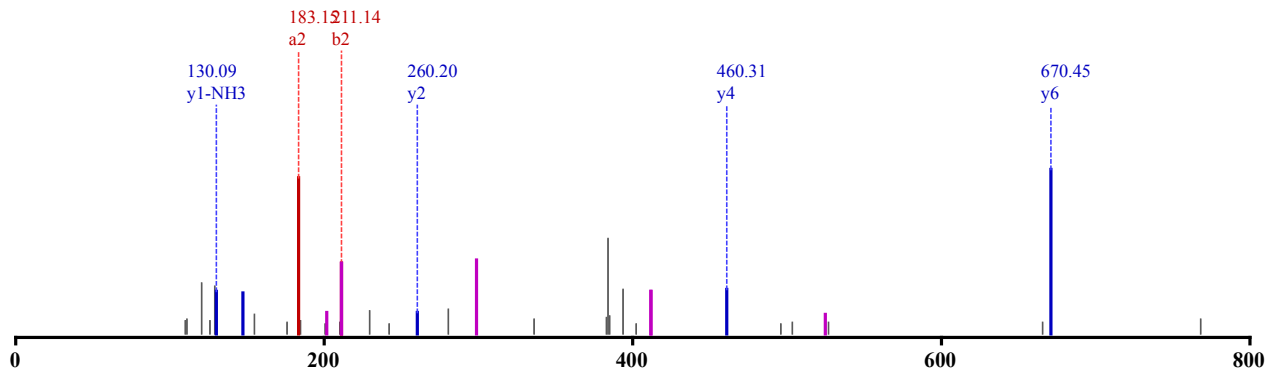

Not Modified

Identified in MSS484 with qvalue 0.01  
 Charge: 2, Exp. m/z: 440.797, Calc. m/z: 440.797  
 Data File: HeLa\_Try\_pH8\_HCD\_1, Scans: 47308 - 47308

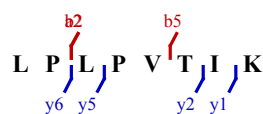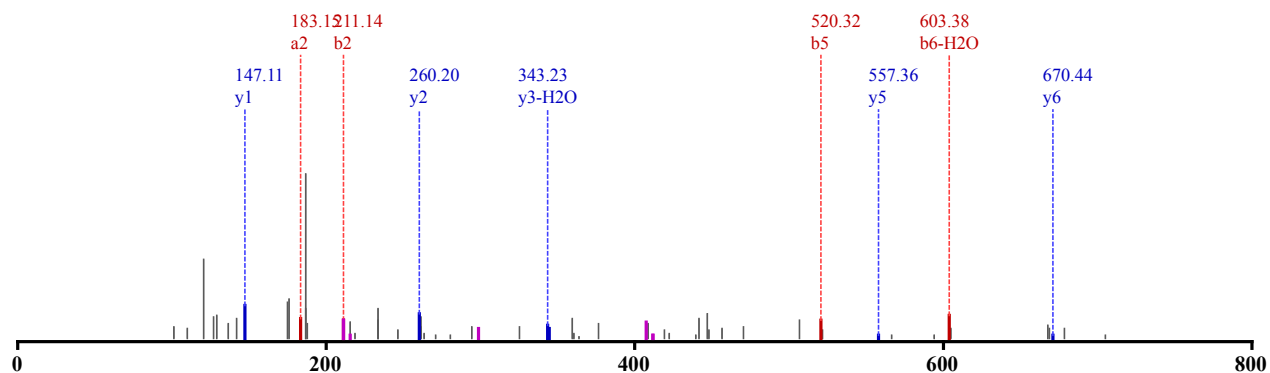

Not Modified  
 Identified in MSS484 with qvalue 0.00  
 Charge: 2, Exp. m/z: 440.797, Calc. m/z: 440.797  
 Data File: HeLa\_Try\_pH8\_HCD\_2, Scans: 43976 - 43976

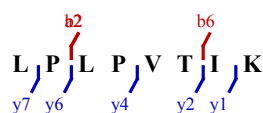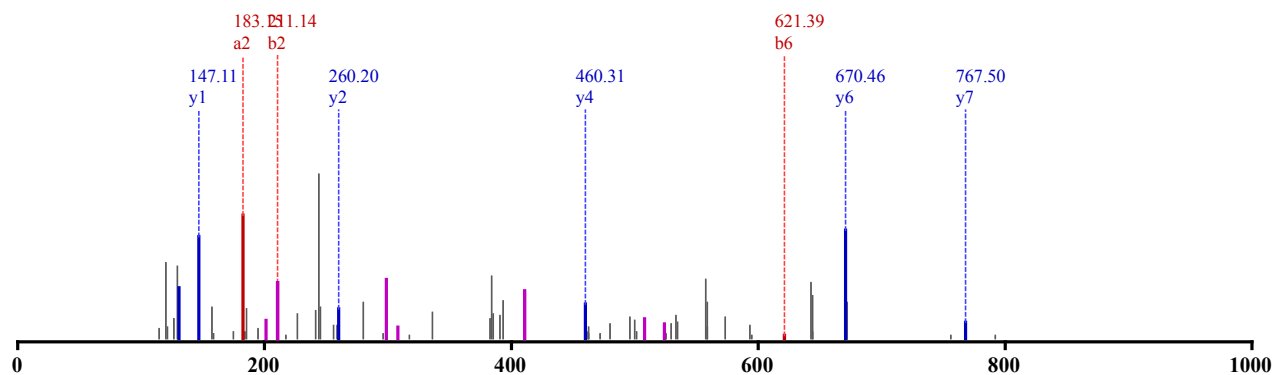

Not Modified  
 Identified in MSS484 with qvalue 0.01  
 Charge: 2, Exp. m/z: 440.797, Calc. m/z: 440.797  
 Data File: HeLa\_Try\_pH8\_HCD\_3, Scans: 43801 - 43801

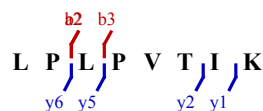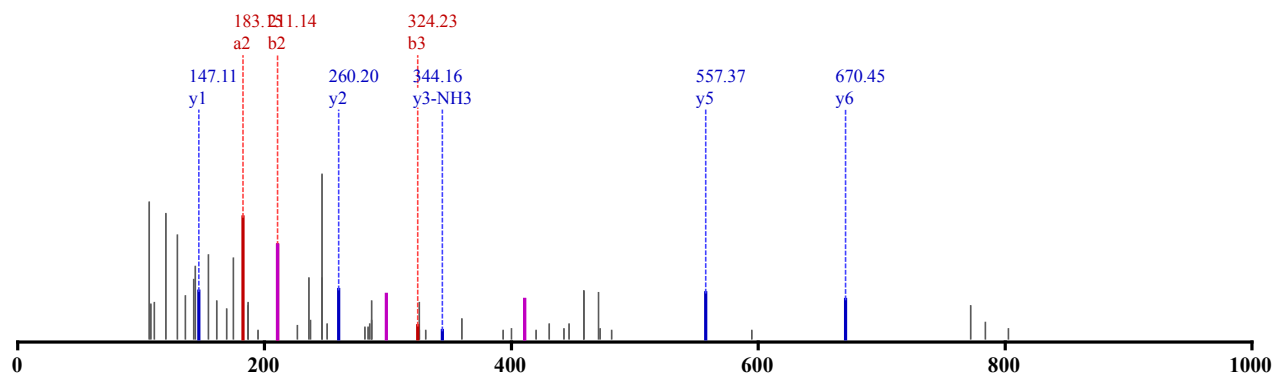

Not Modified  
 Identified in MSS484 with qvalue 0.00  
 Charge: 2, Exp. m/z: 440.797, Calc. m/z: 440.797  
 Data File: HeLa\_Try\_pH11\_HCD\_1, Scans: 51207 - 51207

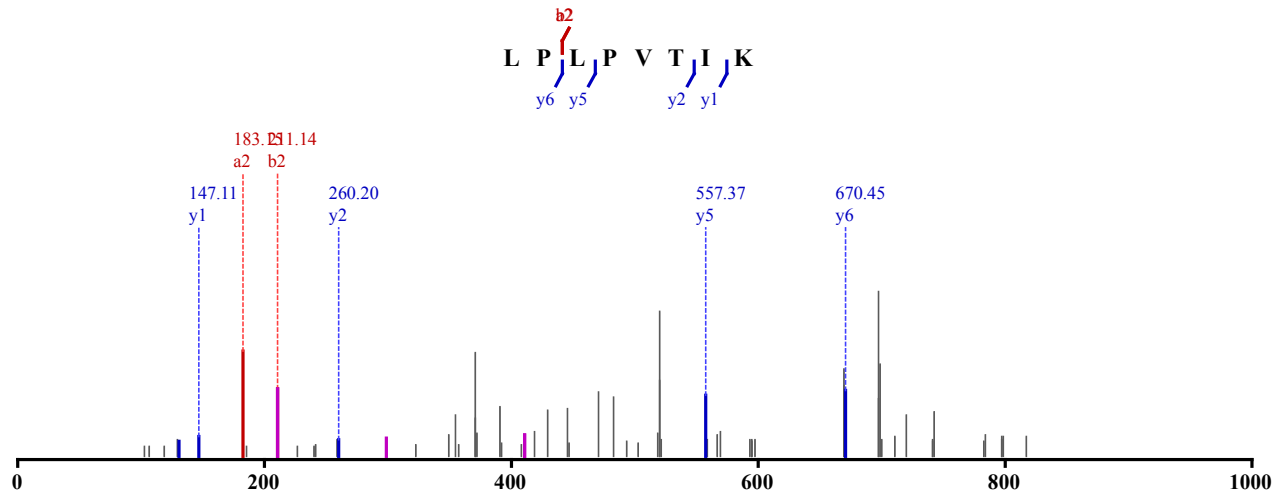

Not Modified  
 Identified in MSS484 with qvalue 0.00  
 Charge: 2, Exp. m/z: 440.797, Calc. m/z: 440.797  
 Data File: HeLa\_Try\_pH11\_HCD\_2, Scans: 52532 - 52532

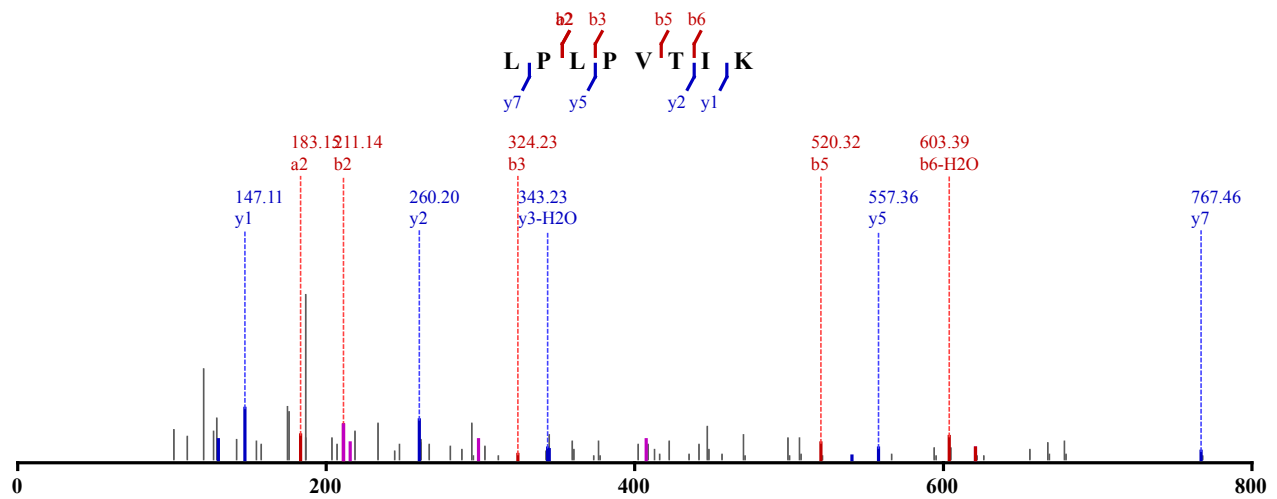

Not Modified  
 Identified in MSS485 with qvalue 0.00  
 Charge: 2, Exp. m/z: 440.798, Calc. m/z: 440.797  
 Data File: HeLa\_LysC\_pH8\_HCD\_2, Scans: 43231 - 43231

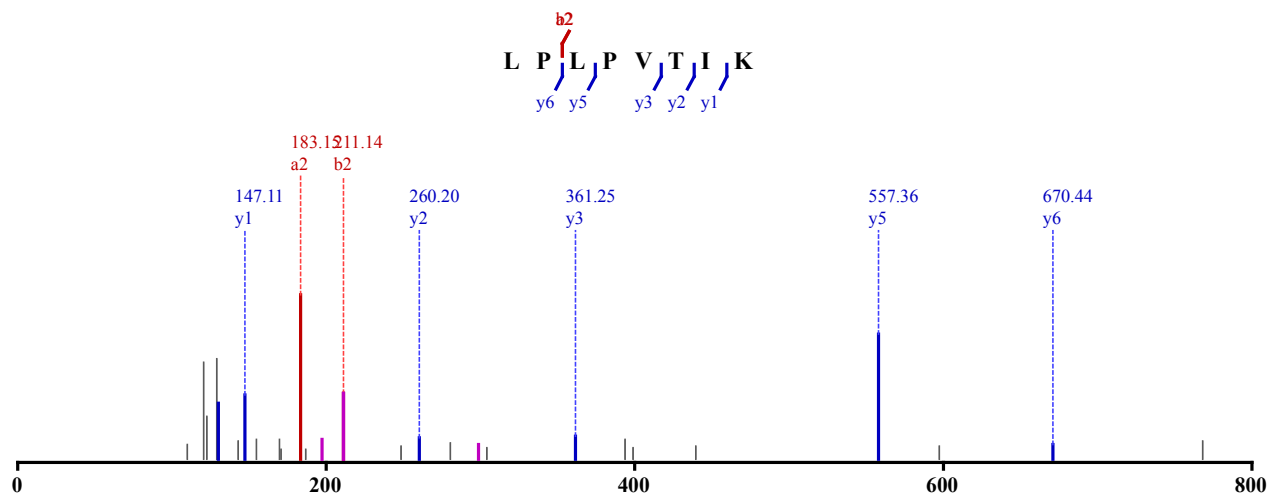

Not Modified

Identified in MSS485 with qvalue 0.00

Charge: 2, Exp. m/z: 440.797, Calc. m/z: 440.797

Data File: HeLa\_LysC\_pH8\_HCD\_3, Scans: 42627 - 42627

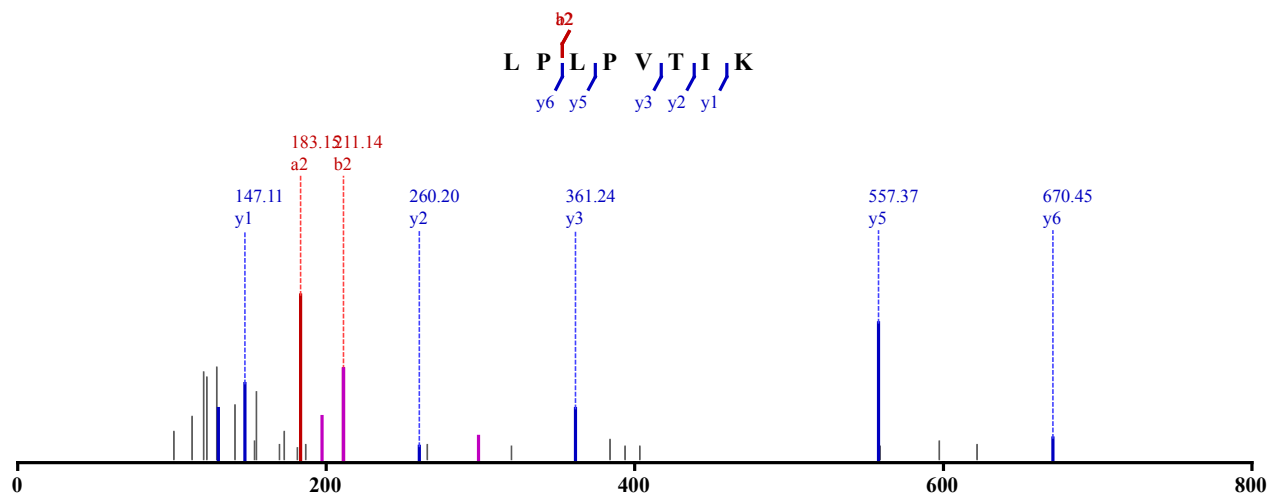

Not Modified

Identified in MSS485 with qvalue 0.01

Charge: 2, Exp. m/z: 440.797, Calc. m/z: 440.797

Data File: HeLa\_LysC\_pH6\_HCD\_2, Scans: 44331 - 44331

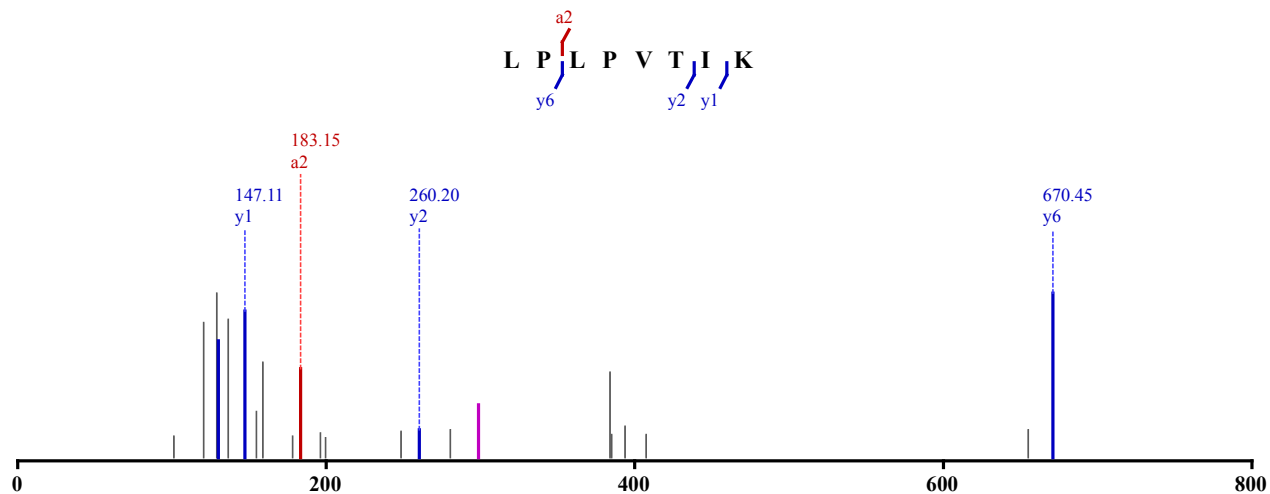

Not Modified

Identified in MSS487 with qvalue 0.00

Charge: 2, Exp. m/z: 440.797, Calc. m/z: 440.797



Data File: HeLa\_ArgC-Try\_pH2\_HCD\_2, Scans: 35229 - 35229

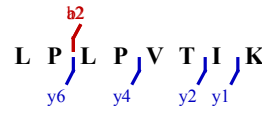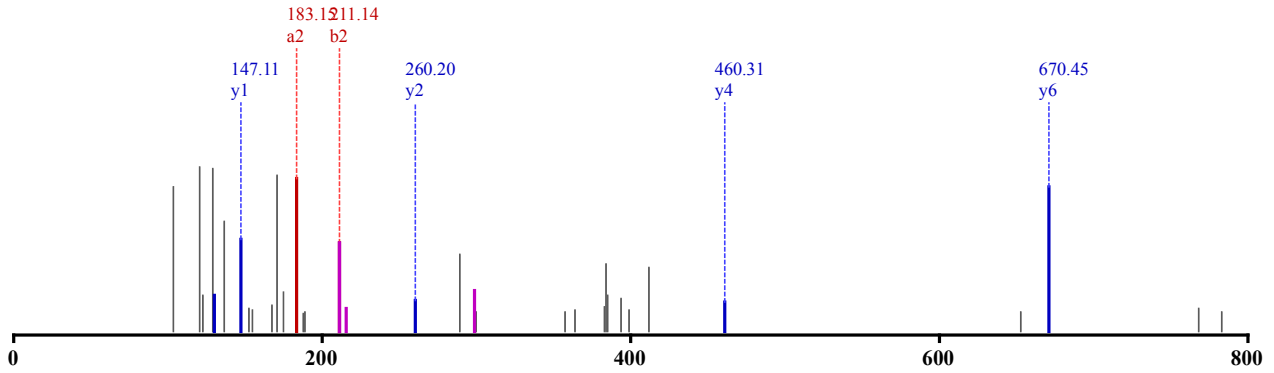

Not Modified

Identified in MSS487 with qvalue 0.00

Charge: 2, Exp. m/z: 440.797, Calc. m/z: 440.797

Data File: HeLa\_ArgC-Try\_pH4\_HCD\_1, Scans: 33453 - 33453

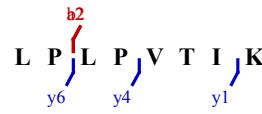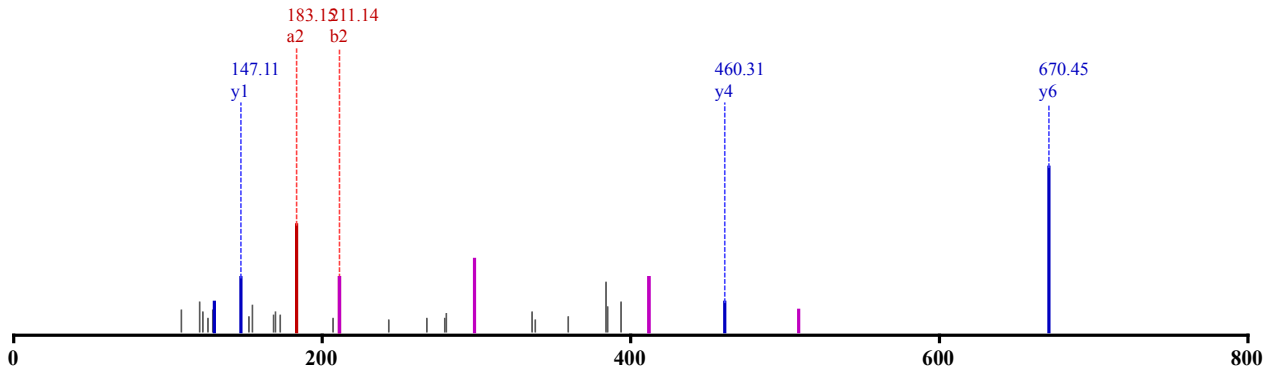

Not Modified

Identified in MSS487 with qvalue 0.00

Charge: 2, Exp. m/z: 440.797, Calc. m/z: 440.797

Data File: HeLa\_ArgC-Try\_pH4\_HCD\_1, Scans: 33520 - 33520

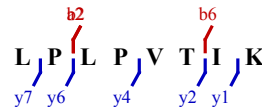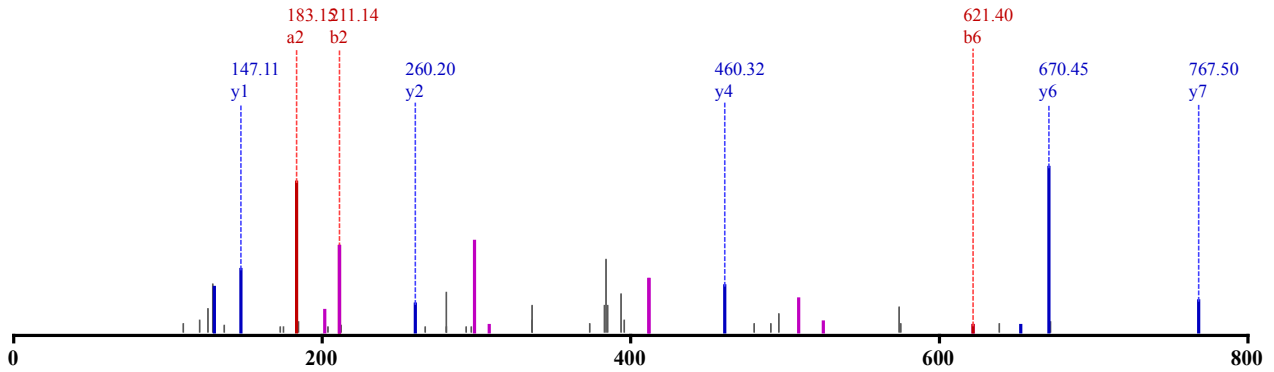

Not Modified

Identified in MSS487 with qvalue 0.00  
 Charge: 2, Exp. m/z: 440.797, Calc. m/z: 440.797  
 Data File: HeLa\_ArgC-Try\_pH5\_HCD\_1, Scans: 33610 - 33610

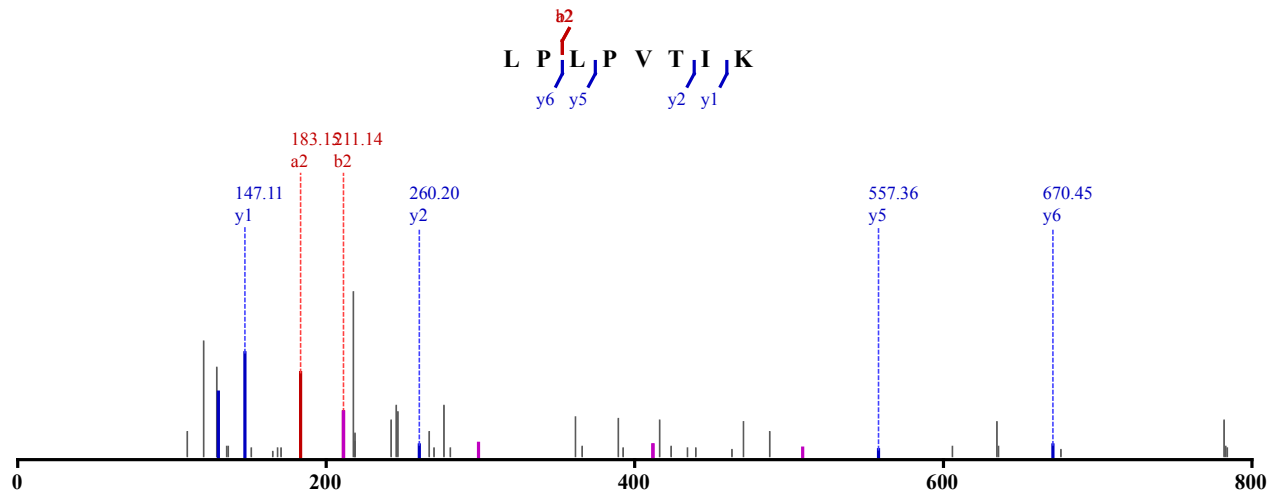

Not Modified  
 Identified in MSS487 with qvalue 0.00  
 Charge: 2, Exp. m/z: 440.797, Calc. m/z: 440.797  
 Data File: HeLa\_ArgC-Try\_pH5\_HCD\_3, Scans: 39507 - 39507

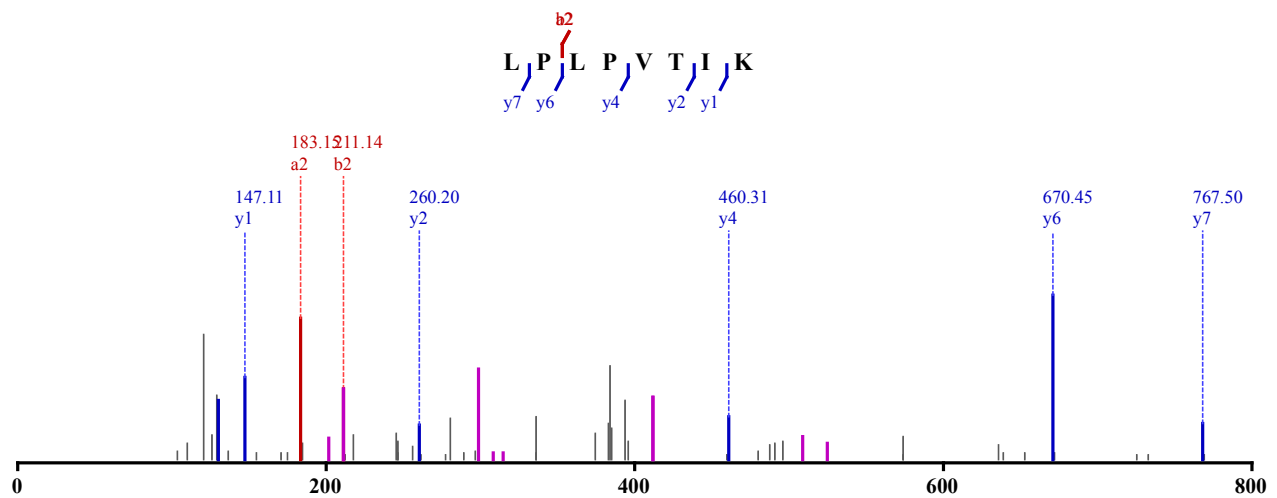

Not Modified  
 Identified in MSS487 with qvalue 0.00  
 Charge: 2, Exp. m/z: 440.796, Calc. m/z: 440.797  
 Data File: HeLa\_ArgC-Try\_pH5\_HCD\_3, Scans: 39439 - 39439

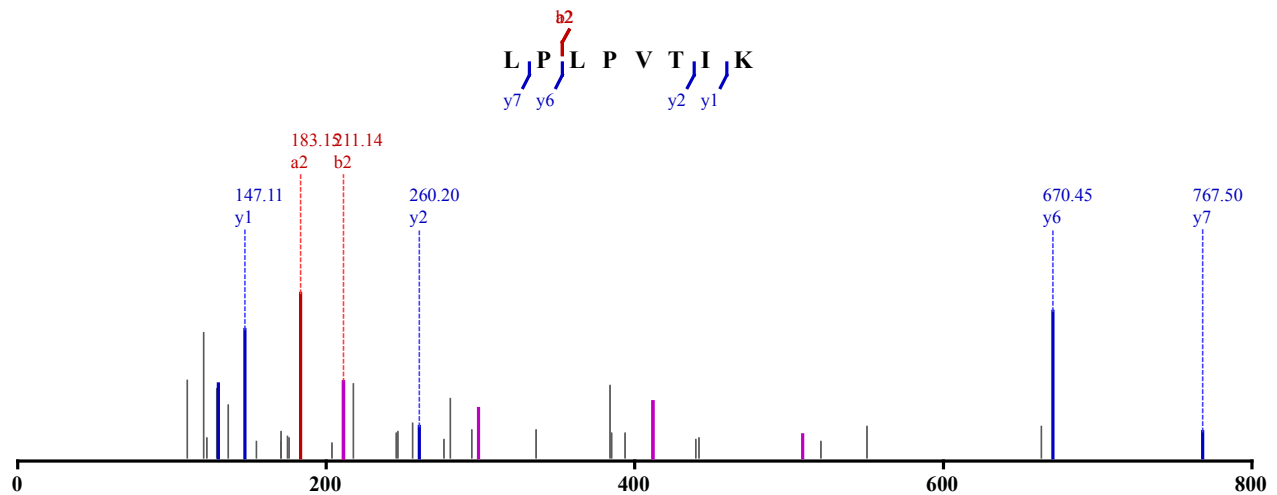

Not Modified

Identified in MSS487 with qvalue 0.00

Charge: 2, Exp. m/z: 440.797, Calc. m/z: 440.797

Data File: HeLa\_ArgC-Try\_pH6\_HCD\_1, Scans: 34904 - 34904

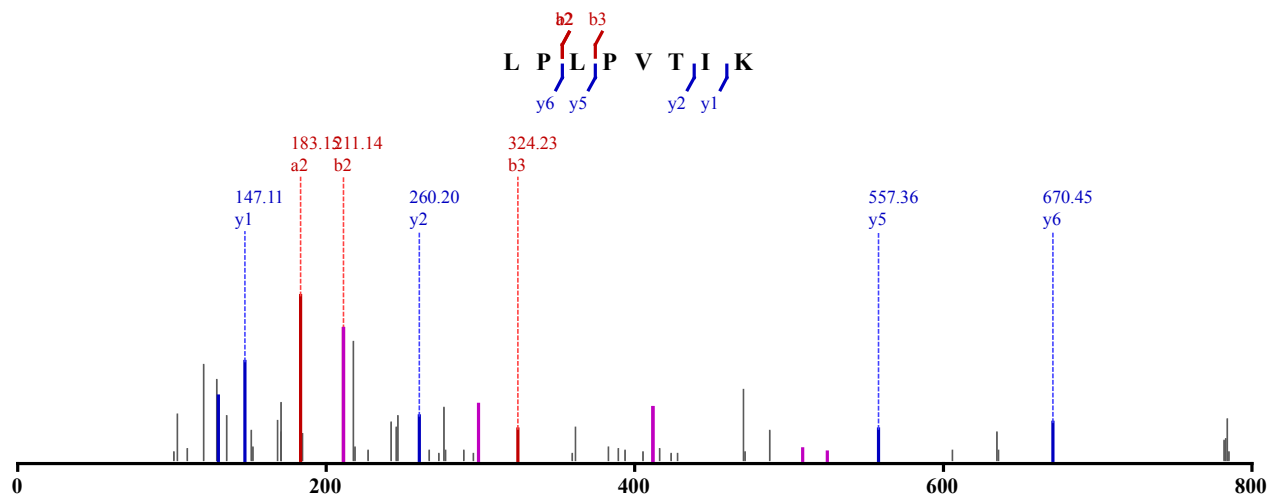

Not Modified

Identified in MSS487 with qvalue 0.00

Charge: 2, Exp. m/z: 440.797, Calc. m/z: 440.797

Data File: HeLa\_ArgC-Try\_pH6\_HCD\_1, Scans: 36277 - 36277

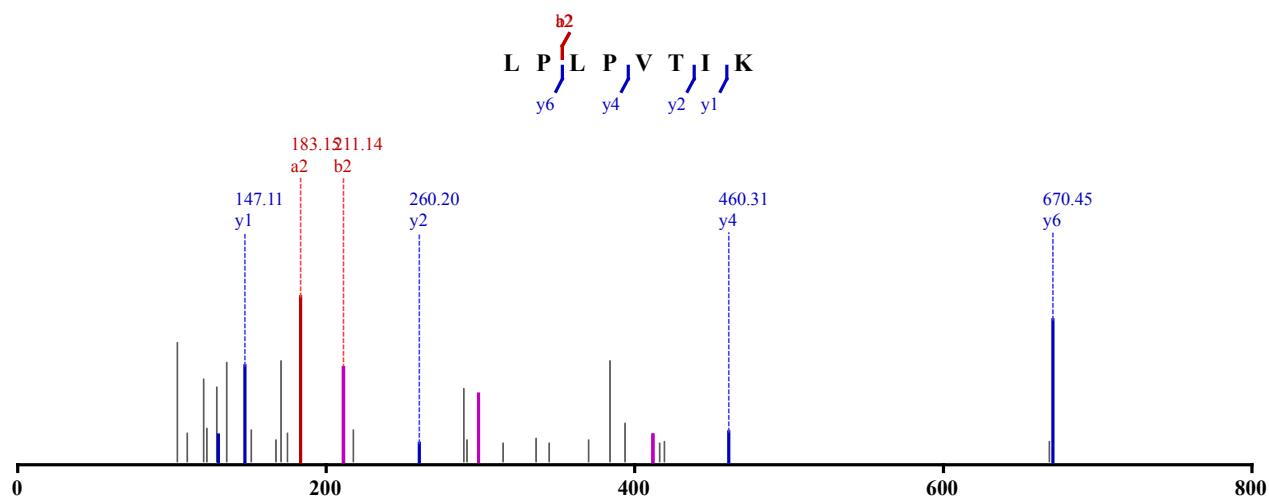

Not Modified

Identified in MSS487 with qvalue 0.00

Charge: 2, Exp. m/z: 440.797, Calc. m/z: 440.797

Data File: HeLa\_ArgC-Try\_pH6\_HCD\_1, Scans: 34834 - 34834

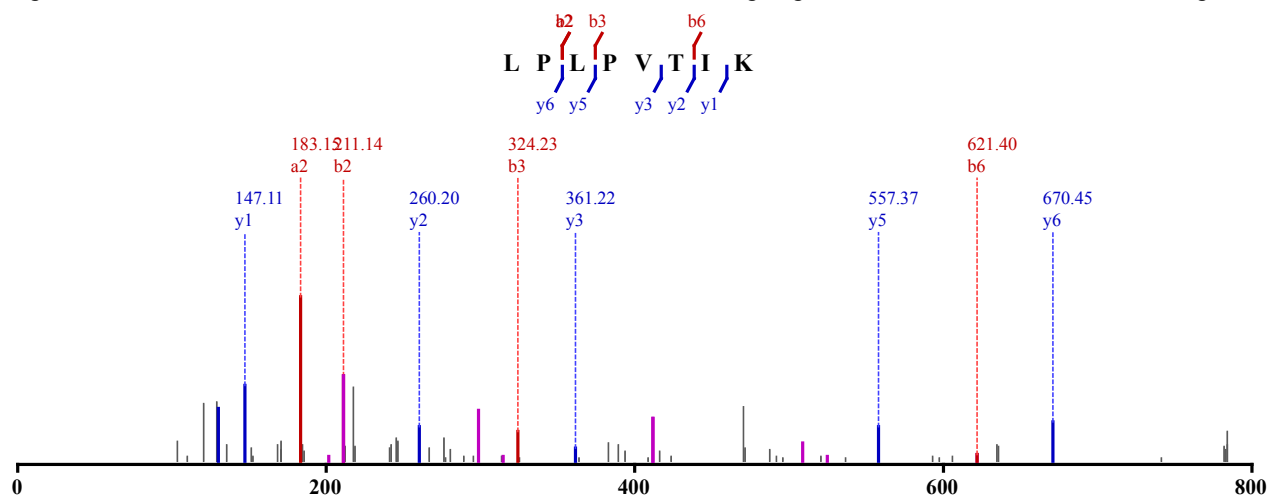

Not Modified

Identified in MSS487 with qvalue 0.00

Charge: 2, Exp. m/z: 440.797, Calc. m/z: 440.797

Data File: HeLa\_ArgC-Try\_pH6\_HCD\_2, Scans: 36067 - 36067

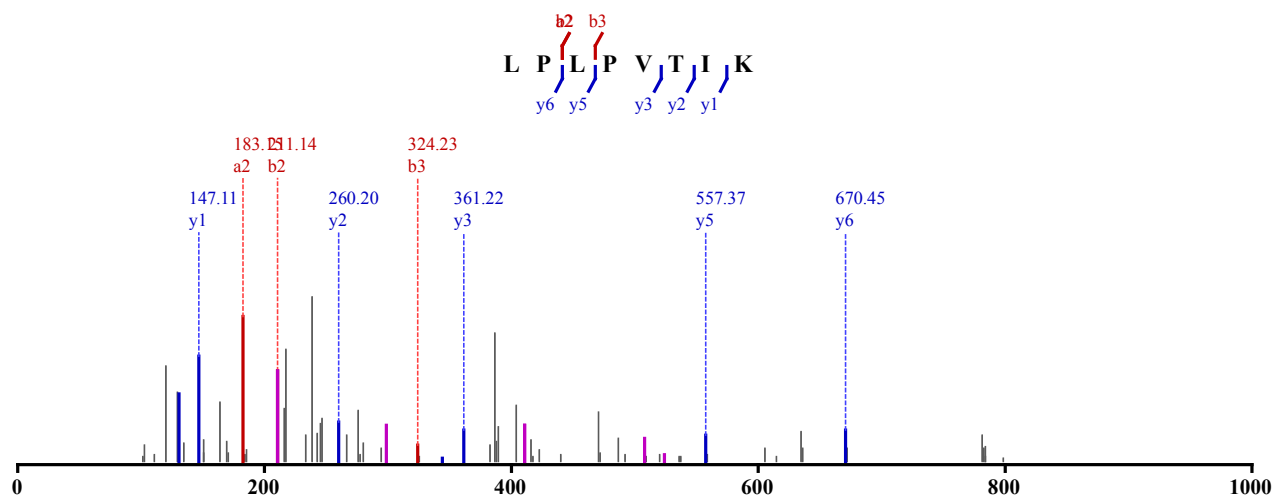

Not Modified

Identified in MSS487 with qvalue 0.00

Charge: 2, Exp. m/z: 440.797, Calc. m/z: 440.797

Data File: HeLa\_ArgC-Try\_pH6\_HCD\_3, Scans: 40826 - 40826

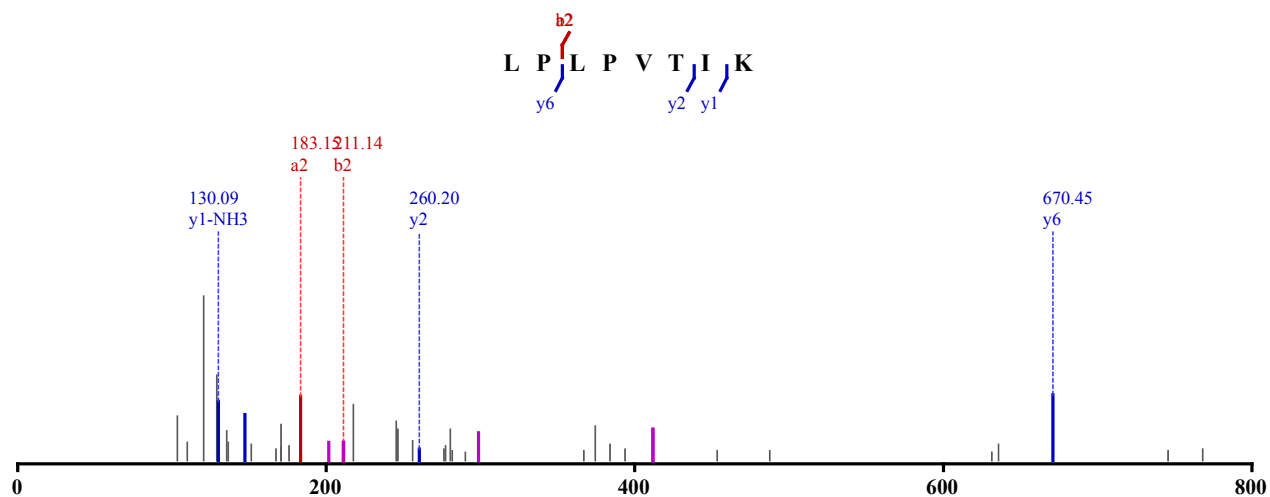

Not Modified

Identified in MSS487 with qvalue 0.00

Charge: 2, Exp. m/z: 440.798, Calc. m/z: 440.797

Data File: HeLa\_ArgC-Try\_pH6\_HCD\_3, Scans: 40710 - 40710

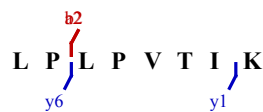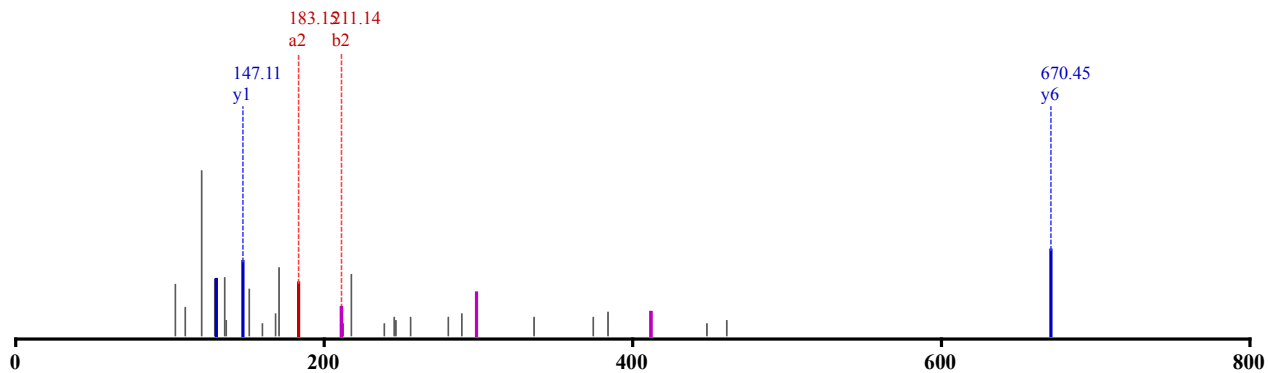

Not Modified

Identified in MSS487 with qvalue 0.00

Charge: 2, Exp. m/z: 440.797, Calc. m/z: 440.797

Data File: HeLa\_ArgC-Try\_pH6\_HCD\_3, Scans: 40767 - 40767

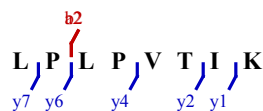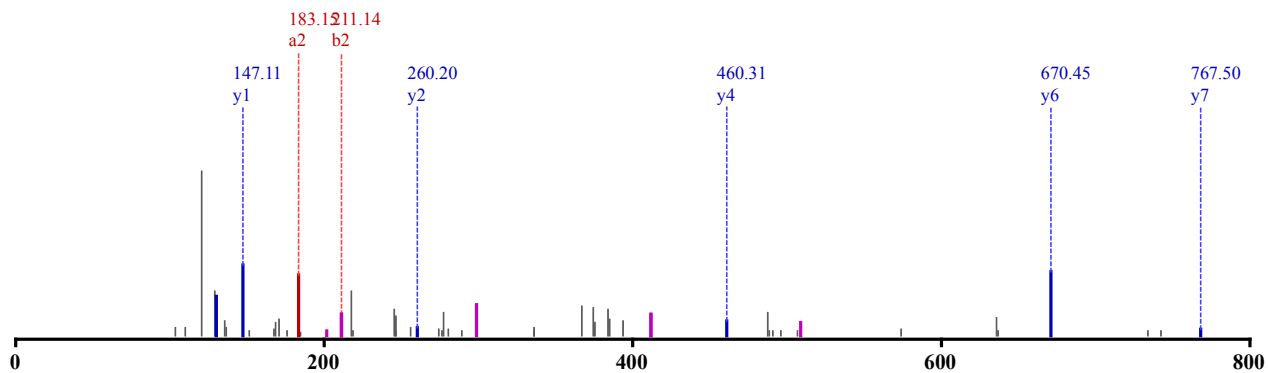

Not Modified

Identified in MSS487 with qvalue 0.00

Charge: 2, Exp. m/z: 440.797, Calc. m/z: 440.797

Data File: HeLa\_ArgC-Try\_pH8\_HCD\_2, Scans: 37020 - 37020

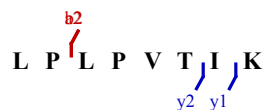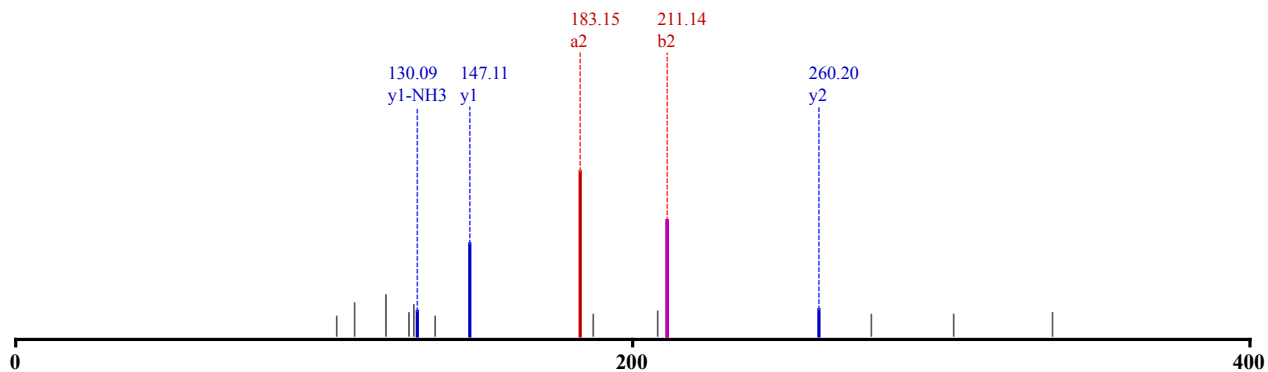

Not Modified

Identified in MSS487 with qvalue 0.01  
 Charge: 2, Exp. m/z: 440.797, Calc. m/z: 440.797  
 Data File: HeLa\_ArgC-Try\_pH5\_HCD\_1, Scans: 35173 - 35173

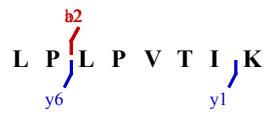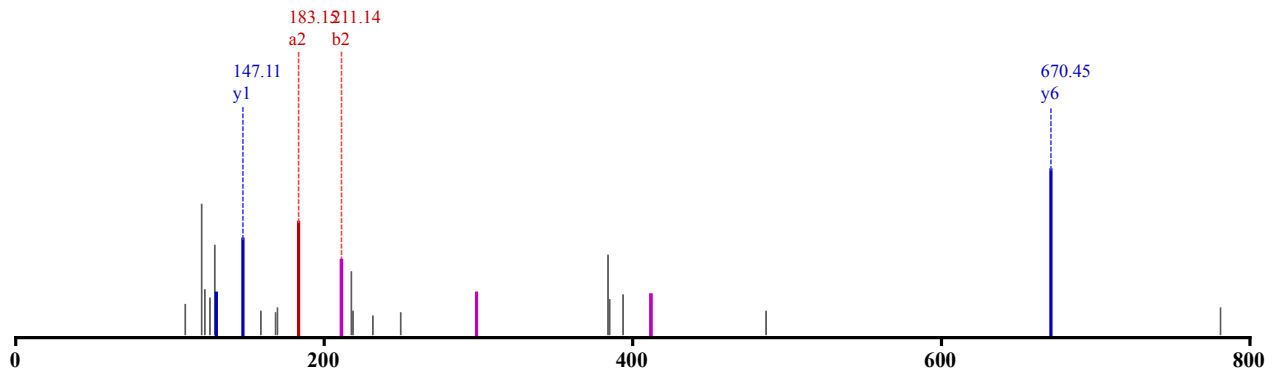

Not Modified  
 Identified in MSS487 with qvalue 0.00  
 Charge: 2, Exp. m/z: 440.797, Calc. m/z: 440.797  
 Data File: HeLa\_ArgC-Try\_pH5\_HCD\_1, Scans: 35243 - 35243

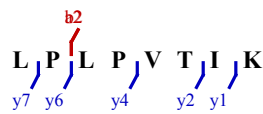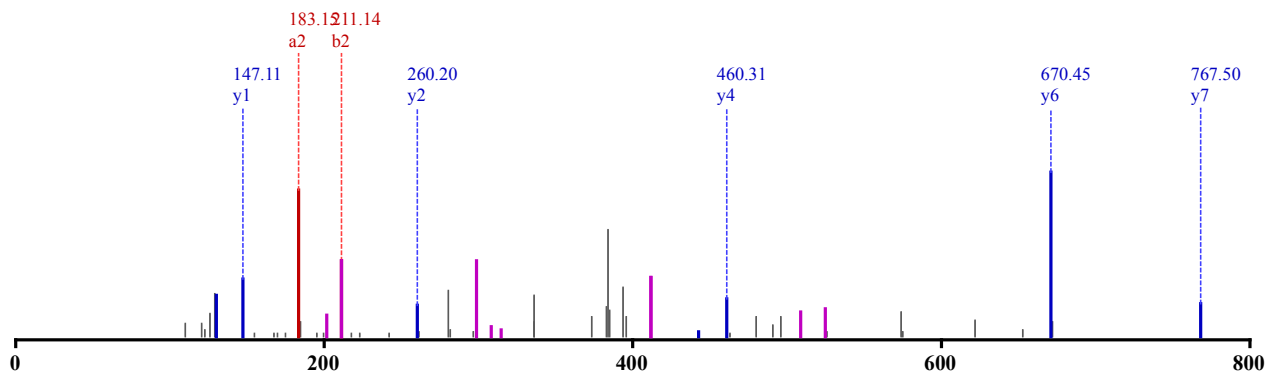

Not Modified  
 Identified in MSS487 with qvalue 0.00  
 Charge: 2, Exp. m/z: 440.797, Calc. m/z: 440.797  
 Data File: HeLa\_ArgC-Try\_pH5\_HCD\_2, Scans: 38086 - 38086

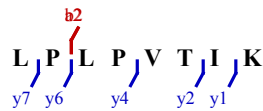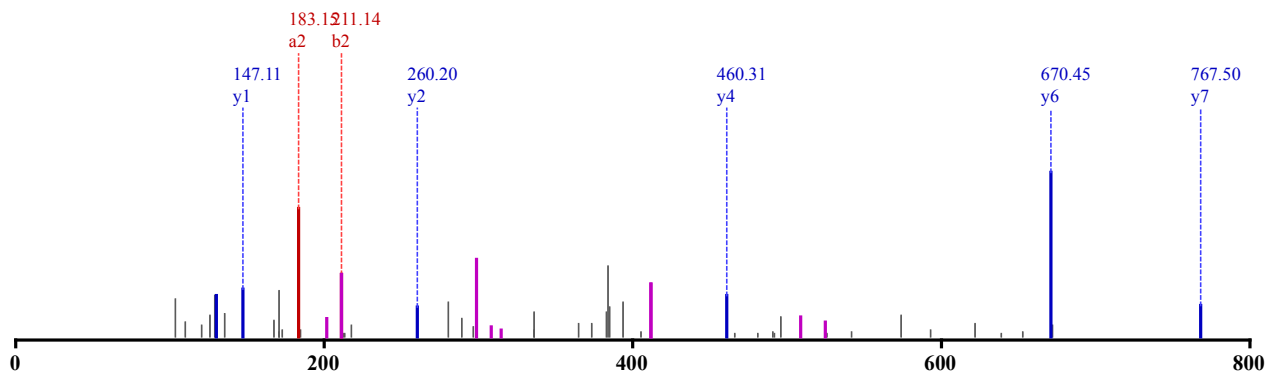

Not Modified

Identified in MSS487 with qvalue 0.00

Charge: 2, Exp. m/z: 440.797, Calc. m/z: 440.797

Data File: HeLa\_ArgC-Try\_pH5\_HCD\_2, Scans: 38151 - 38151

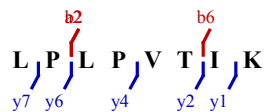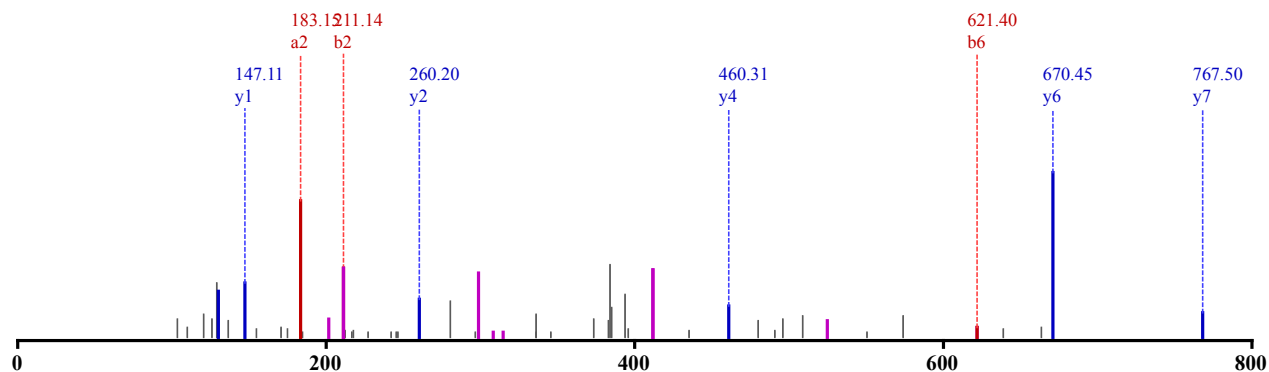

Not Modified

Identified in MSS480 with qvalue 0.00

Charge: 2, Exp. m/z: 716.822, Calc. m/z: 716.822

Data File: HeLa\_try\_pH3\_CID\_3xload, Scans: 13173 - 13173

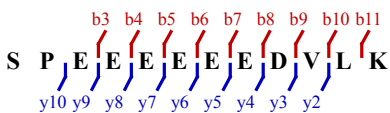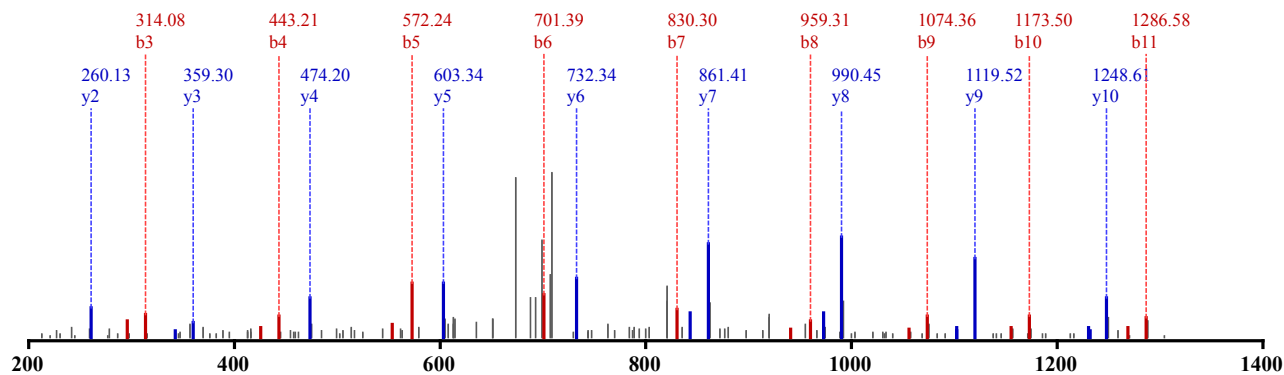

Not Modified

Identified in MSS484 with qvalue 0.00

Charge: 2, Exp. m/z: 716.819, Calc. m/z: 716.822

Data File: HeLa\_Try\_pH3\_HCD\_3, Scans: 23071 - 23071

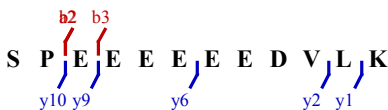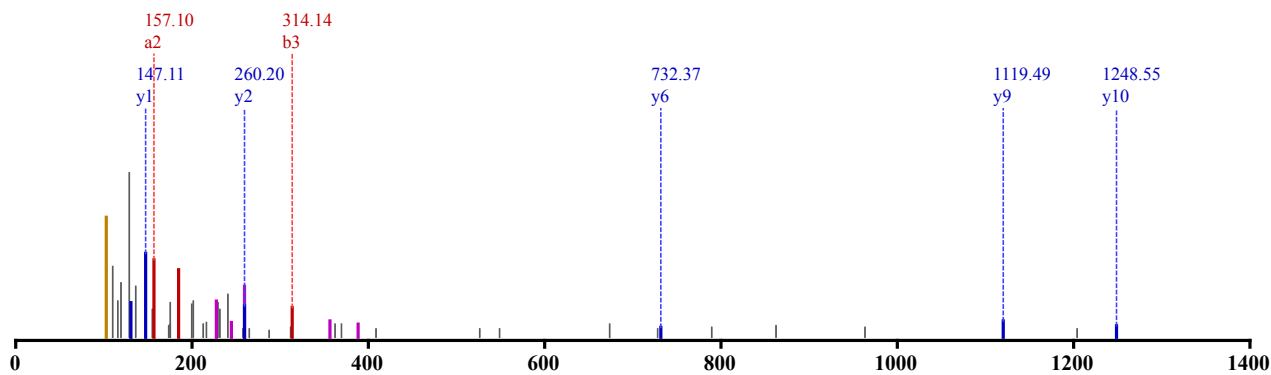

1 x Carbamidomethyl (C)  
 Identified in MSS486 with qvalue 0.00  
 Charge: 7, Exp. m/z: 656.059, Calc. m/z: 655.770  
 Data File: HeLa\_GluC\_80pcACN\_HCD\_1, Scans: 55269 - 55269

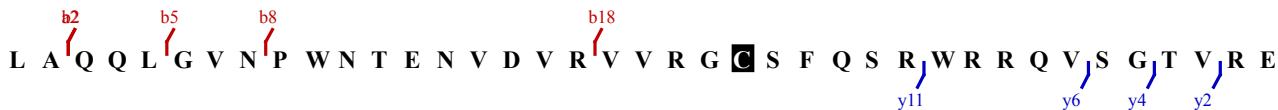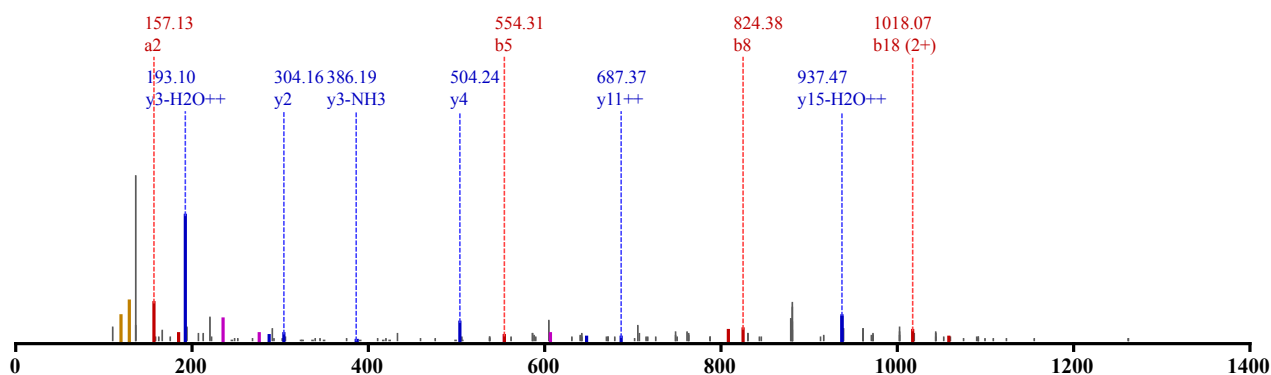

1 x Carbamidomethyl (C)  
 Identified in MSS486 with qvalue 0.00  
 Charge: 7, Exp. m/z: 656.060, Calc. m/z: 655.770  
 Data File: HeLa\_GluC\_80pcACN\_HCD\_1, Scans: 55328 - 55328

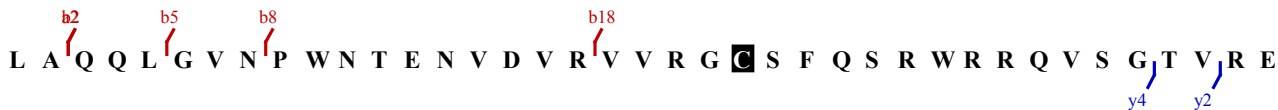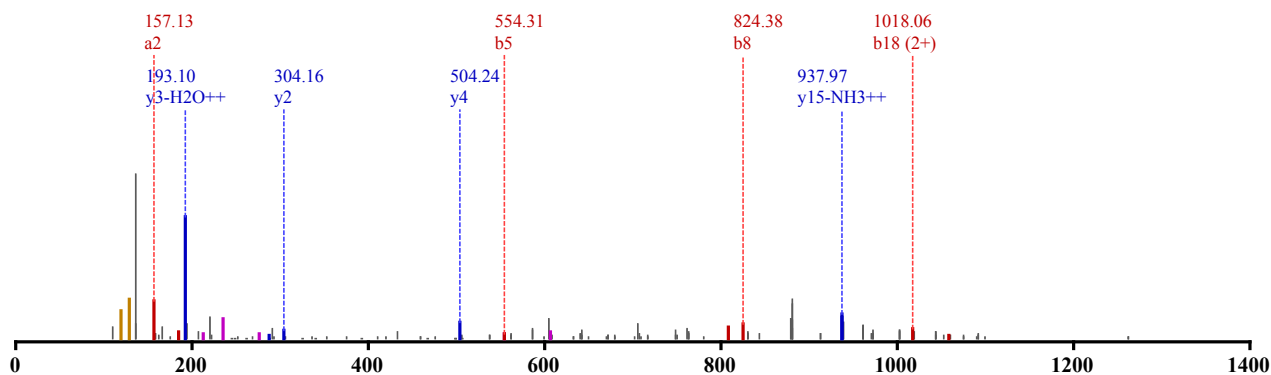

1 x Carbamidomethyl (C)  
 Identified in MSS486 with qvalue 0.00  
 Charge: 7, Exp. m/z: 656.059, Calc. m/z: 655.770



Data File: HeLa\_GluC\_80pcACN\_HCD\_1, Scans: 55393 - 55393

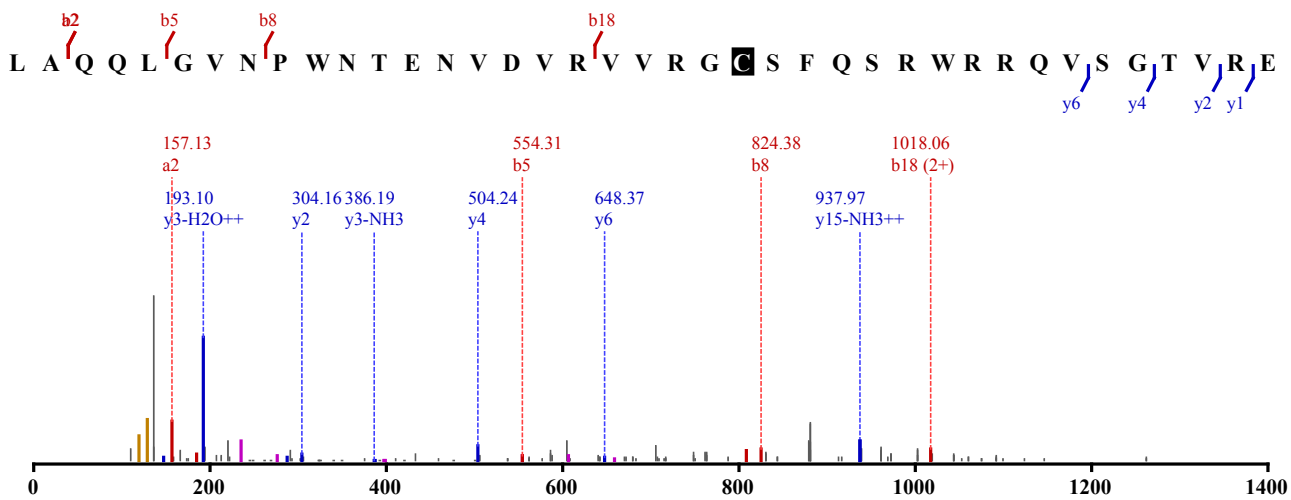

1 x Carbamidomethyl (C)

Identified in MSS486 with qvalue 0.00

Charge: 7, Exp. m/z: 656.060, Calc. m/z: 655.770

Data File: HeLa\_GluC\_80pcACN\_HCD\_2, Scans: 54945 - 54945

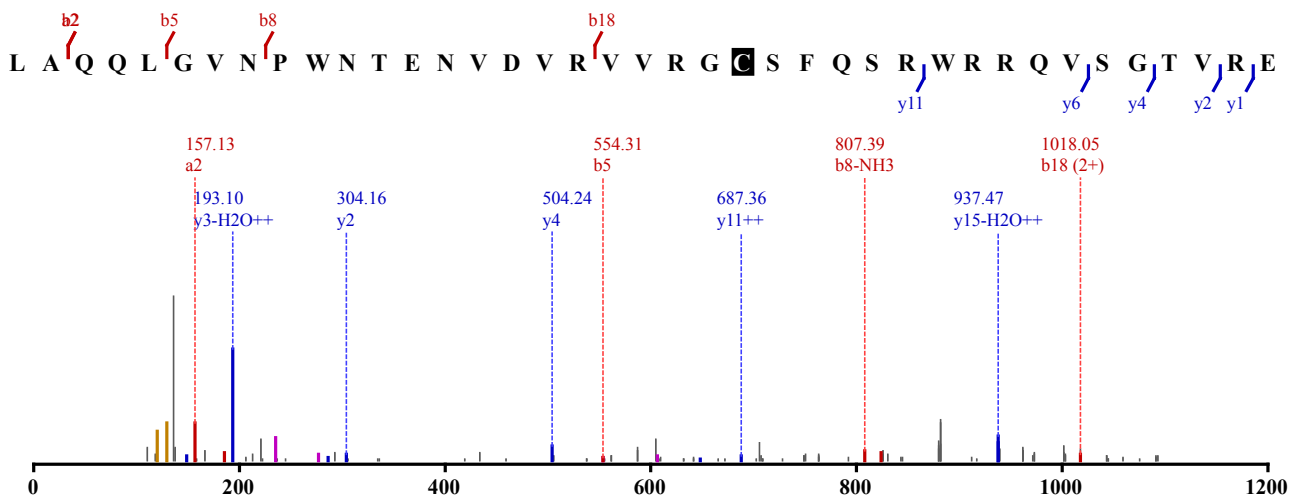

1 x Carbamidomethyl (C)

Identified in MSS486 with qvalue 0.00

Charge: 7, Exp. m/z: 656.059, Calc. m/z: 655.770

Data File: HeLa\_GluC\_80pcACN\_HCD\_2, Scans: 55005 - 55005

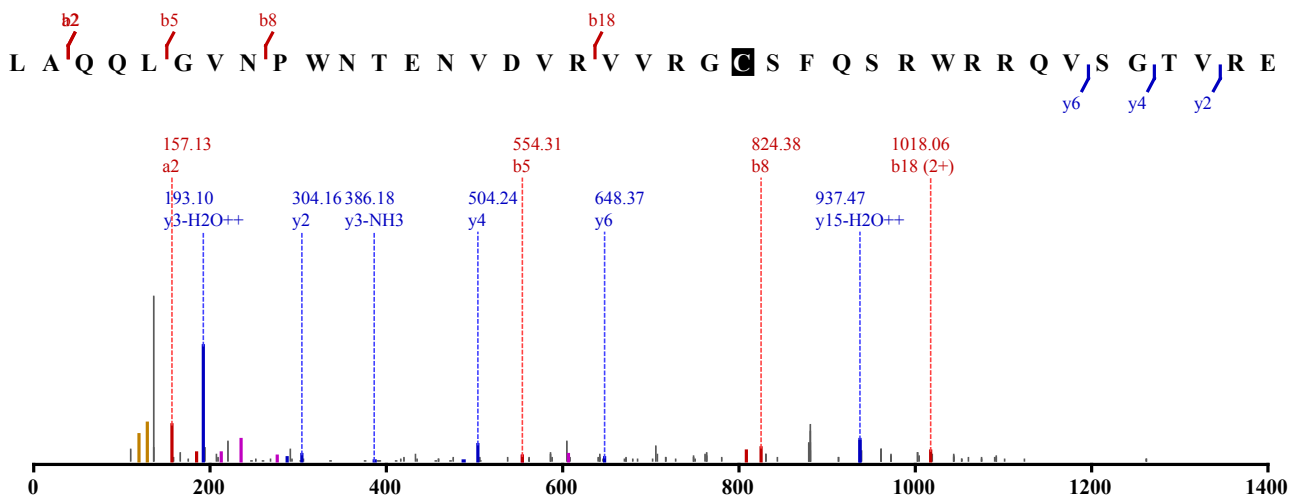

1 x Carbamidomethyl (C)

Identified in MSS486 with qvalue 0.00

Charge: 7, Exp. m/z: 656.059, Calc. m/z: 655.770

Data File: HeLa\_GluC\_80pcACN\_HCD\_2, Scans: 55067 - 55067

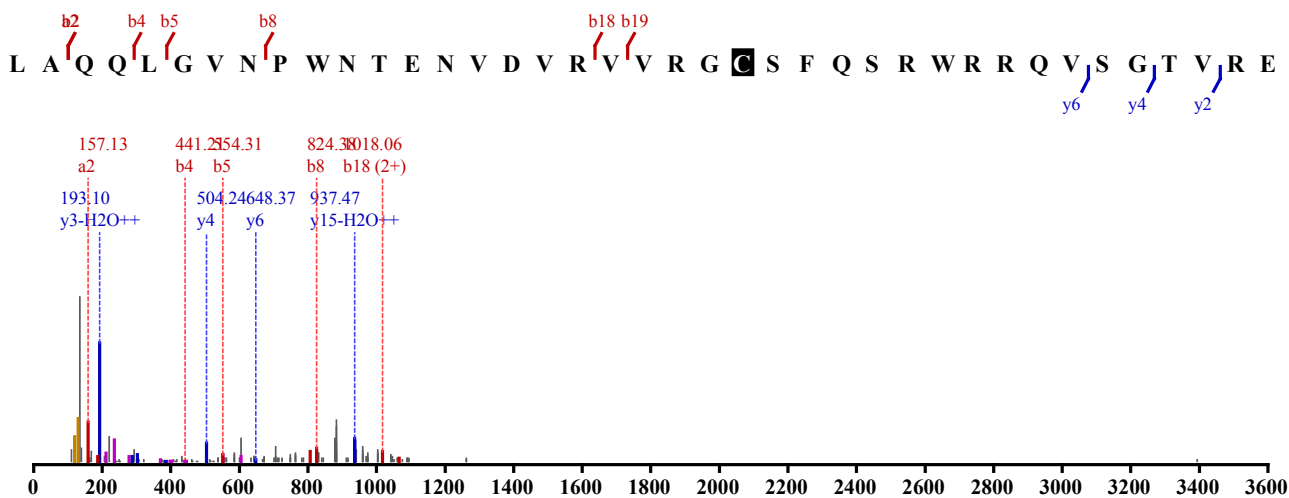

1 x Carbamidomethyl (C)

Identified in MSS486 with qvalue 0.00

Charge: 7, Exp. m/z: 656.059, Calc. m/z: 655.770

Data File: HeLa\_GluC\_80pcACN\_HCD\_2, Scans: 55139 - 55139

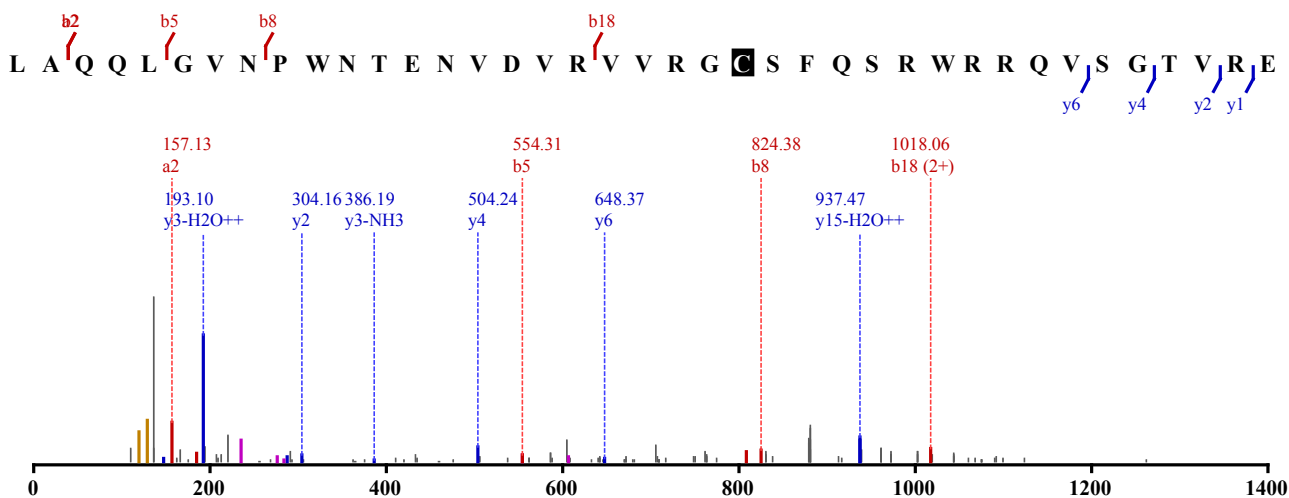

1 x Carbamidomethyl (C)

Identified in MSS486 with qvalue 0.00

Charge: 7, Exp. m/z: 656.060, Calc. m/z: 655.770

Data File: HeLa\_GluC\_80pcACN\_HCD\_3, Scans: 54724 - 54724

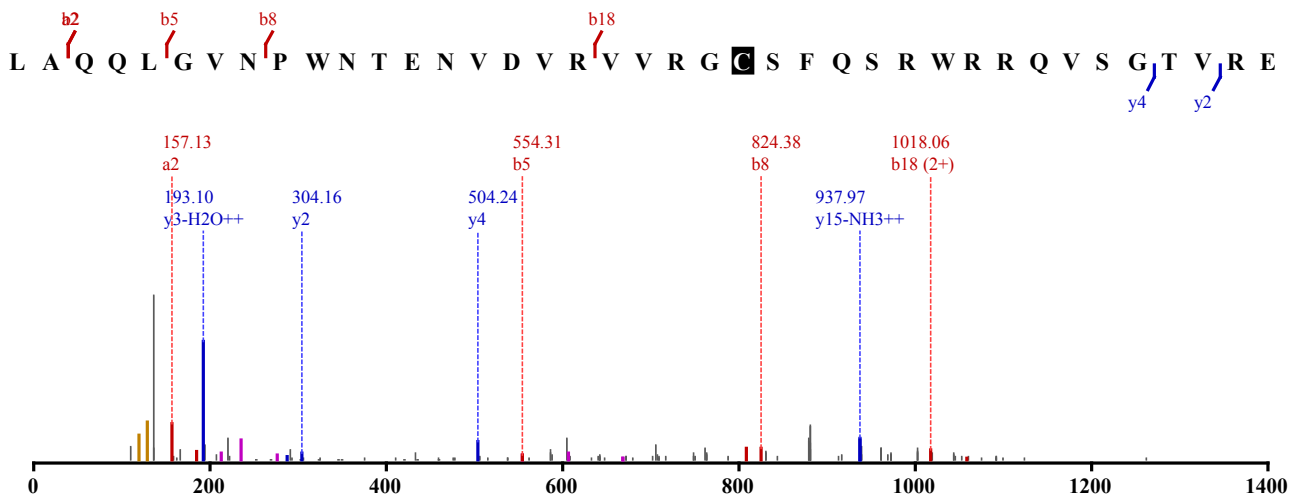

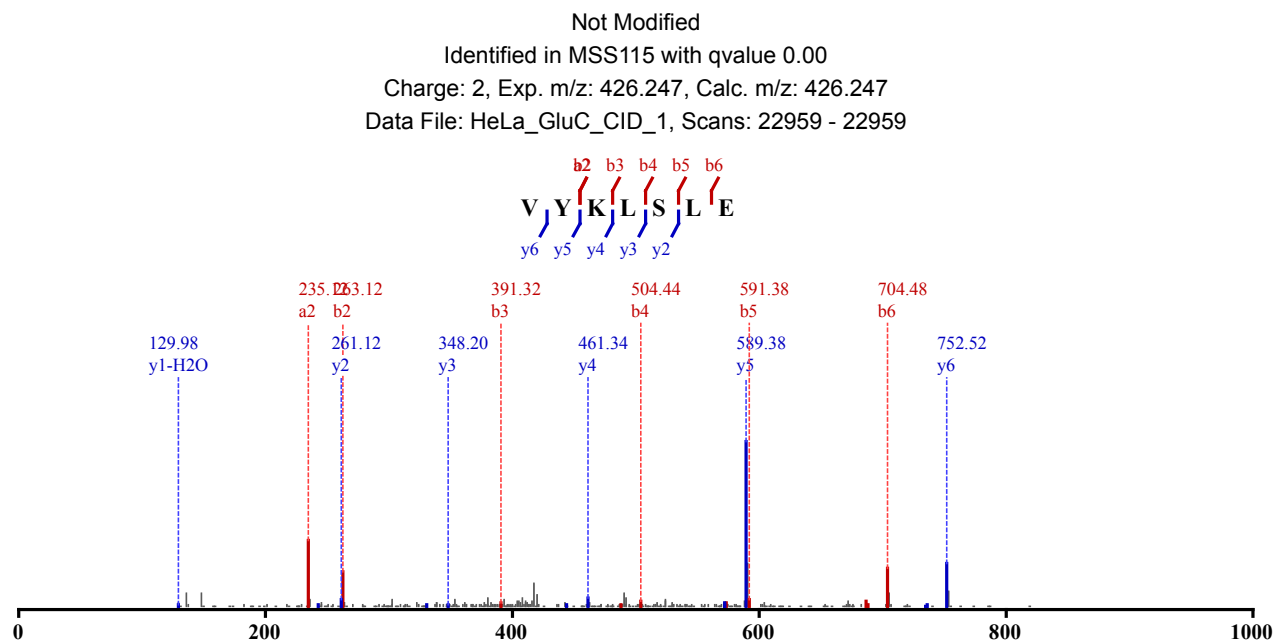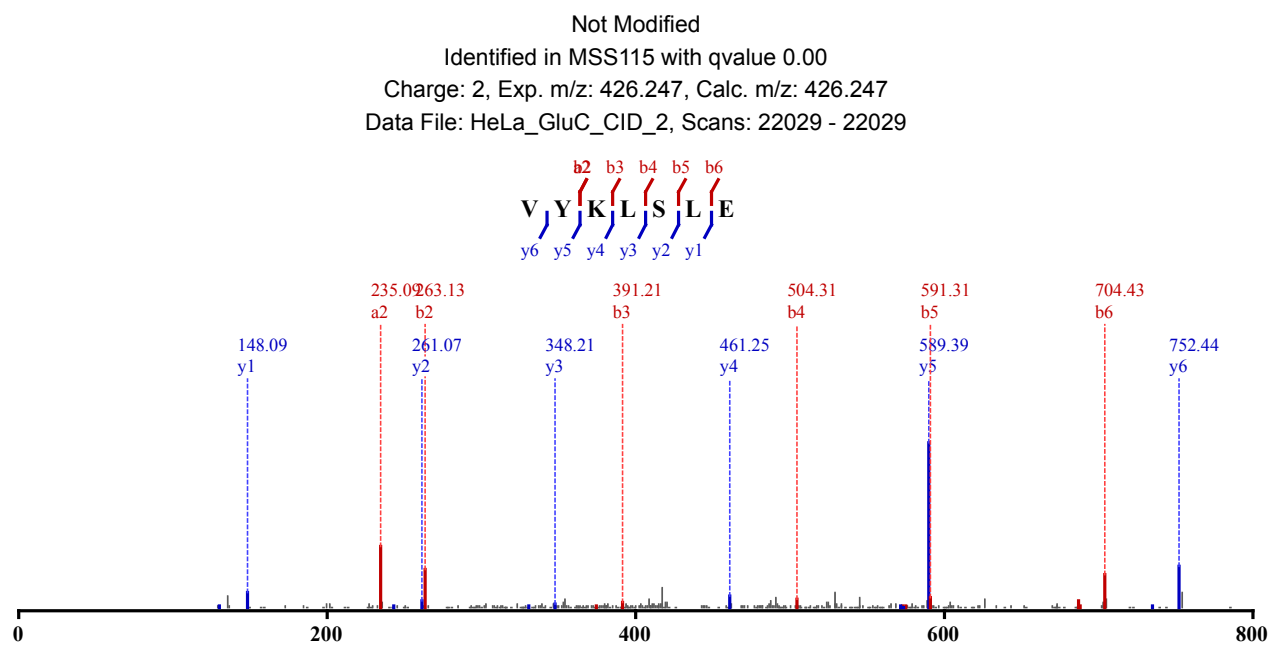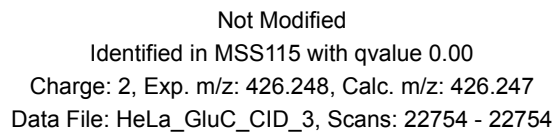

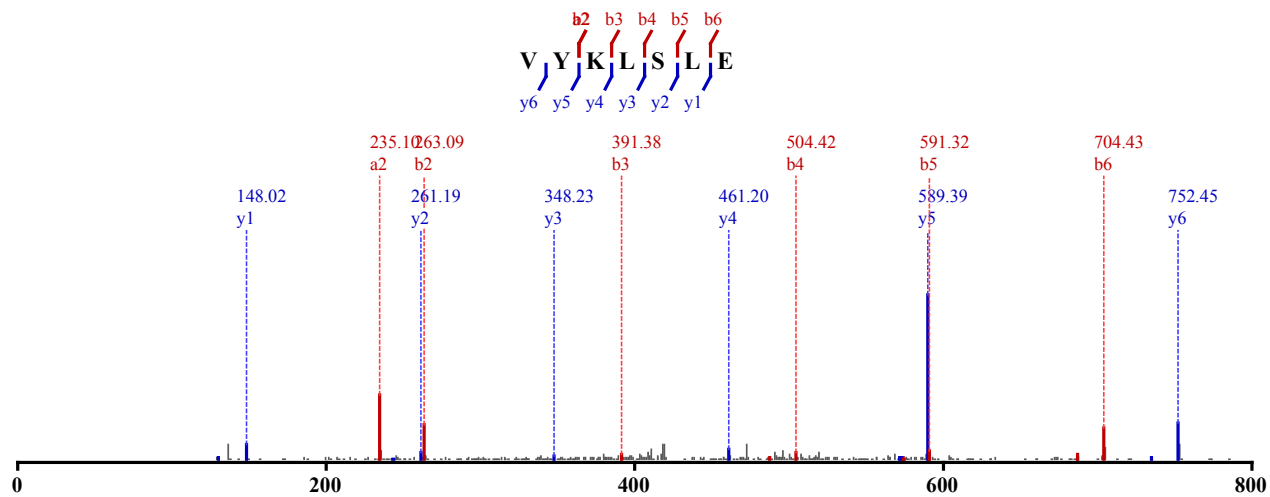

Not Modified

Identified in MSS482 with qvalue 0.00

Charge: 2, Exp. m/z: 426.247, Calc. m/z: 426.247

Data File: HeLa\_GluC\_pH5\_CID\_3xload\_2, Scans: 13898 - 13898

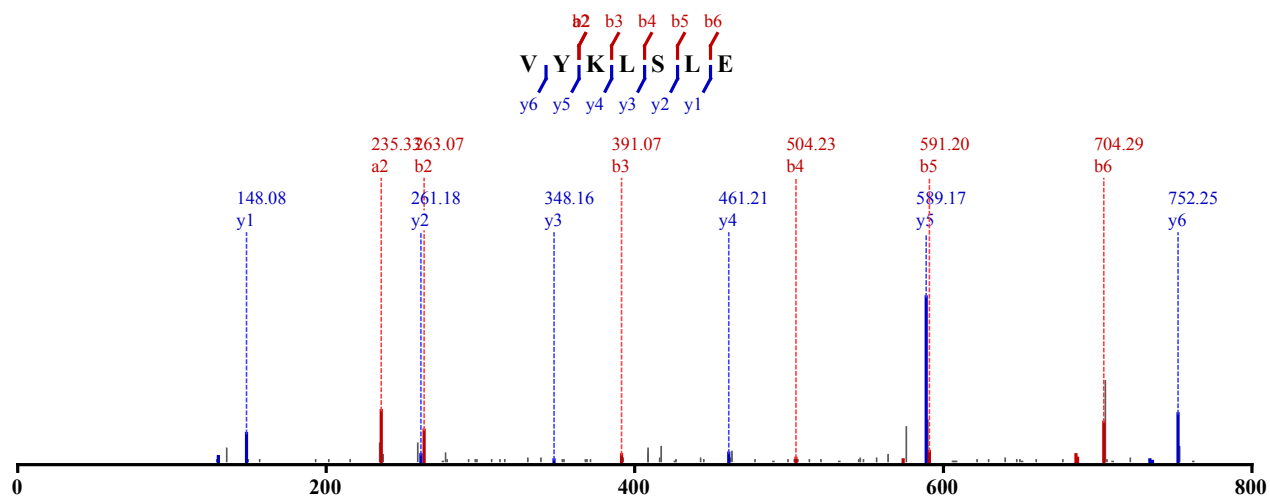

Not Modified

Identified in MSS482 with qvalue 0.00

Charge: 2, Exp. m/z: 426.247, Calc. m/z: 426.247

Data File: HeLa\_GluC\_pH5\_CID\_3xload, Scans: 14049 - 14049

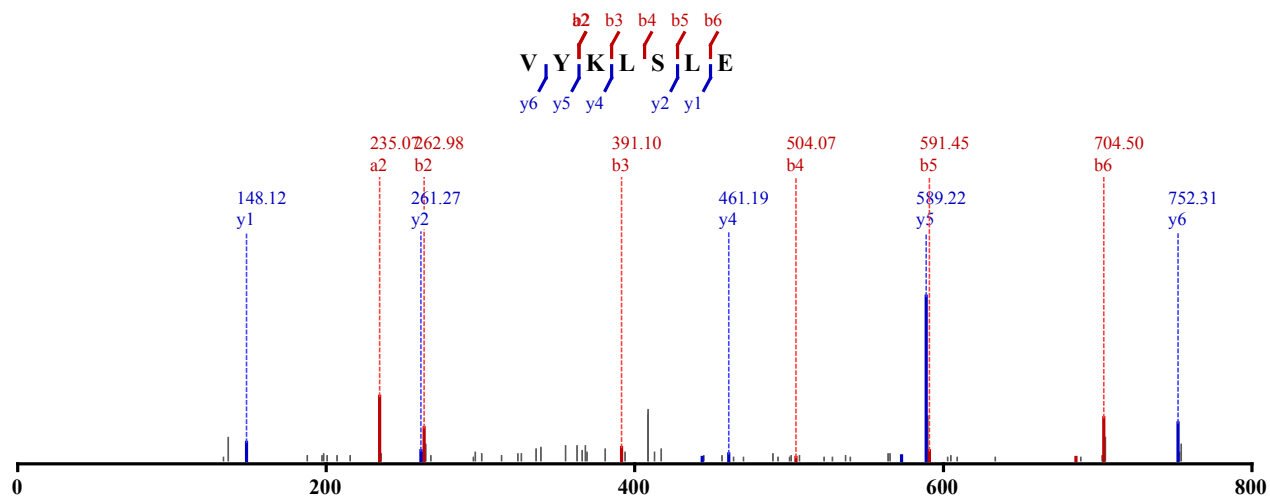

Not Modified

Identified in MSS482 with qvalue 0.00

Charge: 2, Exp. m/z: 426.247, Calc. m/z: 426.247

Data File: HeLa\_GluC\_pH6\_CID\_3xload, Scans: 15829 - 15829

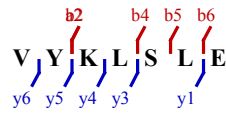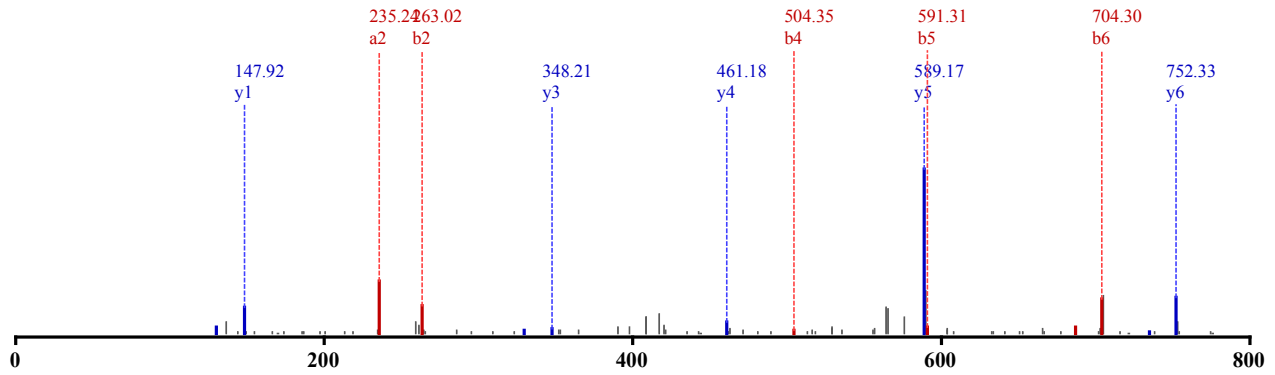

Not Modified

Identified in MSS482 with qvalue 0.01

Charge: 2, Exp. m/z: 426.248, Calc. m/z: 426.247

Data File: HeLa\_GluC\_pH5\_CID\_3xload, Scans: 13916 - 13916

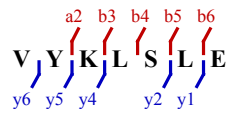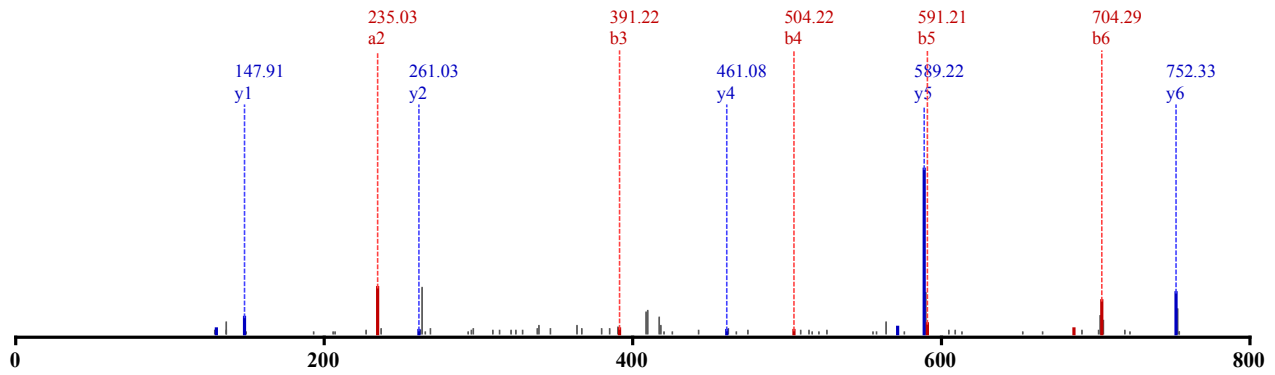

Not Modified

Identified in MSS482 with qvalue 0.00

Charge: 2, Exp. m/z: 426.248, Calc. m/z: 426.247

Data File: HeLa\_GluC\_80pcACN\_CID\_3xload\_2, Scans: 14901 - 14901

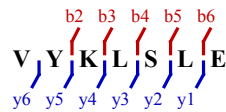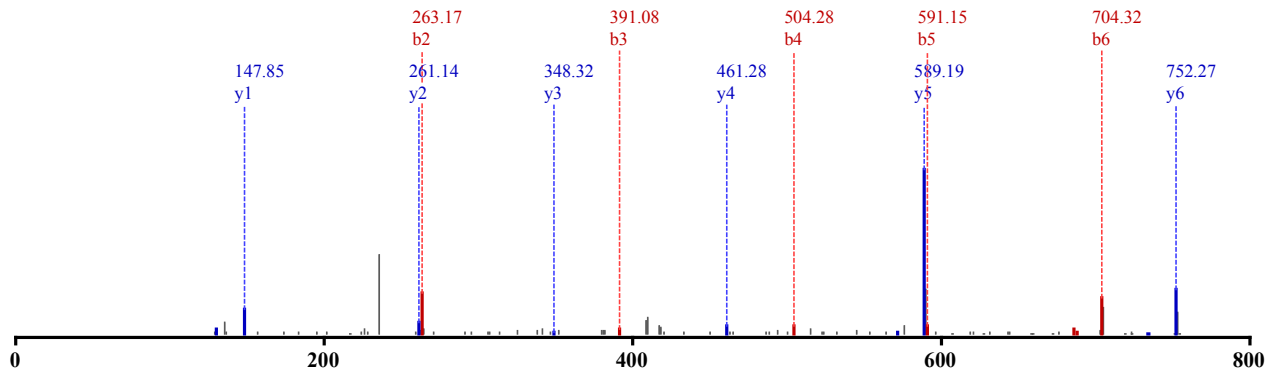

Not Modified

Identified in MSS482 with qvalue 0.00  
 Charge: 2, Exp. m/z: 426.247, Calc. m/z: 426.247  
 Data File: HeLa\_GluC\_pH2\_CID\_3xload\_2, Scans: 12612 - 12612

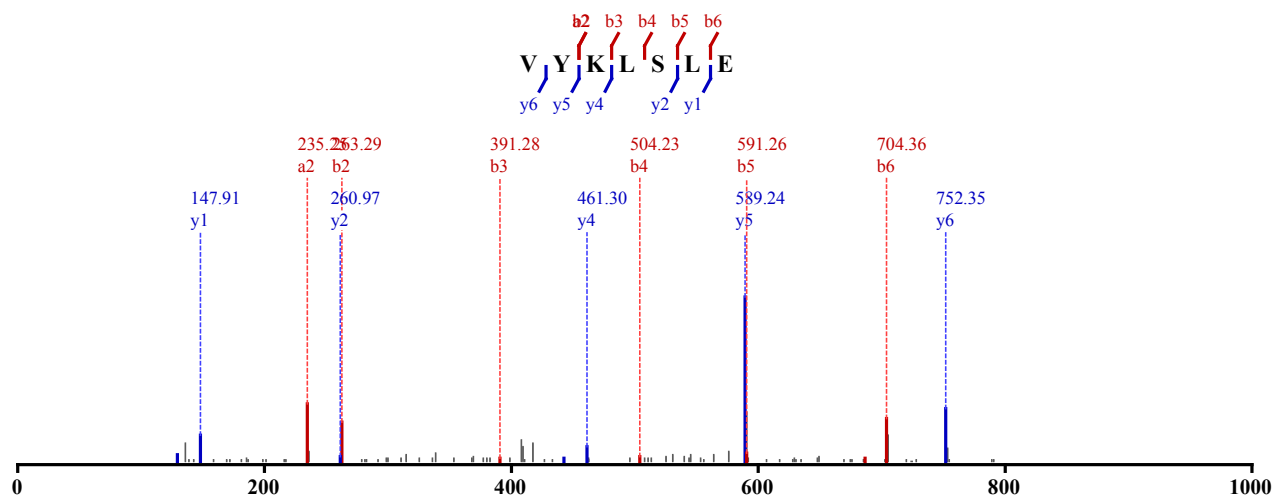

Not Modified  
 Identified in MSS482 with qvalue 0.00  
 Charge: 2, Exp. m/z: 426.247, Calc. m/z: 426.247  
 Data File: HeLa\_GluC\_pH2\_CID\_3xload\_3, Scans: 11902 - 11902

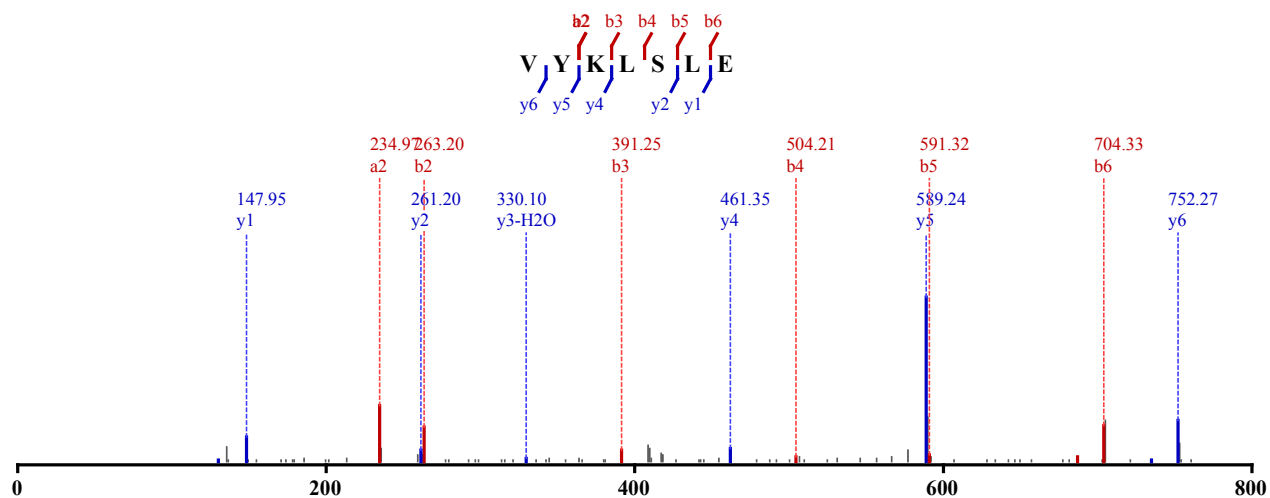

Not Modified  
 Identified in MSS482 with qvalue 0.00  
 Charge: 2, Exp. m/z: 426.247, Calc. m/z: 426.247  
 Data File: HeLa\_GluC\_pH3\_CID\_3xload\_2, Scans: 14450 - 14450

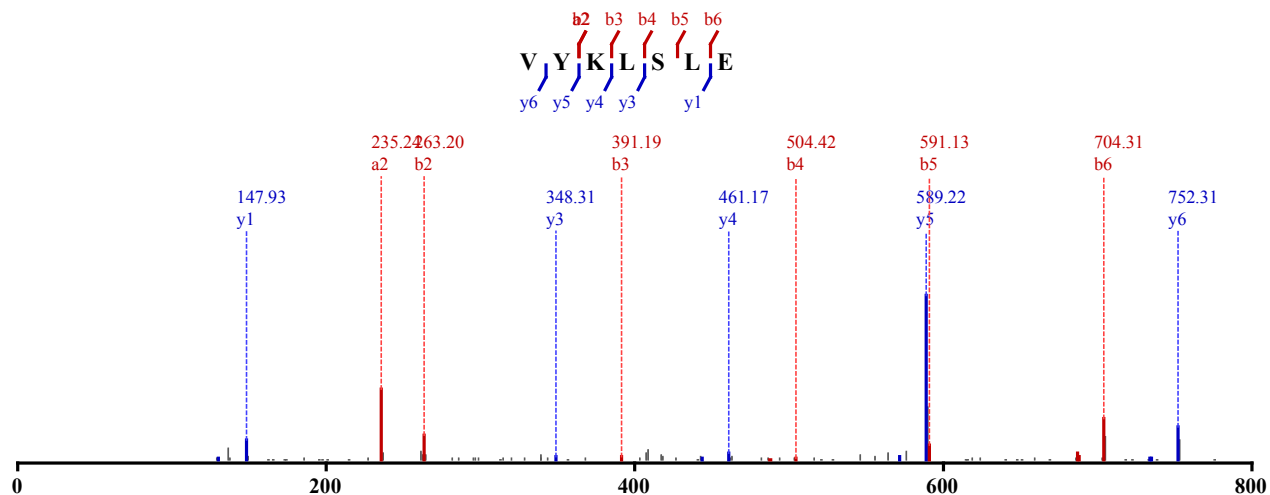

Not Modified  
 Identified in MSS482 with qvalue 0.00  
 Charge: 2, Exp. m/z: 426.247, Calc. m/z: 426.247  
 Data File: HeLa\_GluC\_pH3\_CID\_3xload\_3, Scans: 13792 - 13792

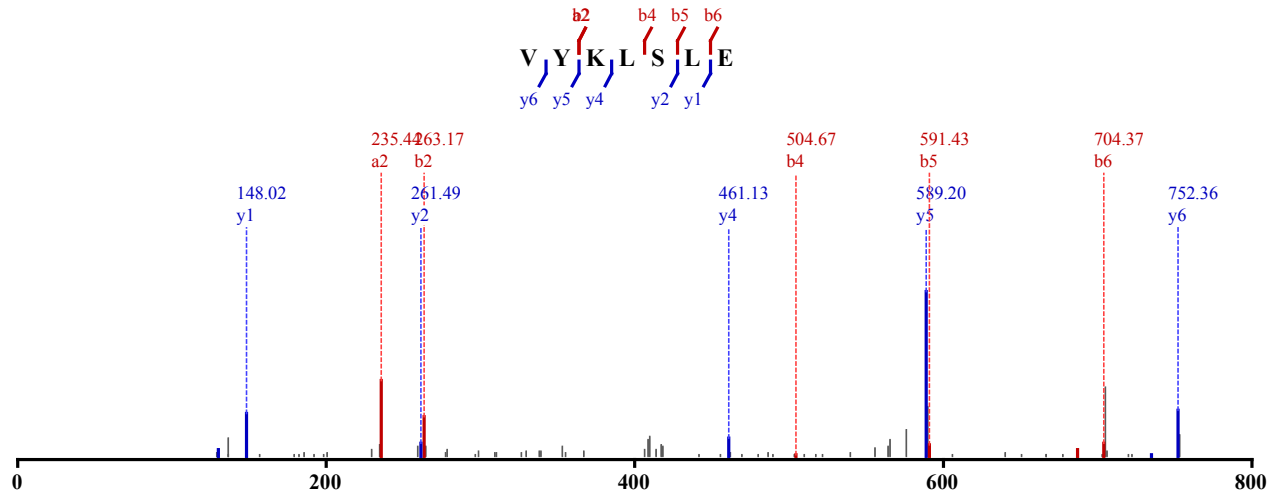

Not Modified  
 Identified in MSS482 with qvalue 0.00  
 Charge: 2, Exp. m/z: 426.247, Calc. m/z: 426.247  
 Data File: HeLa\_GluC\_pH3\_CID\_3xload\_3, Scans: 13855 - 13855

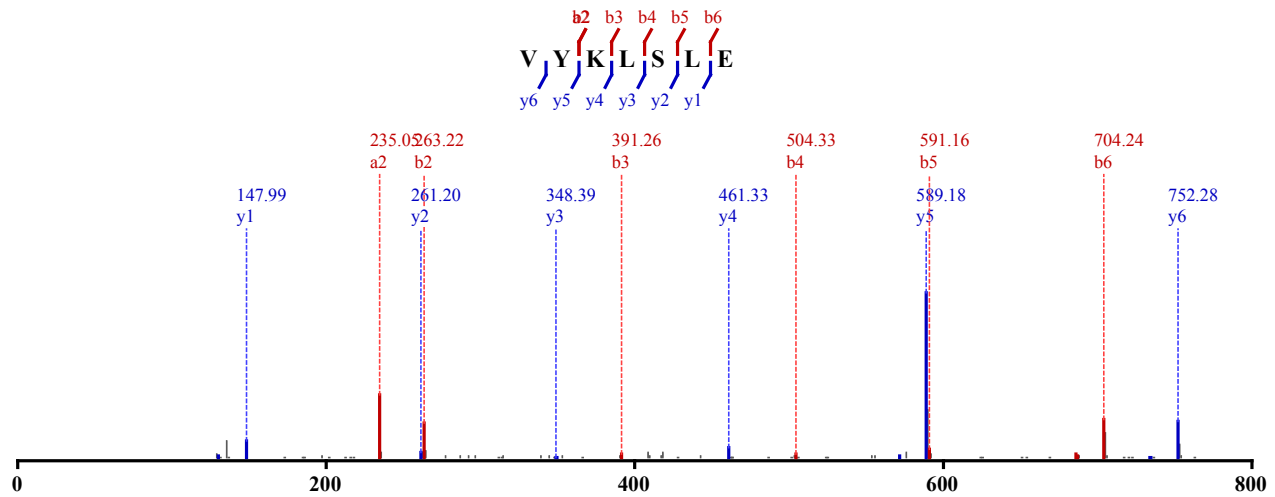

Not Modified  
 Identified in MSS482 with qvalue 0.00  
 Charge: 2, Exp. m/z: 426.247, Calc. m/z: 426.247  
 Data File: HeLa\_GluC\_pH3\_CID\_3xload, Scans: 14120 - 14120

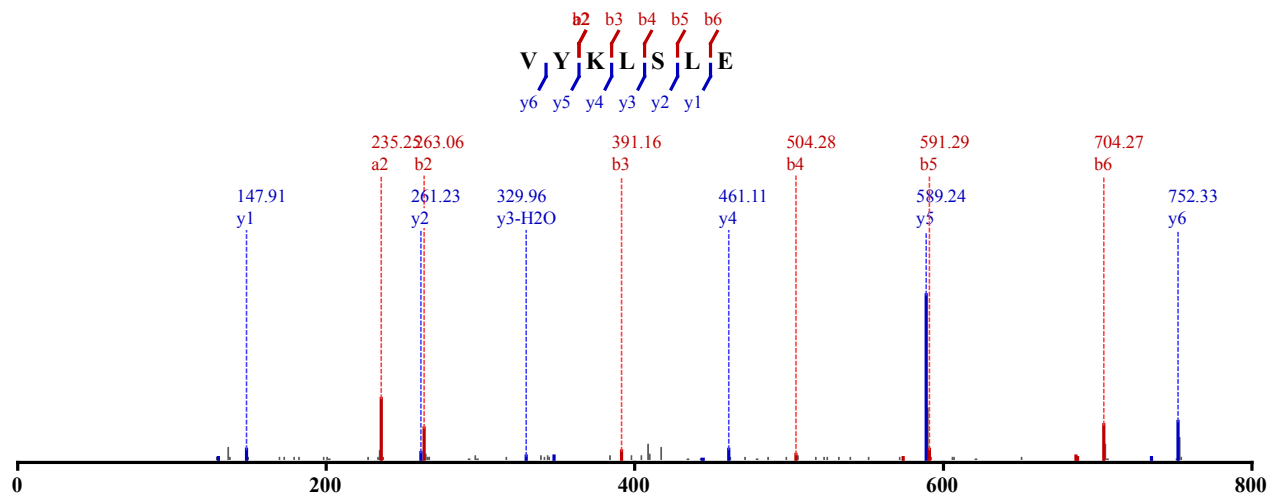

Not Modified  
 Identified in MSS482 with qvalue 0.00  
 Charge: 2, Exp. m/z: 426.247, Calc. m/z: 426.247  
 Data File: HeLa\_GluC\_pH4\_CID\_3xload\_2, Scans: 13737 - 13737

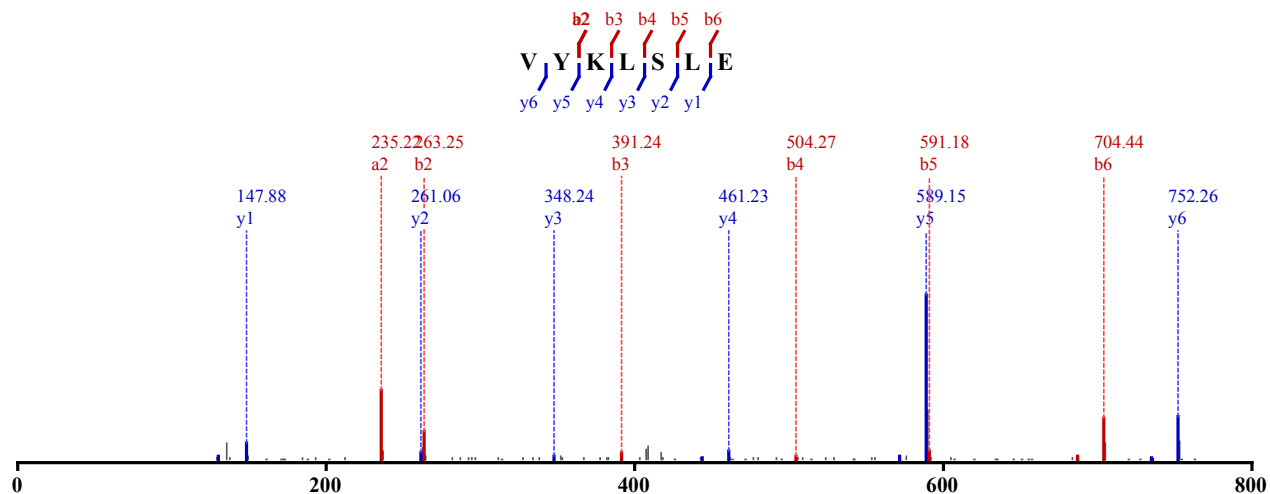

Not Modified  
 Identified in MSS482 with qvalue 0.00  
 Charge: 2, Exp. m/z: 426.247, Calc. m/z: 426.247  
 Data File: HeLa\_GluC\_pH4\_CID\_3xload\_2, Scans: 13806 - 13806

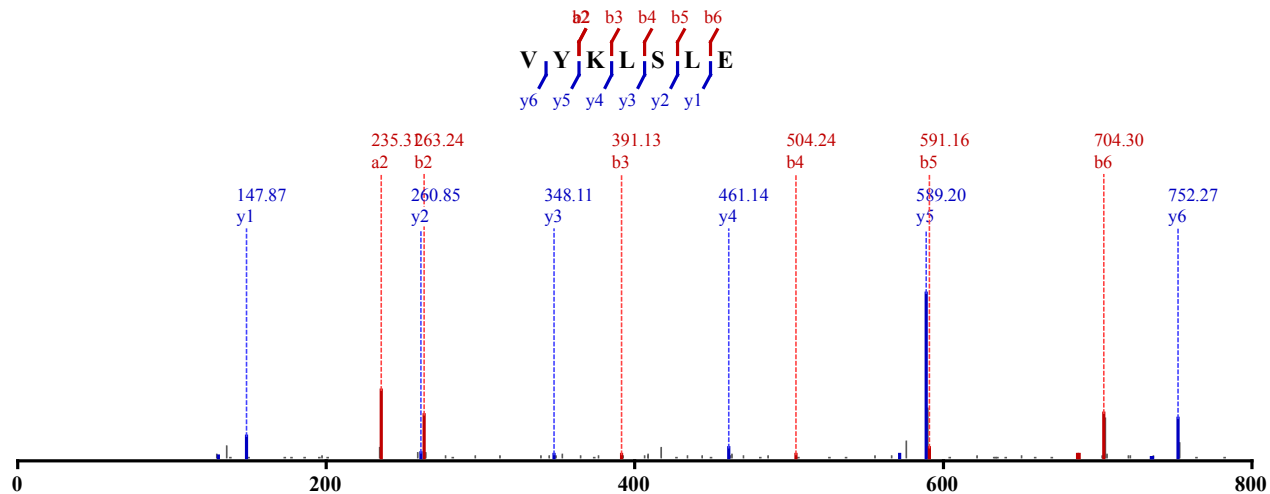

Not Modified  
 Identified in MSS482 with qvalue 0.00  
 Charge: 2, Exp. m/z: 426.247, Calc. m/z: 426.247



Data File: HeLa\_GluC\_pH4\_CID\_3xload\_3, Scans: 13426 - 13426

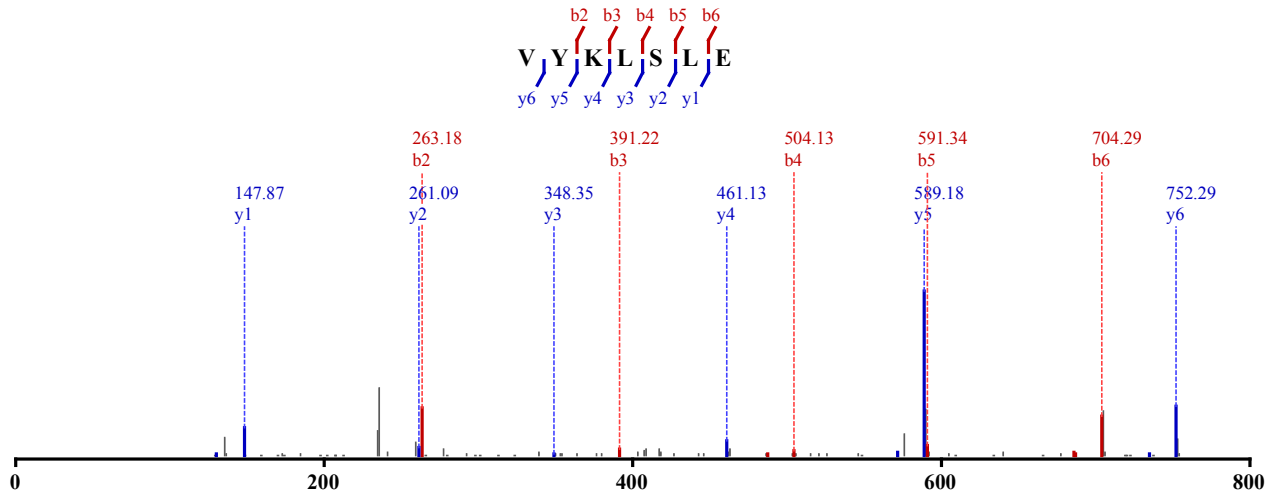

Not Modified

Identified in MSS482 with qvalue 0.00

Charge: 2, Exp. m/z: 426.247, Calc. m/z: 426.247

Data File: HeLa\_GluC\_pH4\_CID\_3xload\_3, Scans: 13496 - 13496

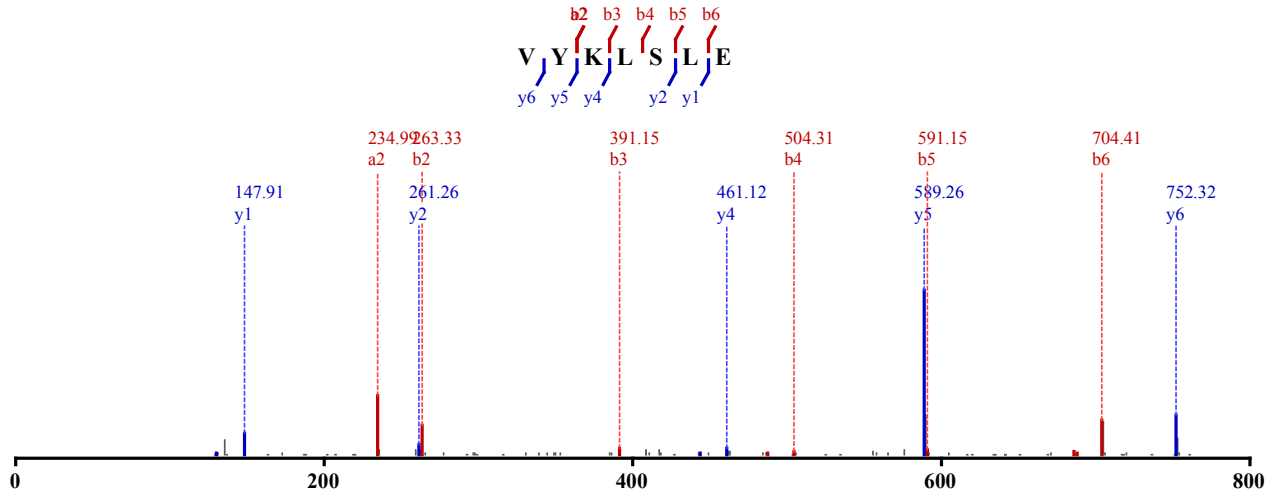

Not Modified

Identified in MSS482 with qvalue 0.00

Charge: 2, Exp. m/z: 426.247, Calc. m/z: 426.247

Data File: HeLa\_GluC\_pH4\_CID\_3xload, Scans: 13765 - 13765

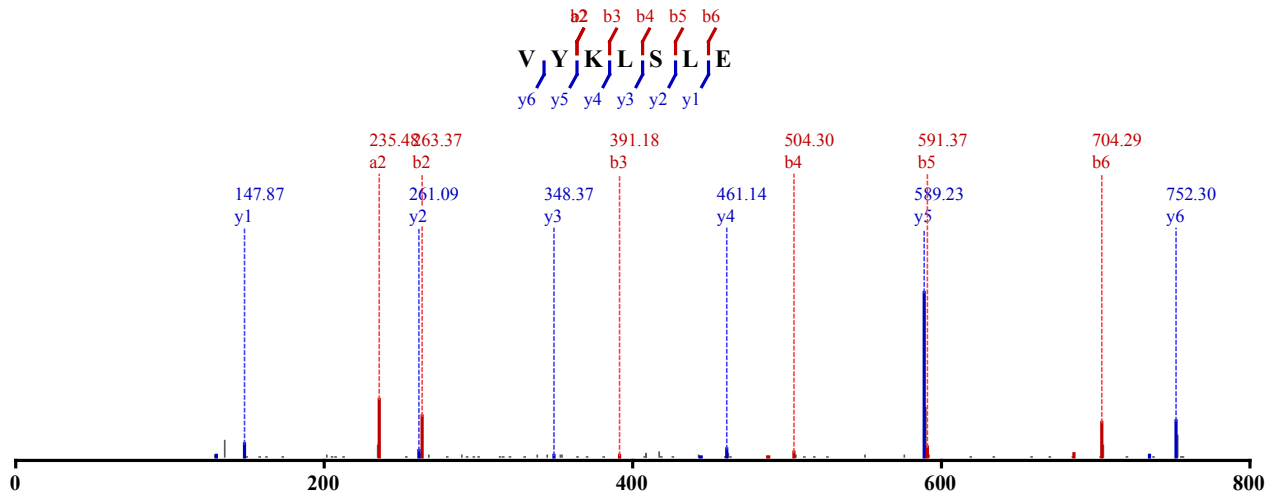

Not Modified

Identified in MSS482 with qvalue 0.00  
 Charge: 2, Exp. m/z: 426.247, Calc. m/z: 426.247  
 Data File: HeLa\_GluC\_pH4\_CID\_3xload, Scans: 13835 - 13835

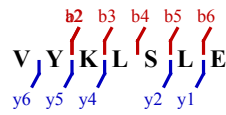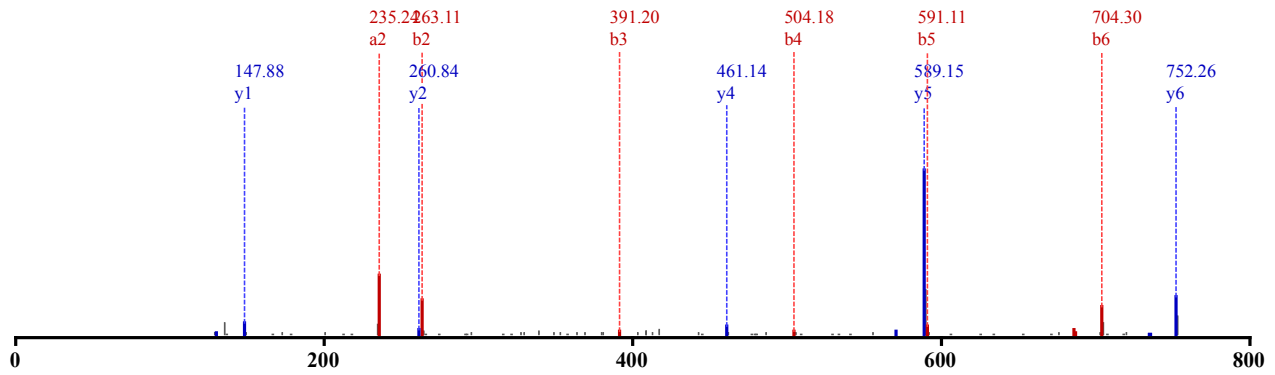

Not Modified  
 Identified in MSS482 with qvalue 0.00  
 Charge: 2, Exp. m/z: 426.247, Calc. m/z: 426.247  
 Data File: HeLa\_GluC\_pH5\_CID\_3xload, Scans: 13976 - 13976

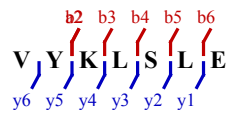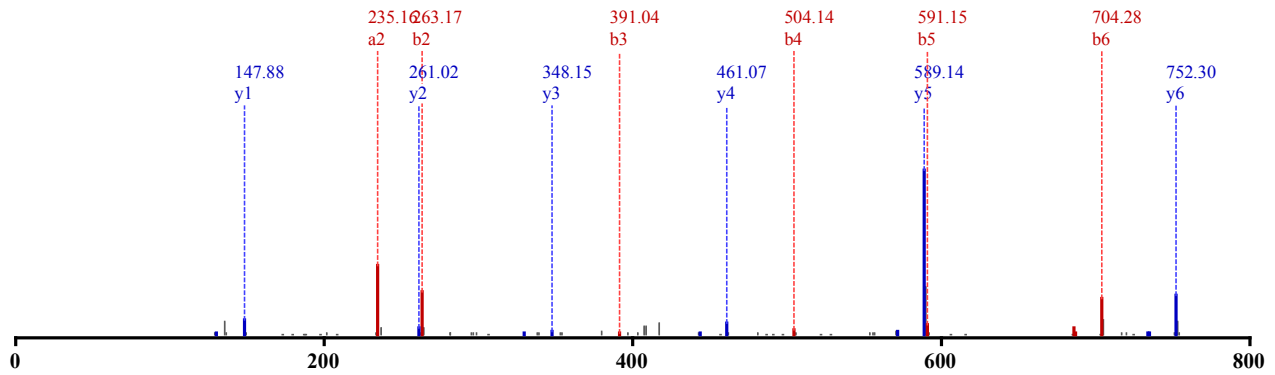

Not Modified  
 Identified in MSS482 with qvalue 0.00  
 Charge: 2, Exp. m/z: 426.247, Calc. m/z: 426.247  
 Data File: HeLa\_GluC\_pH6\_CID\_3xload\_2, Scans: 15482 - 15482

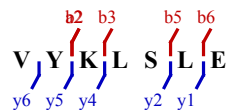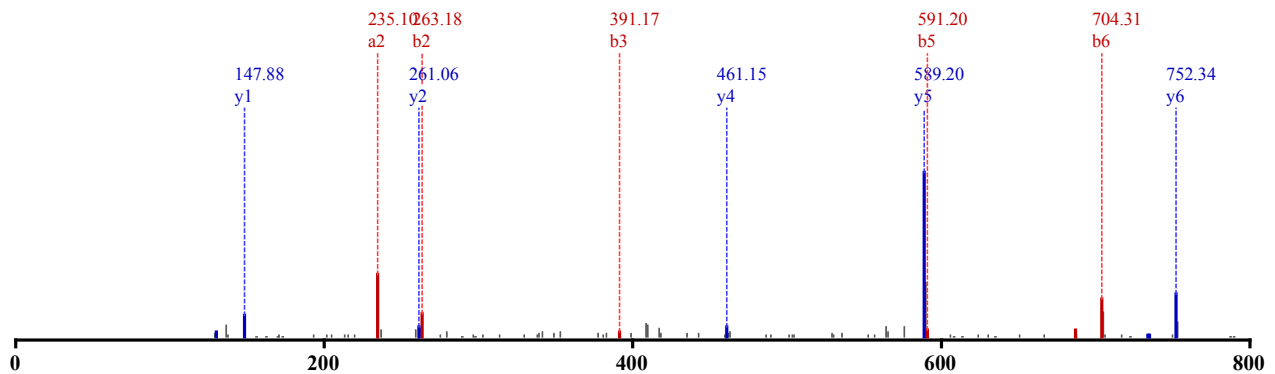

Not Modified

Identified in MSS482 with qvalue 0.00

Charge: 2, Exp. m/z: 426.247, Calc. m/z: 426.247

Data File: HeLa\_GluC\_pH6\_CID\_3xload\_2, Scans: 15556 - 15556

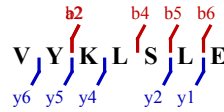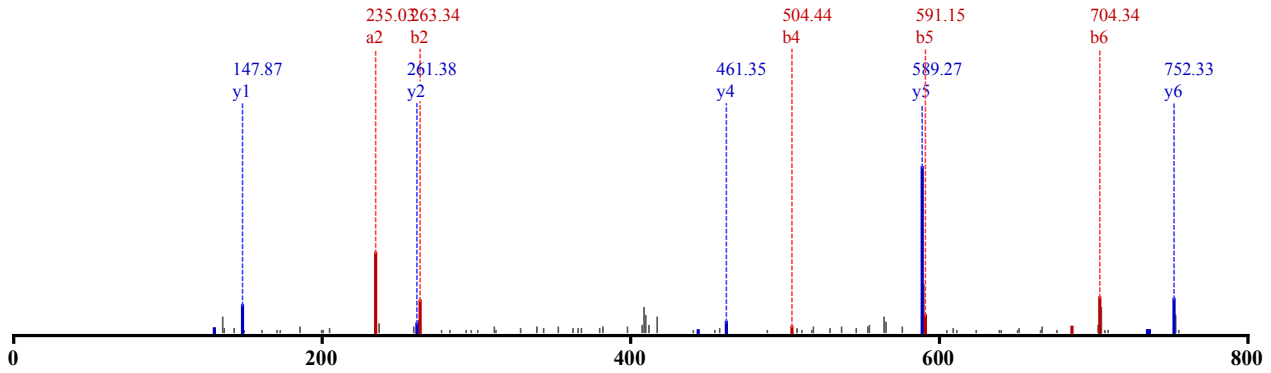

Not Modified

Identified in MSS482 with qvalue 0.00

Charge: 2, Exp. m/z: 426.247, Calc. m/z: 426.247

Data File: HeLa\_GluC\_pH6\_CID\_3xload\_2, Scans: 15340 - 15340

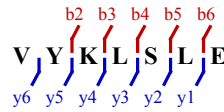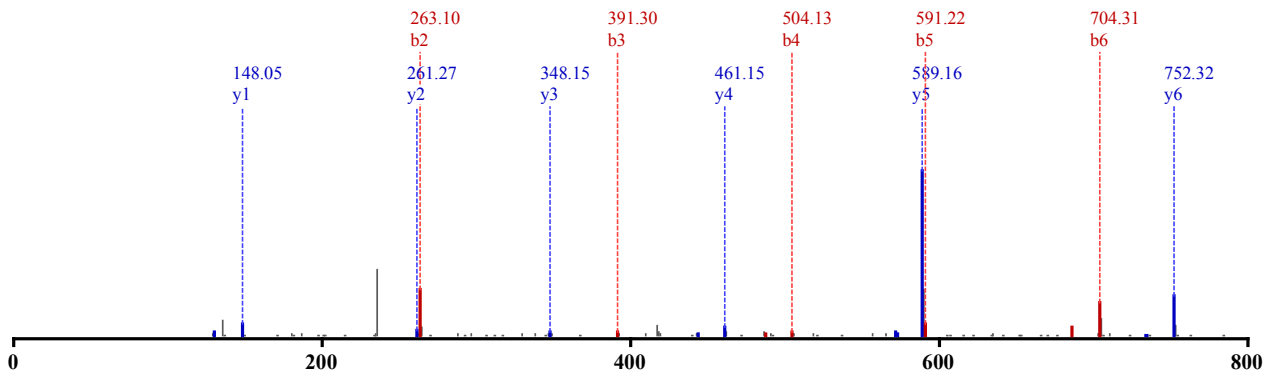

Not Modified

Identified in MSS482 with qvalue 0.00

Charge: 2, Exp. m/z: 426.247, Calc. m/z: 426.247

Data File: HeLa\_GluC\_pH6\_CID\_3xload\_2, Scans: 15410 - 15410

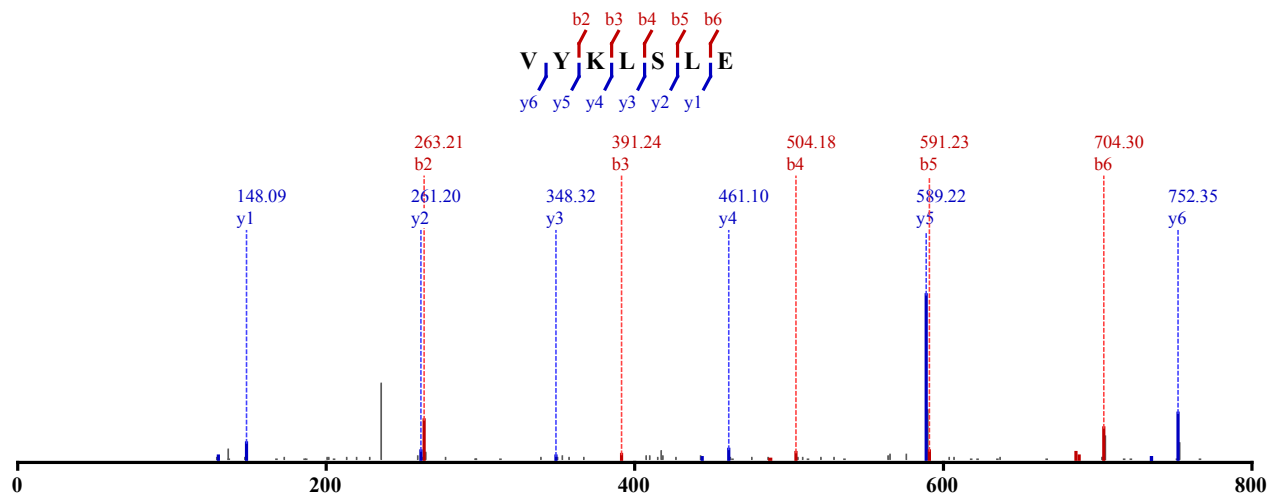

Not Modified  
 Identified in MSS482 with qvalue 0.00  
 Charge: 2, Exp. m/z: 426.247, Calc. m/z: 426.247  
 Data File: HeLa\_GluC\_pH6\_CID\_3xload\_3, Scans: 15241 - 15241

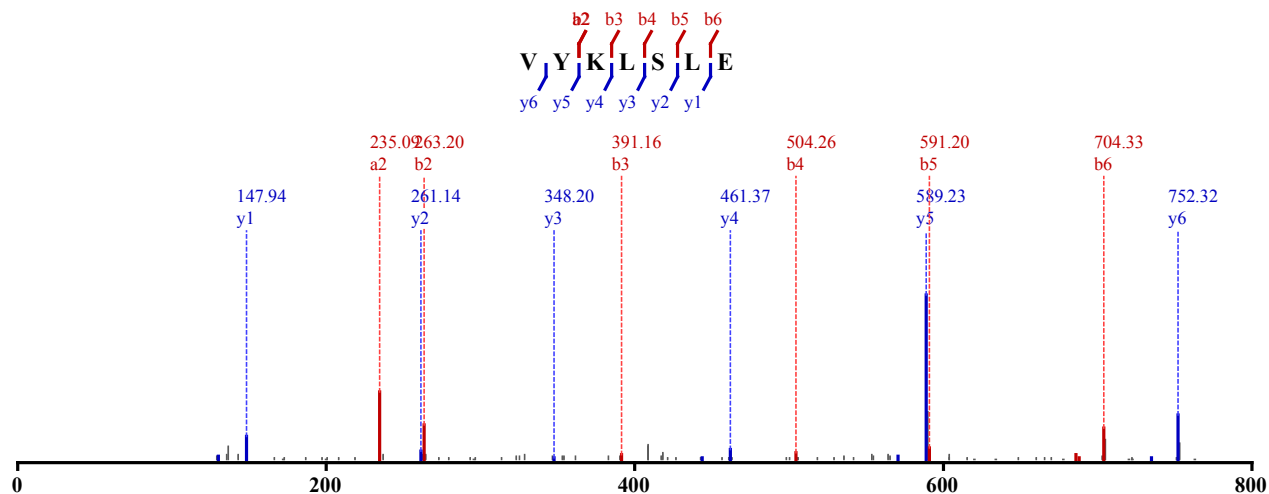

Not Modified  
 Identified in MSS482 with qvalue 0.00  
 Charge: 2, Exp. m/z: 426.247, Calc. m/z: 426.247  
 Data File: HeLa\_GluC\_pH6\_CID\_3xload\_3, Scans: 15314 - 15314

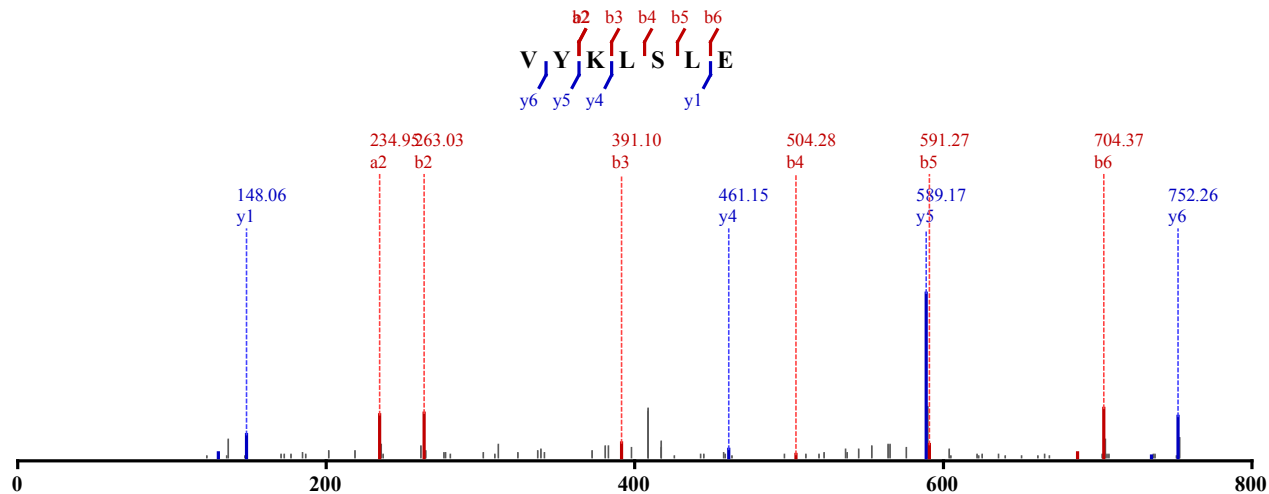

Not Modified  
 Identified in MSS482 with qvalue 0.00  
 Charge: 2, Exp. m/z: 426.247, Calc. m/z: 426.247

Data File: HeLa\_GluC\_pH6\_CID\_3xload\_3, Scans: 15099 - 15099

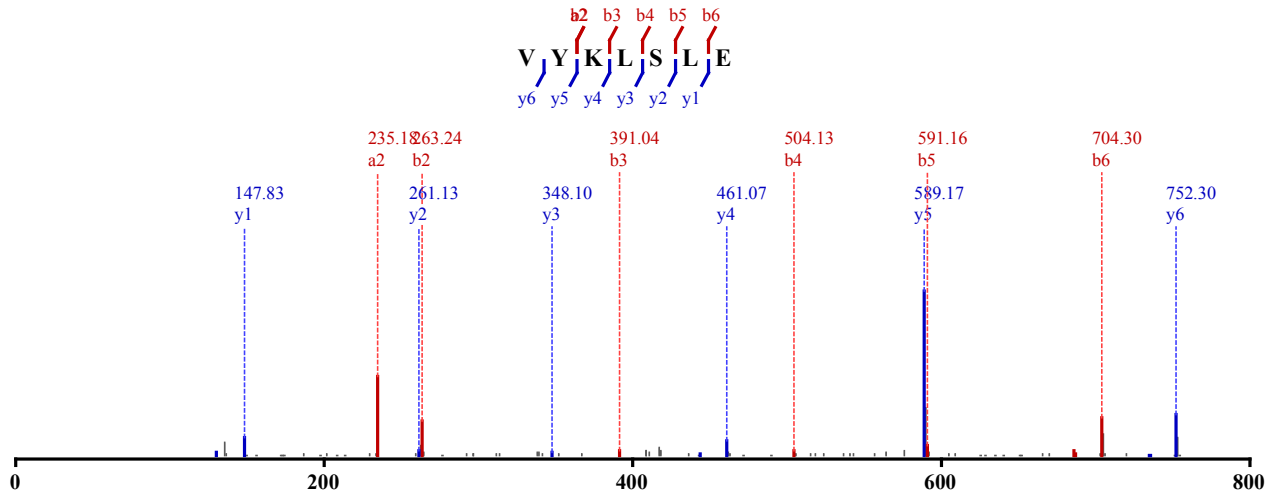

Not Modified

Identified in MSS482 with qvalue 0.00

Charge: 2, Exp. m/z: 426.247, Calc. m/z: 426.247

Data File: HeLa\_GluC\_pH6\_CID\_3xload\_3, Scans: 15166 - 15166

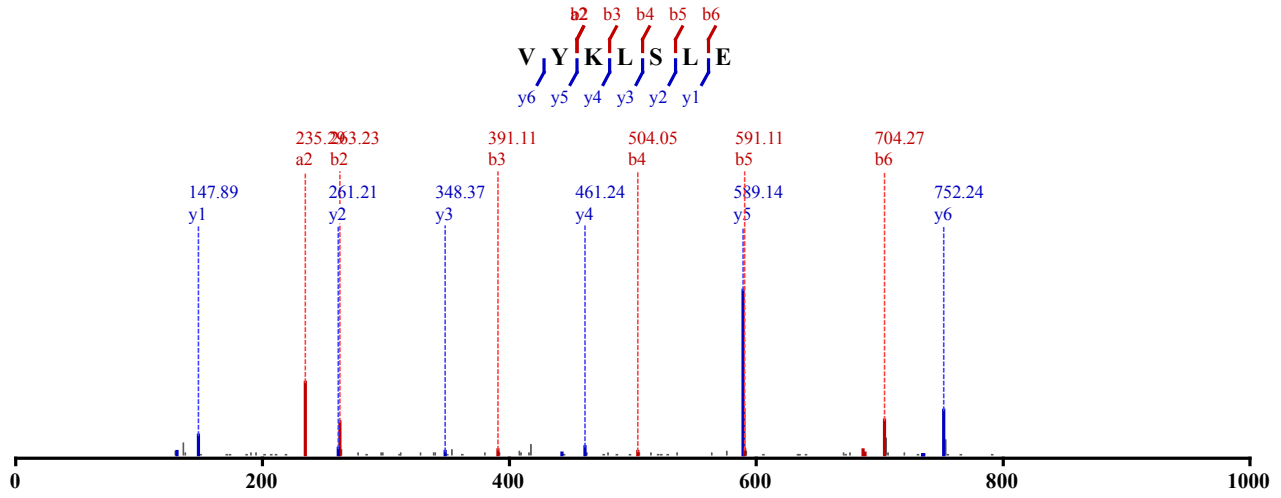

Not Modified

Identified in MSS482 with qvalue 0.00

Charge: 2, Exp. m/z: 426.247, Calc. m/z: 426.247

Data File: HeLa\_GluC\_pH6\_CID\_3xload, Scans: 15535 - 15535

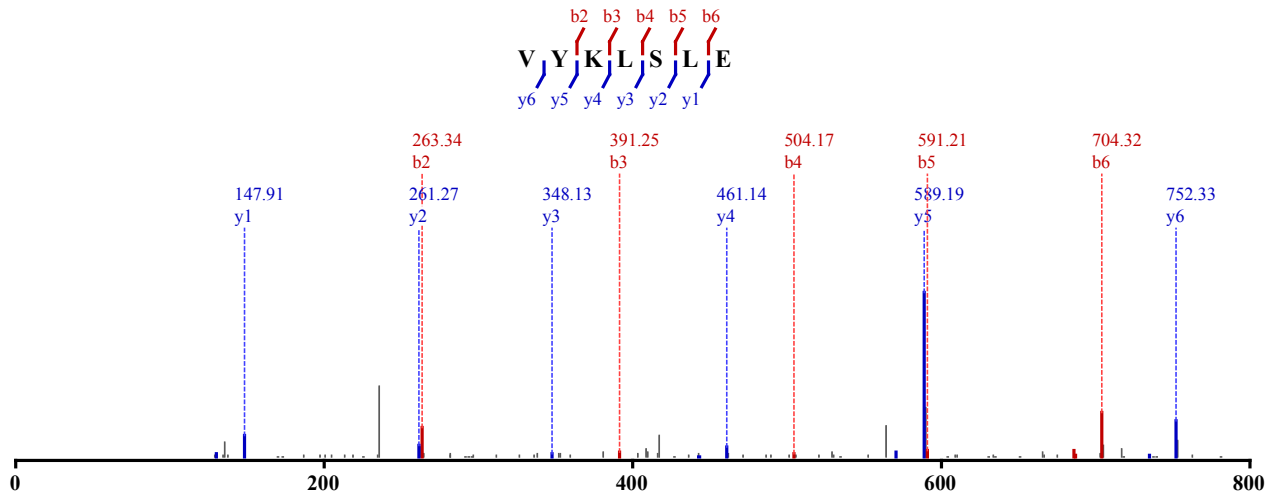

Not Modified

Identified in MSS482 with qvalue 0.00  
 Charge: 2, Exp. m/z: 426.247, Calc. m/z: 426.247  
 Data File: HeLa\_GluC\_pH6\_CID\_3xload, Scans: 15603 - 15603

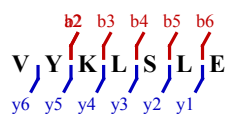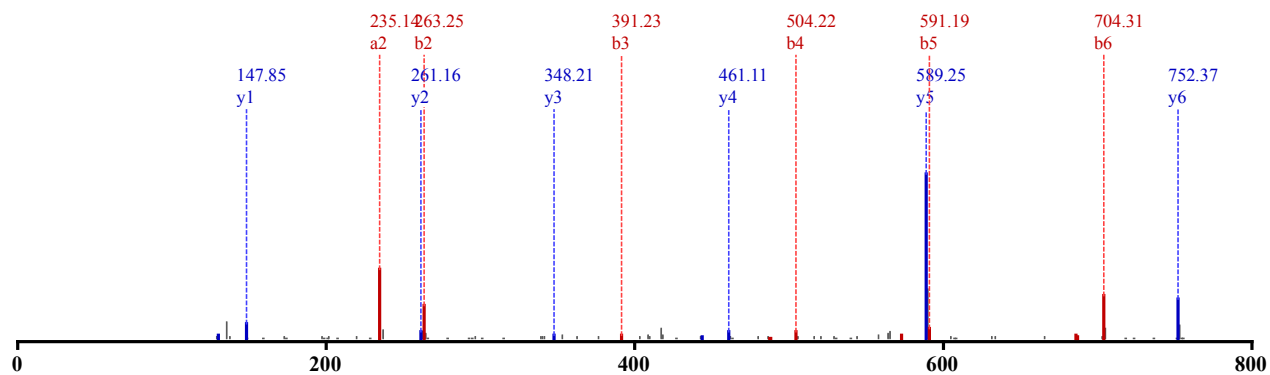

Not Modified  
 Identified in MSS482 with qvalue 0.00  
 Charge: 2, Exp. m/z: 426.247, Calc. m/z: 426.247  
 Data File: HeLa\_GluC\_pH6\_CID\_3xload, Scans: 15673 - 15673

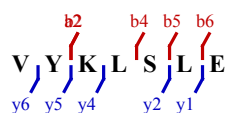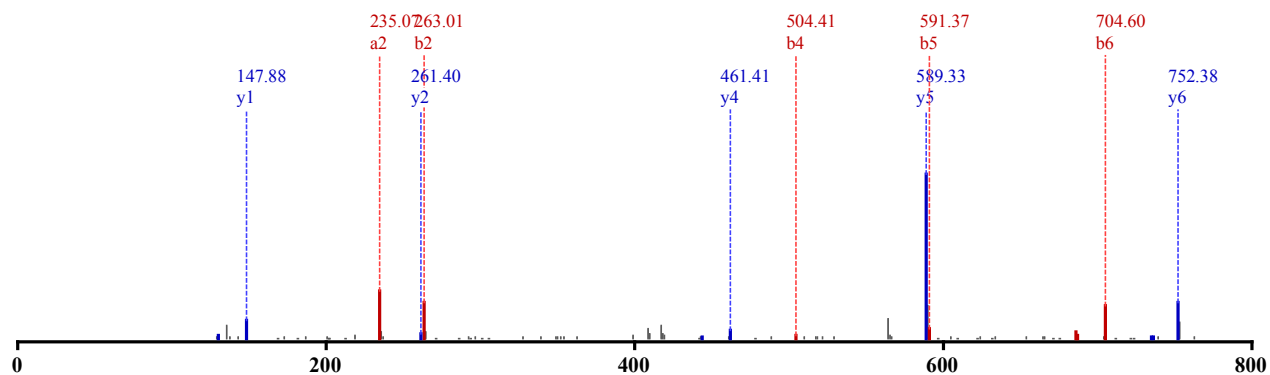

Not Modified  
 Identified in MSS482 with qvalue 0.00  
 Charge: 2, Exp. m/z: 426.247, Calc. m/z: 426.247  
 Data File: HeLa\_GluC\_pH6\_CID\_3xload, Scans: 15745 - 15745

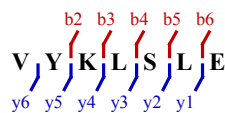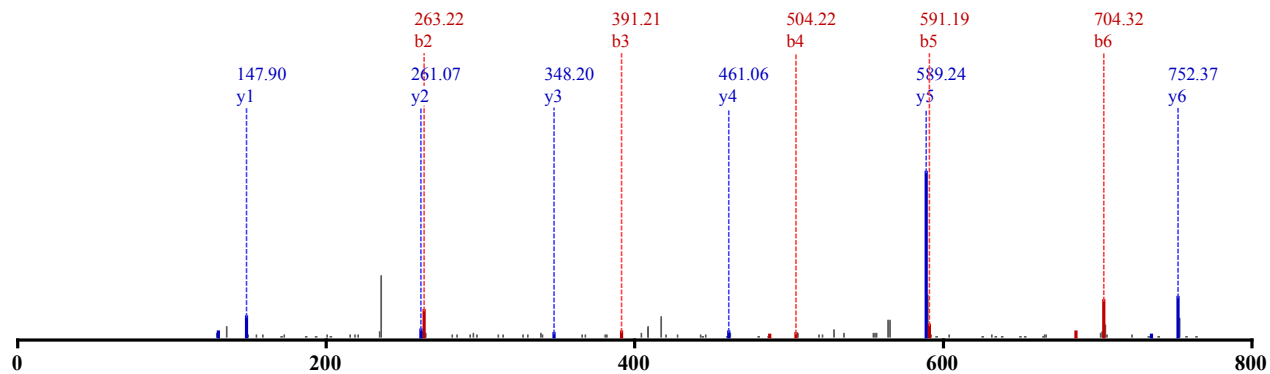

Not Modified  
 Identified in MSS482 with qvalue 0.00  
 Charge: 2, Exp. m/z: 426.247, Calc. m/z: 426.247  
 Data File: HeLa\_GluC\_pH8\_CID\_3xload\_2, Scans: 15388 - 15388

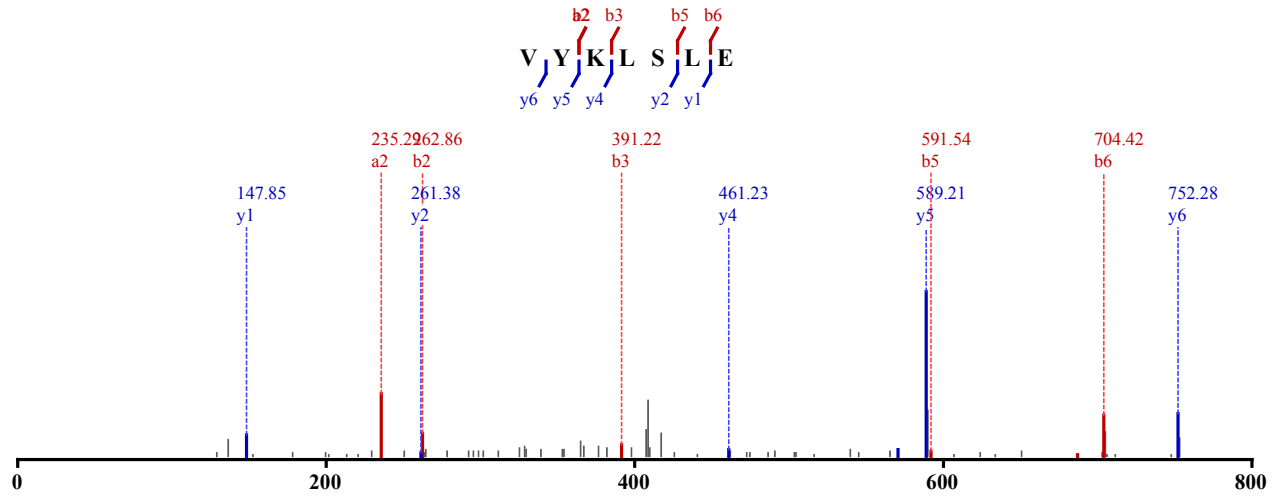

Not Modified  
 Identified in MSS482 with qvalue 0.00  
 Charge: 2, Exp. m/z: 426.247, Calc. m/z: 426.247  
 Data File: HeLa\_GluC\_pH8\_CID\_3xload, Scans: 16190 - 16190

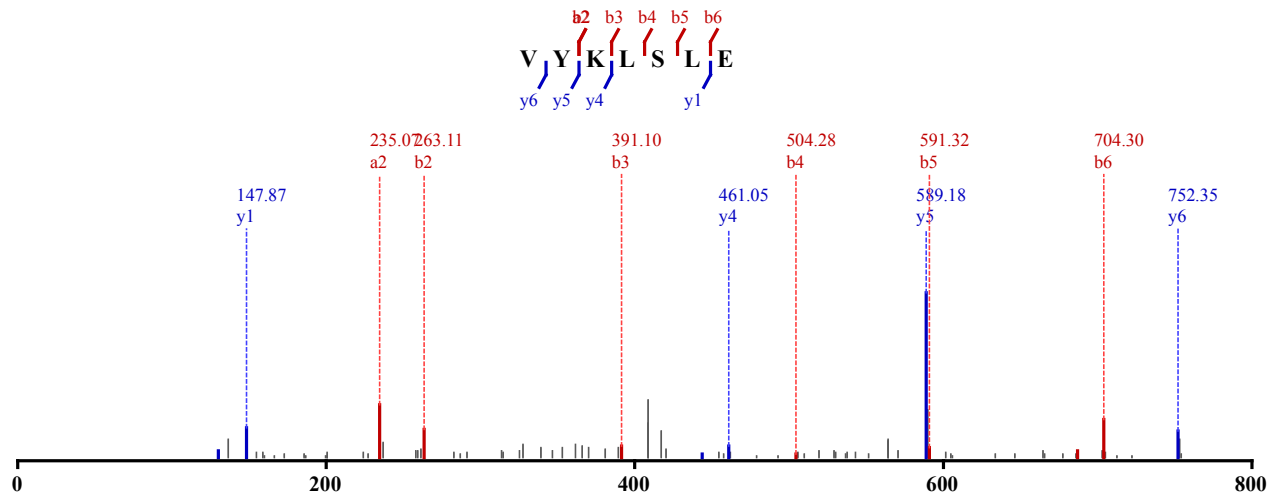

Not Modified  
 Identified in MSS482 with qvalue 0.00  
 Charge: 2, Exp. m/z: 426.247, Calc. m/z: 426.247  
 Data File: HeLa\_GluC\_pH3\_CID\_3xload, Scans: 14187 - 14187

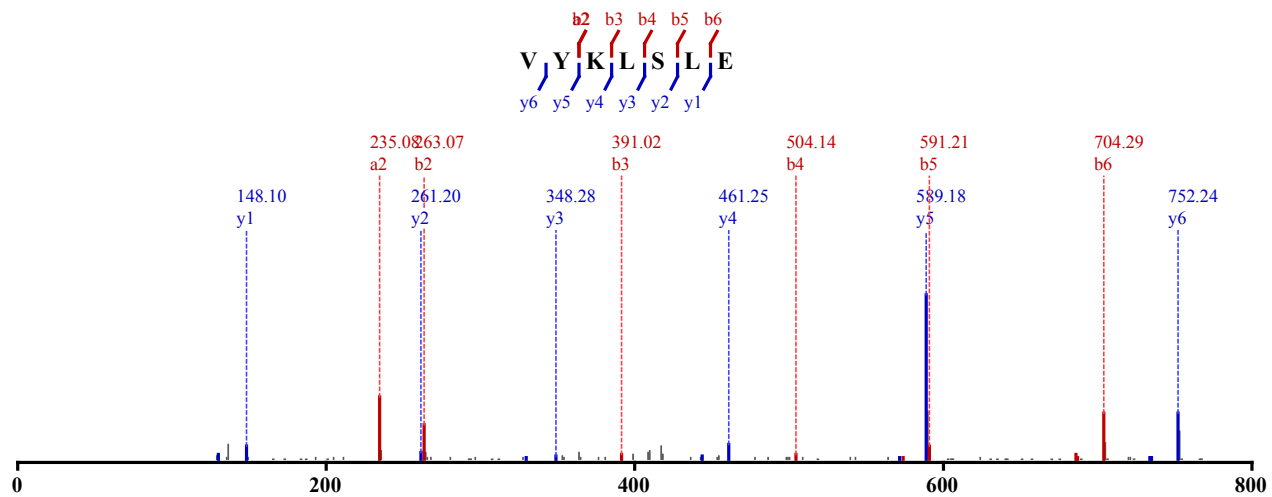

Not Modified  
 Identified in MSS486 with qvalue 0.01  
 Charge: 2, Exp. m/z: 426.247, Calc. m/z: 426.247  
 Data File: HeLa\_GluC\_pH4\_HCD\_1, Scans: 21775 - 21775

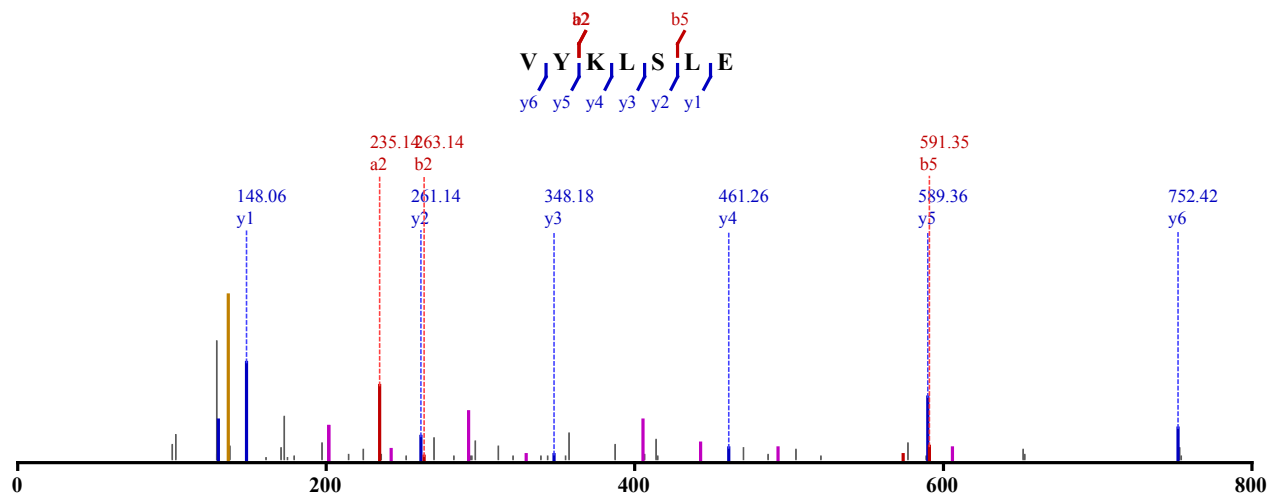

Not Modified  
 Identified in MSS486 with qvalue 0.00  
 Charge: 2, Exp. m/z: 426.247, Calc. m/z: 426.247  
 Data File: HeLa\_GluC\_pH6\_HCD\_1, Scans: 23811 - 23811

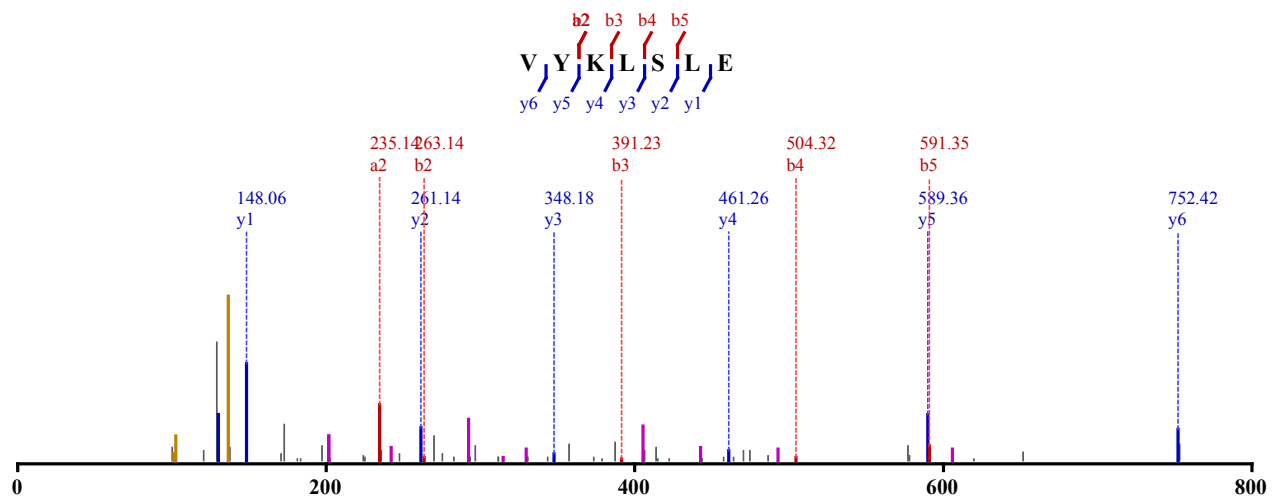

Not Modified  
 Identified in MSS486 with qvalue 0.01  
 Charge: 2, Exp. m/z: 426.247, Calc. m/z: 426.247



Data File: HeLa\_GluC\_pH6\_HCD\_1, Scans: 23904 - 23904

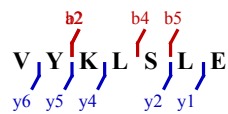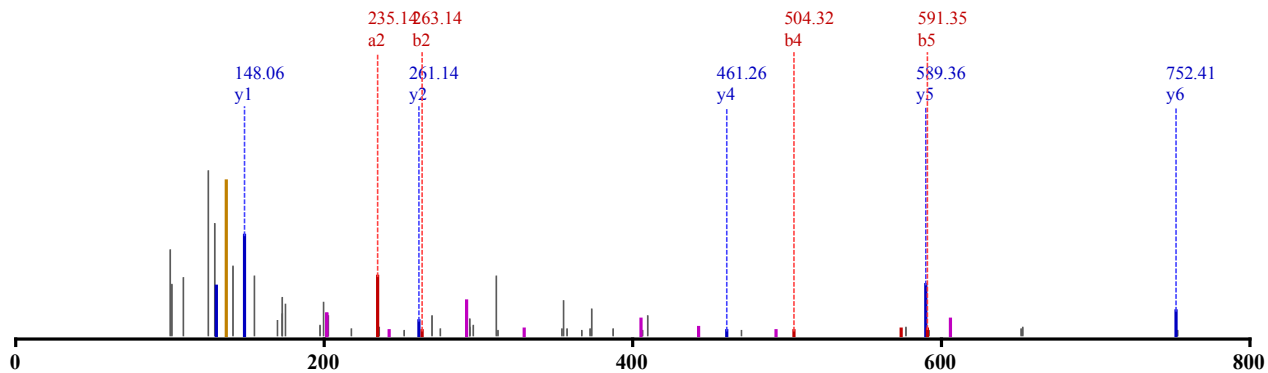

Not Modified

Identified in MSS486 with qvalue 0.00

Charge: 2, Exp. m/z: 426.247, Calc. m/z: 426.247

Data File: HeLa\_GluC\_pH6\_HCD\_3, Scans: 23725 - 23725

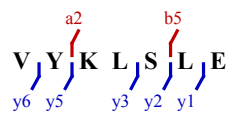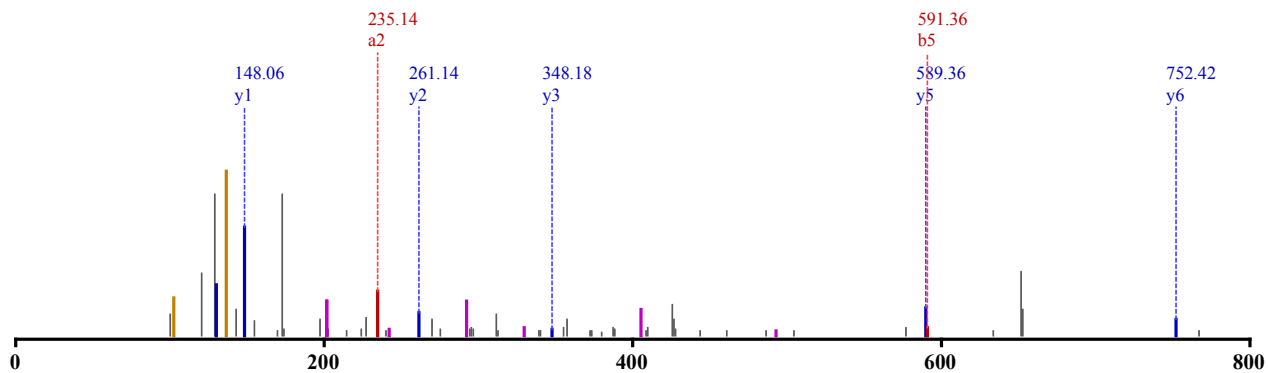

Not Modified

Identified in MSS486 with qvalue 0.01

Charge: 2, Exp. m/z: 426.247, Calc. m/z: 426.247

Data File: HeLa\_GluC\_pH4\_HCD\_2, Scans: 21789 - 21789

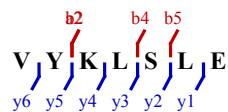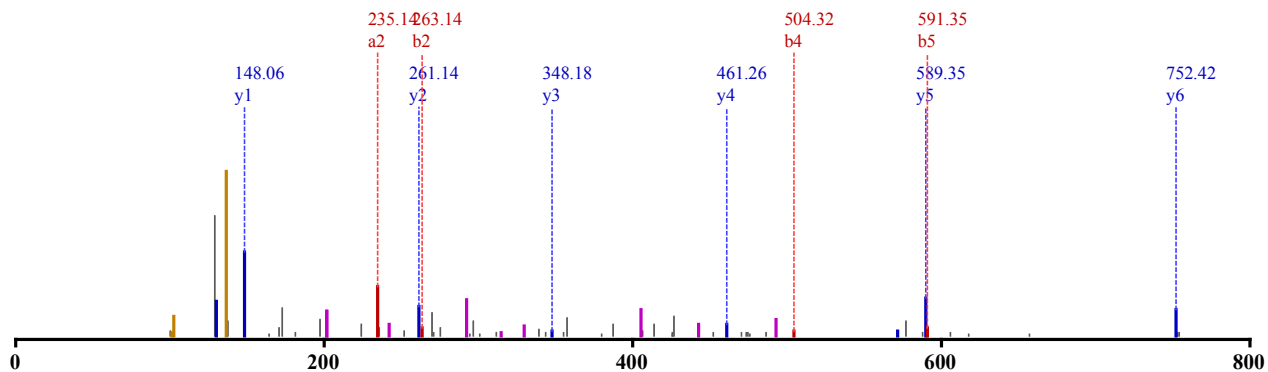

Not Modified

Identified in MSS103 with qvalue 0.01  
 Charge: 3, Exp. m/z: 431.578, Calc. m/z: 431.577  
 Data File: HeLa\_LET\_CID\_1, Scans: 17046 - 17046

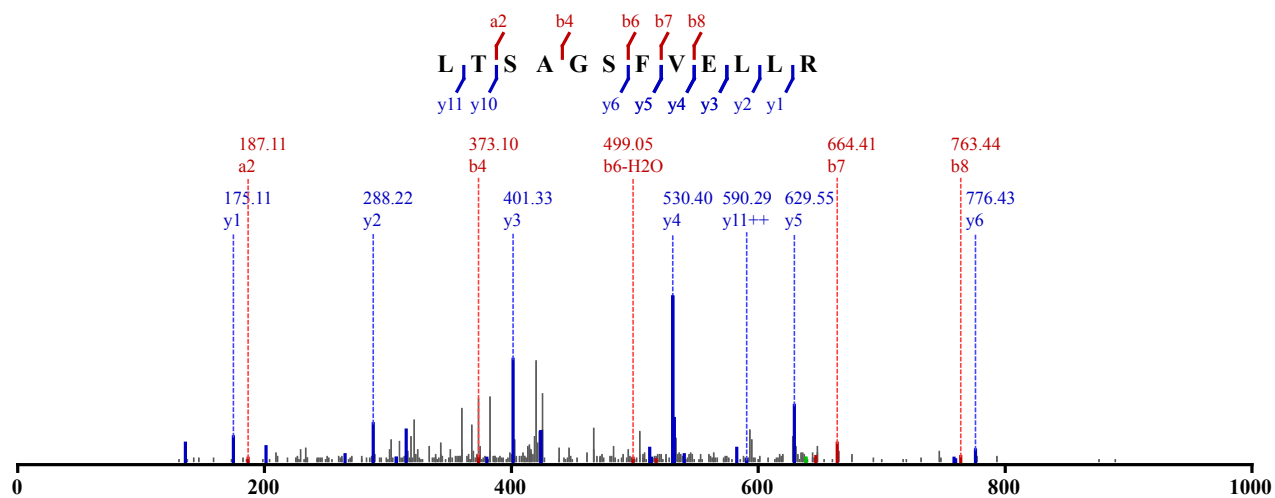

Not Modified  
 Identified in MSS130 with qvalue 0.01  
 Charge: 3, Exp. m/z: 431.579, Calc. m/z: 431.577  
 Data File: HeLa\_LysC-try\_HCD\_3, Scans: 20456 - 20456

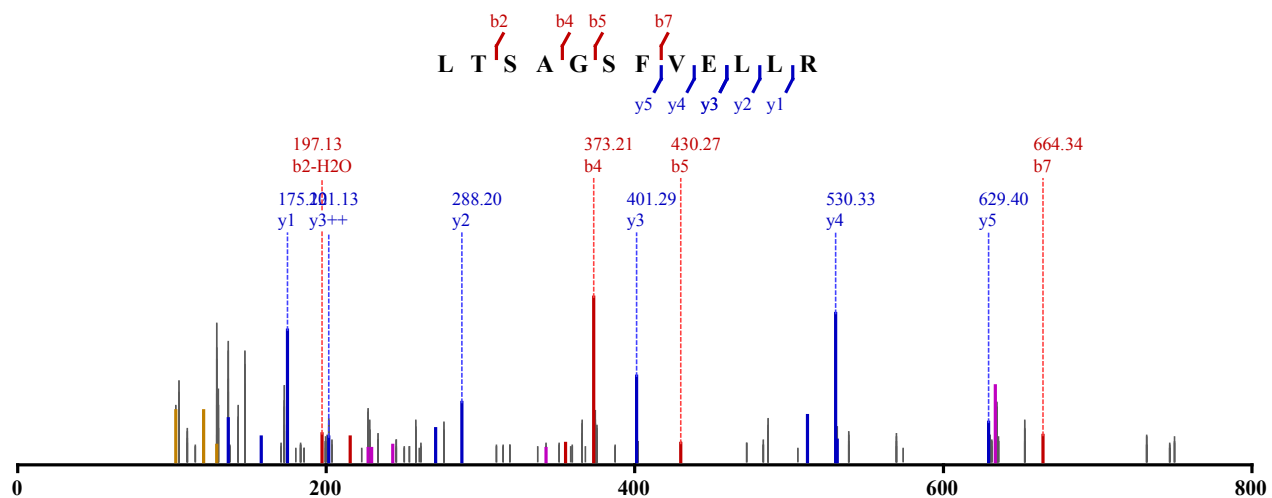

Not Modified  
 Identified in MSS259 with qvalue 0.01  
 Charge: 3, Exp. m/z: 431.579, Calc. m/z: 431.577  
 Data File: HeLa\_ArgC-LysC\_CID\_3, Scans: 14553 - 14553

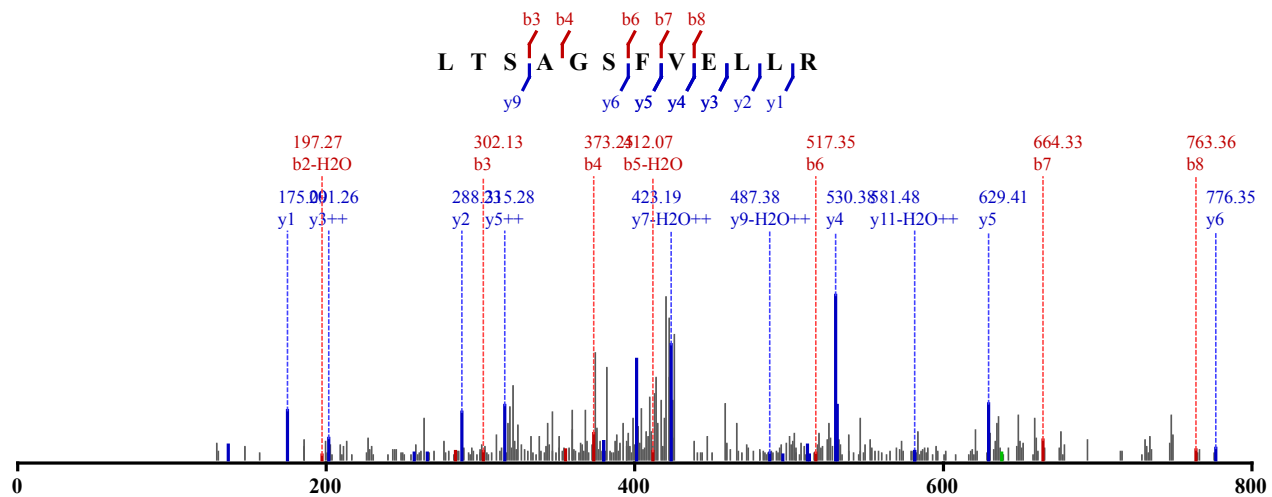

Not Modified

Identified in MSS275 with qvalue 0.00

Charge: 3, Exp. m/z: 431.578, Calc. m/z: 431.577

Data File: HeLa\_ArgC-LysC\_HCD\_2, Scans: 18912 - 18912

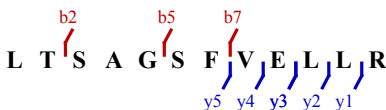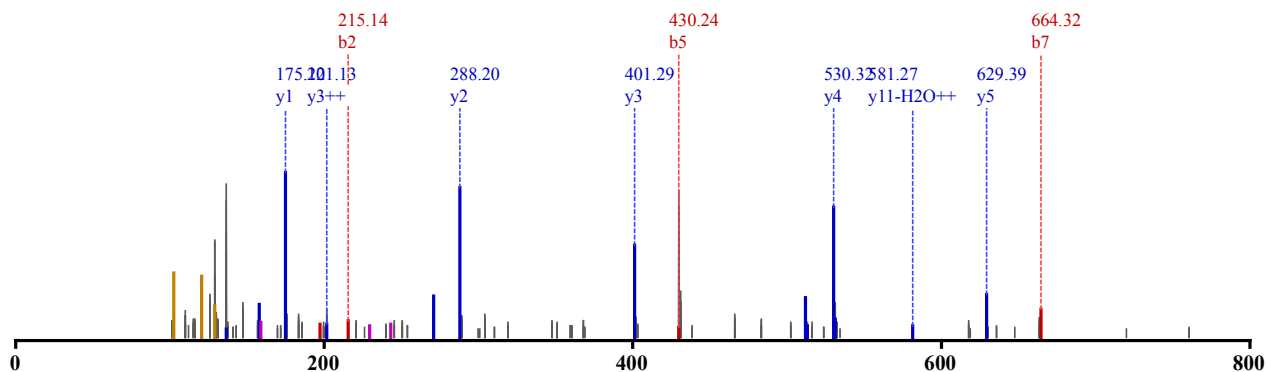

Not Modified

Identified in MSS301 with qvalue 0.00

Charge: 3, Exp. m/z: 431.579, Calc. m/z: 431.577

Data File: HeLa\_ArgC-Try\_HCD\_2, Scans: 18970 - 18970

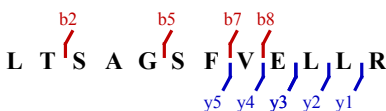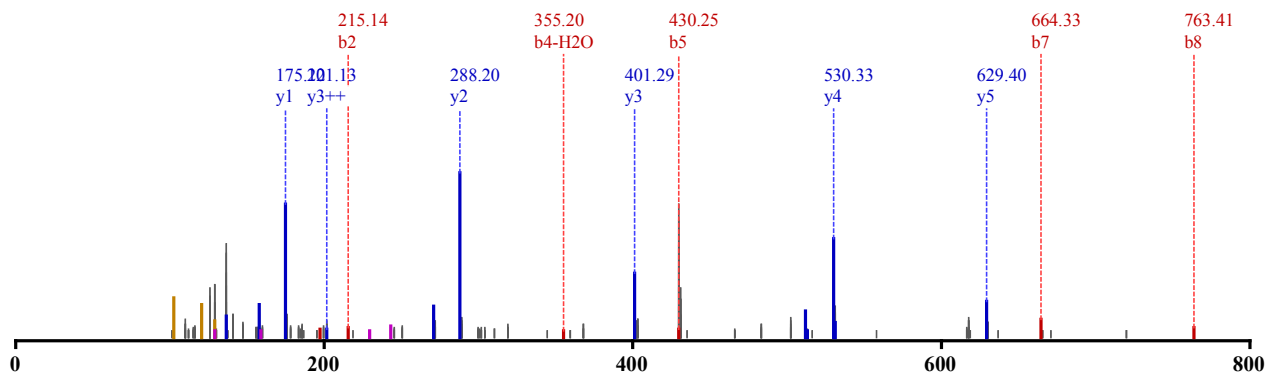

Not Modified

Identified in MSS480 with qvalue 0.00

Charge: 3, Exp. m/z: 431.579, Calc. m/z: 431.577

Data File: HeLa\_try\_pH5\_CID\_3xload\_2, Scans: 17205 - 17205

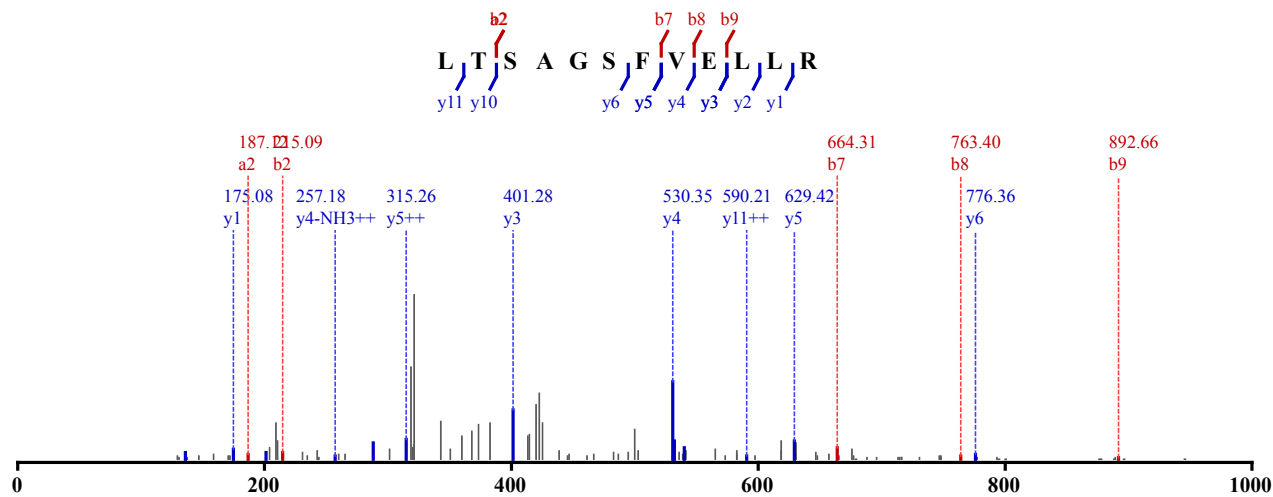

Not Modified  
 Identified in MSS480 with qvalue 0.00  
 Charge: 3, Exp. m/z: 431.579, Calc. m/z: 431.577  
 Data File: HeLa\_try\_pH8\_CID\_3xload\_3, Scans: 24876 - 24876

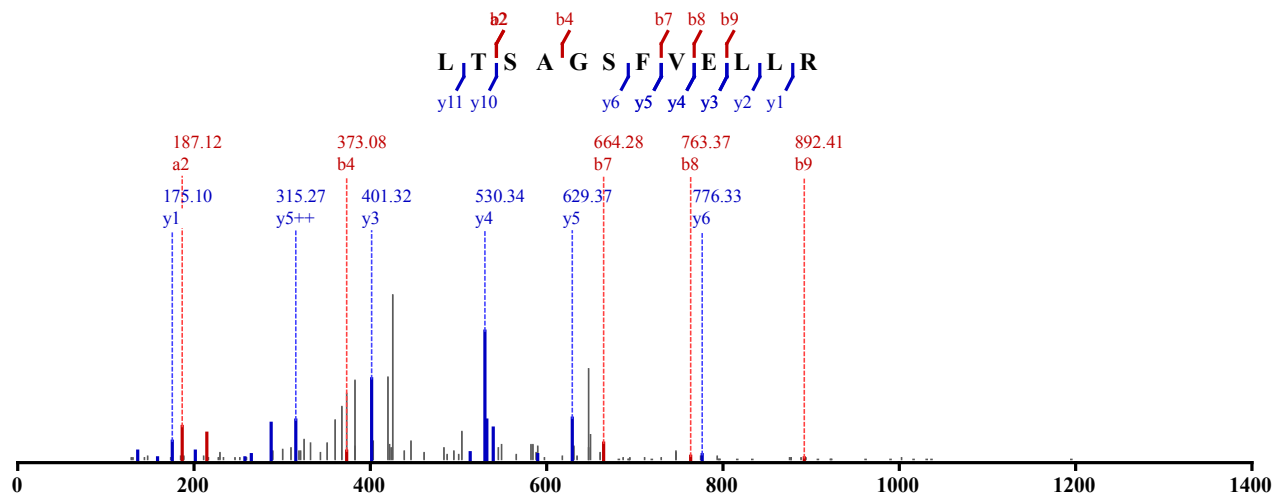

Not Modified  
 Identified in MSS487 with qvalue 0.01  
 Charge: 3, Exp. m/z: 431.578, Calc. m/z: 431.577  
 Data File: HeLa\_ArgC-Try\_pH5\_HCD\_2, Scans: 17236 - 17236

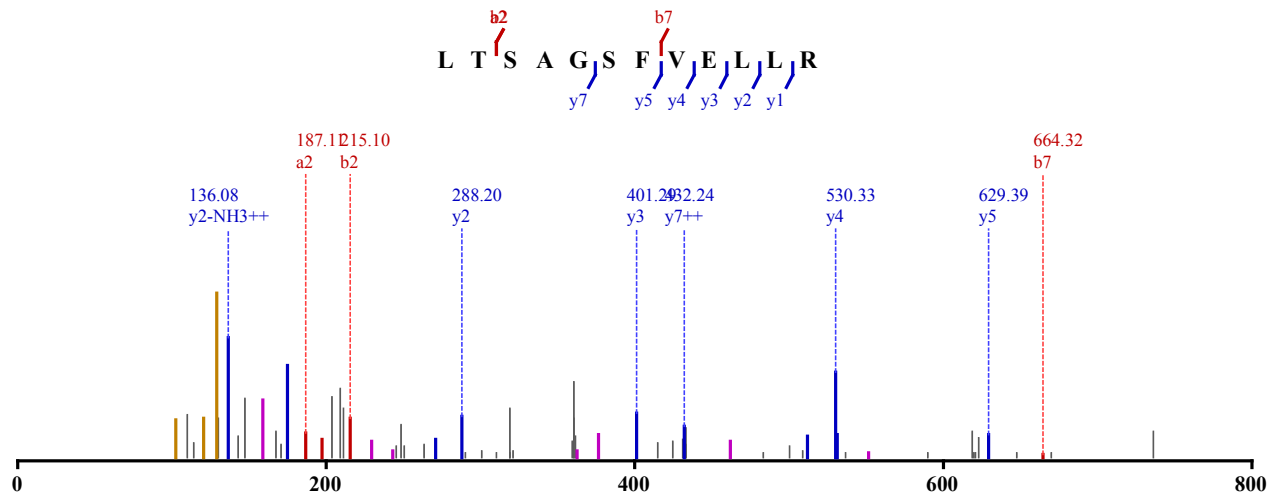

Not Modified  
 Identified in MSS479 with qvalue 0.01  
 Charge: 2, Exp. m/z: 817.896, Calc. m/z: 817.897

Data File: HeLa\_AspN\_pH8\_HCD\_3, Scans: 25832 - 25832

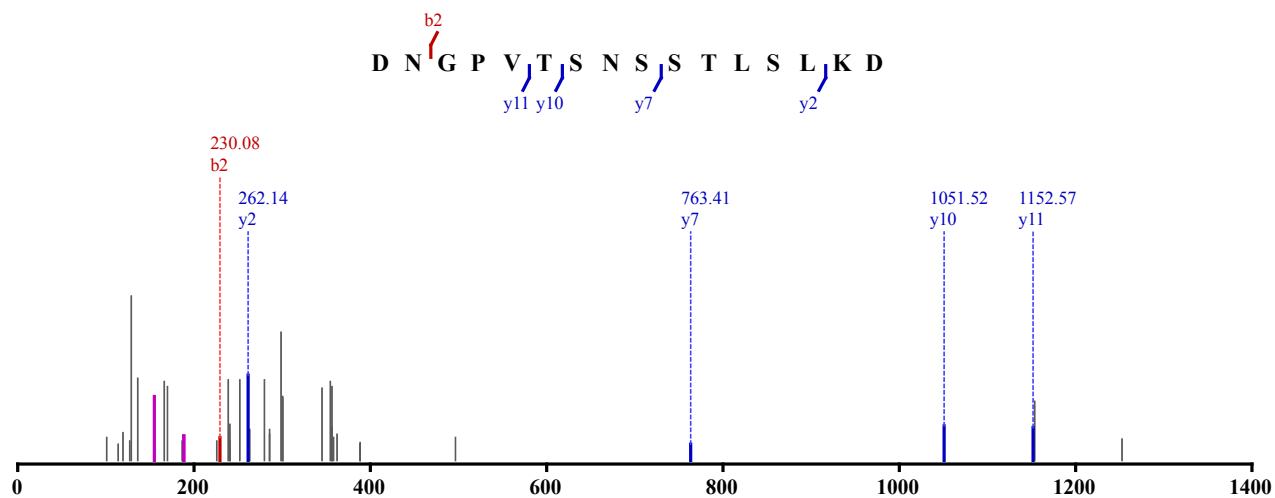

Not Modified

Identified in MSS479 with qvalue 0.00

Charge: 2, Exp. m/z: 817.896, Calc. m/z: 817.897

Data File: HeLa\_AspN\_pH11\_HCD\_1, Scans: 30108 - 30108

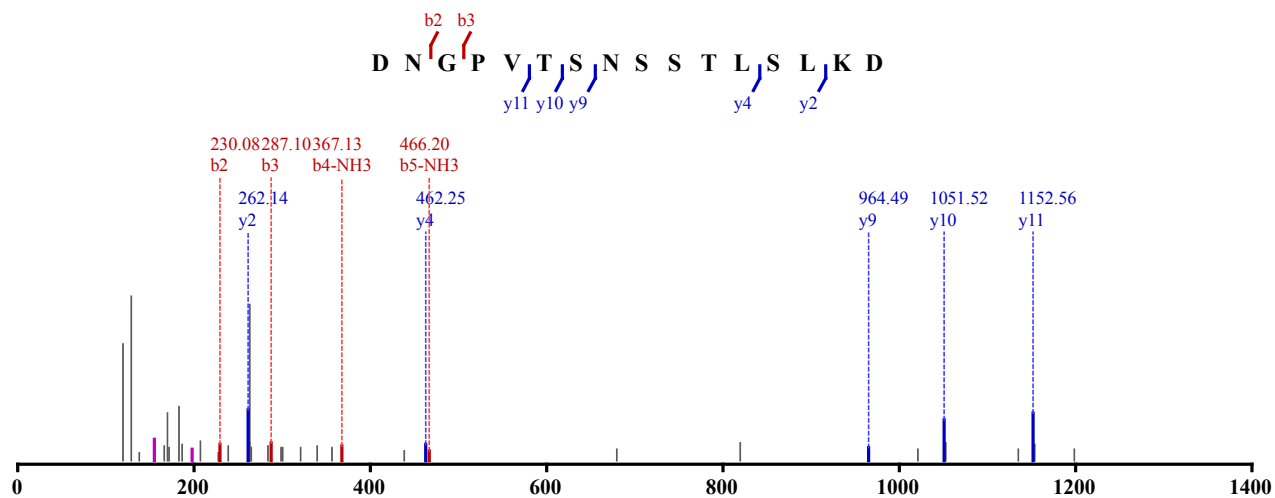

Not Modified

Identified in MSS479 with qvalue 0.00

Charge: 2, Exp. m/z: 817.898, Calc. m/z: 817.897

Data File: HeLa\_AspN\_pH11\_HCD\_2, Scans: 28979 - 28979

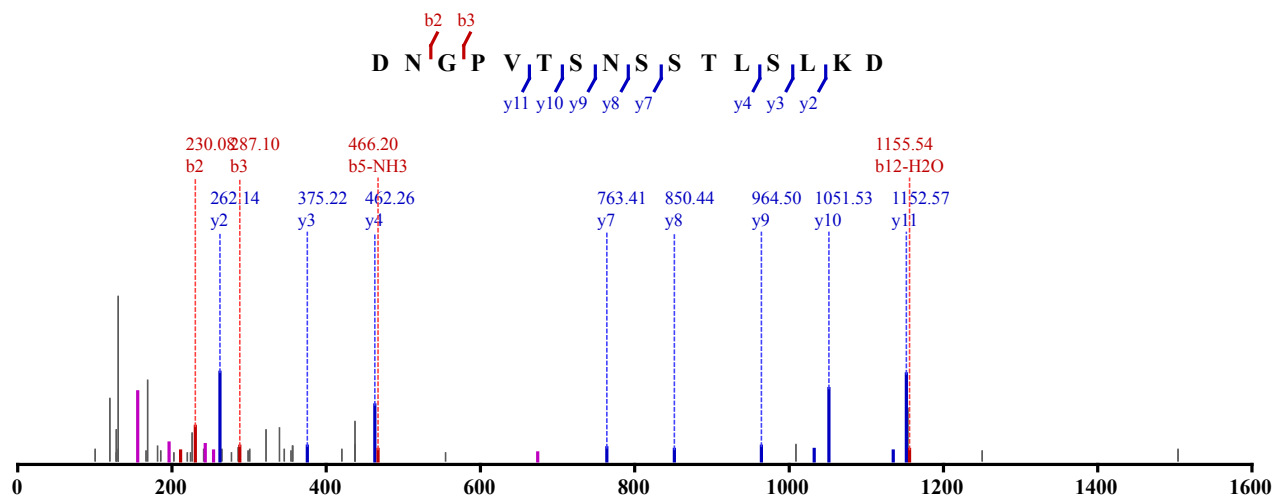

Not Modified

Identified in MSS479 with qvalue 0.00  
 Charge: 2, Exp. m/z: 817.896, Calc. m/z: 817.897  
 Data File: HeLa\_AspN\_pH11\_HCD\_3, Scans: 28353 - 28353

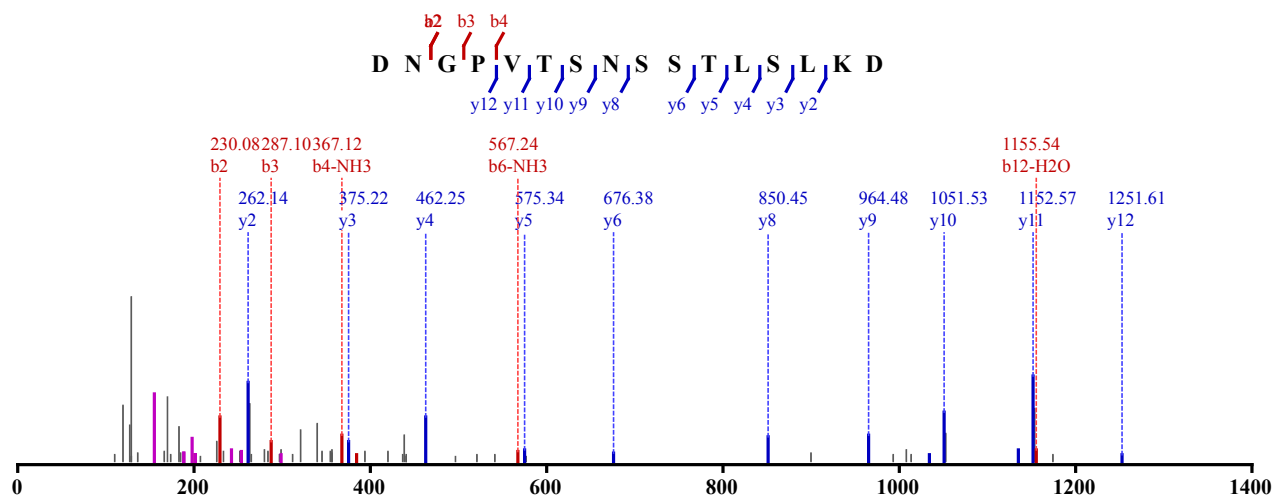

Not Modified  
 Identified in MSS483 with qvalue 0.00  
 Charge: 2, Exp. m/z: 817.897, Calc. m/z: 817.897  
 Data File: HeLa\_AspN\_pH11\_CID\_3xload\_2, Scans: 23108 - 23108

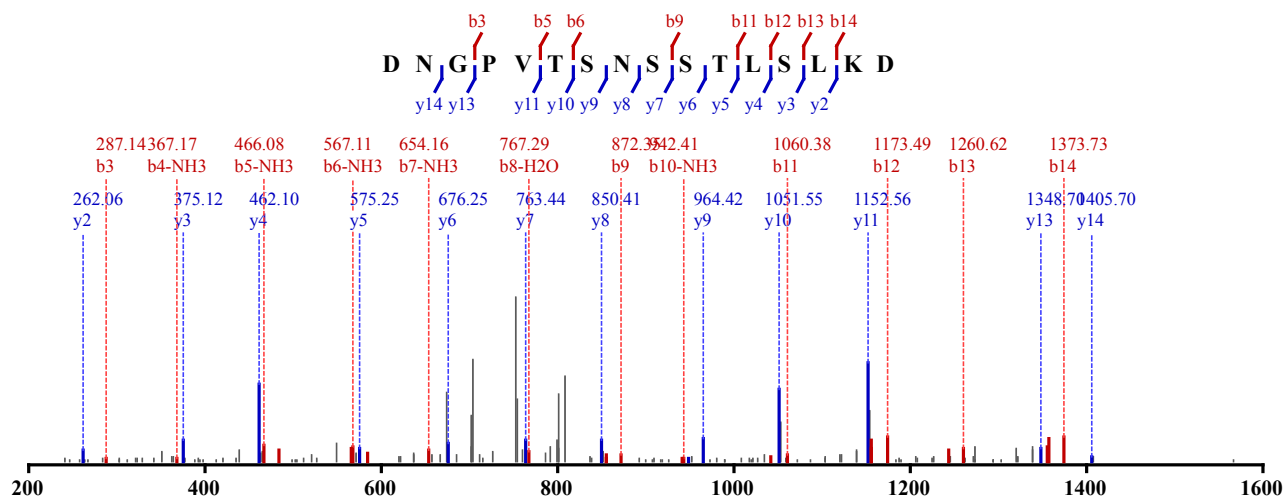

Not Modified  
 Identified in MSS479 with qvalue 0.00  
 Charge: 4, Exp. m/z: 789.383, Calc. m/z: 789.382  
 Data File: HeLa\_AspN\_pH2\_HCD\_1, Scans: 42703 - 42703

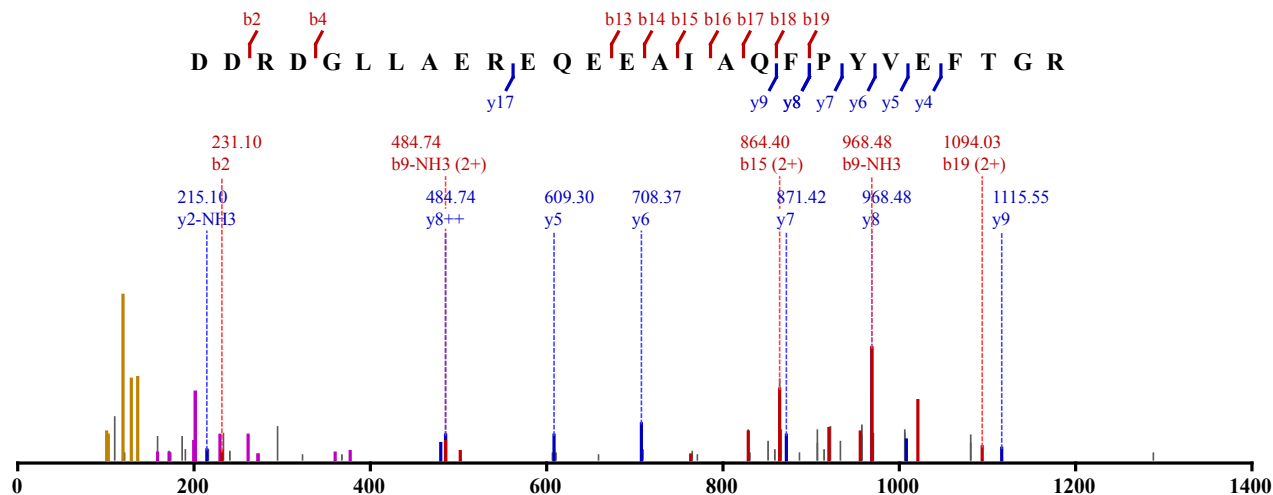

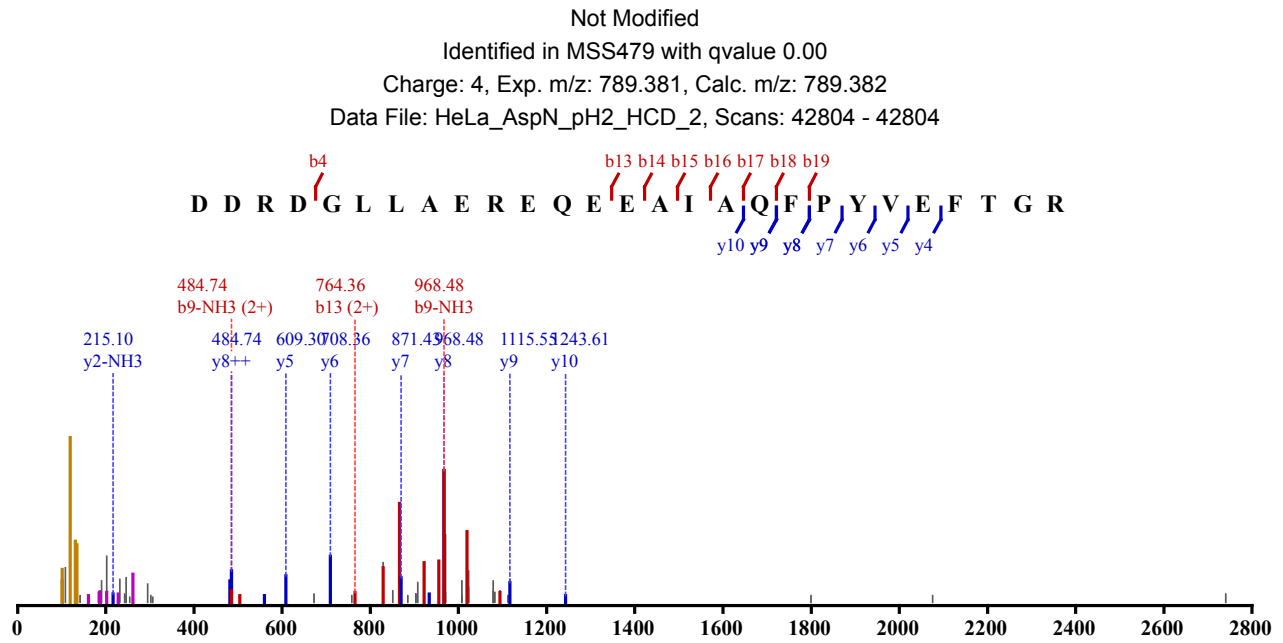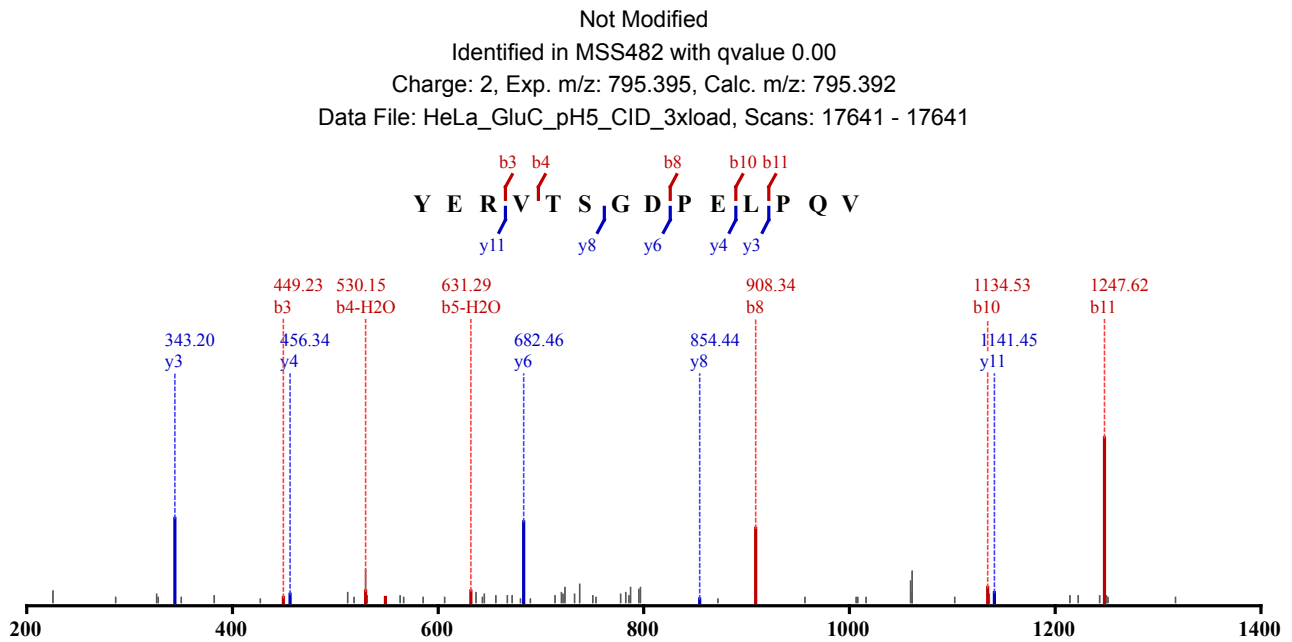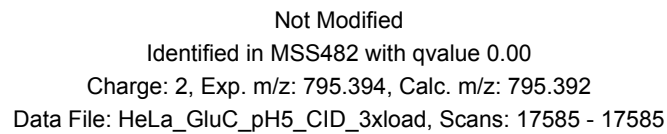

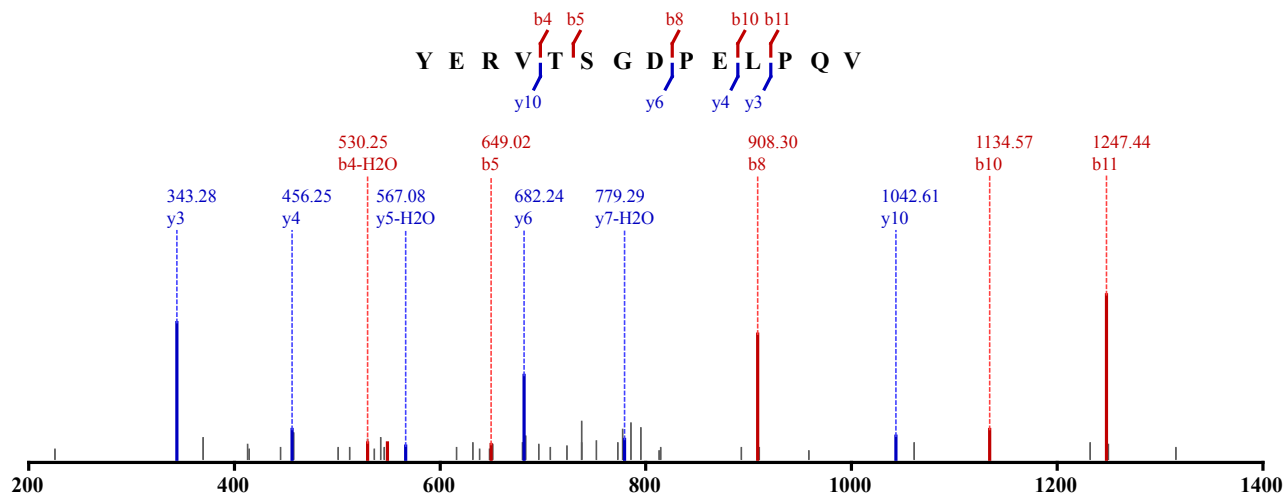

Not Modified  
 Identified in MSS482 with qvalue 0.01  
 Charge: 2, Exp. m/z: 795.395, Calc. m/z: 795.392  
 Data File: HeLa\_GluC\_pH4\_CID\_3xload\_2, Scans: 17838 - 17838

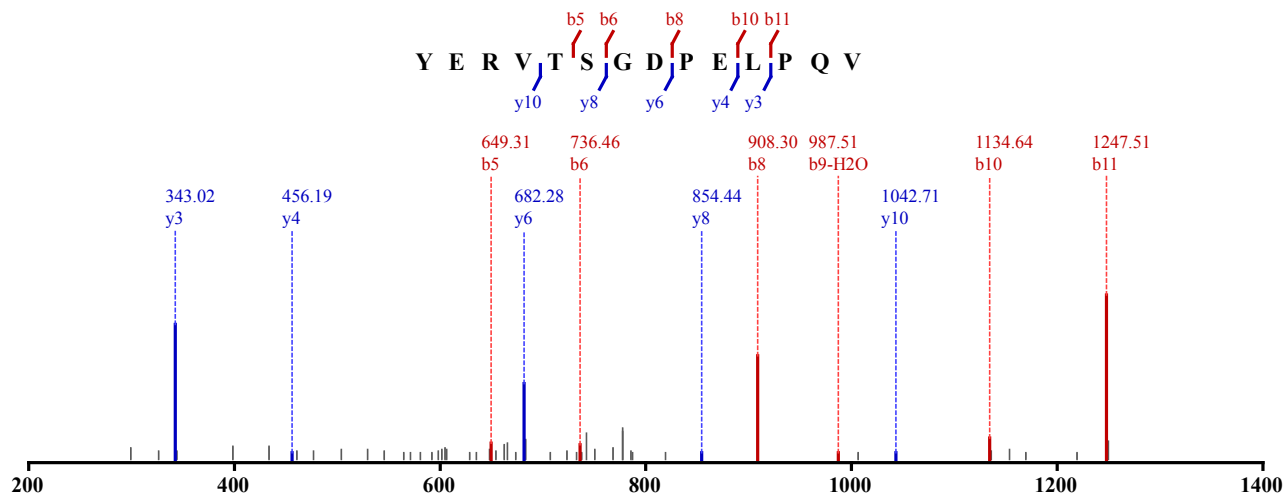

Not Modified  
 Identified in MSS482 with qvalue 0.01  
 Charge: 2, Exp. m/z: 795.394, Calc. m/z: 795.392  
 Data File: HeLa\_GluC\_pH4\_CID\_3xload, Scans: 17464 - 17464

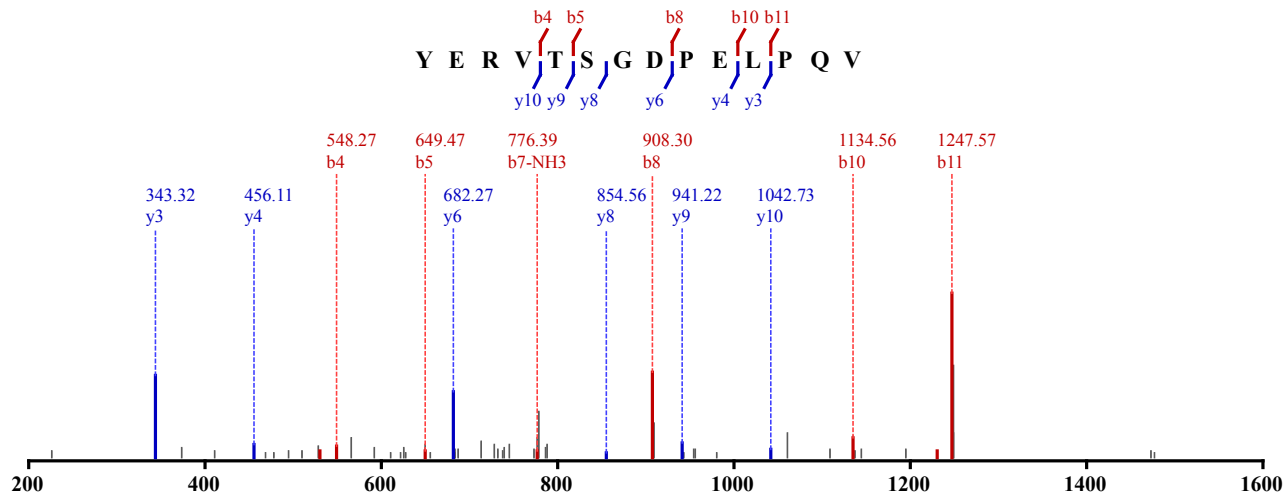

Not Modified  
 Identified in MSS482 with qvalue 0.01  
 Charge: 2, Exp. m/z: 795.395, Calc. m/z: 795.392



Data File: HeLa\_GluC\_pH5\_CID\_3xload\_3, Scans: 17873 - 17873

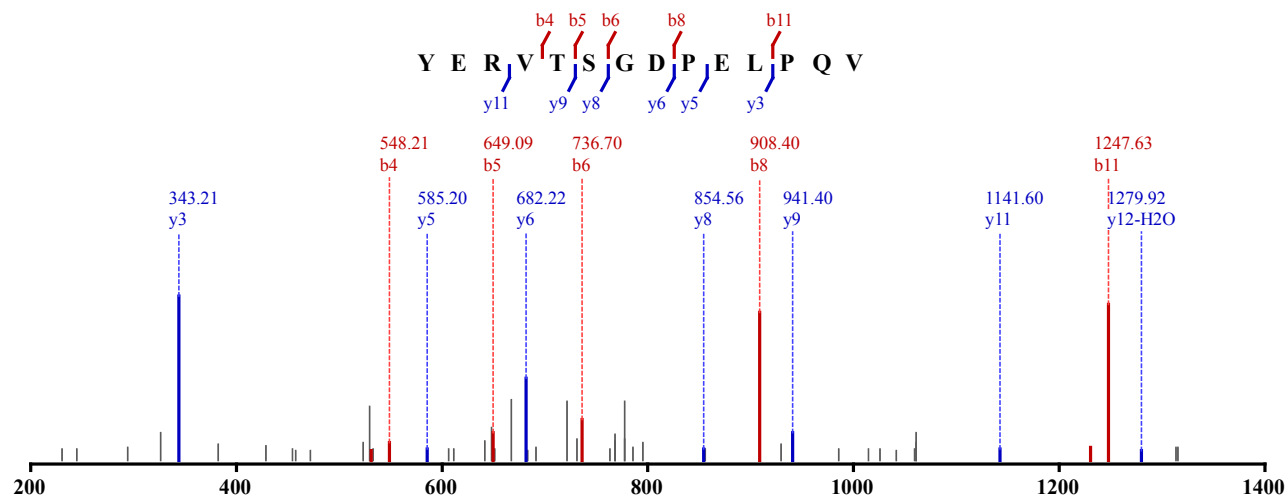

Not Modified

Identified in MSS482 with qvalue 0.00

Charge: 2, Exp. m/z: 795.394, Calc. m/z: 795.392

Data File: HeLa\_GluC\_pH5\_CID\_3xload\_3, Scans: 17934 - 17934

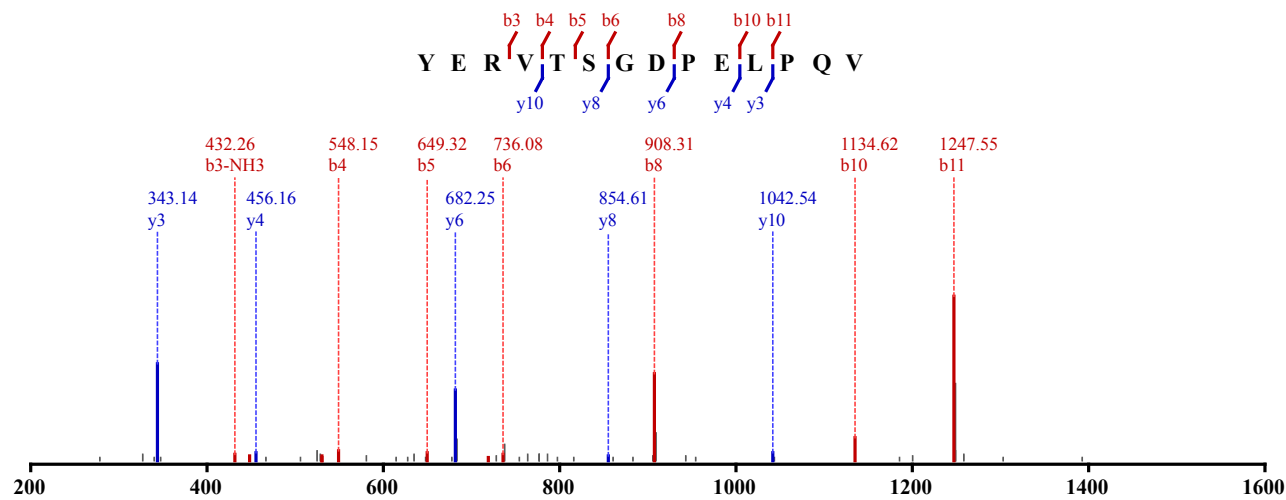

Not Modified

Identified in MSS484 with qvalue 0.00

Charge: 2, Exp. m/z: 1002.020, Calc. m/z: 1002.017

Data File: HeLa\_Try\_pH3\_HCD\_2, Scans: 60062 - 60062

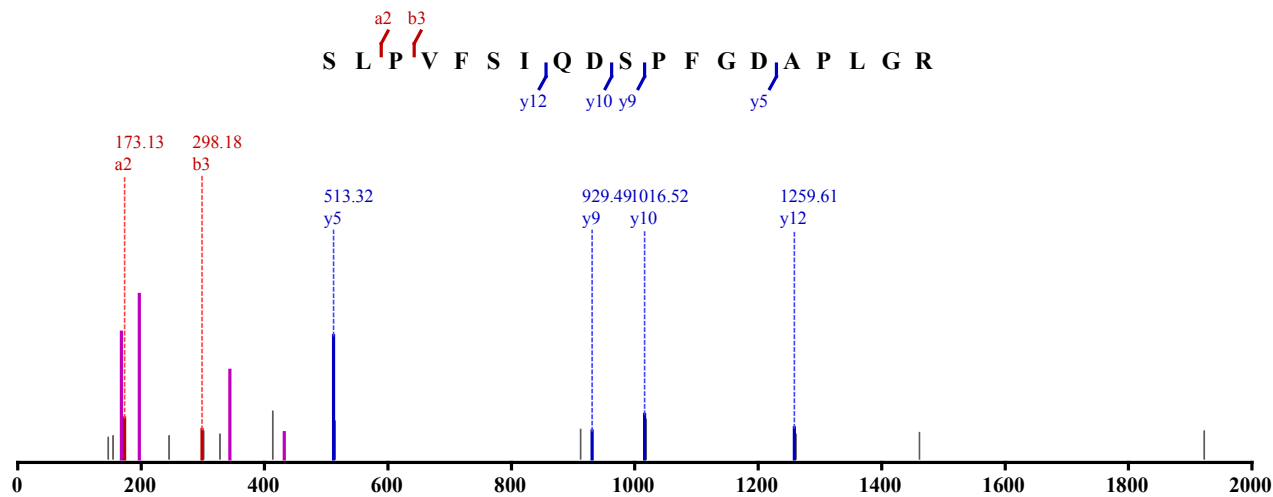

Not Modified

Identified in MSS484 with qvalue 0.00  
 Charge: 2, Exp. m/z: 1002.020, Calc. m/z: 1002.017  
 Data File: HeLa\_Try\_pH3\_HCD\_1, Scans: 60252 - 60252

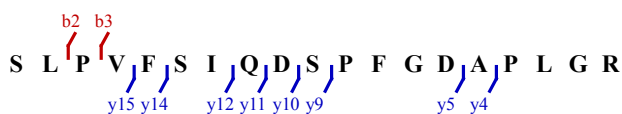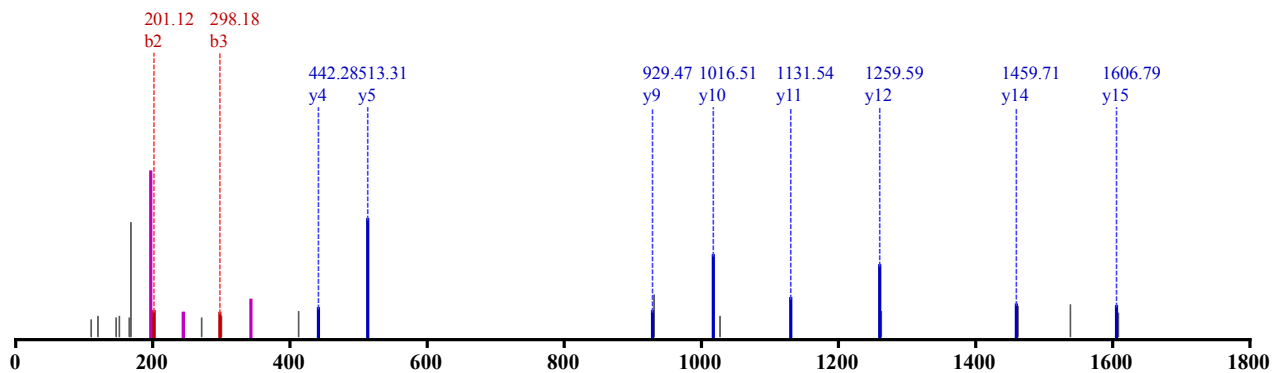

Not Modified  
 Identified in MSS484 with qvalue 0.00  
 Charge: 2, Exp. m/z: 1002.020, Calc. m/z: 1002.017  
 Data File: HeLa\_Try\_pH3\_HCD\_3, Scans: 57893 - 57893

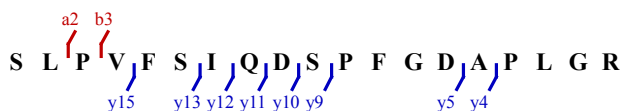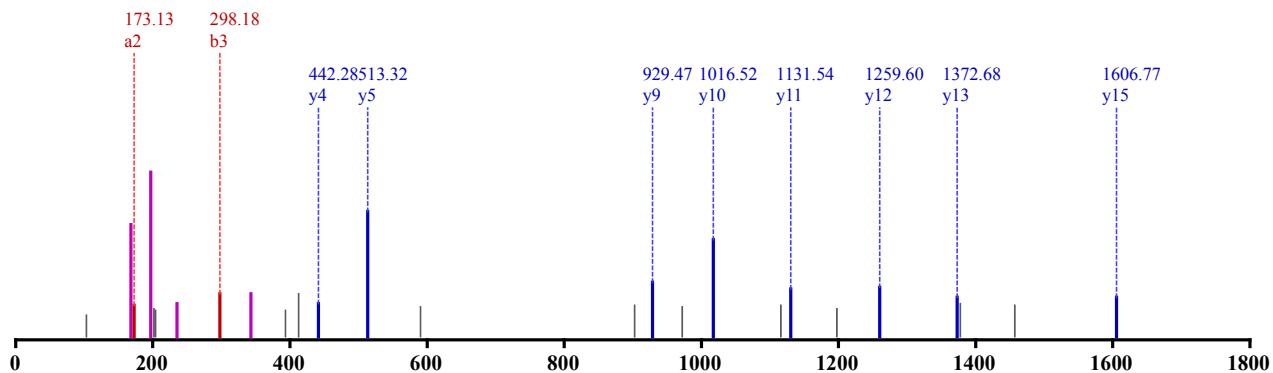

Not Modified  
 Identified in MSS480 with qvalue 0.00  
 Charge: 2, Exp. m/z: 641.320, Calc. m/z: 641.322  
 Data File: HeLa\_try\_pH5\_CID\_3xload\_3, Scans: 28521 - 28521

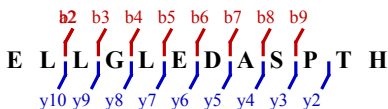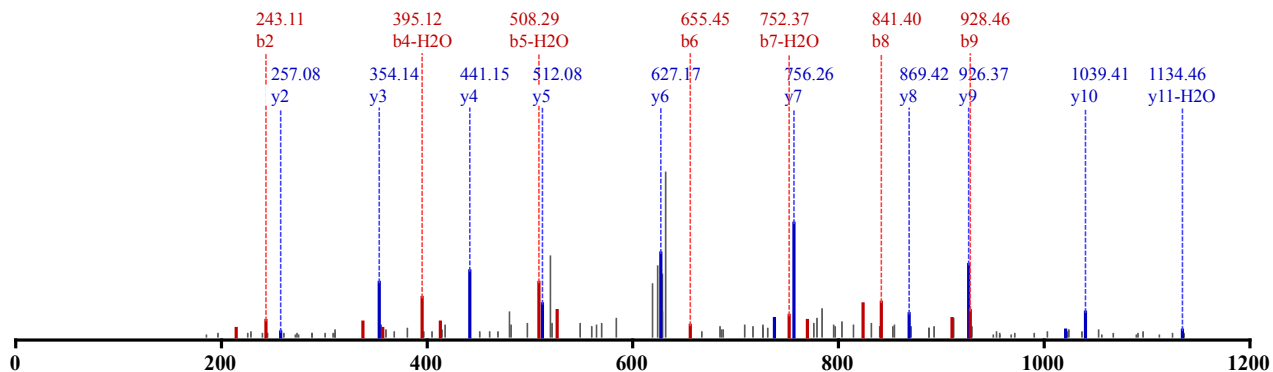

Not Modified

Identified in MSS484 with qvalue 0.00

Charge: 2, Exp. m/z: 641.320, Calc. m/z: 641.317

Data File: HeLa\_Try\_pH4\_HCD\_2, Scans: 37404 - 37404

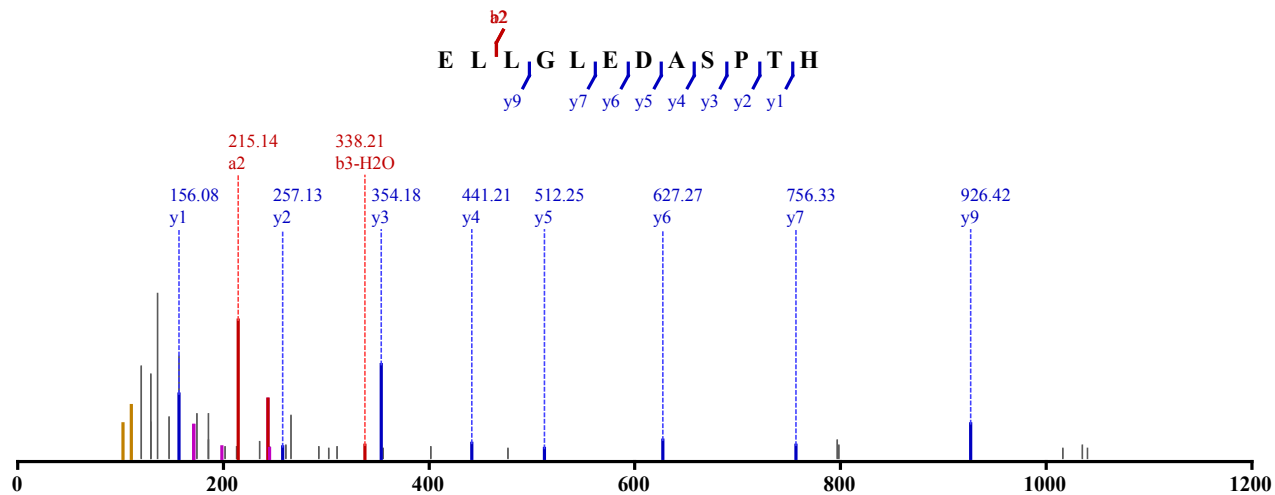

Not Modified

Identified in MSS484 with qvalue 0.00

Charge: 2, Exp. m/z: 641.319, Calc. m/z: 641.317

Data File: HeLa\_Try\_pH4\_HCD\_3, Scans: 36035 - 36035

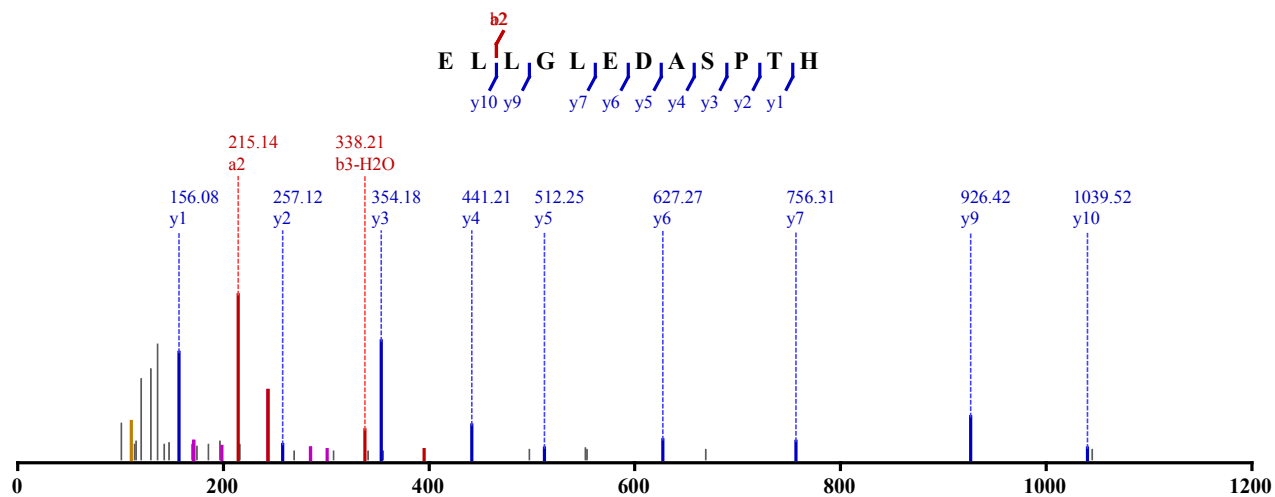

Not Modified

Identified in MSS484 with qvalue 0.00

Charge: 2, Exp. m/z: 641.821, Calc. m/z: 641.317

Data File: HeLa\_Try\_pH5\_HCD\_1, Scans: 42243 - 42243

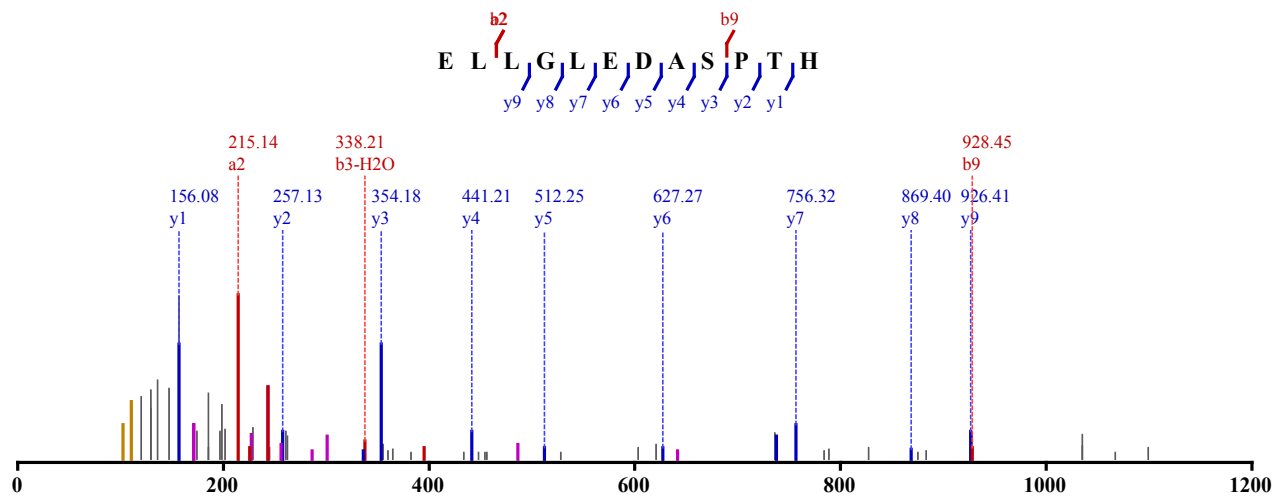

Not Modified  
 Identified in MSS484 with qvalue 0.00  
 Charge: 2, Exp. m/z: 641.317, Calc. m/z: 641.317  
 Data File: HeLa\_Try\_pH5\_HCD\_2, Scans: 37744 - 37744

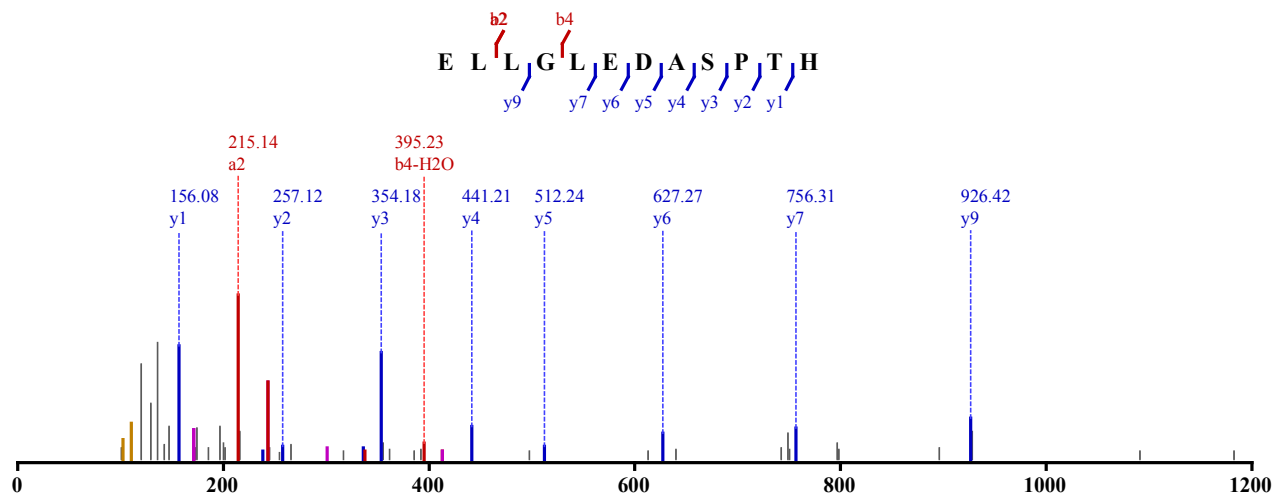

Not Modified  
 Identified in MSS119 with qvalue 0.00  
 Charge: 2, Exp. m/z: 786.387, Calc. m/z: 786.387  
 Data File: HeLa\_GluC\_HCD\_2, Scans: 17170 - 17170

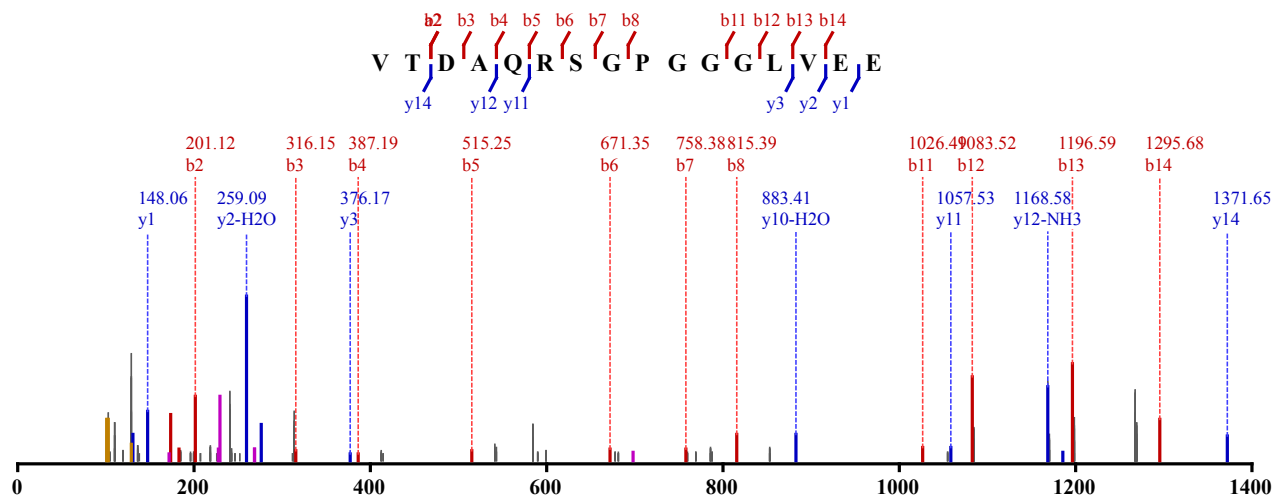

Not Modified  
 Identified in MSS482 with qvalue 0.01  
 Charge: 2, Exp. m/z: 786.386, Calc. m/z: 786.387

Data File: HeLa\_GluC\_pH8\_CID\_3xload\_3, Scans: 11828 - 11828

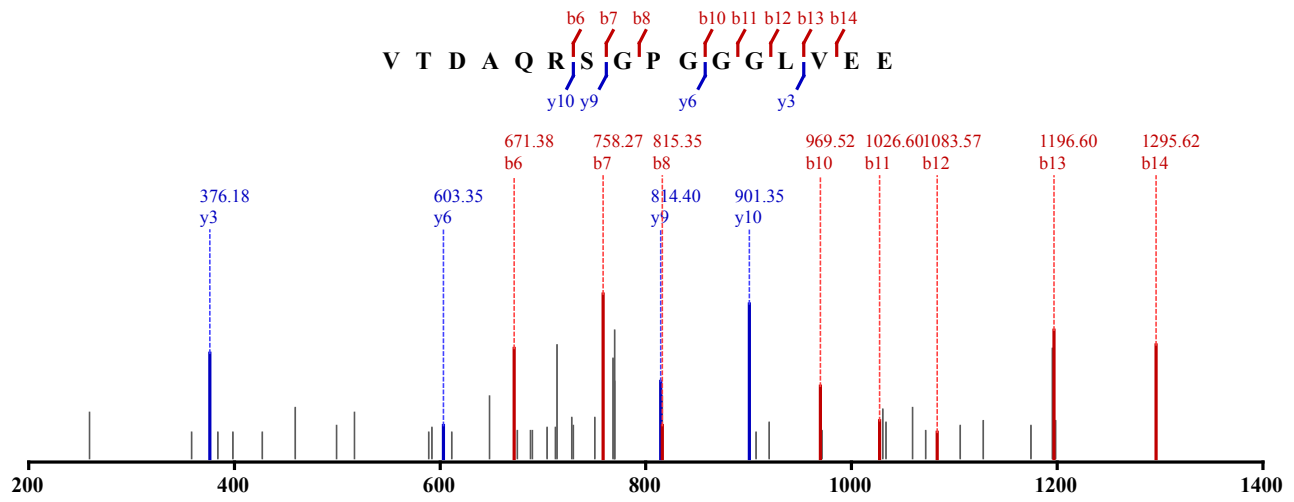

Not Modified

Identified in MSS482 with qvalue 0.00

Charge: 2, Exp. m/z: 786.388, Calc. m/z: 786.387

Data File: HeLa\_GluC\_pH11\_CID\_3xload, Scans: 14896 - 14896

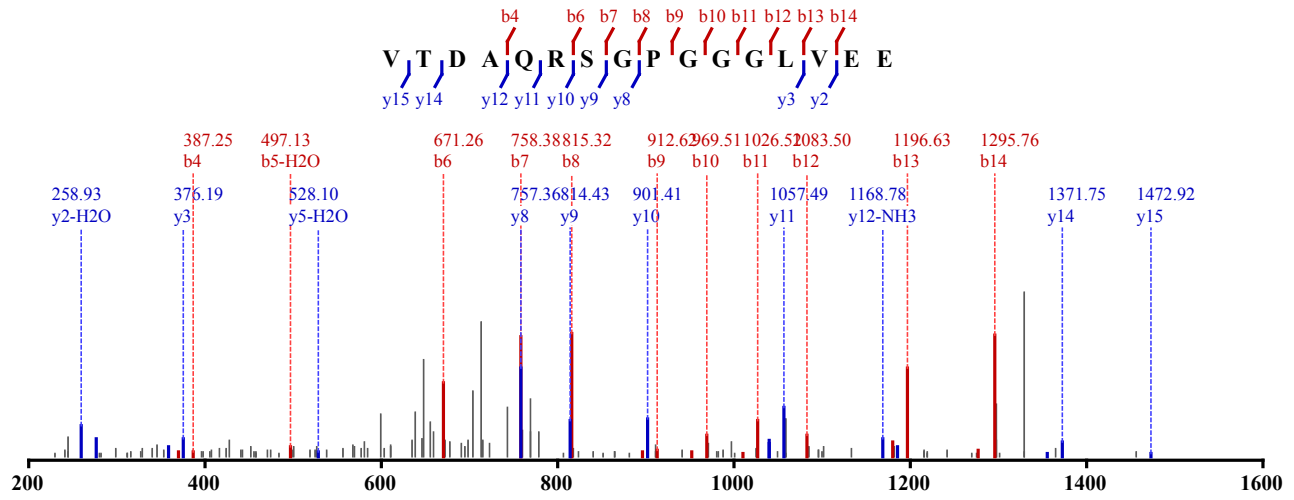

Not Modified

Identified in MSS482 with qvalue 0.00

Charge: 2, Exp. m/z: 786.386, Calc. m/z: 786.387

Data File: HeLa\_GluC\_pH6\_CID\_3xload, Scans: 11774 - 11774

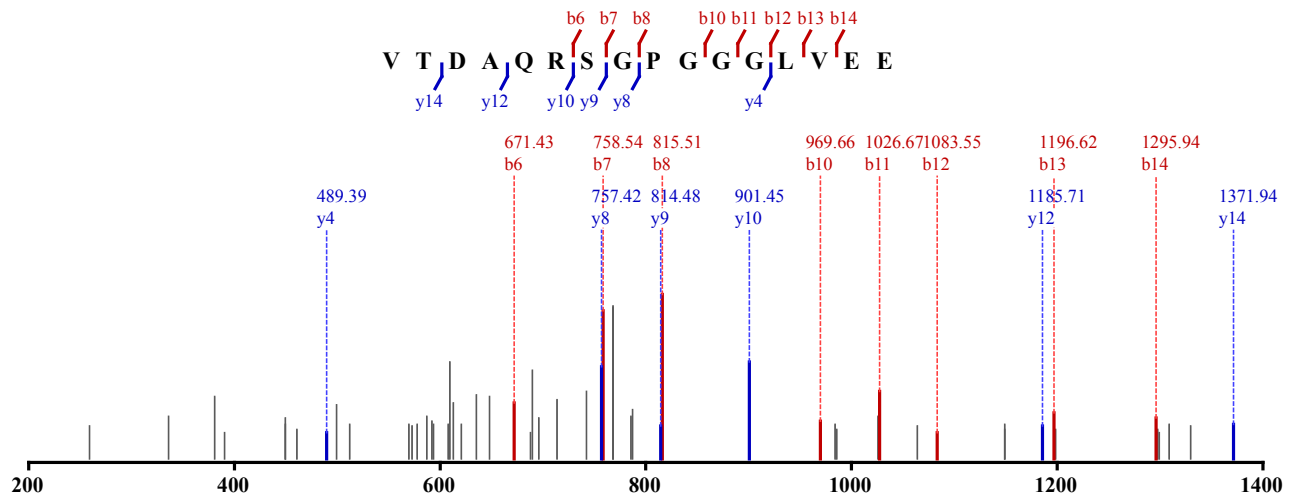

Not Modified

Identified in MSS482 with qvalue 0.00  
 Charge: 2, Exp. m/z: 786.388, Calc. m/z: 786.387  
 Data File: HeLa\_GluC\_pH8\_CID\_3xload\_3, Scans: 11758 - 11758

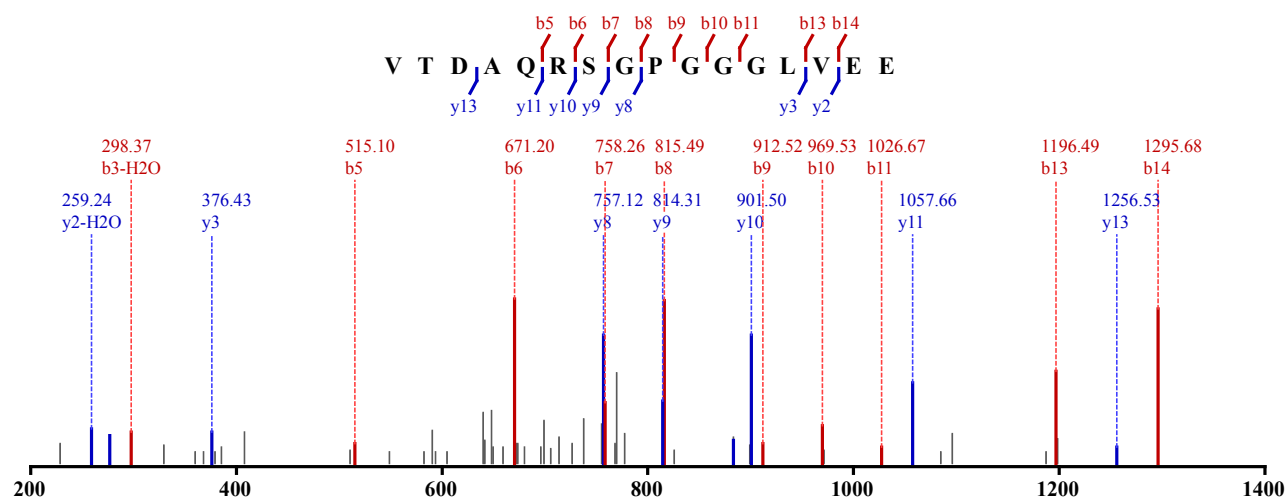

Not Modified  
 Identified in MSS482 with qvalue 0.00  
 Charge: 2, Exp. m/z: 786.387, Calc. m/z: 786.387  
 Data File: HeLa\_GluC\_pH8\_CID\_3xload, Scans: 12423 - 12423

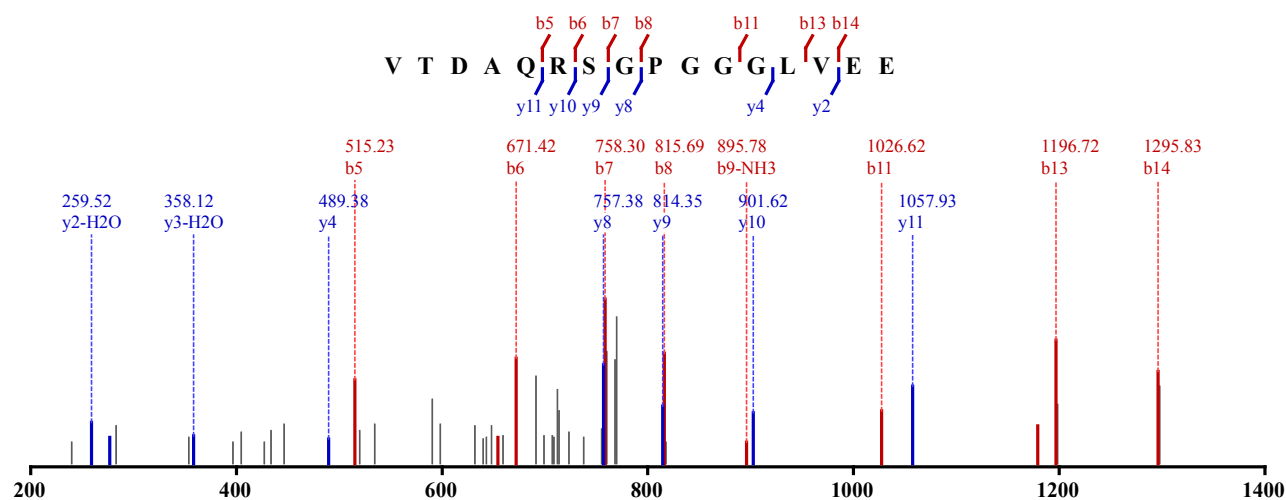

Not Modified  
 Identified in MSS482 with qvalue 0.00  
 Charge: 2, Exp. m/z: 786.387, Calc. m/z: 786.387  
 Data File: HeLa\_GluC\_pH11\_CID\_3xload\_2, Scans: 13997 - 13997

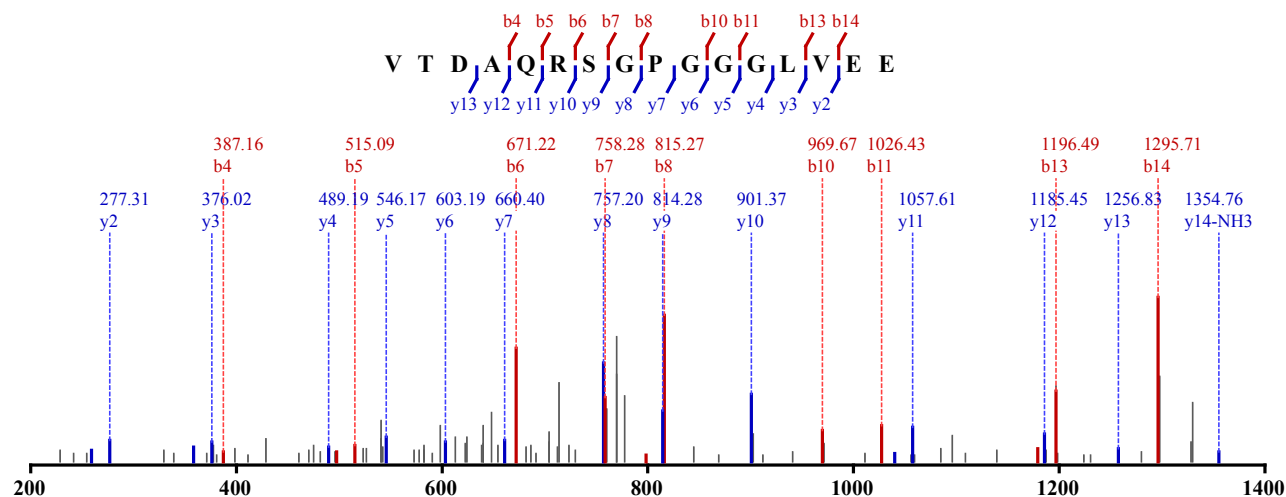

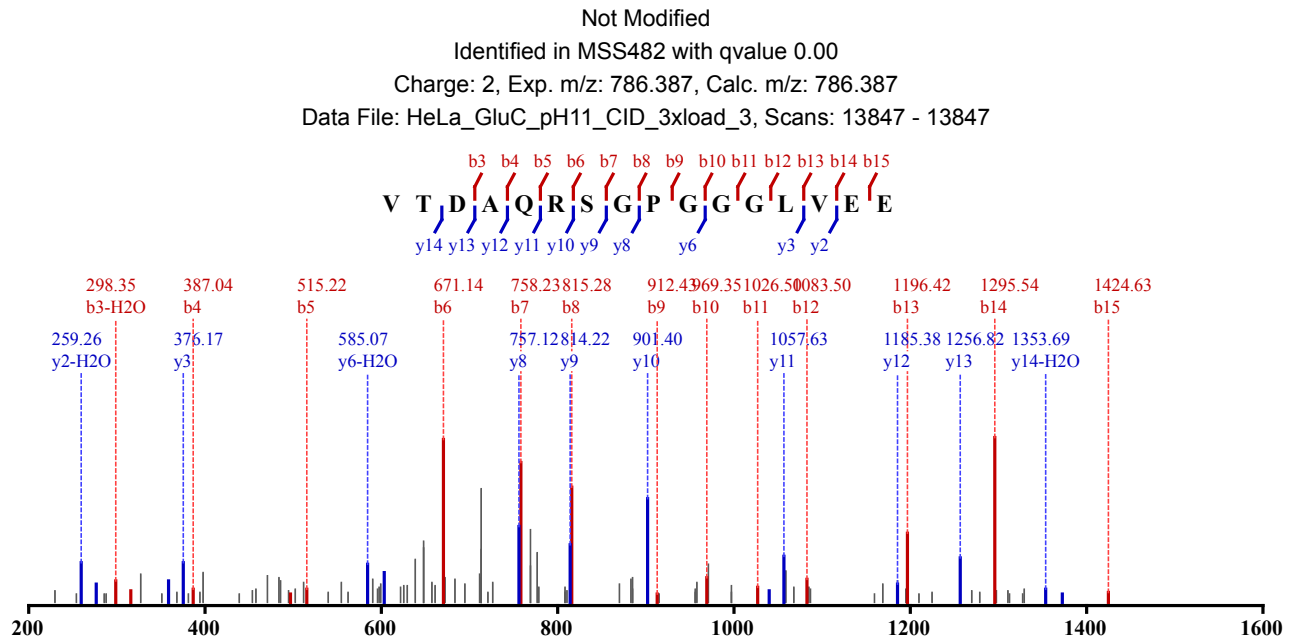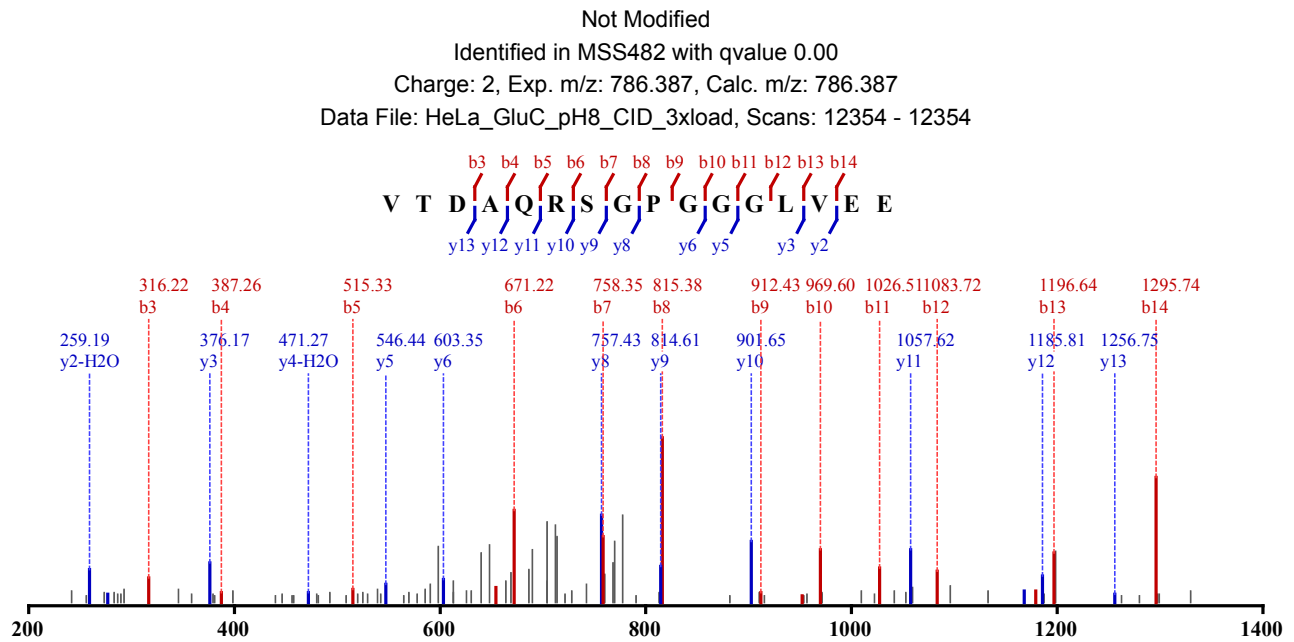

Not Modified  
 Identified in MSS486 with qvalue 0.00  
 Charge: 2, Exp. m/z: 786.386, Calc. m/z: 786.387  
 Data File: HeLa\_GluC\_pH11\_HCD\_3, Scans: 19241 - 19241

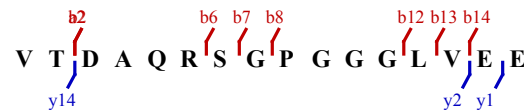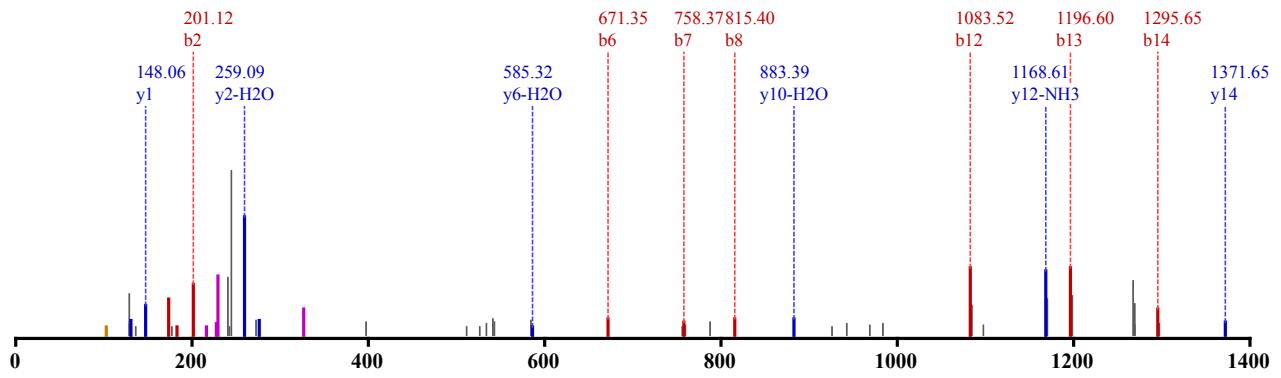

Not Modified

Identified in MSS486 with qvalue 0.00

Charge: 2, Exp. m/z: 786.384, Calc. m/z: 786.387

Data File: HeLa\_GluC\_pH8\_HCD\_1, Scans: 18015 - 18015

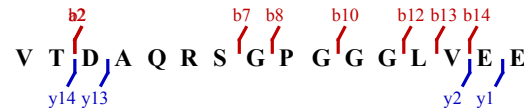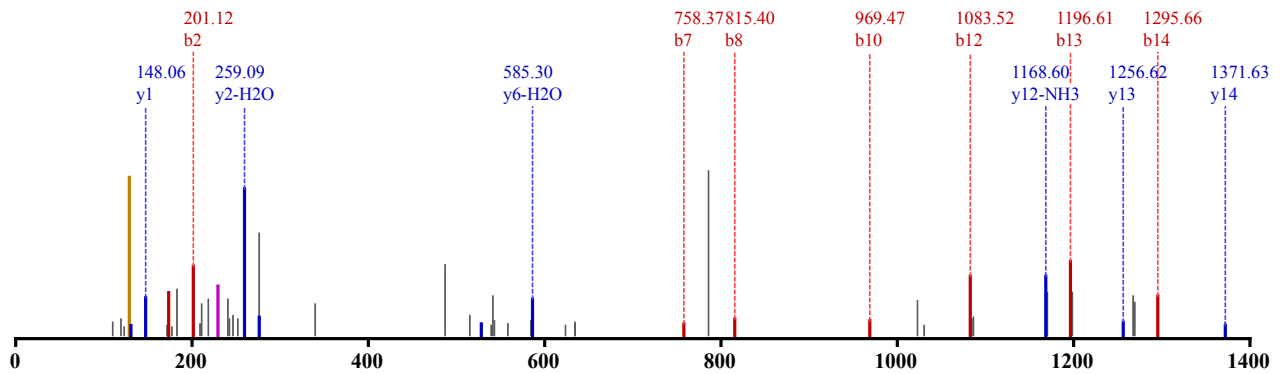

Not Modified

Identified in MSS486 with qvalue 0.00

Charge: 2, Exp. m/z: 786.386, Calc. m/z: 786.387

Data File: HeLa\_GluC\_pH8\_HCD\_2, Scans: 17934 - 17934

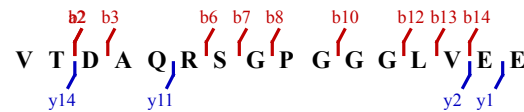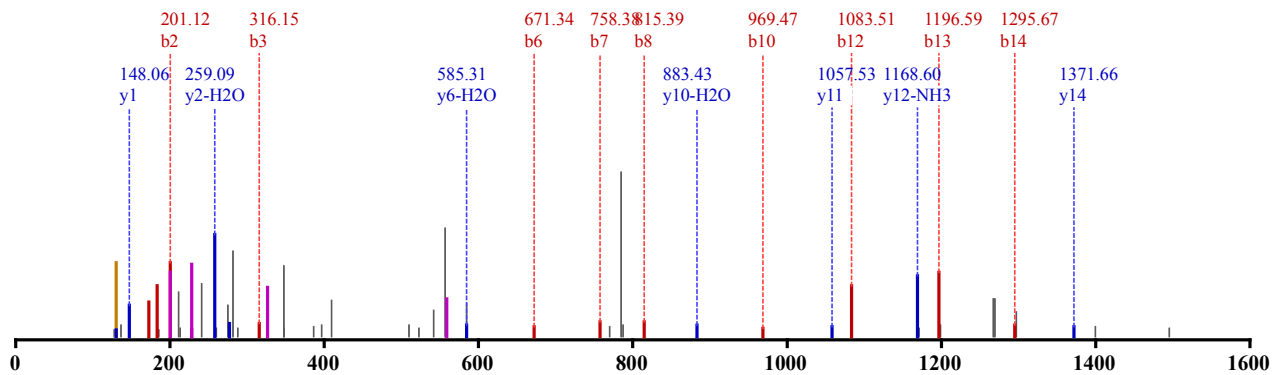

Not Modified

Identified in MSS481 with qvalue 0.00

Charge: 2, Exp. m/z: 684.390, Calc. m/z: 683.887



Data File: HeLa\_LysC\_pH11\_CID\_3xload\_3, Scans: 36087 - 36087

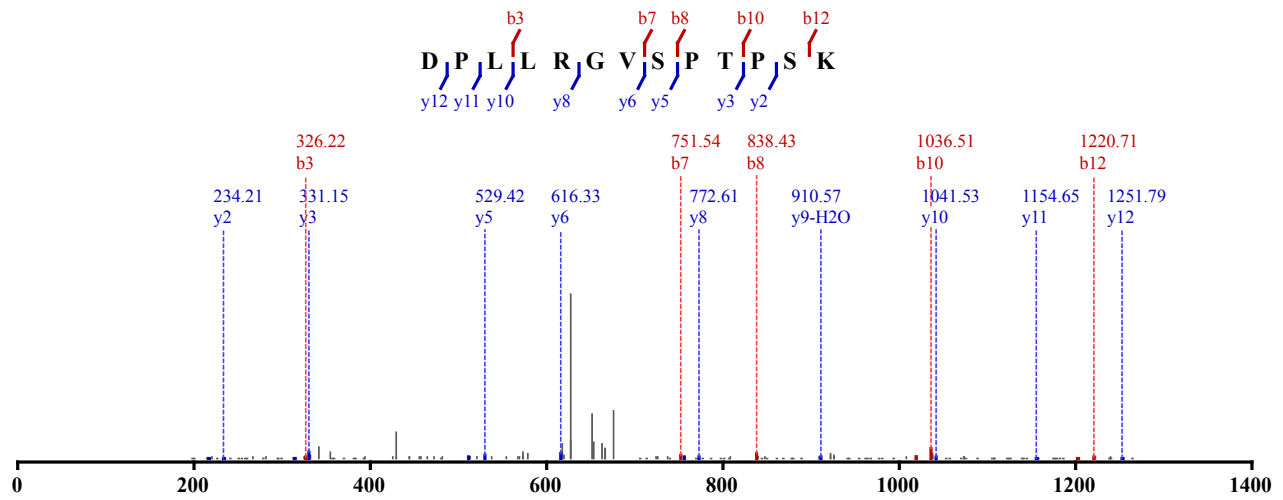

Not Modified

Identified in MSS481 with qvalue 0.00

Charge: 3, Exp. m/z: 456.262, Calc. m/z: 456.261

Data File: HeLa\_LysC\_pH11\_CID\_3xload\_3, Scans: 36060 - 36060

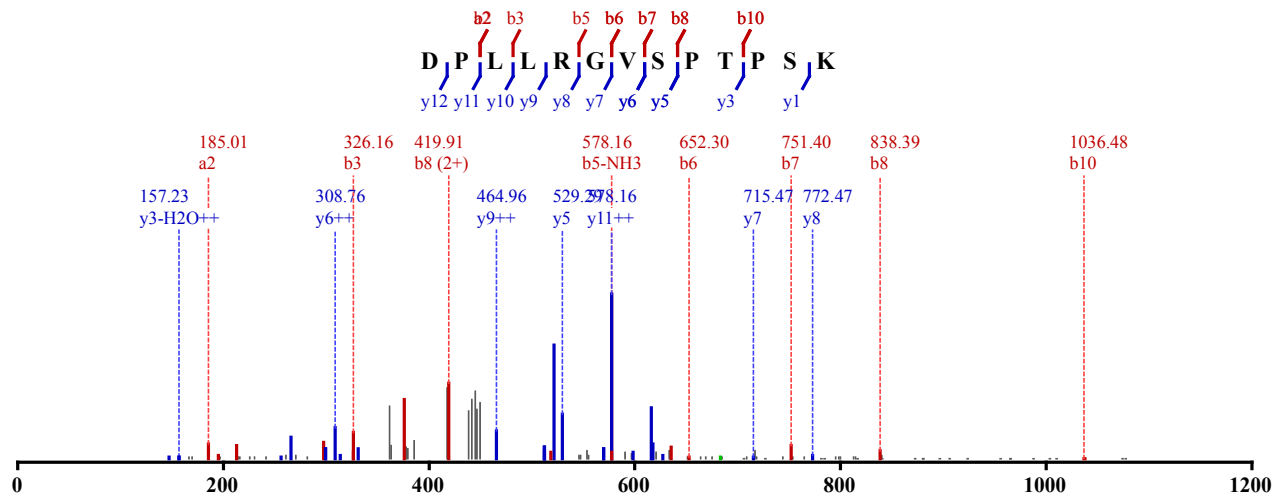

Not Modified

Identified in MSS485 with qvalue 0.00

Charge: 2, Exp. m/z: 683.887, Calc. m/z: 683.887

Data File: HeLa\_LysC\_pH11\_HCD\_2, Scans: 33063 - 33063

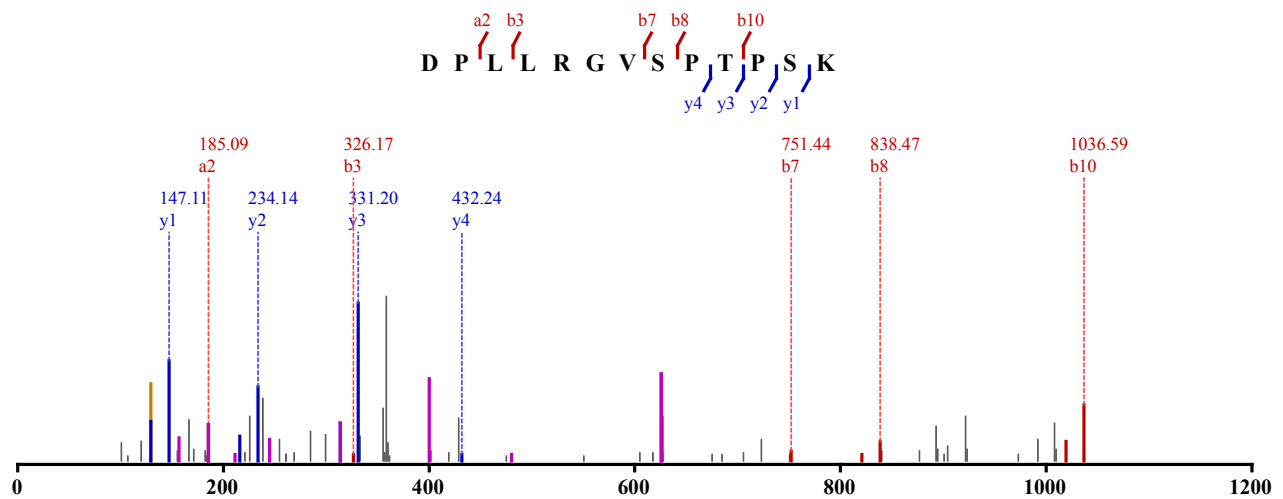

Not Modified

Identified in MSS485 with qvalue 0.00  
 Charge: 3, Exp. m/z: 456.260, Calc. m/z: 456.261  
 Data File: HeLa\_LysC\_pH11\_HCD\_2, Scans: 33012 - 33012

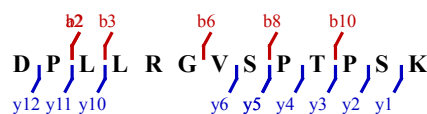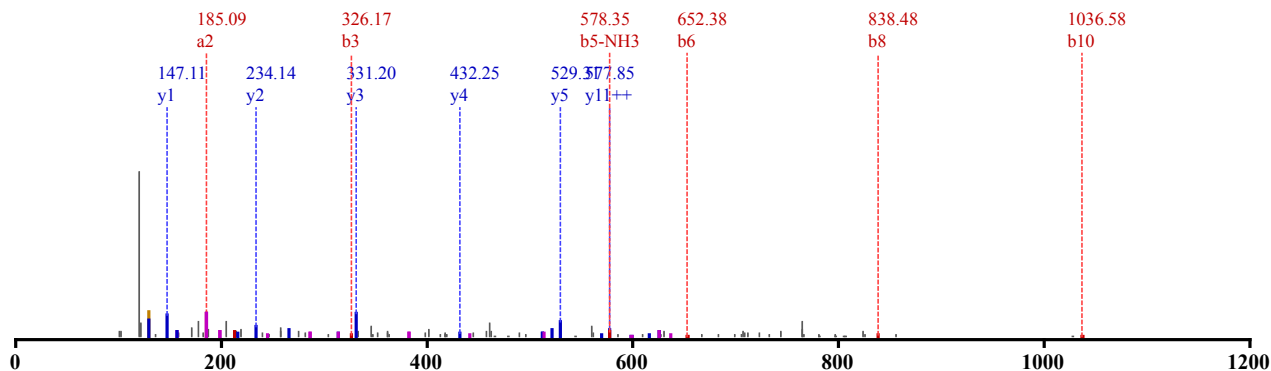

Not Modified  
 Identified in MSS485 with qvalue 0.00  
 Charge: 3, Exp. m/z: 456.261, Calc. m/z: 456.261  
 Data File: HeLa\_LysC\_pH11\_HCD\_3, Scans: 32118 - 32118

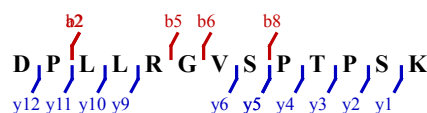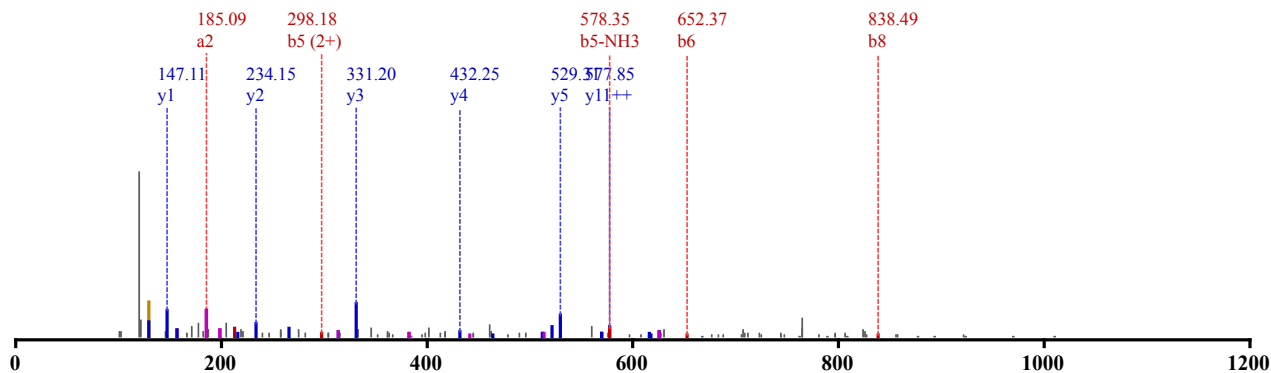

Not Modified  
 Identified in MSS30 with qvalue 0.00  
 Charge: 3, Exp. m/z: 526.292, Calc. m/z: 526.294  
 Data File: 20100611\_Velos1\_TaGe\_SA\_Hela\_4, Scans: 22268 - 22268

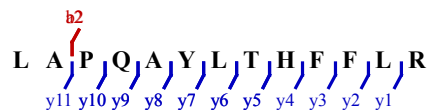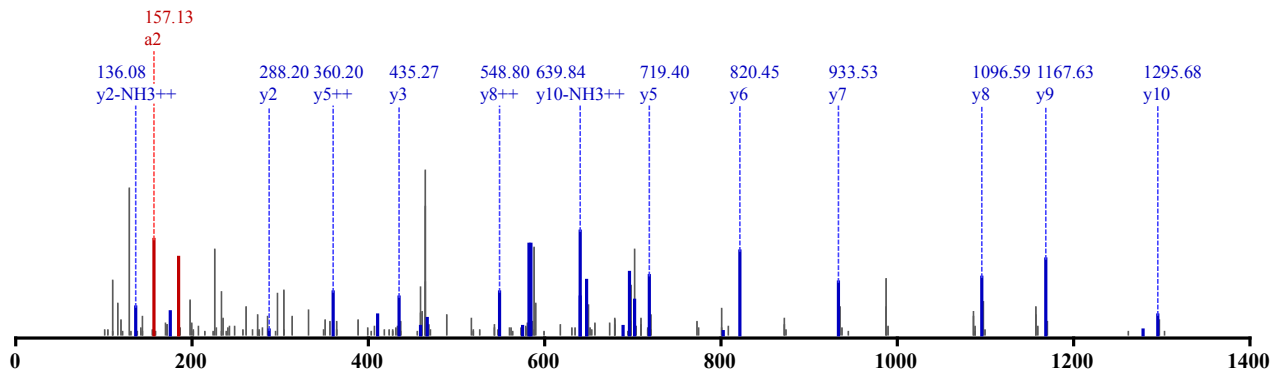

Not Modified  
 Identified in MSS484 with qvalue 0.00  
 Charge: 3, Exp. m/z: 526.293, Calc. m/z: 526.294  
 Data File: HeLa\_Try\_pH3\_HCD\_1, Scans: 50287 - 50287

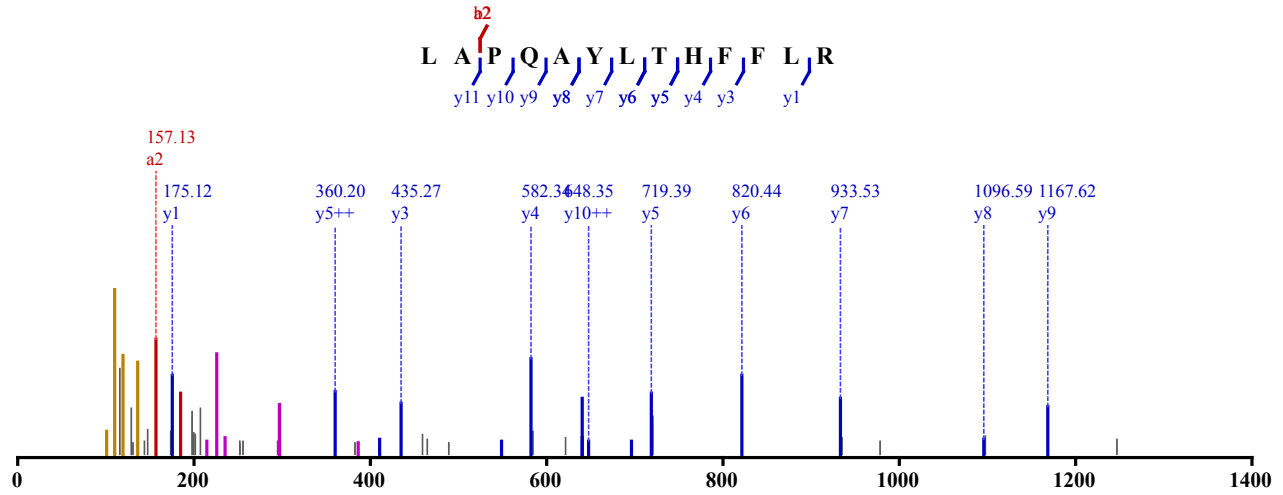

Not Modified  
 Identified in MSS484 with qvalue 0.00  
 Charge: 2, Exp. m/z: 555.784, Calc. m/z: 555.782  
 Data File: HeLa\_Try\_pH4\_HCD\_1, Scans: 43685 - 43685

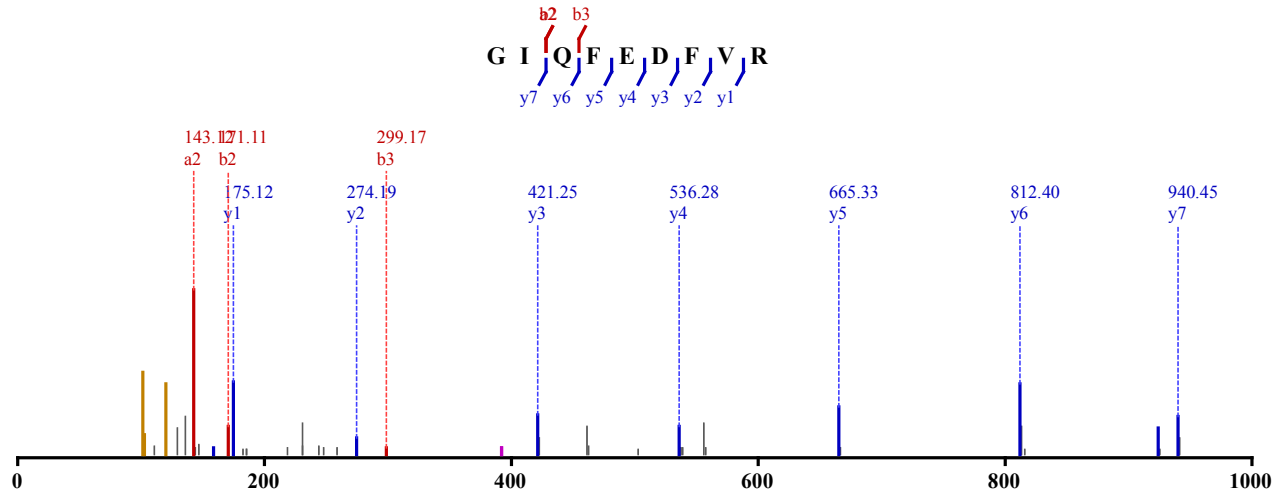

Not Modified  
 Identified in MSS484 with qvalue 0.00  
 Charge: 2, Exp. m/z: 555.783, Calc. m/z: 555.782  
 Data File: HeLa\_Try\_pH4\_HCD\_2, Scans: 41196 - 41196

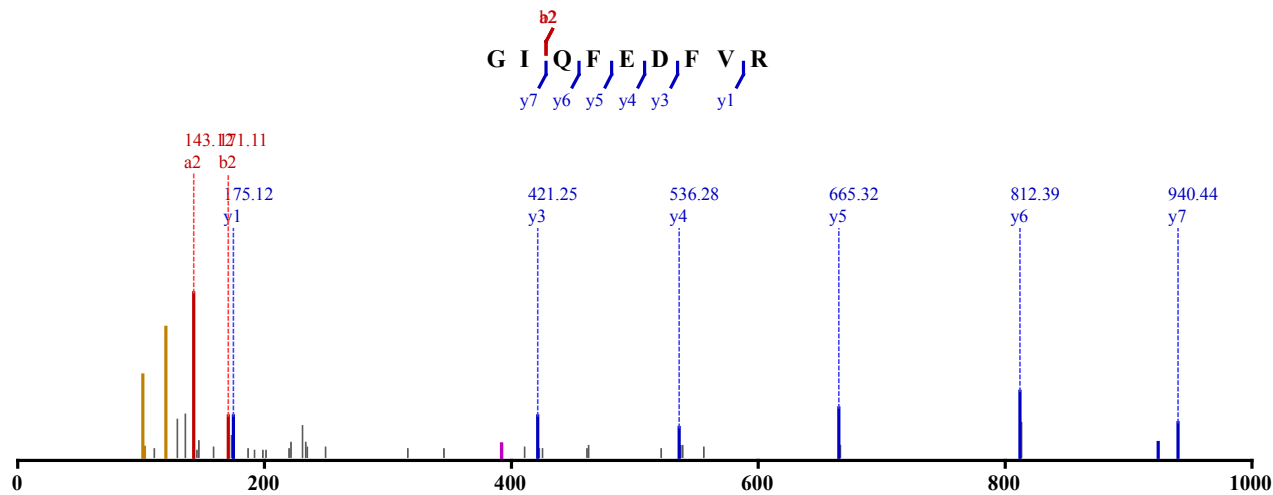

Not Modified  
 Identified in MSS484 with qvalue 0.00  
 Charge: 2, Exp. m/z: 555.783, Calc. m/z: 555.782  
 Data File: HeLa\_Try\_pH4\_HCD\_3, Scans: 39598 - 39598

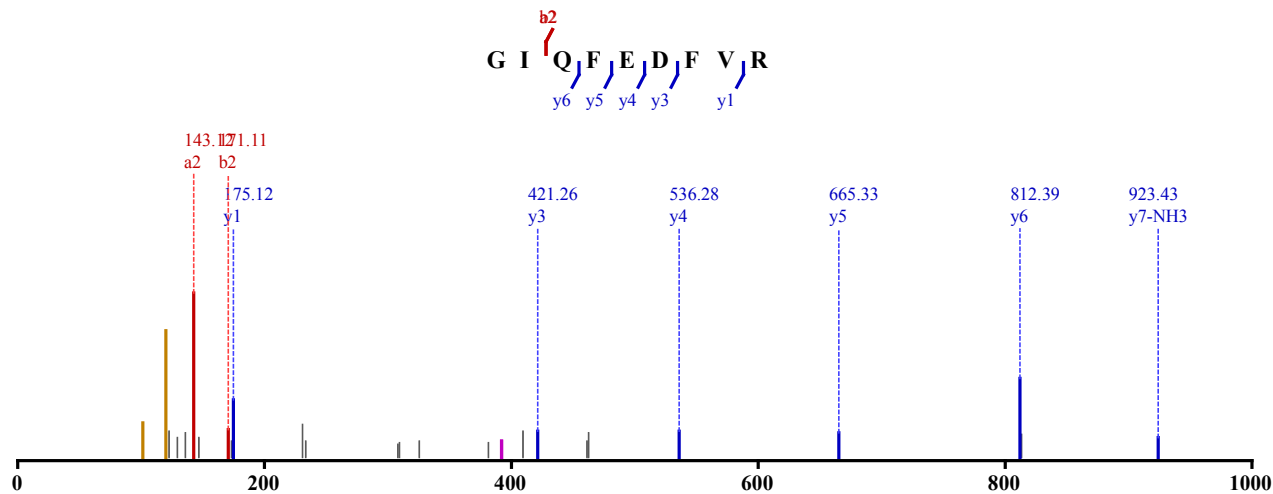

Not Modified  
 Identified in MSS480 with qvalue 0.00  
 Charge: 2, Exp. m/z: 848.403, Calc. m/z: 848.402  
 Data File: HeLa\_try\_pH8\_CID\_3xload\_3, Scans: 46512 - 46512

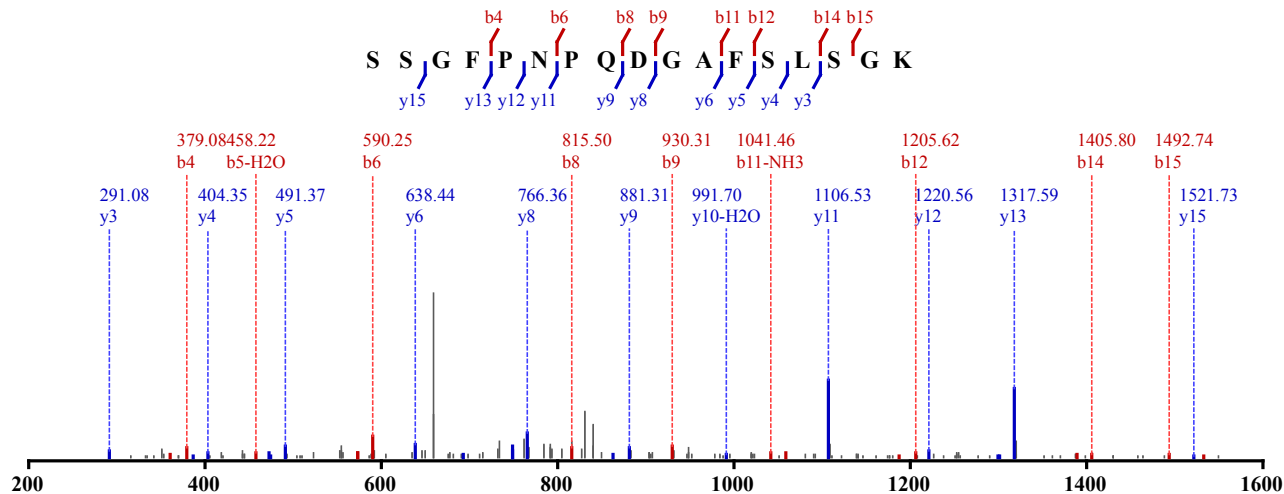

Not Modified  
 Identified in MSS484 with qvalue 0.00  
 Charge: 2, Exp. m/z: 848.401, Calc. m/z: 848.402

Data File: HeLa\_Try\_pH8\_HCD\_3, Scans: 44600 - 44600

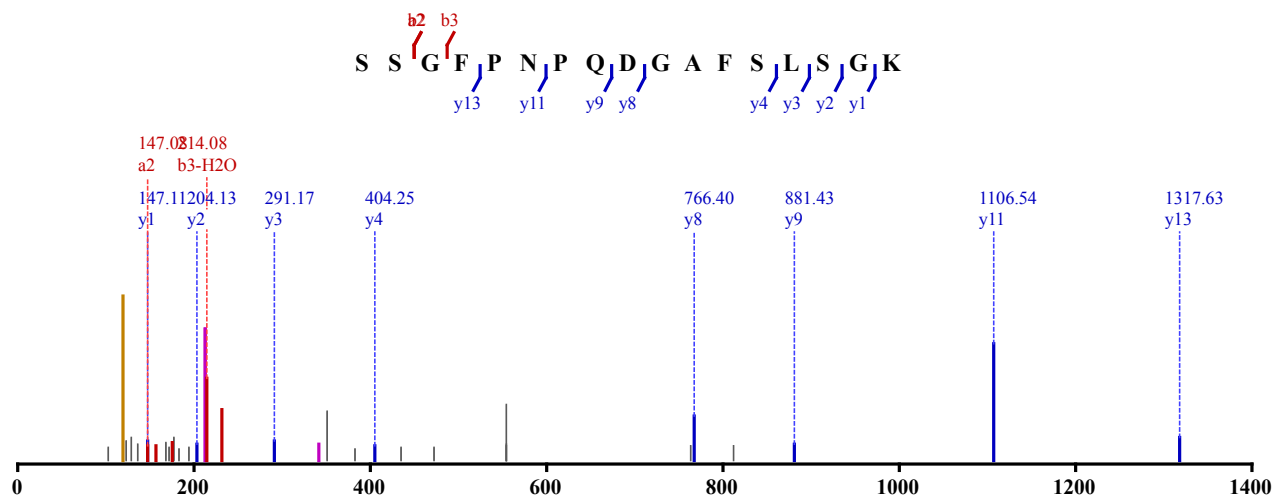

Not Modified

Identified in MSS484 with qvalue 0.00

Charge: 2, Exp. m/z: 848.400, Calc. m/z: 848.402

Data File: HeLa\_Try\_pH8\_HCD\_1, Scans: 47978 - 47978

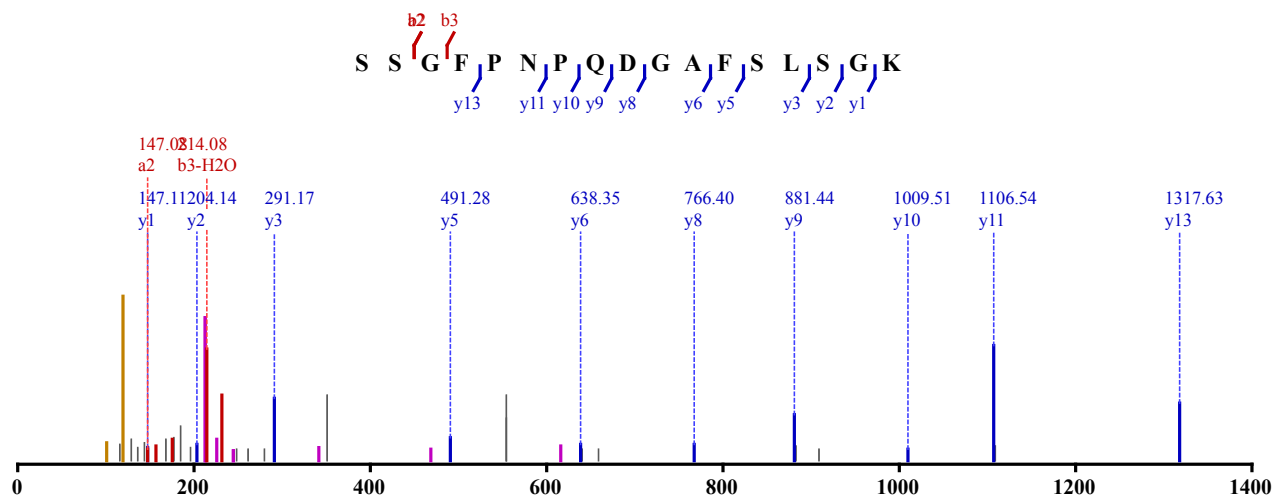

Not Modified

Identified in MSS479 with qvalue 0.00

Charge: 2, Exp. m/z: 636.831, Calc. m/z: 636.832

Data File: HeLa\_AspN\_pH11\_HCD\_1, Scans: 24218 - 24218

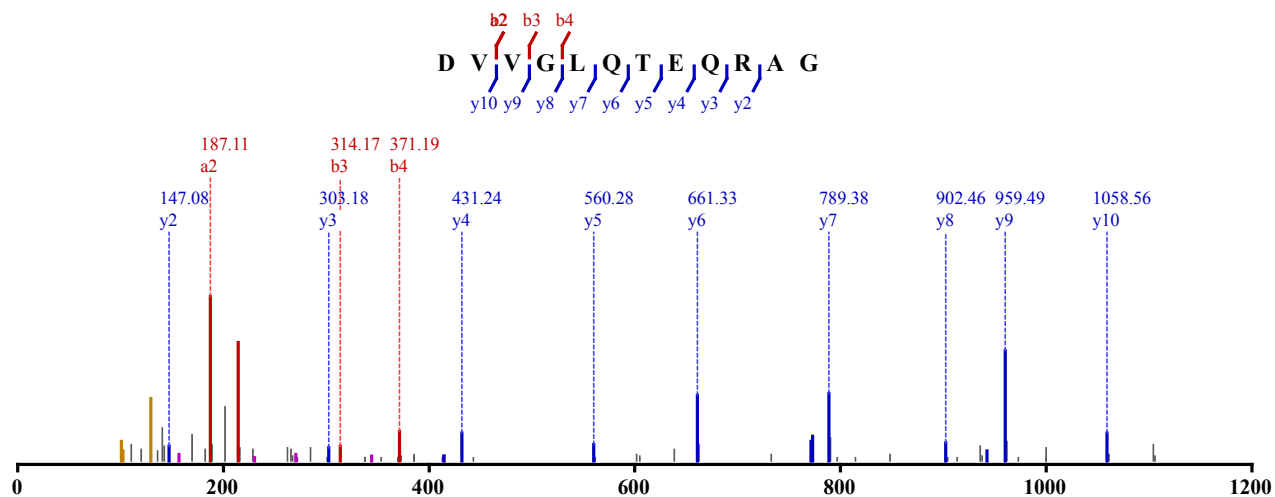

Not Modified

Identified in MSS479 with qvalue 0.00  
 Charge: 2, Exp. m/z: 636.831, Calc. m/z: 636.832  
 Data File: HeLa\_AspN\_pH11\_HCD\_2, Scans: 22834 - 22834

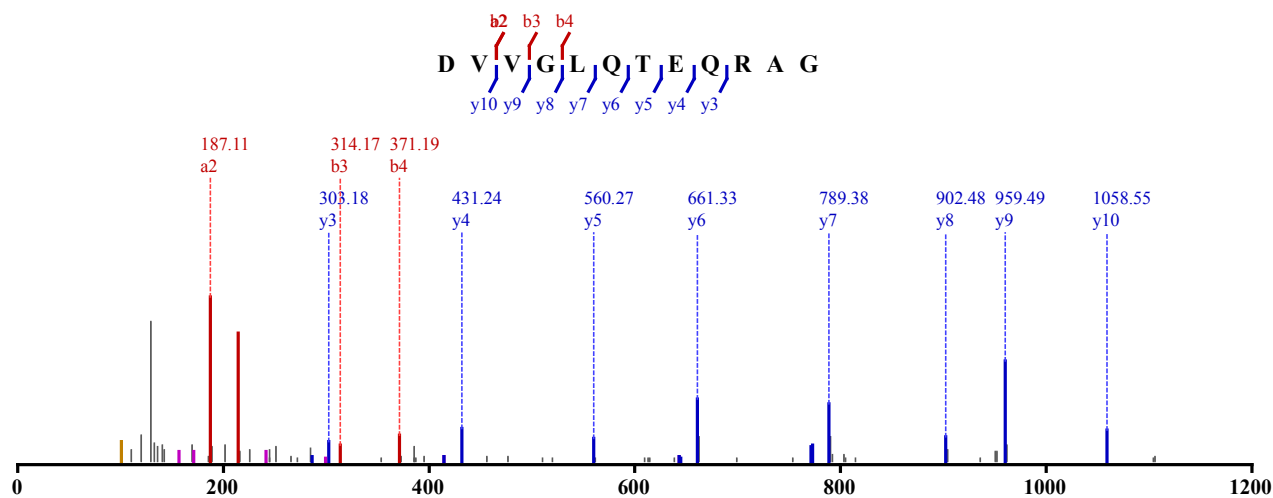

Not Modified  
 Identified in MSS479 with qvalue 0.00  
 Charge: 2, Exp. m/z: 636.830, Calc. m/z: 636.832  
 Data File: HeLa\_AspN\_pH11\_HCD\_3, Scans: 22311 - 22311

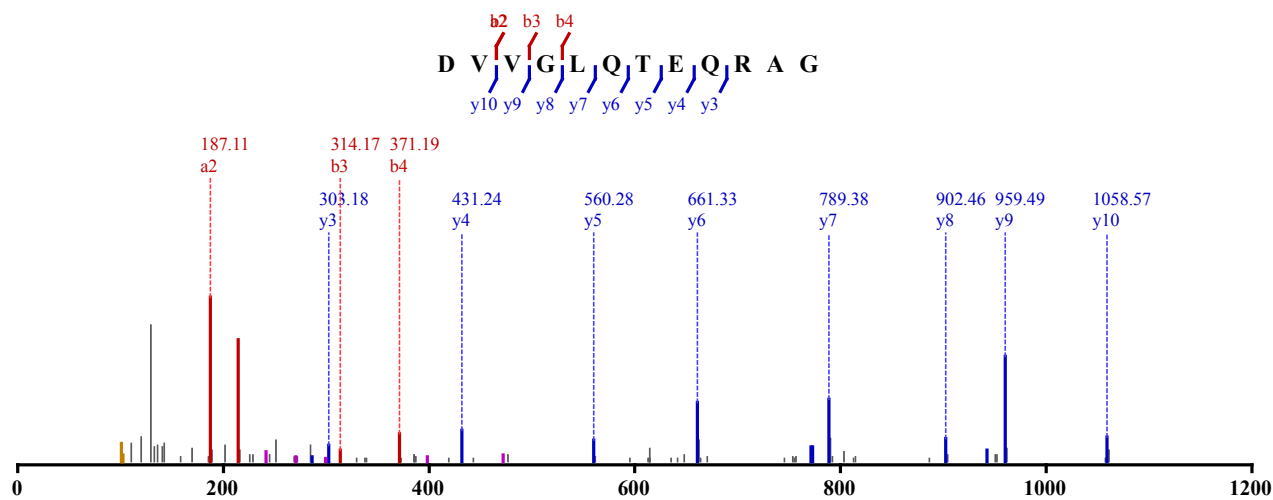

Not Modified  
 Identified in MSS88 with qvalue 0.00  
 Charge: 2, Exp. m/z: 657.867, Calc. m/z: 657.862  
 Data File: HeLa\_elastase-try\_CID\_1, Scans: 47970 - 47970

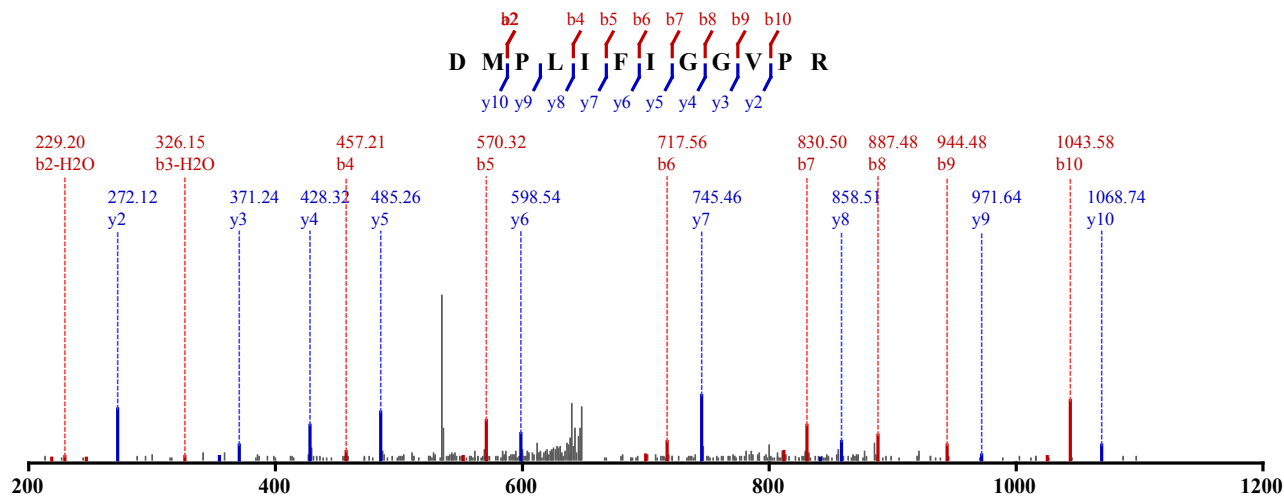

Not Modified

Identified in MSS100 with qvalue 0.00

Charge: 2, Exp. m/z: 657.866, Calc. m/z: 657.862

Data File: HeLa\_GluC-Try\_CID\_1, Scans: 47491 - 47491

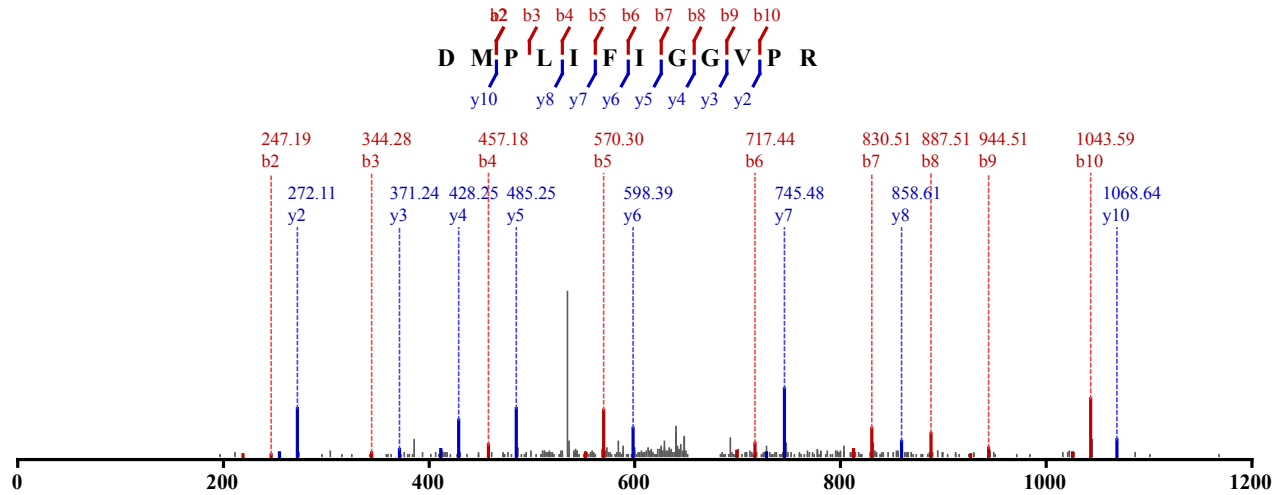

Not Modified

Identified in MSS110 with qvalue 0.00

Charge: 2, Exp. m/z: 657.865, Calc. m/z: 657.862

Data File: HeLa\_LysC-try\_CID\_1, Scans: 47520 - 47520

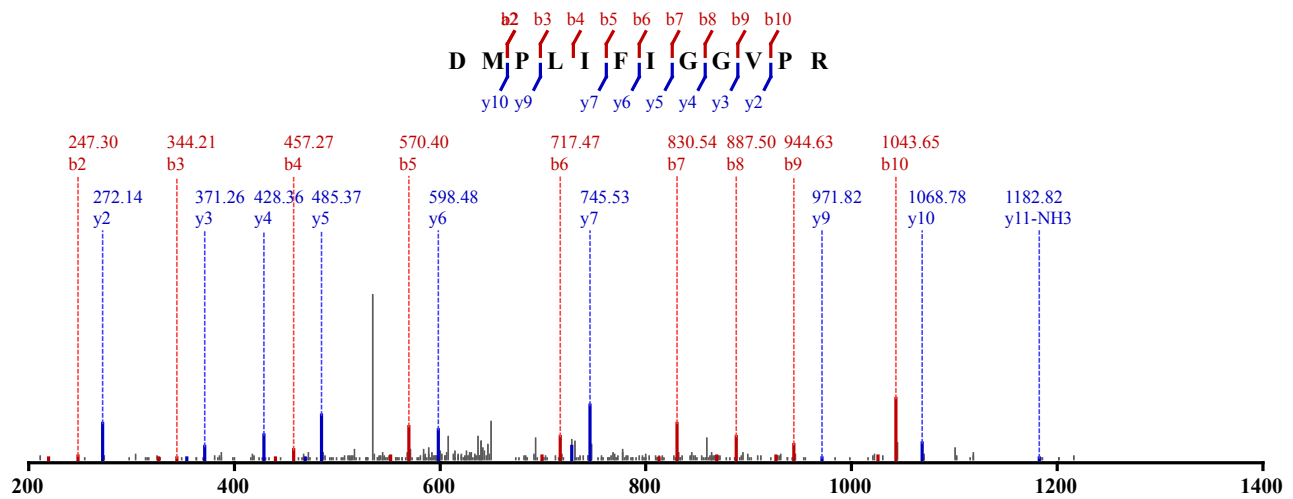

Not Modified

Identified in MSS113 with qvalue 0.00

Charge: 2, Exp. m/z: 657.862, Calc. m/z: 657.862

Data File: HeLa\_try\_CID\_1, Scans: 47333 - 47333

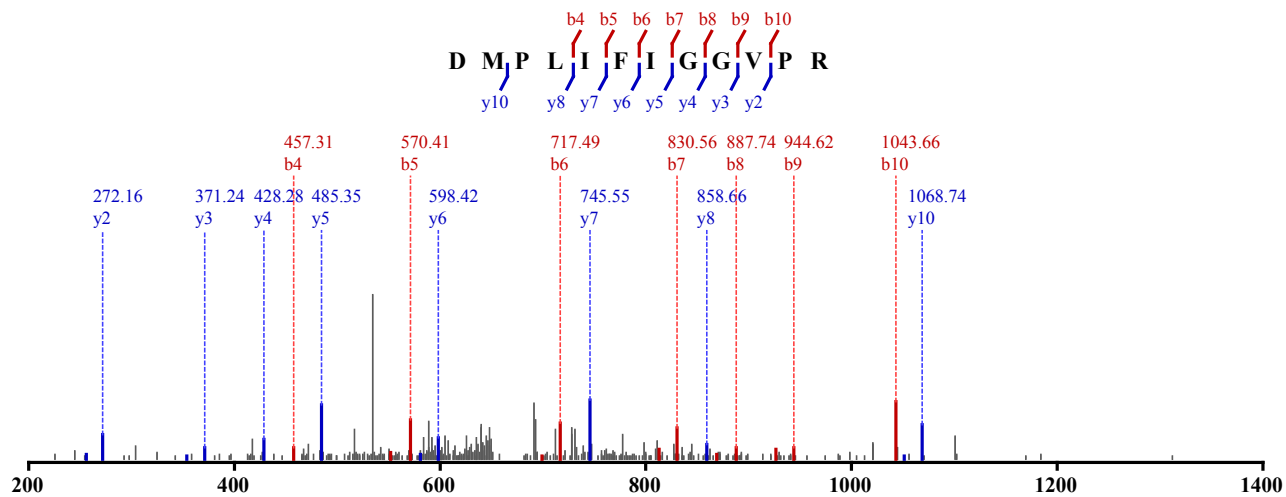

Not Modified

Identified in MSS134 with qvalue 0.00

Charge: 2, Exp. m/z: 657.866, Calc. m/z: 657.867

Data File: HeLa\_GluC-try\_HCD\_2, Scans: 51465 - 51465

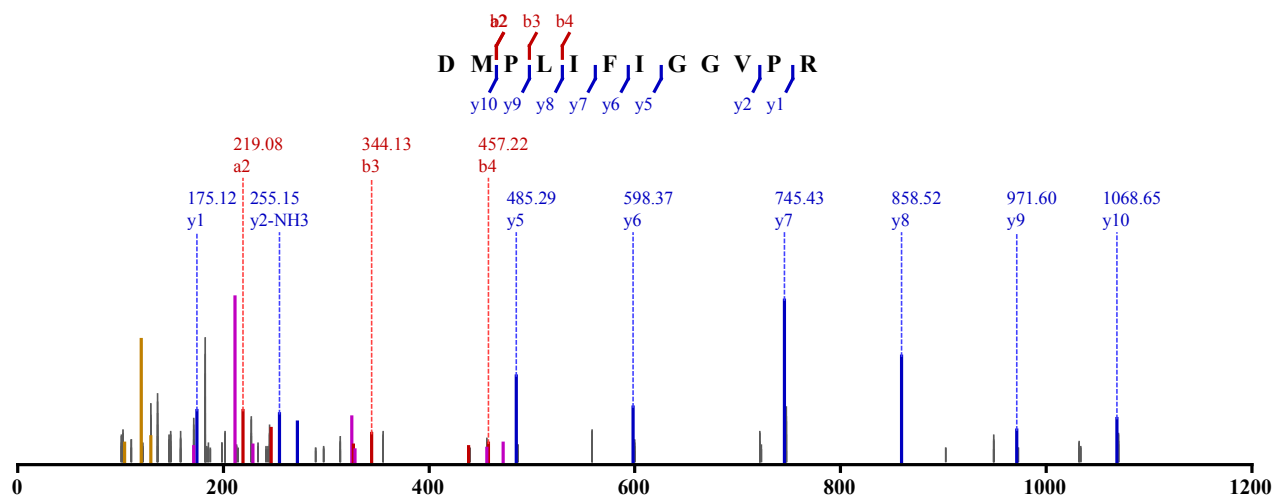

Not Modified

Identified in MSS138 with qvalue 0.00

Charge: 2, Exp. m/z: 657.866, Calc. m/z: 657.862

Data File: HeLa\_elastase-try\_HCD\_1, Scans: 49516 - 49516

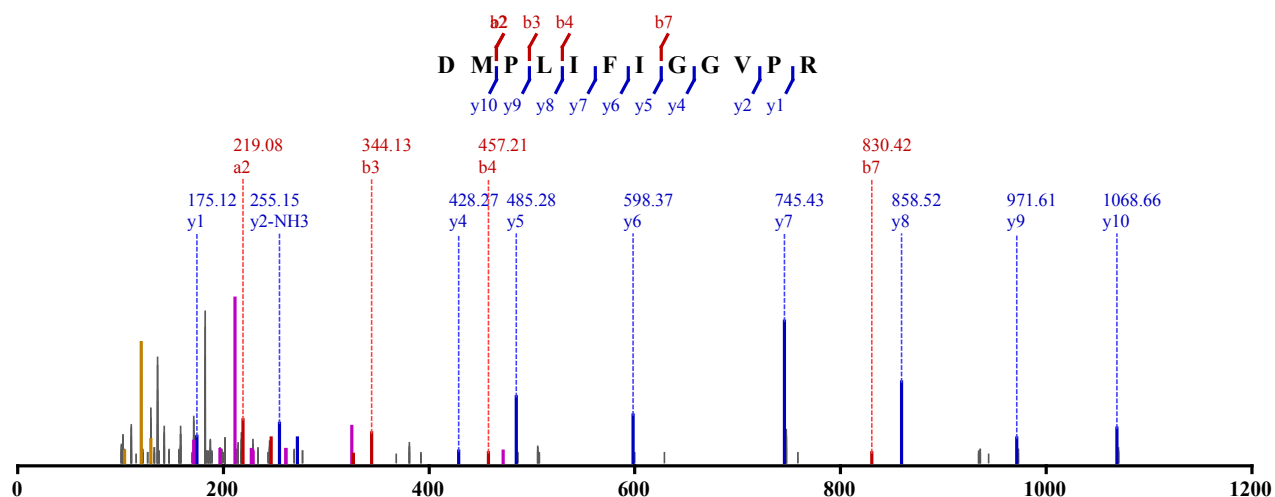

Not Modified

Identified in MSS251 with qvalue 0.00

Charge: 2, Exp. m/z: 657.863, Calc. m/z: 657.862



Data File: HeLa\_elastase-try\_CID-ETD\_2, Scans: 33024 - 33024

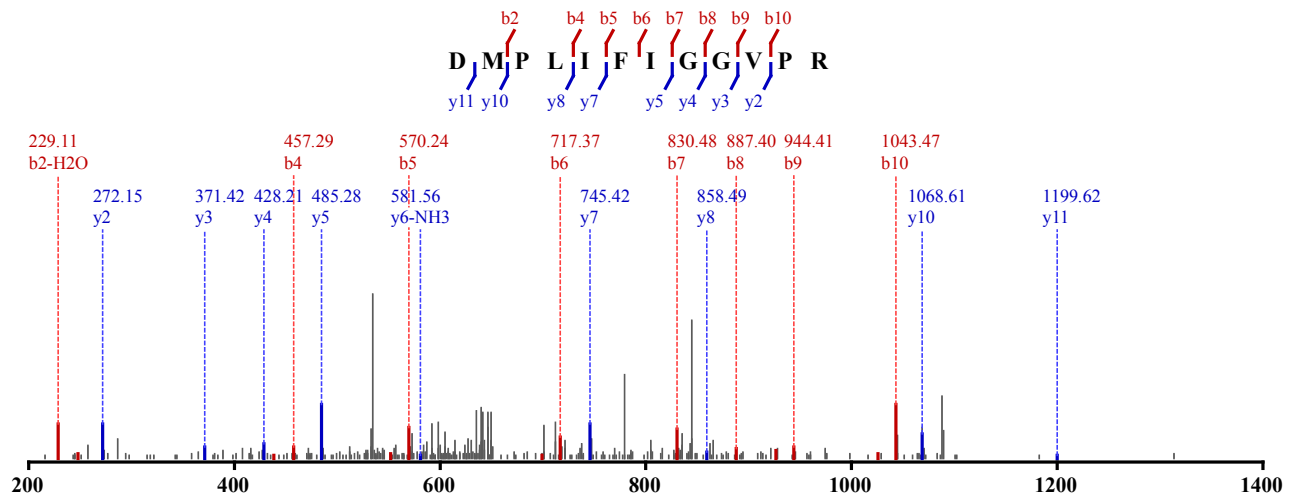

Not Modified

Identified in MSS434 with qvalue 0.00

Charge: 2, Exp. m/z: 657.866, Calc. m/z: 657.862

Data File: HeLa\_LysC-try\_CID-ETD\_1, Scans: 32958 - 32958

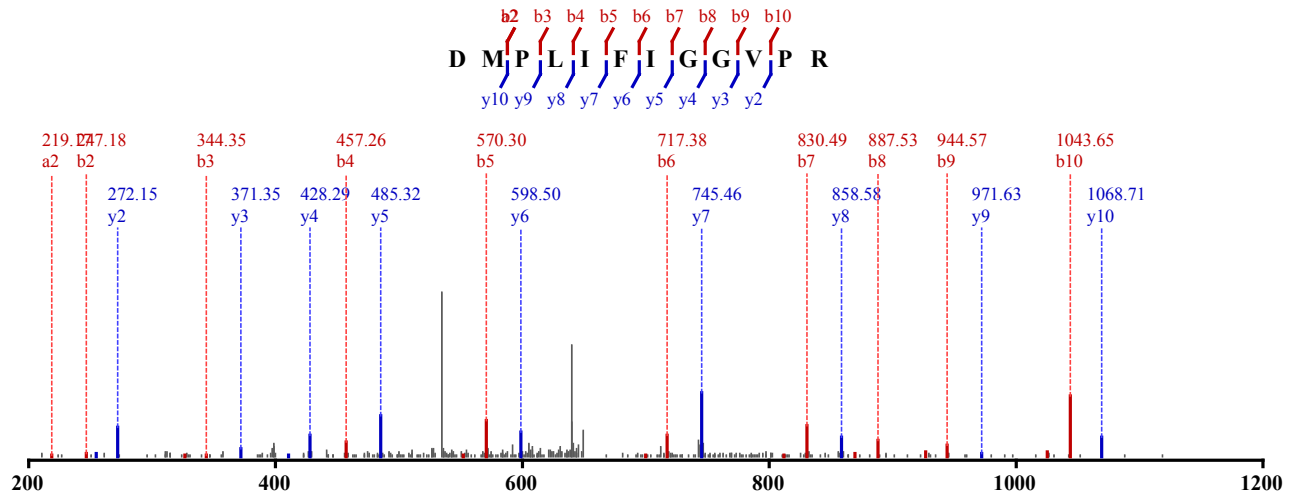

Not Modified

Identified in MSS434 with qvalue 0.00

Charge: 2, Exp. m/z: 657.862, Calc. m/z: 657.862

Data File: HeLa\_LysC-try\_CID-ETD\_2, Scans: 30113 - 30113

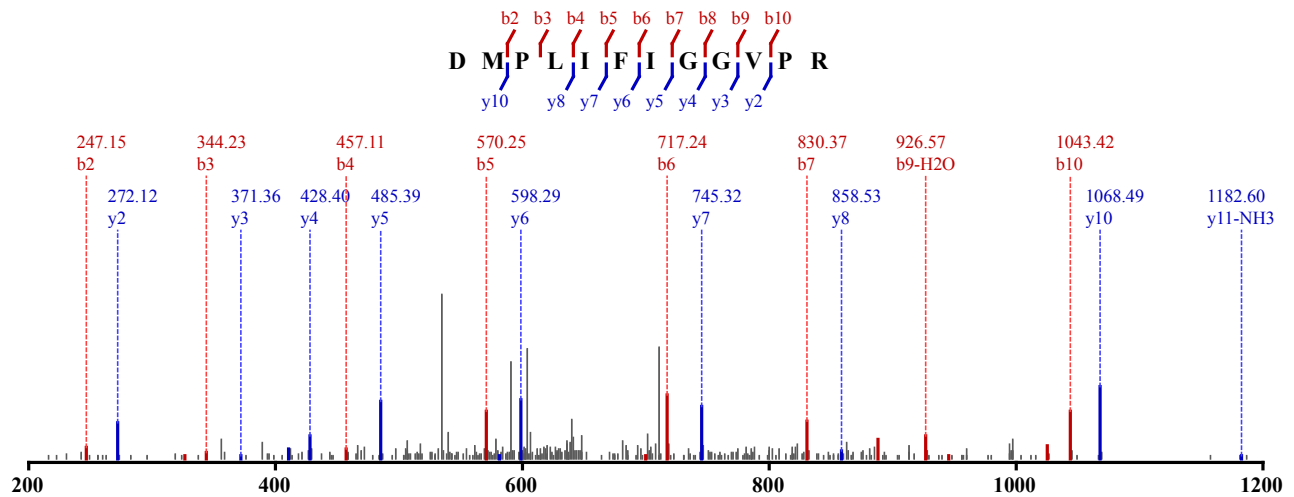

1 x Oxidation (M)

Identified in MSS480 with qvalue 0.00

Charge: 2, Exp. m/z: 665.863, Calc. m/z: 665.862

Data File: HeLa\_try\_pH11\_CID\_3xload\_2, Scans: 58176 - 58176

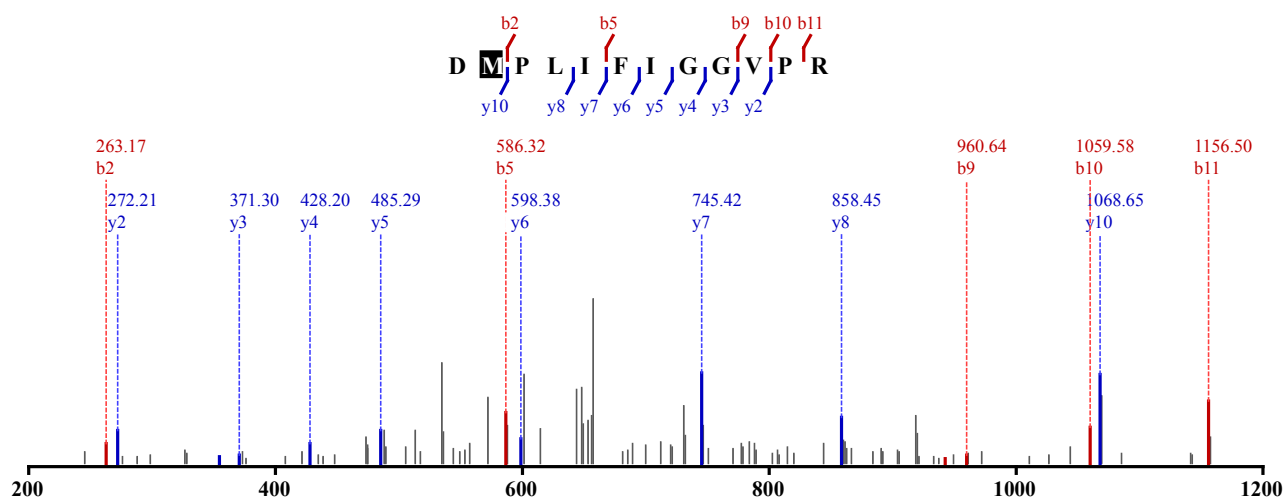

1 x Oxidation (M)

Identified in MSS480 with qvalue 0.00

Charge: 2, Exp. m/z: 666.865, Calc. m/z: 665.862

Data File: HeLa\_try\_pH11\_CID\_3xload\_3, Scans: 64214 - 64214

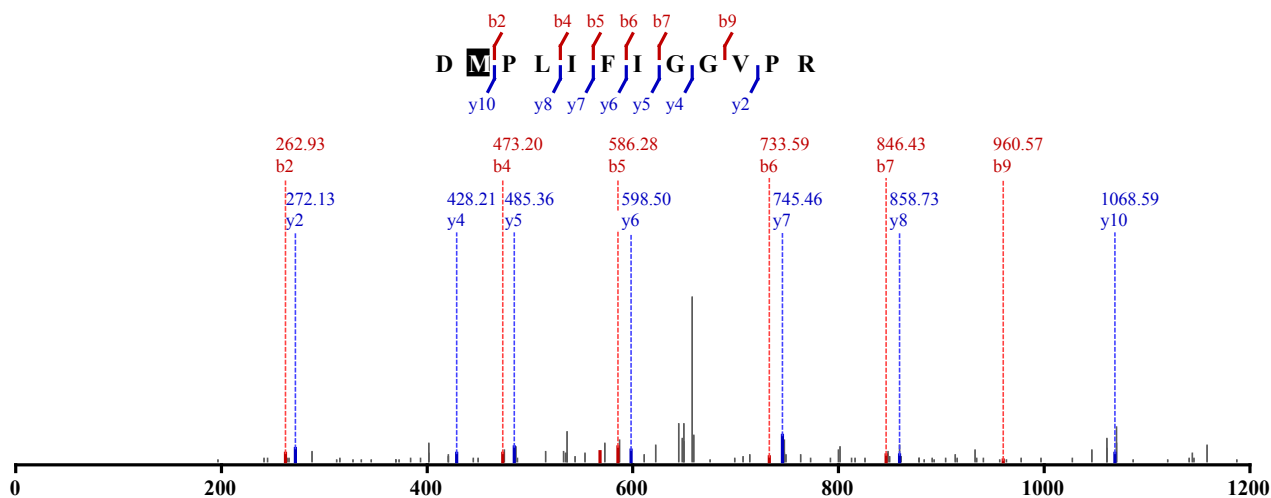

1 x Oxidation (M)

Identified in MSS480 with qvalue 0.00

Charge: 2, Exp. m/z: 665.863, Calc. m/z: 665.862

Data File: HeLa\_try\_pH11\_CID\_3xload\_3, Scans: 64255 - 64255

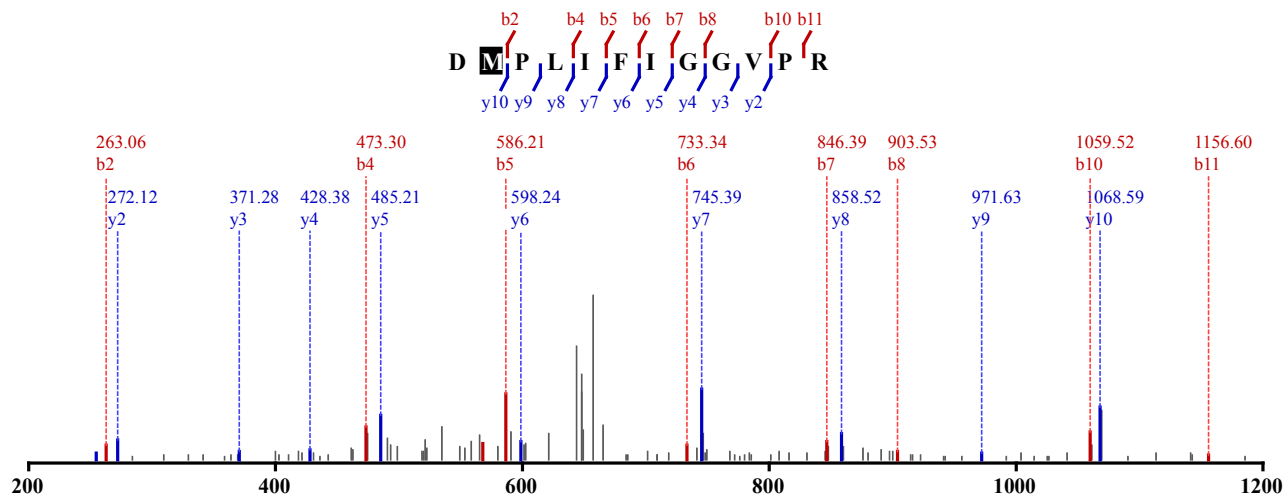

1 x Oxidation (M)  
 Identified in MSS480 with qvalue 0.00  
 Charge: 2, Exp. m/z: 665.839, Calc. m/z: 665.862  
 Data File: HeLa\_try\_pH11\_CID\_3xload\_2, Scans: 58391 - 58391

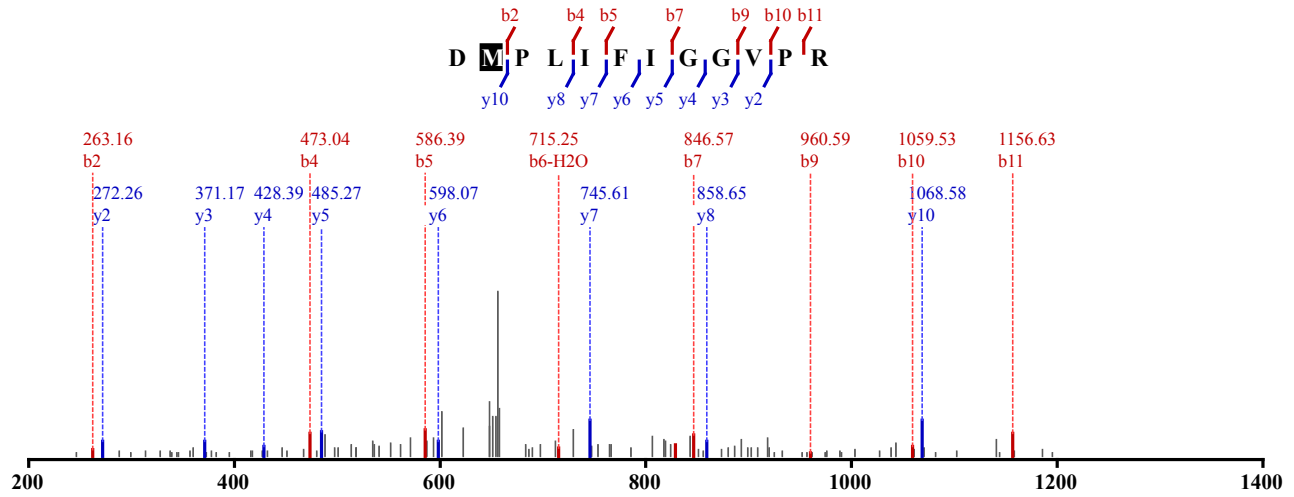

1 x Oxidation (M)  
 Identified in MSS480 with qvalue 0.00  
 Charge: 2, Exp. m/z: 665.841, Calc. m/z: 665.862  
 Data File: HeLa\_try\_pH11\_CID\_3xload, Scans: 52828 - 52828

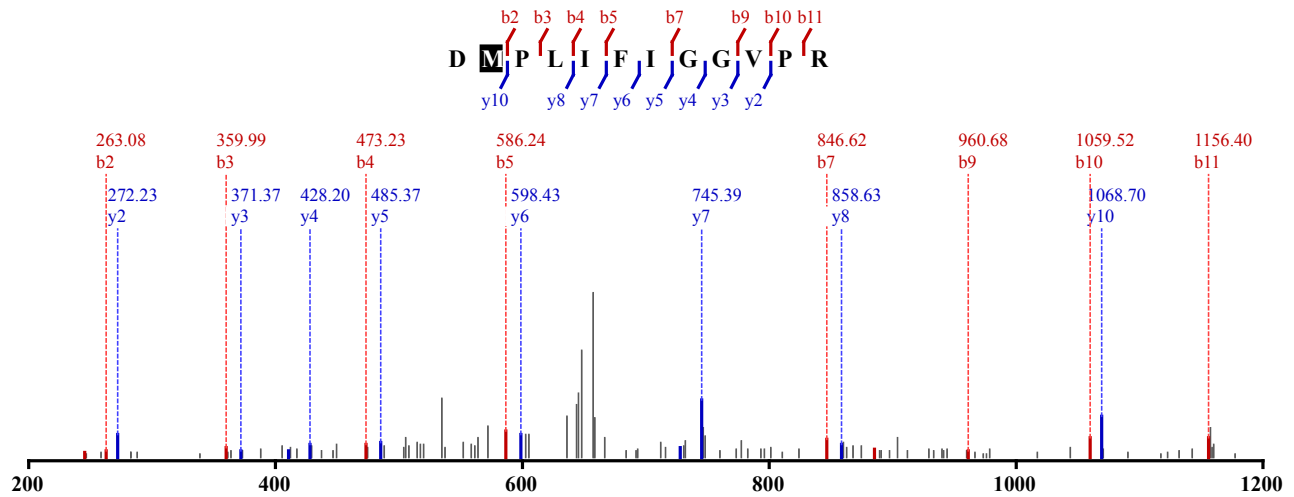

Not Modified  
 Identified in MSS105 with qvalue 0.00  
 Charge: 3, Exp. m/z: 693.362, Calc. m/z: 693.027  
 Data File: HeLa\_LysC\_CID\_1, Scans: 52637 - 52637

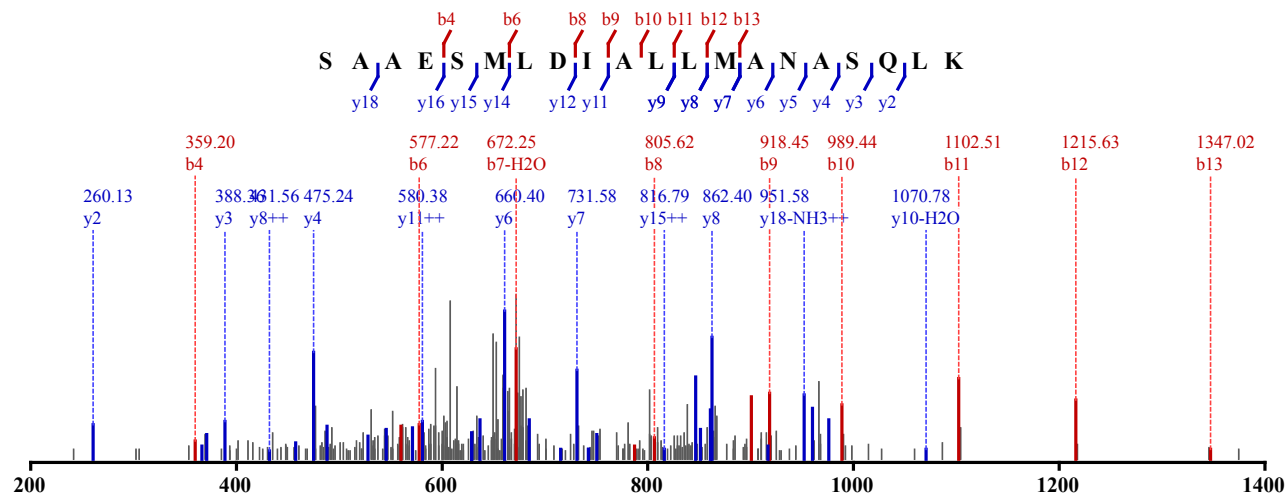

Not Modified

Identified in MSS122 with qvalue 0.00

Charge: 2, Exp. m/z: 1121.530, Calc. m/z: 1121.532

Data File: HeLa\_try\_HCD\_2, Scans: 40026 - 40026

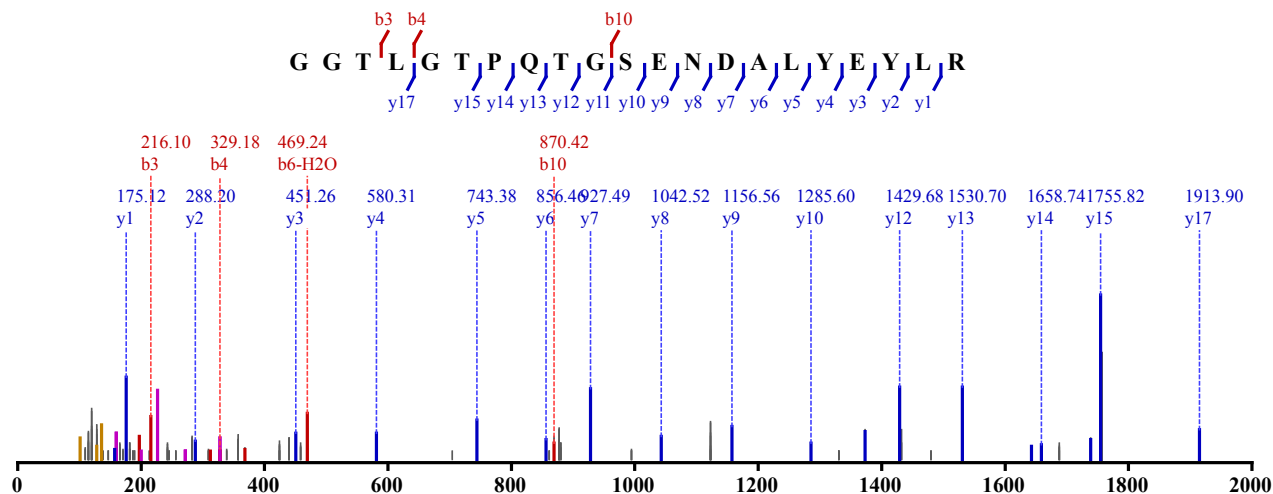

Not Modified

Identified in MSS480 with qvalue 0.00

Charge: 3, Exp. m/z: 712.006, Calc. m/z: 712.007

Data File: HeLa\_try\_pH5\_CID\_3xload\_3, Scans: 24474 - 24474

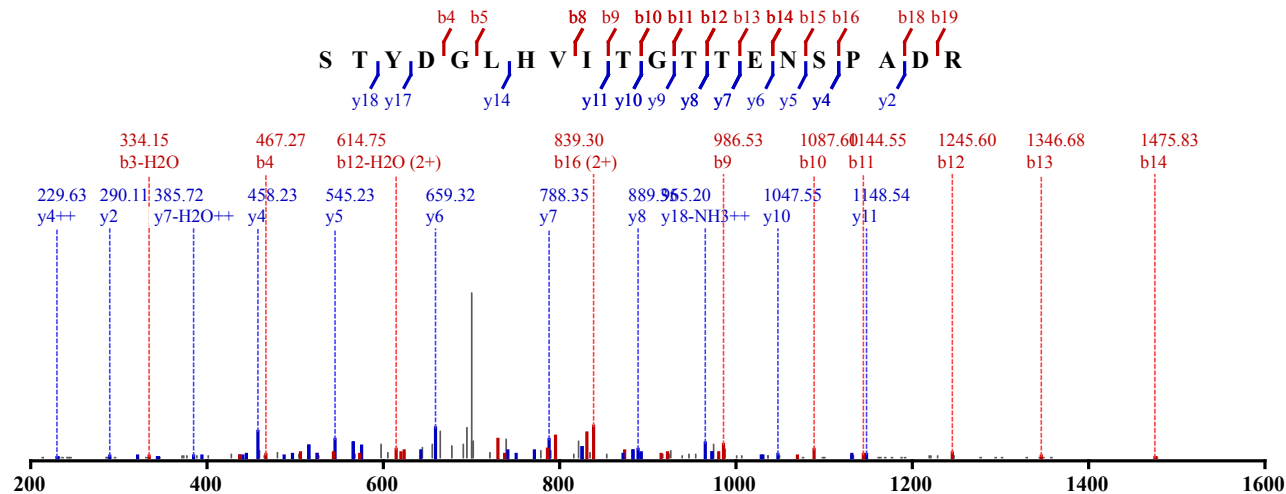

Not Modified

Identified in MSS480 with qvalue 0.00

Charge: 3, Exp. m/z: 712.008, Calc. m/z: 712.007

Data File: HeLa\_try\_pH5\_CID\_3xload, Scans: 21538 - 21538

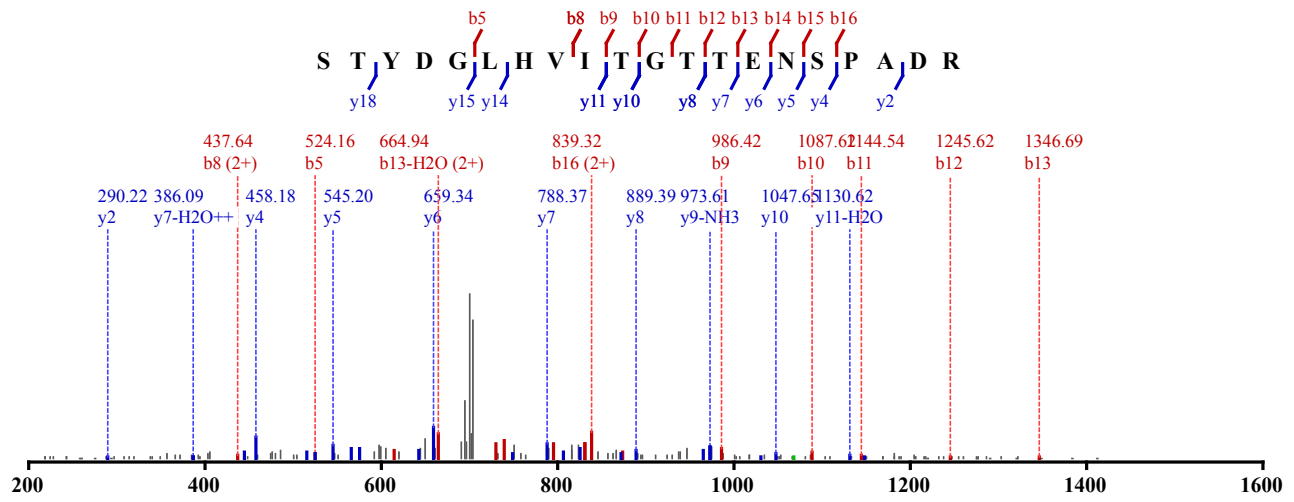

Not Modified

Identified in MSS484 with qvalue 0.00

Charge: 3, Exp. m/z: 712.006, Calc. m/z: 712.007

Data File: HeLa\_Try\_pH5\_HCD\_1, Scans: 36045 - 36045

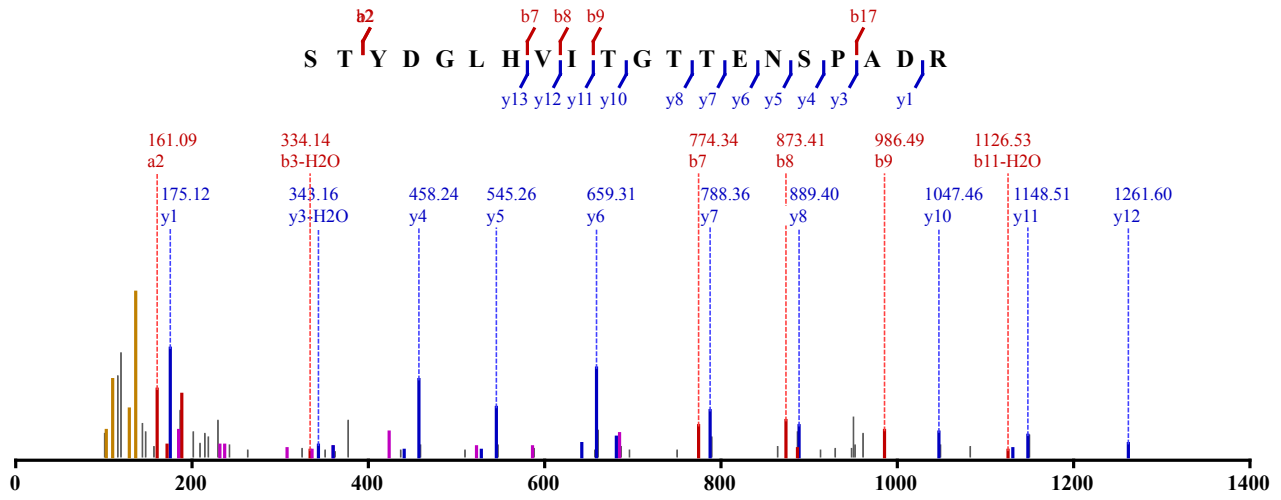

Not Modified

Identified in MSS30 with qvalue 0.00

Charge: 3, Exp. m/z: 750.092, Calc. m/z: 750.091

Data File: 20101224\_Velos1\_TaGe\_SA\_HeLa\_01, Scans: 47996 - 47996

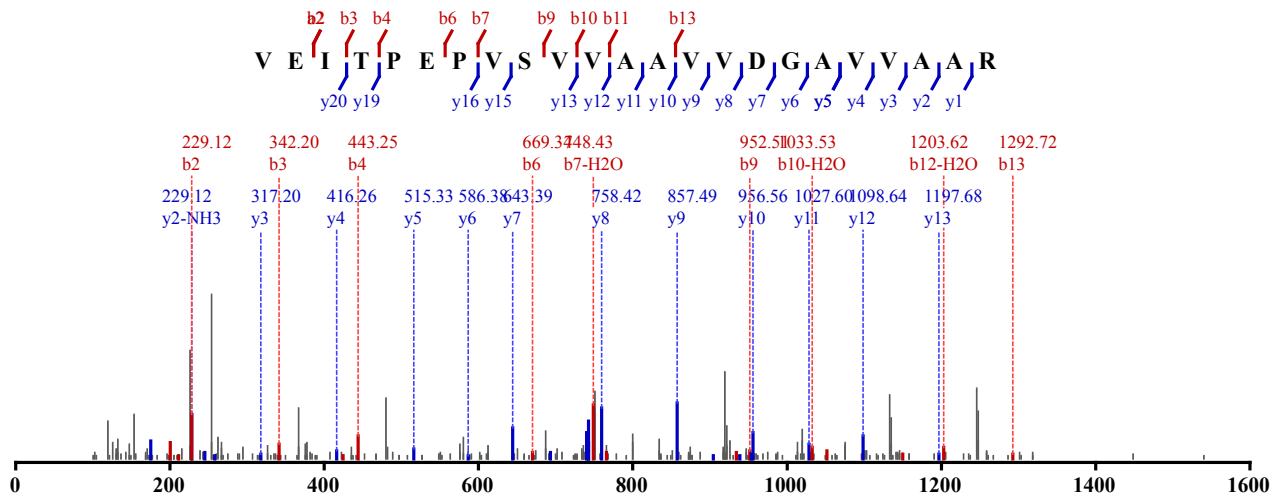

Not Modified

Identified in MSS110 with qvalue 0.00

Charge: 3, Exp. m/z: 750.424, Calc. m/z: 750.091

Data File: HeLa\_LysC-try\_CID\_3, Scans: 56868 - 56868

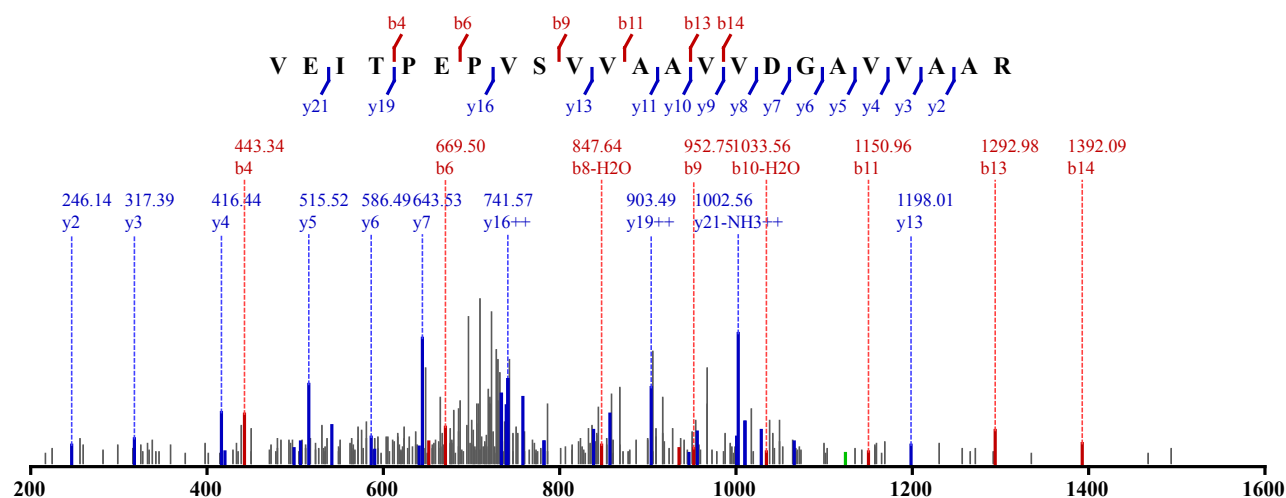

Not Modified

Identified in MSS110 with qvalue 0.00

Charge: 3, Exp. m/z: 750.425, Calc. m/z: 750.091

Data File: HeLa\_LysC-try\_CID\_1, Scans: 54828 - 54828

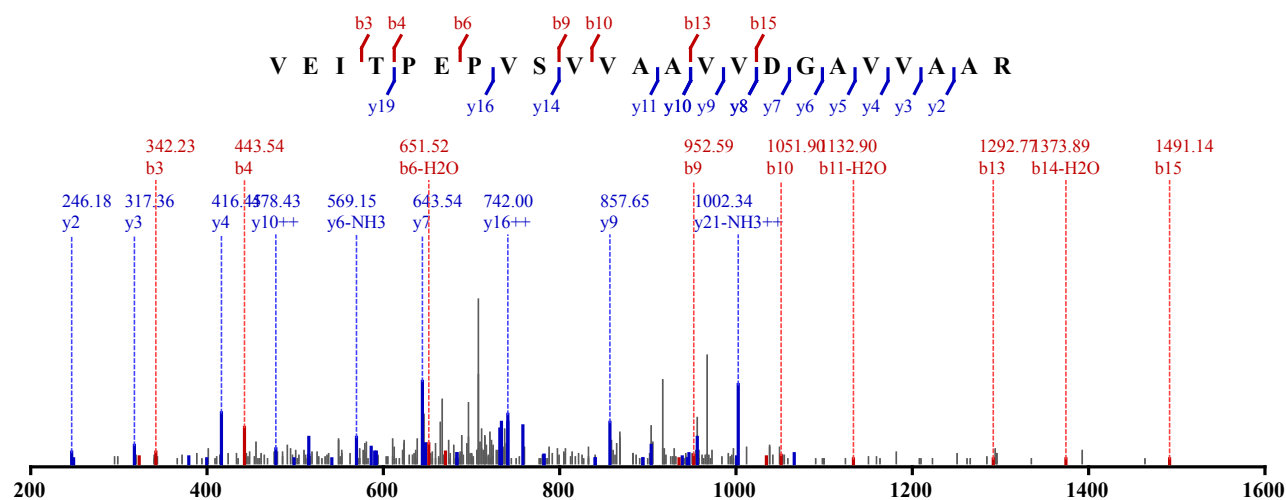

Not Modified

Identified in MSS110 with qvalue 0.00

Charge: 3, Exp. m/z: 750.090, Calc. m/z: 750.091

Data File: HeLa\_LysC-try\_CID\_1, Scans: 54838 - 54838

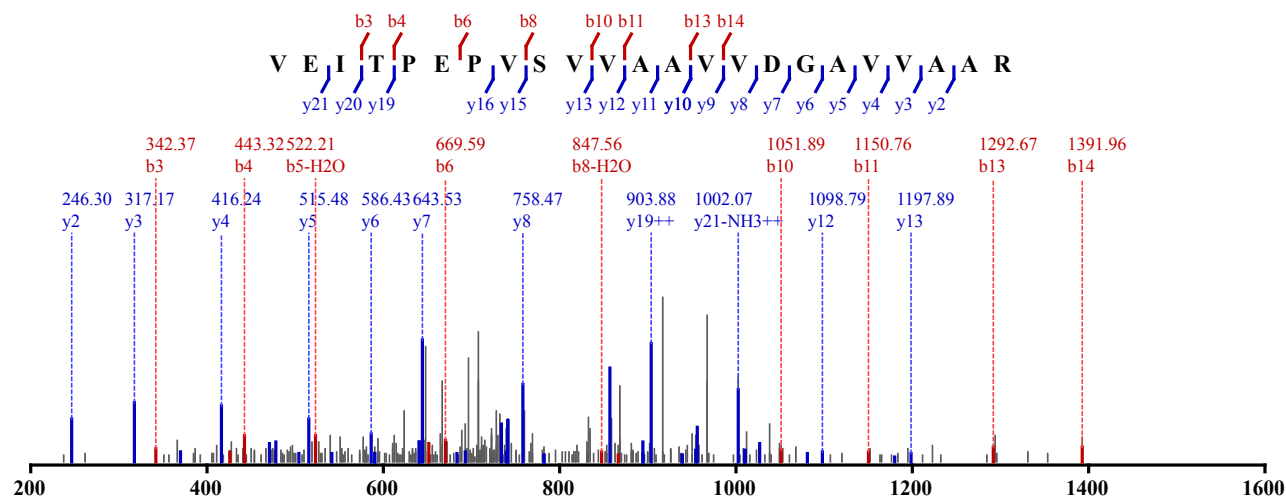

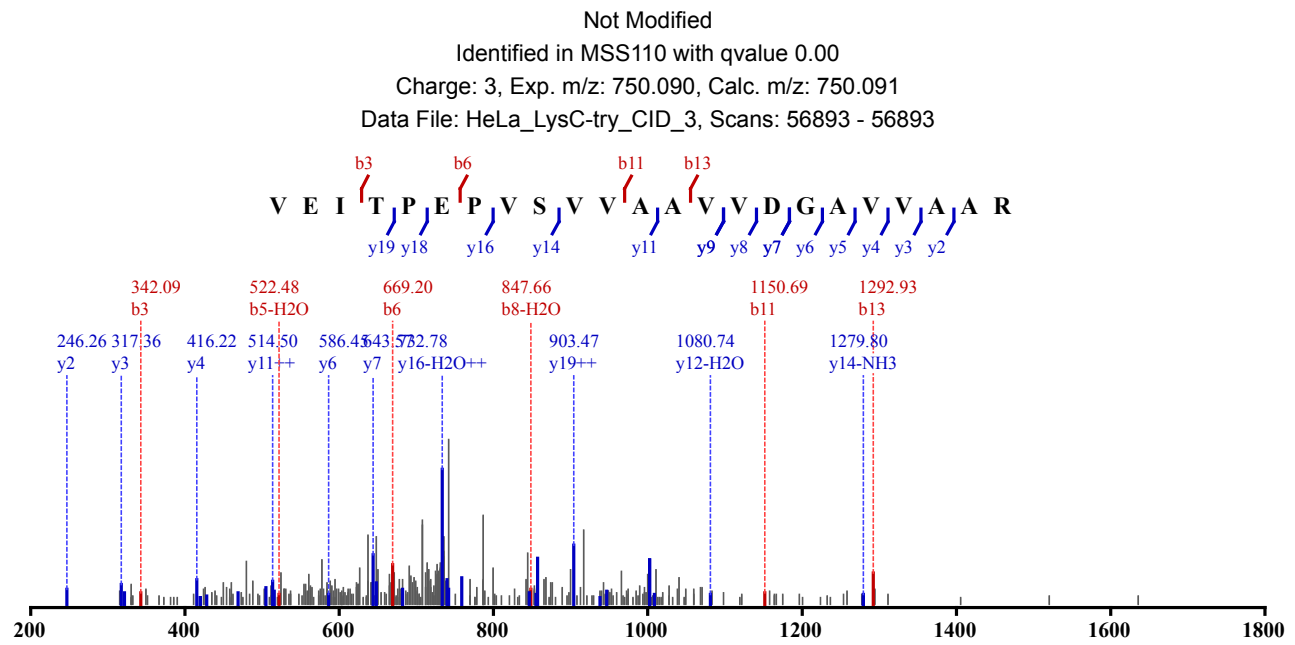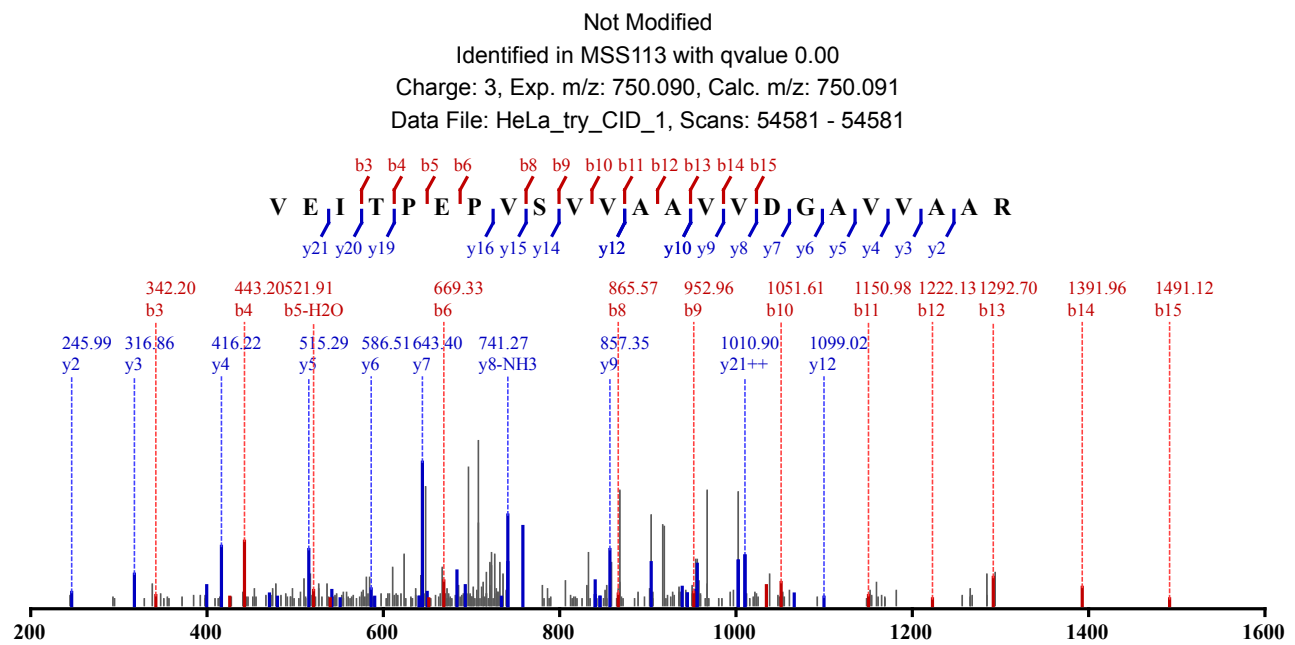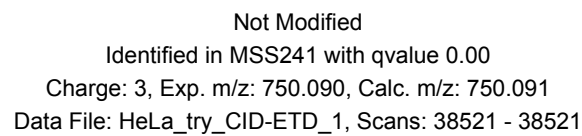

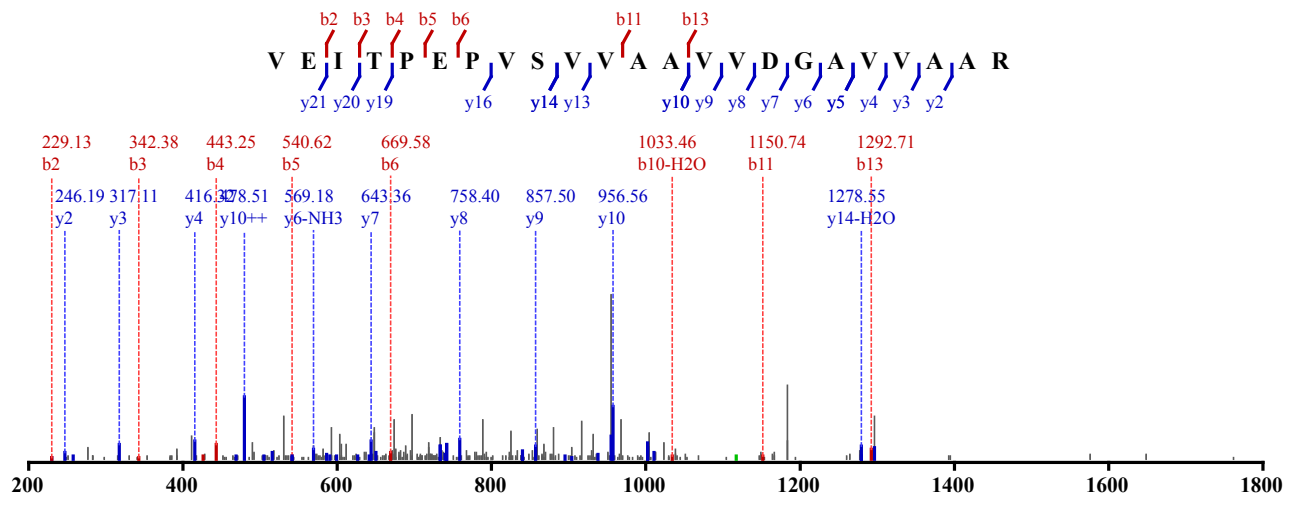

Not Modified  
 Identified in MSS480 with qvalue 0.00  
 Charge: 2, Exp. m/z: 668.332, Calc. m/z: 668.332  
 Data File: HeLa\_try\_pH5\_CID\_3xload\_3, Scans: 23799 - 23799

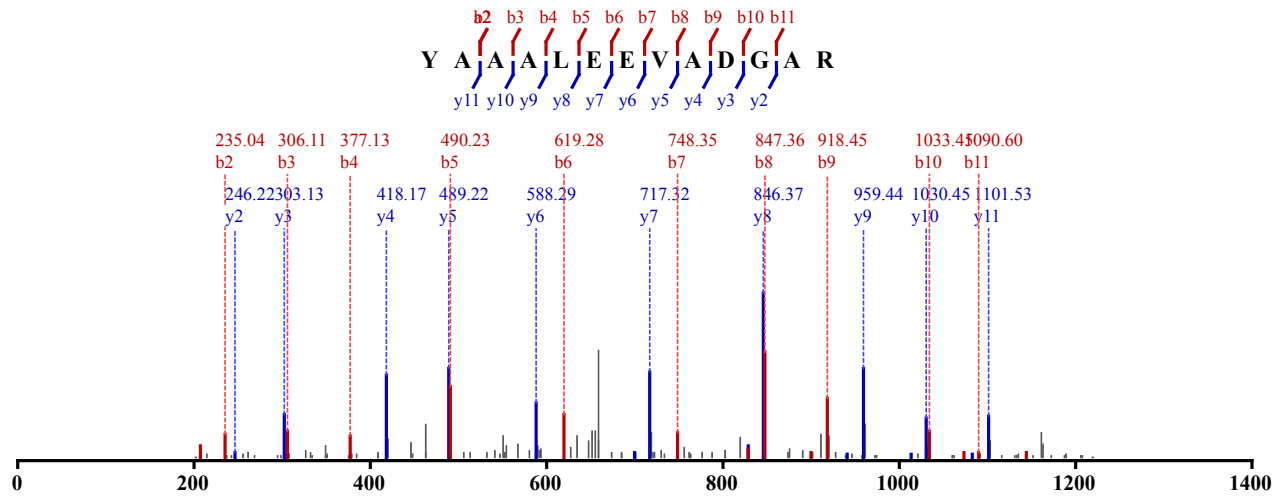

Not Modified  
 Identified in MSS480 with qvalue 0.00  
 Charge: 2, Exp. m/z: 668.331, Calc. m/z: 668.332  
 Data File: HeLa\_try\_pH5\_CID\_3xload, Scans: 21166 - 21166

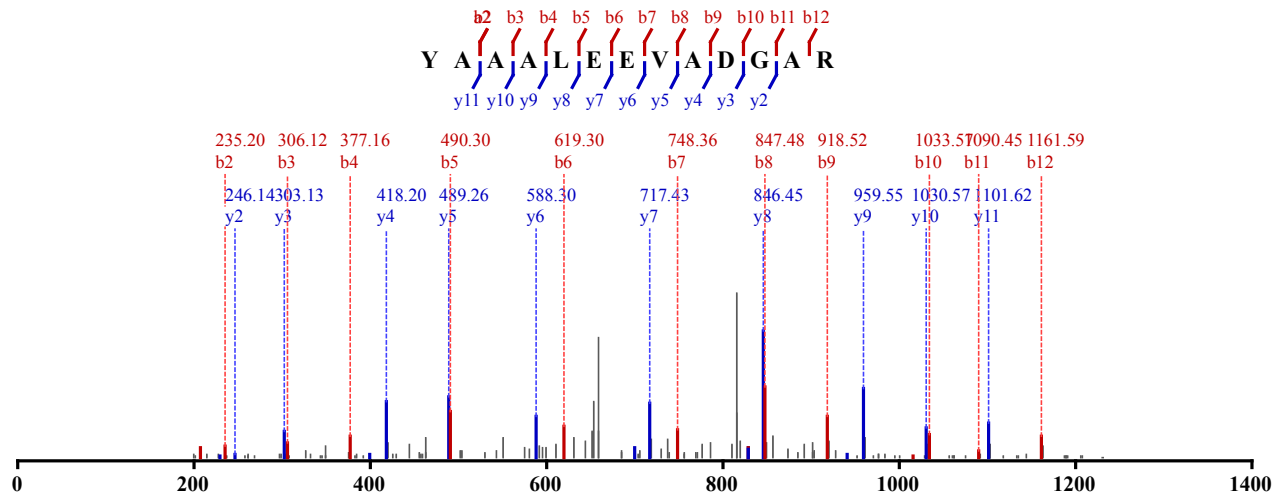

Not Modified  
 Identified in MSS484 with qvalue 0.00  
 Charge: 2, Exp. m/z: 668.330, Calc. m/z: 668.332



Data File: HeLa\_Try\_pH5\_HCD\_1, Scans: 38117 - 38117

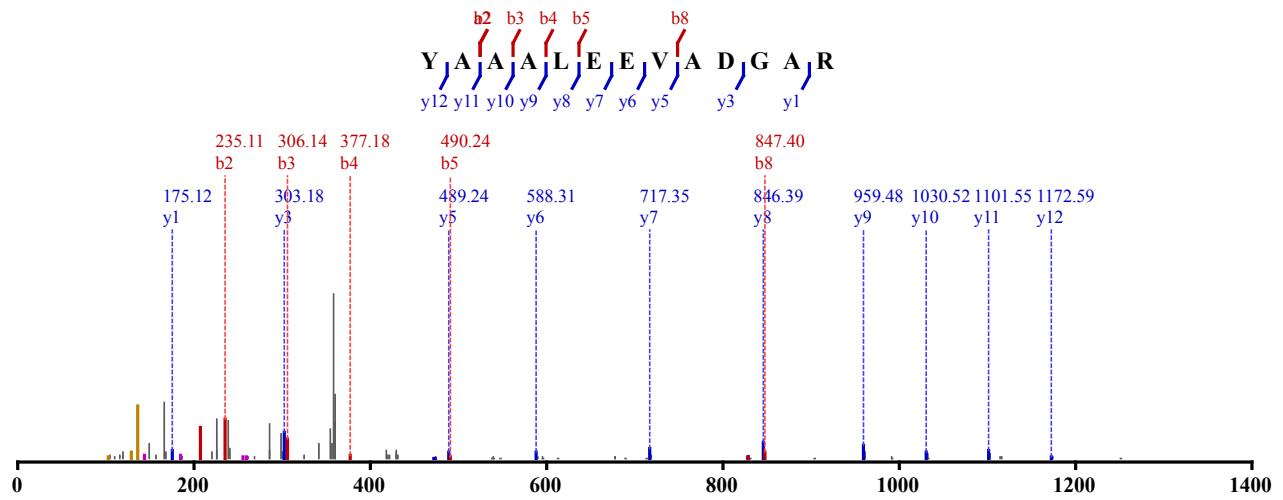

Not Modified

Identified in MSS481 with qvalue 0.00

Charge: 2, Exp. m/z: 709.889, Calc. m/z: 709.387

Data File: HeLa\_LysC\_pH8\_CID\_3xload\_3, Scans: 39017 - 39017

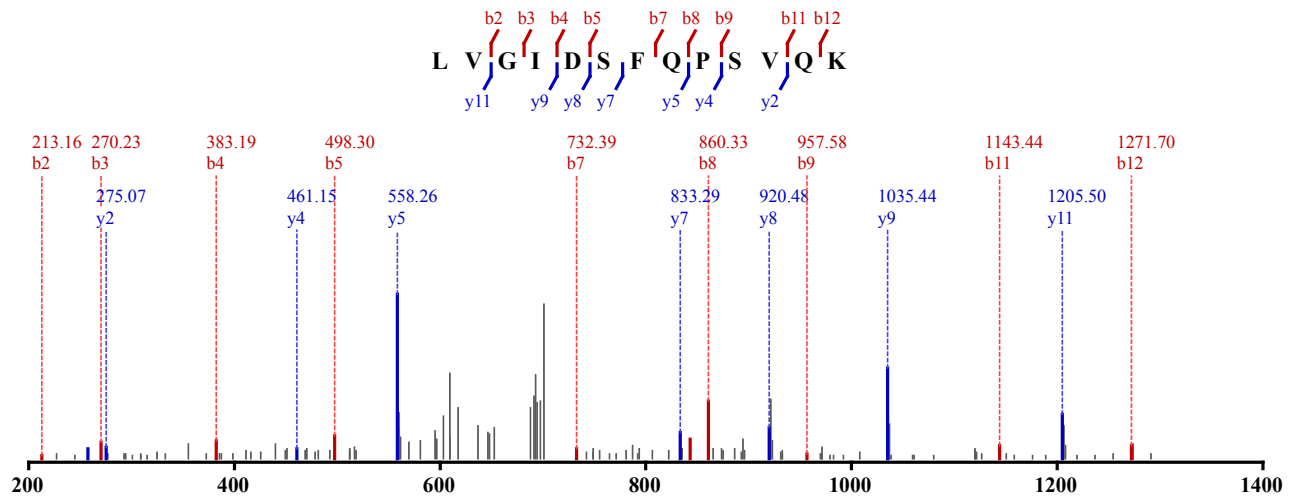

Not Modified

Identified in MSS480 with qvalue 0.00

Charge: 2, Exp. m/z: 839.392, Calc. m/z: 839.392

Data File: HeLa\_try\_pH2\_CID\_3xload, Scans: 24552 - 24552

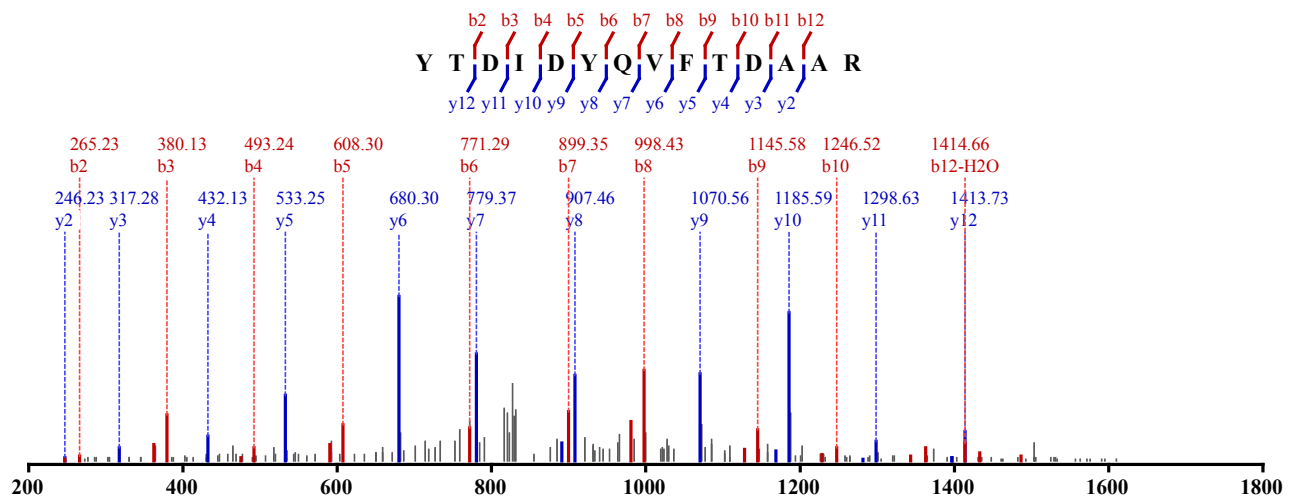

Not Modified

Identified in MSS479 with qvalue 0.00  
 Charge: 2, Exp. m/z: 650.814, Calc. m/z: 650.812  
 Data File: HeLa\_AspN\_pH3\_HCD\_1, Scans: 47580 - 47580

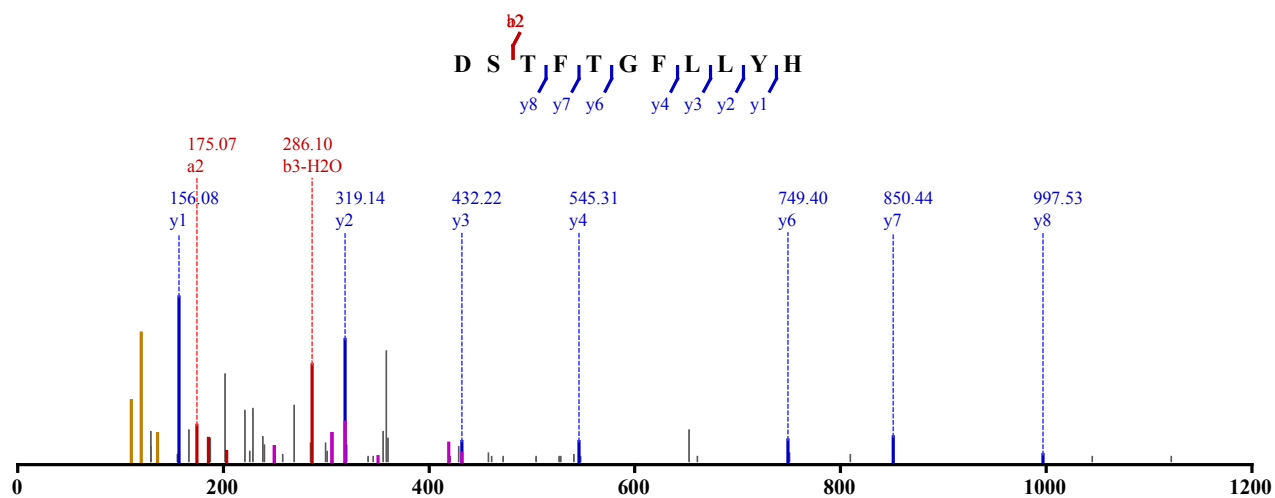

Not Modified  
 Identified in MSS479 with qvalue 0.00  
 Charge: 2, Exp. m/z: 650.814, Calc. m/z: 650.812  
 Data File: HeLa\_AspN\_pH3\_HCD\_3, Scans: 47091 - 47091

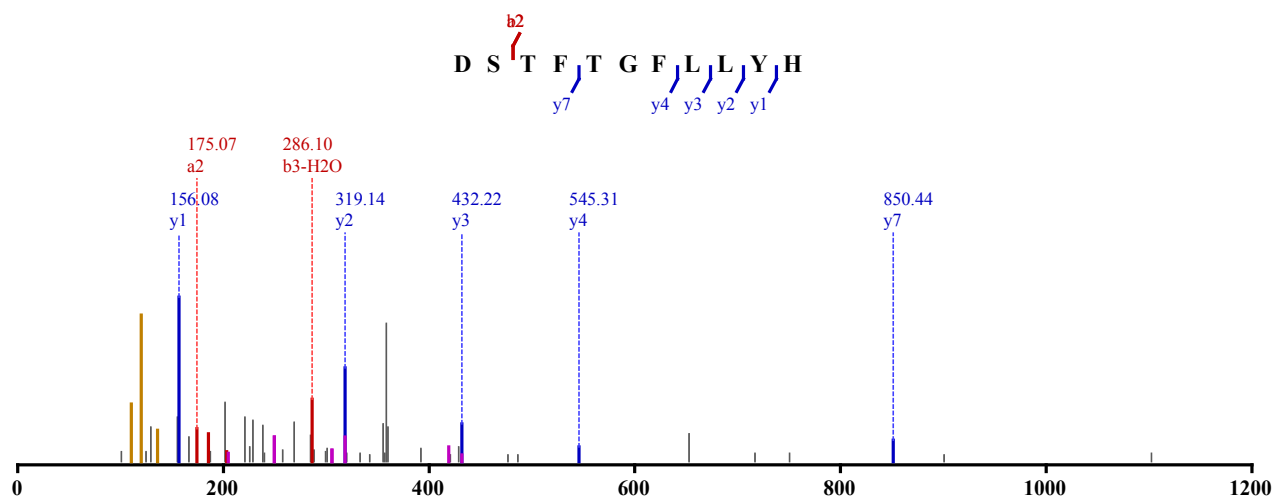

Not Modified  
 Identified in MSS483 with qvalue 0.00  
 Charge: 2, Exp. m/z: 650.815, Calc. m/z: 650.812  
 Data File: HeLa\_AspN\_pH3\_CID\_3xload, Scans: 37870 - 37870

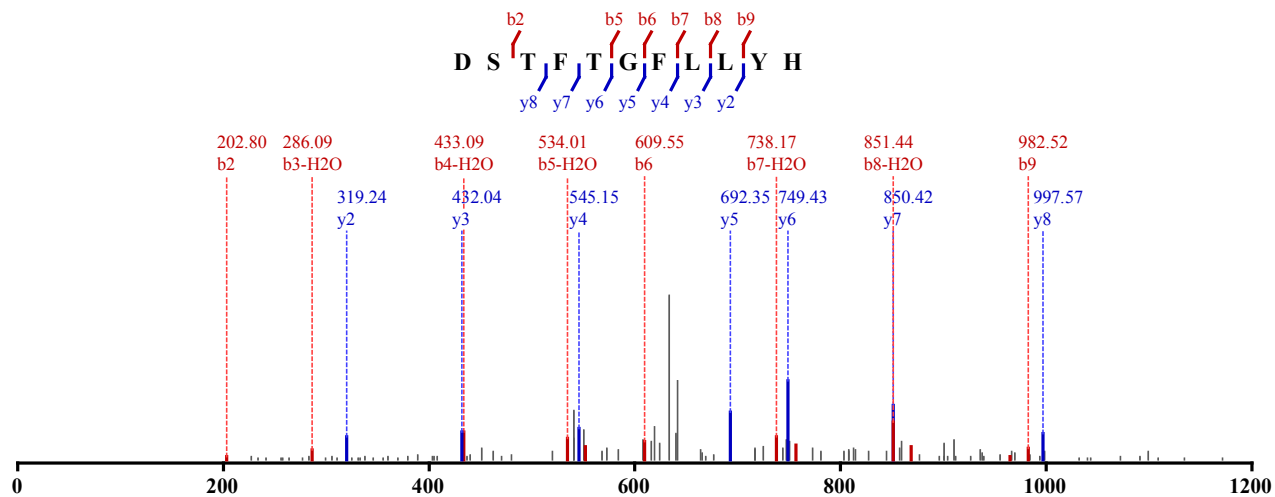

Not Modified

Identified in MSS30 with qvalue 0.01

Charge: 3, Exp. m/z: 487.916, Calc. m/z: 487.921

Data File: 20101224\_Velos1\_TaGe\_SA\_HeLa\_03, Scans: 27717 - 27717

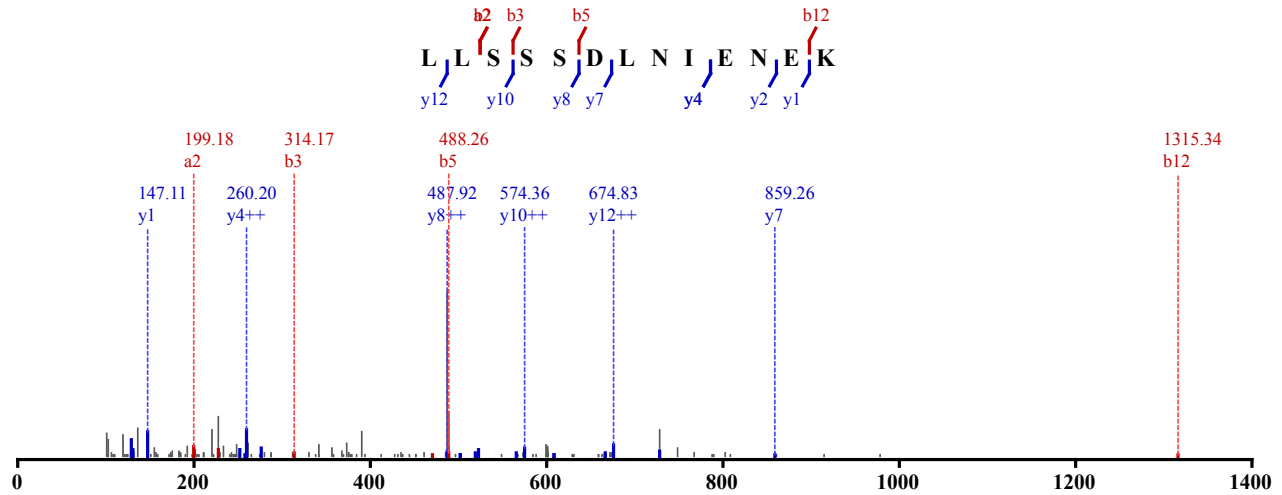

Not Modified

Identified in MSS481 with qvalue 0.00

Charge: 2, Exp. m/z: 731.878, Calc. m/z: 731.377

Data File: HeLa\_LysC\_pH4\_CID\_3xload, Scans: 19383 - 19383

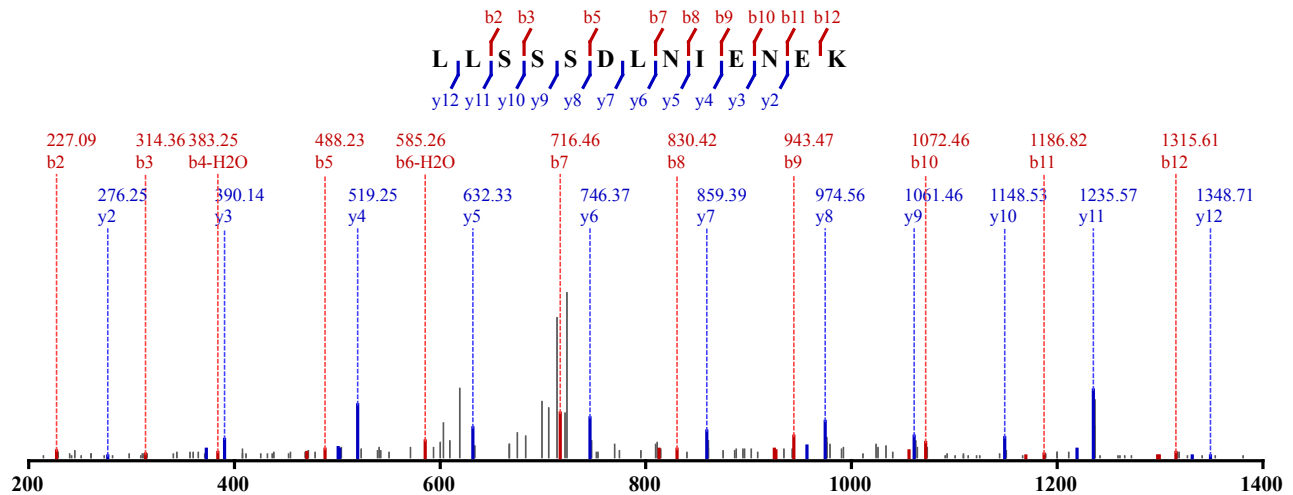

Not Modified

Identified in MSS481 with qvalue 0.00

Charge: 2, Exp. m/z: 731.376, Calc. m/z: 731.377

Data File: HeLa\_LysC\_pH5\_CID\_3xload\_3, Scans: 22857 - 22857

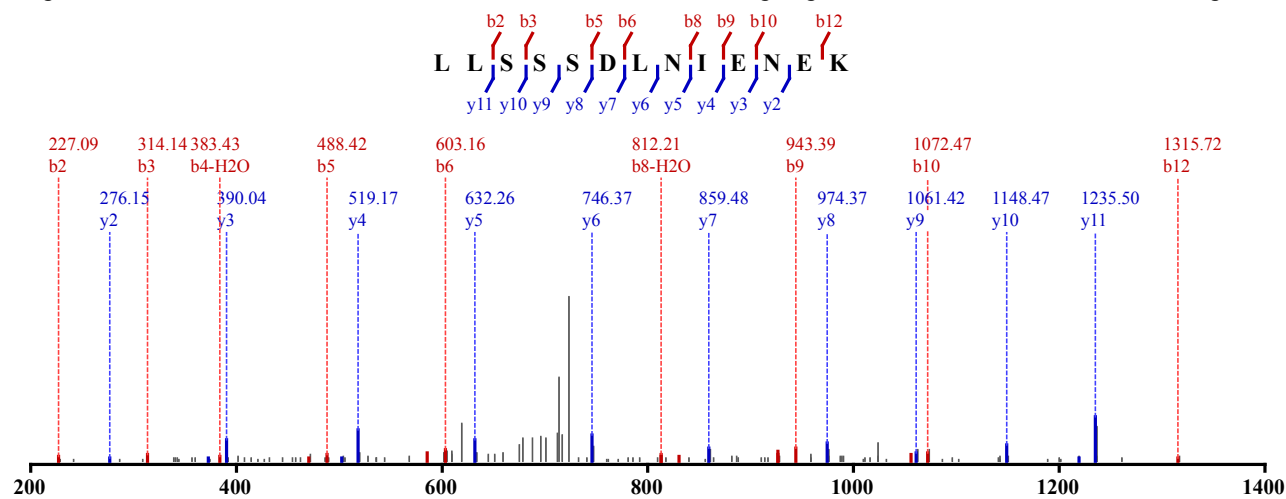

Not Modified

Identified in MSS481 with qvalue 0.00

Charge: 2, Exp. m/z: 731.375, Calc. m/z: 731.377

Data File: HeLa\_LysC\_pH4\_CID\_3xload\_3, Scans: 19697 - 19697

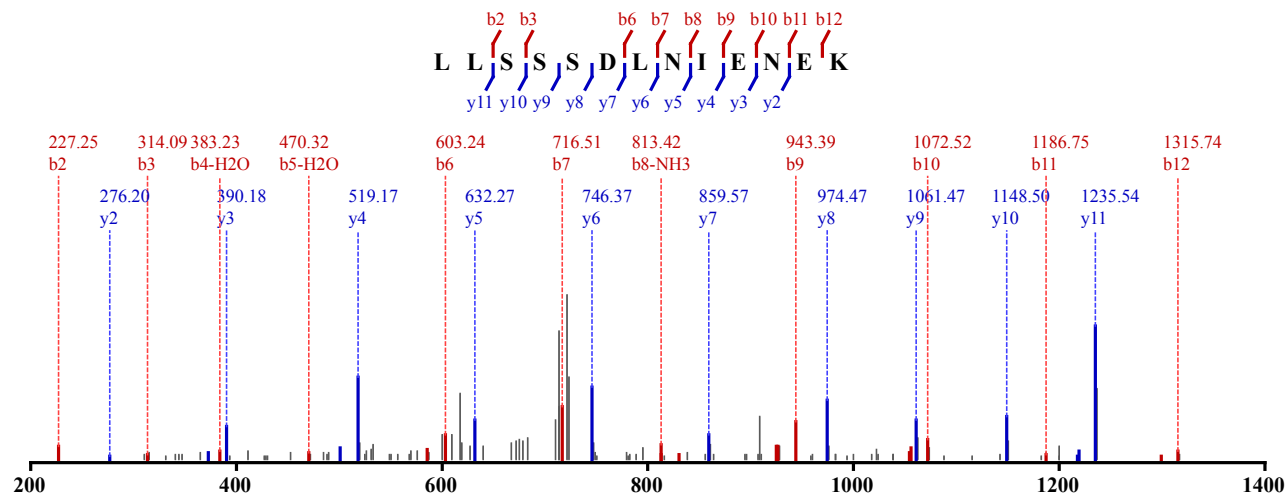

Not Modified

Identified in MSS485 with qvalue 0.00

Charge: 2, Exp. m/z: 731.375, Calc. m/z: 731.377

Data File: HeLa\_LysC\_pH4\_HCD\_1, Scans: 34537 - 34537

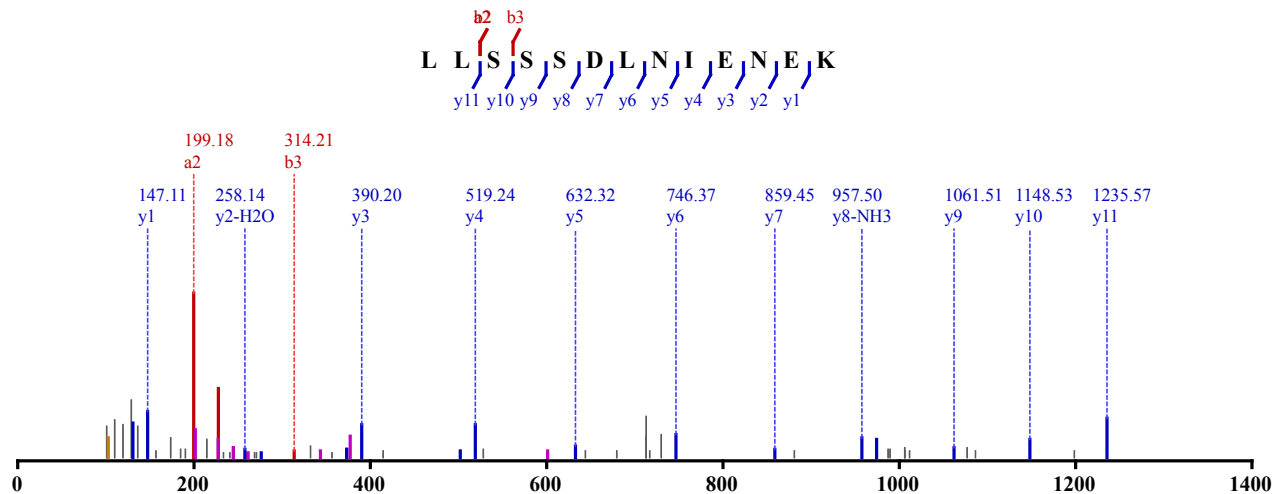

Not Modified

Identified in MSS483 with qvalue 0.00

Charge: 3, Exp. m/z: 640.952, Calc. m/z: 640.951

Data File: HeLa\_AspN\_pH3\_CID\_3xload\_2, Scans: 7771 - 7771

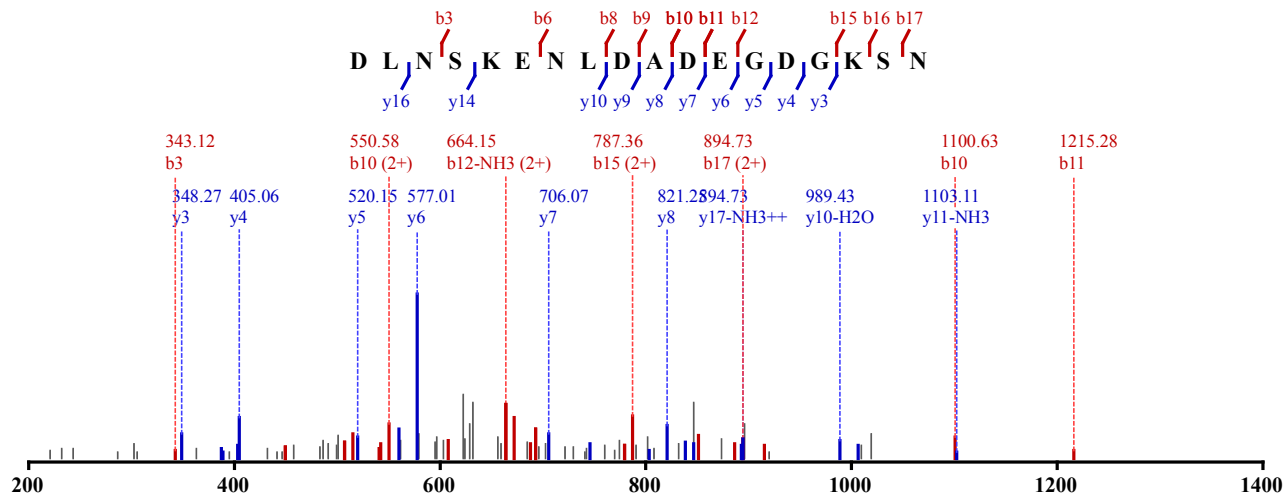

Not Modified

Identified in MSS480 with qvalue 0.00

Charge: 3, Exp. m/z: 697.635, Calc. m/z: 697.634

Data File: HeLa\_try\_pH3\_CID\_3xload\_3, Scans: 17654 - 17654

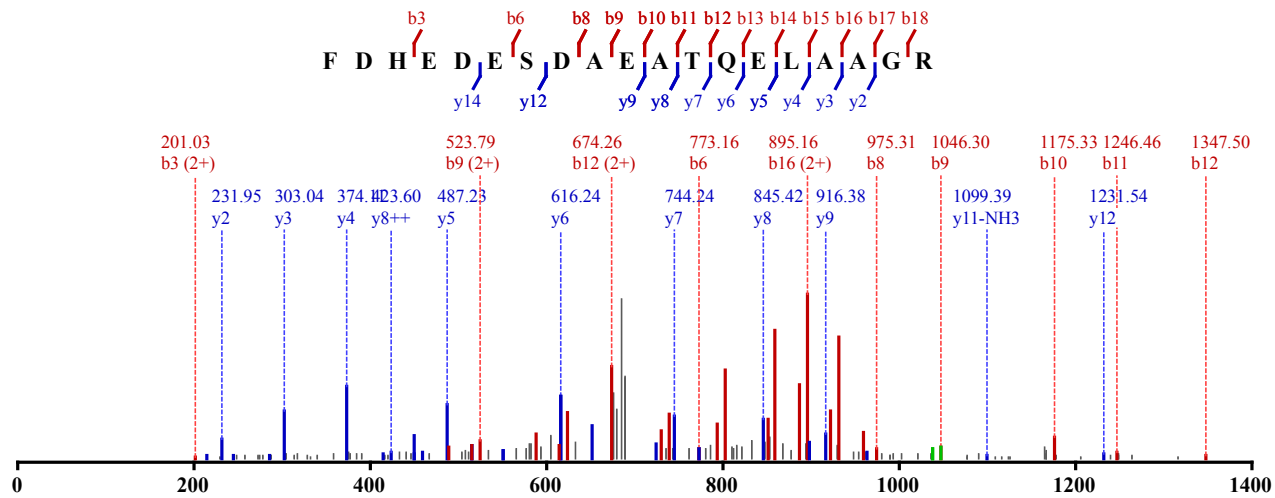

Not Modified

Identified in MSS484 with qvalue 0.00

Charge: 3, Exp. m/z: 697.637, Calc. m/z: 697.634

Data File: HeLa\_Try\_pH3\_HCD\_1, Scans: 24905 - 24905

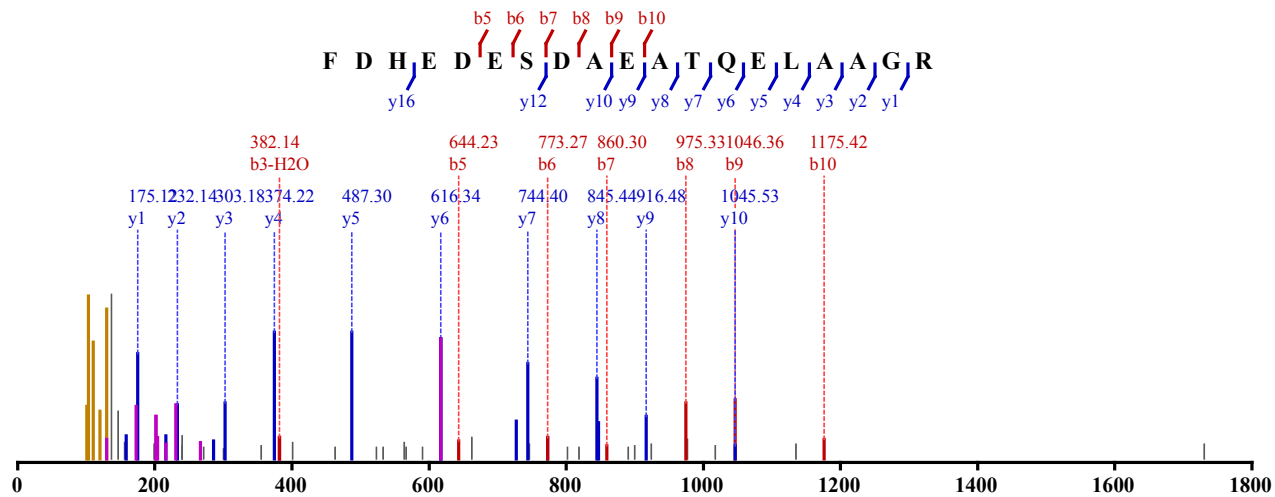

Not Modified

Identified in MSS484 with qvalue 0.00  
 Charge: 3, Exp. m/z: 697.300, Calc. m/z: 697.634  
 Data File: HeLa\_Try\_pH3\_HCD\_2, Scans: 25108 - 25108

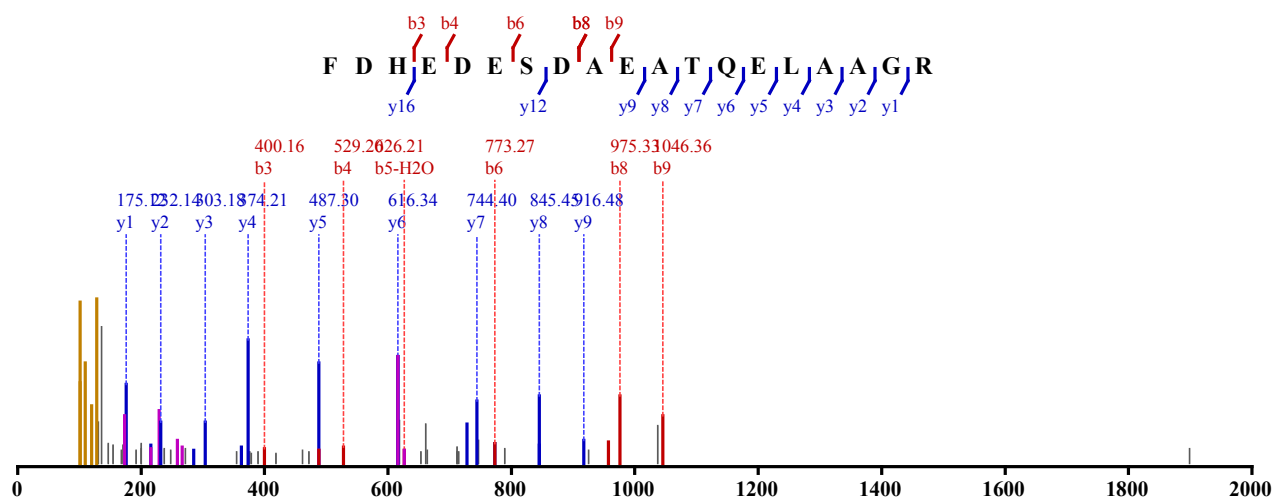

2 x Carbamidomethyl (C)  
 Identified in MSS479 with qvalue 0.00  
 Charge: 4, Exp. m/z: 739.361, Calc. m/z: 739.362  
 Data File: HeLa\_AspN\_80pcACN\_HCD\_1, Scans: 37900 - 37900

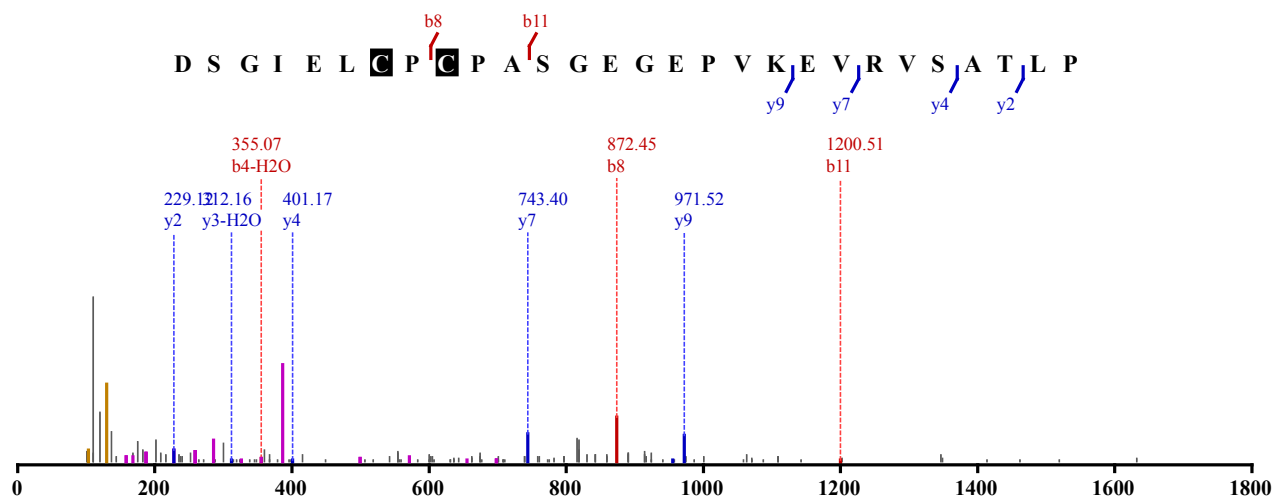

2 x Carbamidomethyl (C)  
 Identified in MSS479 with qvalue 0.00  
 Charge: 4, Exp. m/z: 739.362, Calc. m/z: 739.362  
 Data File: HeLa\_AspN\_80pcACN\_HCD\_2, Scans: 37410 - 37410

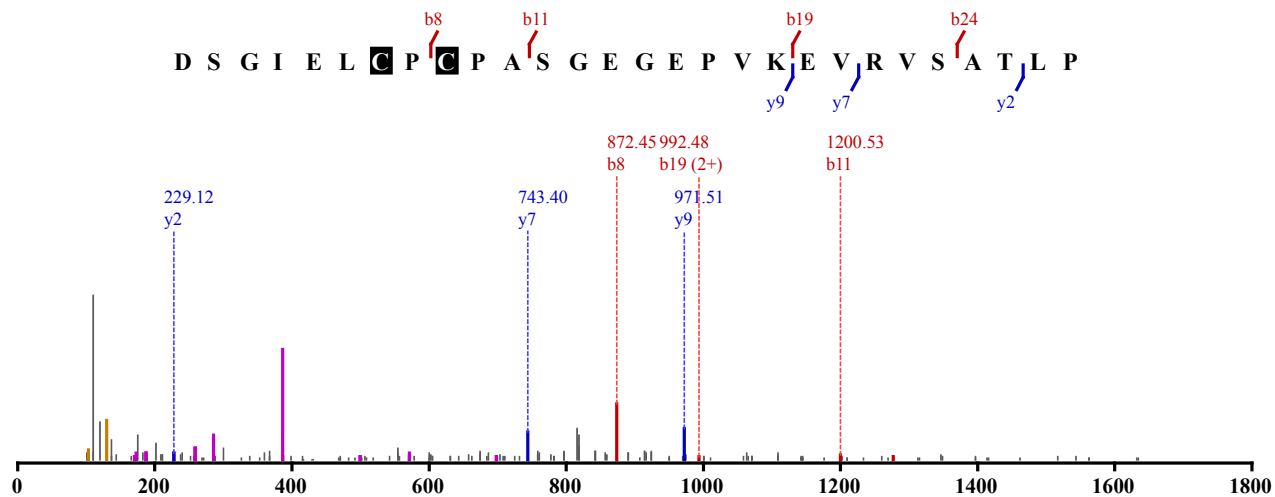

2 x Carbamidomethyl (C)  
 Identified in MSS479 with qvalue 0.00  
 Charge: 4, Exp. m/z: 739.362, Calc. m/z: 739.362  
 Data File: HeLa\_AspN\_80pcACN\_HCD\_3, Scans: 37073 - 37073

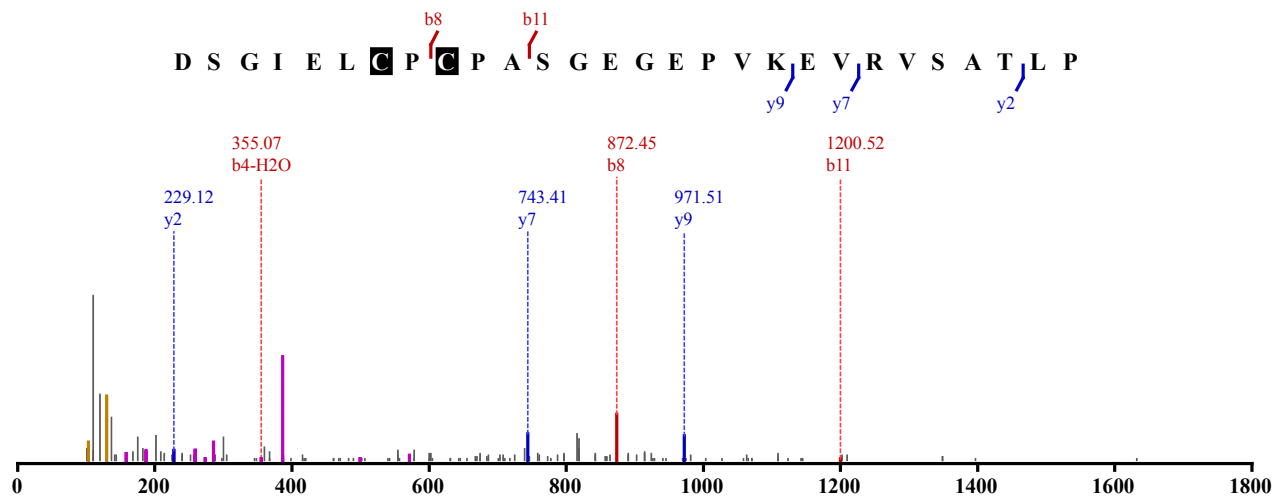

2 x Carbamidomethyl (C)  
 Identified in MSS479 with qvalue 0.00  
 Charge: 5, Exp. m/z: 591.691, Calc. m/z: 591.691  
 Data File: HeLa\_AspN\_80pcACN\_HCD\_3, Scans: 37075 - 37075

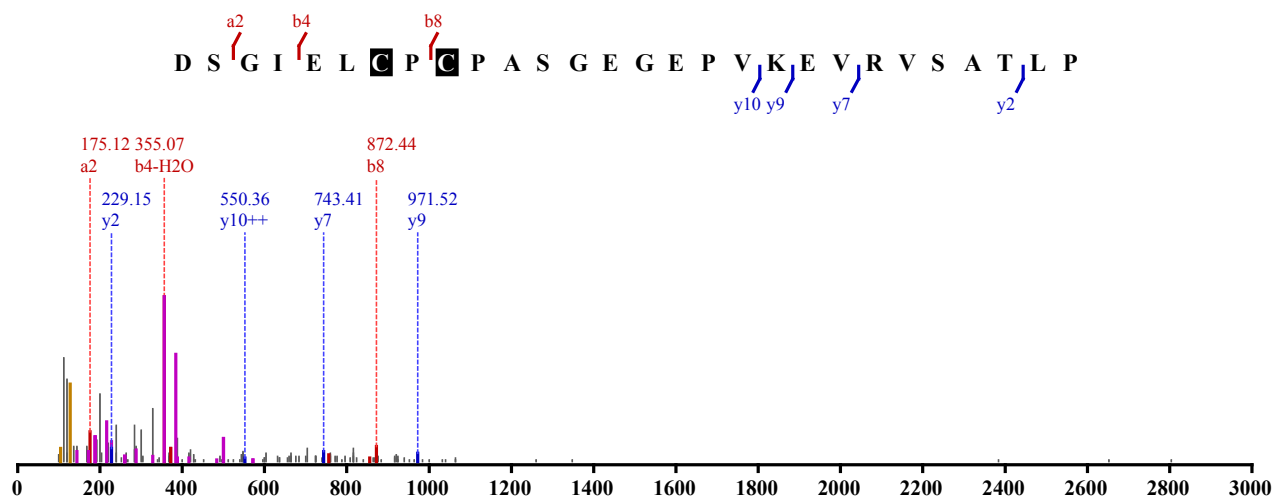

2 x Carbamidomethyl (C)  
 Identified in MSS479 with qvalue 0.01  
 Charge: 4, Exp. m/z: 739.363, Calc. m/z: 739.362  
 Data File: HeLa\_AspN\_pH2\_HCD\_1, Scans: 38914 - 38914

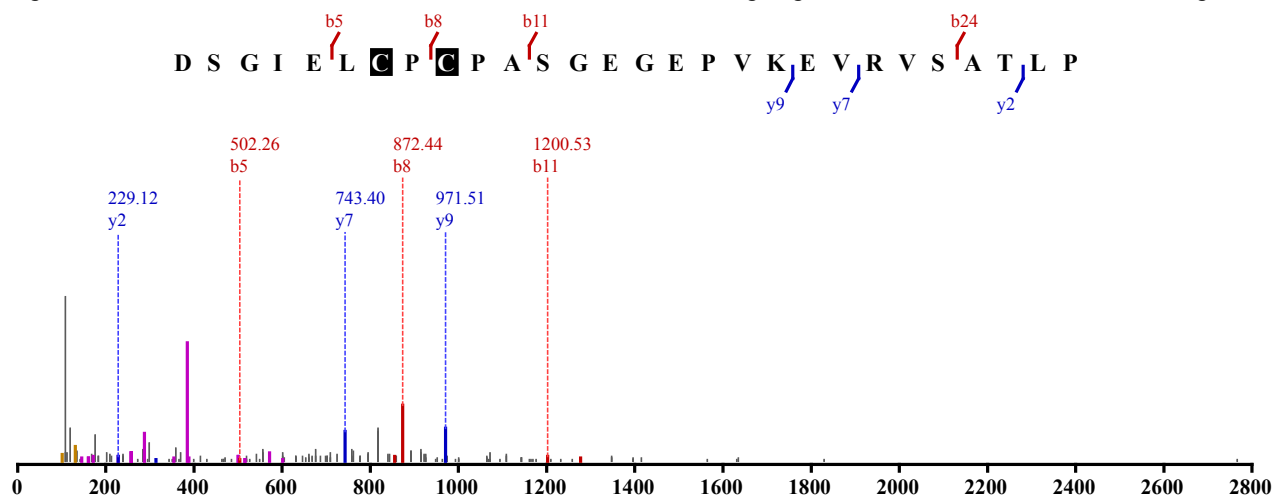

2 x Carbamidomethyl (C)  
 Identified in MSS479 with qvalue 0.00  
 Charge: 4, Exp. m/z: 739.363, Calc. m/z: 739.362  
 Data File: HeLa\_AspN\_pH2\_HCD\_1, Scans: 38992 - 38992

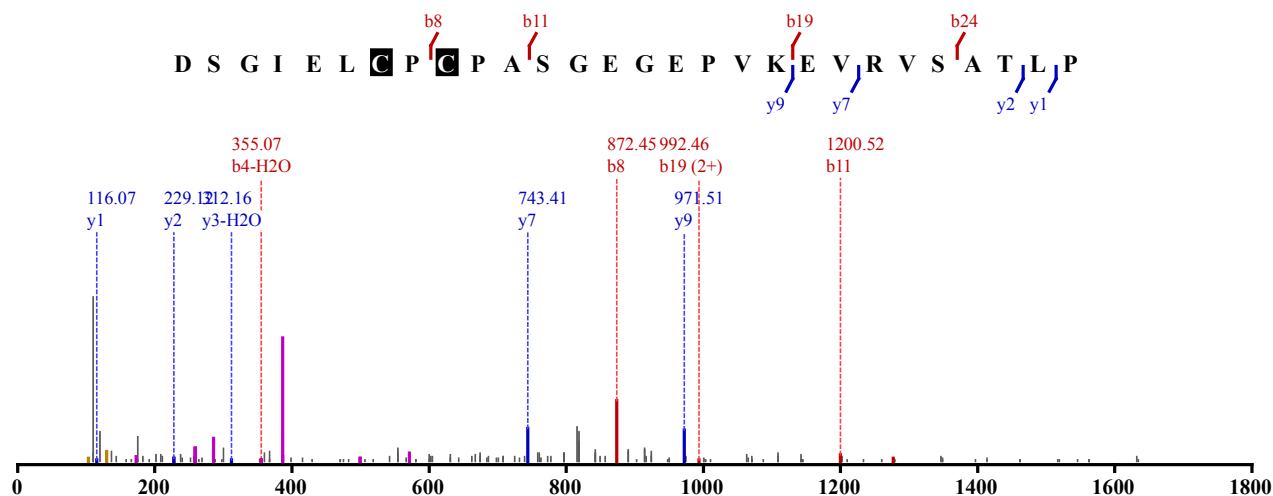

2 x Carbamidomethyl (C)  
 Identified in MSS479 with qvalue 0.01  
 Charge: 4, Exp. m/z: 739.363, Calc. m/z: 739.362  
 Data File: HeLa\_AspN\_pH2\_HCD\_3, Scans: 38570 - 38570

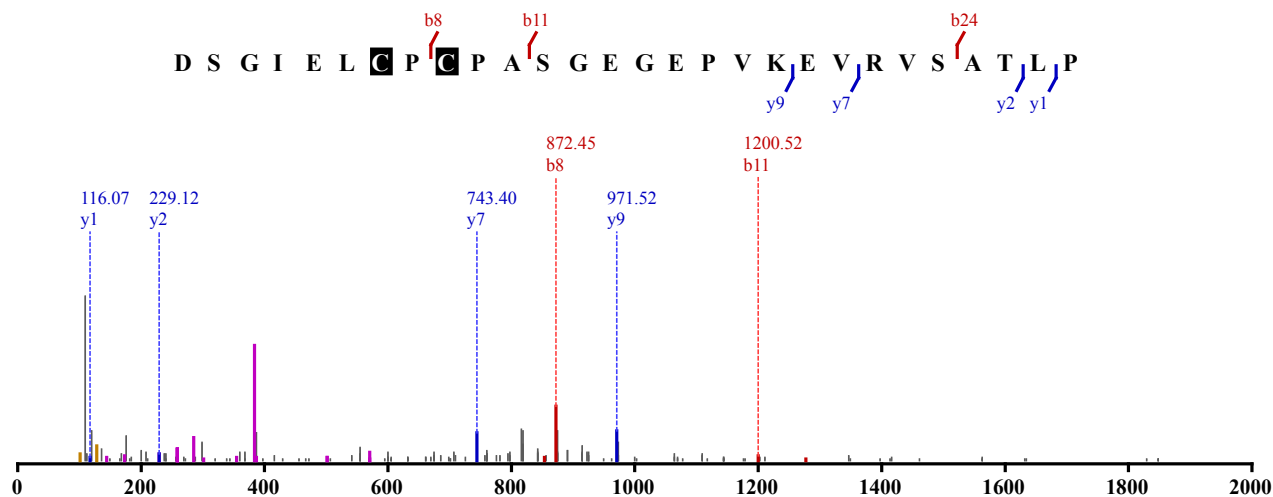

Not Modified  
 Identified in MSS485 with qvalue 0.00  
 Charge: 2, Exp. m/z: 860.401, Calc. m/z: 860.402



Data File: HeLa\_LysC\_pH3\_HCD\_2, Scans: 23140 - 23140

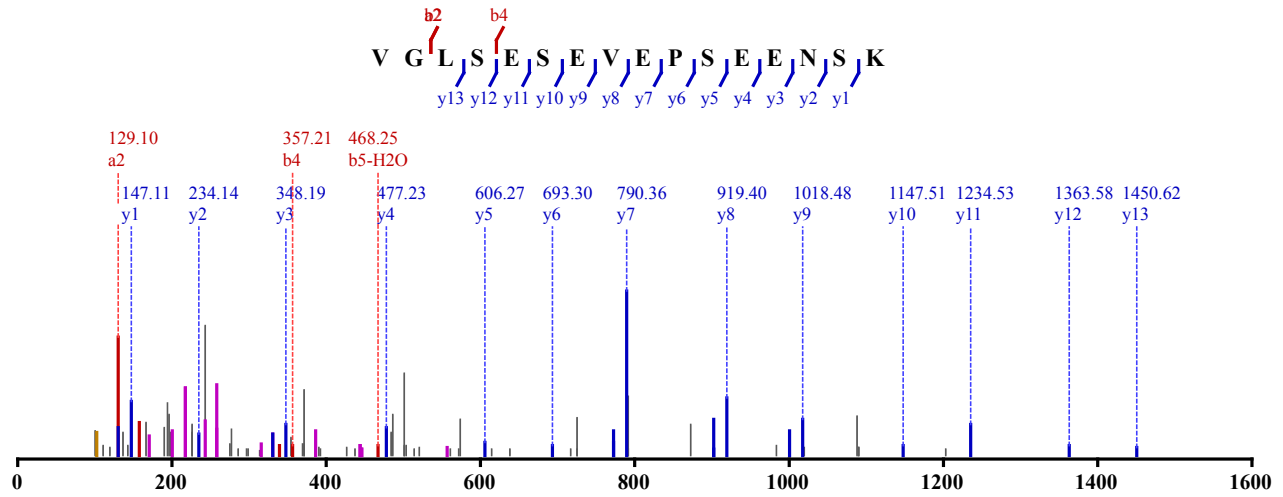

Not Modified

Identified in MSS484 with qvalue 0.00

Charge: 3, Exp. m/z: 565.278, Calc. m/z: 565.281

Data File: HeLa\_Try\_pH11\_HCD\_3, Scans: 17624 - 17624

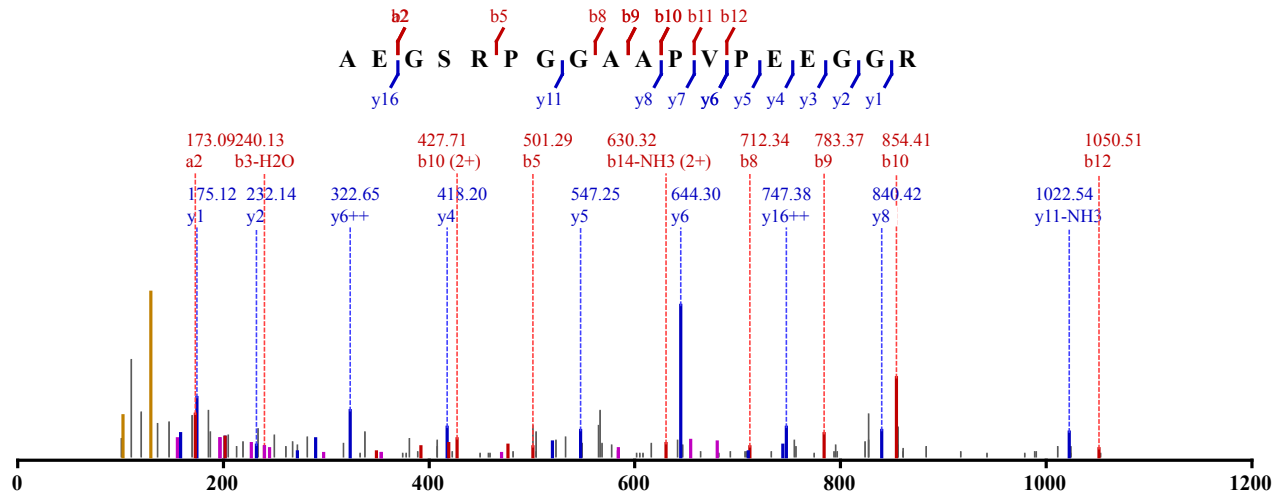

Not Modified

Identified in MSS487 with qvalue 0.00

Charge: 2, Exp. m/z: 500.824, Calc. m/z: 500.823

Data File: HeLa\_ArgC-Try\_80pcACN\_HCD\_1, Scans: 38083 - 38083

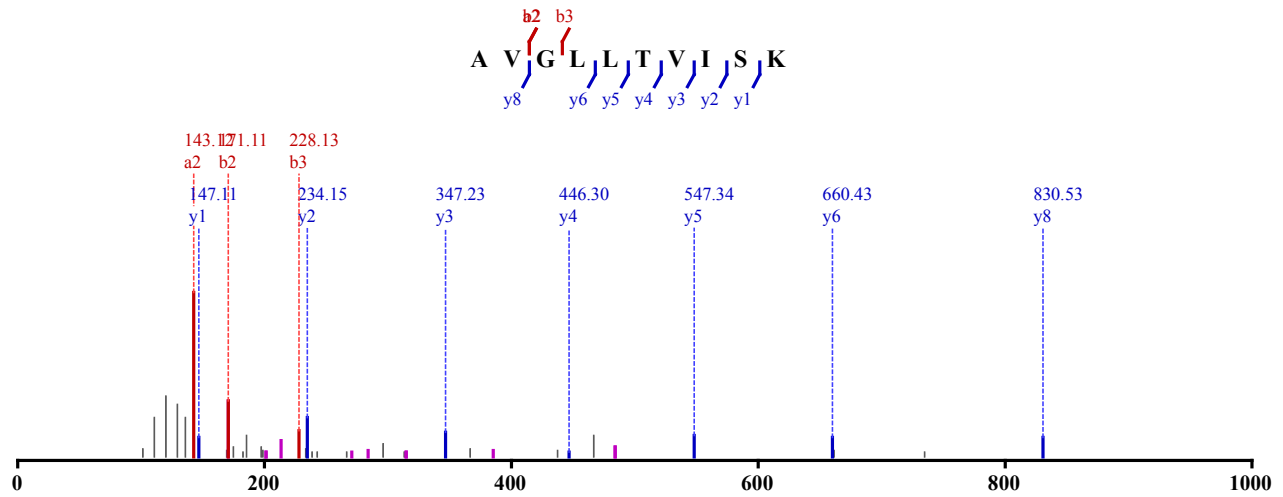

Not Modified

Identified in MSS487 with qvalue 0.00  
 Charge: 2, Exp. m/z: 500.824, Calc. m/z: 500.823  
 Data File: HeLa\_ArgC-Try\_80pcACN\_HCD\_2, Scans: 37676 - 37676

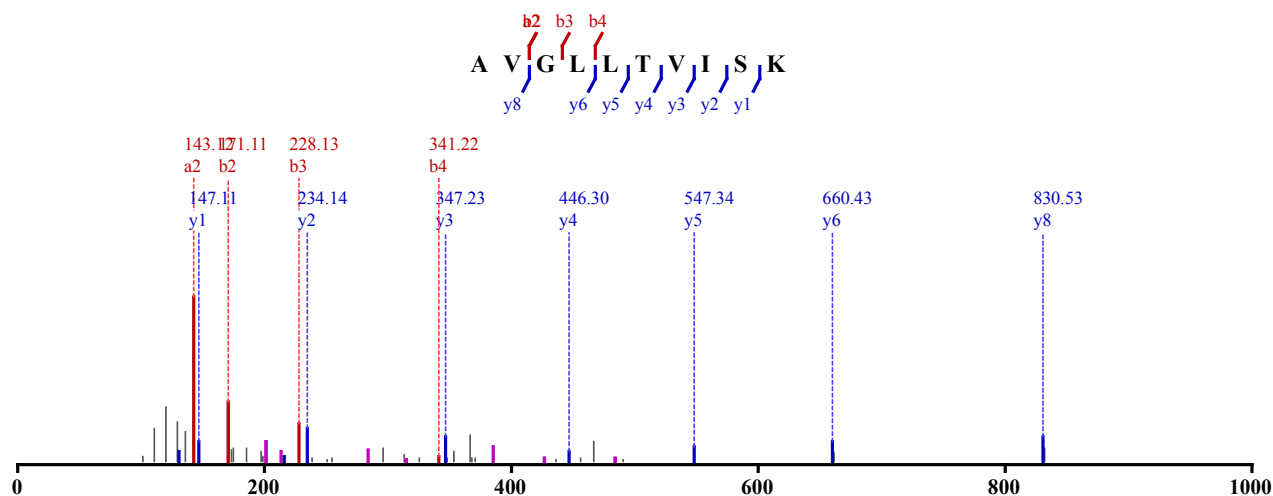

Not Modified  
 Identified in MSS487 with qvalue 0.00  
 Charge: 2, Exp. m/z: 500.824, Calc. m/z: 500.823  
 Data File: HeLa\_ArgC-Try\_80pcACN\_HCD\_3, Scans: 40323 - 40323

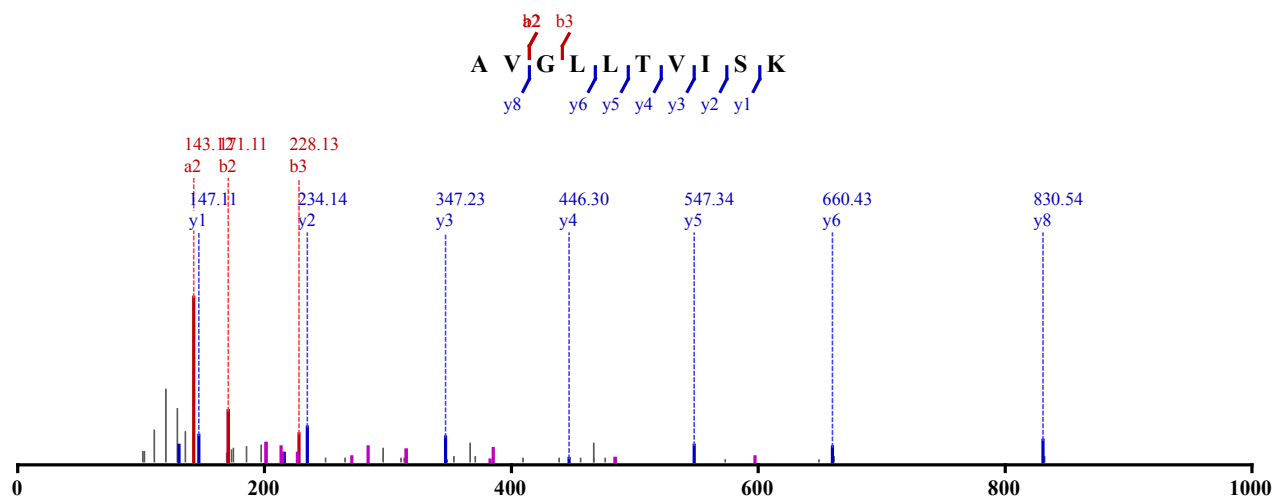

Not Modified  
 Identified in MSS481 with qvalue 0.00  
 Charge: 2, Exp. m/z: 686.345, Calc. m/z: 686.342  
 Data File: HeLa\_LysC\_pH6\_CID\_3xload\_2, Scans: 21621 - 21621

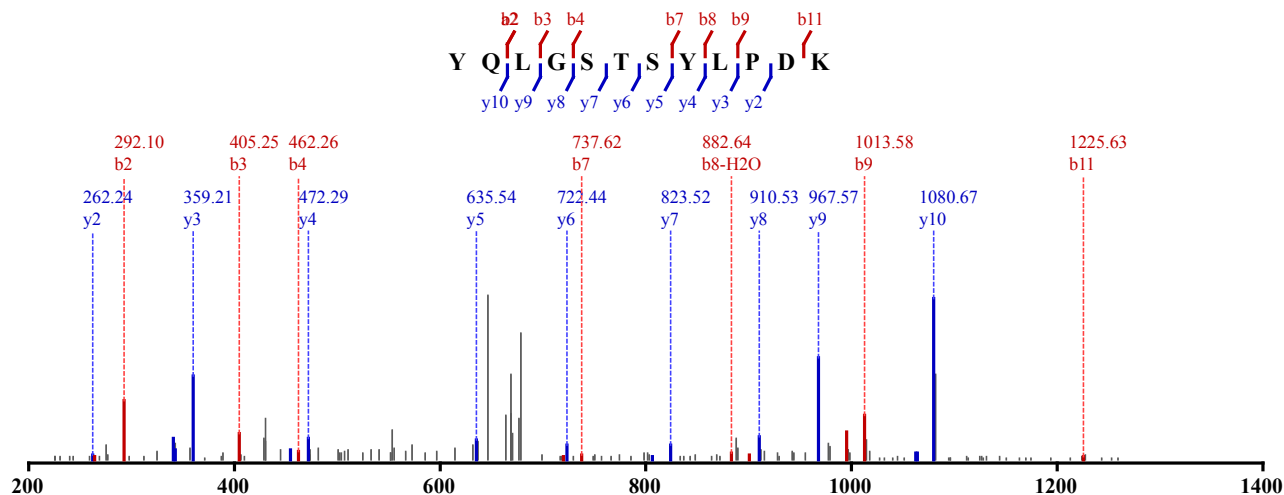

Not Modified

Identified in MSS485 with qvalue 0.00

Charge: 2, Exp. m/z: 686.342, Calc. m/z: 686.342

Data File: HeLa\_LysC\_pH6\_HCD\_2, Scans: 34974 - 34974

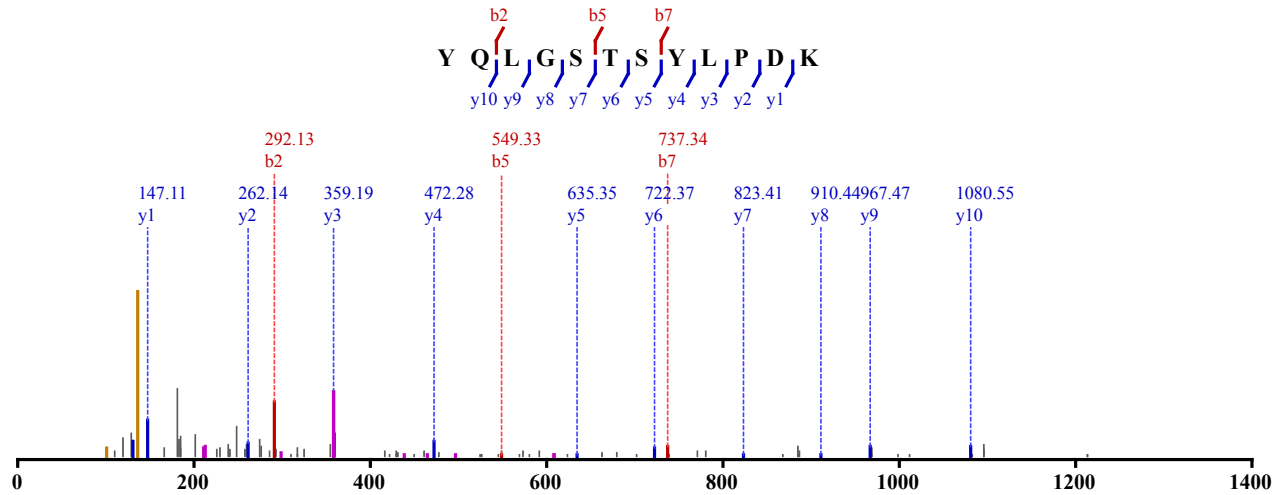

Not Modified

Identified in MSS263 with qvalue 0.01

Charge: 2, Exp. m/z: 552.294, Calc. m/z: 552.292

Data File: HeLa\_ArgC-AspN\_CID\_2, Scans: 1000 - 1000

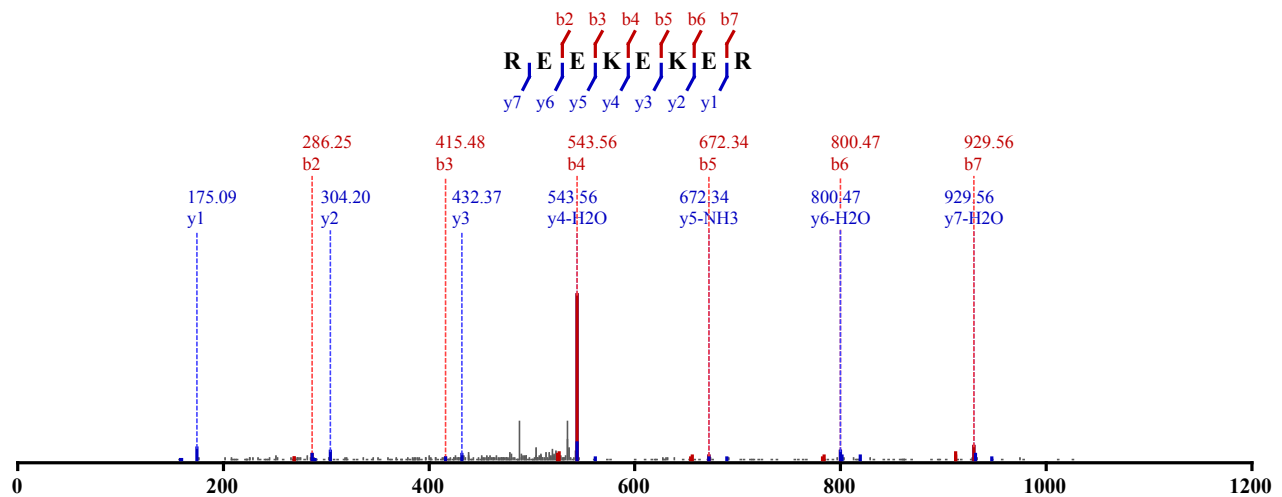

Not Modified

Identified in MSS263 with qvalue 0.01

Charge: 2, Exp. m/z: 552.294, Calc. m/z: 552.292

Data File: HeLa\_ArgC-AspN\_CID\_3, Scans: 1181 - 1181

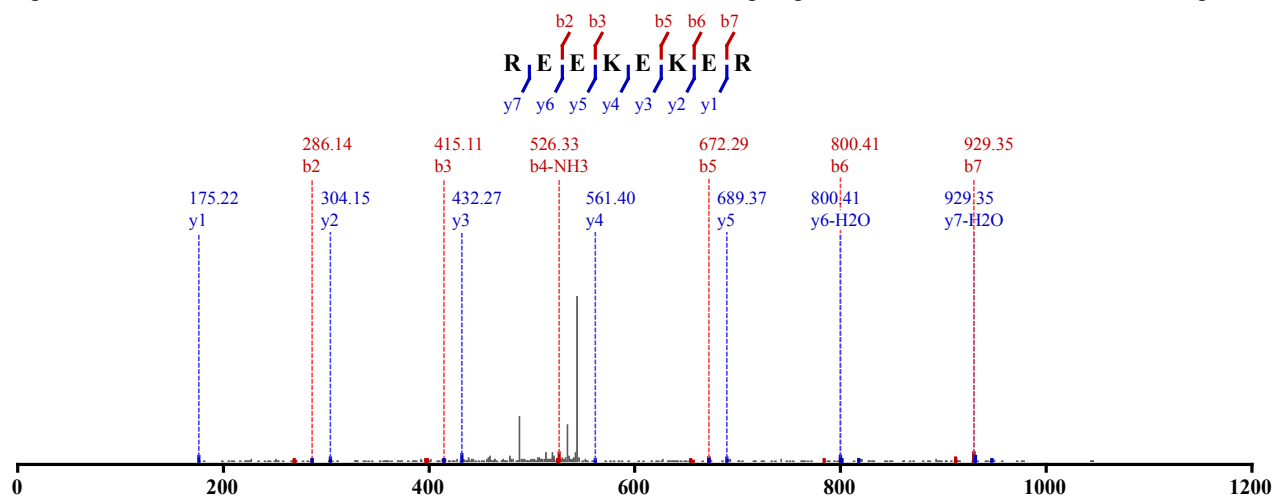

Not Modified  
 Identified in MSS270 with qvalue 0.00  
 Charge: 3, Exp. m/z: 368.532, Calc. m/z: 368.531  
 Data File: HeLa\_ArgC-AspN\_HCD\_1, Scans: 6942 - 6942

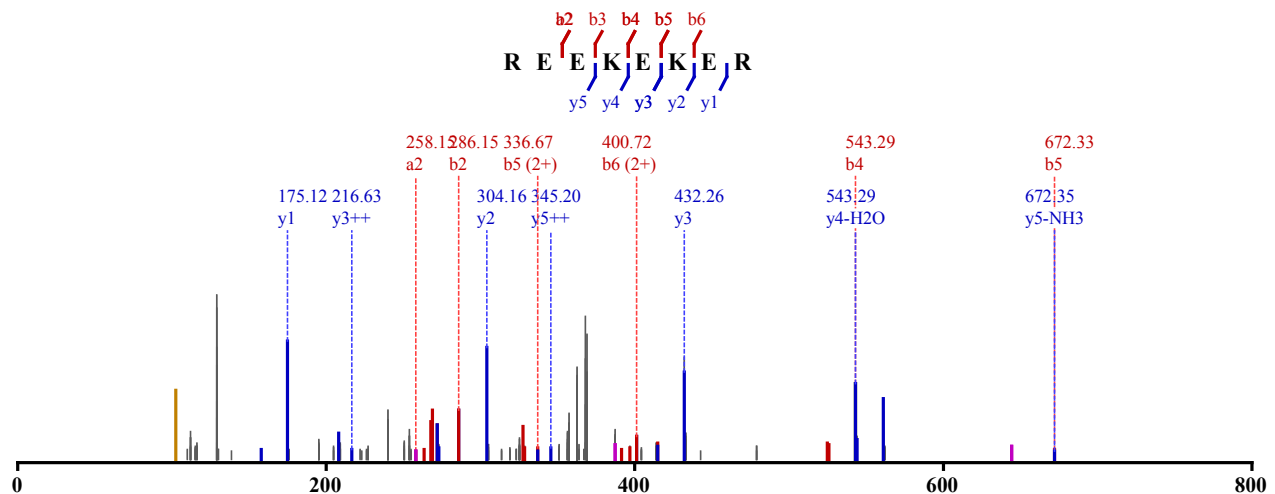

Not Modified  
 Identified in MSS270 with qvalue 0.00  
 Charge: 2, Exp. m/z: 552.294, Calc. m/z: 552.292  
 Data File: HeLa\_ArgC-AspN\_HCD\_1, Scans: 6952 - 6952

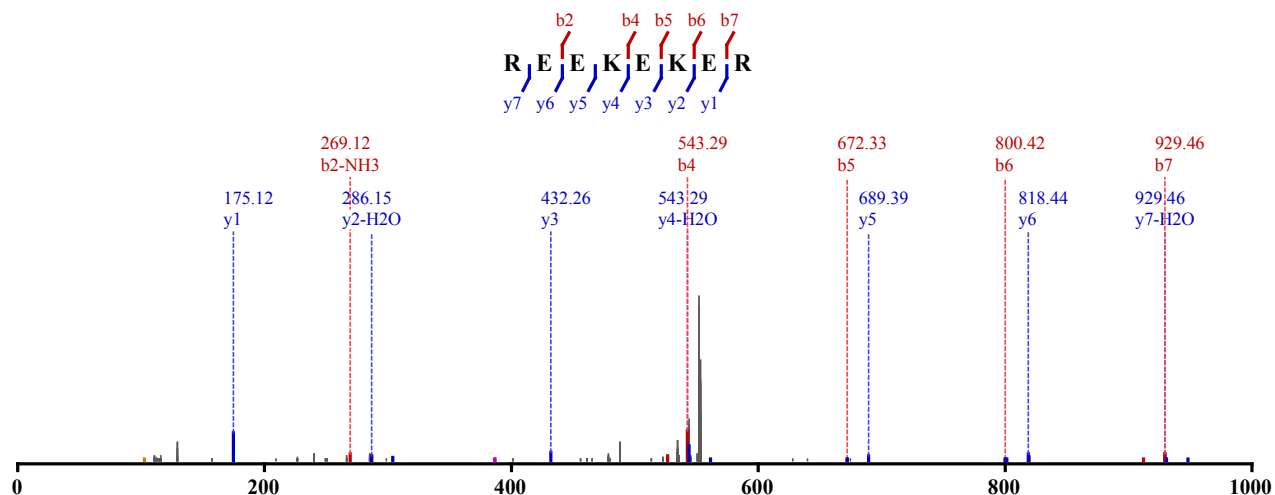

Not Modified  
 Identified in MSS270 with qvalue 0.00  
 Charge: 3, Exp. m/z: 368.532, Calc. m/z: 368.531

Data File: HeLa\_ArgC-AspN\_HCD\_2, Scans: 6996 - 6996

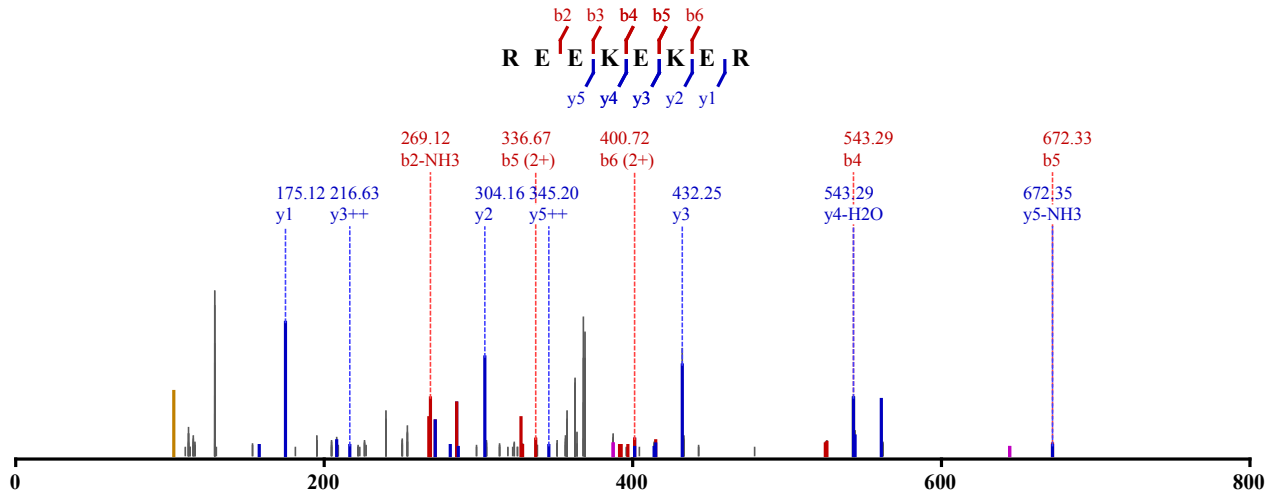

Not Modified

Identified in MSS270 with qvalue 0.00

Charge: 2, Exp. m/z: 552.294, Calc. m/z: 552.292

Data File: HeLa\_ArgC-AspN\_HCD\_2, Scans: 7001 - 7001

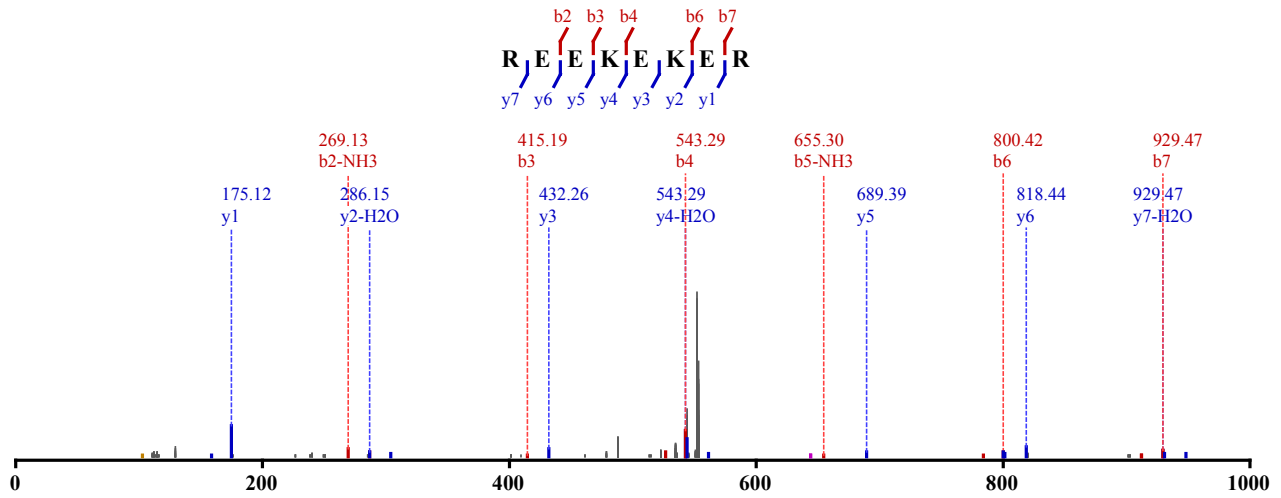

Not Modified

Identified in MSS270 with qvalue 0.00

Charge: 3, Exp. m/z: 368.532, Calc. m/z: 368.531

Data File: HeLa\_ArgC-AspN\_HCD\_3, Scans: 5622 - 5622

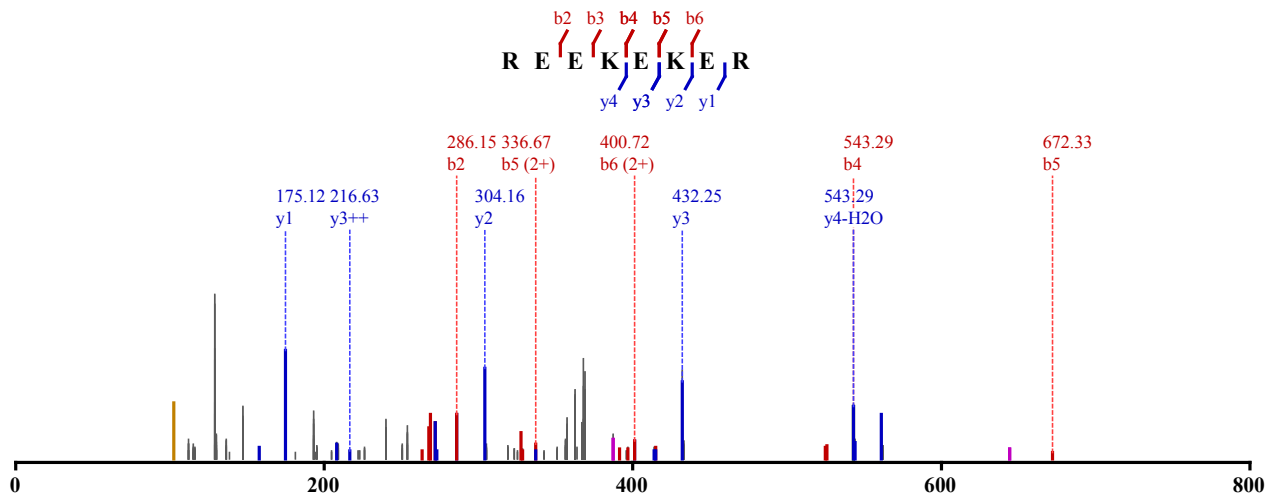

Not Modified

Identified in MSS270 with qvalue 0.00  
 Charge: 2, Exp. m/z: 552.294, Calc. m/z: 552.292  
 Data File: HeLa\_ArgC-AspN\_HCD\_3, Scans: 5624 - 5624

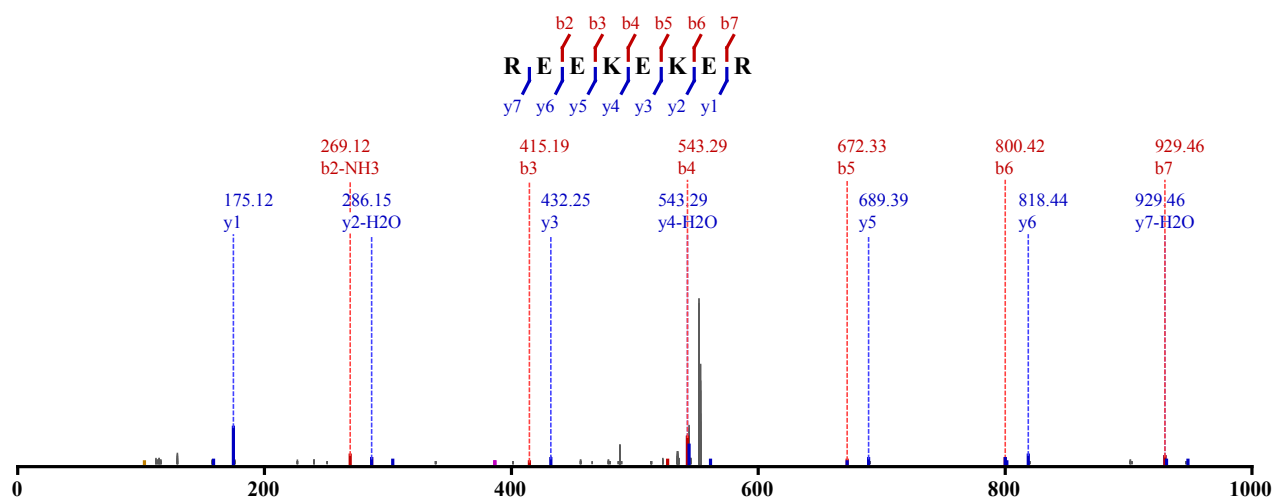

Not Modified  
 Identified in MSS271 with qvalue 0.00  
 Charge: 2, Exp. m/z: 552.294, Calc. m/z: 552.292  
 Data File: HeLa\_ArgC-Chytry\_HCD\_1, Scans: 6912 - 6912

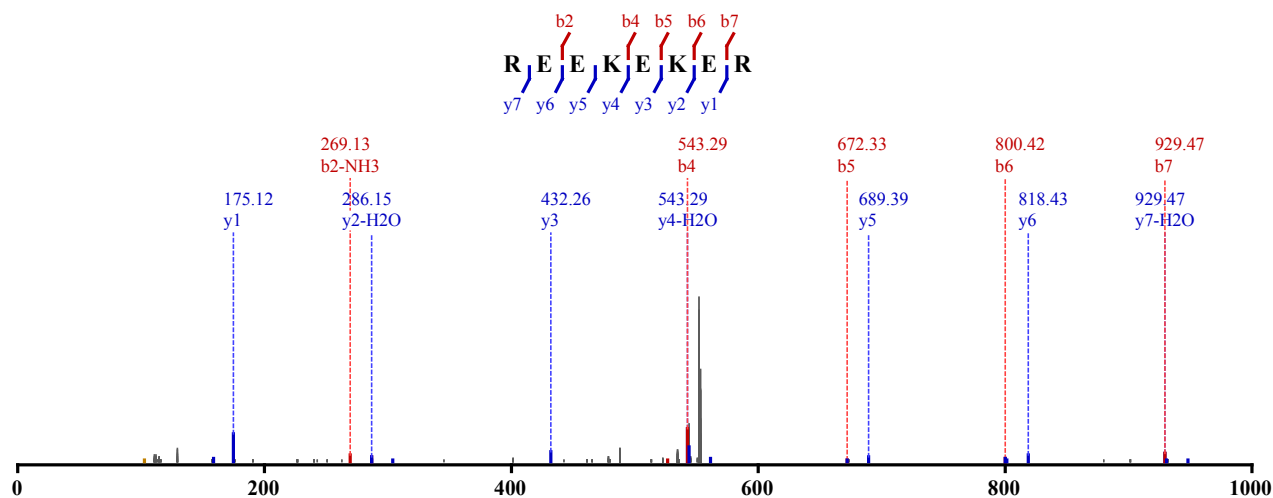

Not Modified  
 Identified in MSS271 with qvalue 0.00  
 Charge: 3, Exp. m/z: 368.532, Calc. m/z: 368.531  
 Data File: HeLa\_ArgC-Chytry\_HCD\_2, Scans: 6889 - 6889

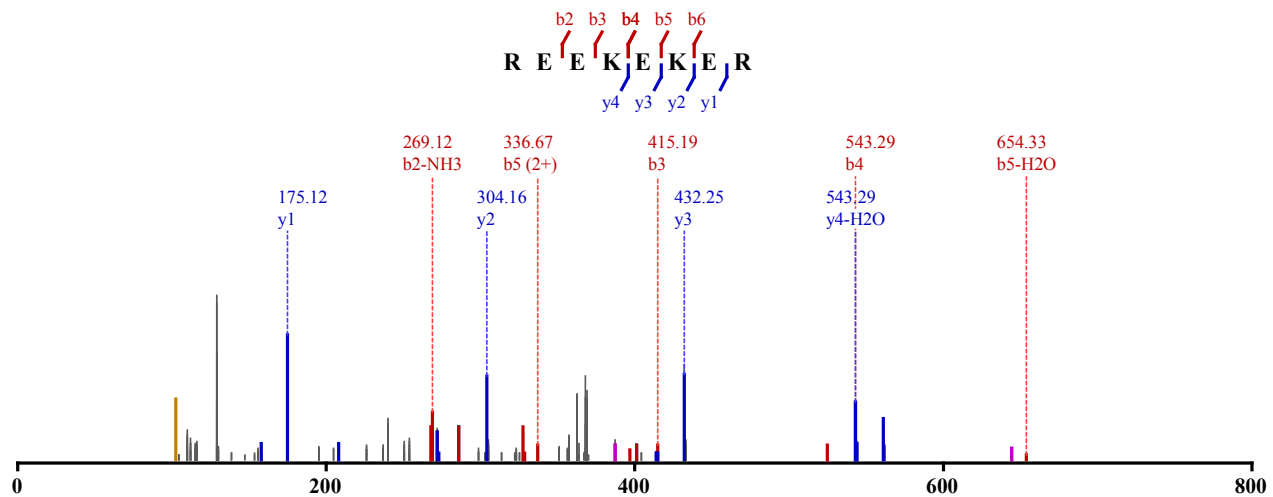

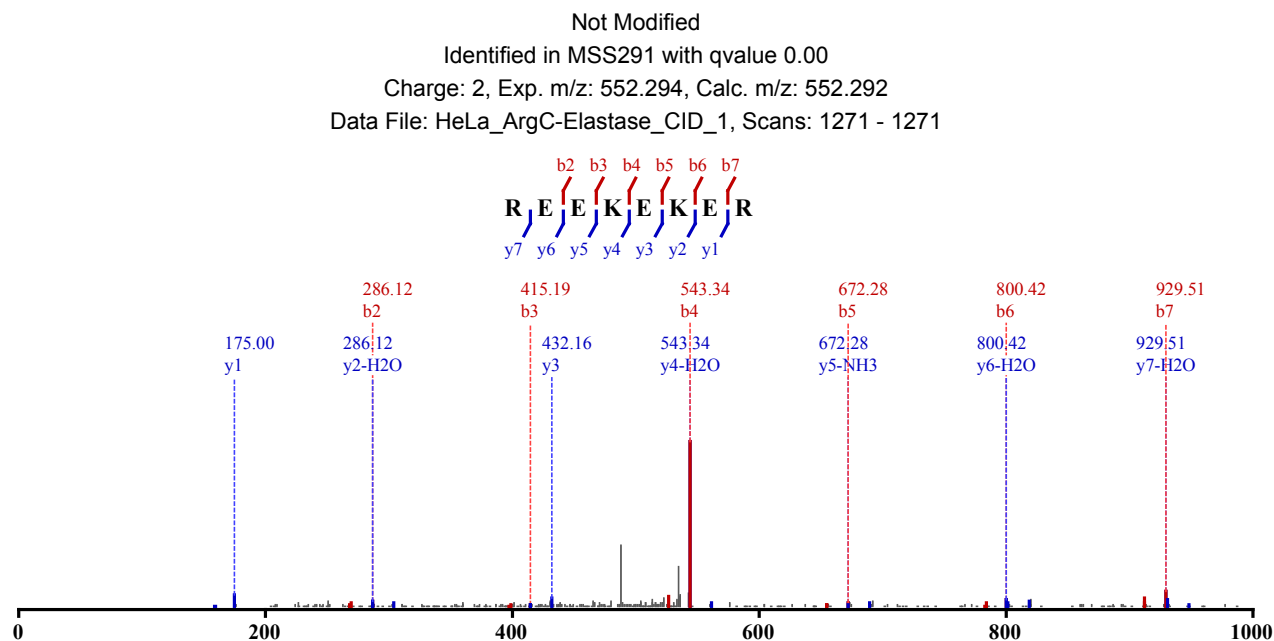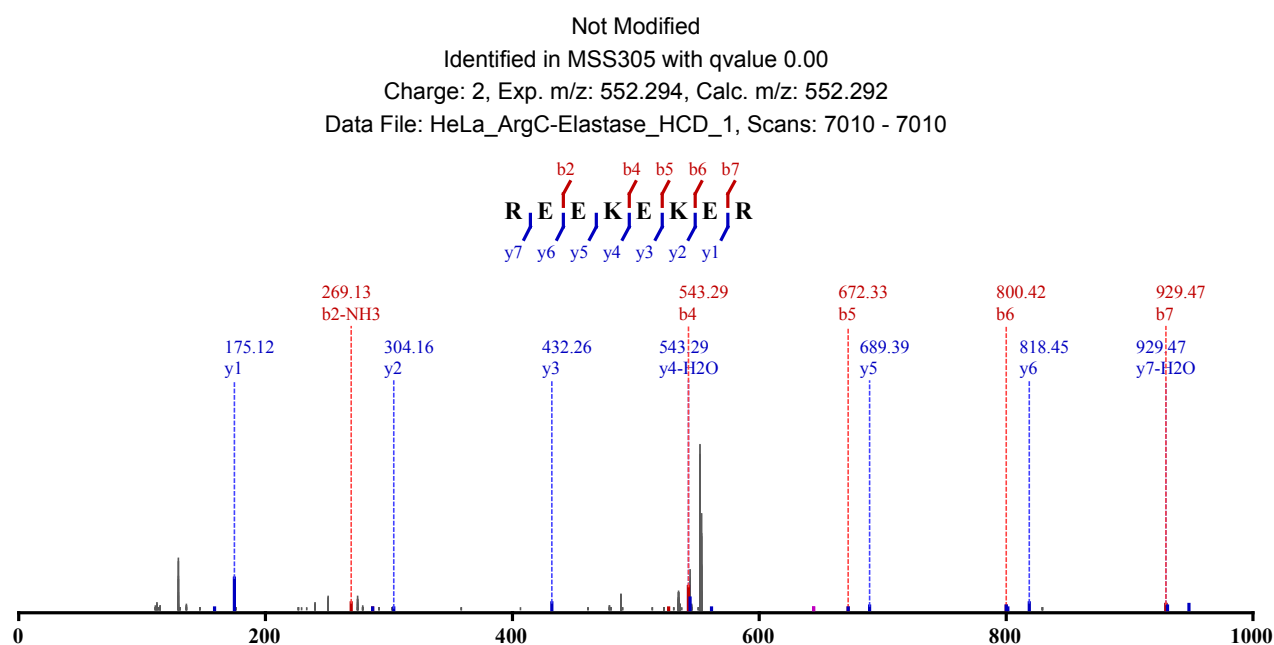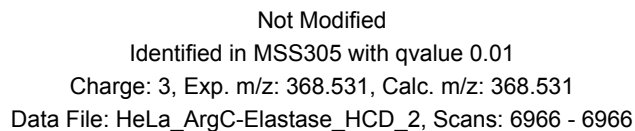

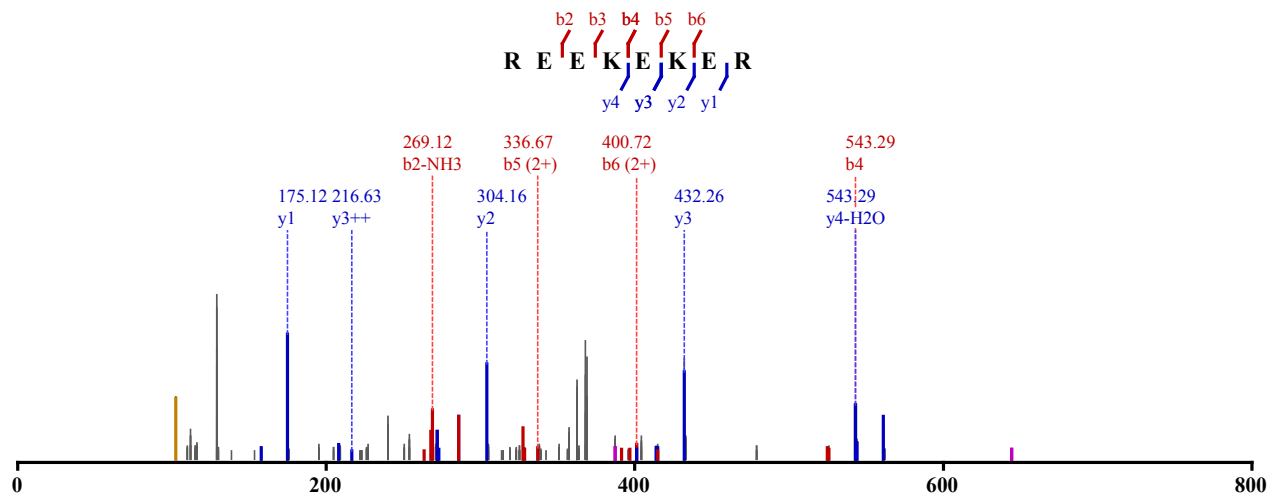

Not Modified  
 Identified in MSS305 with qvalue 0.00  
 Charge: 3, Exp. m/z: 368.532, Calc. m/z: 368.531  
 Data File: HeLa\_ArgC-Elastase\_HCD\_3, Scans: 5679 - 5679

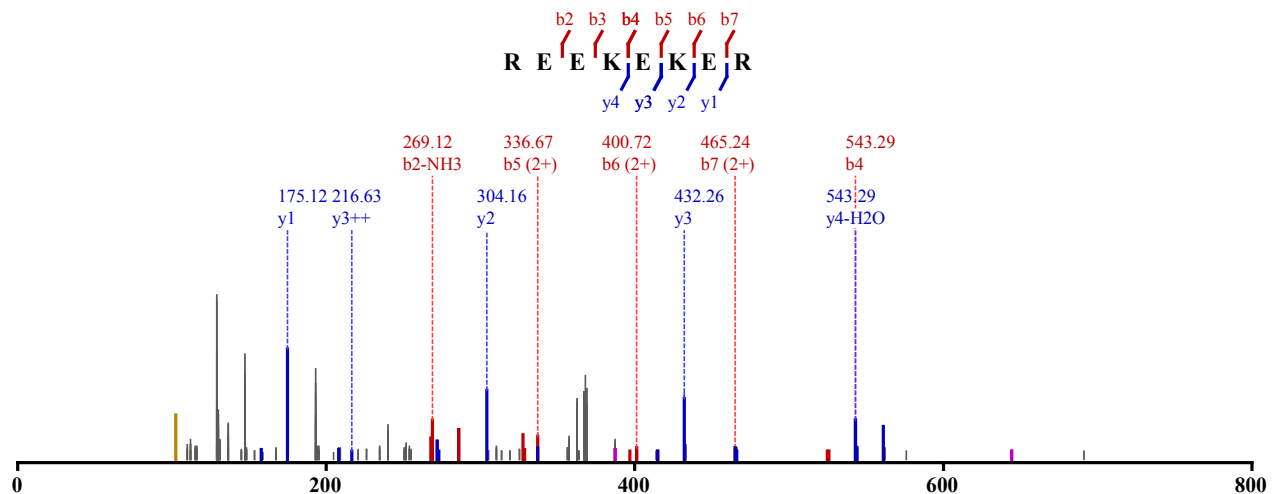

Not Modified  
 Identified in MSS305 with qvalue 0.00  
 Charge: 2, Exp. m/z: 552.294, Calc. m/z: 552.292  
 Data File: HeLa\_ArgC-Elastase\_HCD\_3, Scans: 5683 - 5683

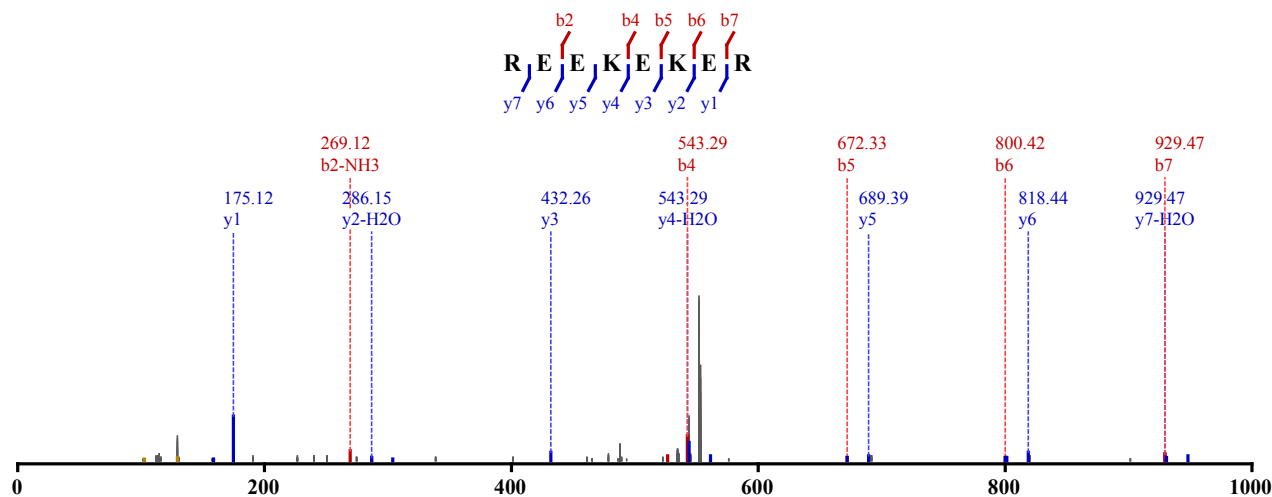

Not Modified  
 Identified in MSS416 with qvalue 0.00  
 Charge: 2, Exp. m/z: 552.294, Calc. m/z: 552.292



Data File: HeLa\_ArgC-Chytry\_CID-ETD\_1, Scans: 1362 - 1362

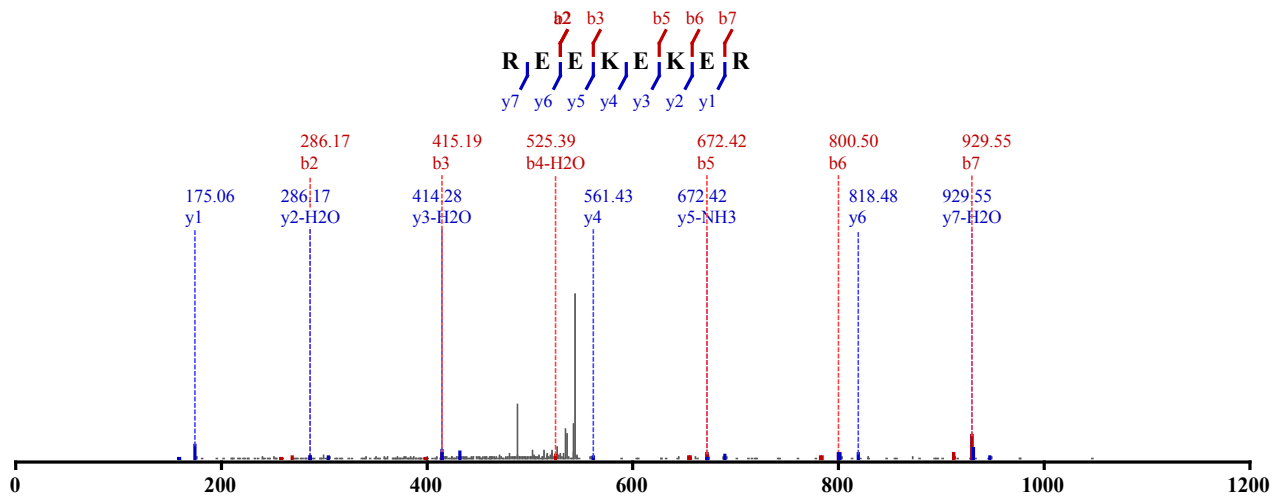

Not Modified

Identified in MSS417 with qvalue 0.00

Charge: 2, Exp. m/z: 552.294, Calc. m/z: 552.292

Data File: HeLa\_ArgC-Elastase\_CID-ETD\_1, Scans: 1466 - 1466

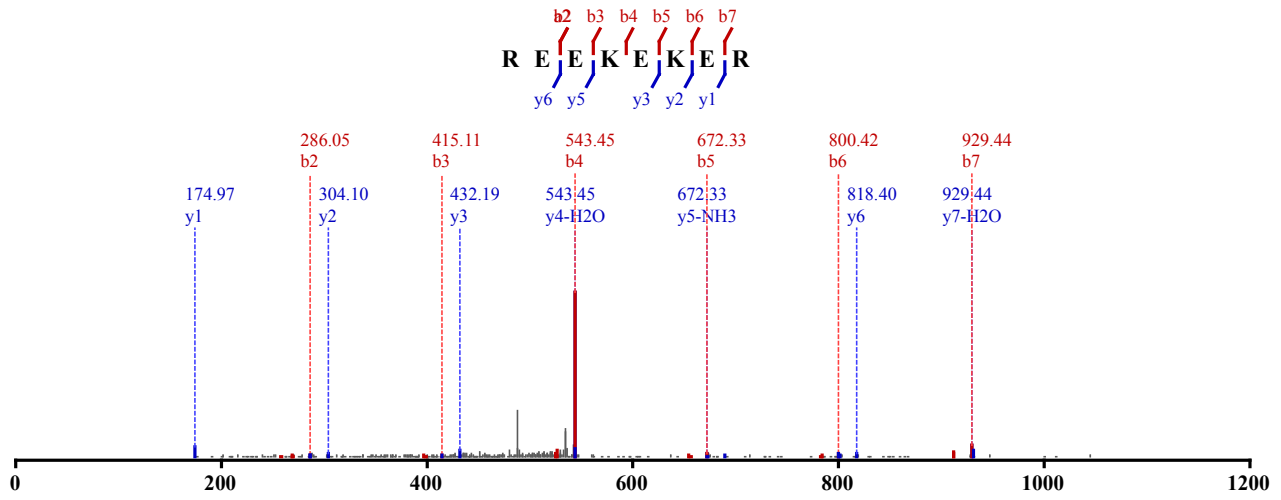

Not Modified

Identified in MSS485 with qvalue 0.00

Charge: 3, Exp. m/z: 507.904, Calc. m/z: 507.904

Data File: HeLa\_LysC\_pH4\_HCD\_3, Scans: 23829 - 23829

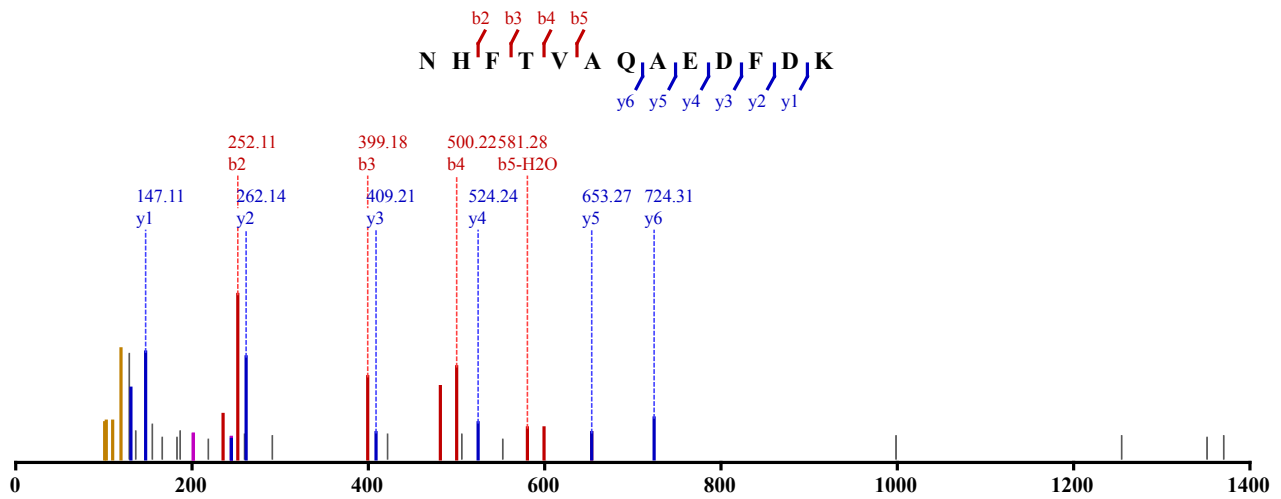

Not Modified

Identified in MSS480 with qvalue 0.00

Charge: 3, Exp. m/z: 820.347, Calc. m/z: 820.347

Data File: HeLa\_try\_pH2\_CID\_3xload\_2, Scans: 13983 - 13983

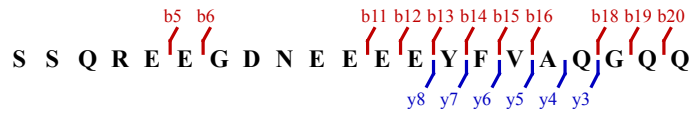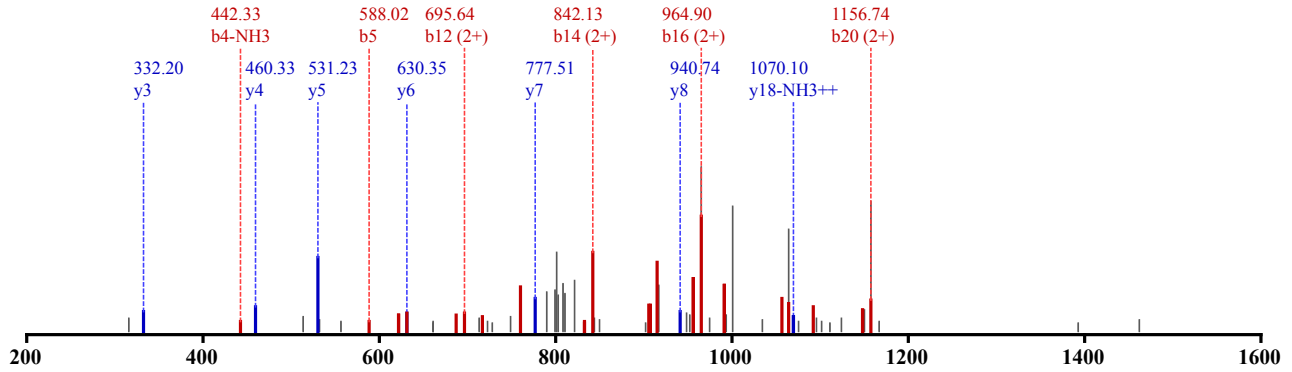

Not Modified

Identified in MSS480 with qvalue 0.00

Charge: 3, Exp. m/z: 820.347, Calc. m/z: 820.347

Data File: HeLa\_try\_pH2\_CID\_3xload\_3, Scans: 15745 - 15745

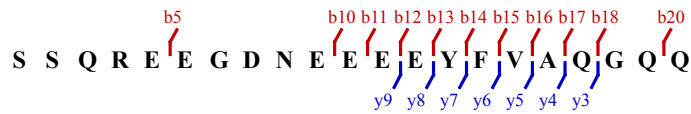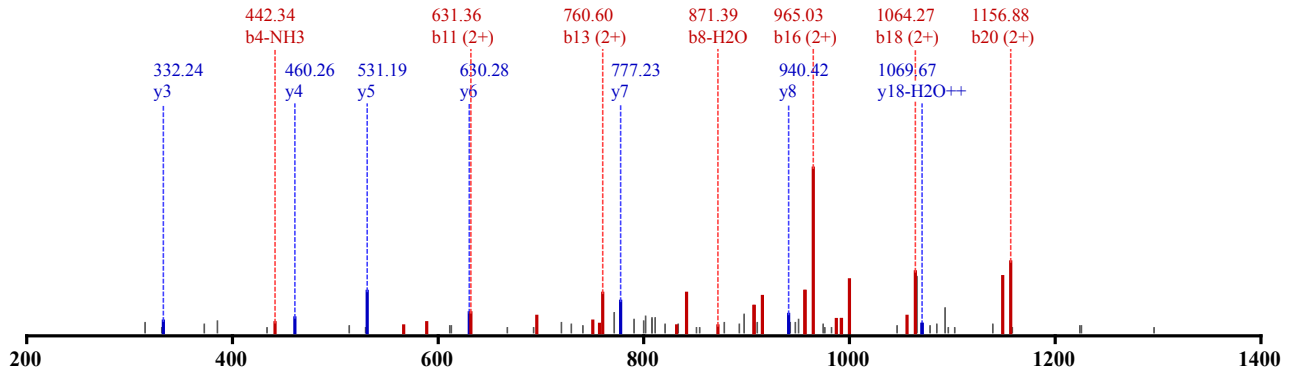

Not Modified

Identified in MSS480 with qvalue 0.00

Charge: 3, Exp. m/z: 820.347, Calc. m/z: 820.347

Data File: HeLa\_try\_pH2\_CID\_3xload, Scans: 13637 - 13637

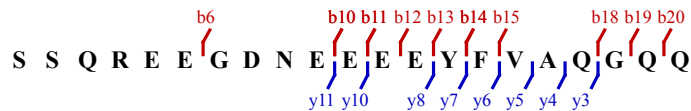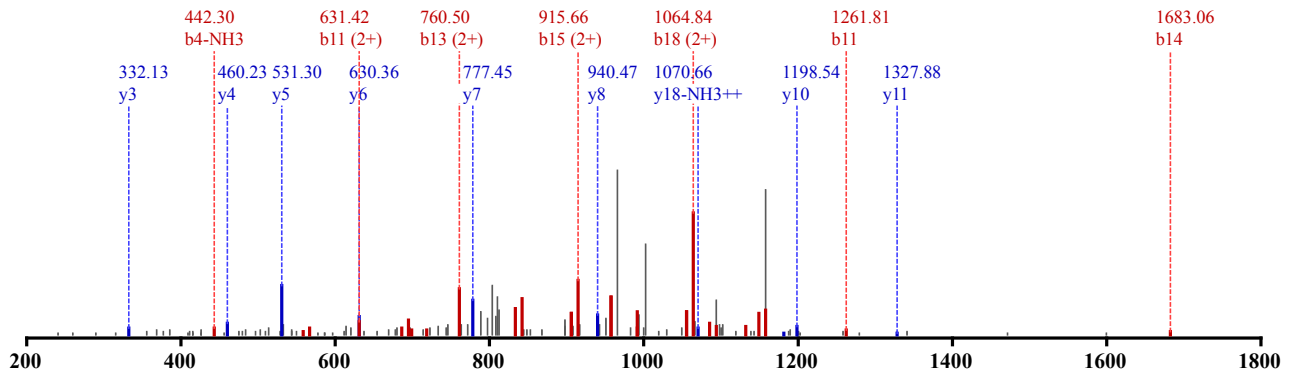

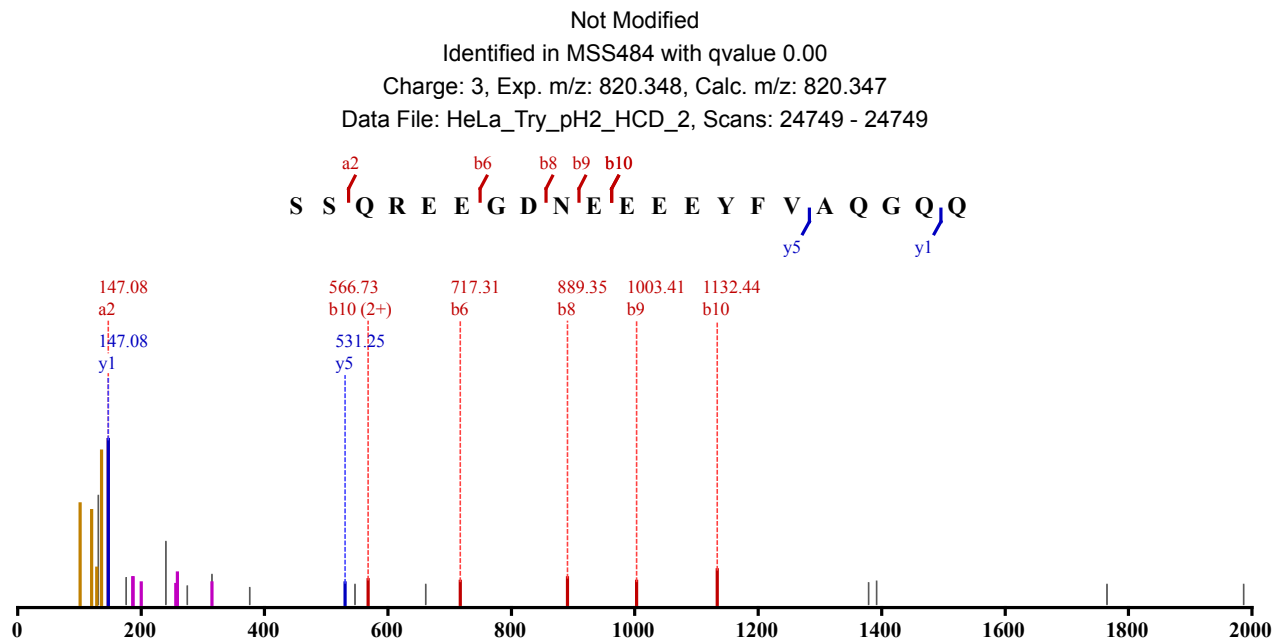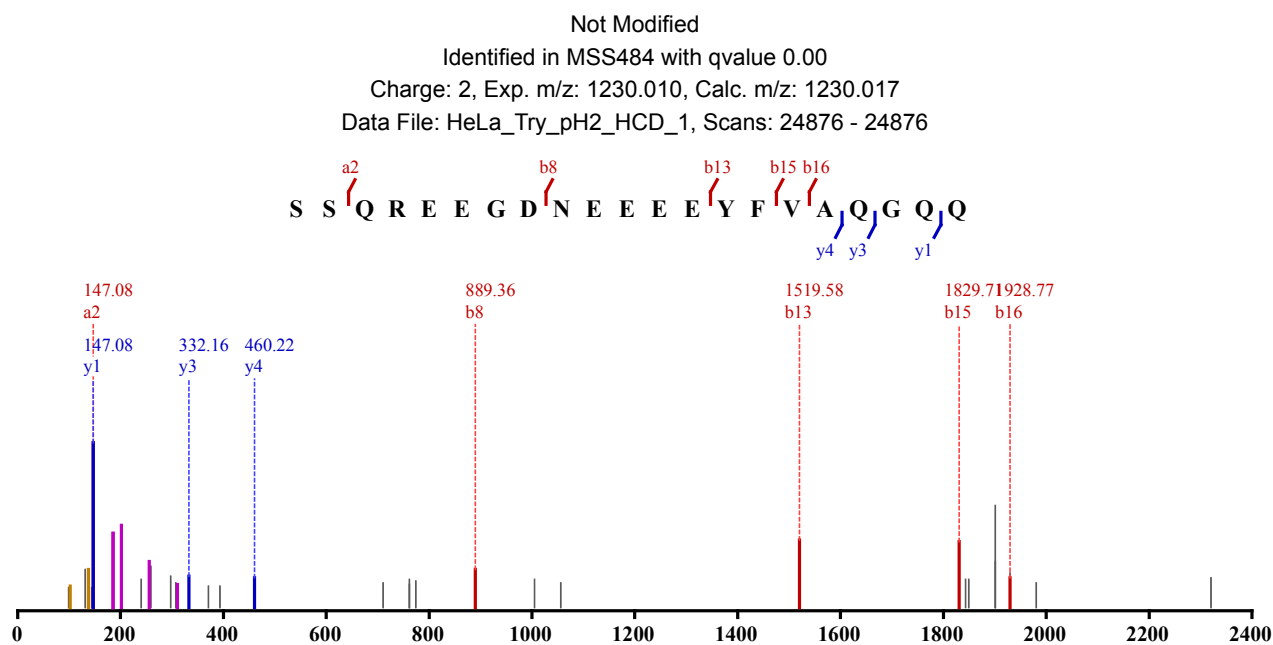

Not Modified  
 Identified in MSS488 with qvalue 0.00  
 Charge: 3, Exp. m/z: 820.344, Calc. m/z: 820.347  
 Data File: HeLa\_chy-try\_pH2\_CID\_3xload\_2, Scans: 14932 - 14932

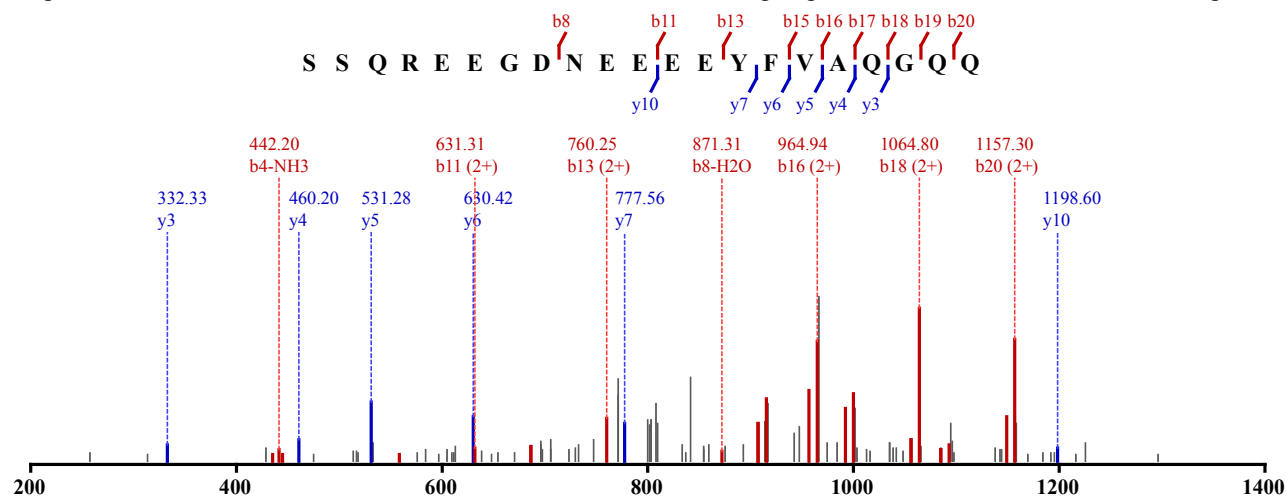

Not Modified  
 Identified in MSS480 with qvalue 0.00  
 Charge: 4, Exp. m/z: 983.190, Calc. m/z: 983.190  
 Data File: HeLa\_try\_pH3\_CID\_3xload, Scans: 23658 - 23658

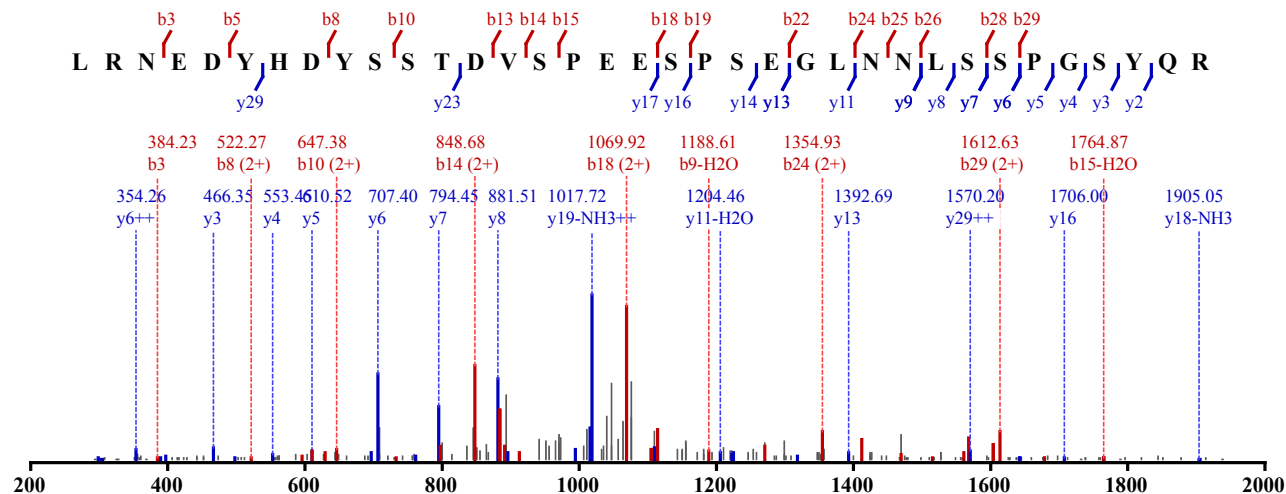

Not Modified  
 Identified in MSS480 with qvalue 0.00  
 Charge: 4, Exp. m/z: 983.438, Calc. m/z: 983.190  
 Data File: HeLa\_try\_pH3\_CID\_3xload, Scans: 23675 - 23675

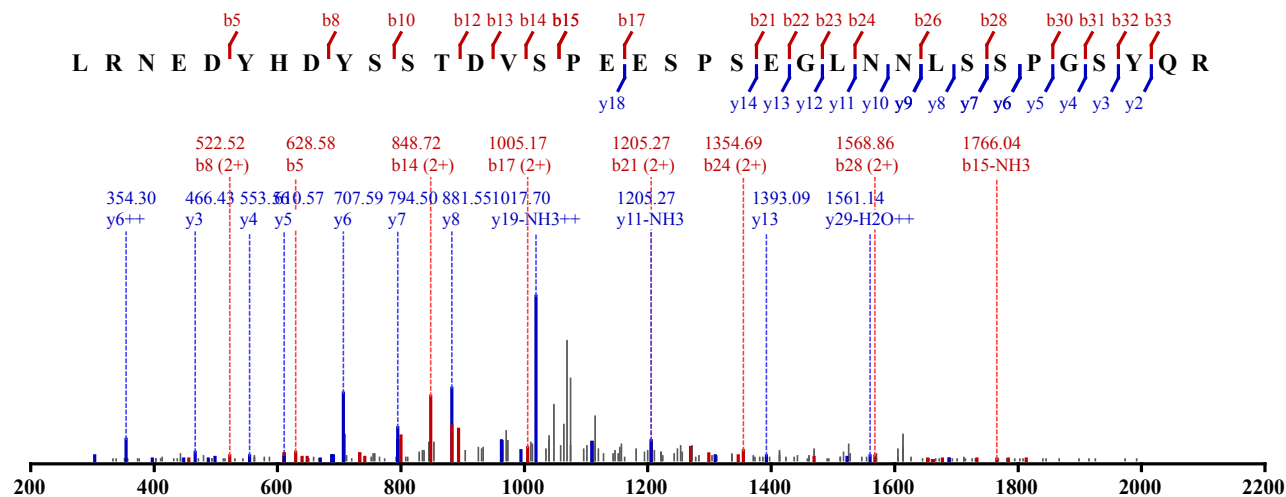

Not Modified  
 Identified in MSS480 with qvalue 0.00  
 Charge: 2, Exp. m/z: 772.930, Calc. m/z: 772.427

Data File: HeLa\_try\_pH5\_CID\_3xload\_2, Scans: 43056 - 43056

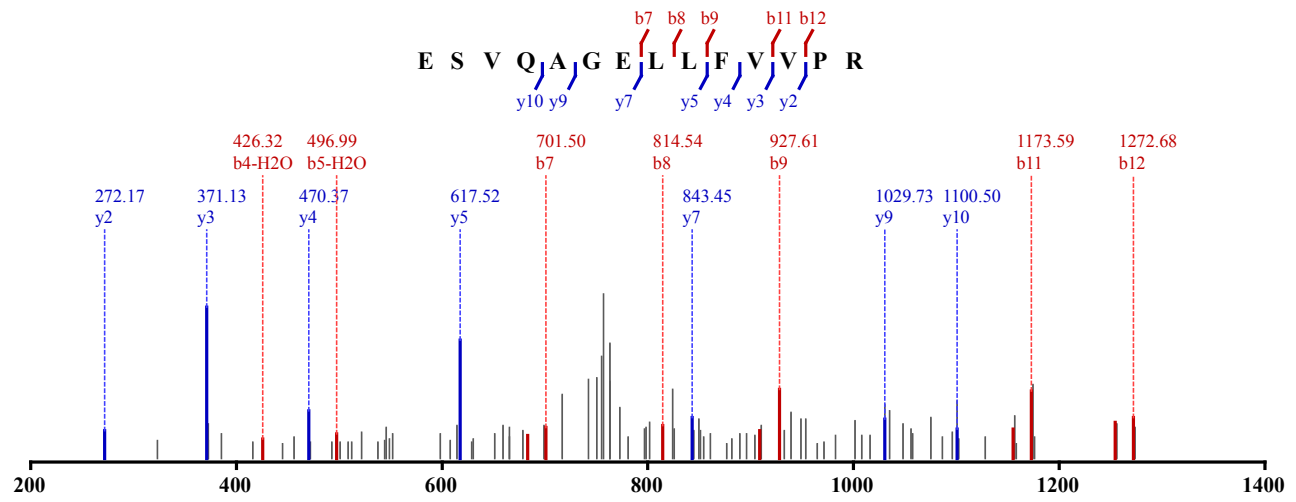

Not Modified

Identified in MSS480 with qvalue 0.00

Charge: 2, Exp. m/z: 772.429, Calc. m/z: 772.427

Data File: HeLa\_try\_pH5\_CID\_3xload, Scans: 39968 - 39968

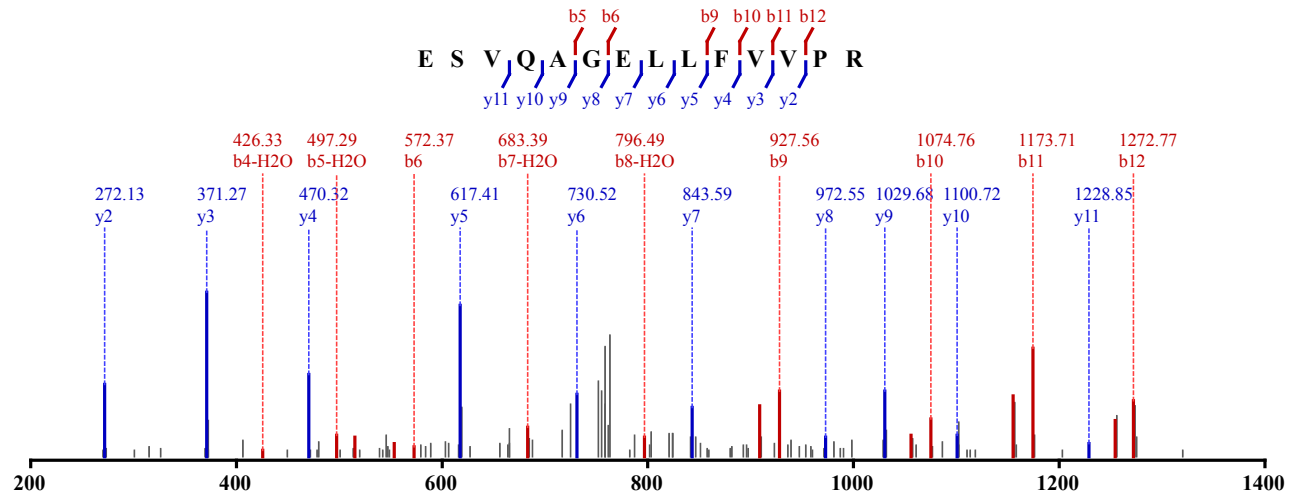

Not Modified

Identified in MSS480 with qvalue 0.00

Charge: 2, Exp. m/z: 772.429, Calc. m/z: 772.427

Data File: HeLa\_try\_pH6\_CID\_3xload\_2, Scans: 47838 - 47838

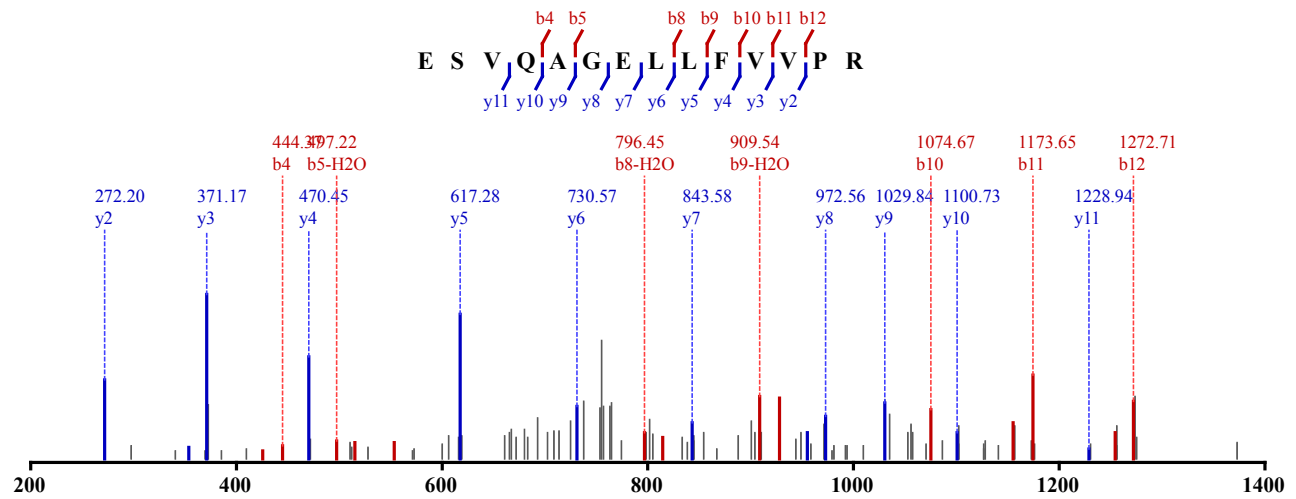

Not Modified

Identified in MSS480 with qvalue 0.00  
 Charge: 2, Exp. m/z: 772.930, Calc. m/z: 772.427  
 Data File: HeLa\_try\_pH6\_CID\_3xload\_2, Scans: 47894 - 47894

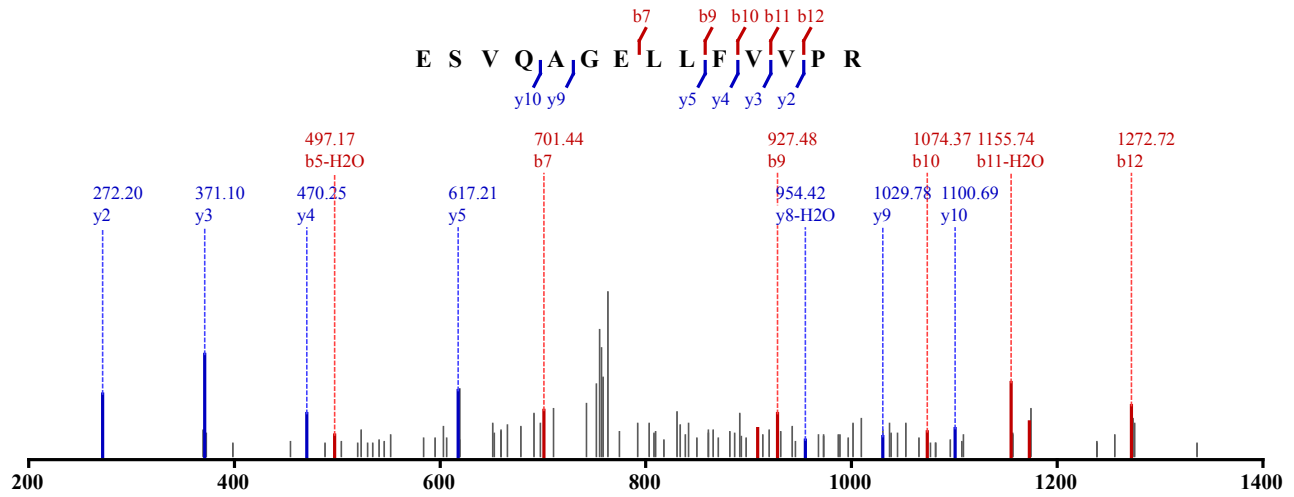

Not Modified  
 Identified in MSS480 with qvalue 0.00  
 Charge: 3, Exp. m/z: 515.287, Calc. m/z: 515.287  
 Data File: HeLa\_try\_pH6\_CID\_3xload\_3, Scans: 49800 - 49800

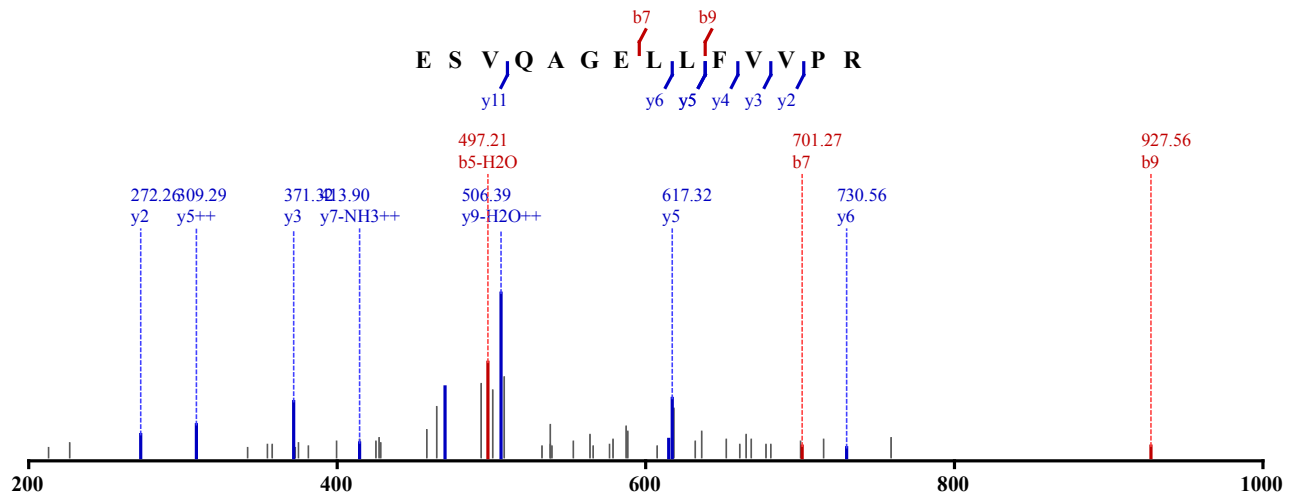

Not Modified  
 Identified in MSS480 with qvalue 0.00  
 Charge: 2, Exp. m/z: 772.930, Calc. m/z: 772.427  
 Data File: HeLa\_try\_pH8\_CID\_3xload\_2, Scans: 49996 - 49996

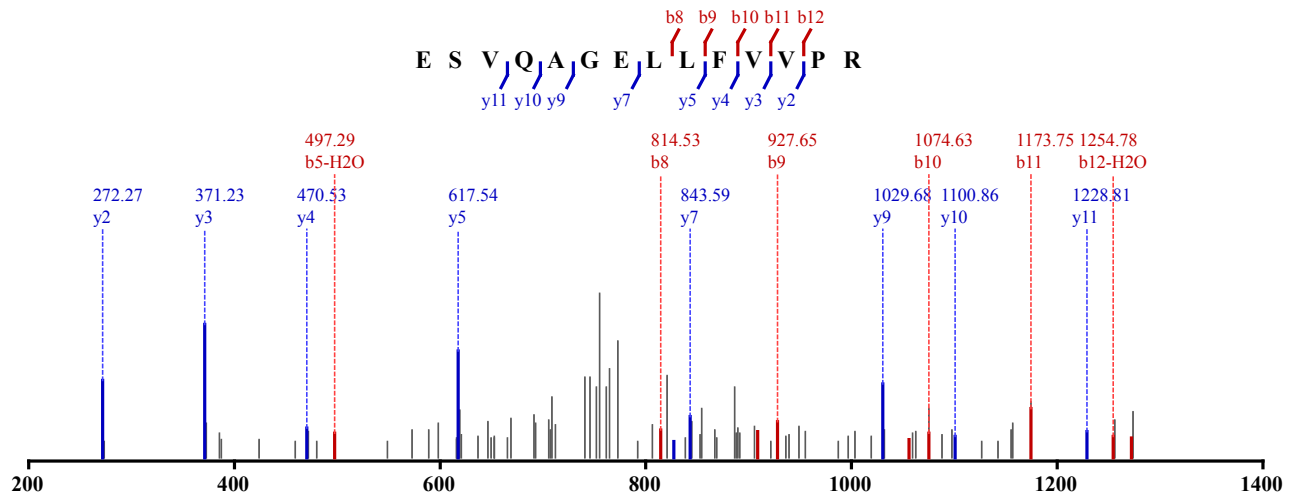

Not Modified

Identified in MSS480 with qvalue 0.00

Charge: 3, Exp. m/z: 515.286, Calc. m/z: 515.287

Data File: HeLa\_try\_pH8\_CID\_3xload\_3, Scans: 59814 - 59814

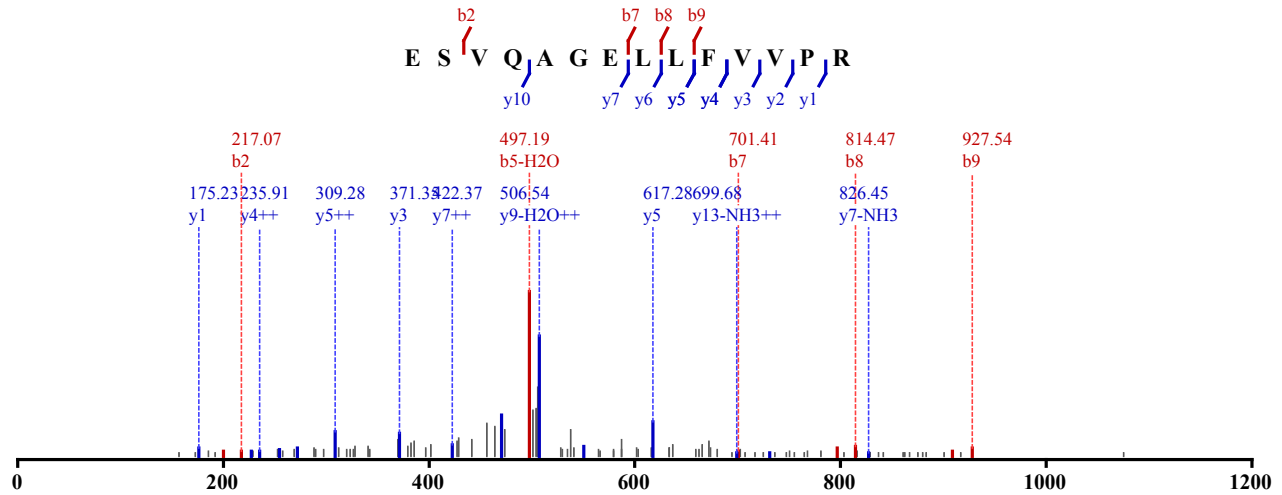

Not Modified

Identified in MSS480 with qvalue 0.00

Charge: 2, Exp. m/z: 772.429, Calc. m/z: 772.427

Data File: HeLa\_try\_pH8\_CID\_3xload\_3, Scans: 59818 - 59818

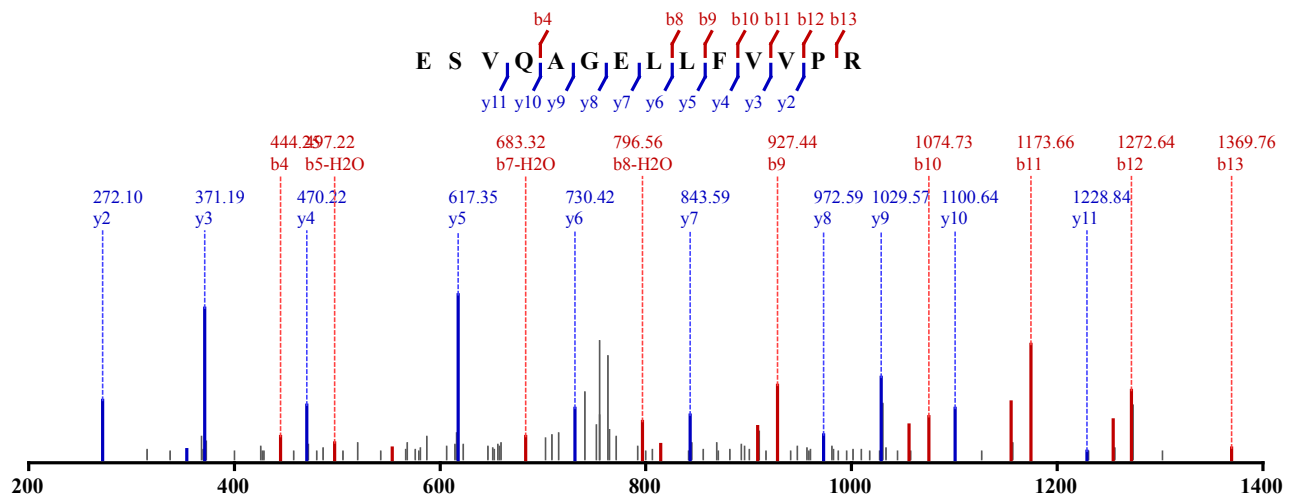

Not Modified

Identified in MSS480 with qvalue 0.00

Charge: 2, Exp. m/z: 772.428, Calc. m/z: 772.427

Data File: HeLa\_try\_pH8\_CID\_3xload\_3, Scans: 59886 - 59886

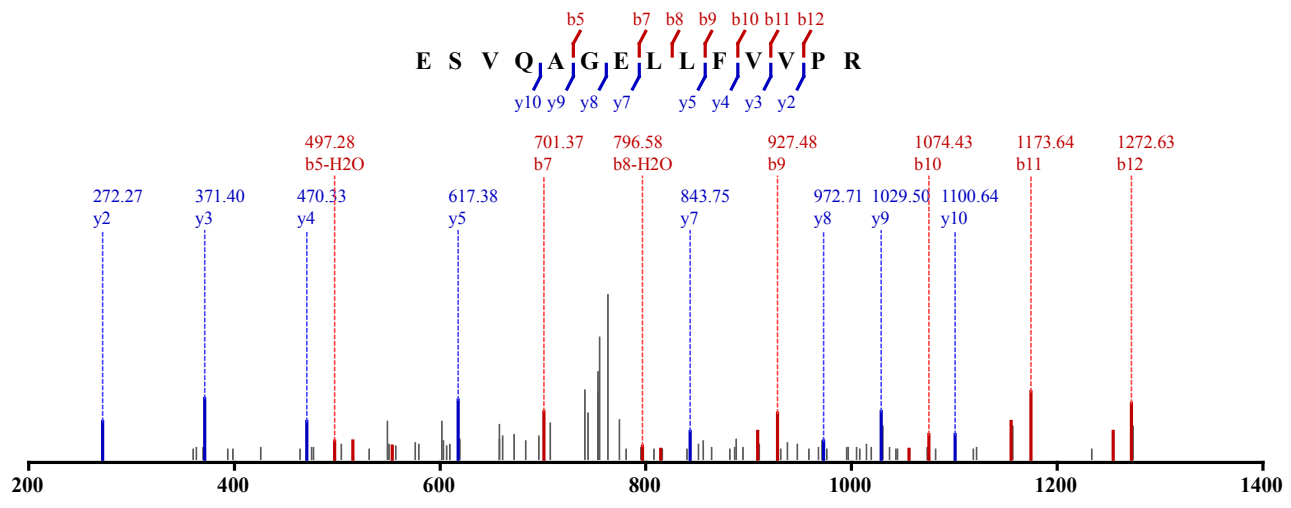

Not Modified  
 Identified in MSS480 with qvalue 0.00  
 Charge: 2, Exp. m/z: 772.429, Calc. m/z: 772.427  
 Data File: HeLa\_try\_pH8\_CID\_3xload, Scans: 47110 - 47110

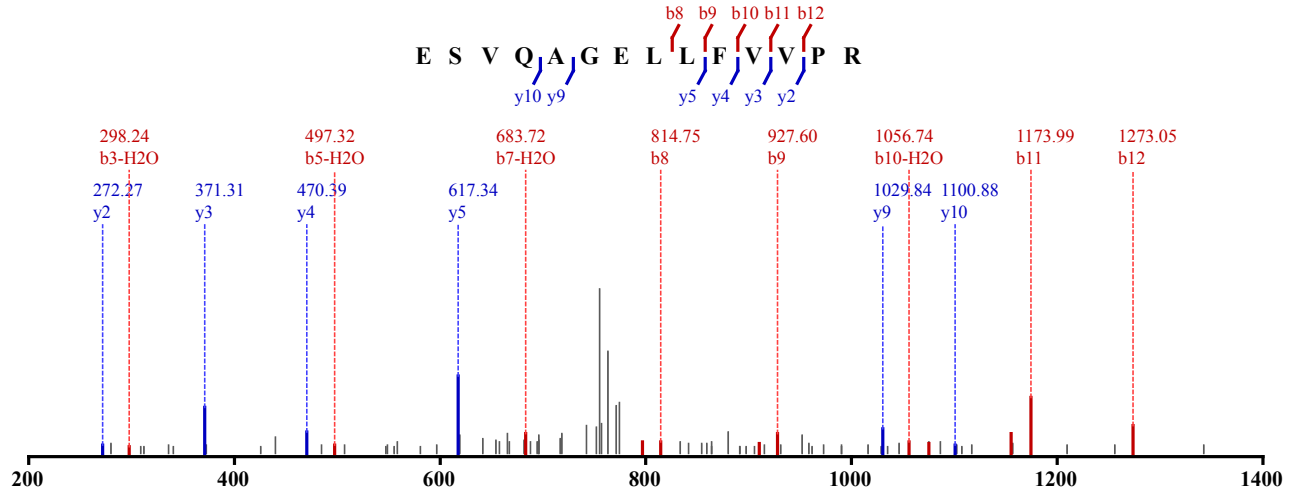

Not Modified  
 Identified in MSS480 with qvalue 0.00  
 Charge: 2, Exp. m/z: 772.928, Calc. m/z: 772.427  
 Data File: HeLa\_try\_pH8\_CID\_3xload, Scans: 47155 - 47155

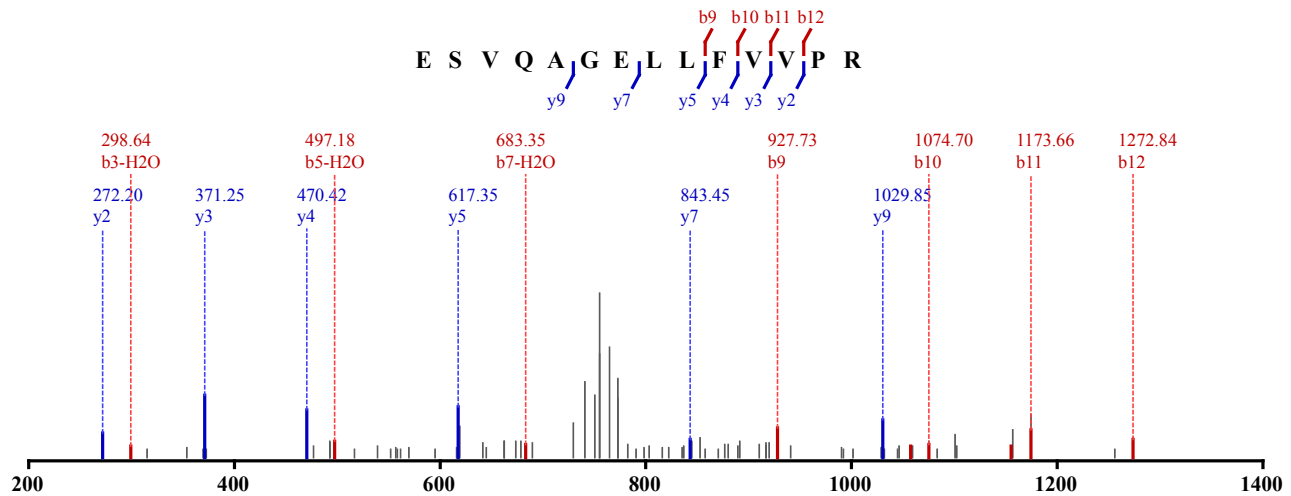

Not Modified  
 Identified in MSS480 with qvalue 0.00  
 Charge: 2, Exp. m/z: 772.427, Calc. m/z: 772.427



Data File: HeLa\_try\_pH8\_CID\_3xload, Scans: 47268 - 47268

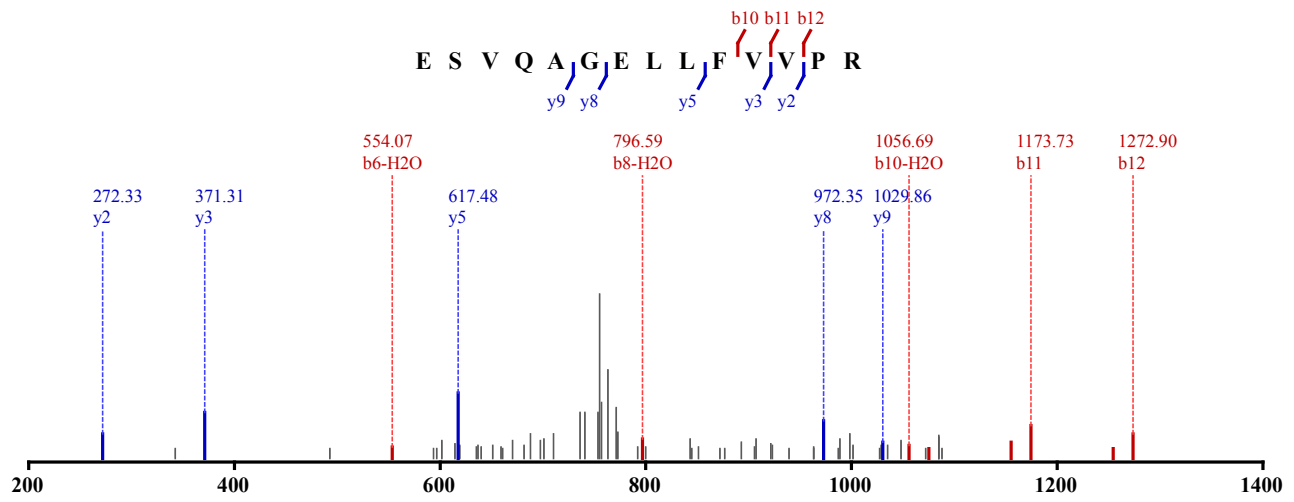

Not Modified  
 Identified in MSS484 with qvalue 0.00  
 Charge: 2, Exp. m/z: 772.427, Calc. m/z: 772.427  
 Data File: HeLa\_Try\_pH6\_HCD\_1, Scans: 58302 - 58302

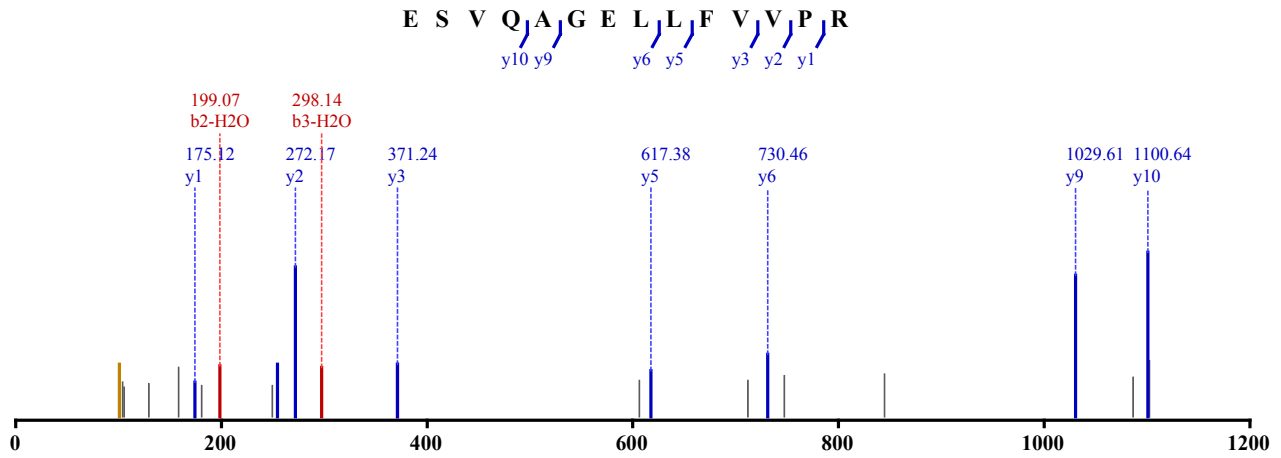

Not Modified  
 Identified in MSS484 with qvalue 0.01  
 Charge: 2, Exp. m/z: 772.427, Calc. m/z: 772.427  
 Data File: HeLa\_Try\_pH6\_HCD\_2, Scans: 57187 - 57187

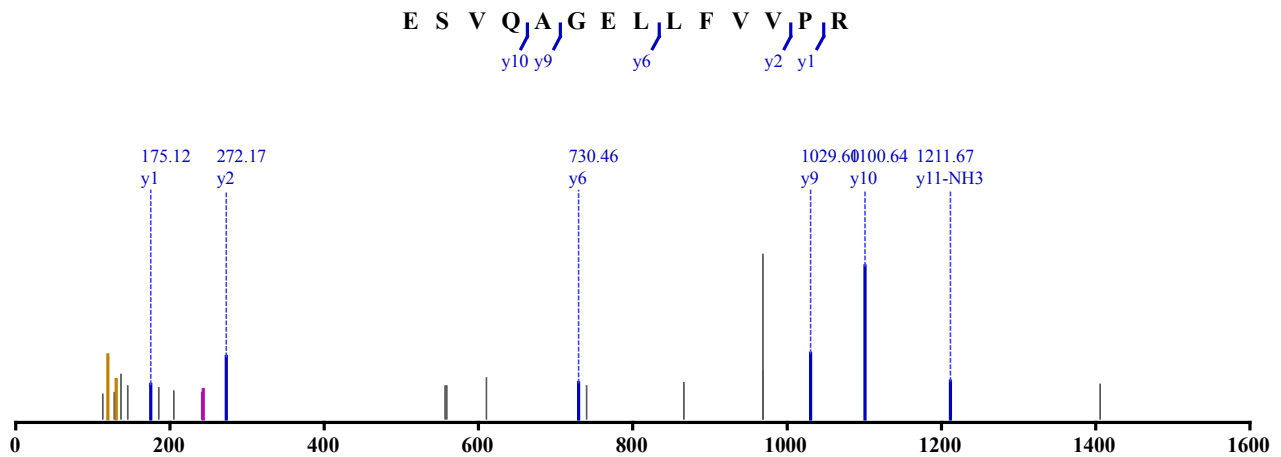

Not Modified

Identified in MSS484 with qvalue 0.00  
 Charge: 2, Exp. m/z: 772.429, Calc. m/z: 772.427  
 Data File: HeLa\_Try\_pH6\_HCD\_3, Scans: 55661 - 55661

**E S V Q A G E L L F V V P R**  
 y10 y9 y5 y2 y1

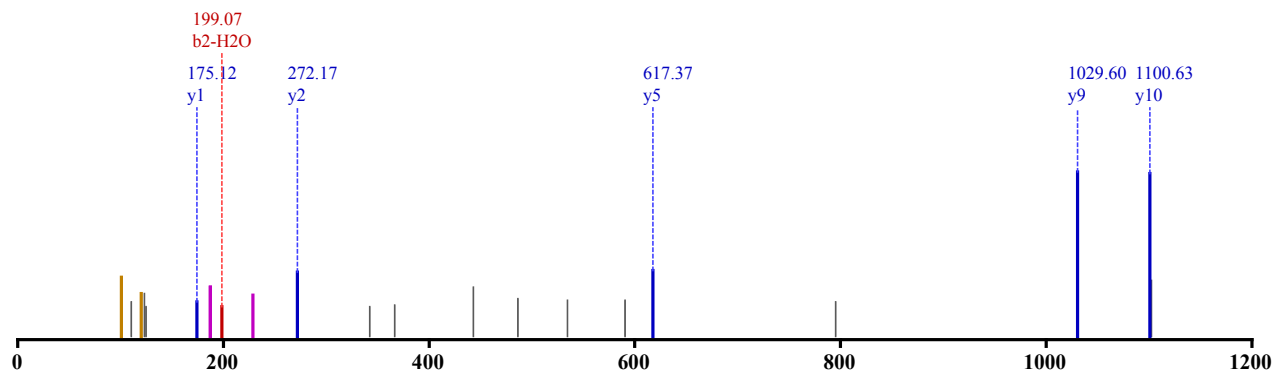

Not Modified  
 Identified in MSS484 with qvalue 0.00  
 Charge: 2, Exp. m/z: 772.430, Calc. m/z: 772.427  
 Data File: HeLa\_Try\_pH8\_HCD\_1, Scans: 59444 - 59444

**E S V Q A G E L L F V V P R**  
 y10 y9 y6 y5 y2 y1

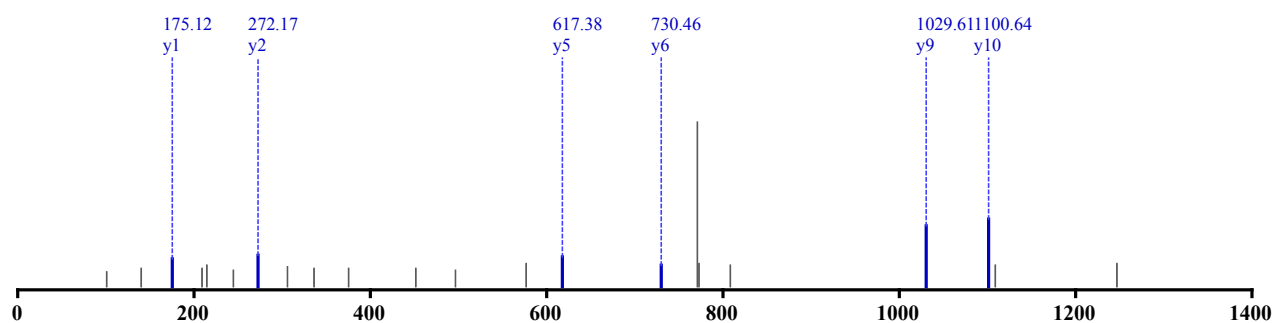

1 x Oxidation (M)  
 Identified in MSS483 with qvalue 0.01  
 Charge: 2, Exp. m/z: 917.440, Calc. m/z: 917.437  
 Data File: HeLa\_AspN\_pH11\_CID\_3xload, Scans: 33522 - 33522

**D K P L T F P S P N S A M E N G L**  
 y15 y13 y12 y11 y9 y6 b5 b6 b8 b10 b11 b12 b13 b14

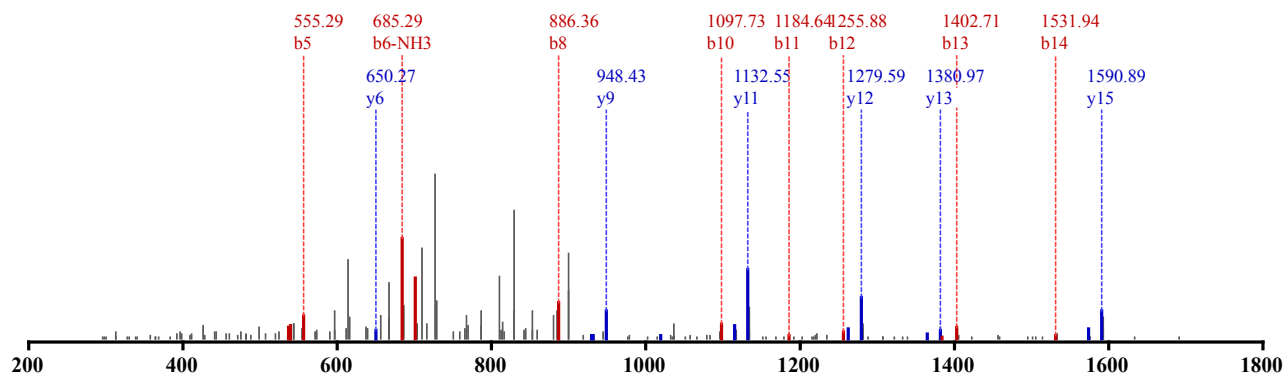

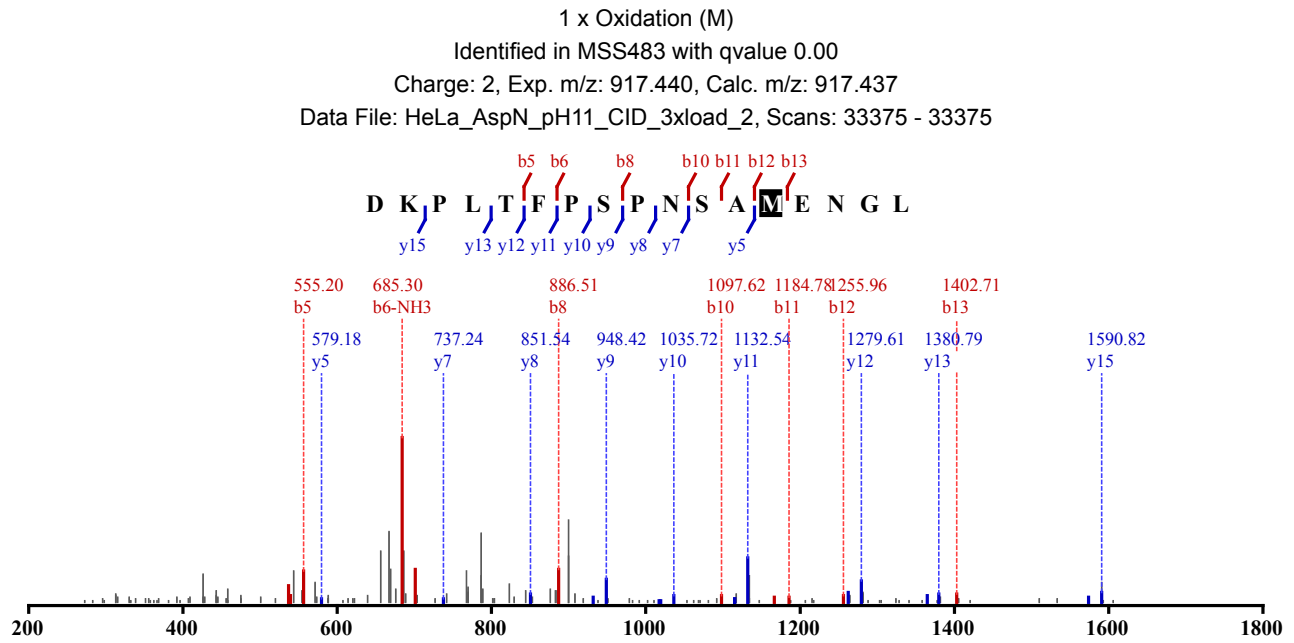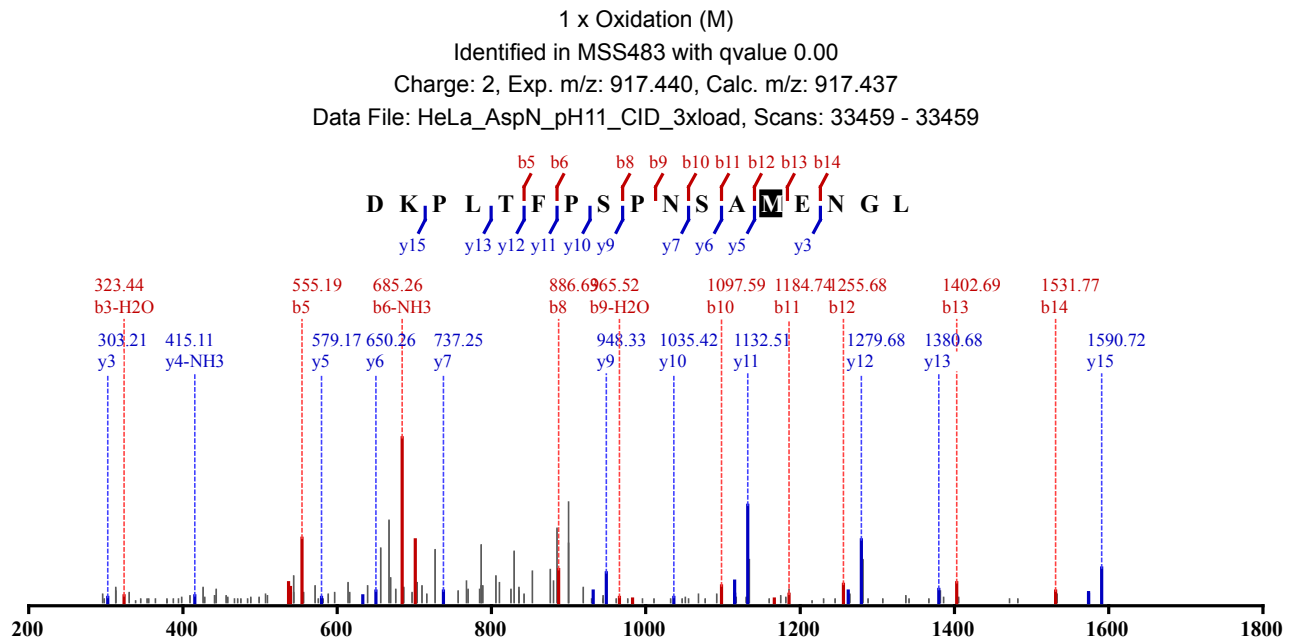

1 x Oxidation (M)  
 Identified in MSS483 with qvalue 0.00  
 Charge: 2, Exp. m/z: 917.440, Calc. m/z: 917.437  
 Data File: HeLa\_AspN\_pH8\_CID\_3xload, Scans: 30594 - 30594

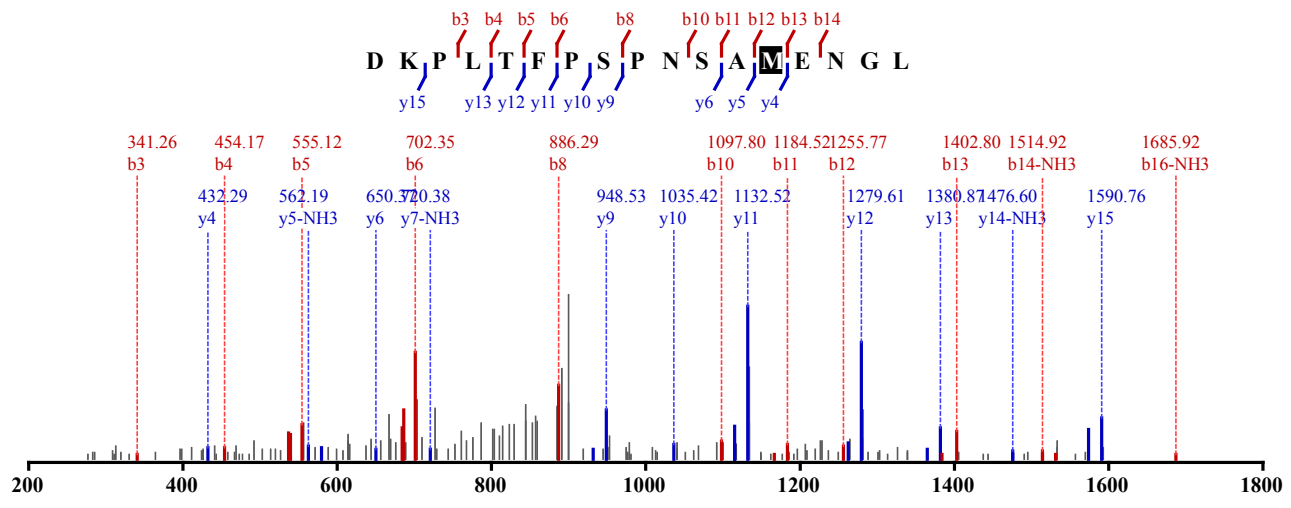

2 x Carbamidomethyl (C) 1 x Oxidation (M)  
 Identified in MSS479 with qvalue 0.00  
 Charge: 3, Exp. m/z: 1010.880, Calc. m/z: 1010.207  
 Data File: HeLa\_AspN\_pH5\_HCD\_3, Scans: 38473 - 38473

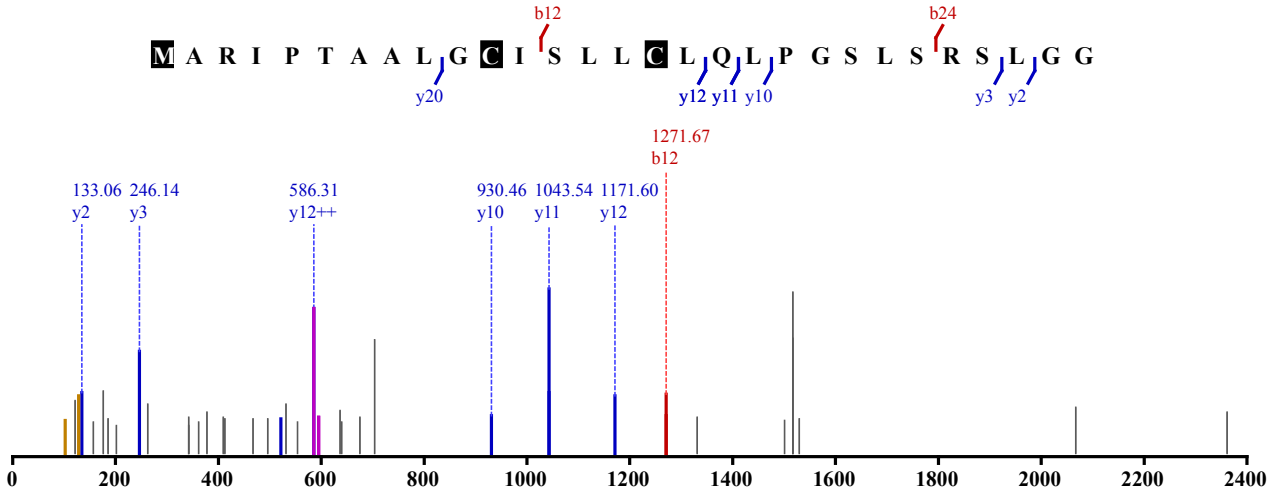

2 x Carbamidomethyl (C) 1 x Oxidation (M)  
 Identified in MSS479 with qvalue 0.00  
 Charge: 3, Exp. m/z: 1010.880, Calc. m/z: 1010.207  
 Data File: HeLa\_AspN\_pH6\_HCD\_1, Scans: 42677 - 42677

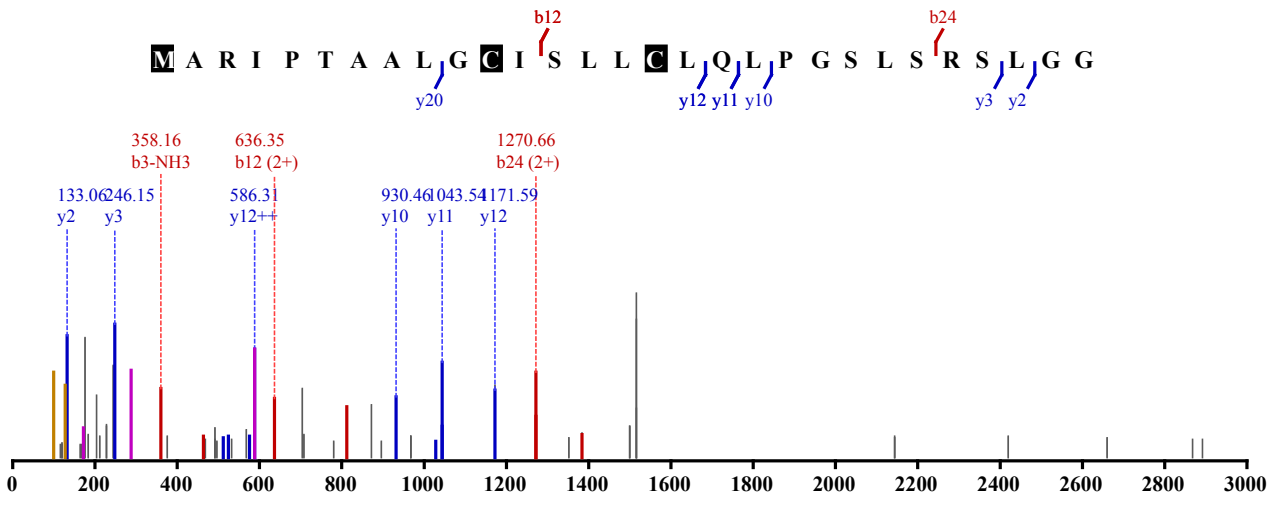

2 x Carbamidomethyl (C) 1 x Oxidation (M)  
 Identified in MSS479 with qvalue 0.00  
 Charge: 3, Exp. m/z: 1010.880, Calc. m/z: 1010.207

Data File: HeLa\_AspN\_pH6\_HCD\_2, Scans: 42255 - 42255

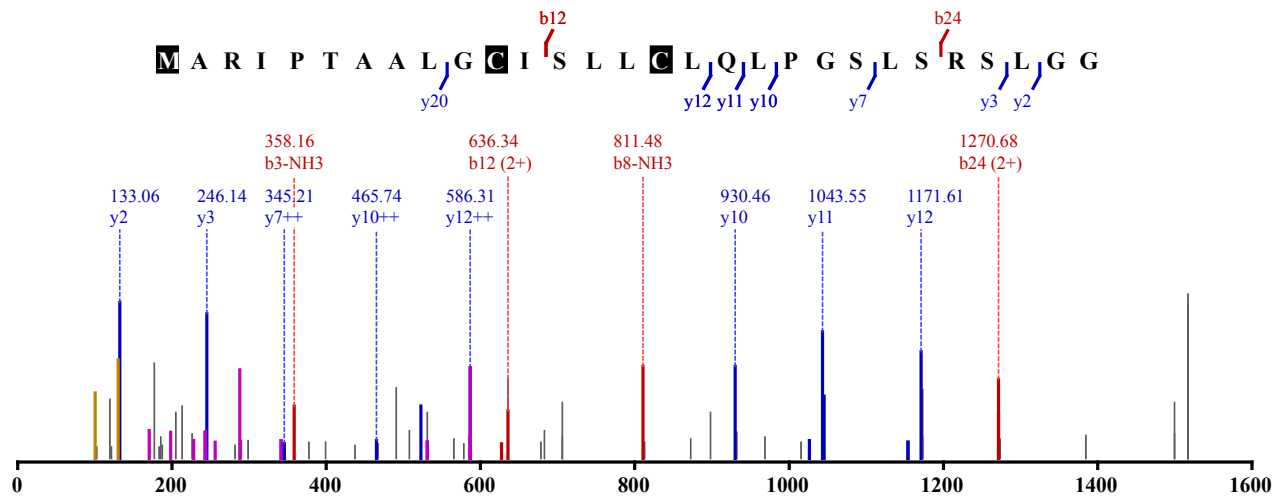

2 x Carbamidomethyl (C) 1 x Oxidation (M)  
 Identified in MSS479 with qvalue 0.00  
 Charge: 3, Exp. m/z: 1010.880, Calc. m/z: 1010.207  
 Data File: HeLa\_AspN\_pH6\_HCD\_3, Scans: 41283 - 41283

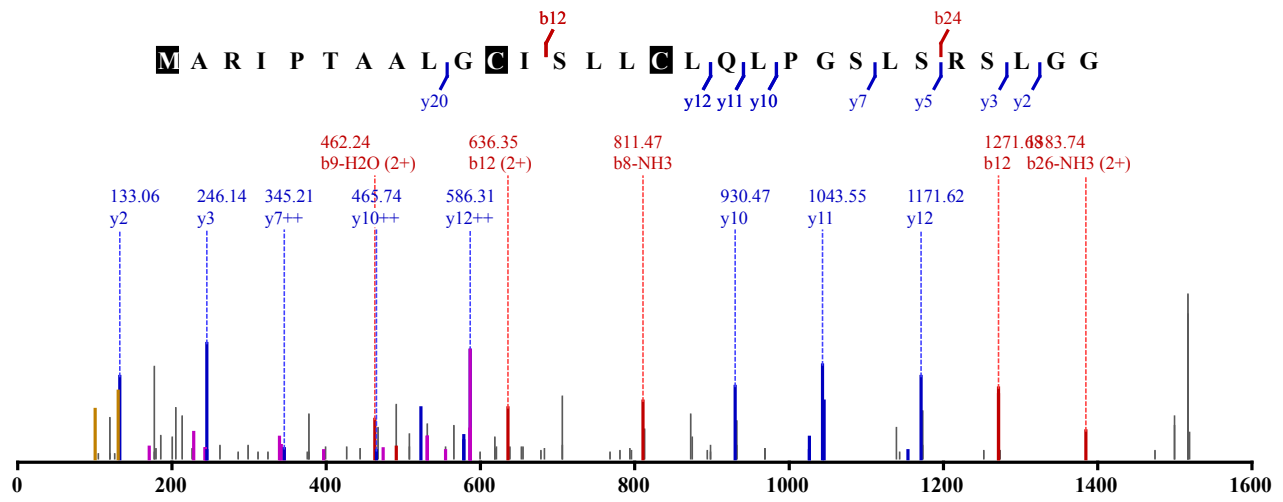

Not Modified  
 Identified in MSS127 with qvalue 0.00  
 Charge: 2, Exp. m/z: 570.778, Calc. m/z: 570.782  
 Data File: HeLa\_chytry\_HCD\_2, Scans: 9229 - 9229

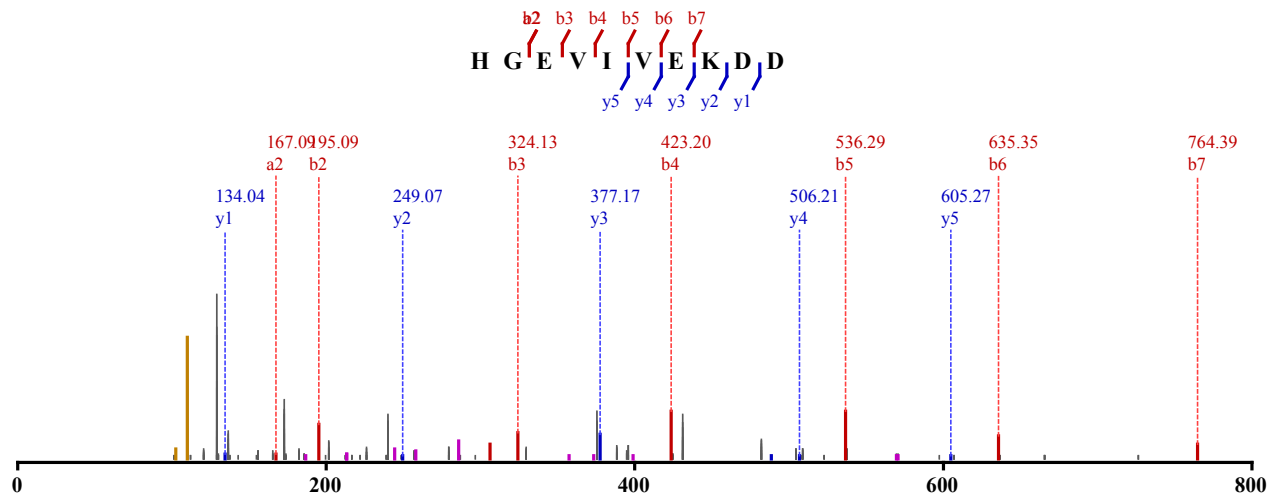

Not Modified

Identified in MSS127 with qvalue 0.00  
 Charge: 2, Exp. m/z: 570.779, Calc. m/z: 570.782  
 Data File: HeLa\_chytry\_HCD\_1, Scans: 6632 - 6632

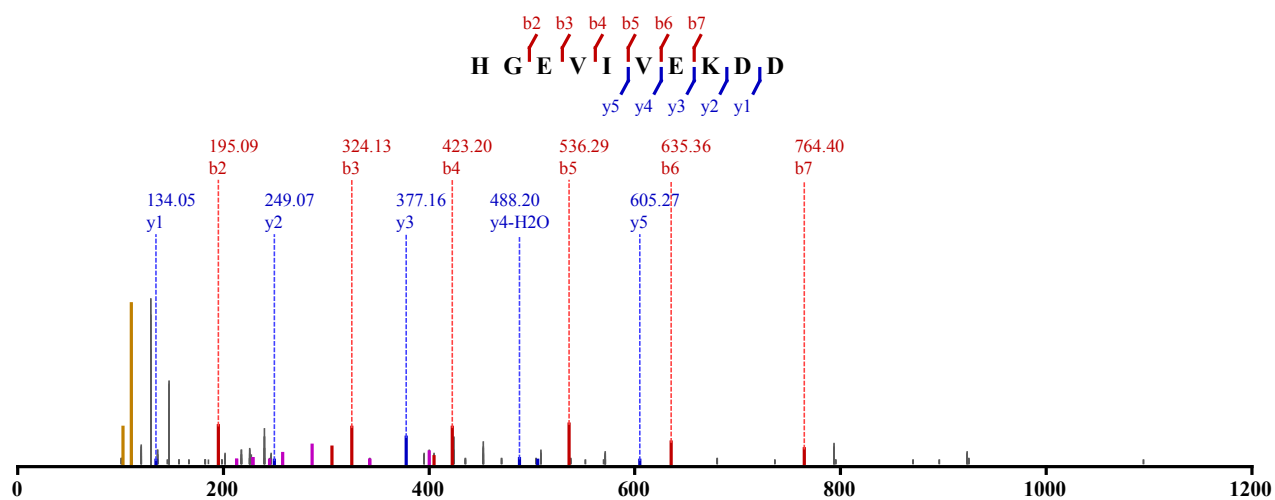

Not Modified  
 Identified in MSS127 with qvalue 0.00  
 Charge: 2, Exp. m/z: 570.780, Calc. m/z: 570.782  
 Data File: HeLa\_chytry\_HCD\_3, Scans: 9089 - 9089

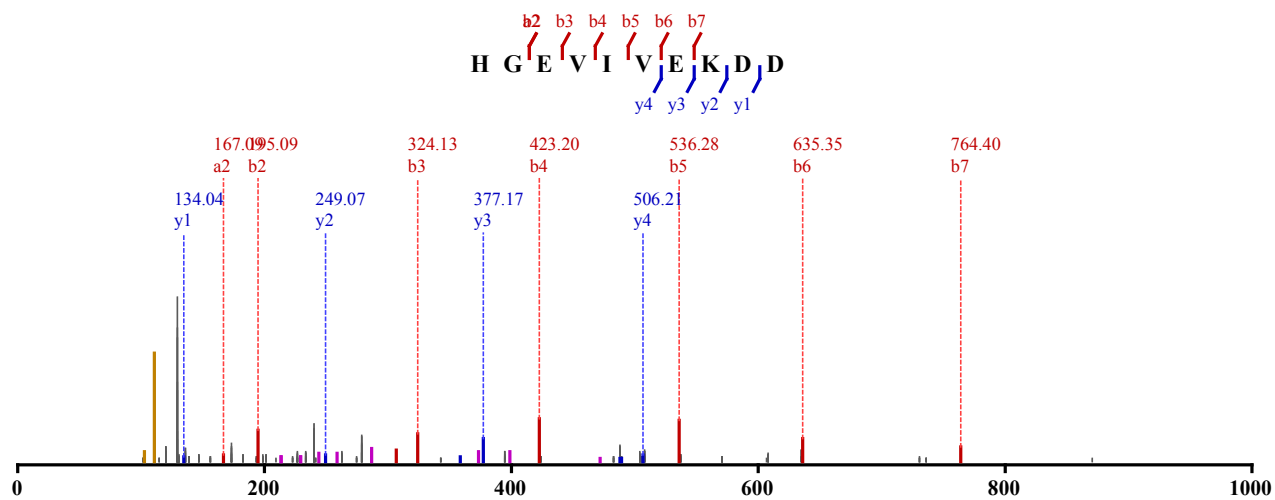

Not Modified  
 Identified in MSS137 with qvalue 0.00  
 Charge: 2, Exp. m/z: 570.779, Calc. m/z: 570.782  
 Data File: HeLa\_GluC-chytry\_HCD\_2, Scans: 10353 - 10353

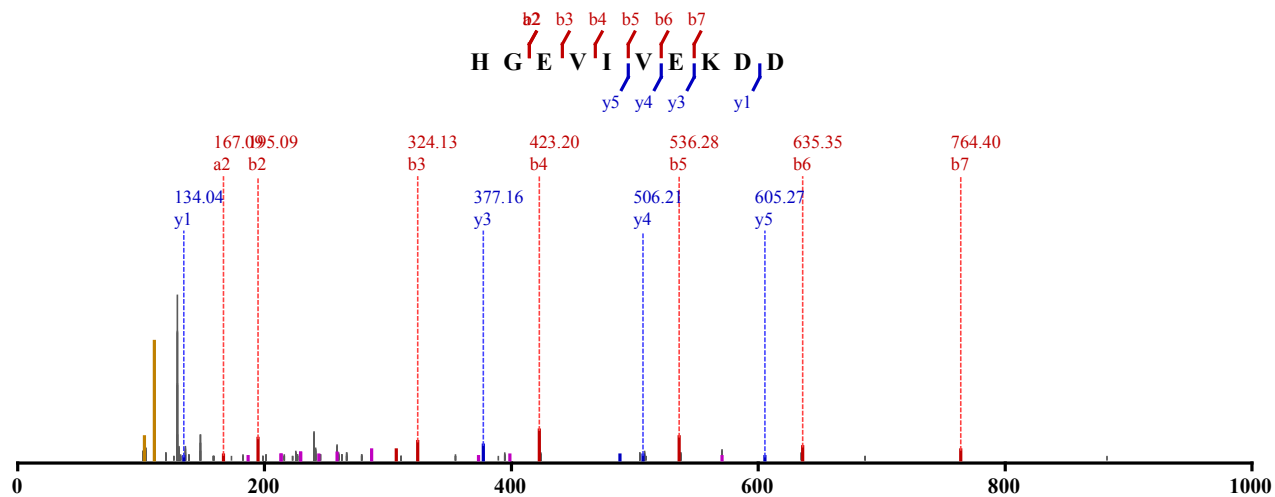

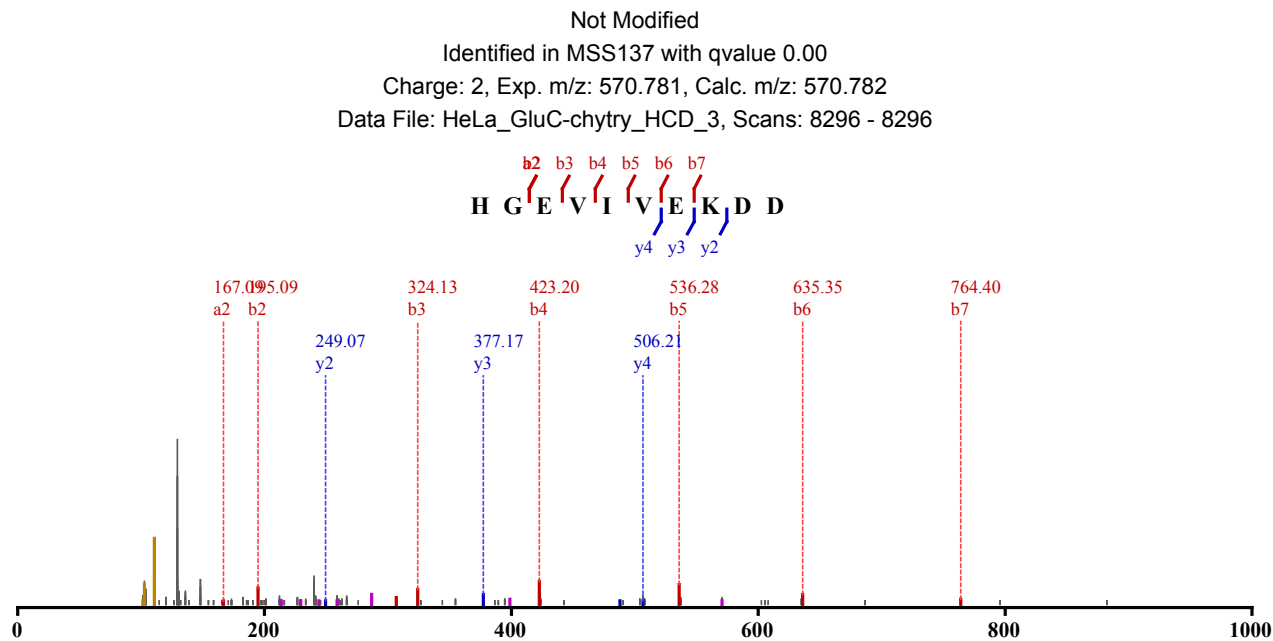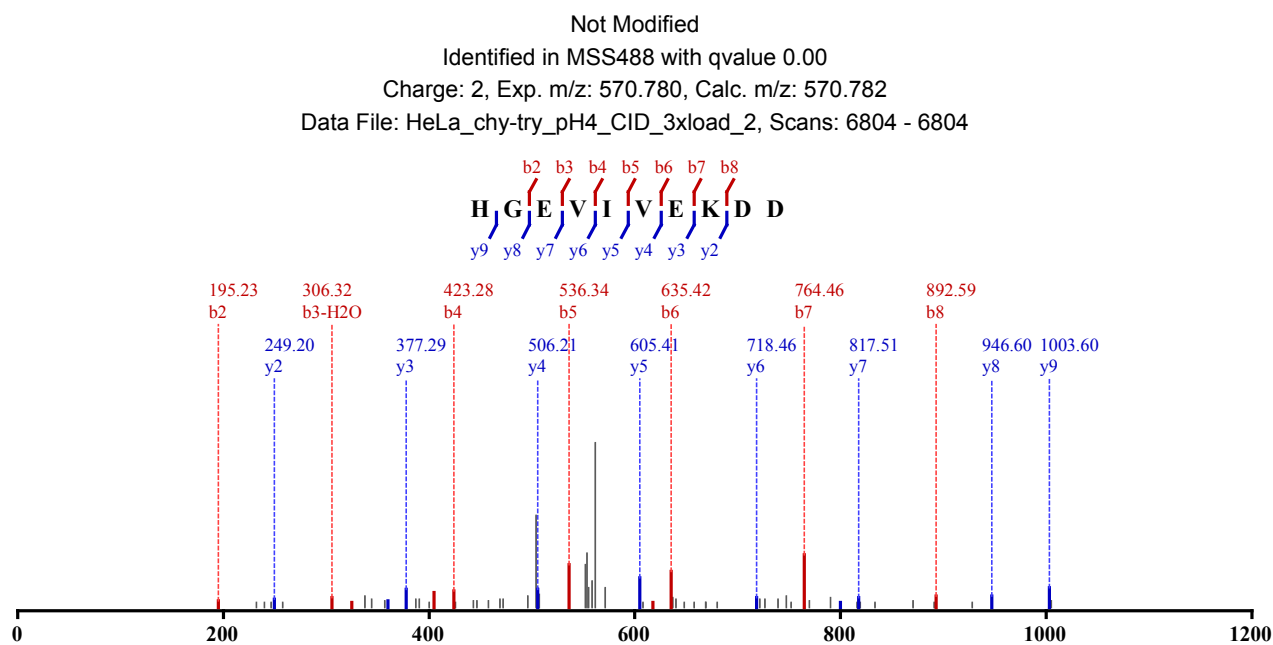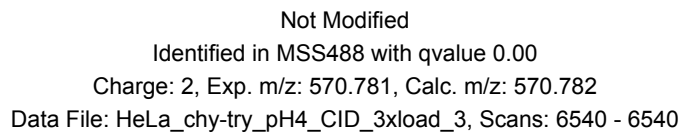

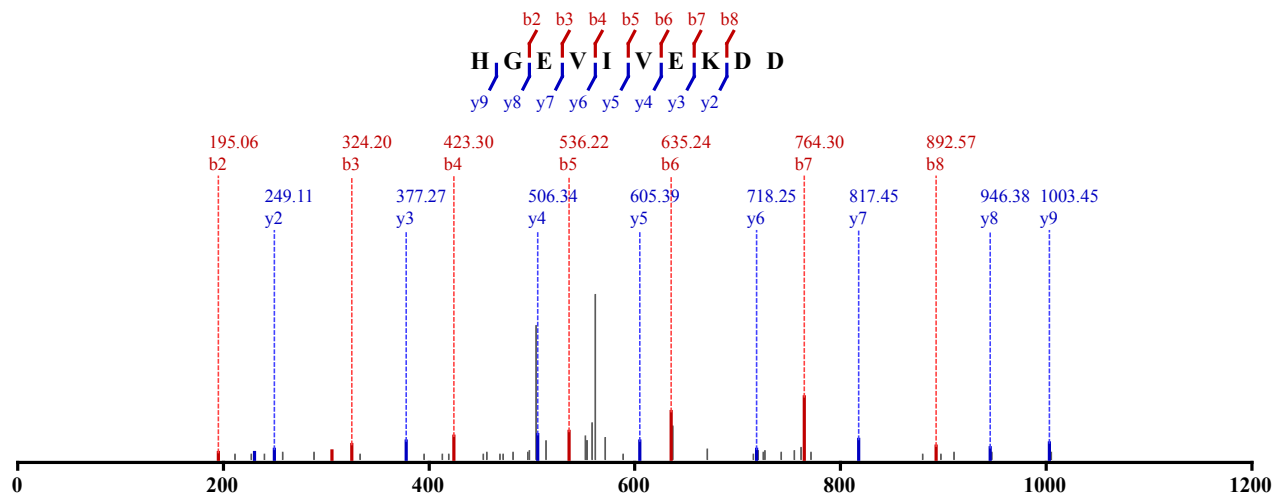

Not Modified

Identified in MSS488 with qvalue 0.00

Charge: 2, Exp. m/z: 570.781, Calc. m/z: 570.782

Data File: HeLa\_chy-try\_pH4\_CID\_3xload\_3, Scans: 6597 - 6597

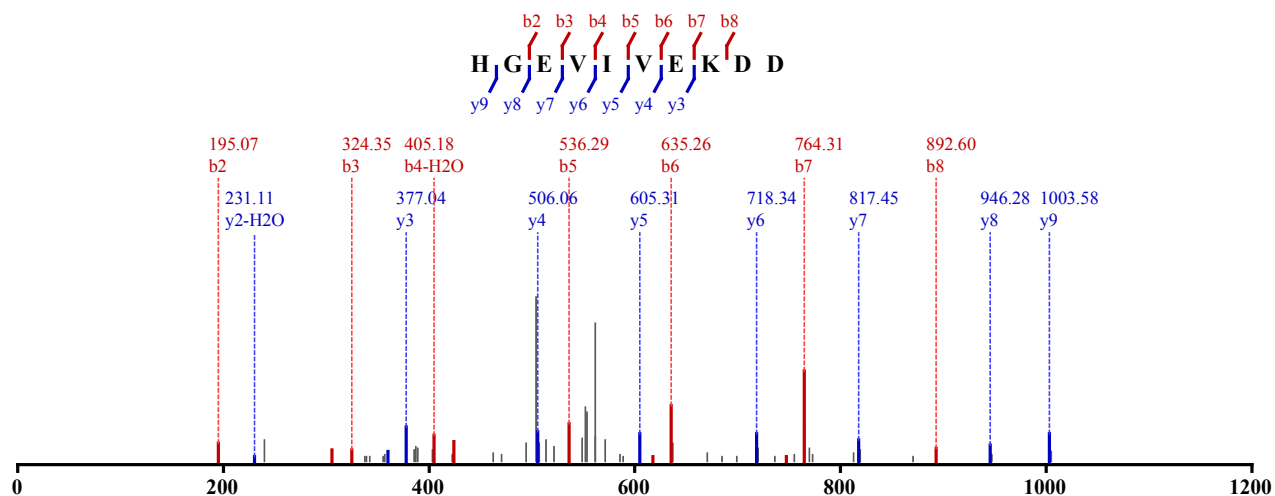

Not Modified

Identified in MSS488 with qvalue 0.00

Charge: 2, Exp. m/z: 570.781, Calc. m/z: 570.782

Data File: HeLa\_chy-try\_pH4\_CID\_3xload, Scans: 7068 - 7068

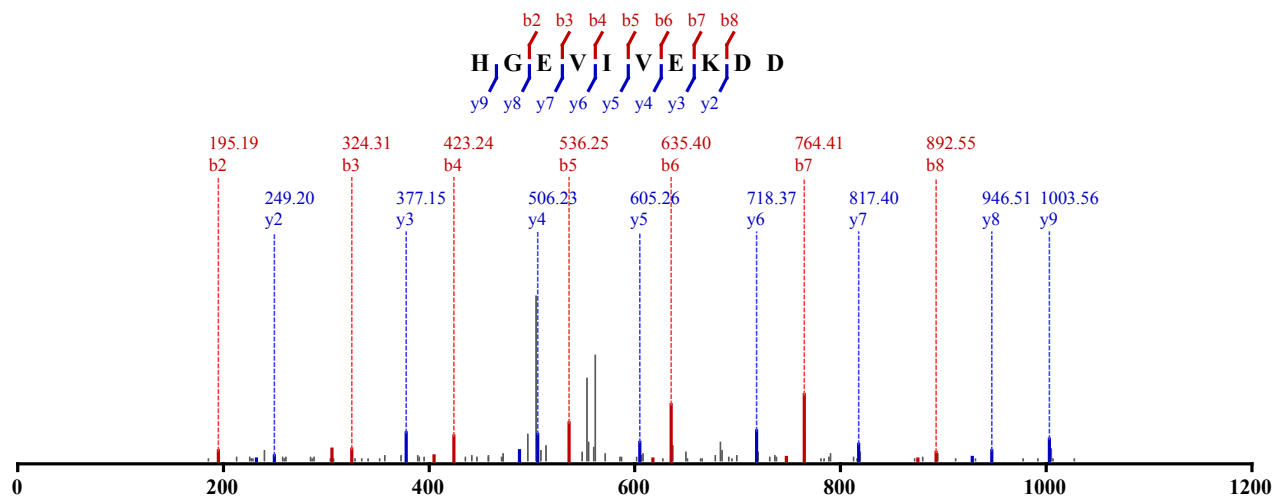

Not Modified

Identified in MSS488 with qvalue 0.00

Charge: 2, Exp. m/z: 570.780, Calc. m/z: 570.782



Data File: HeLa\_chy-try\_pH4\_CID\_3xload, Scans: 7140 - 7140

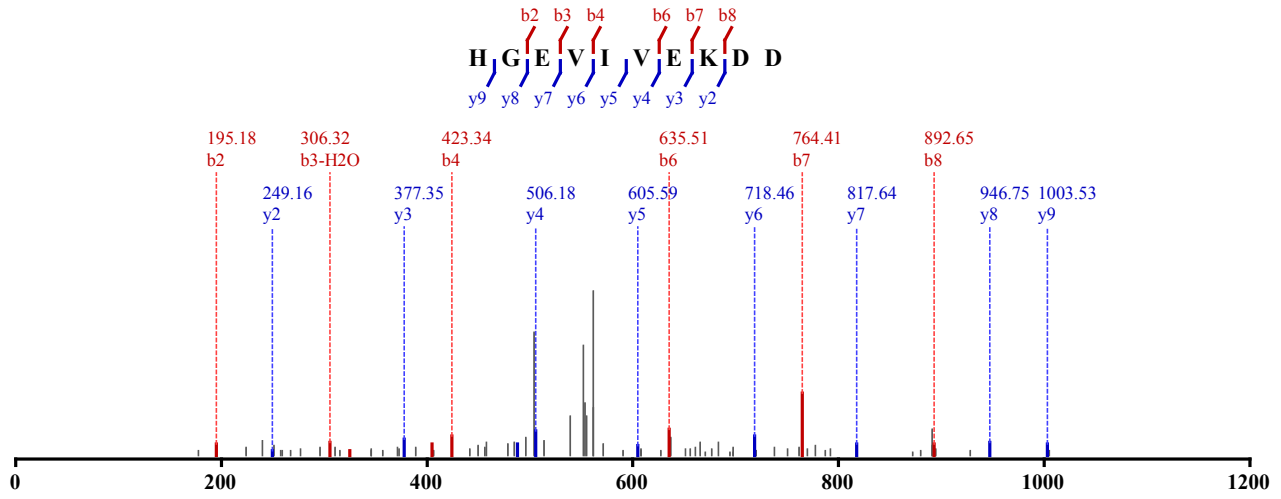

Not Modified

Identified in MSS488 with qvalue 0.00

Charge: 2, Exp. m/z: 570.781, Calc. m/z: 570.782

Data File: HeLa\_chy-try\_pH5\_CID\_3xload\_2, Scans: 7340 - 7340

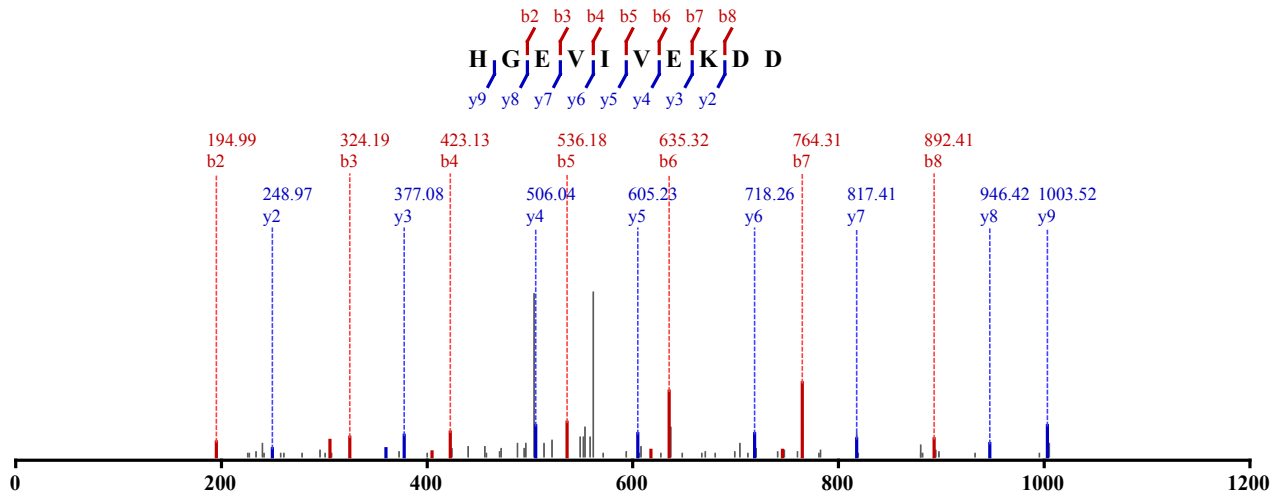

Not Modified

Identified in MSS488 with qvalue 0.00

Charge: 2, Exp. m/z: 570.781, Calc. m/z: 570.782

Data File: HeLa\_chy-try\_pH4\_CID\_3xload\_2, Scans: 6738 - 6738

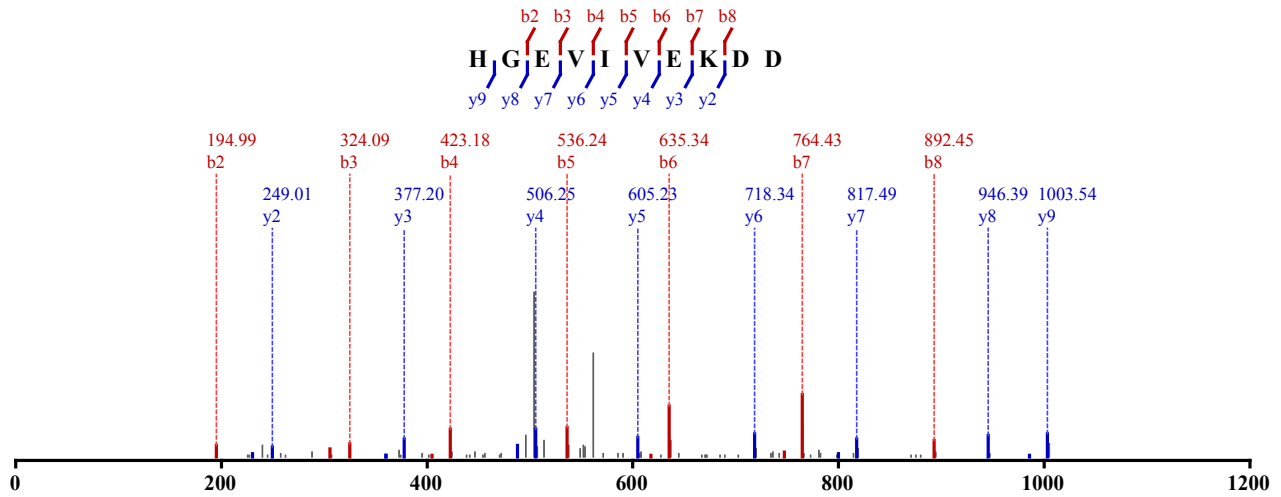

Not Modified

Identified in MSS488 with qvalue 0.00  
 Charge: 2, Exp. m/z: 570.781, Calc. m/z: 570.782  
 Data File: HeLa\_chy-try\_pH5\_CID\_3xload, Scans: 7806 - 7806

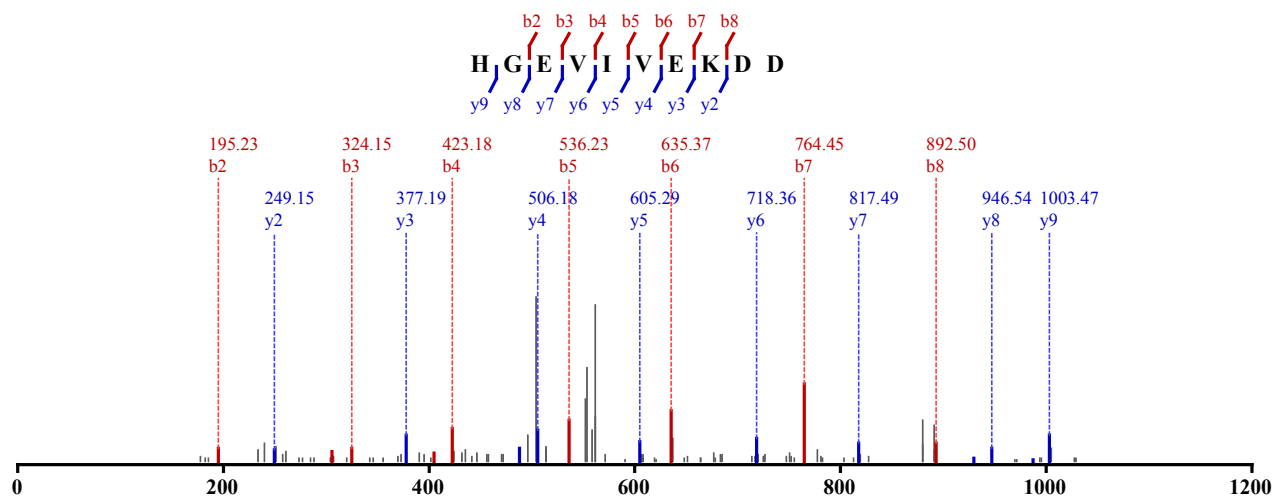

Not Modified  
 Identified in MSS479 with qvalue 0.00  
 Charge: 2, Exp. m/z: 862.974, Calc. m/z: 862.977  
 Data File: HeLa\_AspN\_pH5\_HCD\_3, Scans: 44188 - 44188

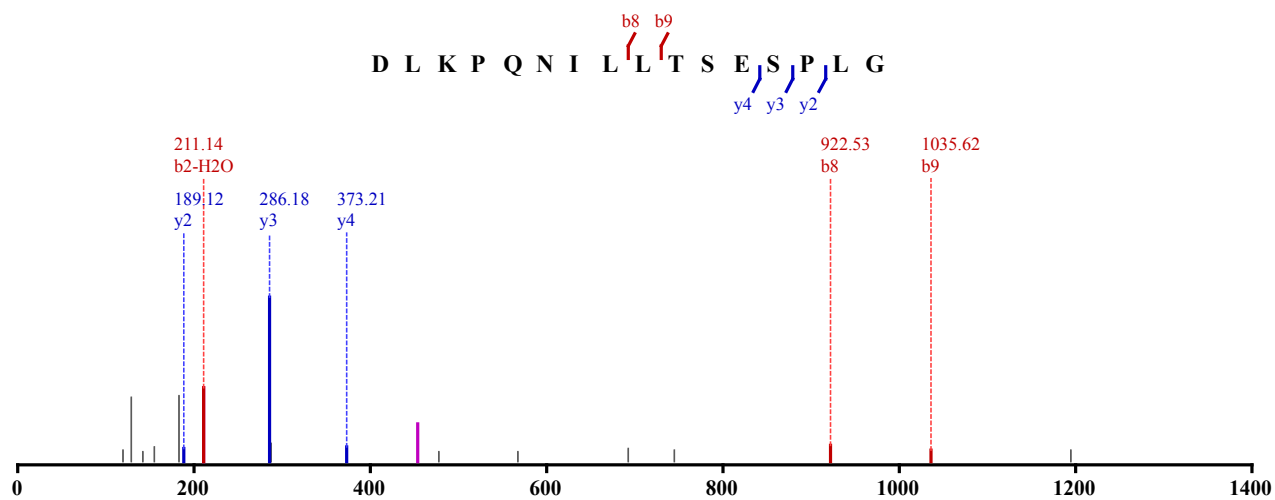

Not Modified  
 Identified in MSS479 with qvalue 0.00  
 Charge: 2, Exp. m/z: 862.975, Calc. m/z: 862.977  
 Data File: HeLa\_AspN\_pH5\_HCD\_2, Scans: 44658 - 44658

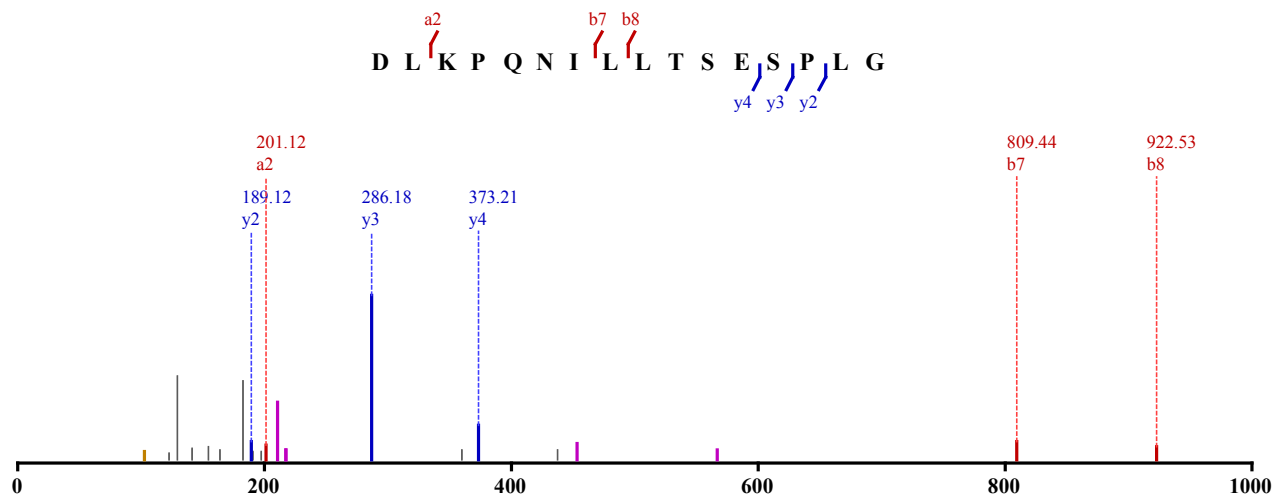

Not Modified

Identified in MSS479 with qvalue 0.00

Charge: 2, Exp. m/z: 862.975, Calc. m/z: 862.977

Data File: HeLa\_AspN\_pH6\_HCD\_2, Scans: 48374 - 48374

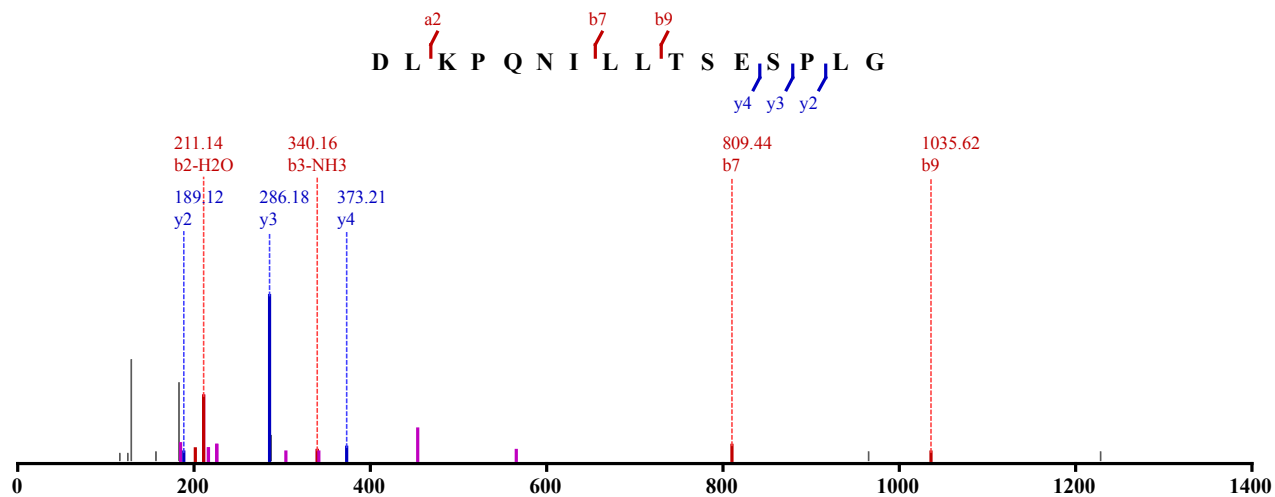

Not Modified

Identified in MSS483 with qvalue 0.00

Charge: 2, Exp. m/z: 862.977, Calc. m/z: 862.977

Data File: HeLa\_AspN\_pH4\_CID\_3xload\_2, Scans: 28645 - 28645

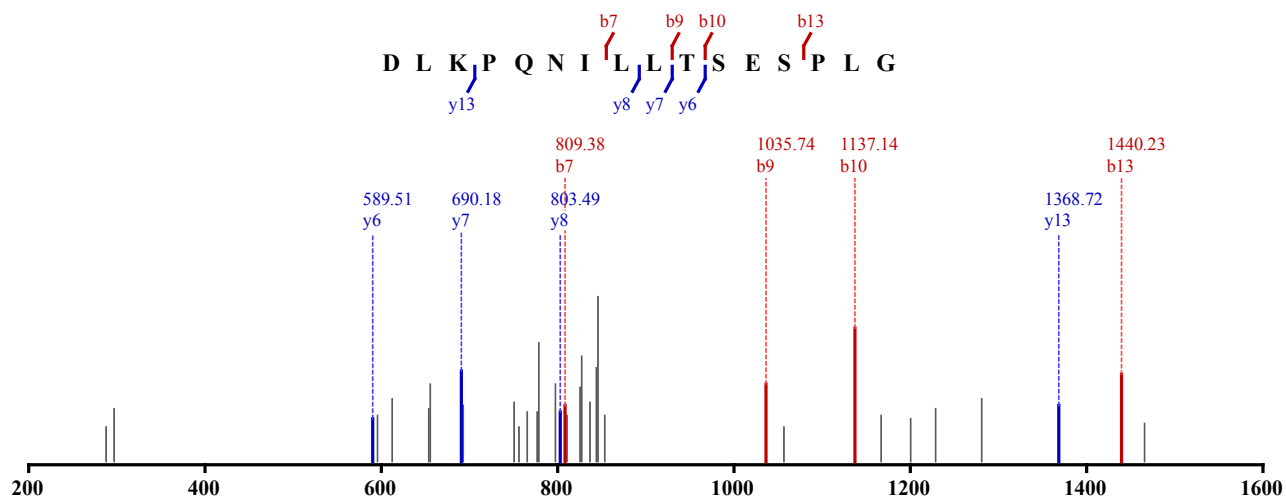

Not Modified

Identified in MSS483 with qvalue 0.00

Charge: 2, Exp. m/z: 862.976, Calc. m/z: 862.977

Data File: HeLa\_AspN\_pH5\_CID\_3xload, Scans: 29213 - 29213

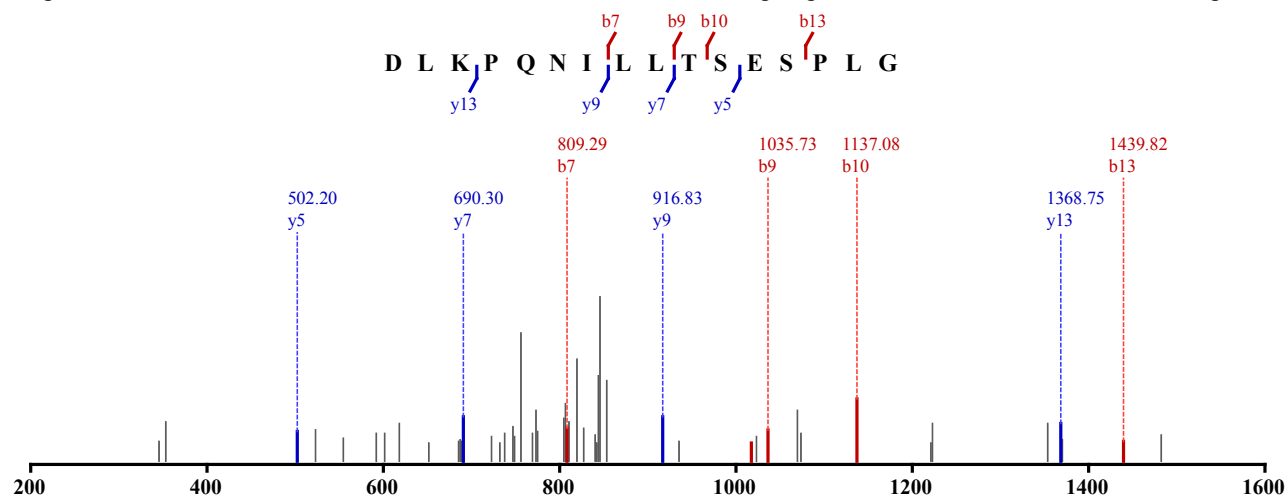

Not Modified  
 Identified in MSS483 with qvalue 0.00  
 Charge: 2, Exp. m/z: 862.975, Calc. m/z: 862.977  
 Data File: HeLa\_AspN\_pH5\_CID\_3xload\_2, Scans: 28766 - 28766

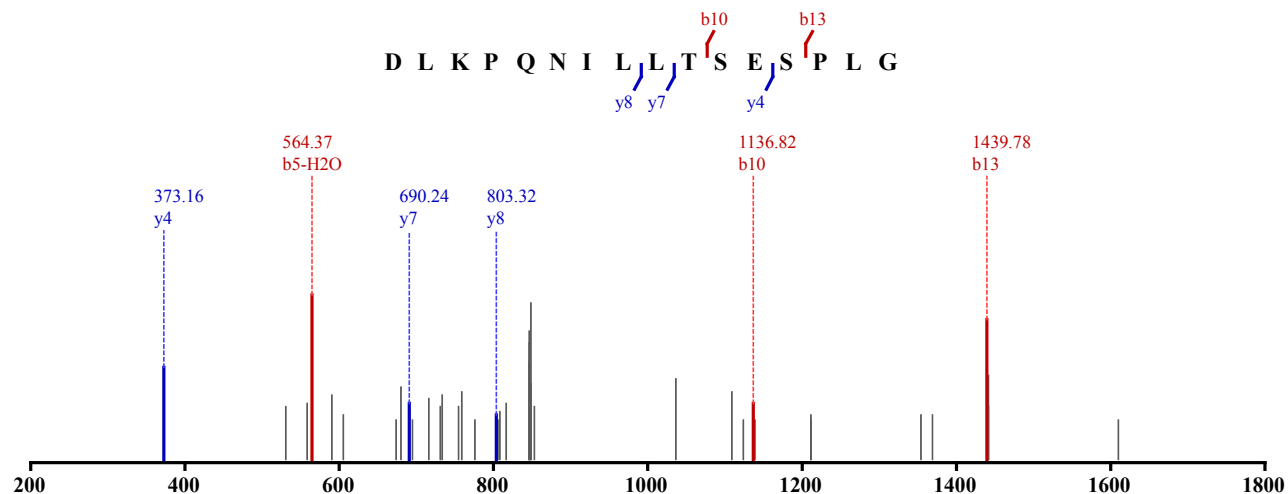

Not Modified  
 Identified in MSS483 with qvalue 0.00  
 Charge: 2, Exp. m/z: 862.974, Calc. m/z: 862.977  
 Data File: HeLa\_AspN\_pH5\_CID\_3xload\_2, Scans: 28656 - 28656

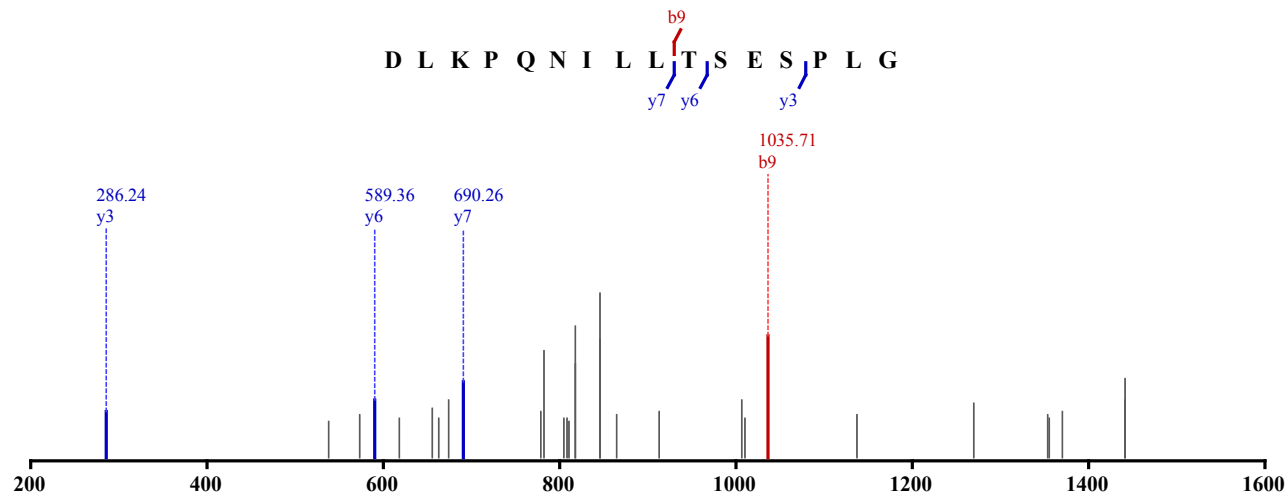

Not Modified  
 Identified in MSS483 with qvalue 0.00  
 Charge: 2, Exp. m/z: 862.975, Calc. m/z: 862.977

Data File: HeLa\_AspN\_pH4\_CID\_3xload\_2, Scans: 28593 - 28593

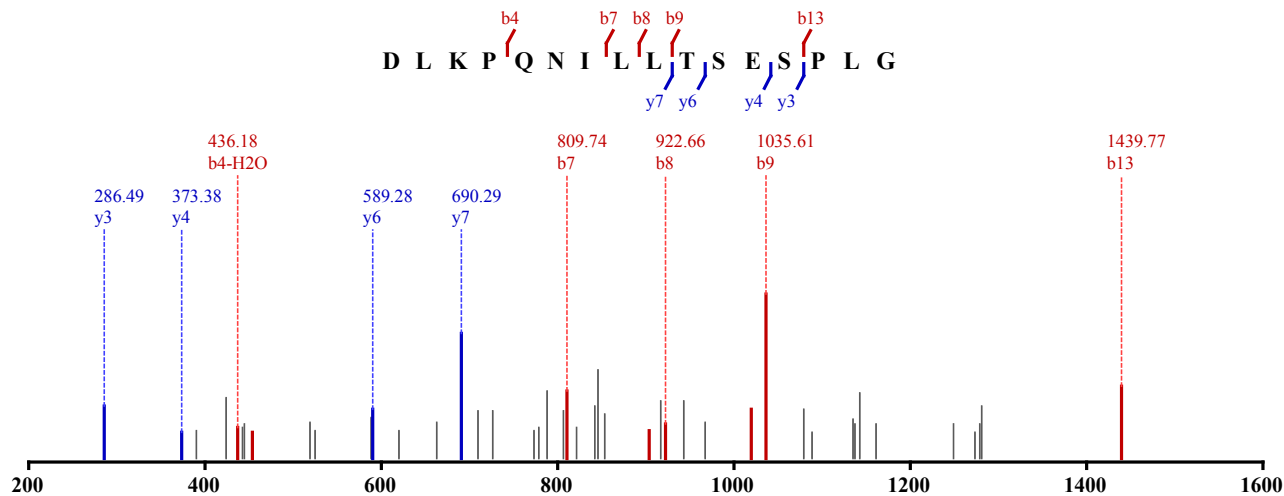

Not Modified

Identified in MSS483 with qvalue 0.00

Charge: 2, Exp. m/z: 862.976, Calc. m/z: 862.977

Data File: HeLa\_AspN\_pH5\_CID\_3xload\_2, Scans: 28700 - 28700

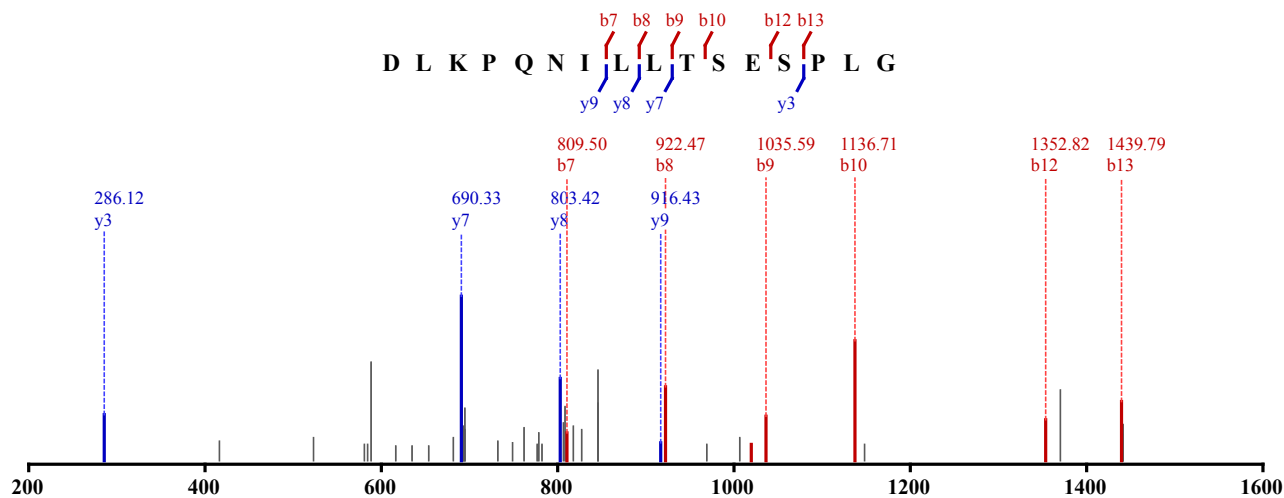

Not Modified

Identified in MSS483 with qvalue 0.00

Charge: 2, Exp. m/z: 863.478, Calc. m/z: 862.977

Data File: HeLa\_AspN\_pH5\_CID\_3xload\_2, Scans: 28778 - 28778

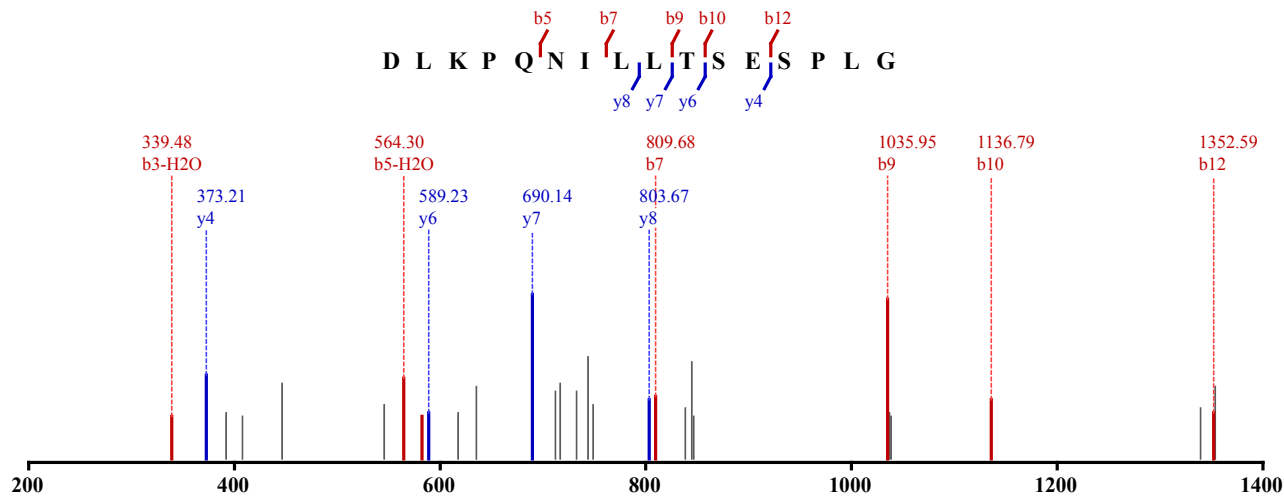

Not Modified

Identified in MSS483 with qvalue 0.00  
 Charge: 2, Exp. m/z: 862.977, Calc. m/z: 862.977  
 Data File: HeLa\_AspN\_pH5\_CID\_3xload, Scans: 29113 - 29113

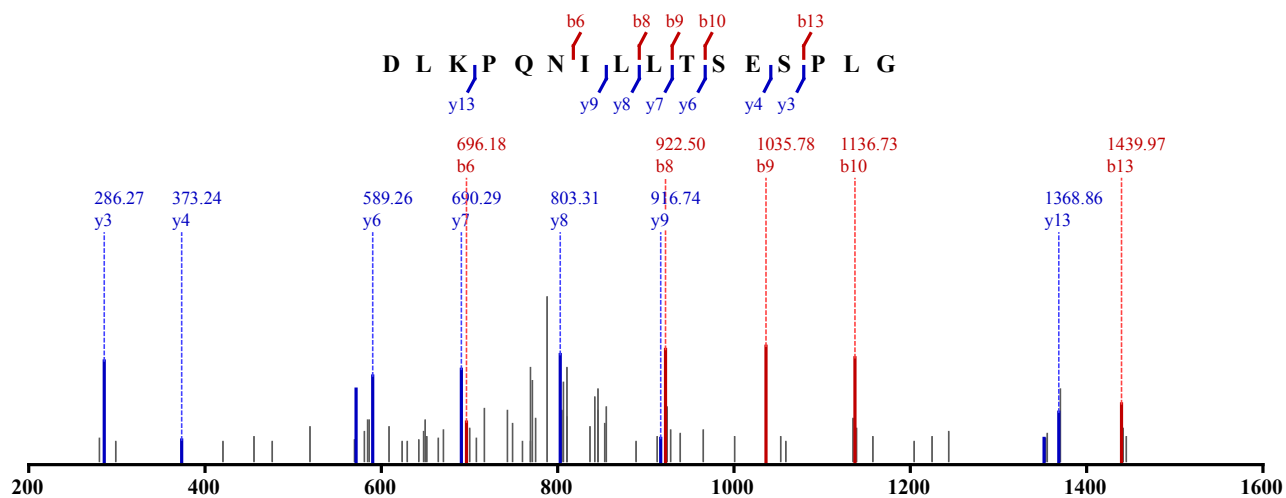

Not Modified  
 Identified in MSS483 with qvalue 0.00  
 Charge: 2, Exp. m/z: 862.976, Calc. m/z: 862.977  
 Data File: HeLa\_AspN\_pH6\_CID\_3xload, Scans: 32759 - 32759

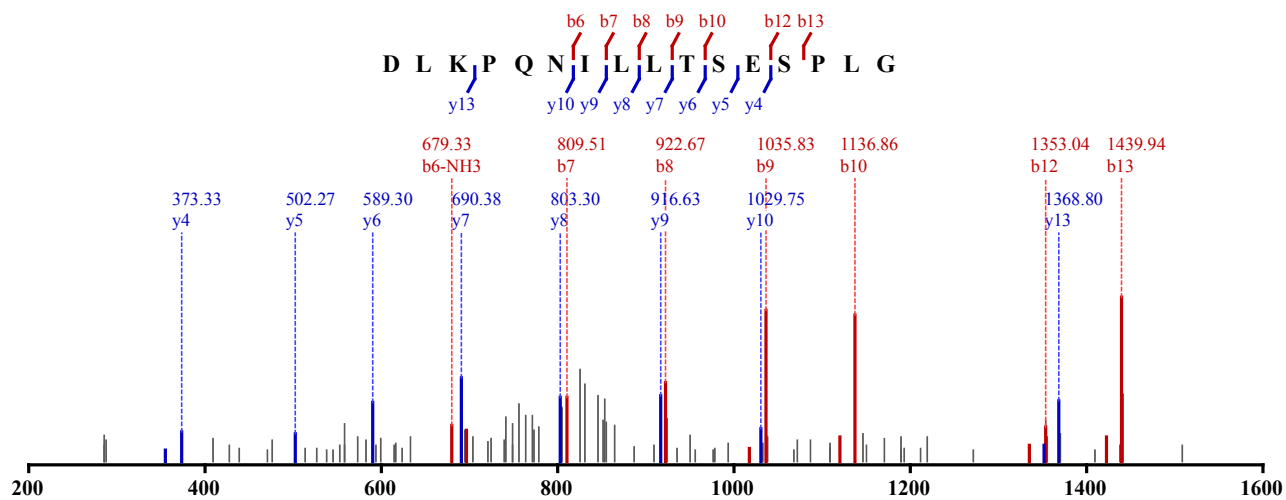

Not Modified  
 Identified in MSS483 with qvalue 0.00  
 Charge: 2, Exp. m/z: 862.976, Calc. m/z: 862.977  
 Data File: HeLa\_AspN\_pH8\_CID\_3xload\_2, Scans: 37757 - 37757

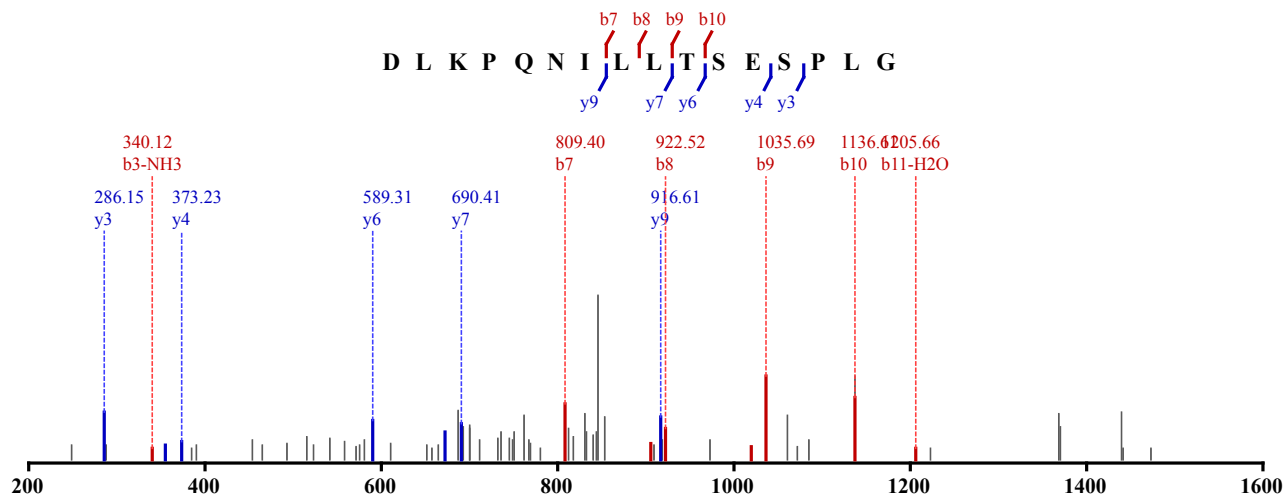

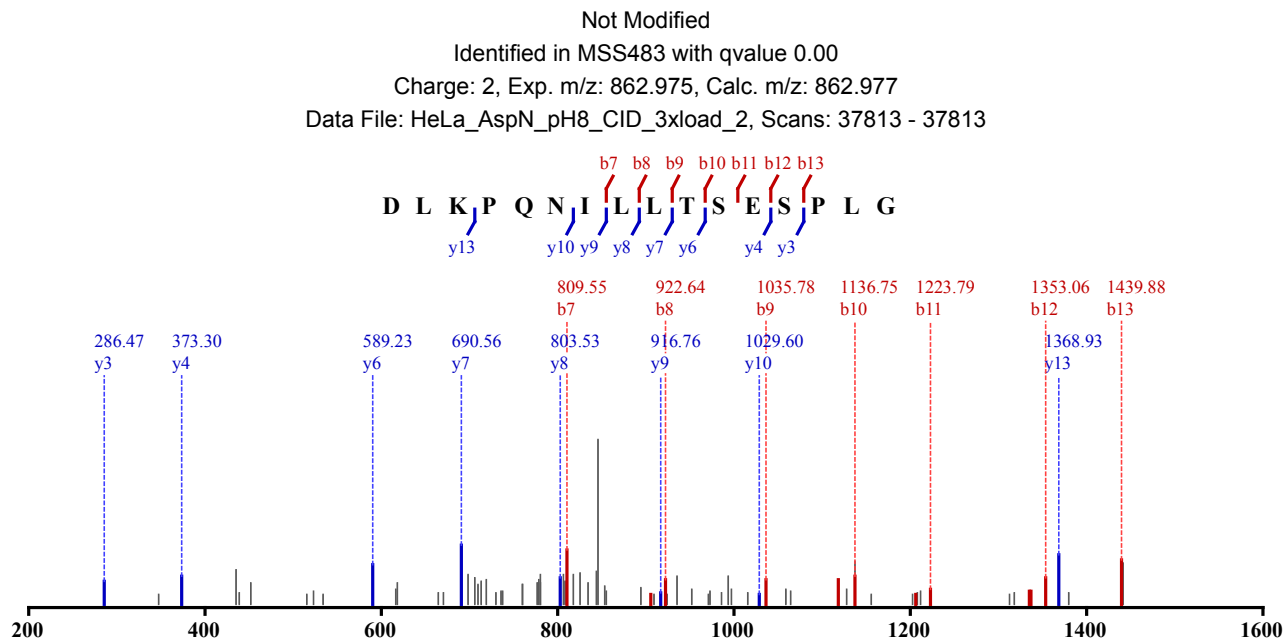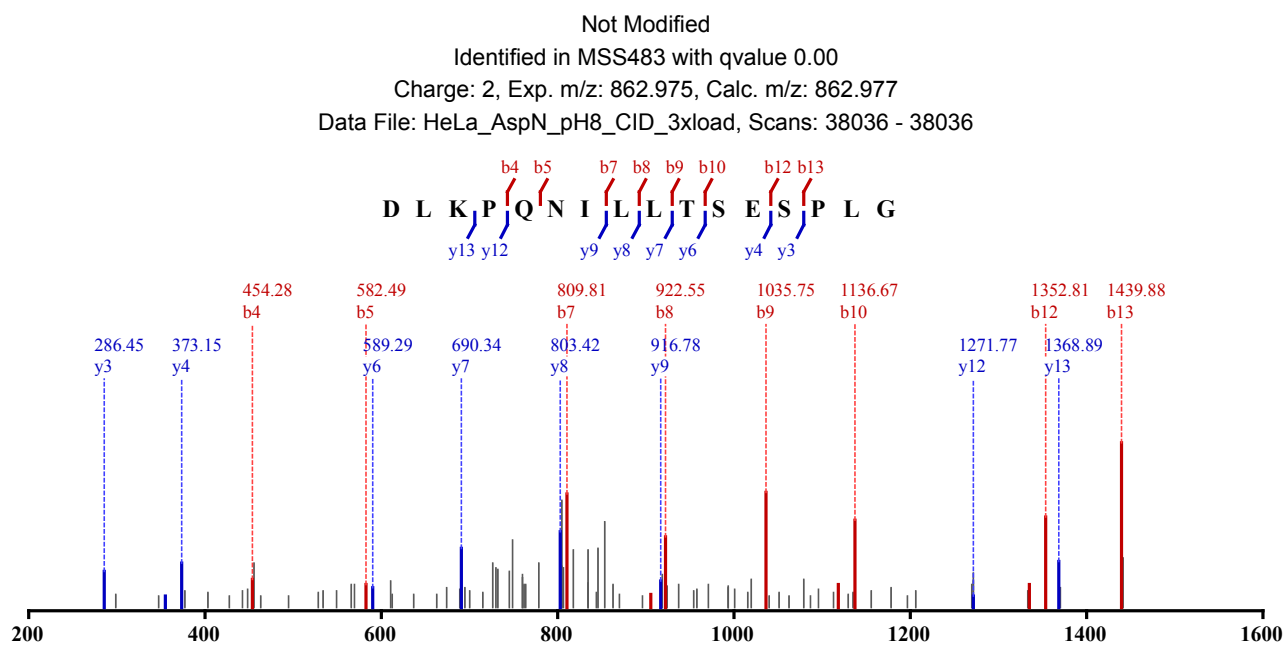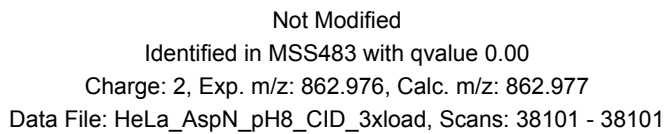

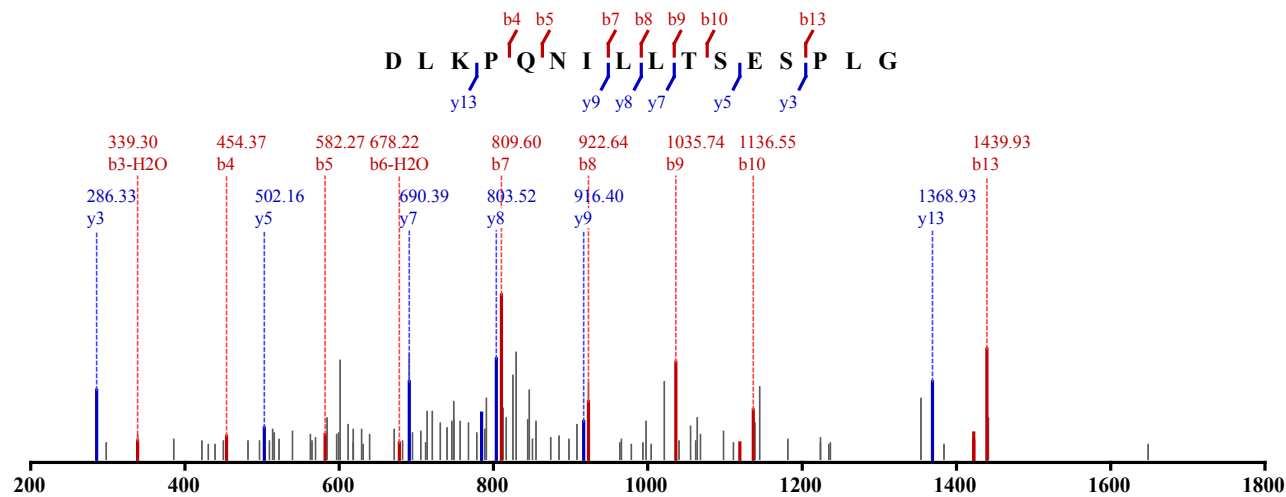

Not Modified  
 Identified in MSS483 with qvalue 0.00  
 Charge: 2, Exp. m/z: 862.975, Calc. m/z: 862.977  
 Data File: HeLa\_AspN\_pH4\_CID\_3xload, Scans: 29102 - 29102

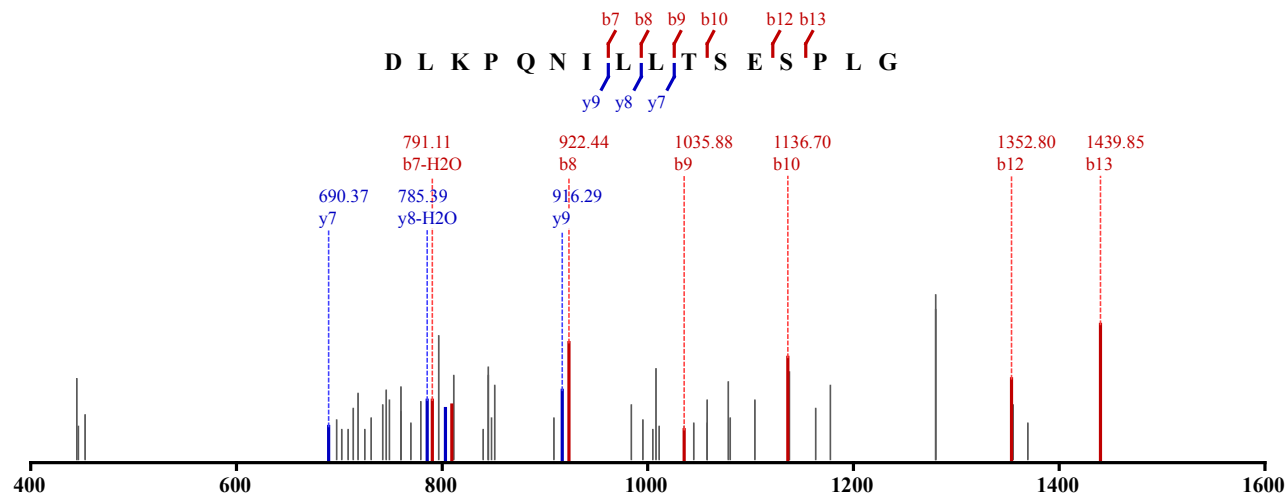

Not Modified  
 Identified in MSS483 with qvalue 0.00  
 Charge: 2, Exp. m/z: 862.477, Calc. m/z: 862.977  
 Data File: HeLa\_AspN\_pH5\_CID\_3xload, Scans: 29169 - 29169

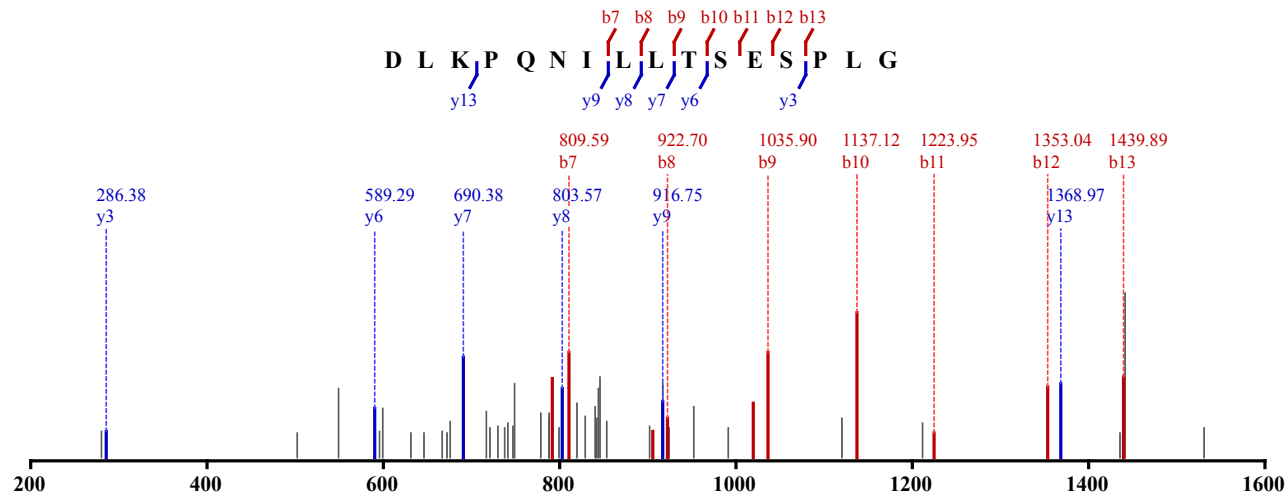

Not Modified  
 Identified in MSS483 with qvalue 0.00  
 Charge: 2, Exp. m/z: 862.478, Calc. m/z: 862.977



Data File: HeLa\_AspN\_pH5\_CID\_3xload, Scans: 29226 - 29226

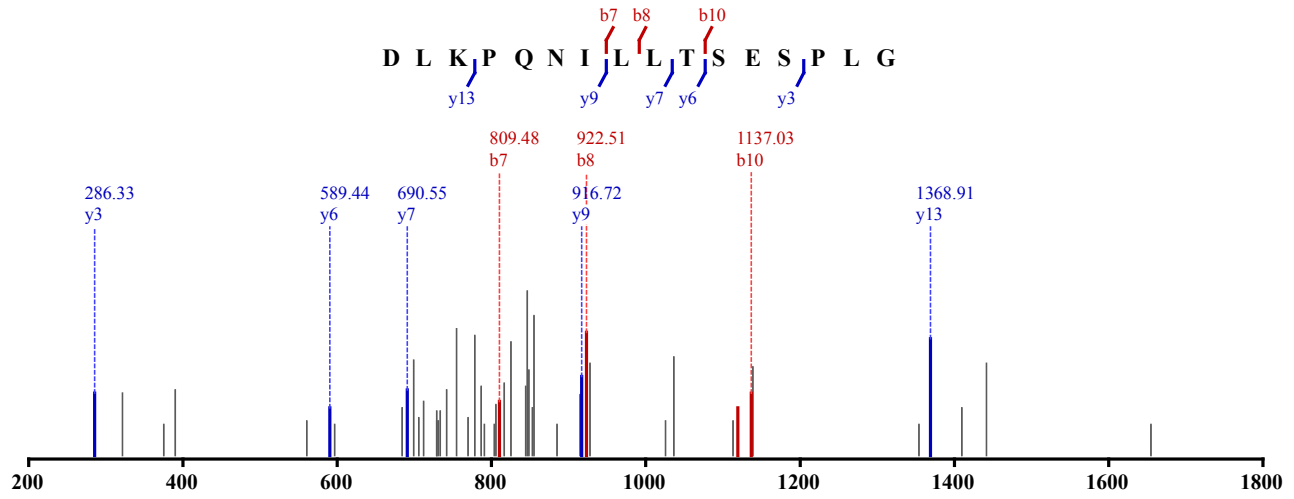

Not Modified

Identified in MSS483 with qvalue 0.00

Charge: 2, Exp. m/z: 862.479, Calc. m/z: 862.977

Data File: HeLa\_AspN\_pH6\_CID\_3xload\_2, Scans: 32183 - 32183

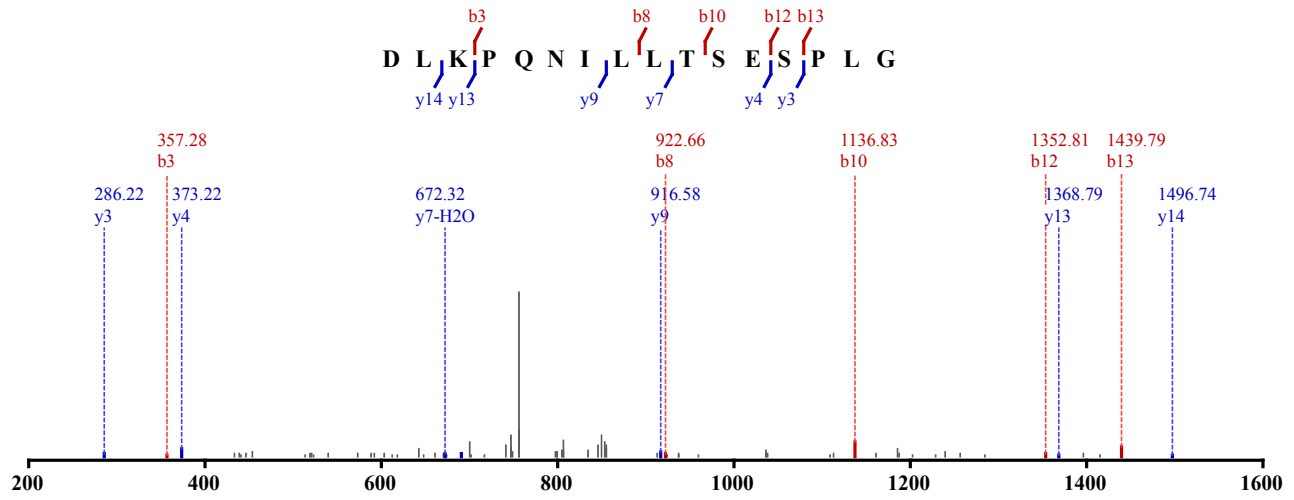

Not Modified

Identified in MSS483 with qvalue 0.00

Charge: 2, Exp. m/z: 862.479, Calc. m/z: 862.977

Data File: HeLa\_AspN\_pH6\_CID\_3xload\_2, Scans: 32239 - 32239

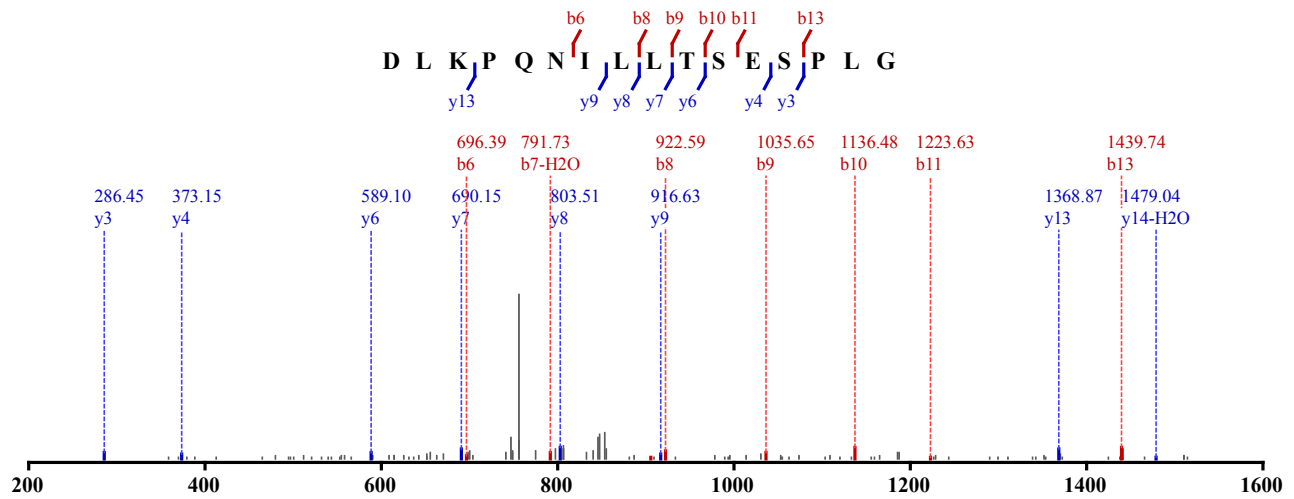

Not Modified

Identified in MSS483 with qvalue 0.00  
 Charge: 2, Exp. m/z: 862.479, Calc. m/z: 862.977  
 Data File: HeLa\_AspN\_pH6\_CID\_3xload\_2, Scans: 32305 - 32305

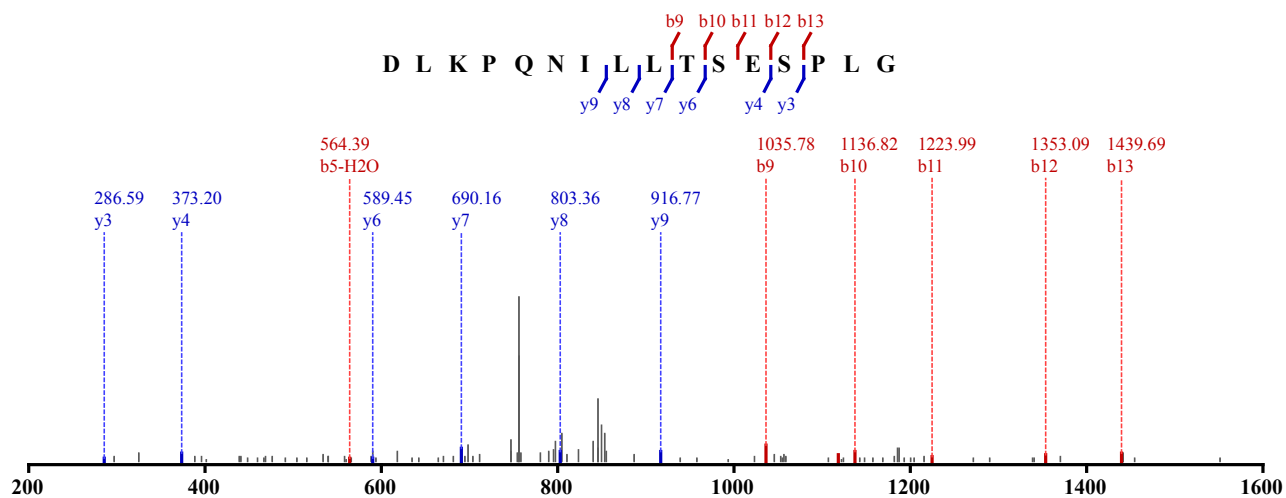

Not Modified  
 Identified in MSS482 with qvalue 0.00  
 Charge: 2, Exp. m/z: 580.314, Calc. m/z: 579.812  
 Data File: HeLa\_GluC\_80pcACN\_CID\_3xload\_3, Scans: 43836 - 43836

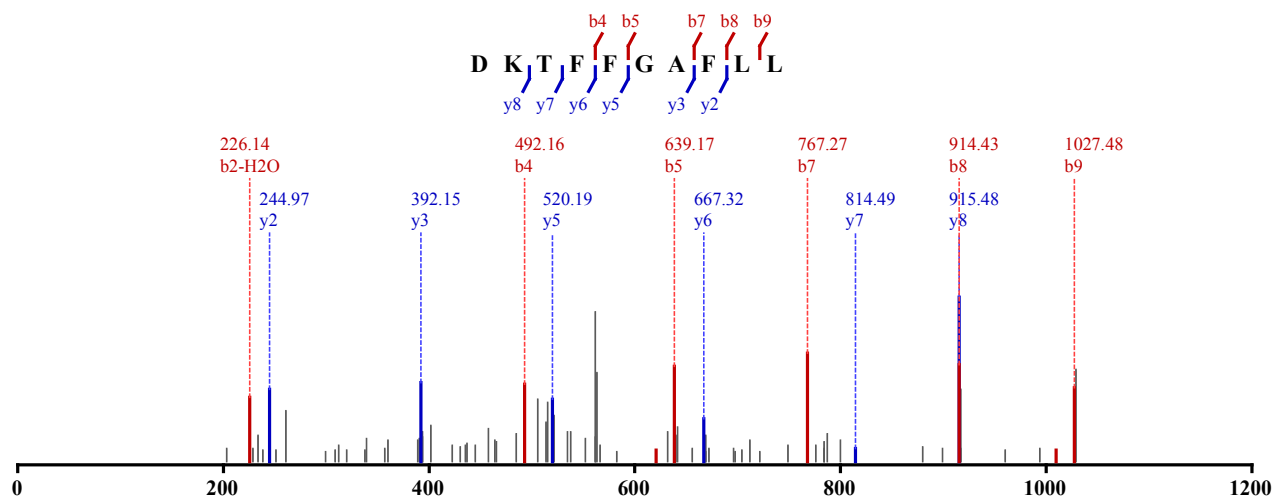

Not Modified  
 Identified in MSS479 with qvalue 0.00  
 Charge: 3, Exp. m/z: 551.278, Calc. m/z: 551.277  
 Data File: HeLa\_AspN\_pH2\_HCD\_1, Scans: 39144 - 39144

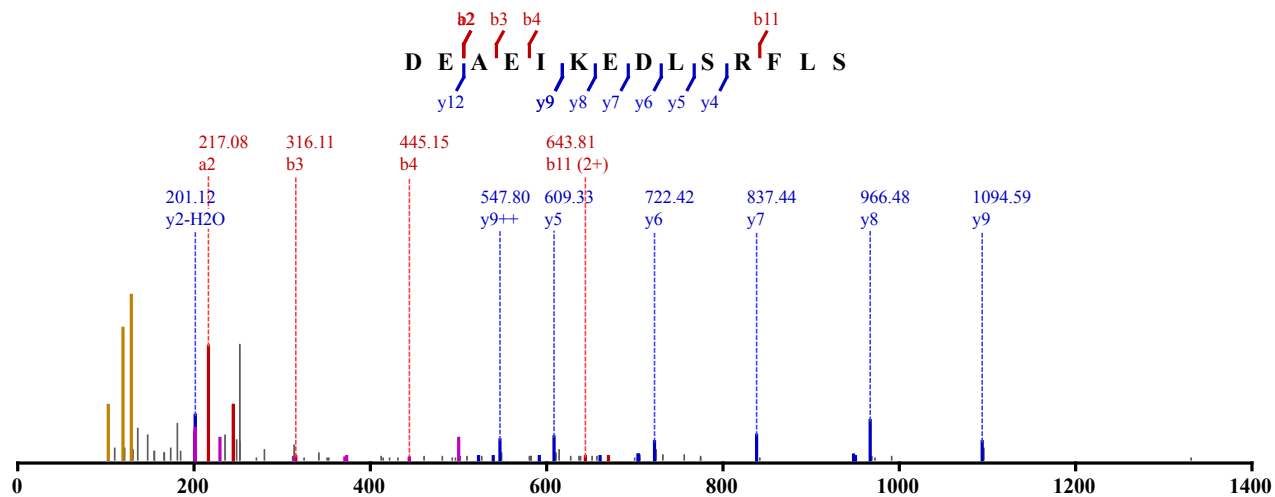

Not Modified

Identified in MSS479 with qvalue 0.00

Charge: 3, Exp. m/z: 551.278, Calc. m/z: 551.277

Data File: HeLa\_AspN\_pH2\_HCD\_2, Scans: 39036 - 39036

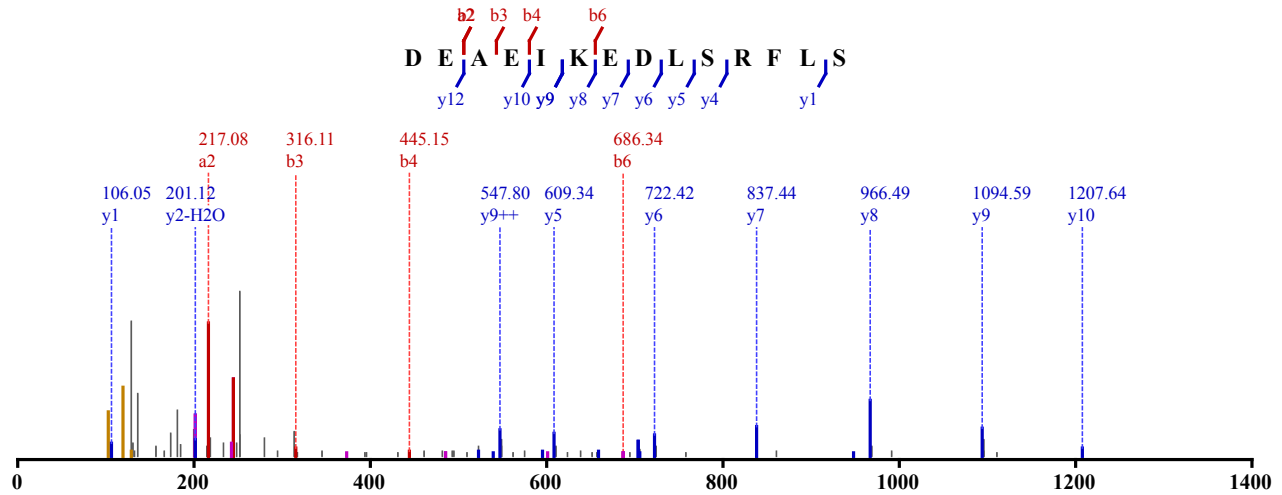

1 x Oxidation (M)

Identified in MSS480 with qvalue 0.00

Charge: 2, Exp. m/z: 598.366, Calc. m/z: 598.362

Data File: HeLa\_try\_pH6\_CID\_3xload\_3, Scans: 46654 - 46654

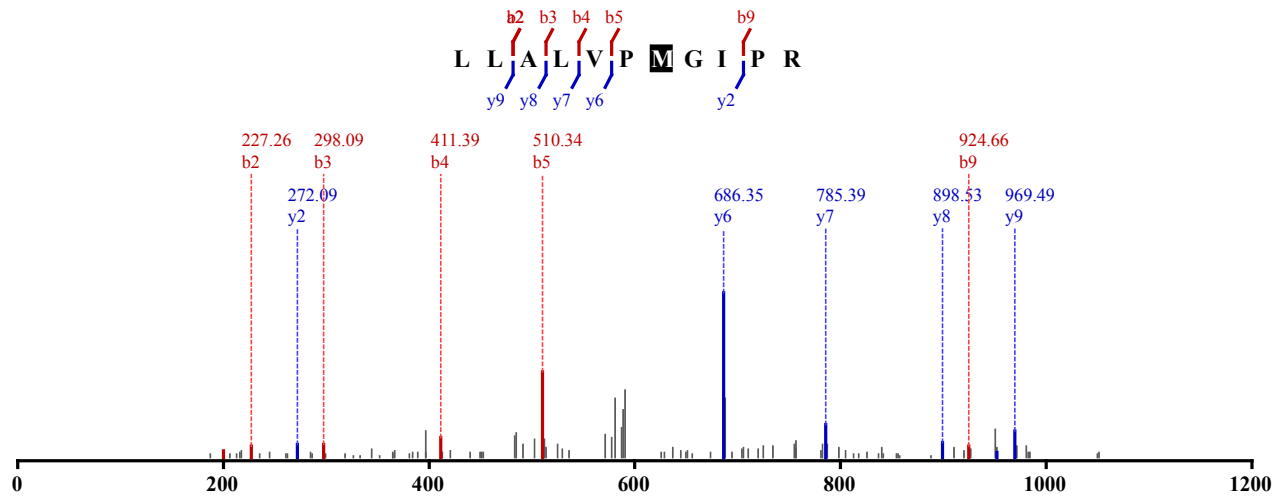

Not Modified

Identified in MSS481 with qvalue 0.00

Charge: 2, Exp. m/z: 784.426, Calc. m/z: 784.422

Data File: HeLa\_LysC\_pH3\_CID\_3xload\_3, Scans: 48953 - 48953

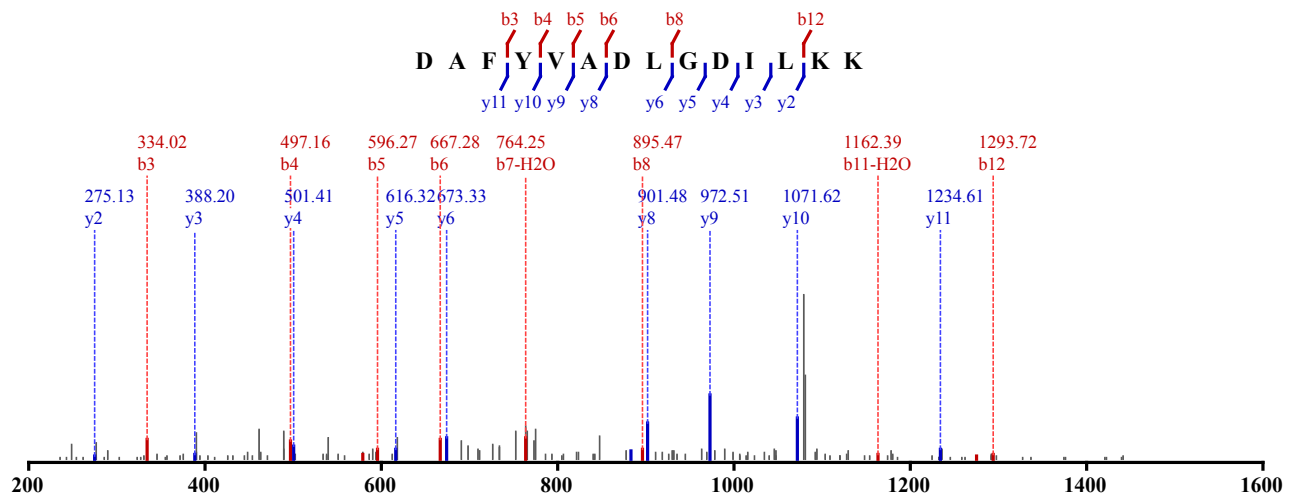

Not Modified

Identified in MSS485 with qvalue 0.00

Charge: 3, Exp. m/z: 523.284, Calc. m/z: 523.284

Data File: HeLa\_LysC\_pH3\_HCD\_2, Scans: 52312 - 52312

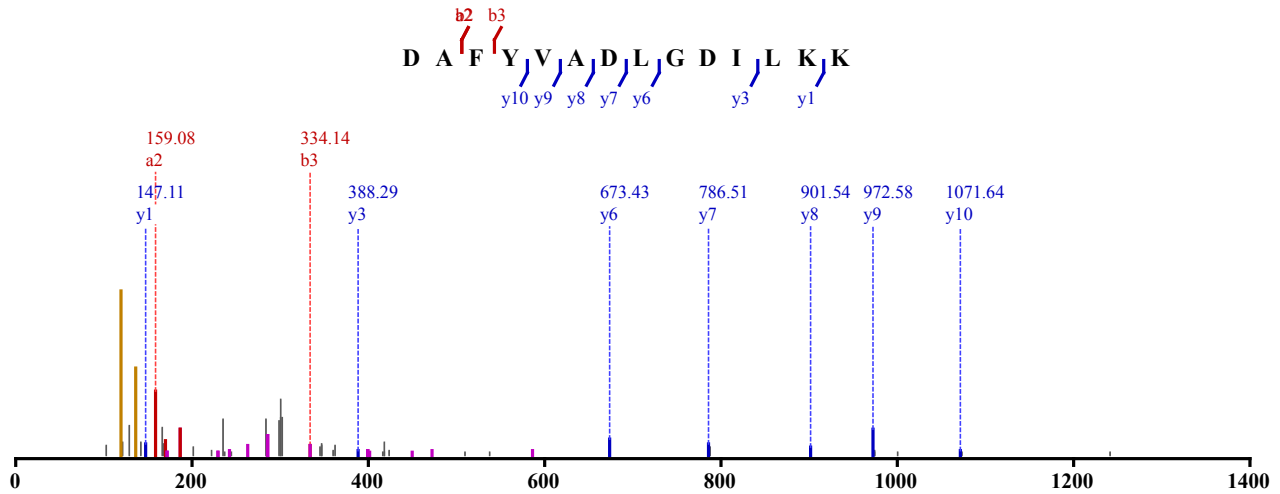

Not Modified

Identified in MSS485 with qvalue 0.00

Charge: 2, Exp. m/z: 759.893, Calc. m/z: 759.892

Data File: HeLa\_LysC\_pH11\_HCD\_1, Scans: 48401 - 48401

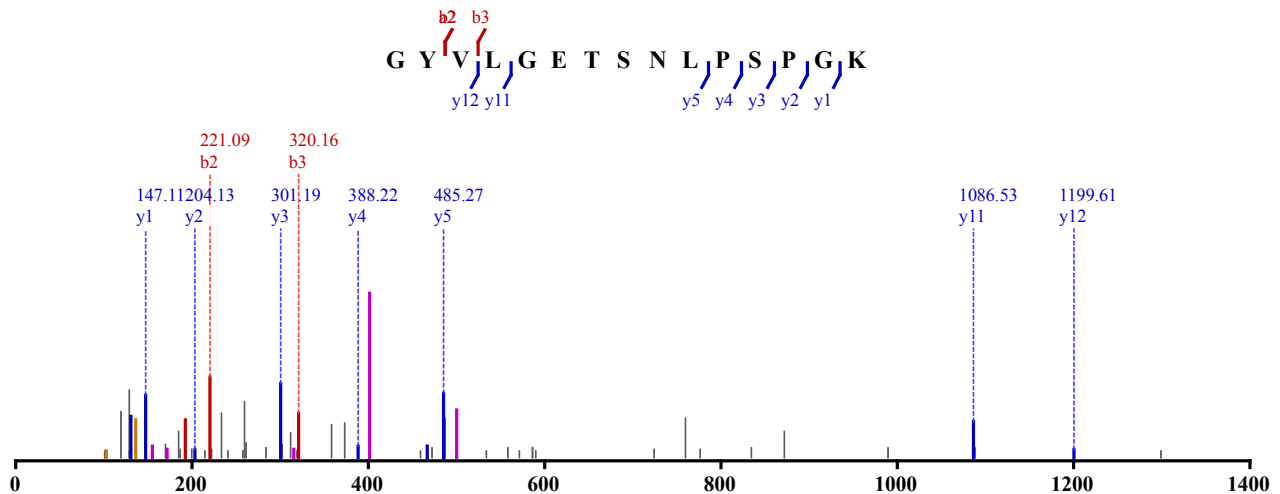

Not Modified

Identified in MSS485 with qvalue 0.00

Charge: 2, Exp. m/z: 759.893, Calc. m/z: 759.892

Data File: HeLa\_LysC\_pH11\_HCD\_3, Scans: 41613 - 41613

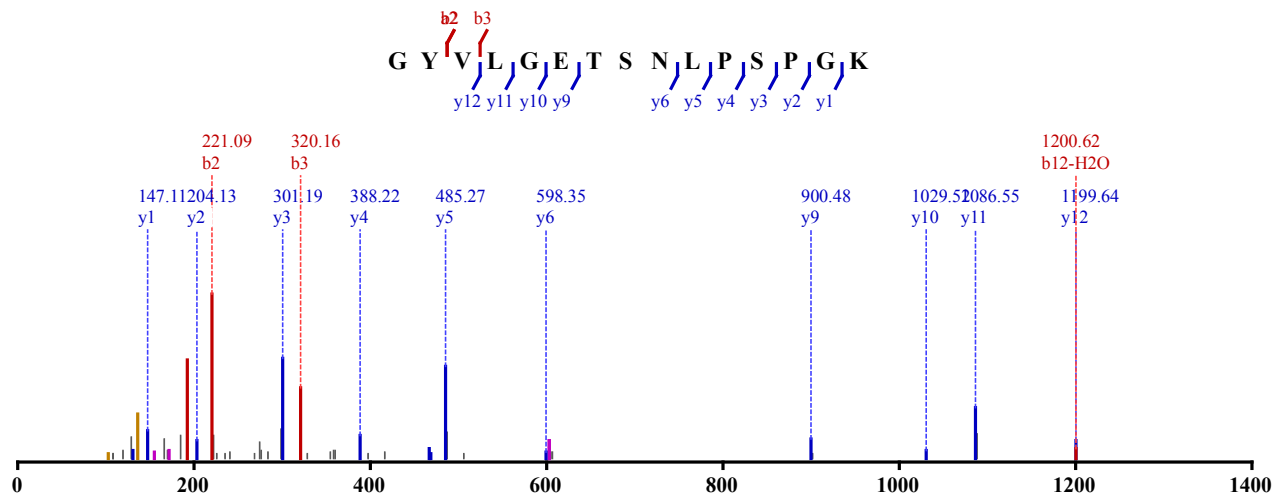

Not Modified

Identified in MSS485 with qvalue 0.00

Charge: 2, Exp. m/z: 759.895, Calc. m/z: 759.892

Data File: HeLa\_LysC\_pH8\_HCD\_3, Scans: 38922 - 38922

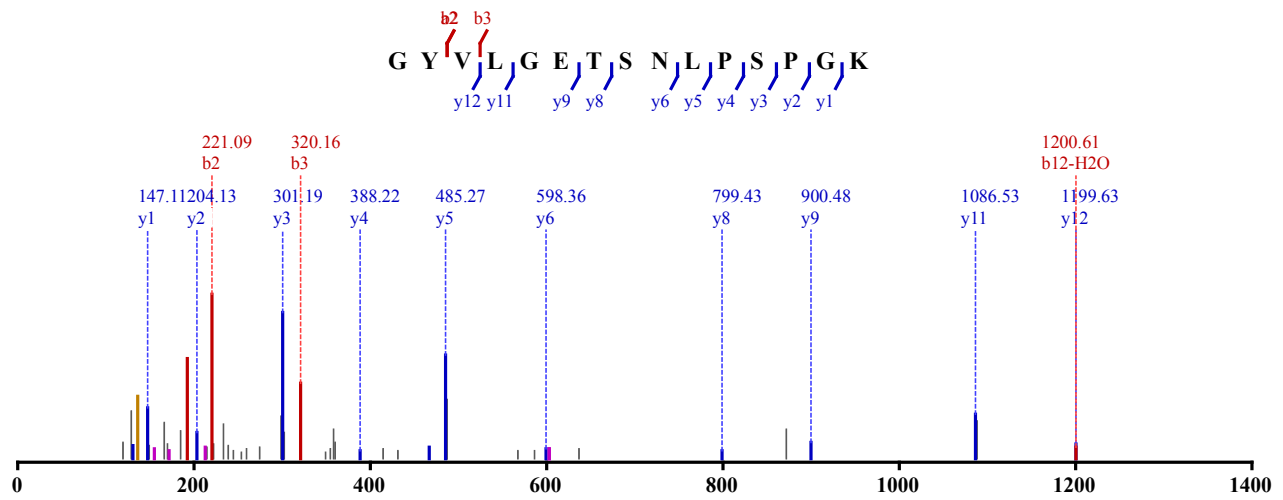

Not Modified

Identified in MSS485 with qvalue 0.00

Charge: 2, Exp. m/z: 759.893, Calc. m/z: 759.892

Data File: HeLa\_LysC\_pH11\_HCD\_2, Scans: 42525 - 42525

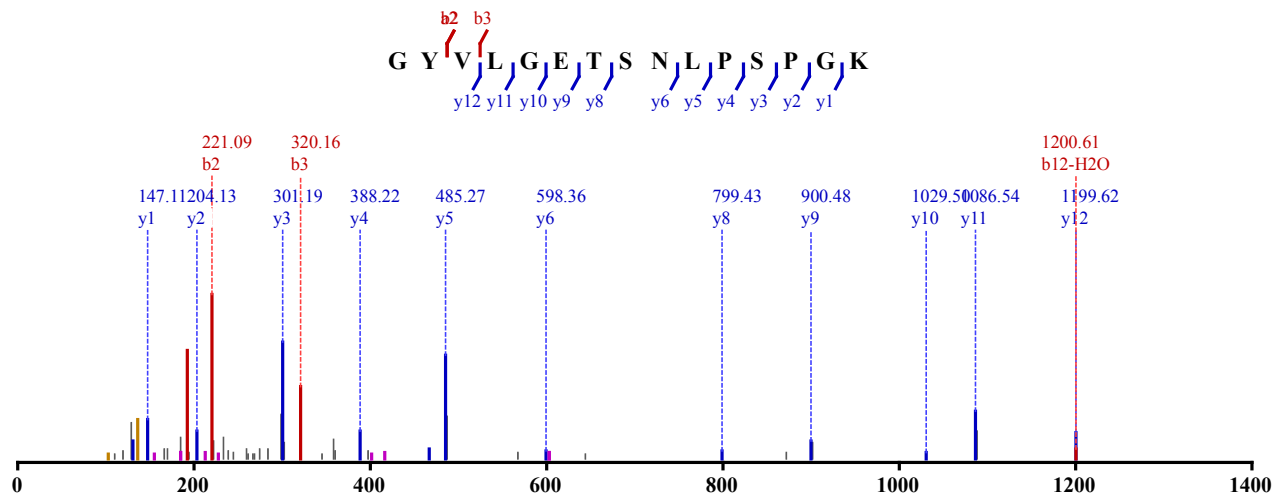

Not Modified

Identified in MSS485 with qvalue 0.00  
 Charge: 2, Exp. m/z: 759.893, Calc. m/z: 759.892  
 Data File: HeLa\_LysC\_pH8\_HCD\_1, Scans: 44580 - 44580

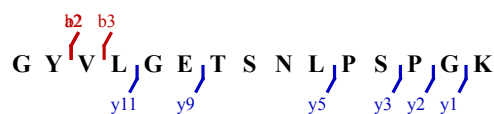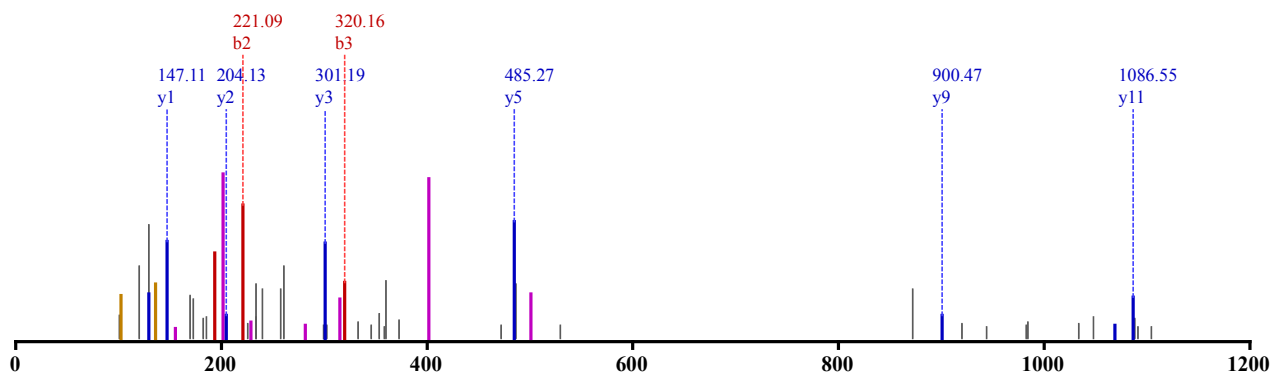

Not Modified  
 Identified in MSS485 with qvalue 0.00  
 Charge: 2, Exp. m/z: 759.893, Calc. m/z: 759.892  
 Data File: HeLa\_LysC\_pH8\_HCD\_2, Scans: 39269 - 39269

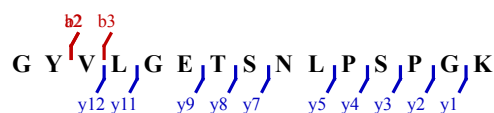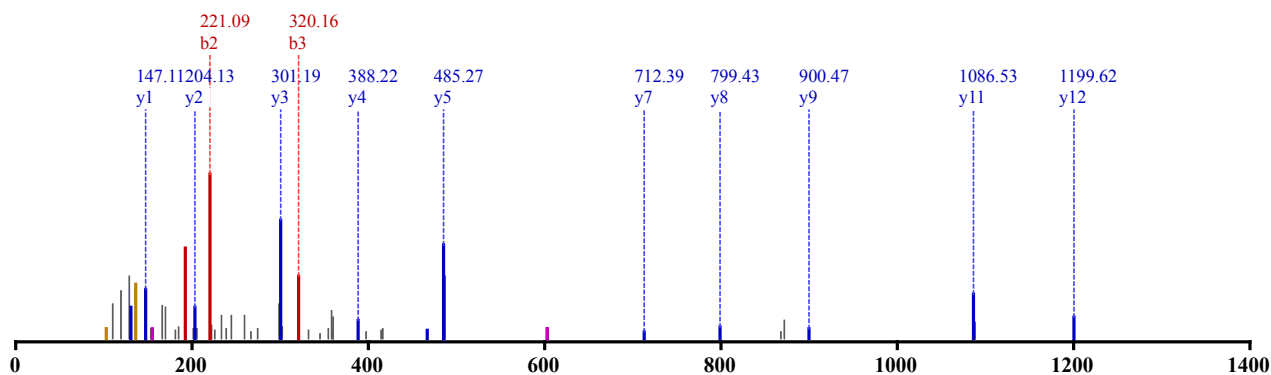

1 x Carbamidomethyl (C)  
 Identified in MSS485 with qvalue 0.00  
 Charge: 3, Exp. m/z: 711.016, Calc. m/z: 711.017  
 Data File: HeLa\_LysC\_80pcACN\_HCD\_3, Scans: 23809 - 23809

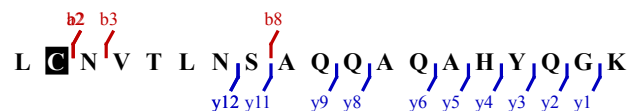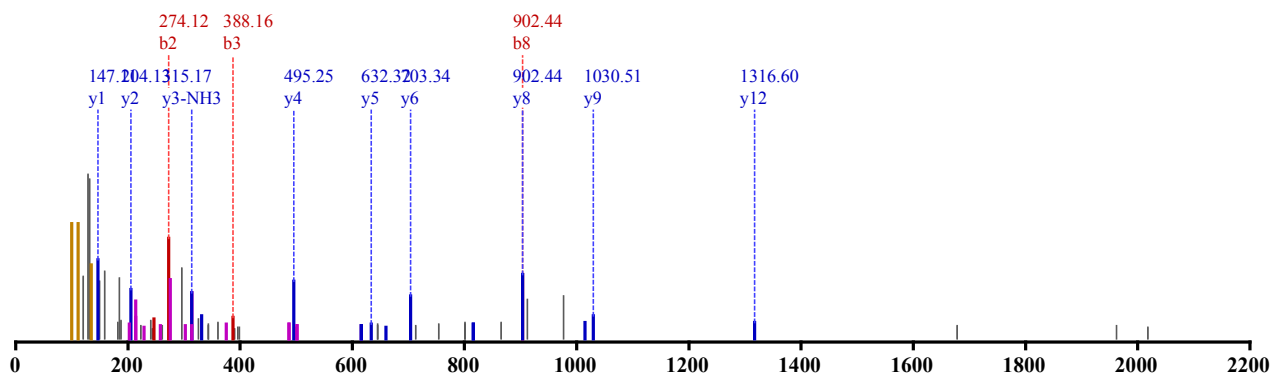

1 x Carbamidomethyl (C)  
 Identified in MSS485 with qvalue 0.00  
 Charge: 3, Exp. m/z: 711.347, Calc. m/z: 711.017  
 Data File: HeLa\_LysC\_80pcACN\_HCD\_1, Scans: 28448 - 28448

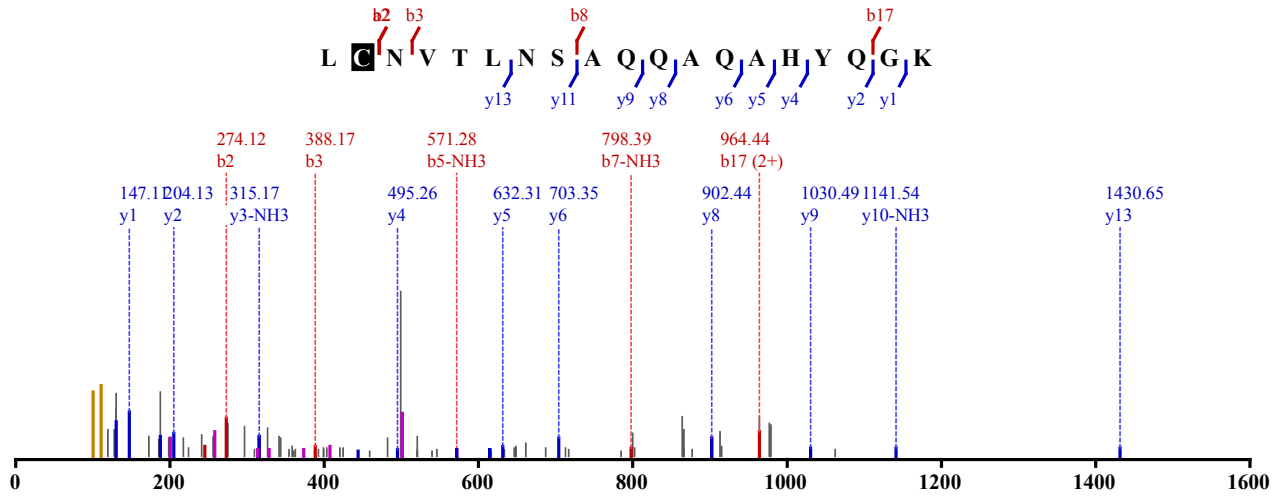

Not Modified  
 Identified in MSS30 with qvalue 0.00  
 Charge: 2, Exp. m/z: 493.758, Calc. m/z: 493.762  
 Data File: 20100611\_Velos1\_TaGe\_SA\_Hela\_1, Scans: 7128 - 7128

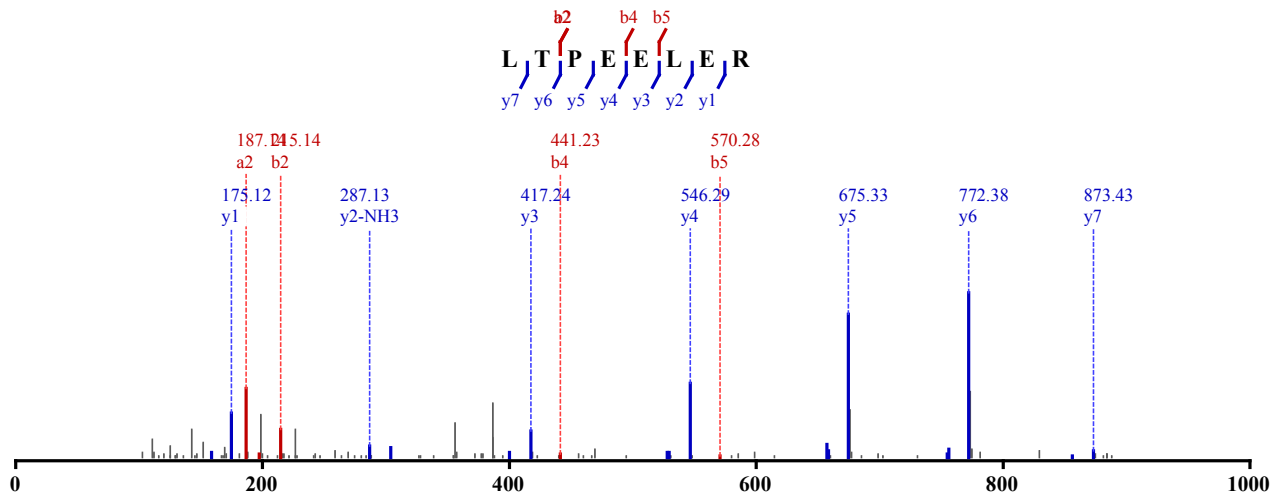

Not Modified  
 Identified in MSS30 with qvalue 0.00  
 Charge: 2, Exp. m/z: 493.759, Calc. m/z: 493.762  
 Data File: 20100611\_Velos1\_TaGe\_SA\_Hela\_2, Scans: 6787 - 6787

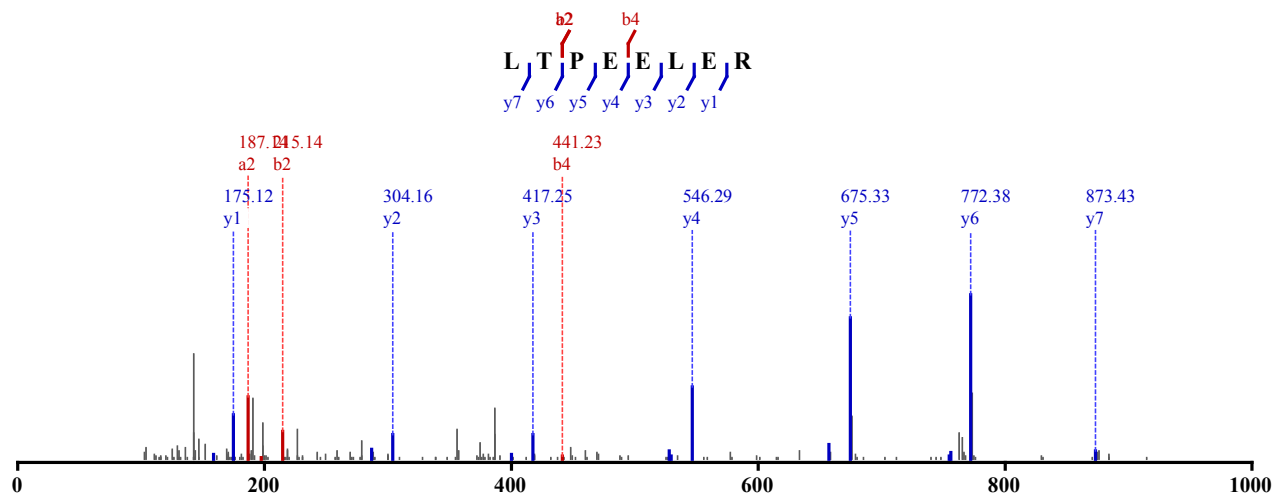

Not Modified  
 Identified in MSS30 with qvalue 0.00  
 Charge: 2, Exp. m/z: 493.759, Calc. m/z: 493.762  
 Data File: 20100611\_Velos1\_TaGe\_SA\_HeLa\_3, Scans: 6502 - 6502

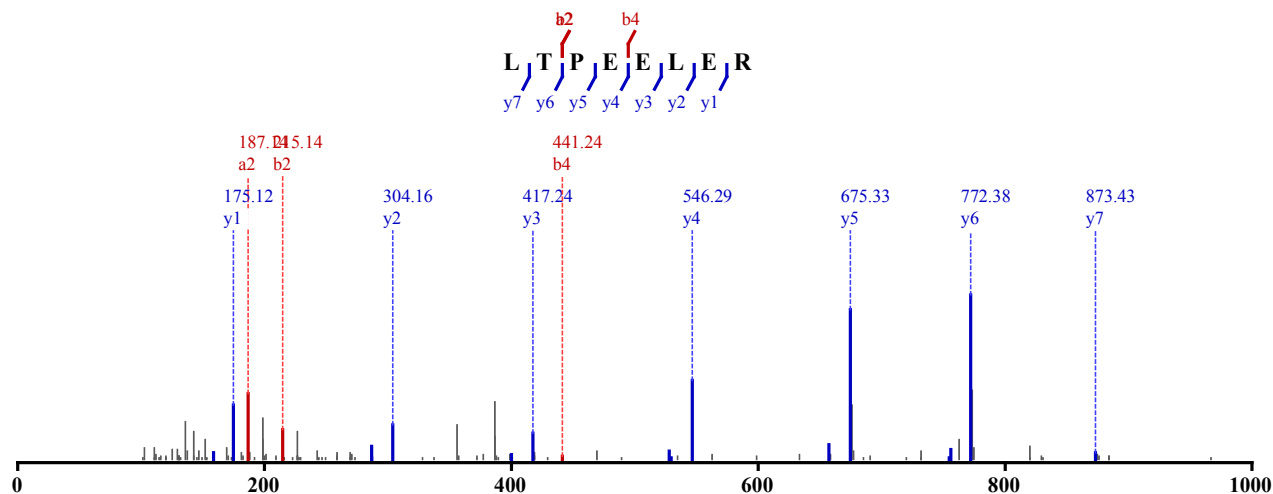

Not Modified  
 Identified in MSS30 with qvalue 0.00  
 Charge: 2, Exp. m/z: 493.760, Calc. m/z: 493.762  
 Data File: 20100726\_Velos1\_TaGe\_SA\_HeLa\_2, Scans: 7855 - 7855

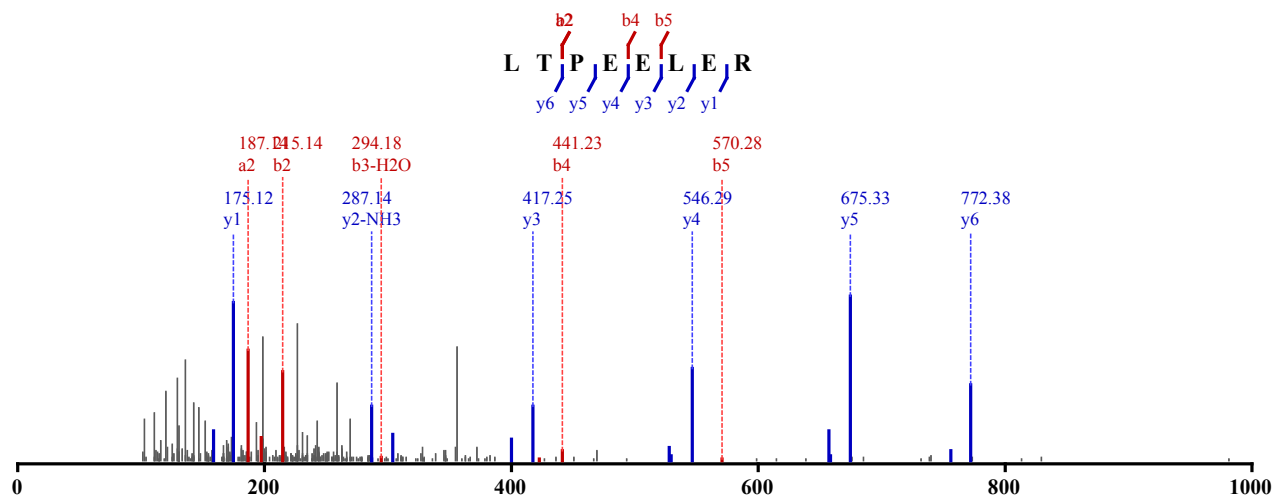

Not Modified  
 Identified in MSS30 with qvalue 0.00  
 Charge: 2, Exp. m/z: 493.762, Calc. m/z: 493.762



Data File: 20100726\_Velos1\_TaGe\_SA\_HeLa\_3, Scans: 7444 - 7444

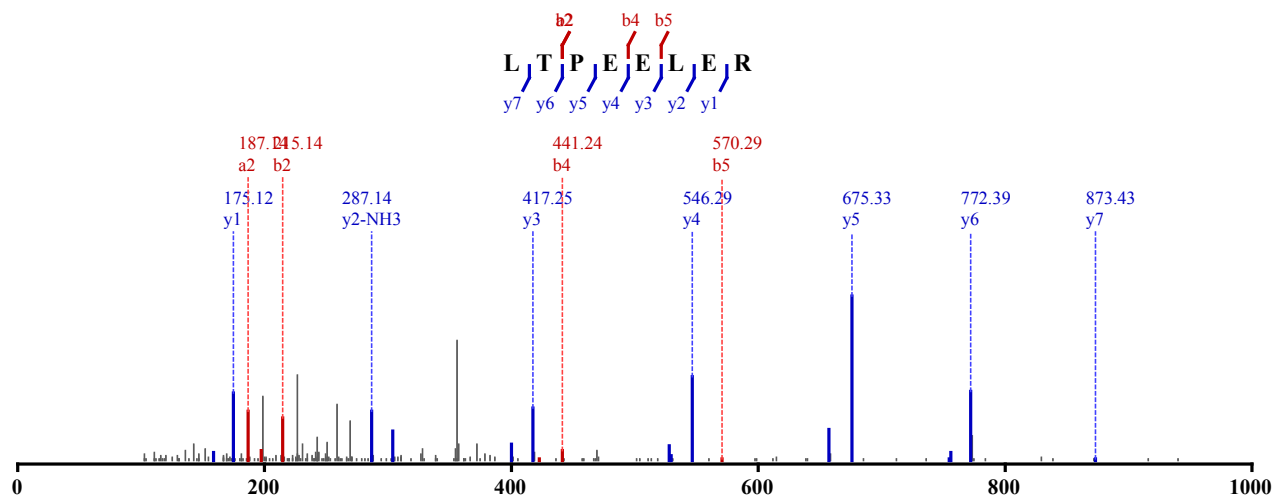

Not Modified

Identified in MSS30 with qvalue 0.00

Charge: 2, Exp. m/z: 493.762, Calc. m/z: 493.762

Data File: 20101224\_Velos1\_TaGe\_SA\_HeLa\_01, Scans: 9210 - 9210

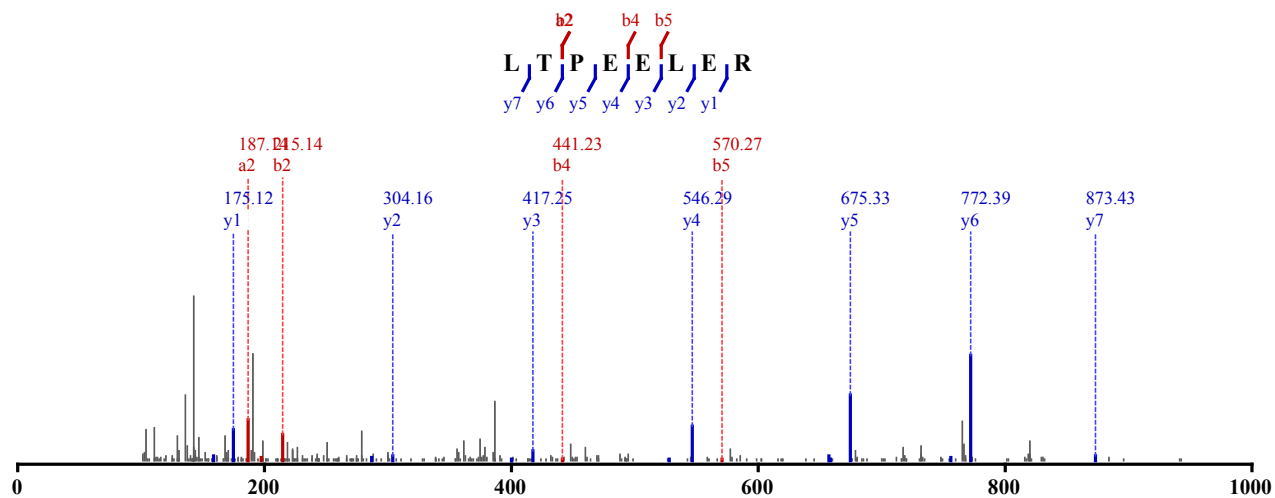

Not Modified

Identified in MSS30 with qvalue 0.00

Charge: 2, Exp. m/z: 493.762, Calc. m/z: 493.762

Data File: 20101224\_Velos1\_TaGe\_SA\_HeLa\_02, Scans: 7577 - 7577

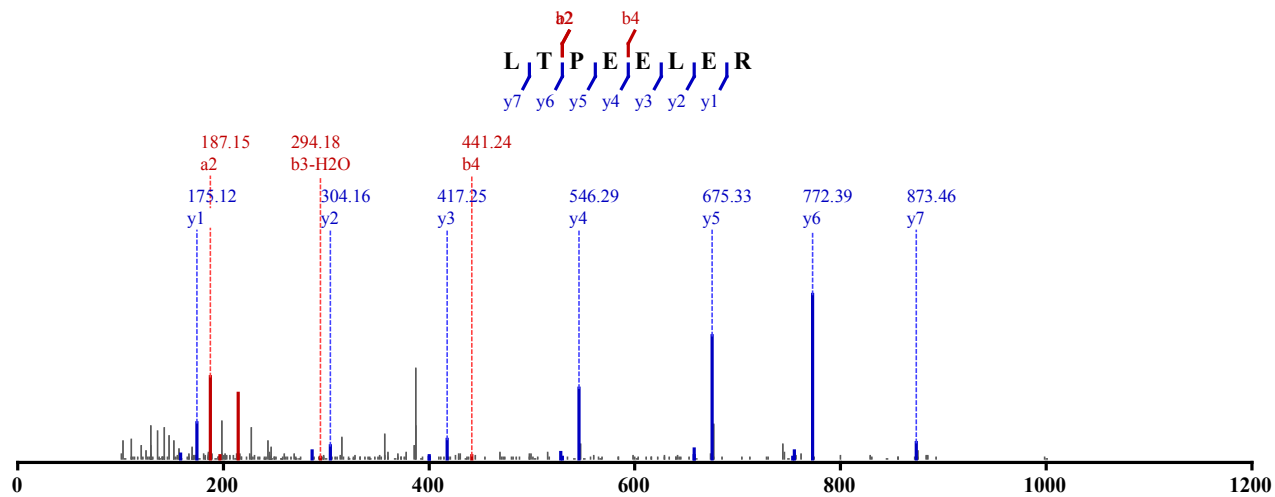

Not Modified

Identified in MSS30 with qvalue 0.00  
 Charge: 2, Exp. m/z: 493.763, Calc. m/z: 493.762  
 Data File: 20101224\_Velos1\_TaGe\_SA\_HeLa\_04, Scans: 7154 - 7154

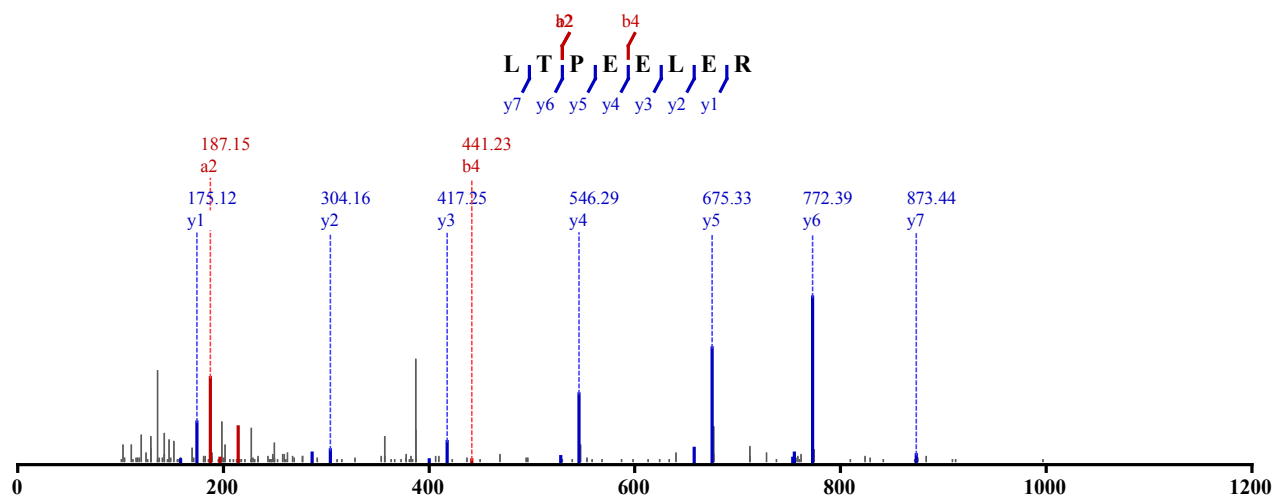

Not Modified  
 Identified in MSS30 with qvalue 0.00  
 Charge: 2, Exp. m/z: 493.763, Calc. m/z: 493.762  
 Data File: 20101224\_Velos1\_TaGe\_SA\_HeLa\_05, Scans: 6761 - 6761

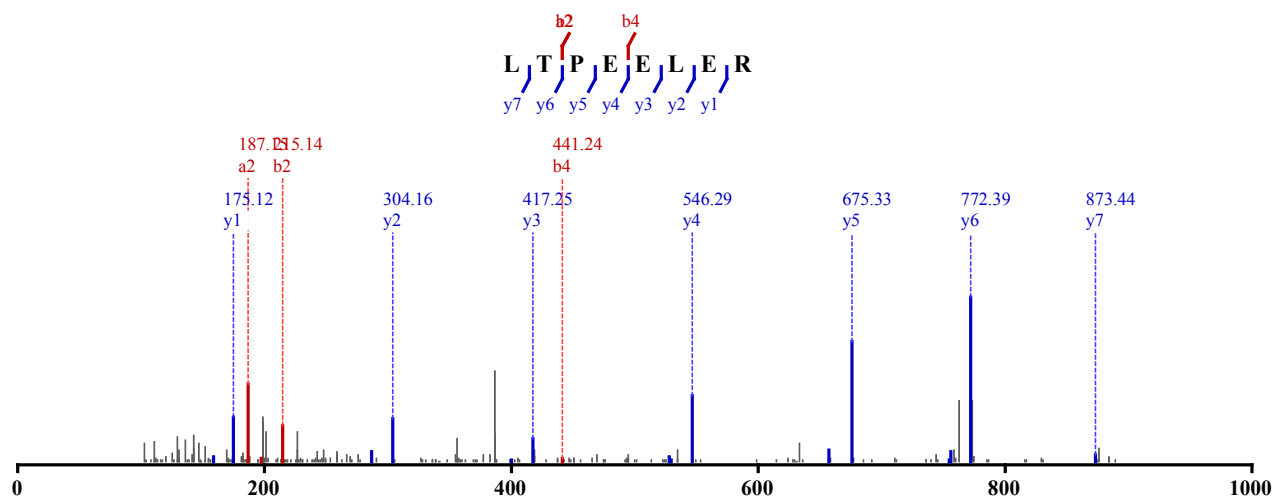

Not Modified  
 Identified in MSS122 with qvalue 0.00  
 Charge: 2, Exp. m/z: 493.761, Calc. m/z: 493.762  
 Data File: HeLa\_try\_HCD\_2, Scans: 17479 - 17479

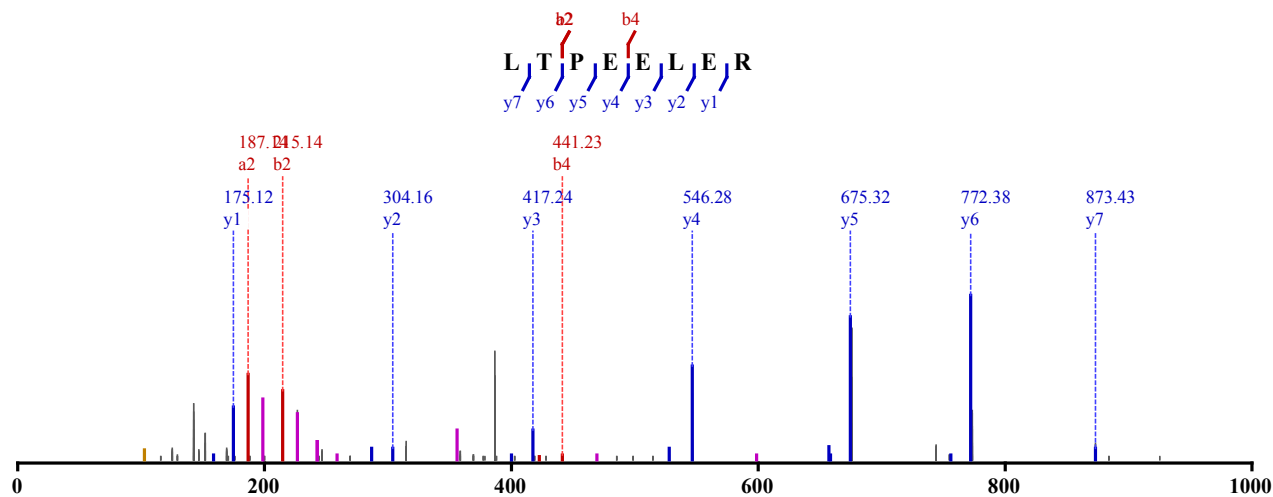

Not Modified

Identified in MSS122 with qvalue 0.00

Charge: 2, Exp. m/z: 493.760, Calc. m/z: 493.762

Data File: HeLa\_try\_HCD\_3, Scans: 17401 - 17401

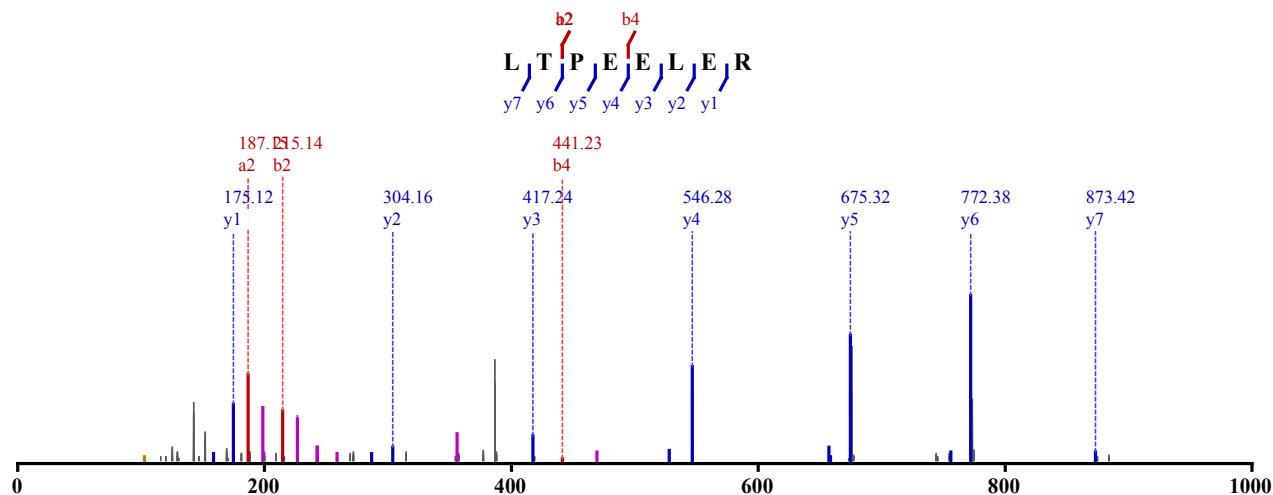

Not Modified

Identified in MSS130 with qvalue 0.00

Charge: 2, Exp. m/z: 493.761, Calc. m/z: 493.762

Data File: HeLa\_LysC-try\_HCD\_1, Scans: 10652 - 10652

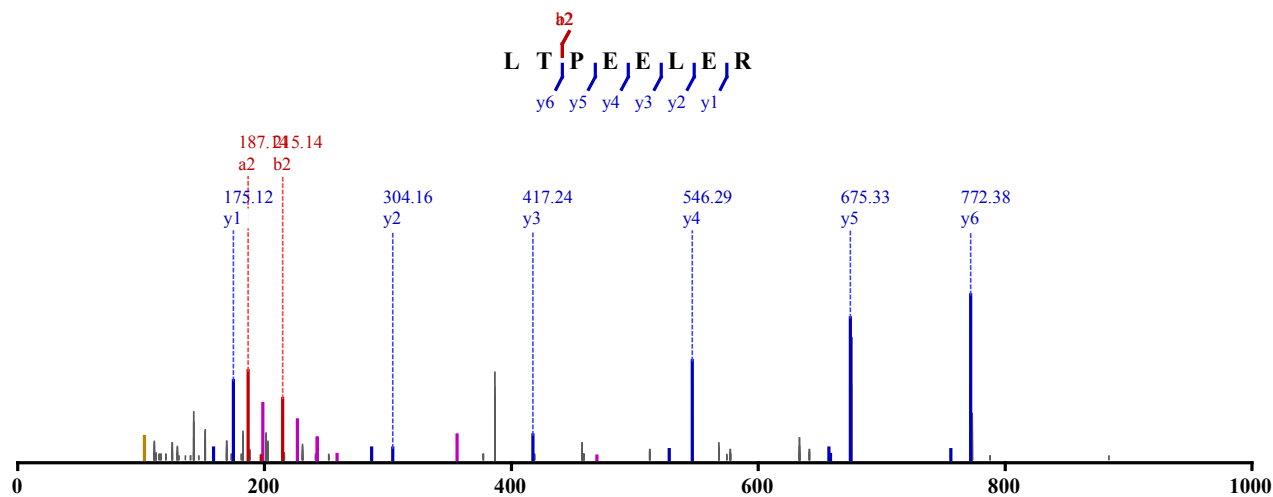

Not Modified

Identified in MSS130 with qvalue 0.00

Charge: 2, Exp. m/z: 493.762, Calc. m/z: 493.762

Data File: HeLa\_LysC-try\_HCD\_2, Scans: 18034 - 18034

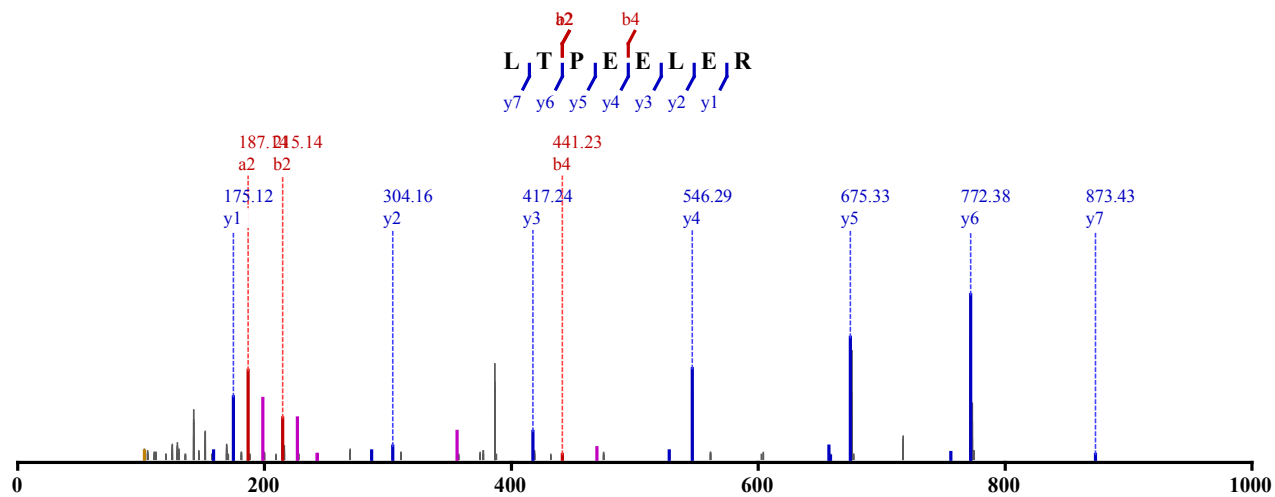

Not Modified

Identified in MSS130 with qvalue 0.00

Charge: 2, Exp. m/z: 493.760, Calc. m/z: 493.762

Data File: HeLa\_LysC-try\_HCD\_2, Scans: 18193 - 18193

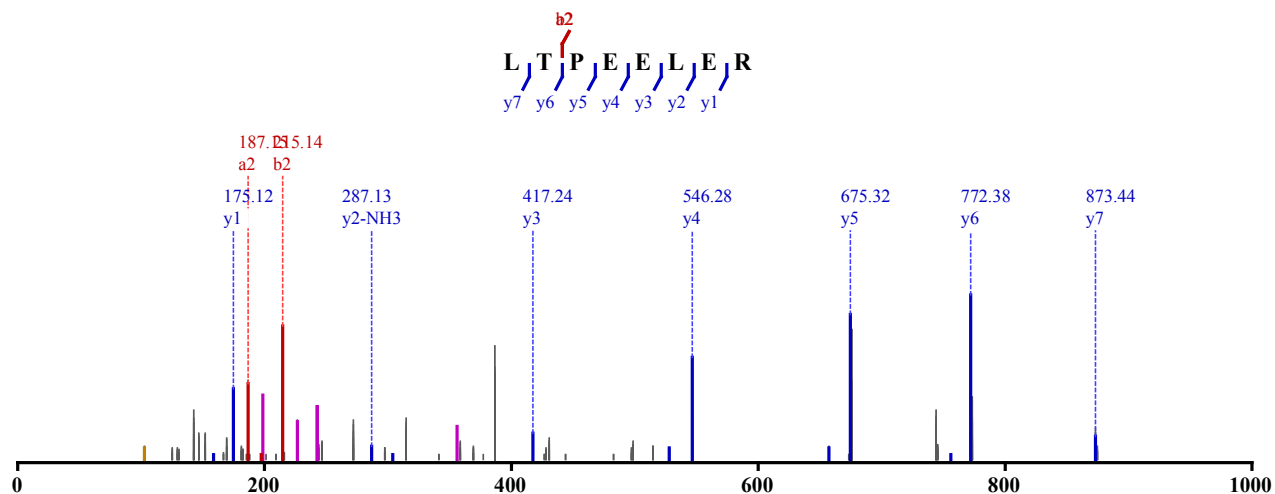

Not Modified

Identified in MSS130 with qvalue 0.00

Charge: 2, Exp. m/z: 493.761, Calc. m/z: 493.762

Data File: HeLa\_LysC-try\_HCD\_3, Scans: 17862 - 17862

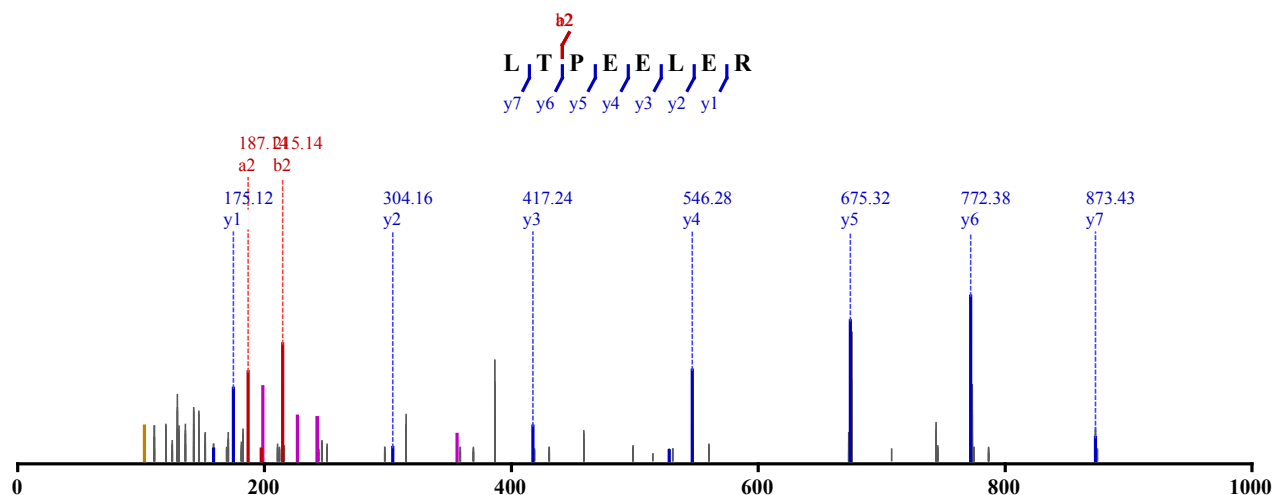

Not Modified

Identified in MSS130 with qvalue 0.00

Charge: 2, Exp. m/z: 493.761, Calc. m/z: 493.762

Data File: HeLa\_LysC-try\_HCD\_3, Scans: 17617 - 17617

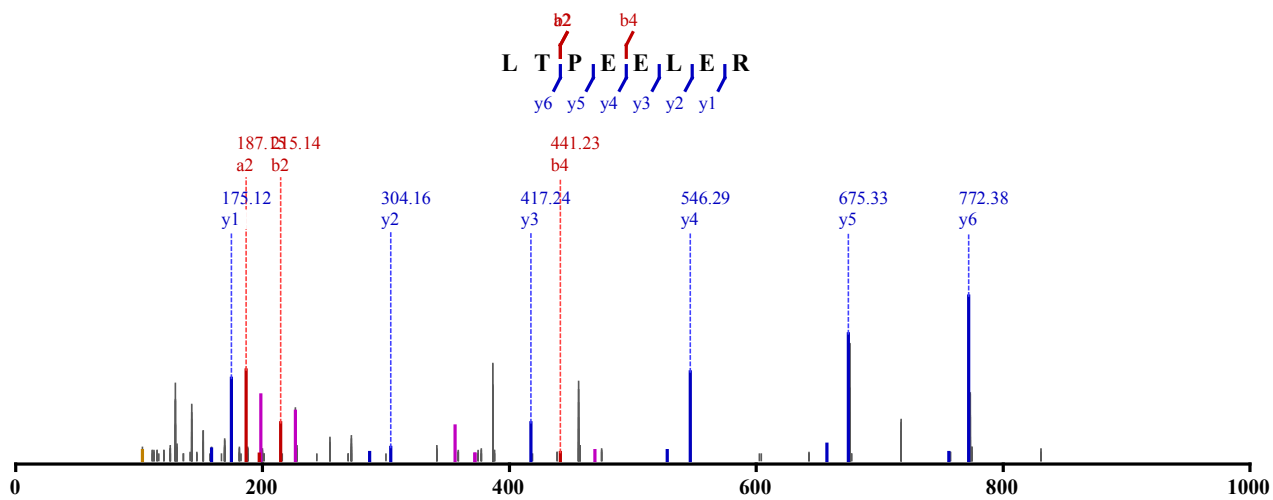

Not Modified

Identified in MSS134 with qvalue 0.00

Charge: 2, Exp. m/z: 493.762, Calc. m/z: 493.762

Data File: HeLa\_GluC-try\_HCD\_2, Scans: 17438 - 17438

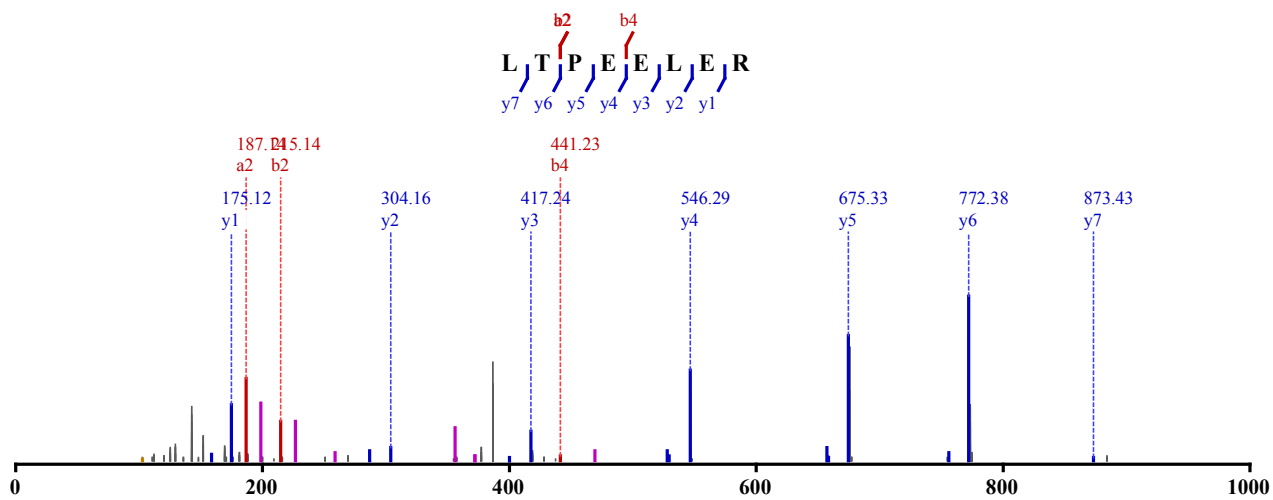

Not Modified

Identified in MSS134 with qvalue 0.00

Charge: 2, Exp. m/z: 493.760, Calc. m/z: 493.762

Data File: HeLa\_GluC-try\_HCD\_3, Scans: 16713 - 16713

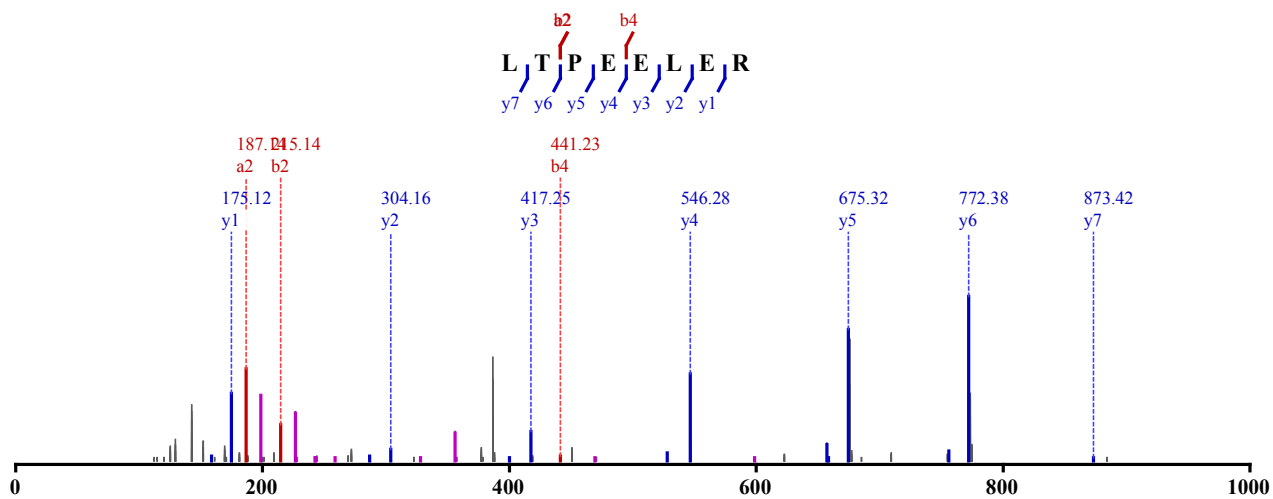

Not Modified



Not Modified

Identified in MSS139 with qvalue 0.00

Charge: 2, Exp. m/z: 493.761, Calc. m/z: 493.762

Data File: HeLa\_chytry-try\_HCD\_1, Scans: 16917 - 16917

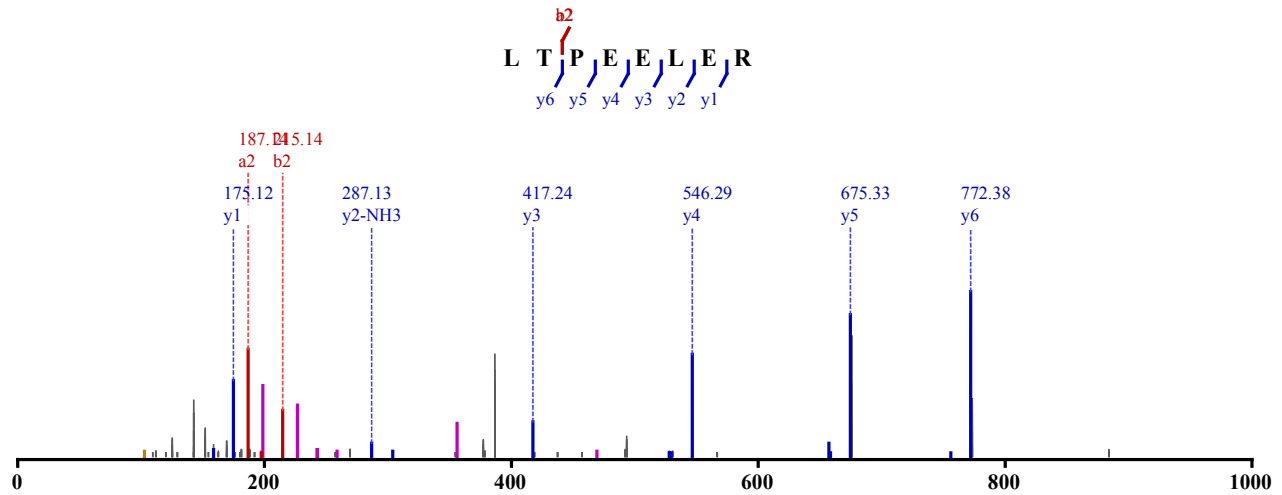

Not Modified

Identified in MSS139 with qvalue 0.00

Charge: 2, Exp. m/z: 493.760, Calc. m/z: 493.762

Data File: HeLa\_chytry-try\_HCD\_2, Scans: 17661 - 17661

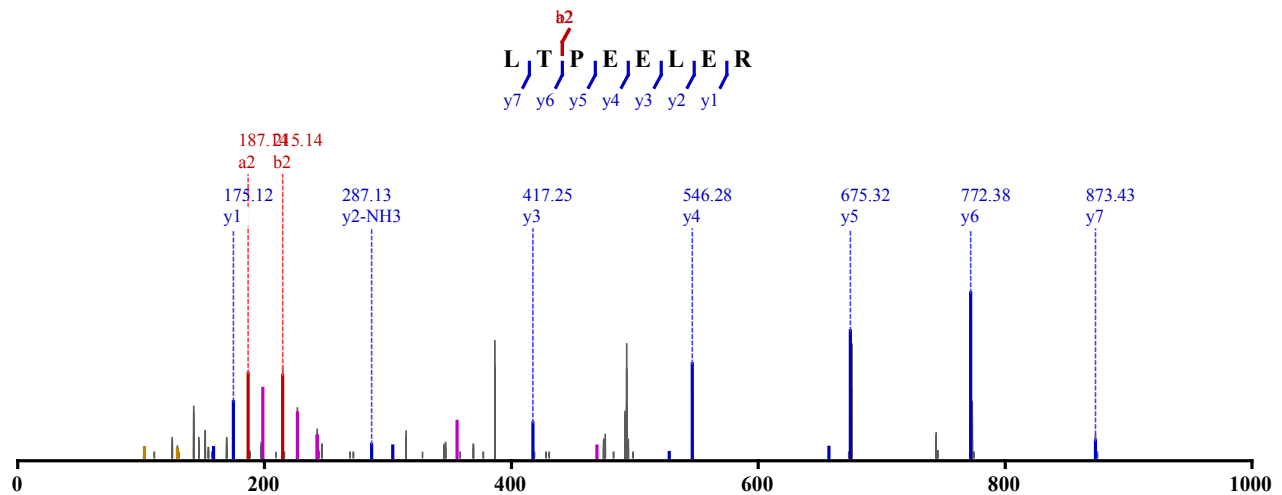

Not Modified

Identified in MSS139 with qvalue 0.00

Charge: 2, Exp. m/z: 493.762, Calc. m/z: 493.762

Data File: HeLa\_chytry-try\_HCD\_3, Scans: 17178 - 17178

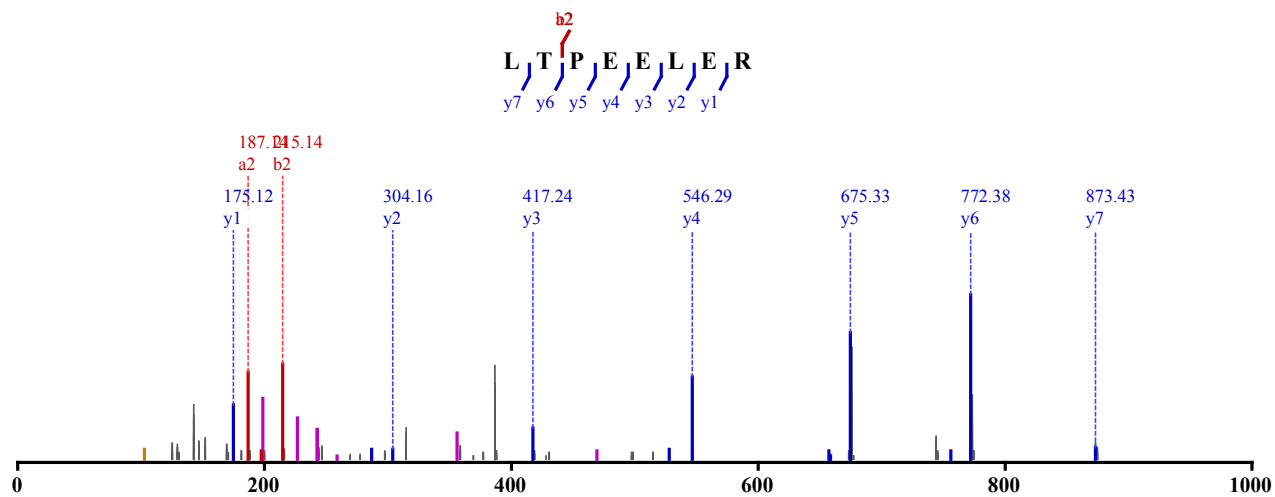

Not Modified

Identified in MSS141 with qvalue 0.00

Charge: 2, Exp. m/z: 493.760, Calc. m/z: 493.762

Data File: HeLa\_AspN-try\_HCD\_1, Scans: 17337 - 17337

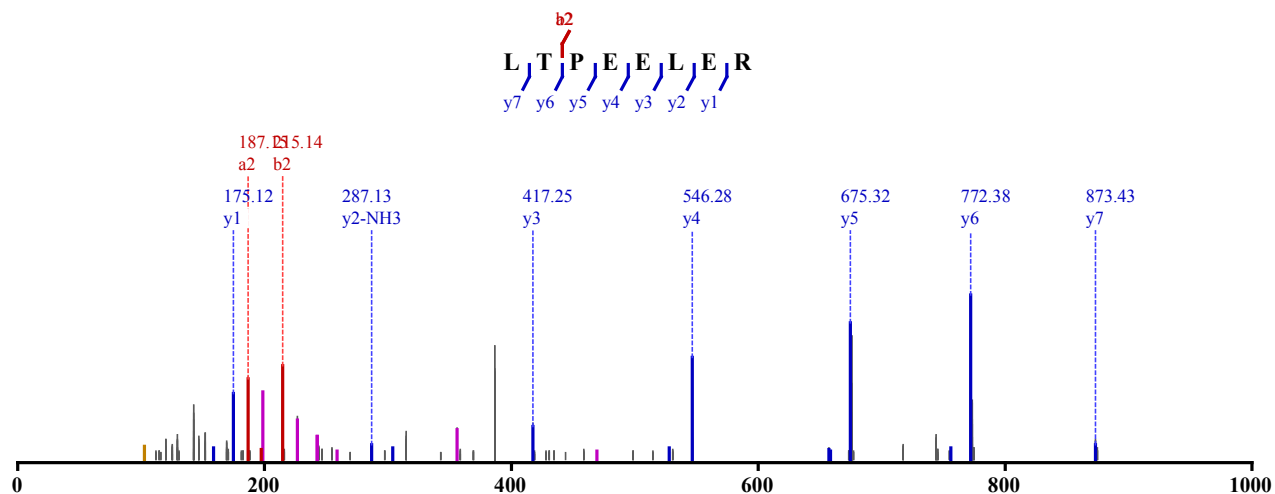

Not Modified

Identified in MSS141 with qvalue 0.00

Charge: 2, Exp. m/z: 493.760, Calc. m/z: 493.762

Data File: HeLa\_AspN-try\_HCD\_1, Scans: 17494 - 17494

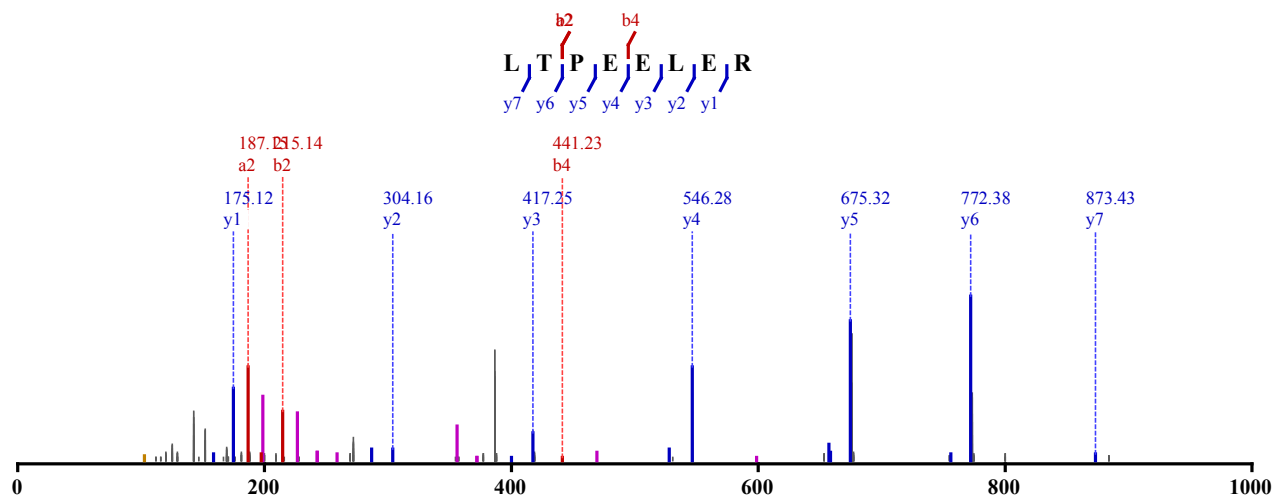

Not Modified

Identified in MSS141 with qvalue 0.00

Charge: 2, Exp. m/z: 493.760, Calc. m/z: 493.762



Data File: HeLa\_AspN-try\_HCD\_2, Scans: 17065 - 17065

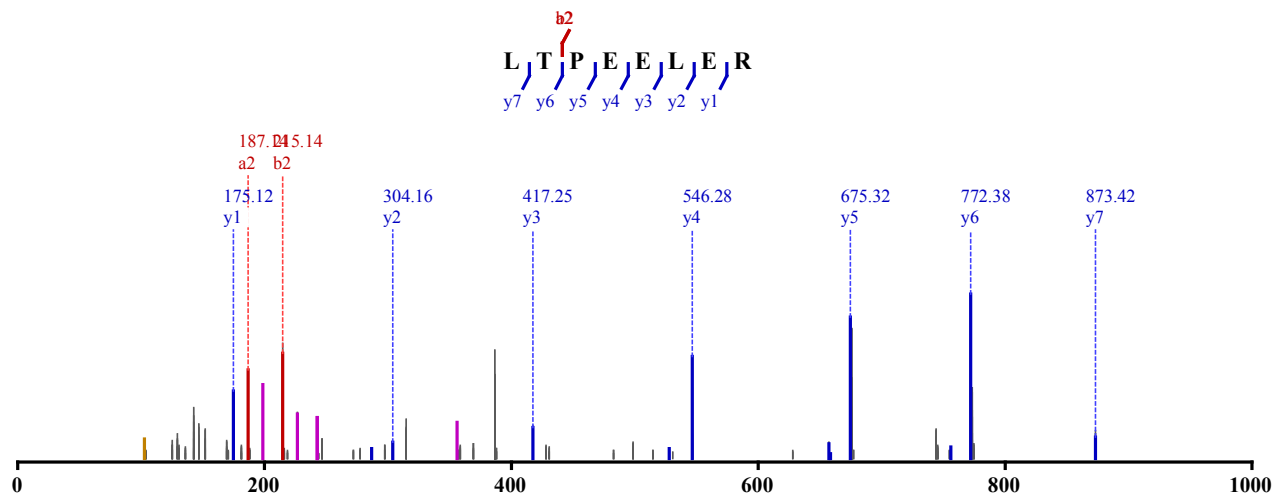

Not Modified

Identified in MSS141 with qvalue 0.00

Charge: 2, Exp. m/z: 493.761, Calc. m/z: 493.762

Data File: HeLa\_AspN-try\_HCD\_3, Scans: 14175 - 14175

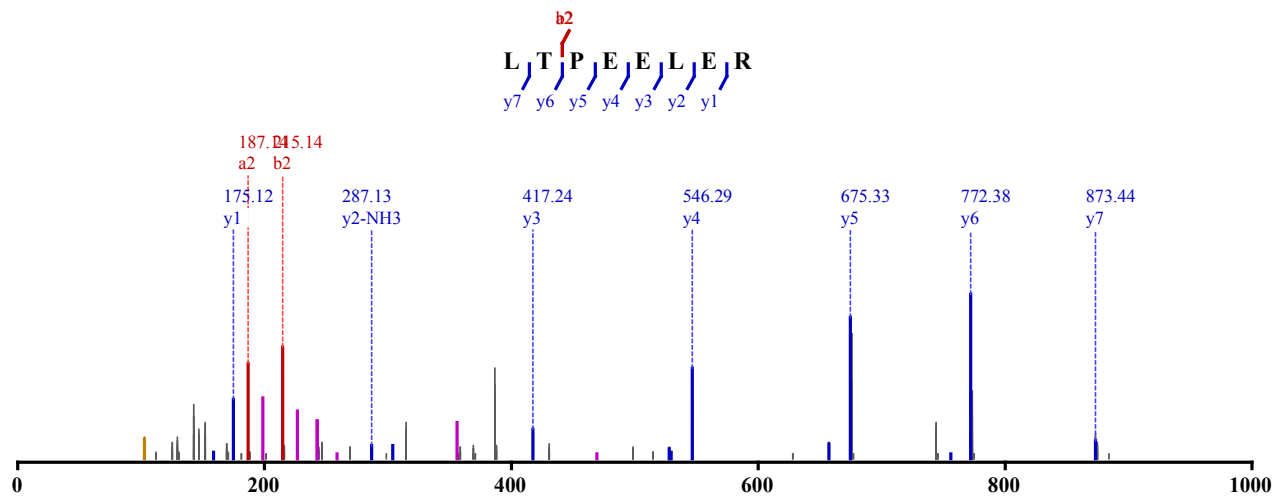

Not Modified

Identified in MSS241 with qvalue 0.00

Charge: 2, Exp. m/z: 493.761, Calc. m/z: 493.762

Data File: HeLa\_try\_CID-ETD\_1, Scans: 13192 - 13192

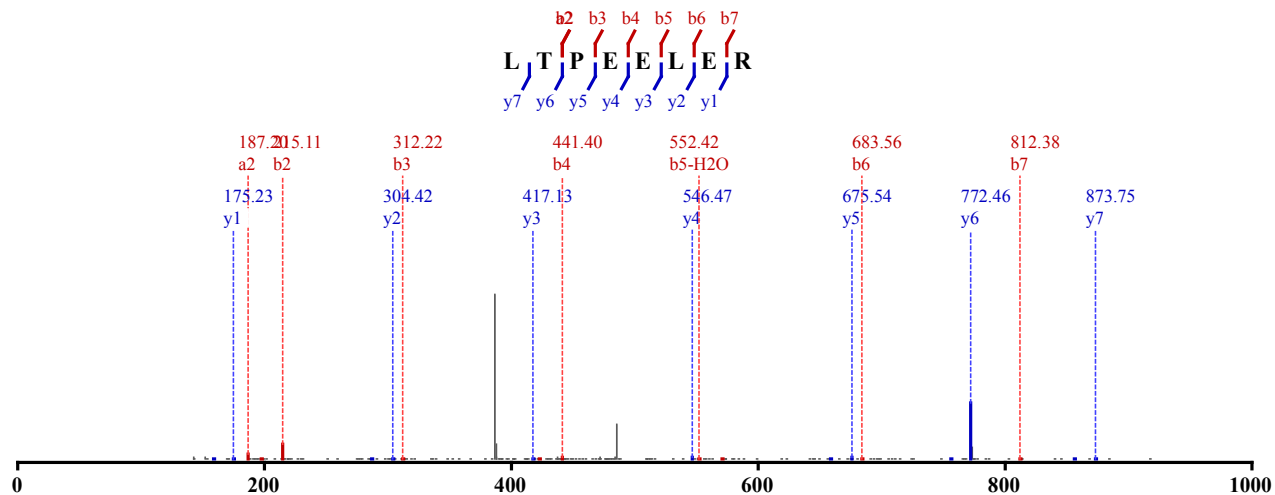

Not Modified

Identified in MSS241 with qvalue 0.00  
 Charge: 2, Exp. m/z: 493.762, Calc. m/z: 493.762  
 Data File: HeLa\_try\_CID-ETD\_2, Scans: 12263 - 12263

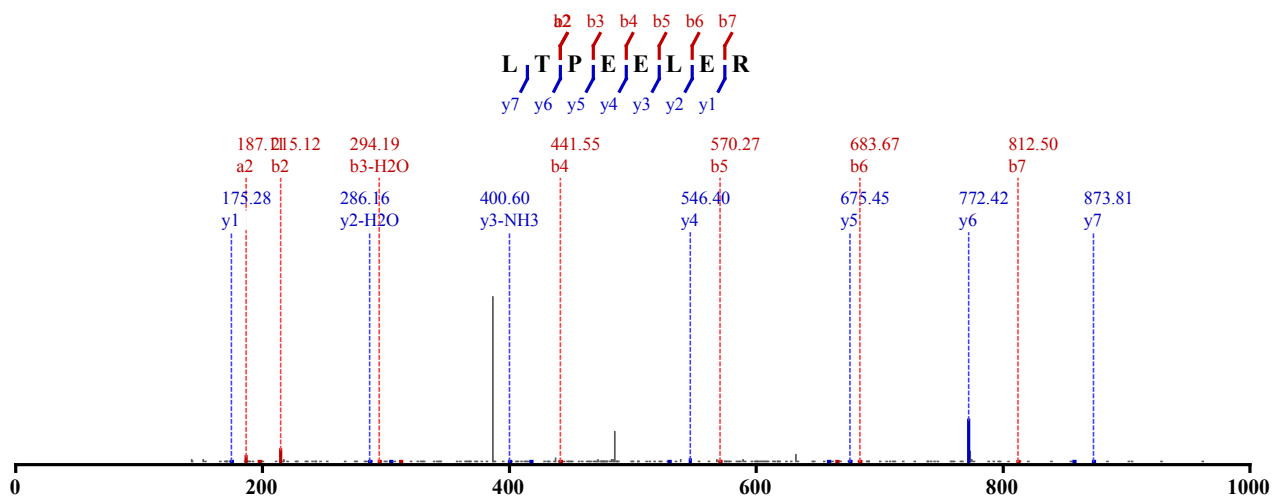

Not Modified  
 Identified in MSS241 with qvalue 0.00  
 Charge: 2, Exp. m/z: 493.762, Calc. m/z: 493.762  
 Data File: HeLa\_Try\_CID-ETD\_3, Scans: 11735 - 11735

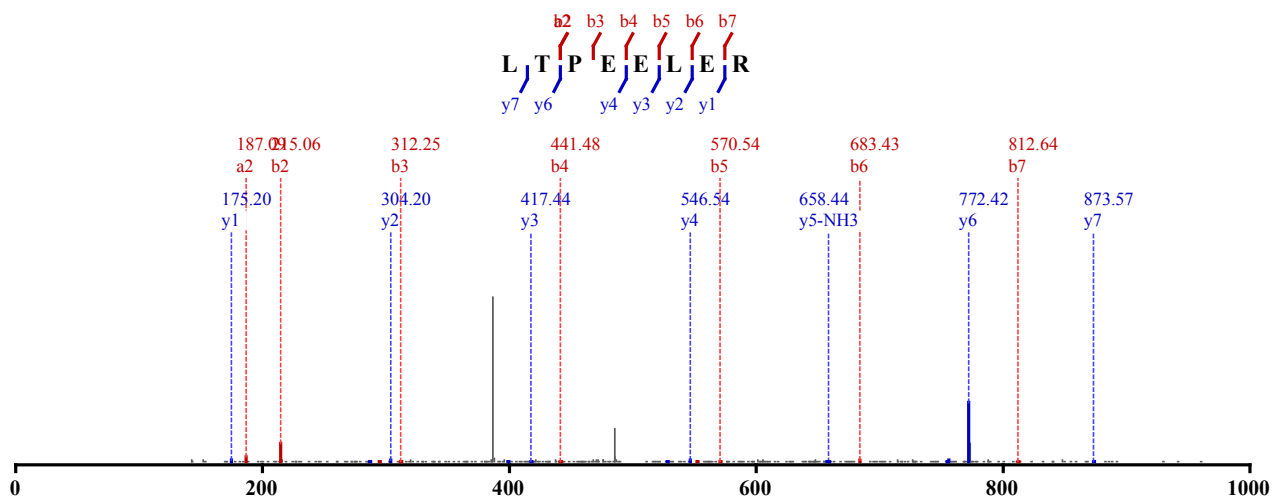

Not Modified  
 Identified in MSS241 with qvalue 0.00  
 Charge: 2, Exp. m/z: 493.762, Calc. m/z: 493.762  
 Data File: HeLa\_Try\_CID-ETD\_3, Scans: 11818 - 11818

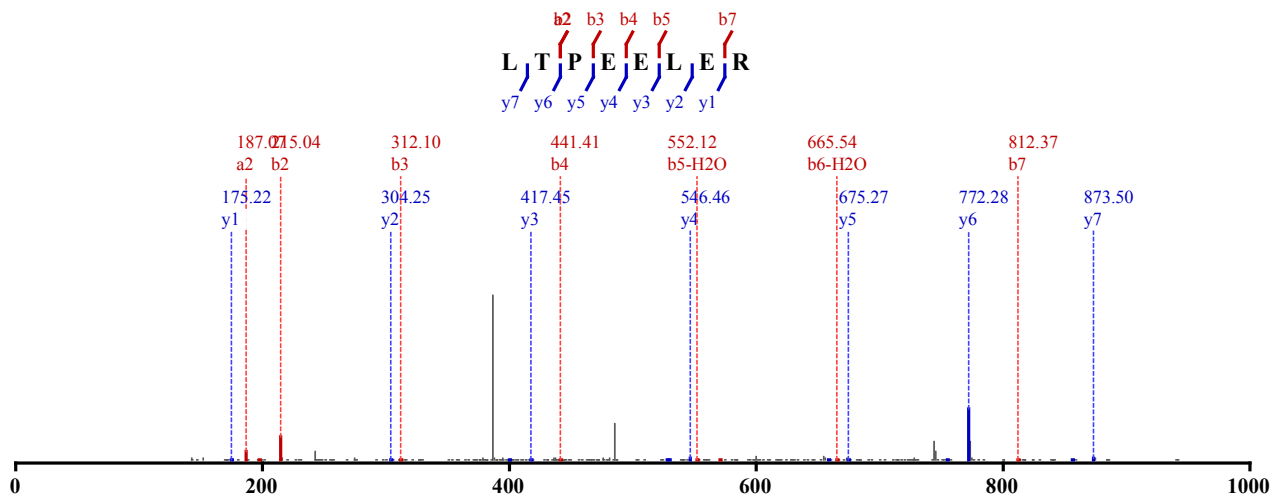

Not Modified

Identified in MSS248 with qvalue 0.01

Charge: 2, Exp. m/z: 493.761, Calc. m/z: 493.762

Data File: HeLa\_Try\_ETD\_2, Scans: 7588 - 7588

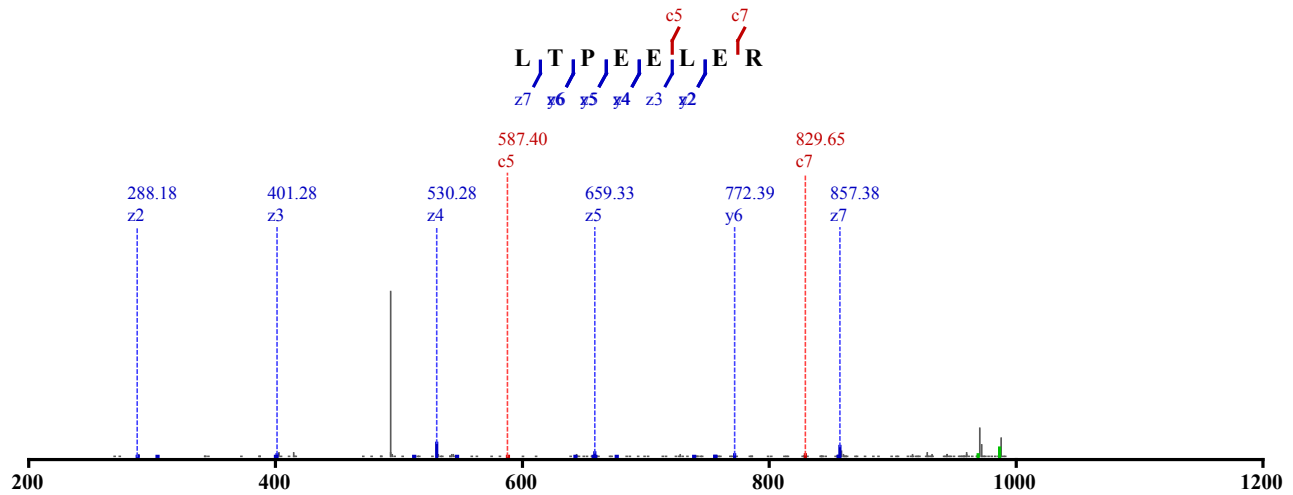

Not Modified

Identified in MSS257 with qvalue 0.00

Charge: 2, Exp. m/z: 493.762, Calc. m/z: 493.762

Data File: HeLa\_ArgC\_HCD\_3, Scans: 18720 - 18720

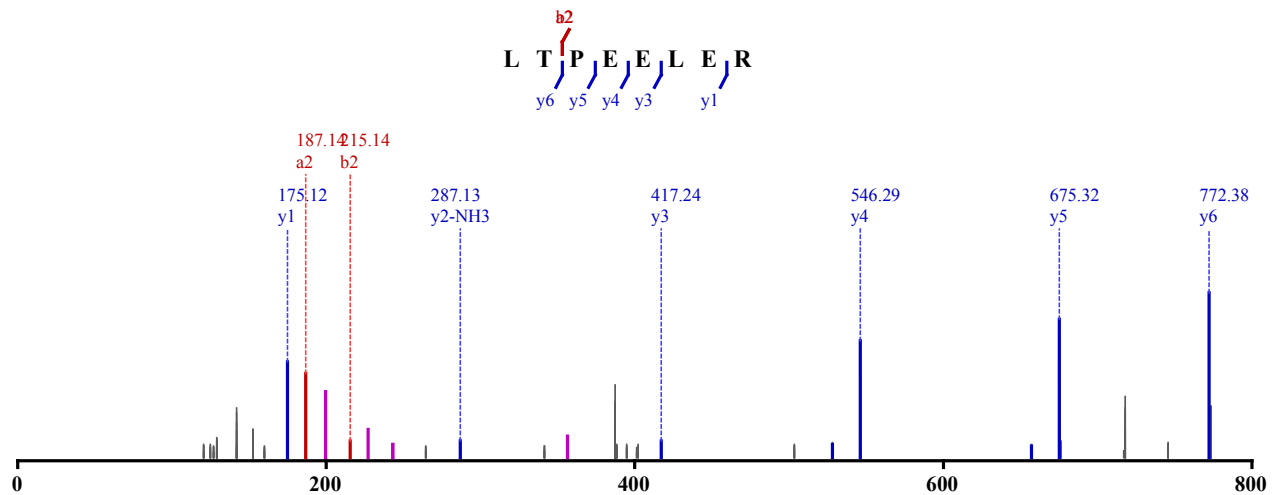

Not Modified

Identified in MSS255 with qvalue 0.01

Charge: 2, Exp. m/z: 493.763, Calc. m/z: 493.762

Data File: HeLa\_ArgC\_CID\_3, Scans: 12038 - 12038

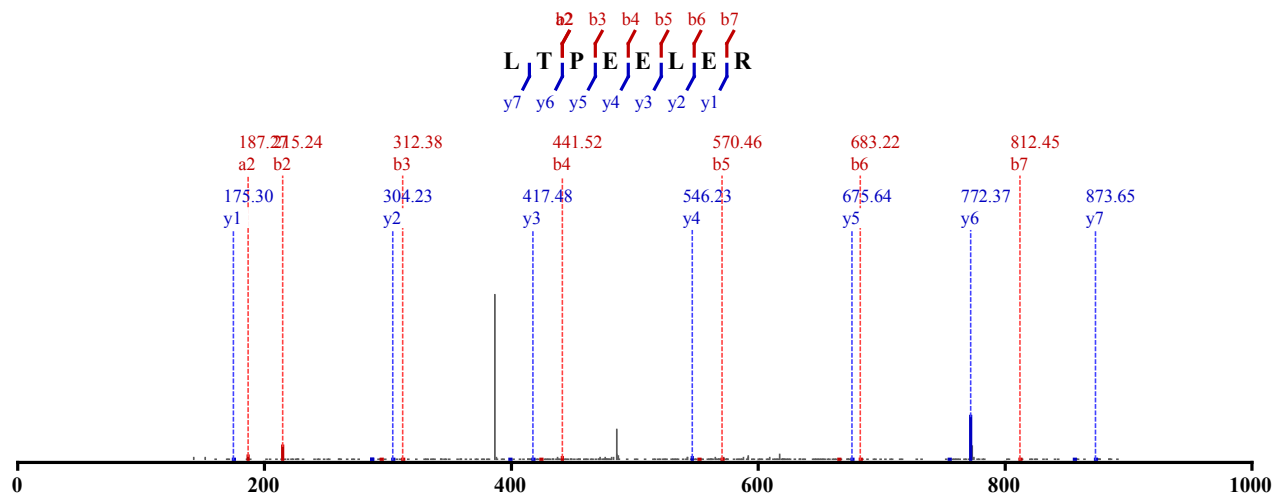

Not Modified

Identified in MSS259 with qvalue 0.00

Charge: 2, Exp. m/z: 493.762, Calc. m/z: 493.762

Data File: HeLa\_ArgC-LysC\_CID\_1, Scans: 13076 - 13076

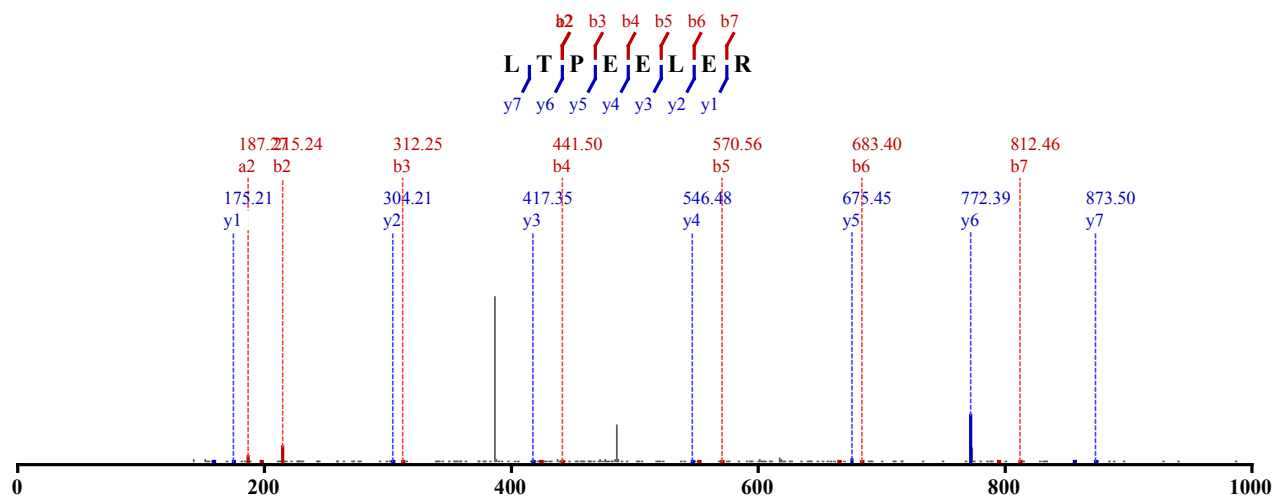

Not Modified

Identified in MSS262 with qvalue 0.00

Charge: 2, Exp. m/z: 493.762, Calc. m/z: 493.762

Data File: HeLa\_ArgC-Try\_CID\_1, Scans: 13286 - 13286

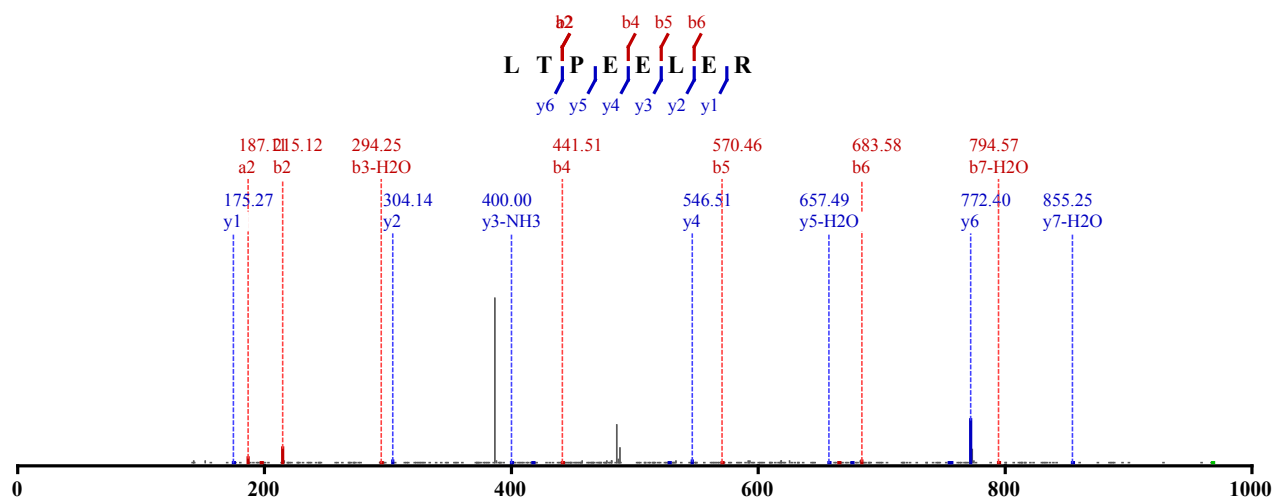

Not Modified

Identified in MSS262 with qvalue 0.01

Charge: 2, Exp. m/z: 493.762, Calc. m/z: 493.762

Data File: HeLa\_ArgC-Try\_CID\_3, Scans: 12771 - 12771

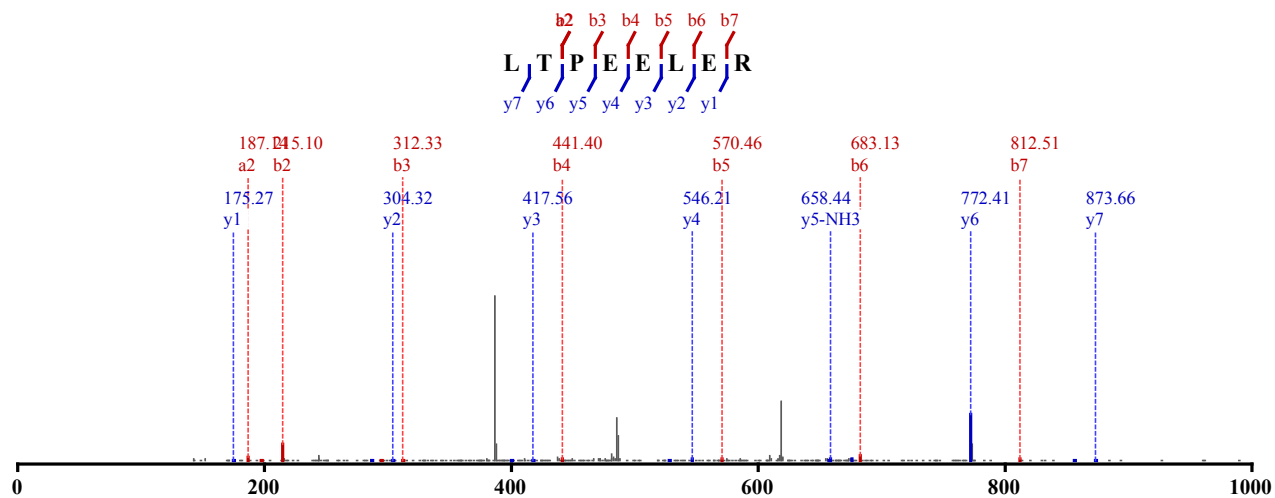

Not Modified

Identified in MSS268 with qvalue 0.00

Charge: 2, Exp. m/z: 493.761, Calc. m/z: 493.762

Data File: HeLa\_ArgC-GluC\_HCD\_1, Scans: 18741 - 18741

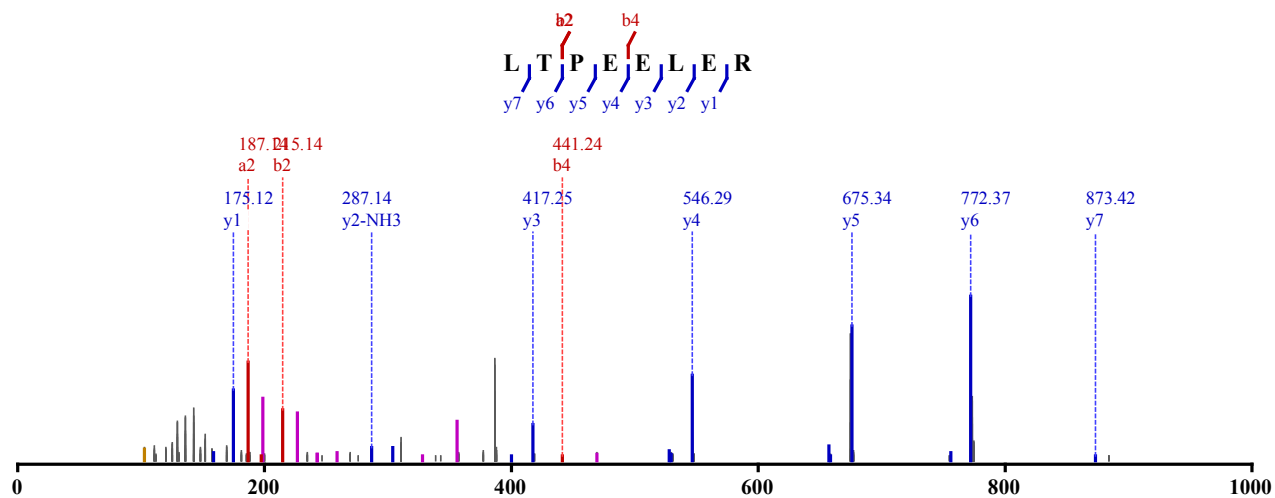

Not Modified

Identified in MSS268 with qvalue 0.00

Charge: 2, Exp. m/z: 493.761, Calc. m/z: 493.762

Data File: HeLa\_ArgC-GluC\_HCD\_1, Scans: 18866 - 18866

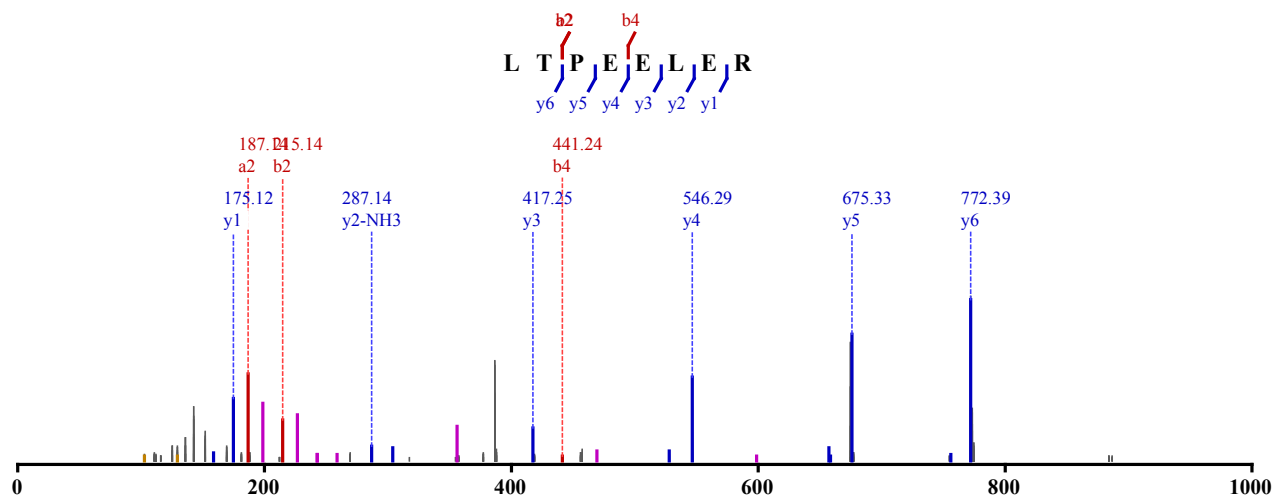

Not Modified

Identified in MSS268 with qvalue 0.00  
 Charge: 2, Exp. m/z: 493.761, Calc. m/z: 493.762  
 Data File: HeLa\_ArgC-GluC\_HCD\_2, Scans: 18651 - 18651

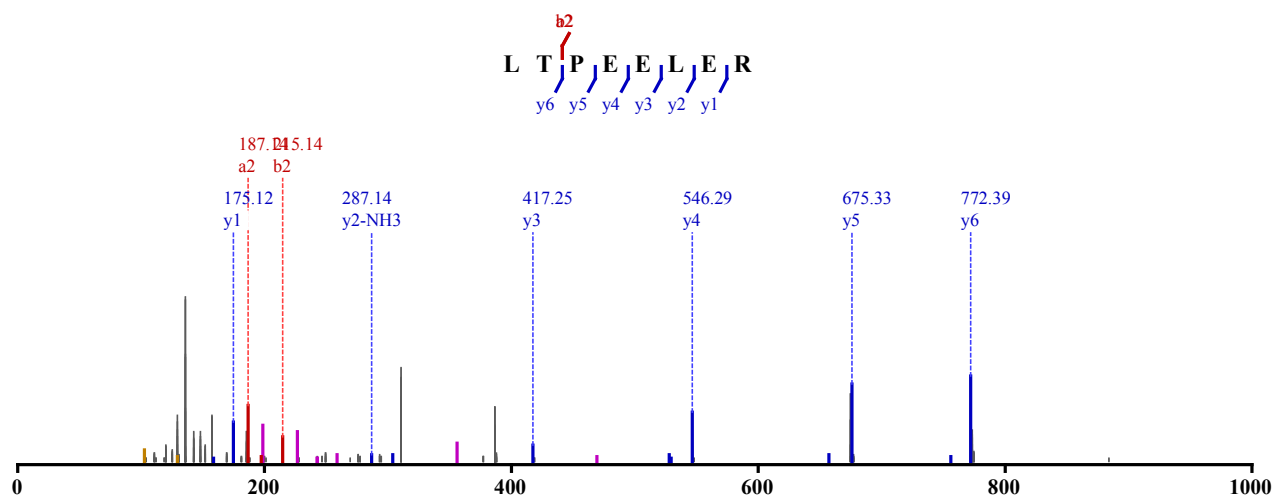

Not Modified  
 Identified in MSS268 with qvalue 0.00  
 Charge: 2, Exp. m/z: 493.761, Calc. m/z: 493.762  
 Data File: HeLa\_ArgC-GluC\_HCD\_2, Scans: 18778 - 18778

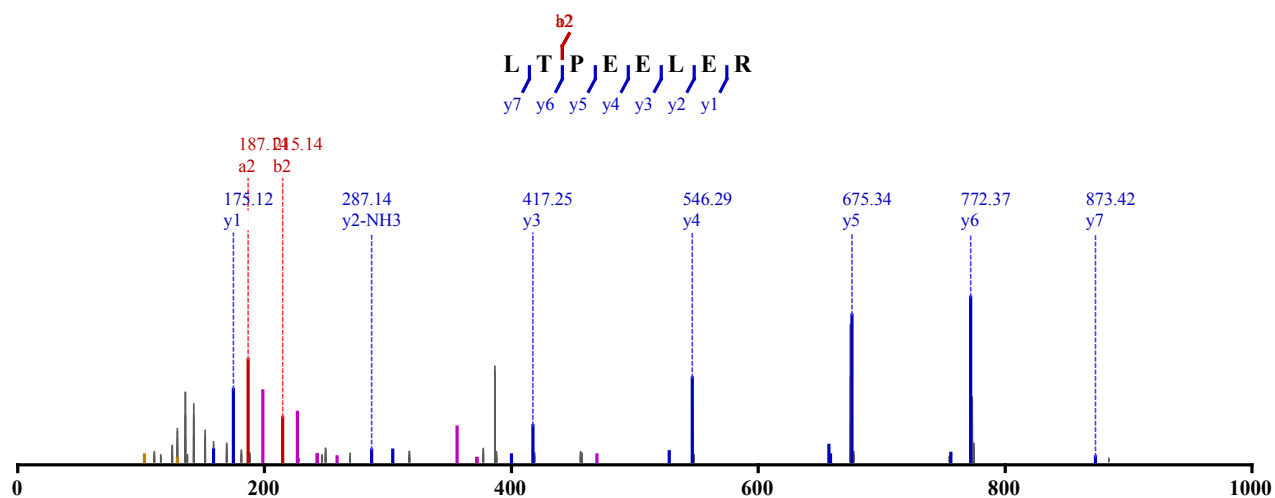

Not Modified  
 Identified in MSS270 with qvalue 0.00  
 Charge: 2, Exp. m/z: 493.761, Calc. m/z: 493.762  
 Data File: HeLa\_ArgC-AspN\_HCD\_1, Scans: 17452 - 17452

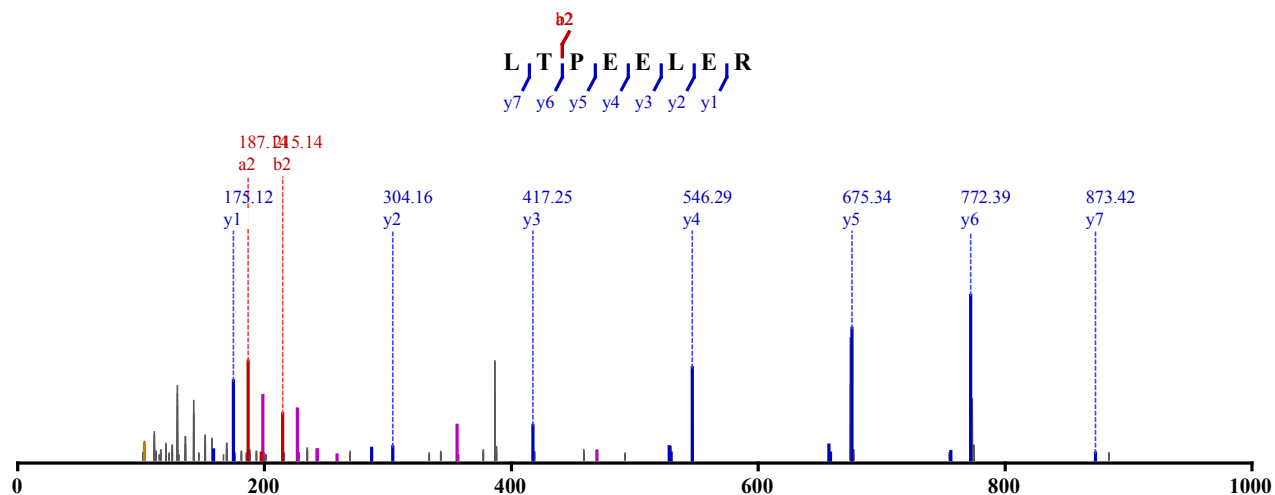

Not Modified  
Identified in MSS270 with qvalue 0.00  
Charge: 2, Exp. m/z: 493.762, Calc. m/z: 493.762  
Data File: HeLa\_ArgC-AspN\_HCD\_2, Scans: 17536 - 17536

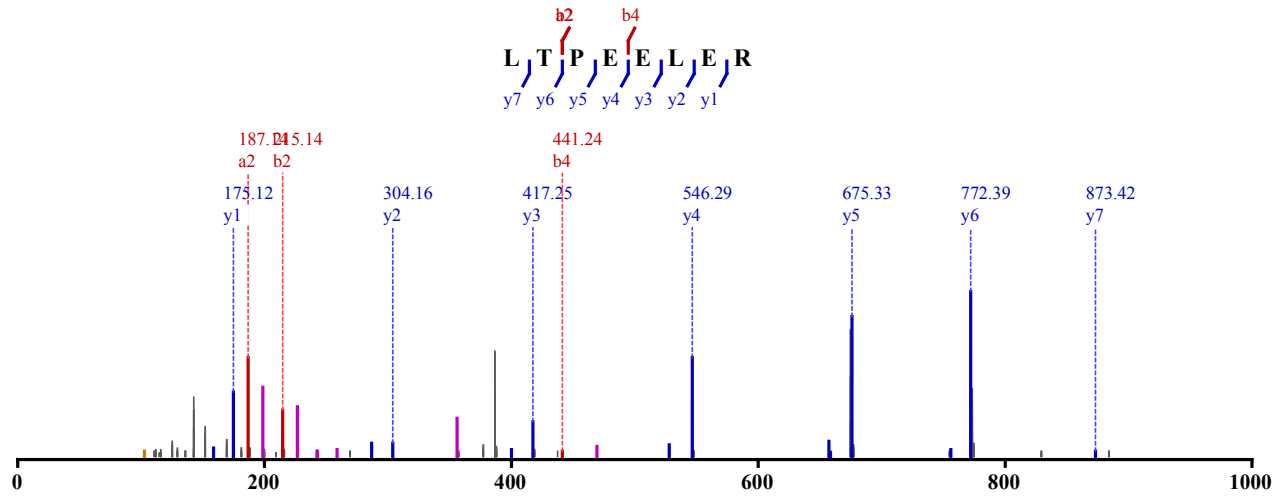

Not Modified  
Identified in MSS270 with qvalue 0.00  
Charge: 2, Exp. m/z: 493.762, Calc. m/z: 493.762  
Data File: HeLa\_ArgC-AspN\_HCD\_2, Scans: 17641 - 17641

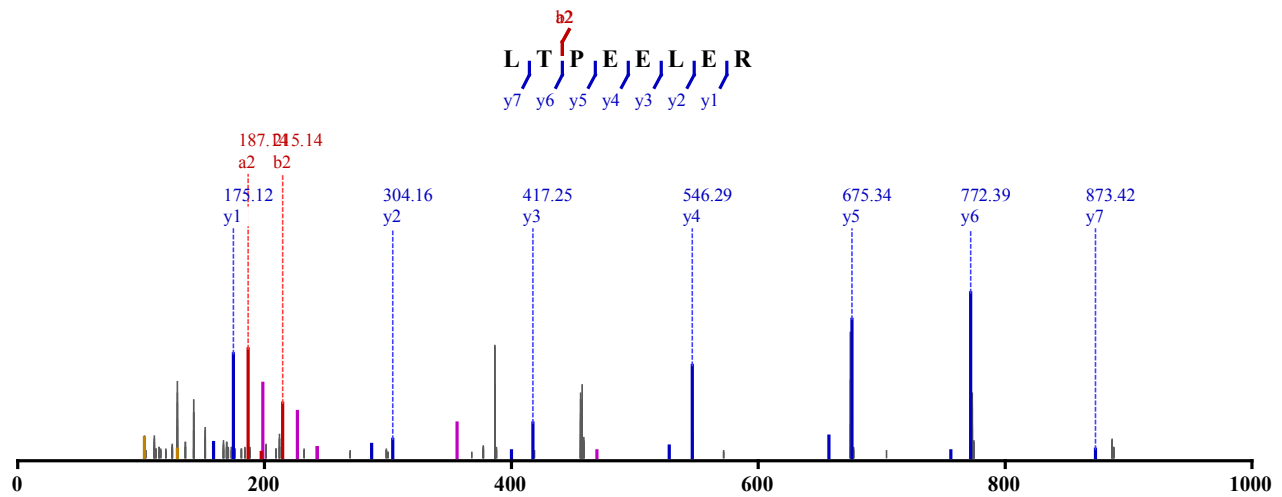

Not Modified  
Identified in MSS270 with qvalue 0.00  
Charge: 2, Exp. m/z: 493.761, Calc. m/z: 493.762  
Data File: HeLa\_ArgC-AspN\_HCD\_3, Scans: 14381 - 14381

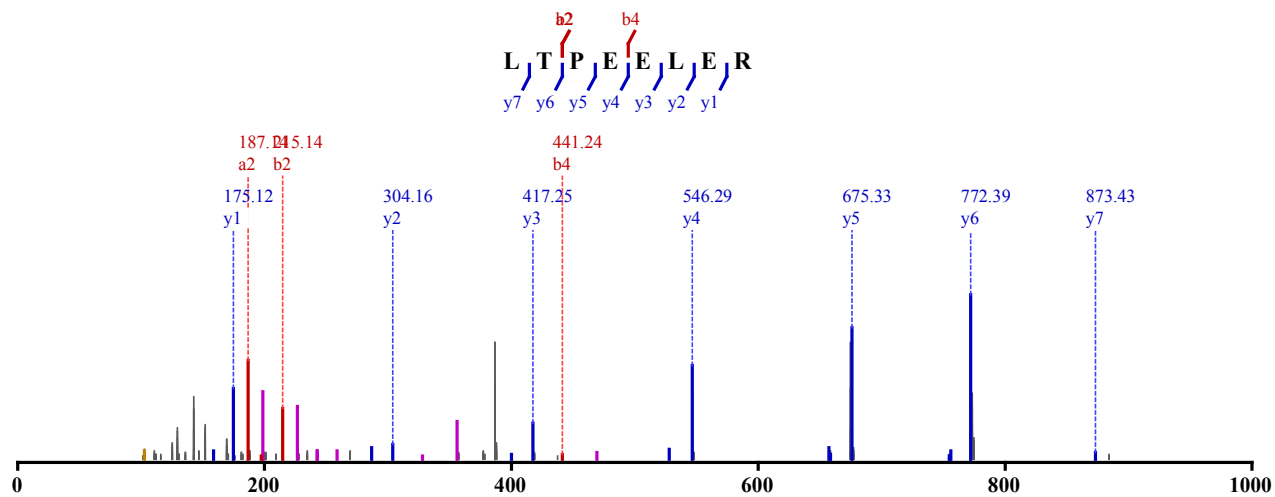

Not Modified

Identified in MSS275 with qvalue 0.00

Charge: 2, Exp. m/z: 493.761, Calc. m/z: 493.762

Data File: HeLa\_ArgC-LysC\_HCD\_1, Scans: 18385 - 18385

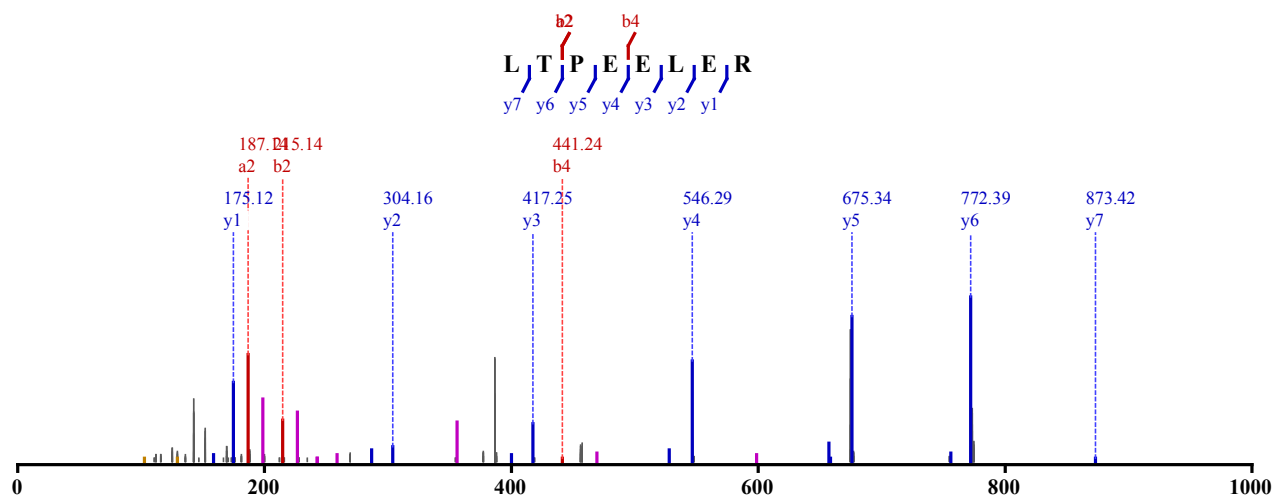

Not Modified

Identified in MSS275 with qvalue 0.00

Charge: 2, Exp. m/z: 493.761, Calc. m/z: 493.762

Data File: HeLa\_ArgC-LysC\_HCD\_1, Scans: 18253 - 18253

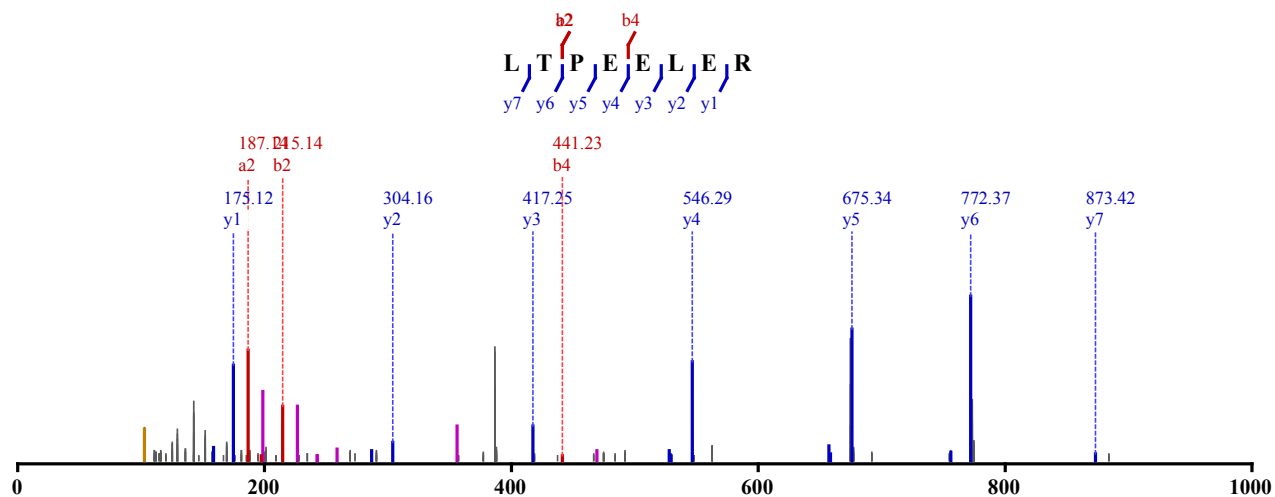

Not Modified

Identified in MSS275 with qvalue 0.00

Charge: 2, Exp. m/z: 493.761, Calc. m/z: 493.762



Data File: HeLa\_ArgC-LysC\_HCD\_2, Scans: 18908 - 18908

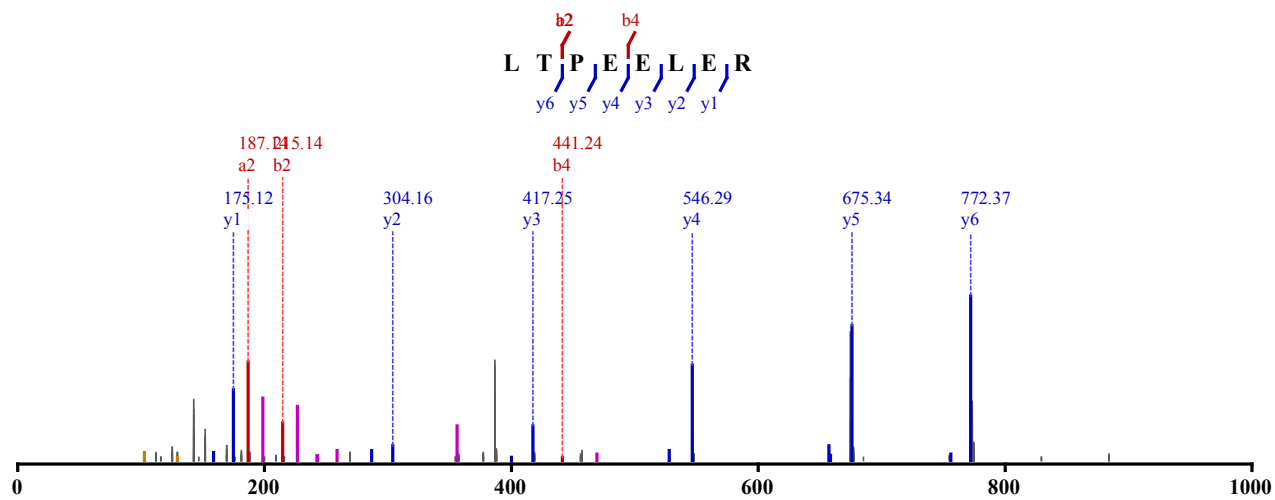

Not Modified

Identified in MSS275 with qvalue 0.00

Charge: 2, Exp. m/z: 493.761, Calc. m/z: 493.762

Data File: HeLa\_ArgC-LysC\_HCD\_2, Scans: 18779 - 18779

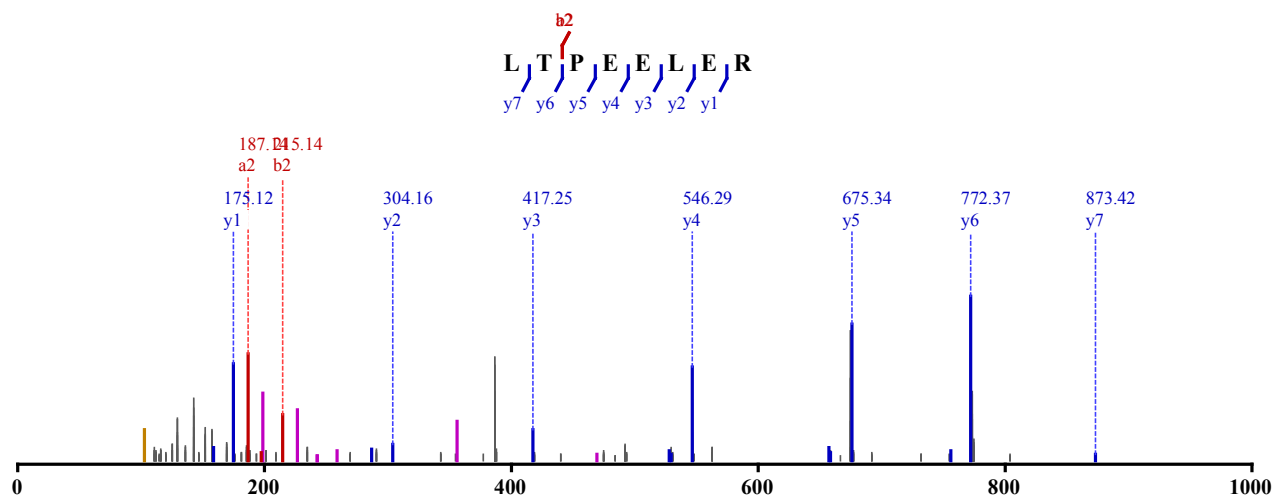

Not Modified

Identified in MSS271 with qvalue 0.00

Charge: 2, Exp. m/z: 493.762, Calc. m/z: 493.762

Data File: HeLa\_ArgC-Chytry\_HCD\_1, Scans: 18385 - 18385

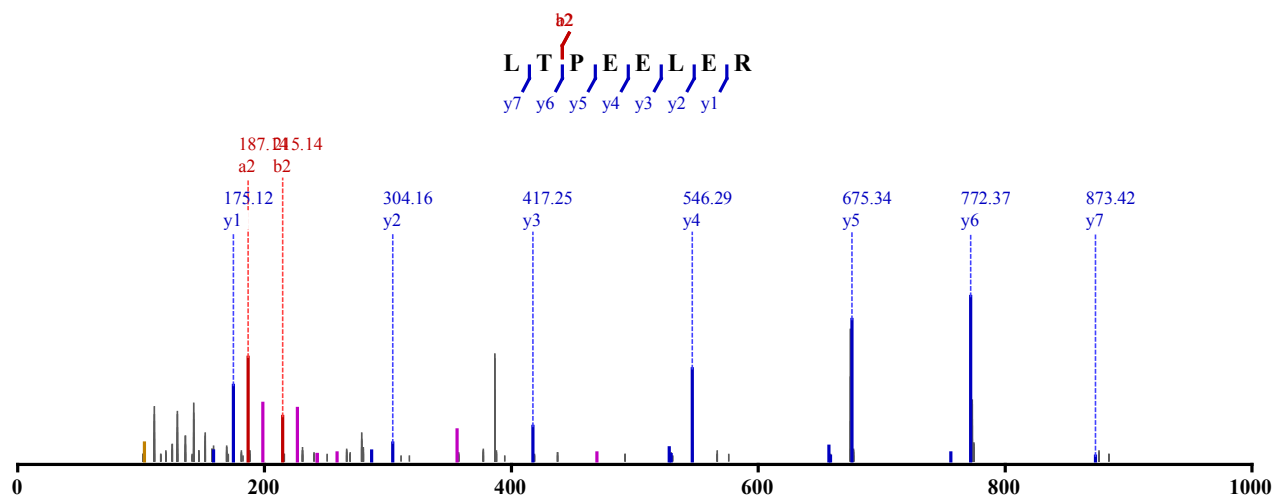

Not Modified

Identified in MSS271 with qvalue 0.00  
 Charge: 2, Exp. m/z: 493.761, Calc. m/z: 493.762  
 Data File: HeLa\_ArgC-Chytry\_HCD\_2, Scans: 18602 - 18602

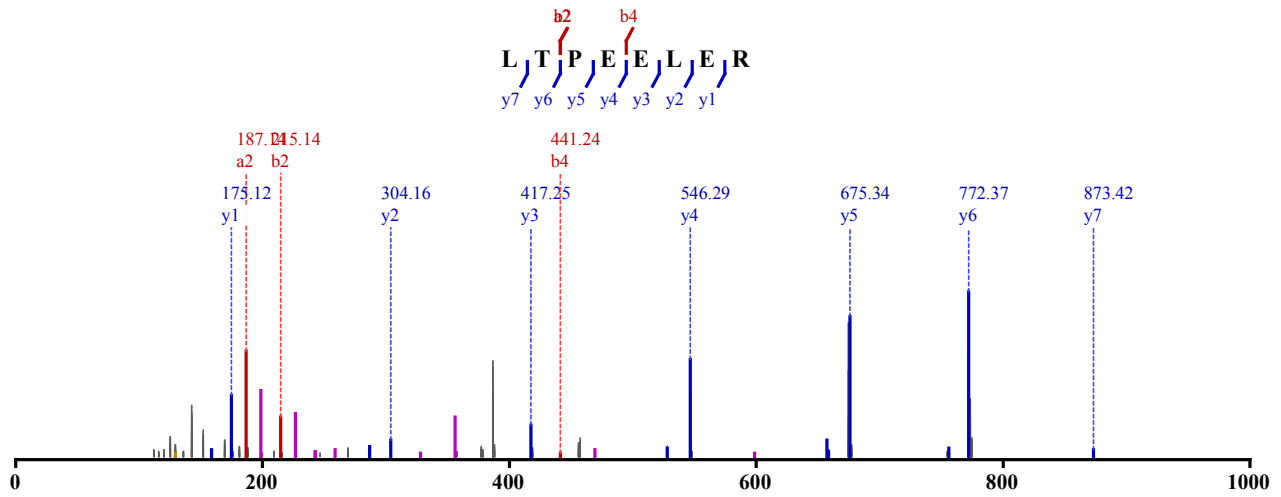

Not Modified  
 Identified in MSS271 with qvalue 0.00  
 Charge: 2, Exp. m/z: 493.762, Calc. m/z: 493.762  
 Data File: HeLa\_ArgC-Chytry\_HCD\_2, Scans: 18489 - 18489

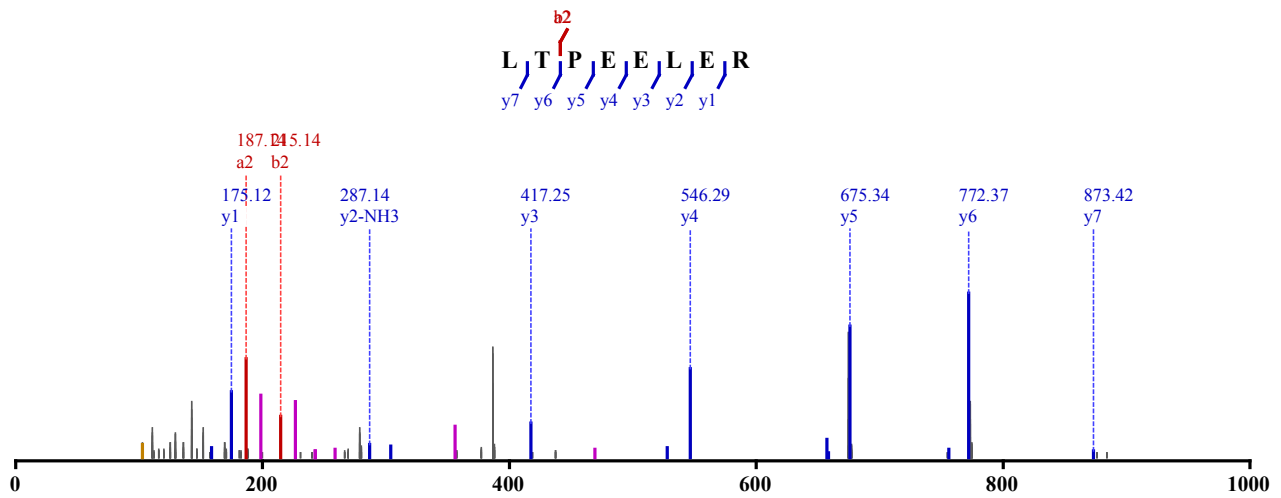

Not Modified  
 Identified in MSS271 with qvalue 0.00  
 Charge: 2, Exp. m/z: 493.762, Calc. m/z: 493.762  
 Data File: HeLa\_ArgC-Chytry\_HCD\_3, Scans: 15160 - 15160

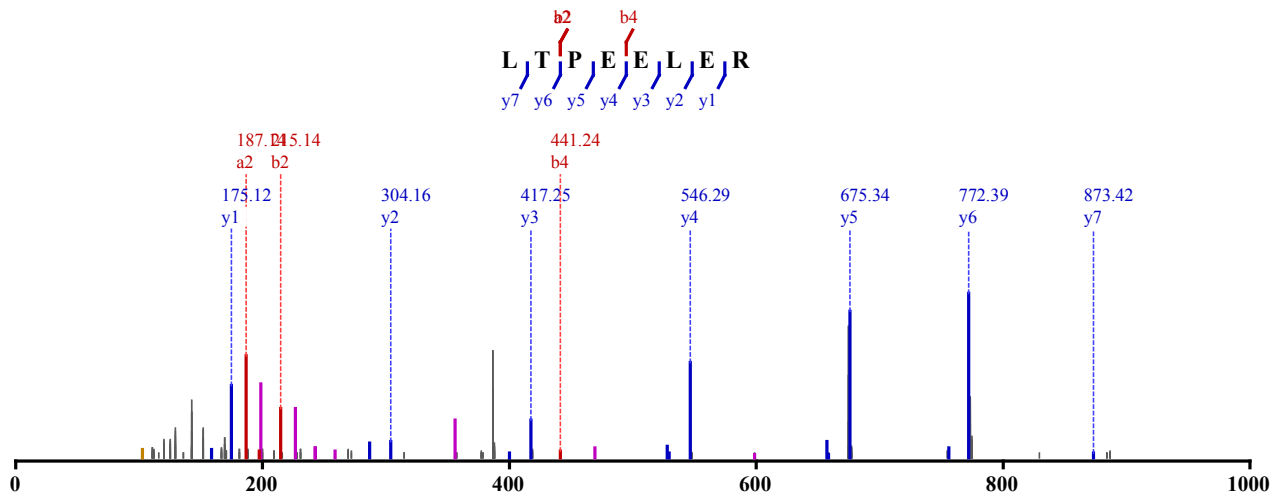

Not Modified

Identified in MSS295 with qvalue 0.01

Charge: 2, Exp. m/z: 493.762, Calc. m/z: 493.762

Data File: HeLa\_ArgC\_CID-ETD\_2, Scans: 9425 - 9425

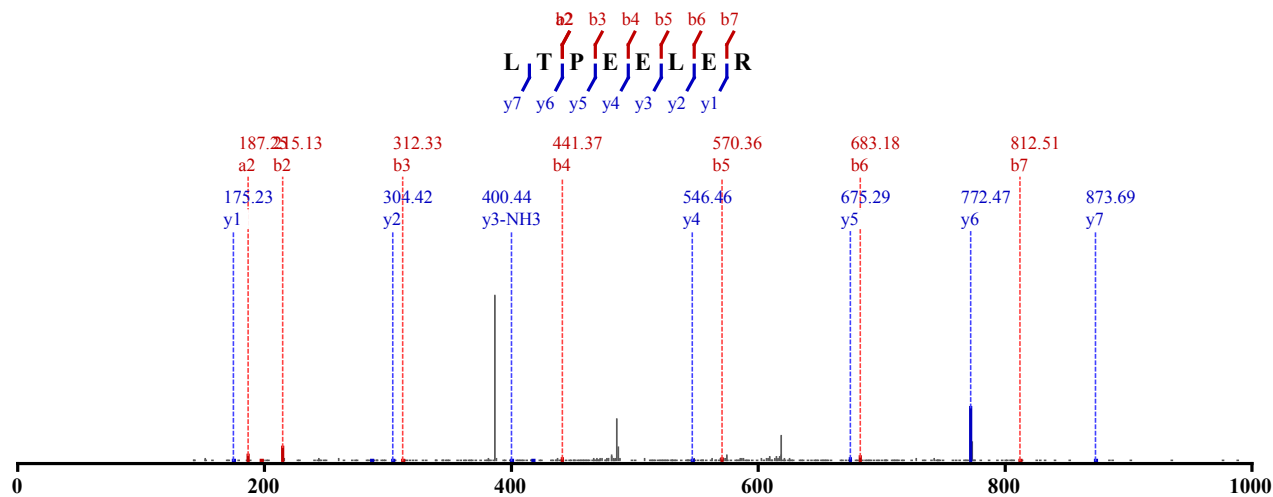

Not Modified

Identified in MSS295 with qvalue 0.01

Charge: 2, Exp. m/z: 493.762, Calc. m/z: 493.762

Data File: HeLa\_ArgC\_CID-ETD\_2, Scans: 9494 - 9494

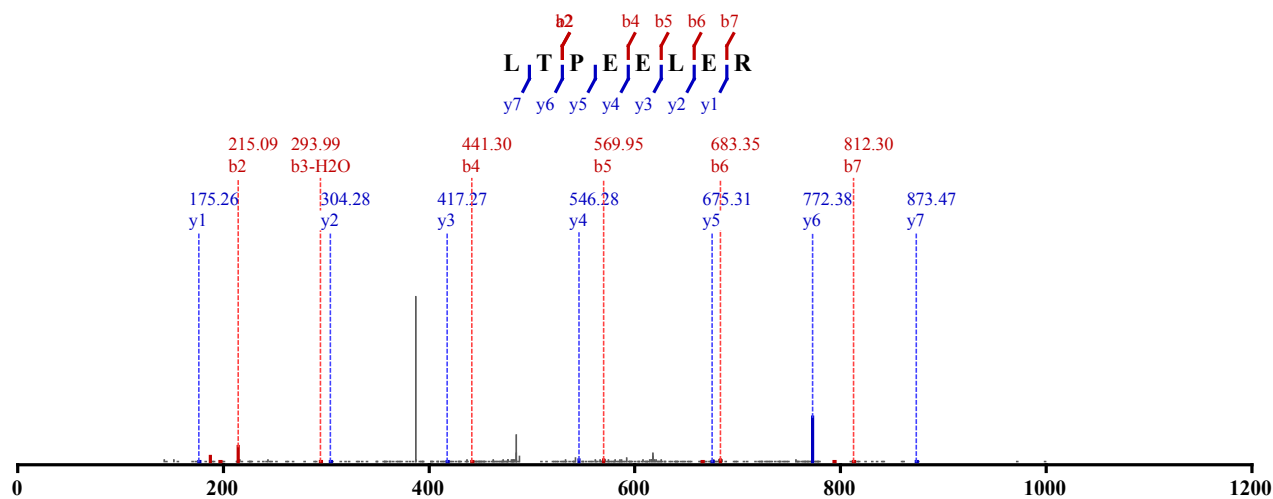

Not Modified

Identified in MSS301 with qvalue 0.00

Charge: 2, Exp. m/z: 493.761, Calc. m/z: 493.762

Data File: HeLa\_ArgC-Try\_HCD\_1, Scans: 18330 - 18330

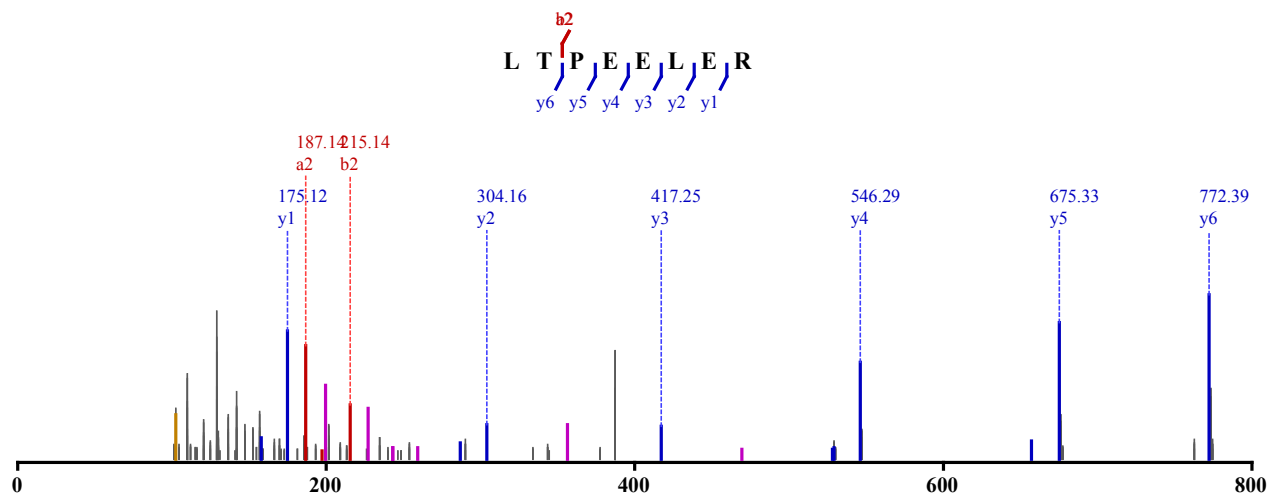

Not Modified

Identified in MSS301 with qvalue 0.00

Charge: 2, Exp. m/z: 493.761, Calc. m/z: 493.762

Data File: HeLa\_ArgC-Try\_HCD\_1, Scans: 18447 - 18447

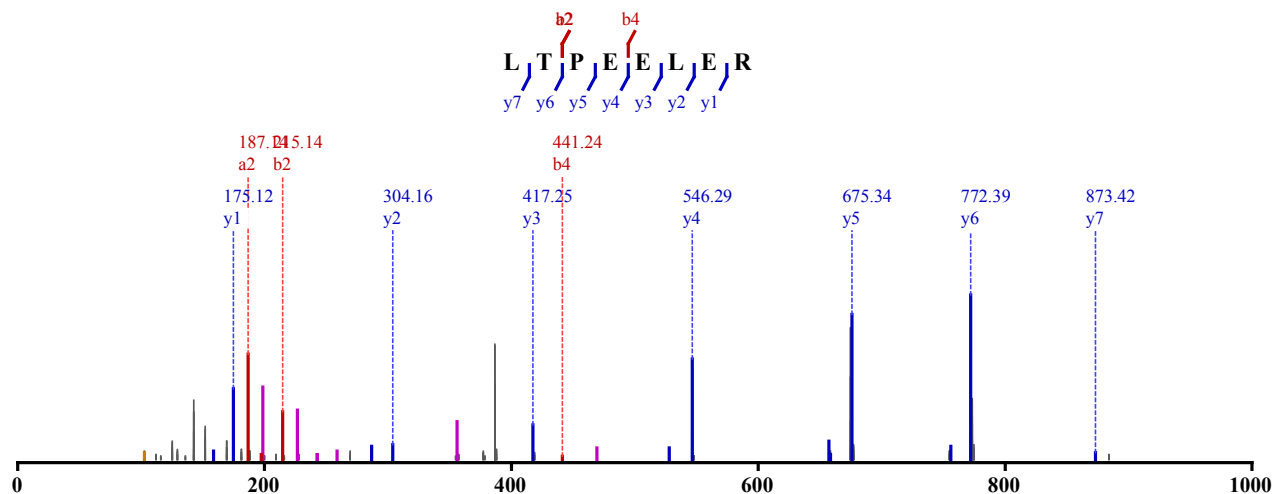

Not Modified

Identified in MSS301 with qvalue 0.00

Charge: 2, Exp. m/z: 493.761, Calc. m/z: 493.762

Data File: HeLa\_ArgC-Try\_HCD\_2, Scans: 19007 - 19007

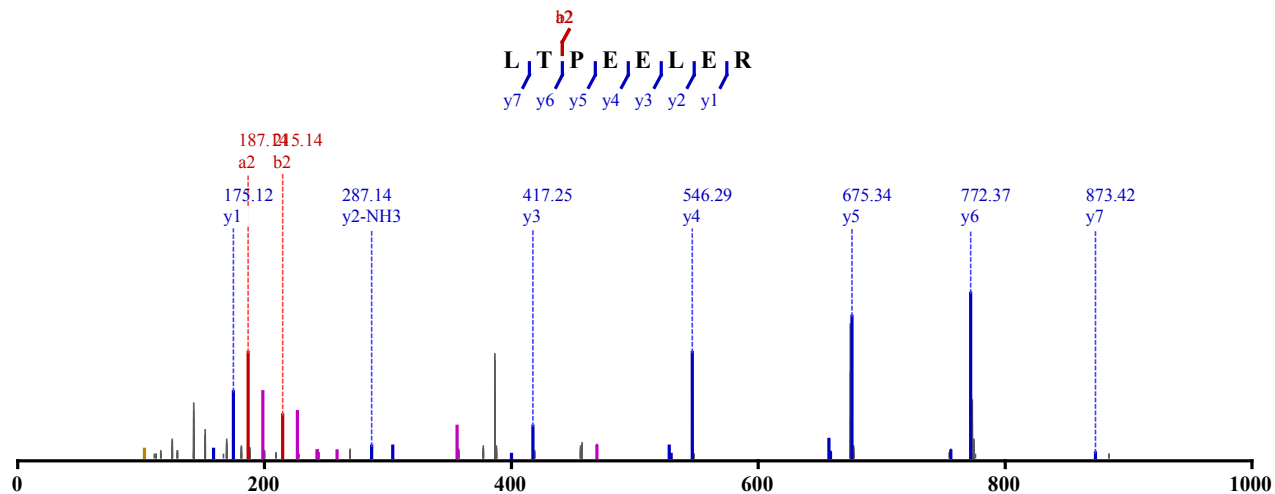

Not Modified

Identified in MSS301 with qvalue 0.00

Charge: 2, Exp. m/z: 493.762, Calc. m/z: 493.762

Data File: HeLa\_ArgC-Try\_HCD\_2, Scans: 18886 - 18886

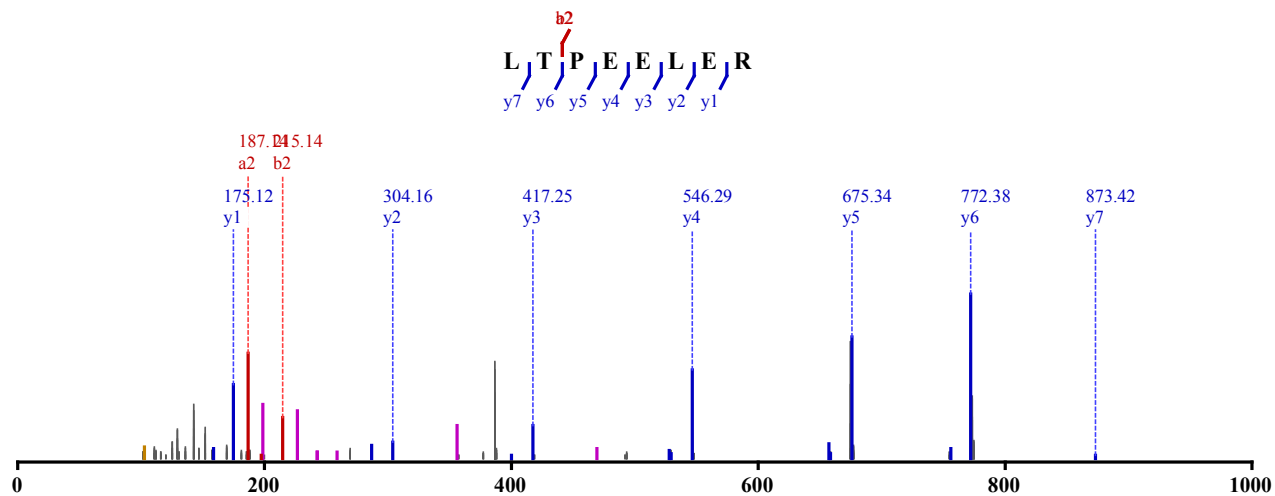

Not Modified

Identified in MSS301 with qvalue 0.00

Charge: 2, Exp. m/z: 493.761, Calc. m/z: 493.762

Data File: HeLa\_ArgC-Try\_HCD\_3, Scans: 16046 - 16046

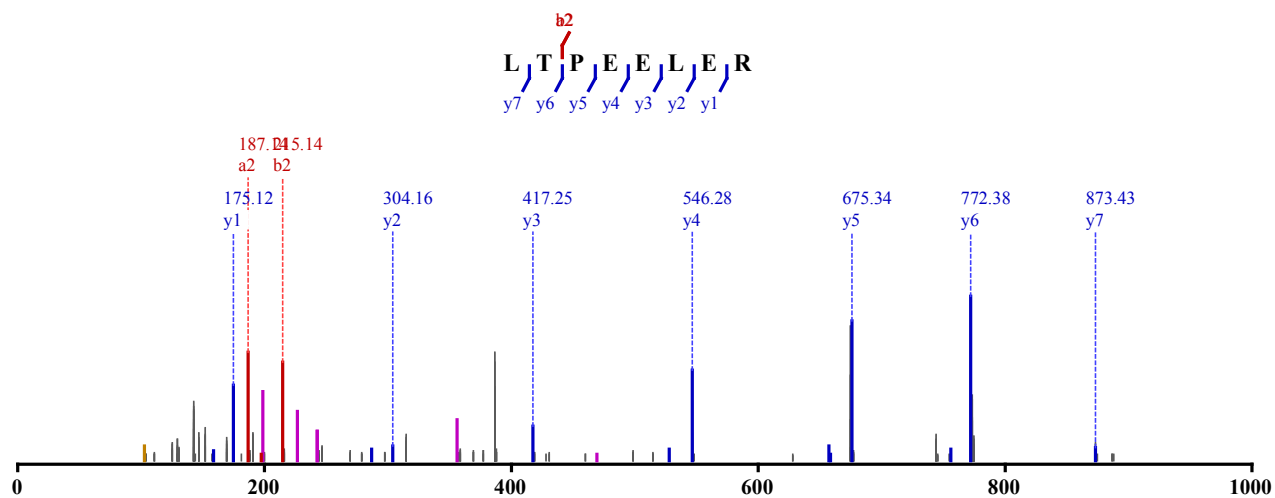

Not Modified

Identified in MSS305 with qvalue 0.00

Charge: 2, Exp. m/z: 493.762, Calc. m/z: 493.762

Data File: HeLa\_ArgC-Elastase\_HCD\_1, Scans: 19439 - 19439

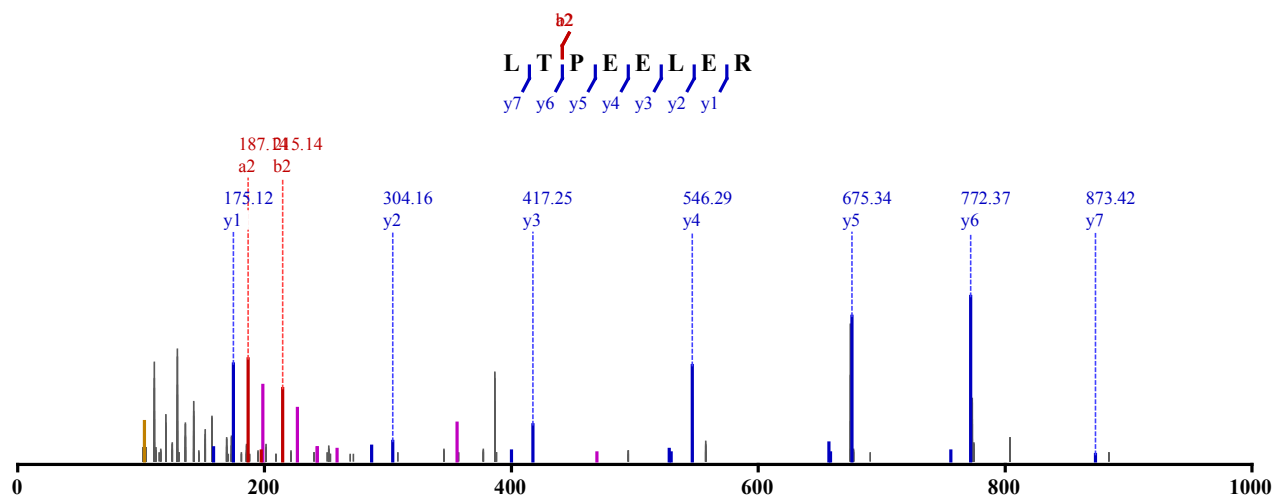

Not Modified

Identified in MSS305 with qvalue 0.00  
Charge: 2, Exp. m/z: 493.761, Calc. m/z: 493.762  
Data File: HeLa\_ArgC-Elastase\_HCD\_1, Scans: 19566 - 19566

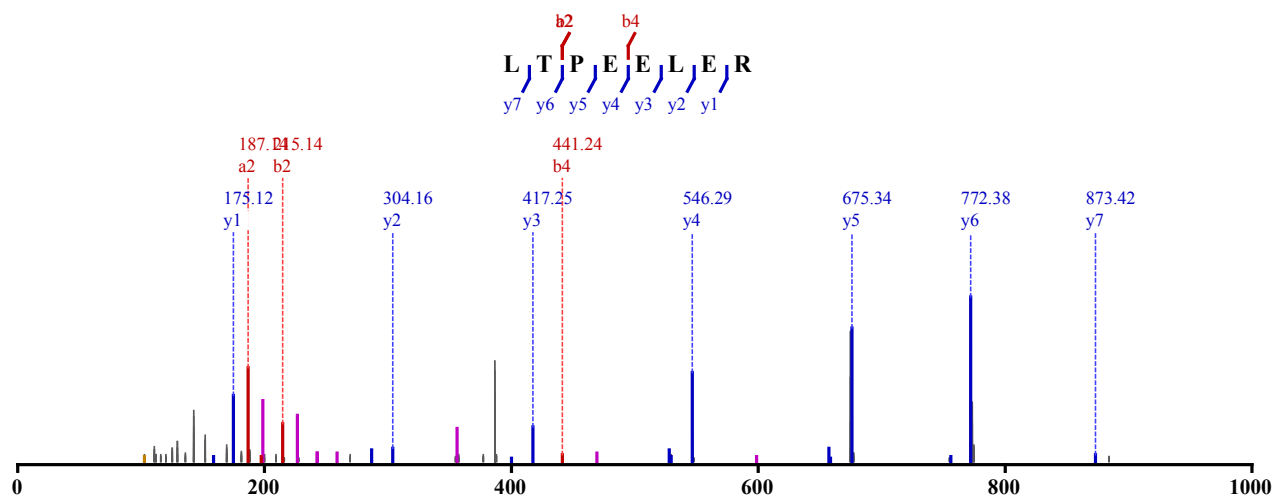

Not Modified  
Identified in MSS305 with qvalue 0.00  
Charge: 2, Exp. m/z: 493.761, Calc. m/z: 493.762  
Data File: HeLa\_ArgC-Elastase\_HCD\_2, Scans: 19693 - 19693

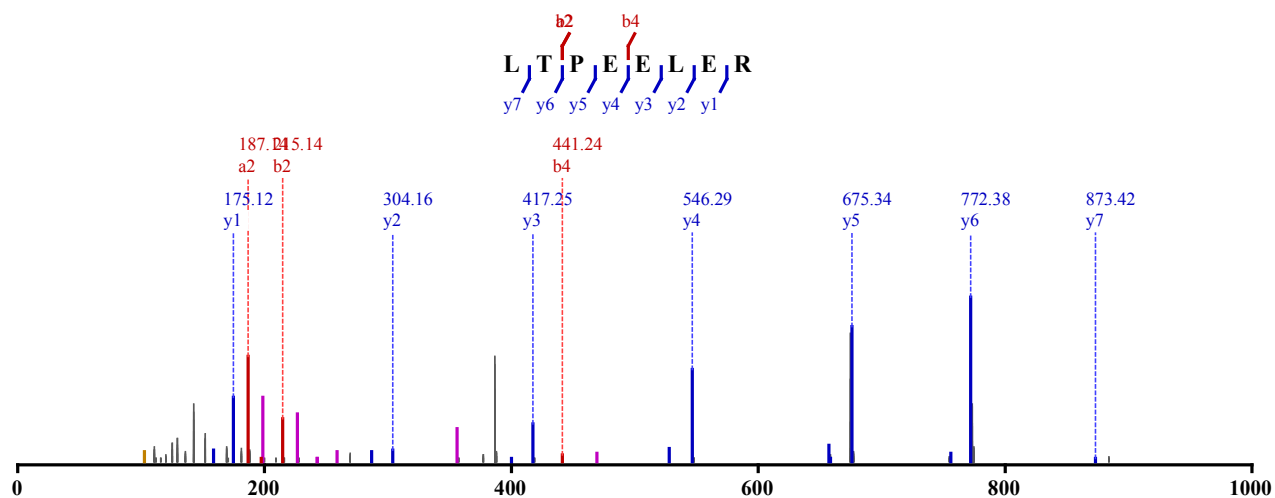

Not Modified  
Identified in MSS305 with qvalue 0.00  
Charge: 2, Exp. m/z: 493.761, Calc. m/z: 493.762  
Data File: HeLa\_ArgC-Elastase\_HCD\_2, Scans: 19556 - 19556

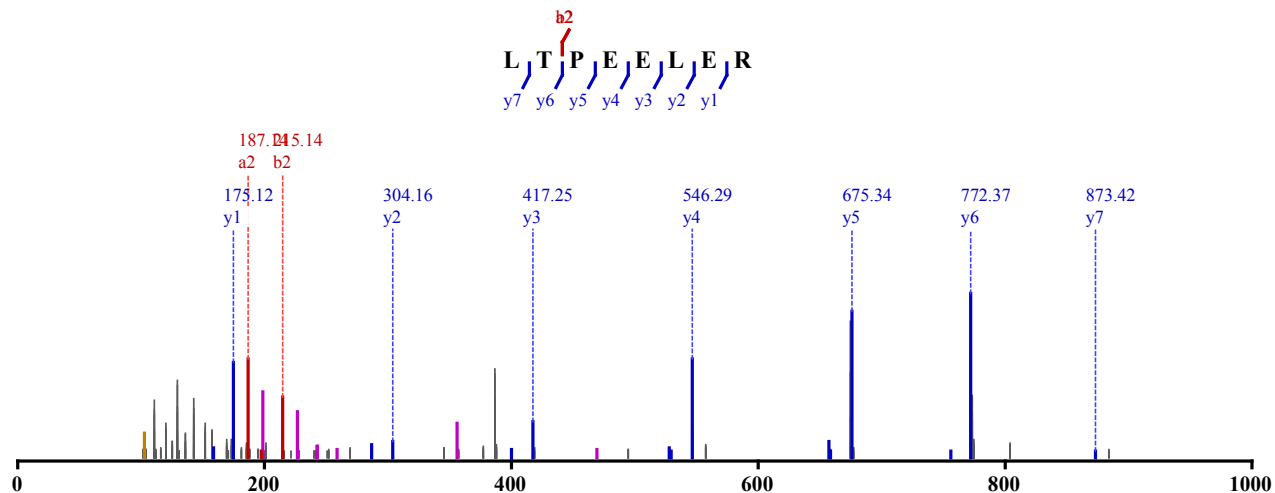

Not Modified  
 Identified in MSS305 with qvalue 0.00  
 Charge: 2, Exp. m/z: 493.762, Calc. m/z: 493.762  
 Data File: HeLa\_ArgC-Elastase\_HCD\_3, Scans: 15735 - 15735

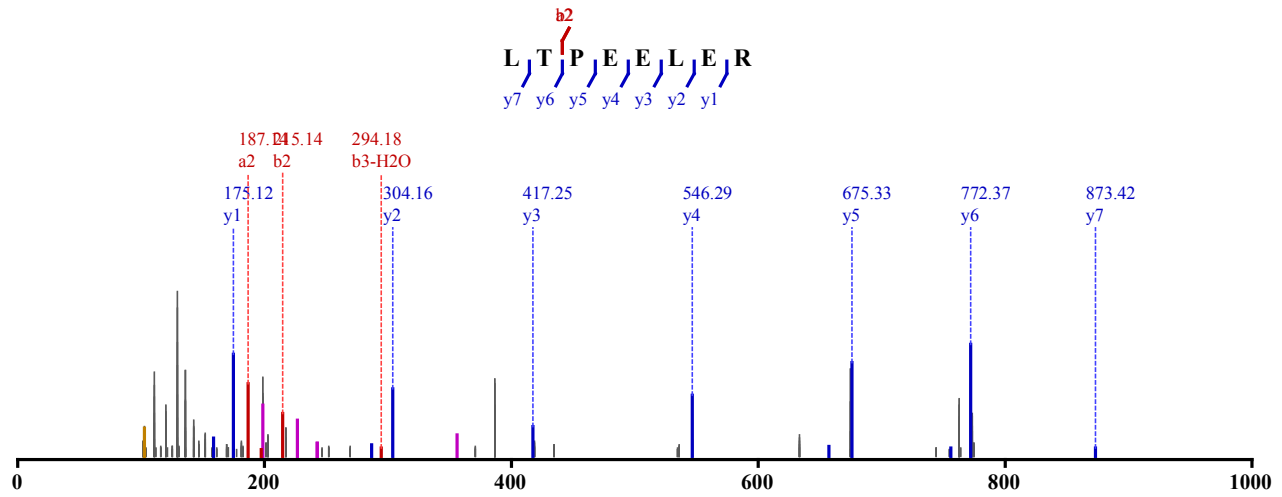

Not Modified  
 Identified in MSS396 with qvalue 0.00  
 Charge: 2, Exp. m/z: 493.761, Calc. m/z: 493.762  
 Data File: HeLa\_ACT\_HCD\_1, Scans: 13078 - 13078

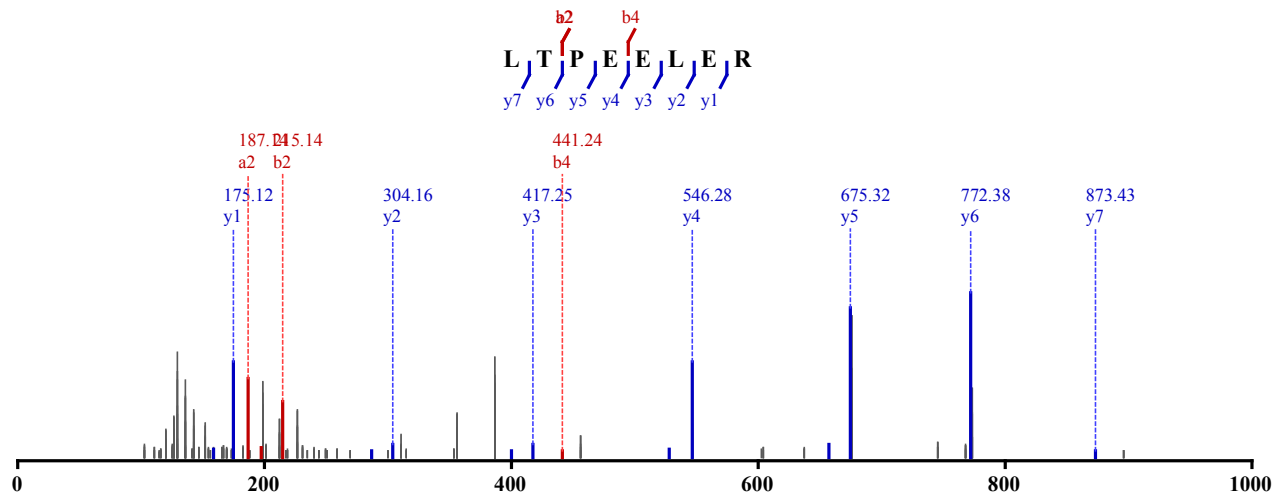

Not Modified  
 Identified in MSS404 with qvalue 0.01  
 Charge: 2, Exp. m/z: 493.760, Calc. m/z: 493.762  
 Data File: HeLa\_ALT\_HCD\_1, Scans: 14110 - 14110

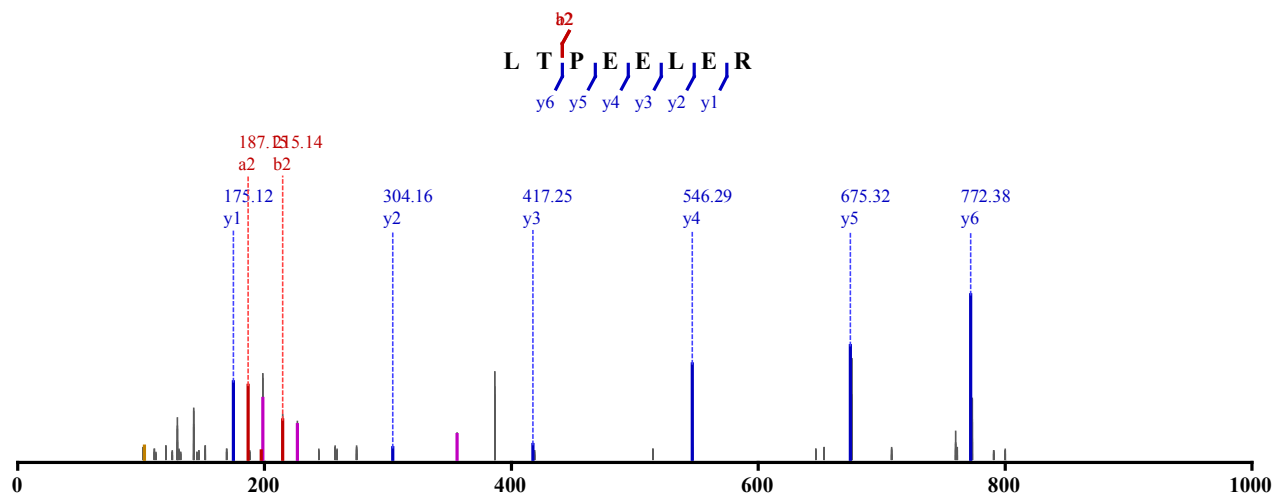

Not Modified

Identified in MSS405 with qvalue 0.00

Charge: 2, Exp. m/z: 493.762, Calc. m/z: 493.762

Data File: HeLa\_CET\_HCD\_1, Scans: 15081 - 15081

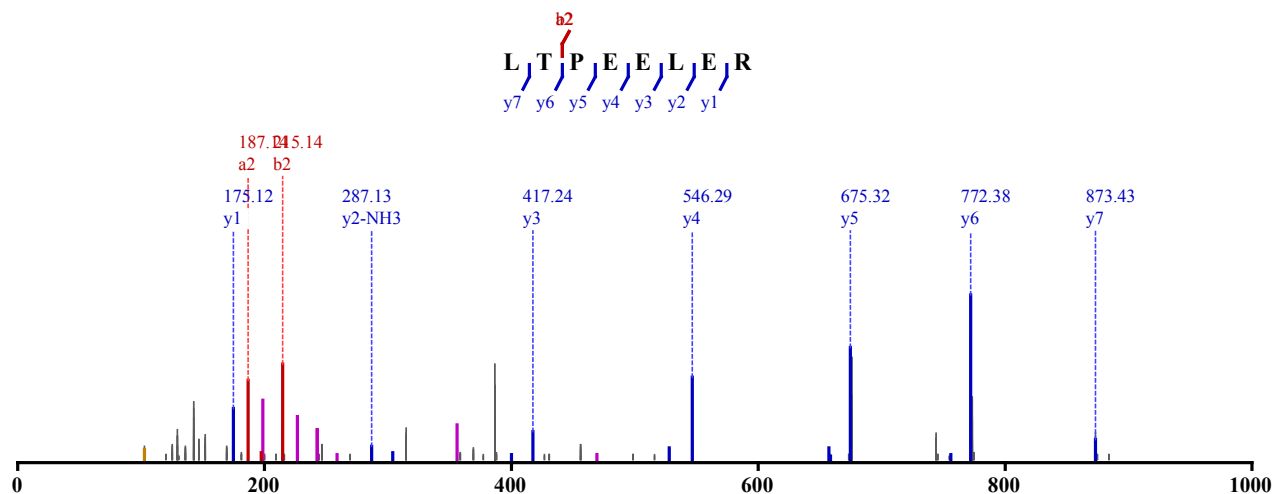

Not Modified

Identified in MSS408 with qvalue 0.00

Charge: 2, Exp. m/z: 493.761, Calc. m/z: 493.762

Data File: HeLa\_GET\_HCD\_1, Scans: 14816 - 14816

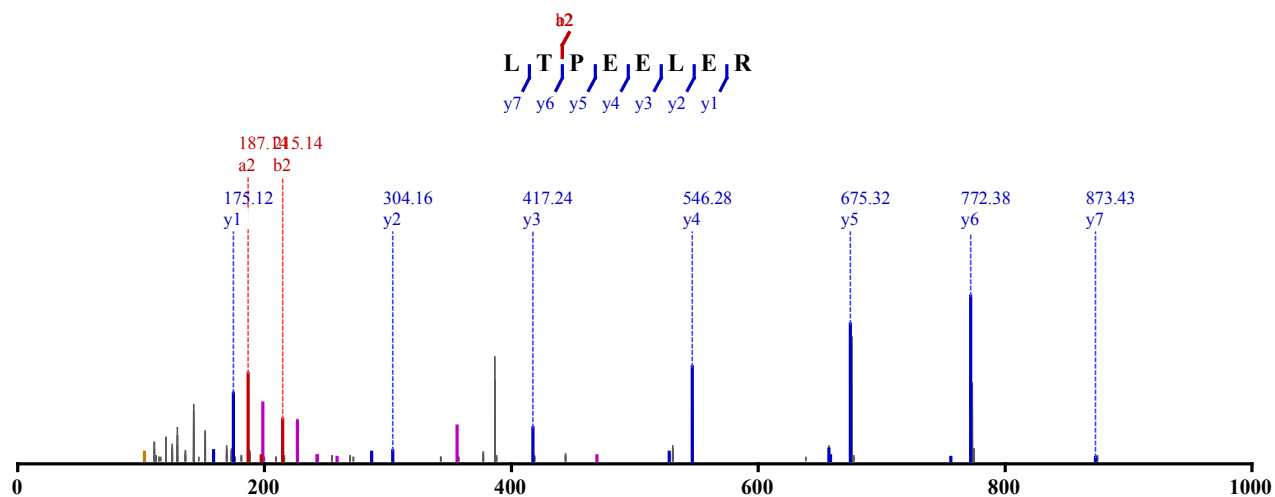

Not Modified

Identified in MSS414 with qvalue 0.00

Charge: 2, Exp. m/z: 493.761, Calc. m/z: 493.762



Data File: HeLa\_LET\_HCD\_1, Scans: 14604 - 14604

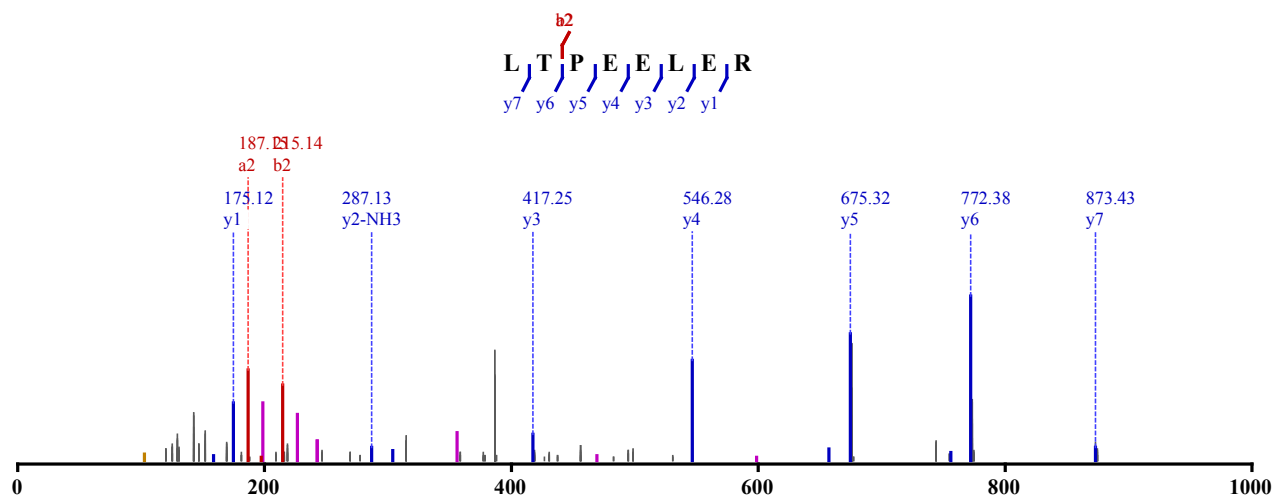

Not Modified

Identified in MSS419 with qvalue 0.00

Charge: 2, Exp. m/z: 493.762, Calc. m/z: 493.762

Data File: HeLa\_ArgC-LysC\_CID-ETD\_1, Scans: 10773 - 10773

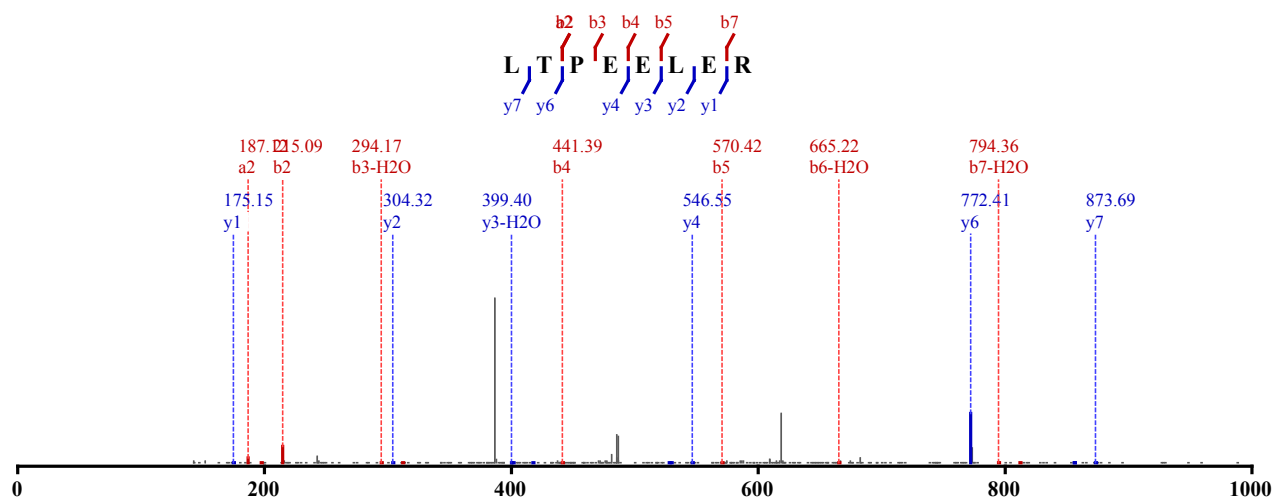

Not Modified

Identified in MSS420 with qvalue 0.00

Charge: 2, Exp. m/z: 493.762, Calc. m/z: 493.762

Data File: HeLa\_ArgC-Try\_CID-ETD\_1, Scans: 10368 - 10368

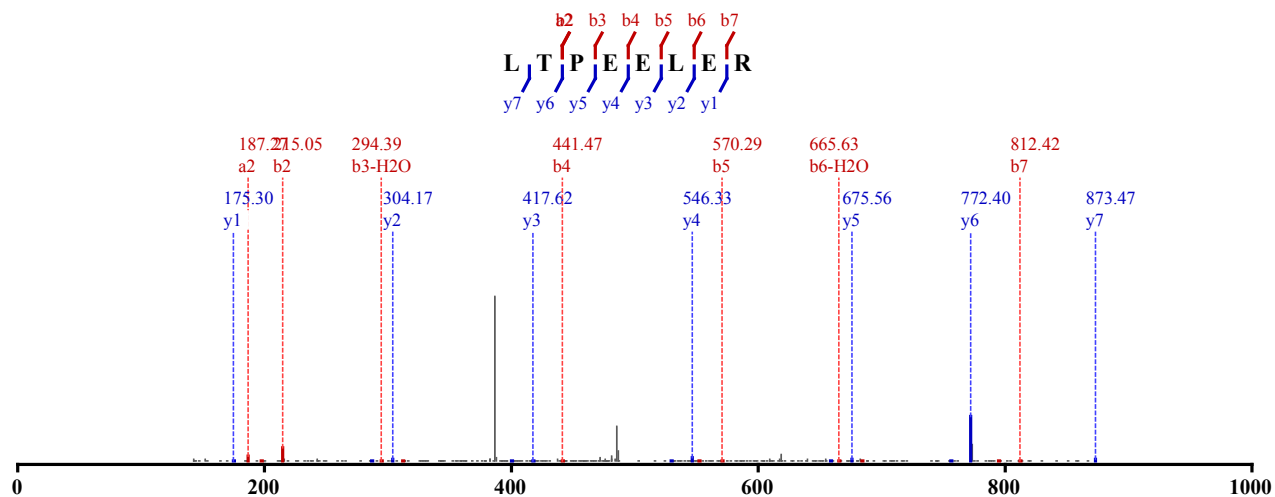

Not Modified

Identified in MSS434 with qvalue 0.00  
 Charge: 2, Exp. m/z: 493.762, Calc. m/z: 493.762  
 Data File: HeLa\_LysC-try\_CID-ETD\_1, Scans: 13169 - 13169

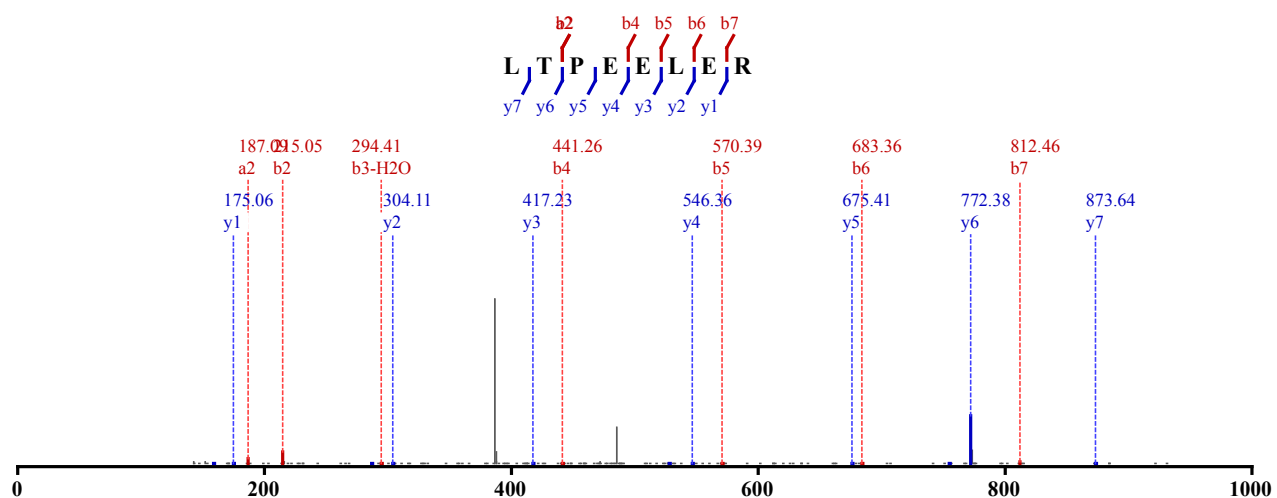

Not Modified  
 Identified in MSS434 with qvalue 0.00  
 Charge: 2, Exp. m/z: 493.762, Calc. m/z: 493.762  
 Data File: HeLa\_LysC-try\_CID-ETD\_2, Scans: 12219 - 12219

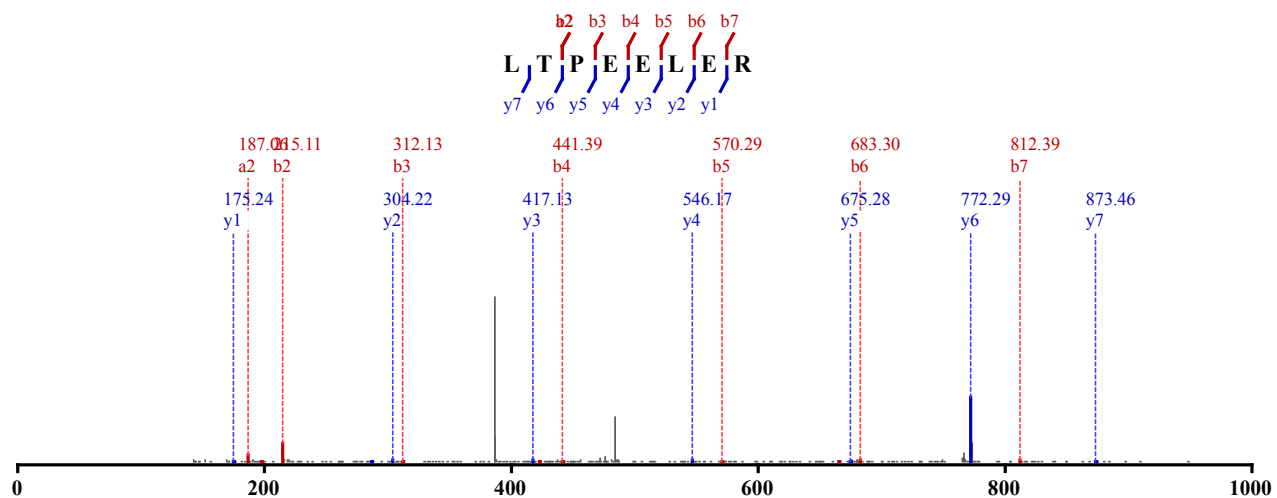

Not Modified  
 Identified in MSS480 with qvalue 0.01  
 Charge: 2, Exp. m/z: 493.762, Calc. m/z: 493.762  
 Data File: HeLa\_try\_pH11\_CID\_3xload\_2, Scans: 24811 - 24811

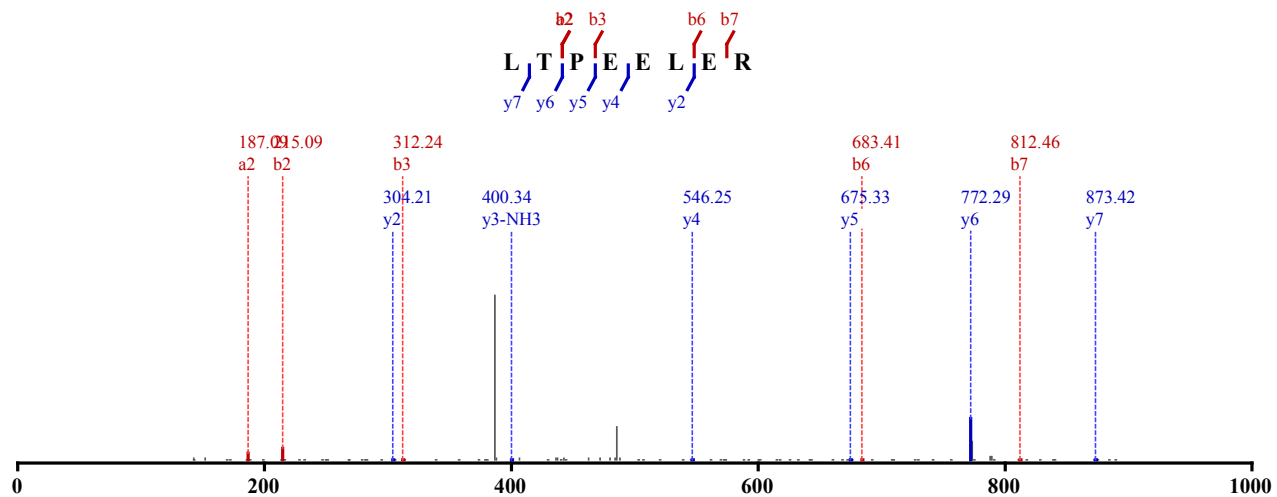

Not Modified  
 Identified in MSS480 with qvalue 0.00  
 Charge: 2, Exp. m/z: 493.761, Calc. m/z: 493.762  
 Data File: HeLa\_try\_pH4\_CID\_3xload\_3, Scans: 10475 - 10475

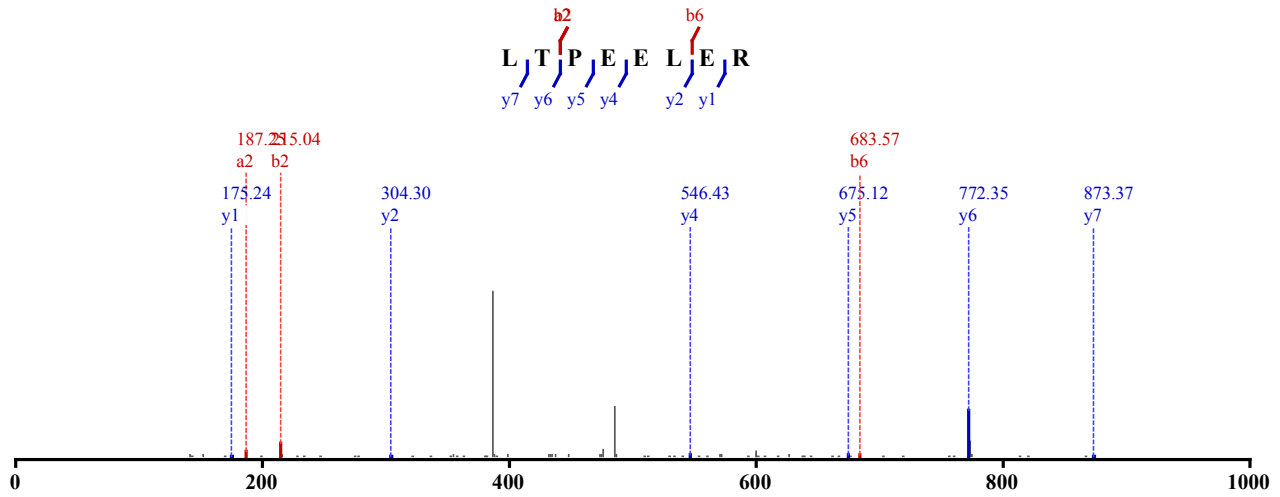

Not Modified  
 Identified in MSS480 with qvalue 0.00  
 Charge: 2, Exp. m/z: 493.761, Calc. m/z: 493.762  
 Data File: HeLa\_try\_pH4\_CID\_3xload, Scans: 11813 - 11813

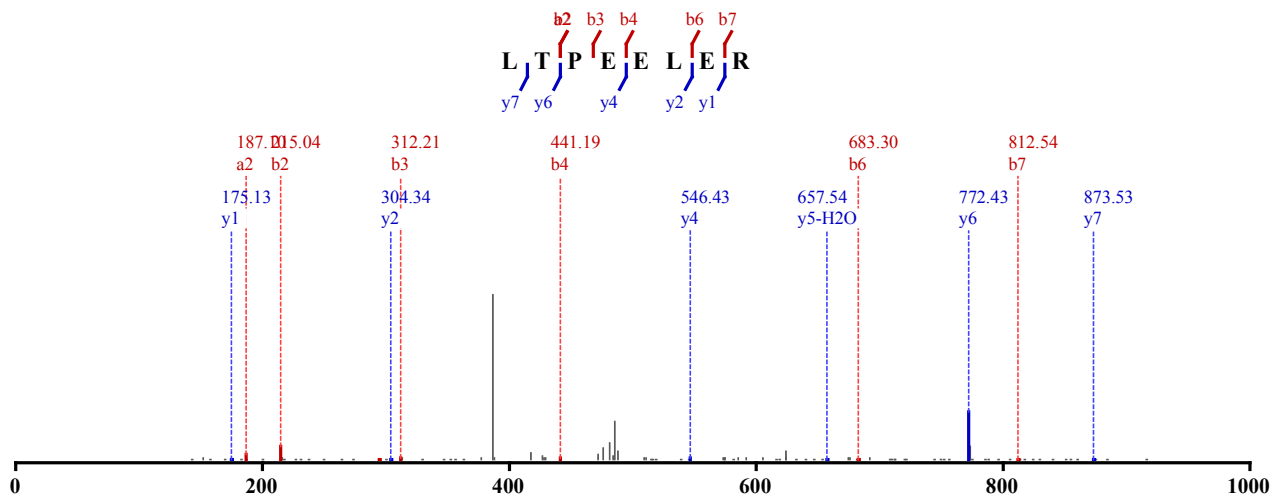

Not Modified  
 Identified in MSS480 with qvalue 0.01  
 Charge: 2, Exp. m/z: 493.761, Calc. m/z: 493.762  
 Data File: HeLa\_try\_pH4\_CID\_3xload, Scans: 11886 - 11886

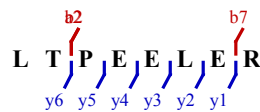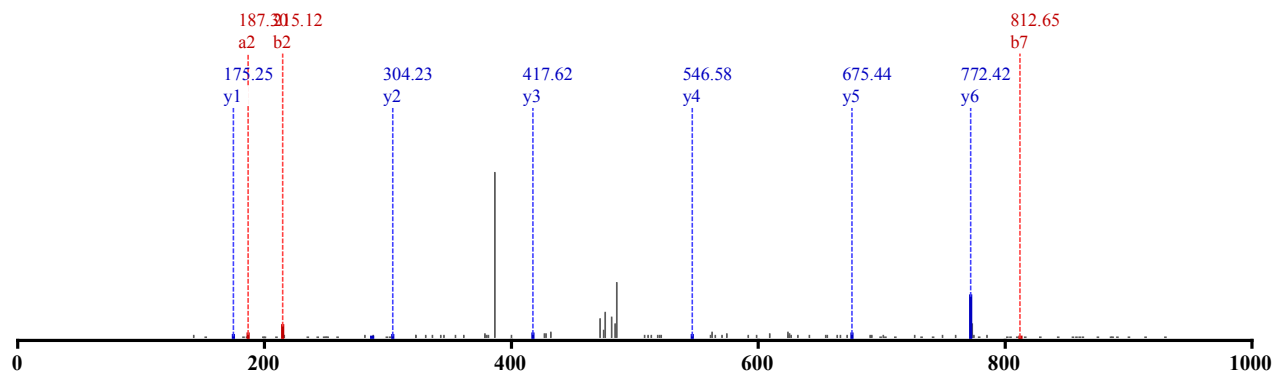

Not Modified

Identified in MSS480 with qvalue 0.00

Charge: 2, Exp. m/z: 493.760, Calc. m/z: 493.762

Data File: HeLa\_try\_pH6\_CID\_3xload\_2, Scans: 17422 - 17422

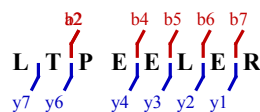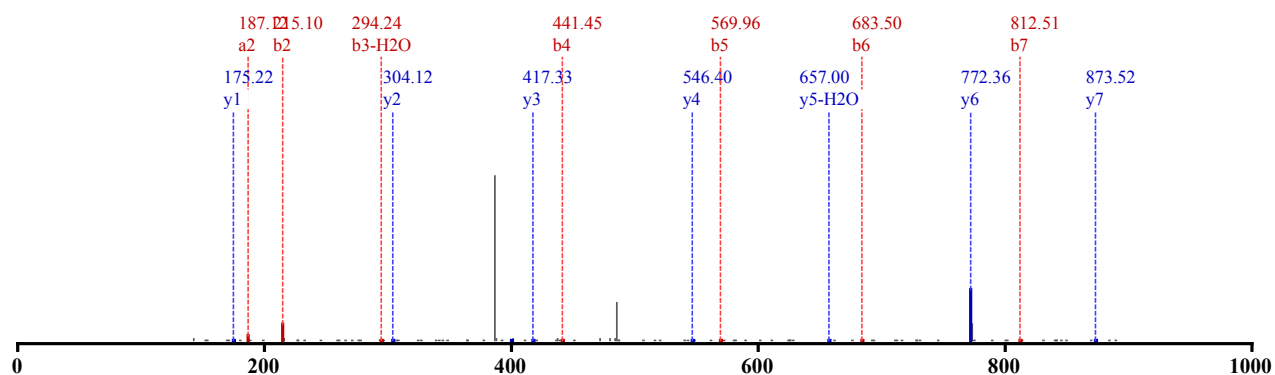

Not Modified

Identified in MSS480 with qvalue 0.00

Charge: 2, Exp. m/z: 493.761, Calc. m/z: 493.762

Data File: HeLa\_try\_pH6\_CID\_3xload\_3, Scans: 18509 - 18509

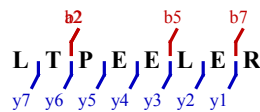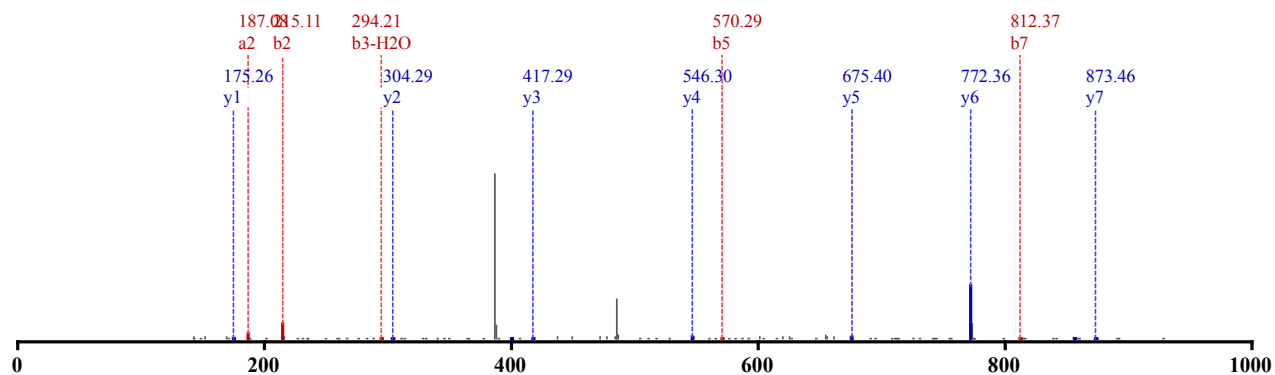

Not Modified

Identified in MSS480 with qvalue 0.00

Charge: 2, Exp. m/z: 493.761, Calc. m/z: 493.762

Data File: HeLa\_try\_pH6\_CID\_3xload\_3, Scans: 18592 - 18592

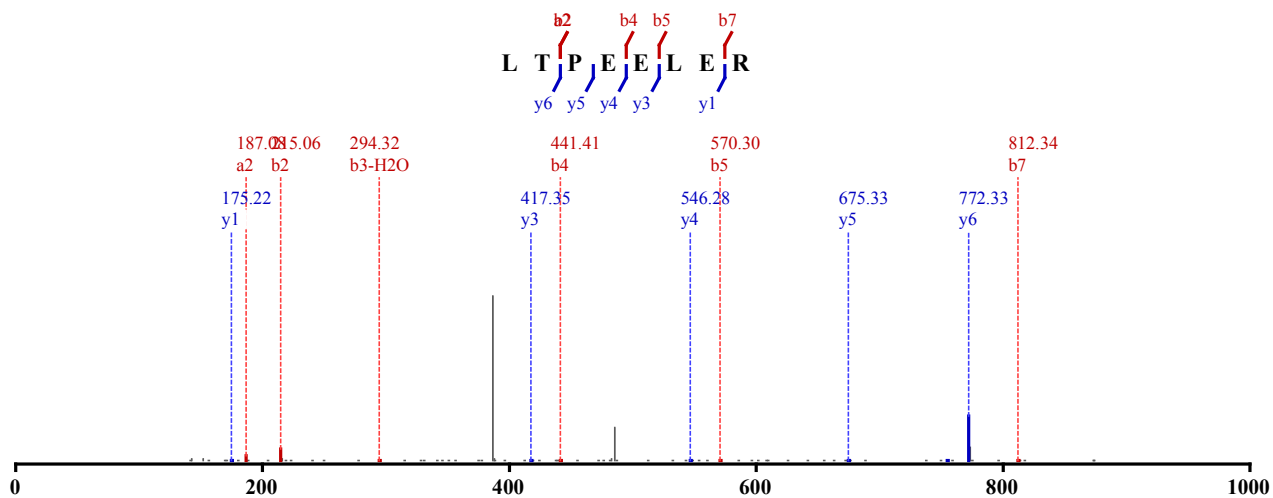

Not Modified

Identified in MSS480 with qvalue 0.00

Charge: 2, Exp. m/z: 493.761, Calc. m/z: 493.762

Data File: HeLa\_try\_pH6\_CID\_3xload\_3, Scans: 18676 - 18676

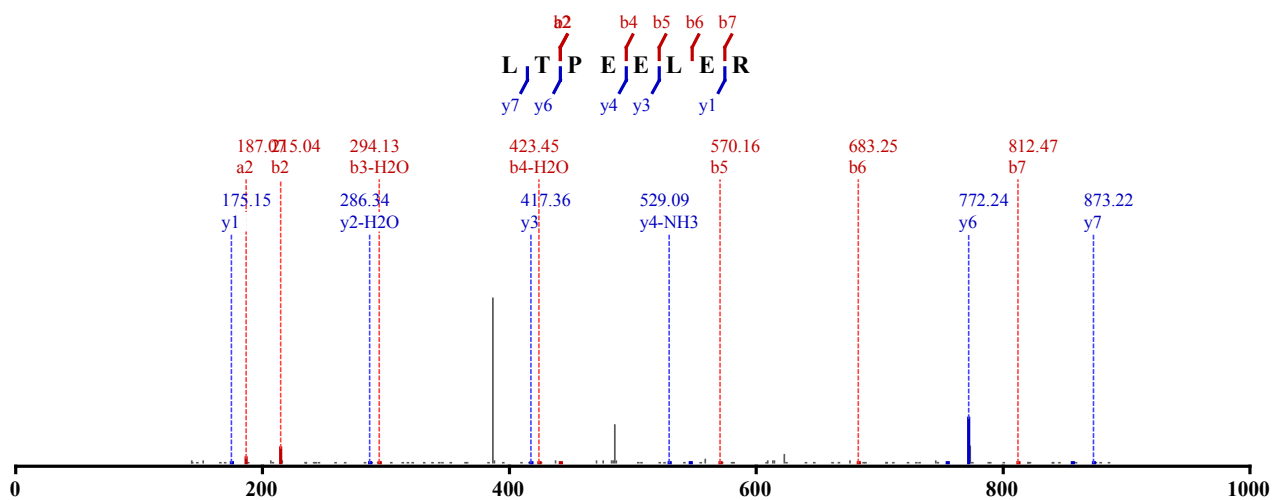

Not Modified

Identified in MSS480 with qvalue 0.00

Charge: 2, Exp. m/z: 493.761, Calc. m/z: 493.762

Data File: HeLa\_try\_pH6\_CID\_3xload, Scans: 15286 - 15286

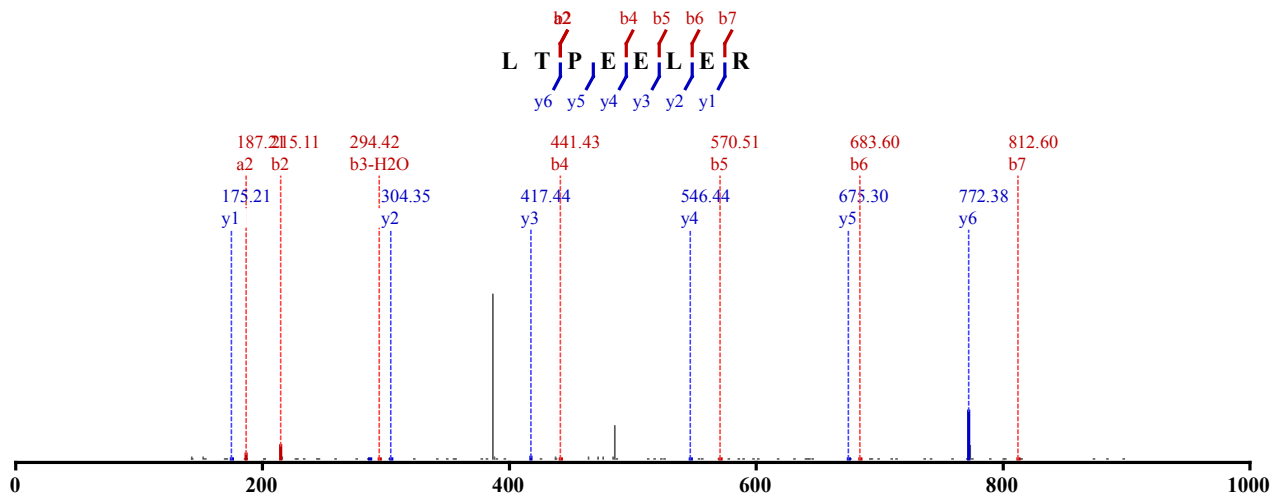

Not Modified

Identified in MSS480 with qvalue 0.00  
 Charge: 2, Exp. m/z: 493.762, Calc. m/z: 493.762  
 Data File: HeLa\_try\_pH8\_CID\_3xload\_2, Scans: 19297 - 19297

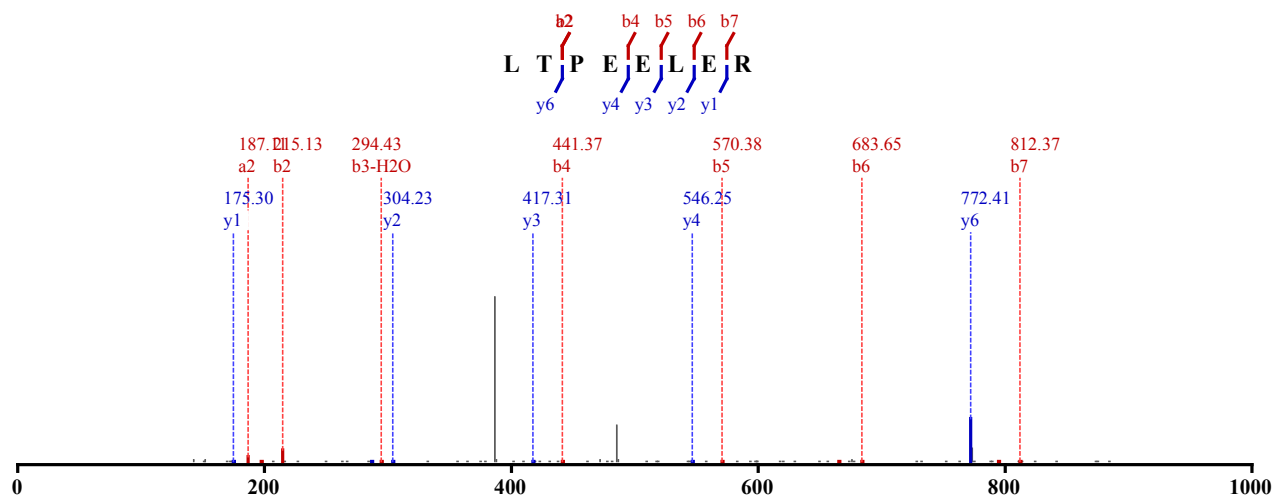

Not Modified  
 Identified in MSS480 with qvalue 0.00  
 Charge: 2, Exp. m/z: 493.761, Calc. m/z: 493.762  
 Data File: HeLa\_try\_pH8\_CID\_3xload\_3, Scans: 22419 - 22419

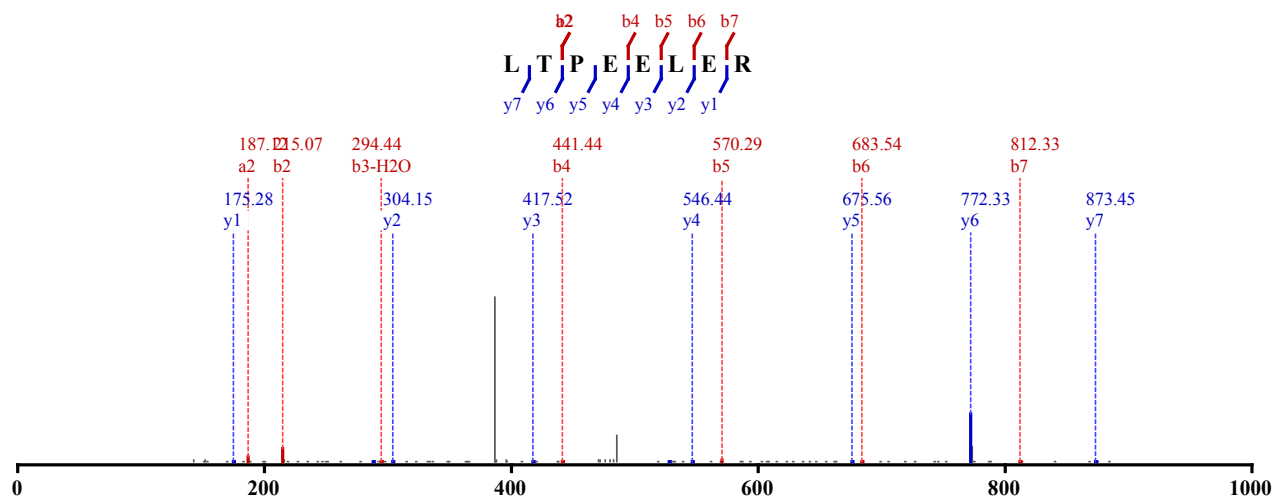

Not Modified  
 Identified in MSS480 with qvalue 0.00  
 Charge: 2, Exp. m/z: 493.762, Calc. m/z: 493.762  
 Data File: HeLa\_try\_pH8\_CID\_3xload\_3, Scans: 22530 - 22530

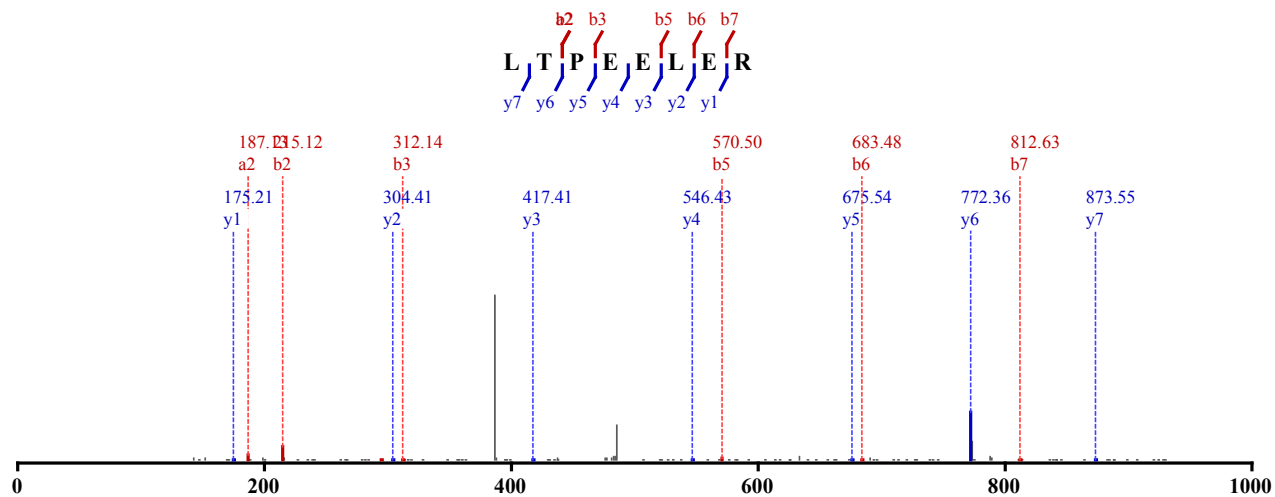

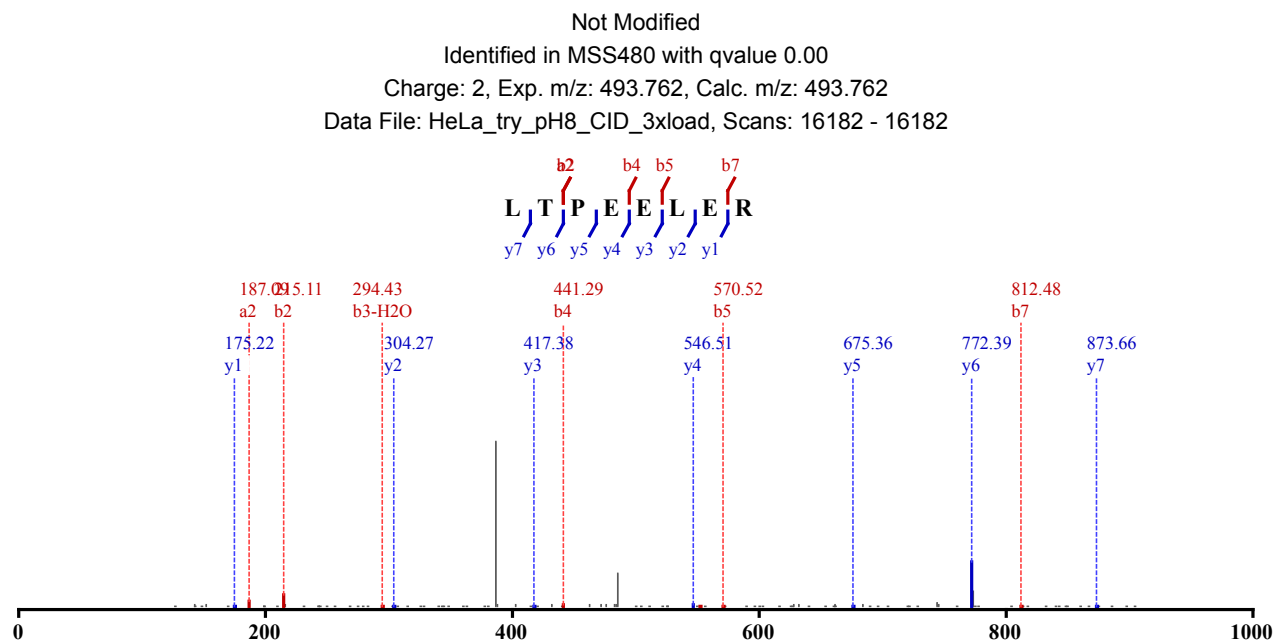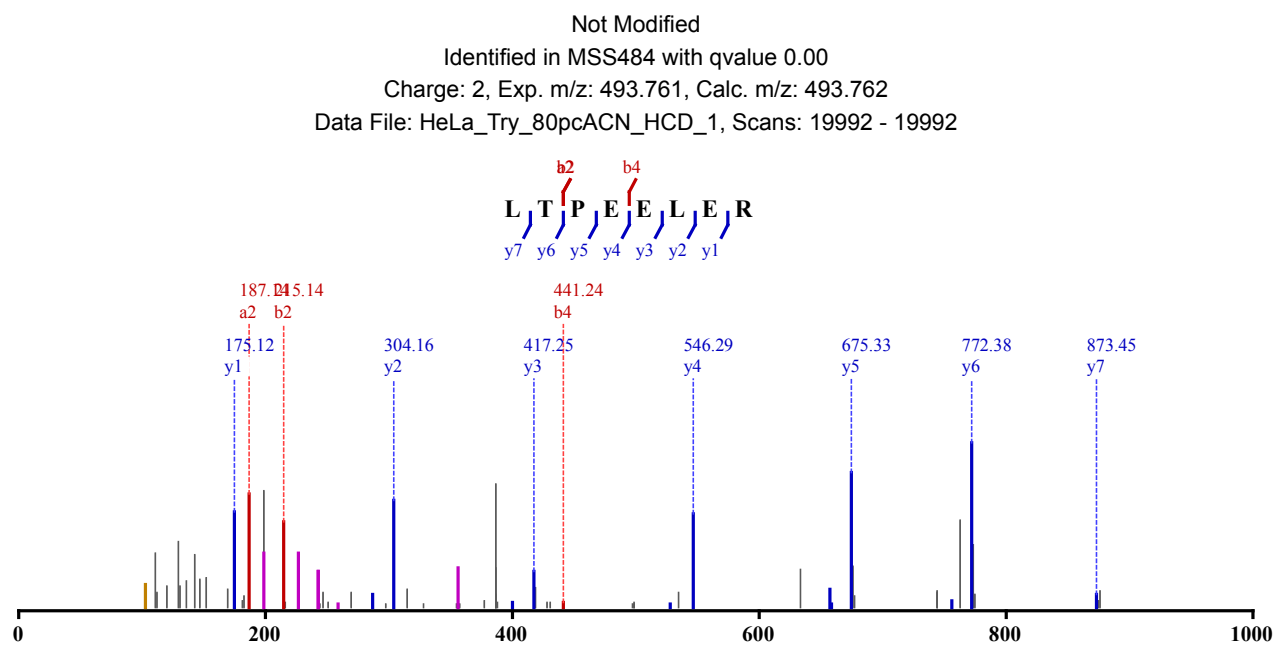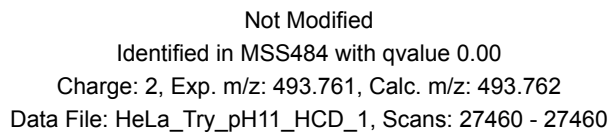

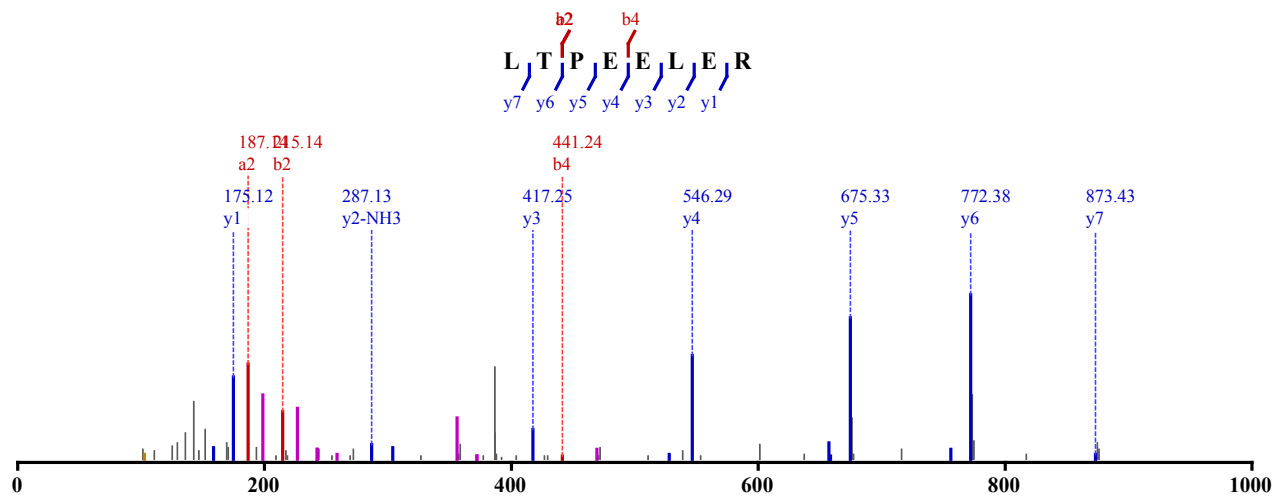

Not Modified

Identified in MSS484 with qvalue 0.00

Charge: 2, Exp. m/z: 493.761, Calc. m/z: 493.762

Data File: HeLa\_Try\_pH11\_HCD\_1, Scans: 27793 - 27793

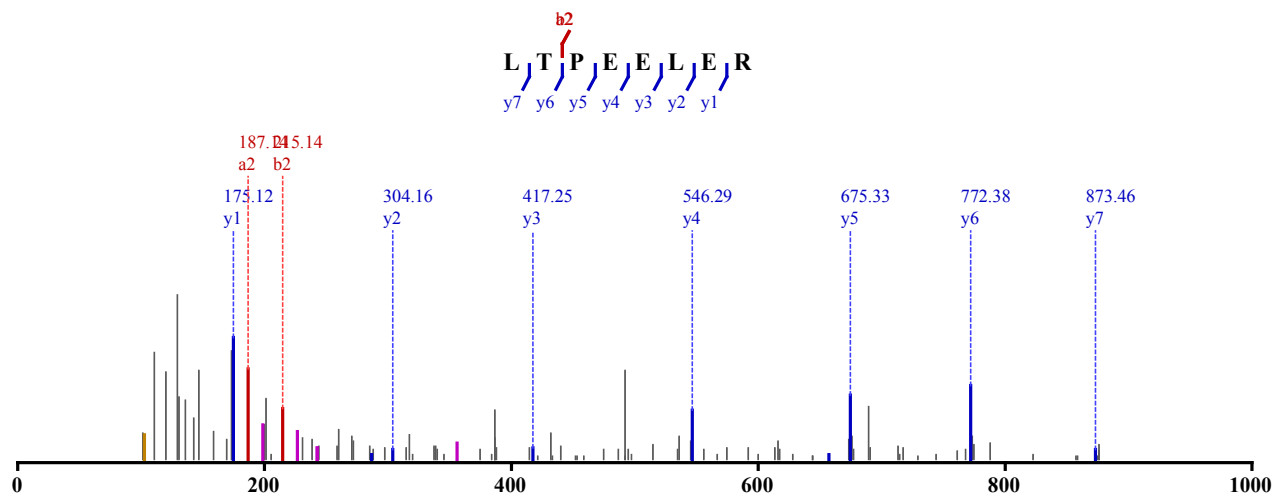

Not Modified

Identified in MSS484 with qvalue 0.00

Charge: 2, Exp. m/z: 493.761, Calc. m/z: 493.762

Data File: HeLa\_Try\_pH11\_HCD\_2, Scans: 28346 - 28346

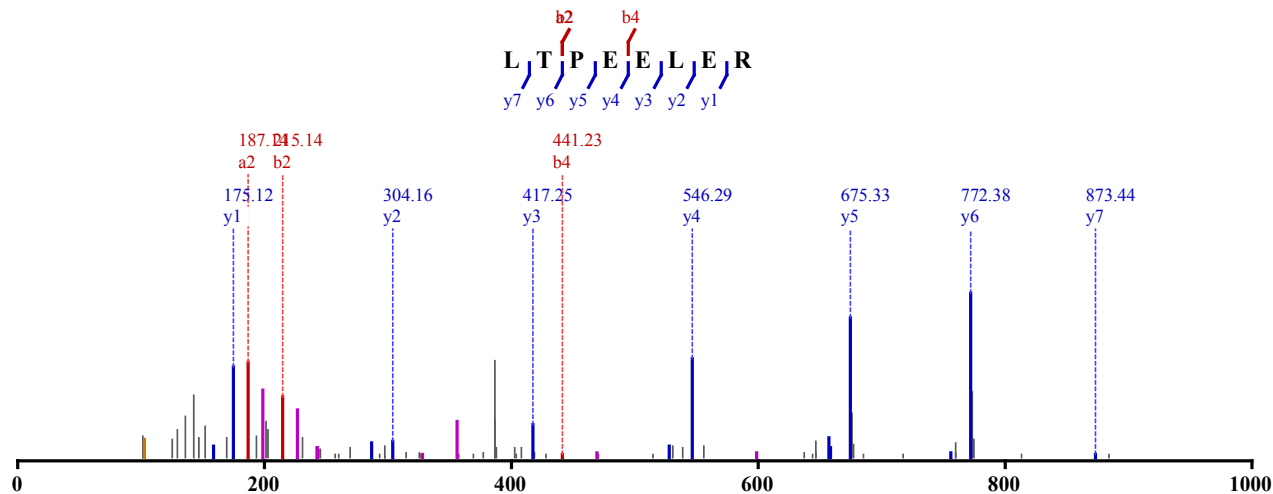

Not Modified

Identified in MSS484 with qvalue 0.00

Charge: 2, Exp. m/z: 493.762, Calc. m/z: 493.762



Data File: HeLa\_Try\_pH11\_HCD\_2, Scans: 28461 - 28461

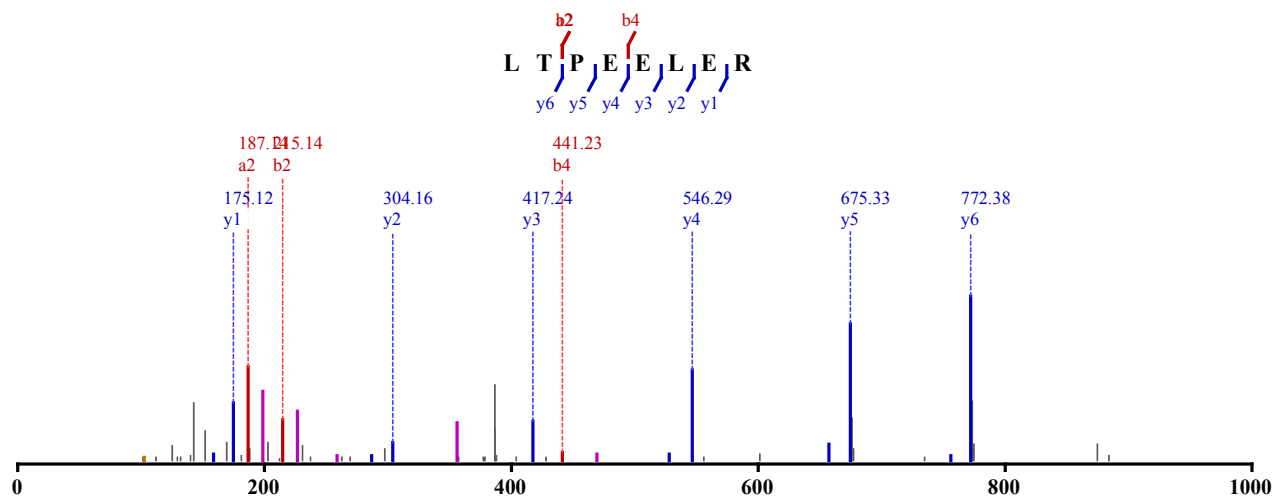

Not Modified

Identified in MSS484 with qvalue 0.00

Charge: 2, Exp. m/z: 493.762, Calc. m/z: 493.762

Data File: HeLa\_Try\_pH11\_HCD\_2, Scans: 28593 - 28593

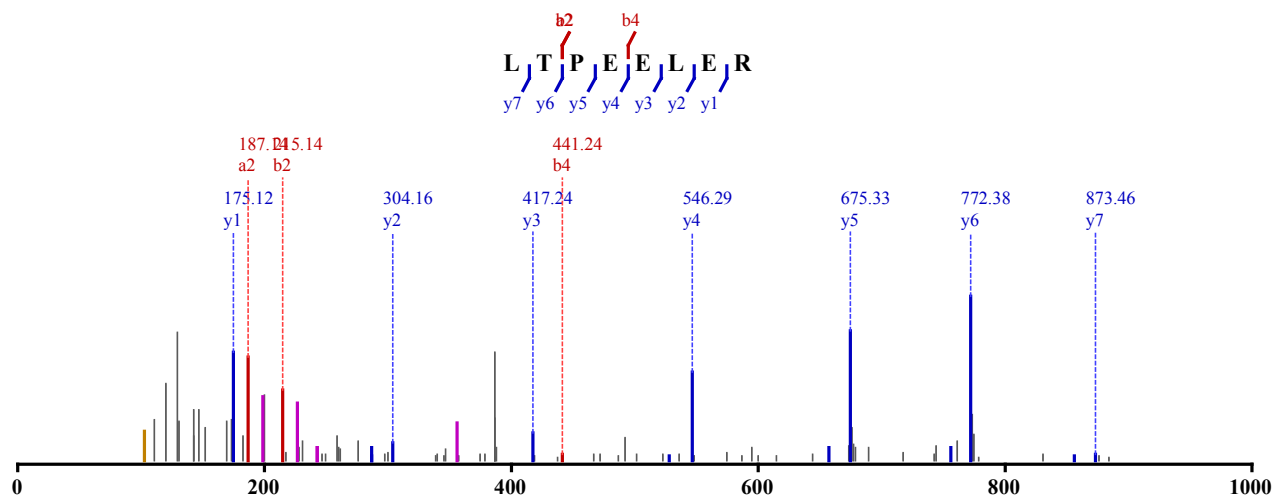

Not Modified

Identified in MSS484 with qvalue 0.00

Charge: 2, Exp. m/z: 493.763, Calc. m/z: 493.762

Data File: HeLa\_Try\_pH11\_HCD\_2, Scans: 29057 - 29057

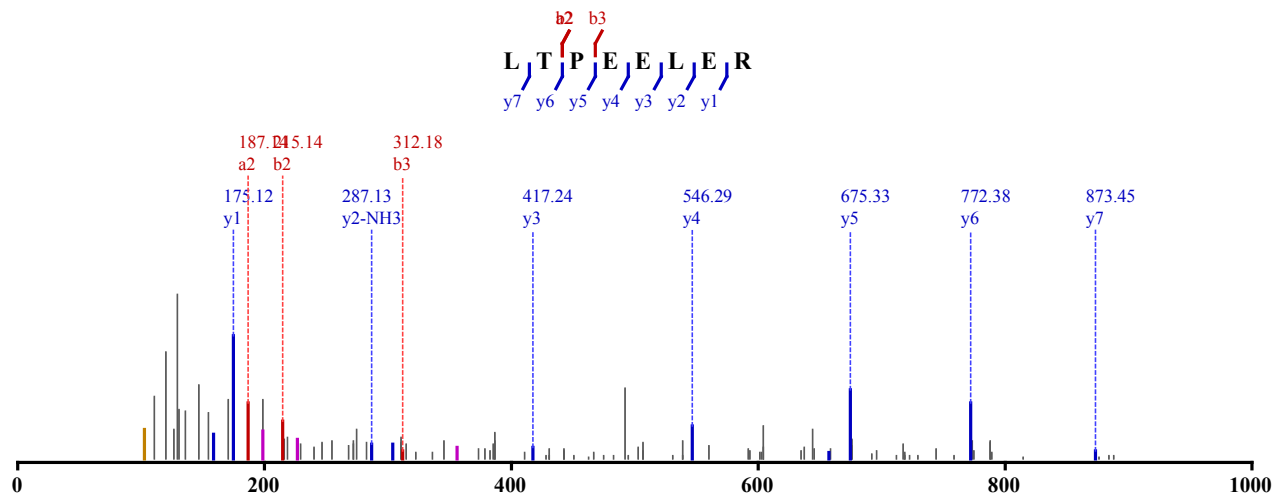

Not Modified

Identified in MSS484 with qvalue 0.00  
 Charge: 2, Exp. m/z: 493.761, Calc. m/z: 493.762  
 Data File: HeLa\_Try\_pH11\_HCD\_3, Scans: 25588 - 25588

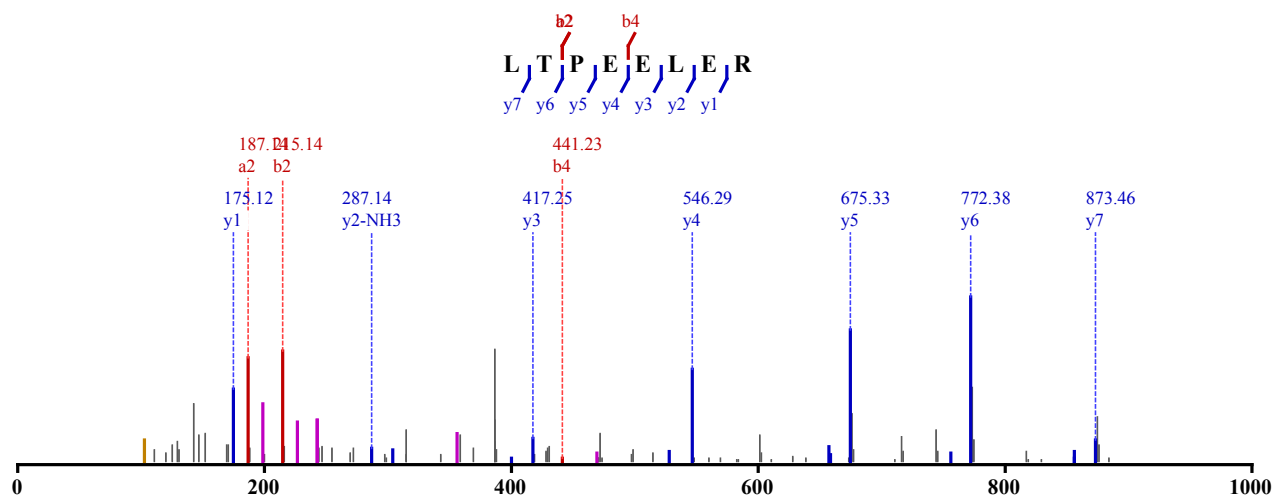

Not Modified  
 Identified in MSS484 with qvalue 0.00  
 Charge: 2, Exp. m/z: 493.761, Calc. m/z: 493.762  
 Data File: HeLa\_Try\_pH2\_HCD\_2, Scans: 17764 - 17764

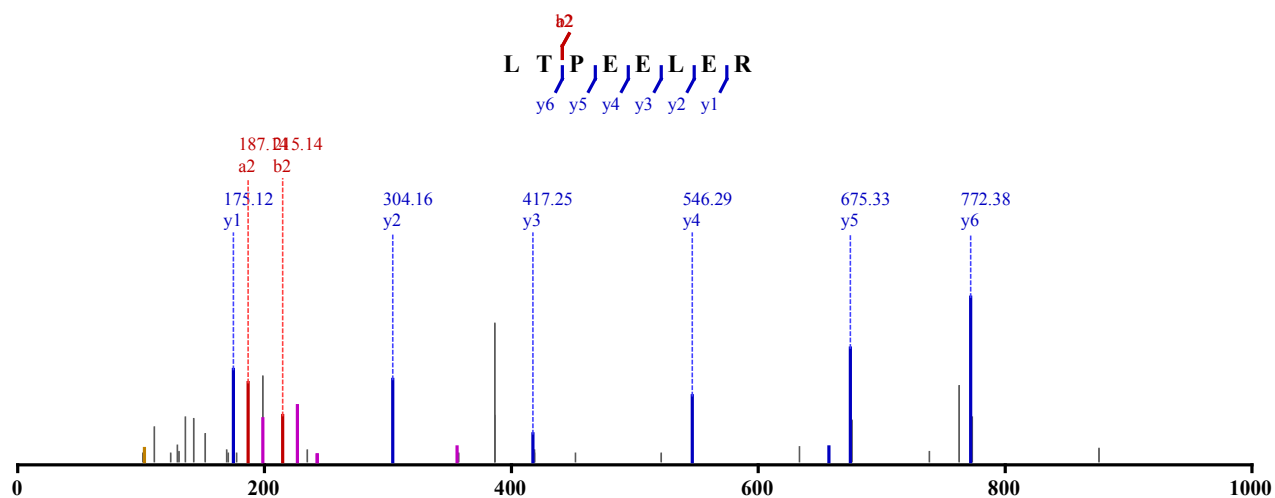

Not Modified  
 Identified in MSS484 with qvalue 0.00  
 Charge: 2, Exp. m/z: 493.761, Calc. m/z: 493.762  
 Data File: HeLa\_Try\_pH2\_HCD\_3, Scans: 17741 - 17741

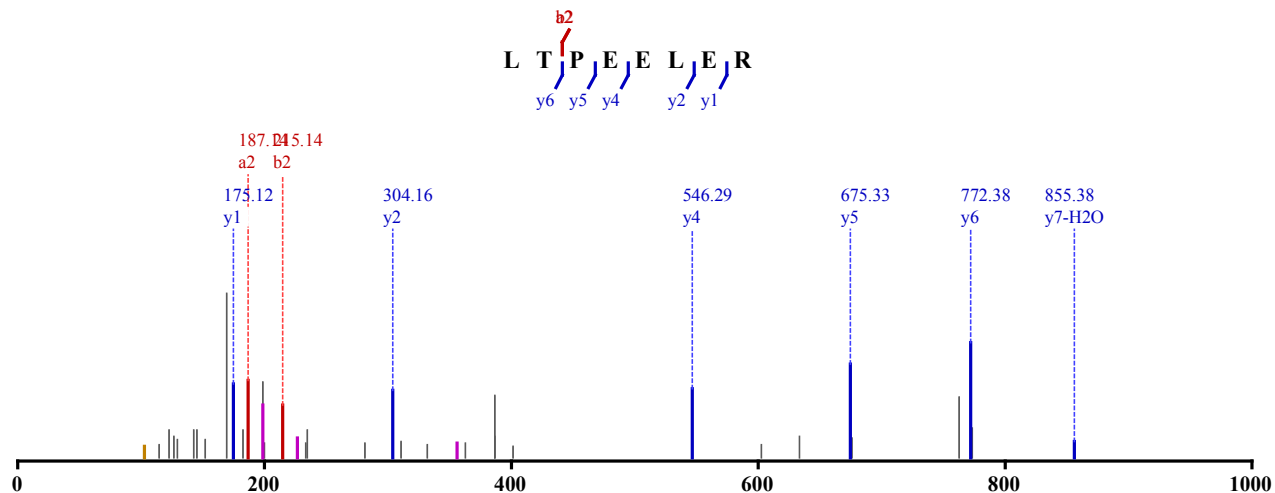

Not Modified  
 Identified in MSS484 with qvalue 0.00  
 Charge: 2, Exp. m/z: 493.761, Calc. m/z: 493.762  
 Data File: HeLa\_Try\_pH4\_HCD\_1, Scans: 25089 - 25089

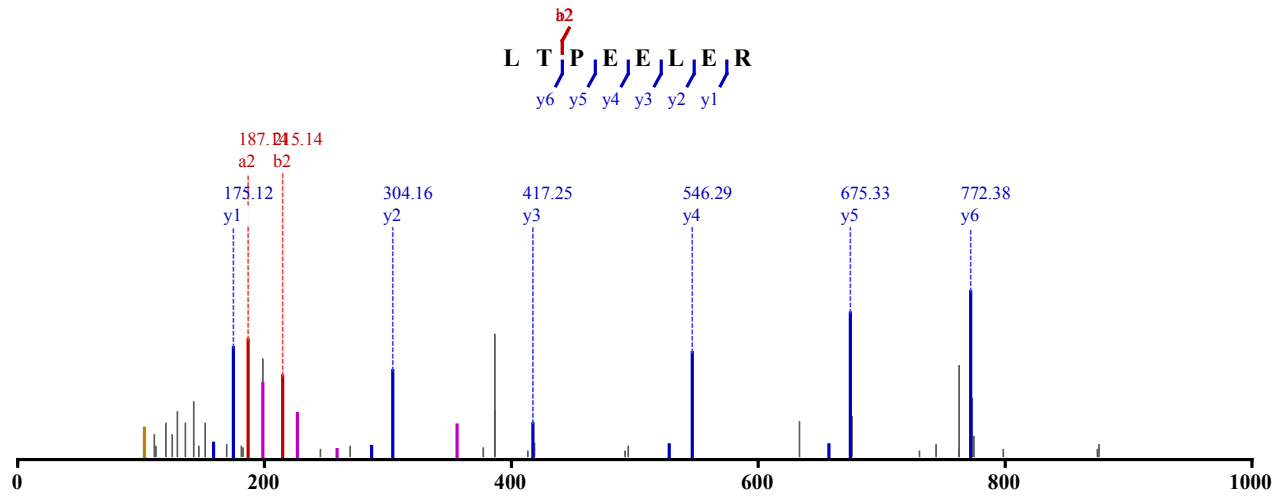

Not Modified  
 Identified in MSS484 with qvalue 0.00  
 Charge: 2, Exp. m/z: 493.761, Calc. m/z: 493.762  
 Data File: HeLa\_Try\_pH4\_HCD\_1, Scans: 25177 - 25177

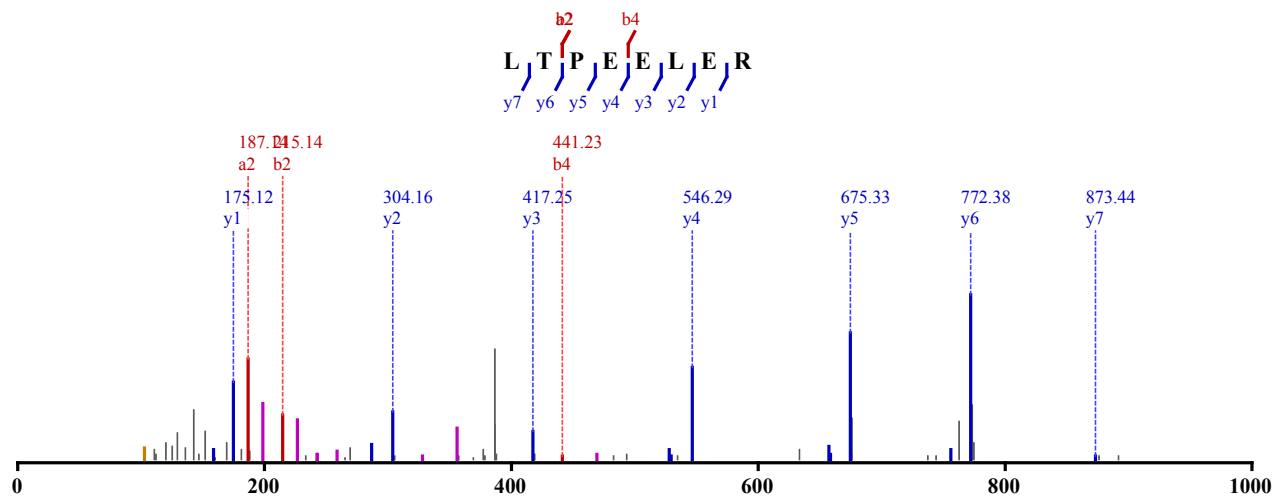

Not Modified  
 Identified in MSS484 with qvalue 0.00  
 Charge: 2, Exp. m/z: 493.761, Calc. m/z: 493.762  
 Data File: HeLa\_Try\_pH5\_HCD\_1, Scans: 25466 - 25466

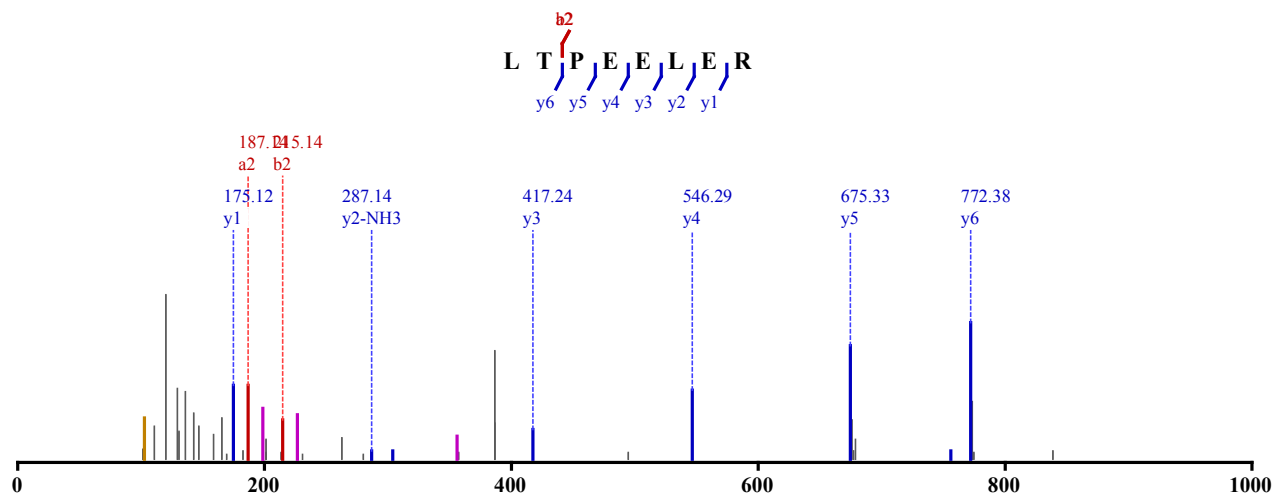

Not Modified

Identified in MSS484 with qvalue 0.00

Charge: 2, Exp. m/z: 493.761, Calc. m/z: 493.762

Data File: HeLa\_Try\_pH5\_HCD\_2, Scans: 20720 - 20720

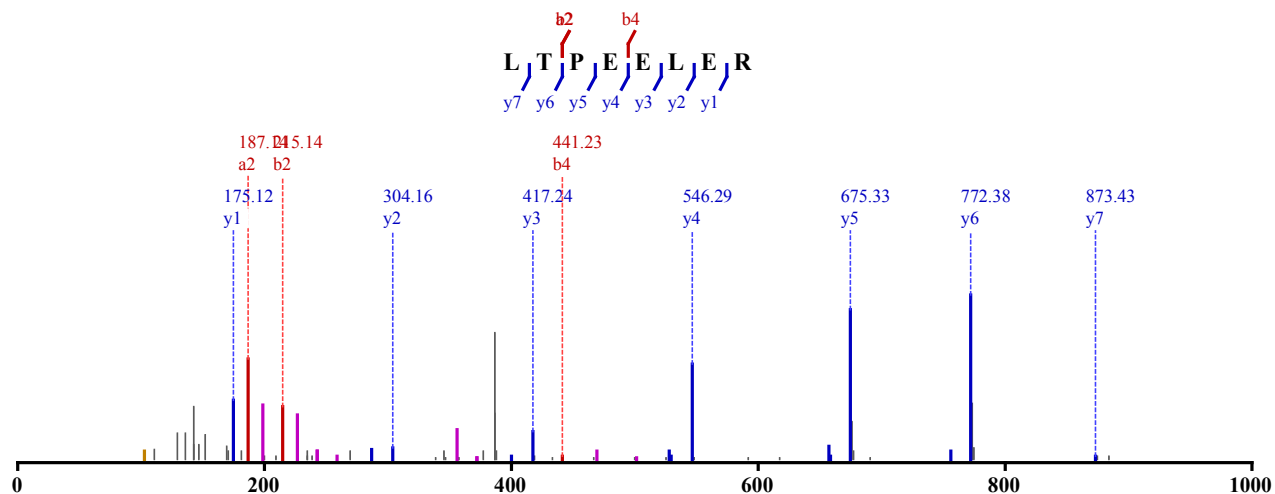

Not Modified

Identified in MSS484 with qvalue 0.00

Charge: 2, Exp. m/z: 493.761, Calc. m/z: 493.762

Data File: HeLa\_Try\_pH5\_HCD\_3, Scans: 15495 - 15495

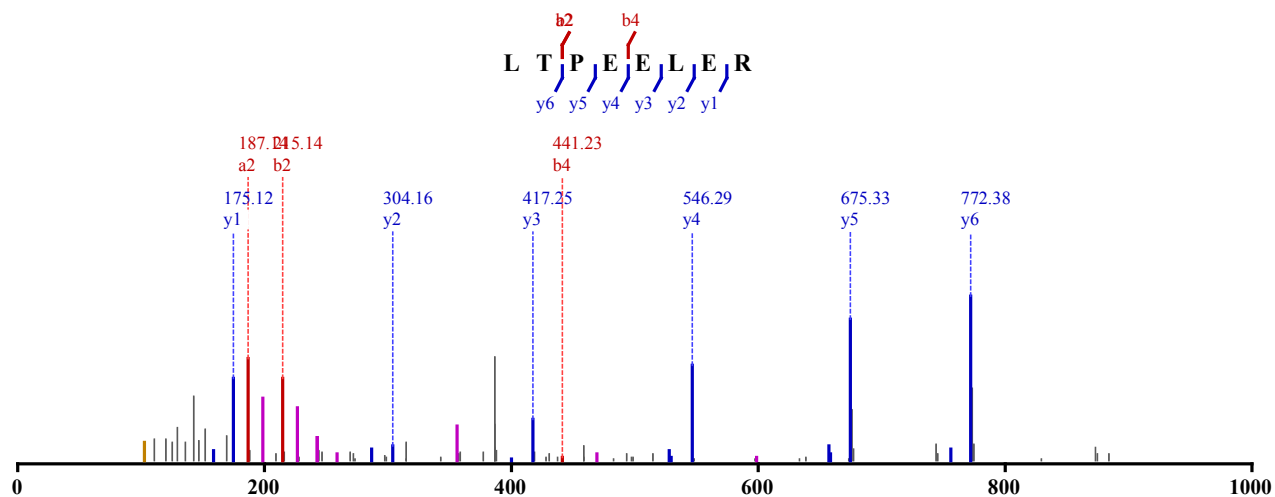

Not Modified

Identified in MSS484 with qvalue 0.00

Charge: 2, Exp. m/z: 493.761, Calc. m/z: 493.762

Data File: HeLa\_Try\_pH5\_HCD\_3, Scans: 15580 - 15580

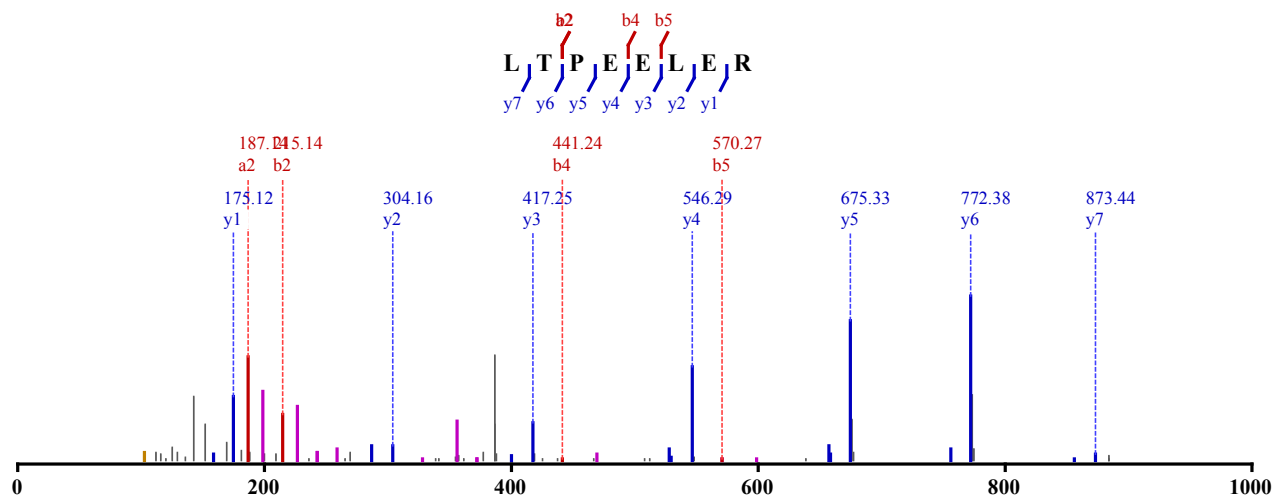

Not Modified

Identified in MSS484 with qvalue 0.00

Charge: 2, Exp. m/z: 493.761, Calc. m/z: 493.762

Data File: HeLa\_Try\_pH6\_HCD\_1, Scans: 23118 - 23118

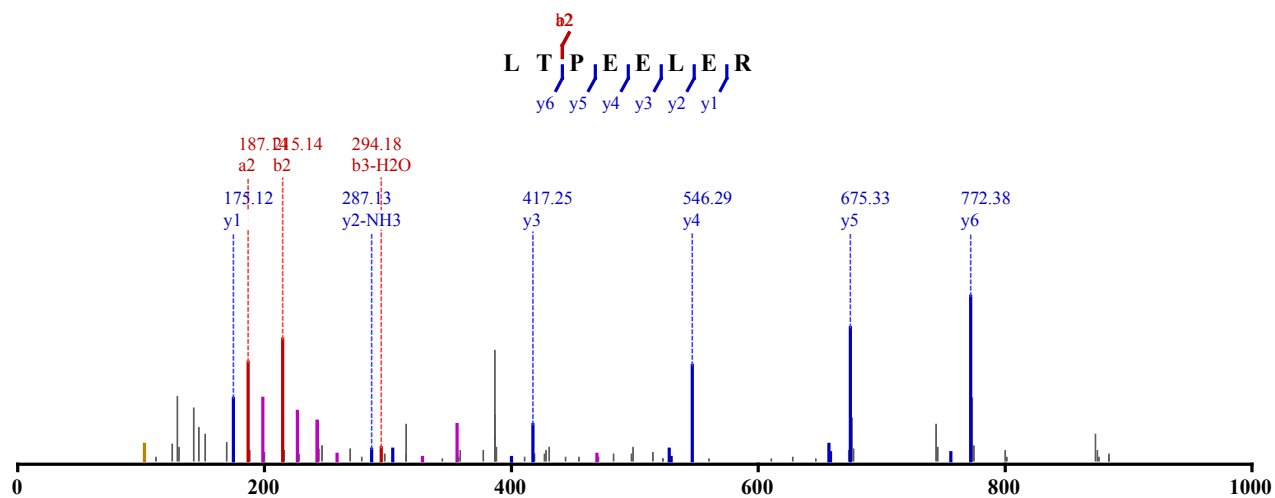

Not Modified

Identified in MSS484 with qvalue 0.00

Charge: 2, Exp. m/z: 493.762, Calc. m/z: 493.762

Data File: HeLa\_Try\_pH8\_HCD\_1, Scans: 24696 - 24696

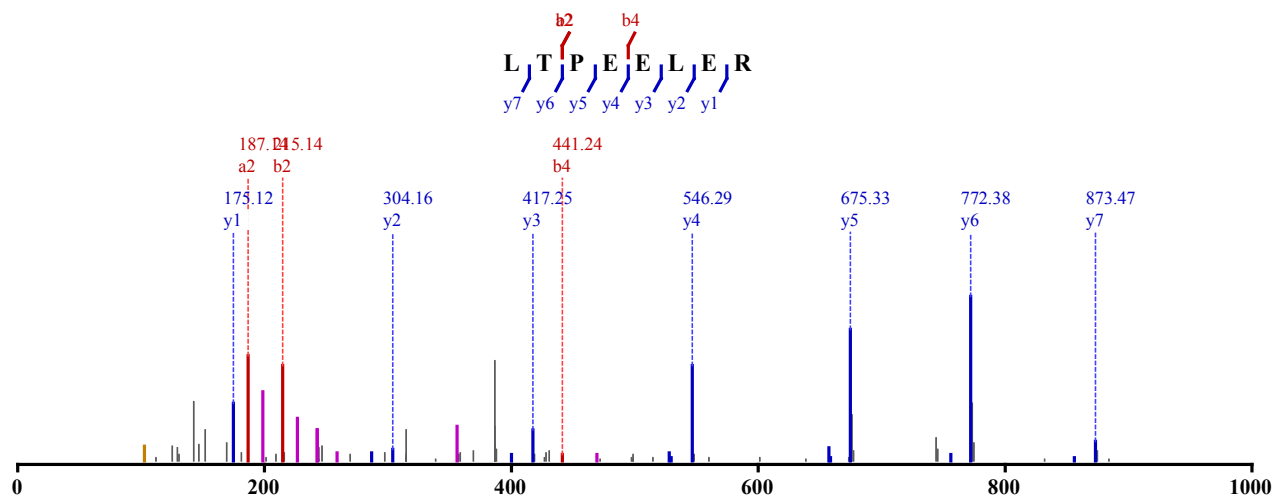

Not Modified

Identified in MSS484 with qvalue 0.00  
 Charge: 2, Exp. m/z: 493.762, Calc. m/z: 493.762  
 Data File: HeLa\_Try\_pH8\_HCD\_1, Scans: 24808 - 24808

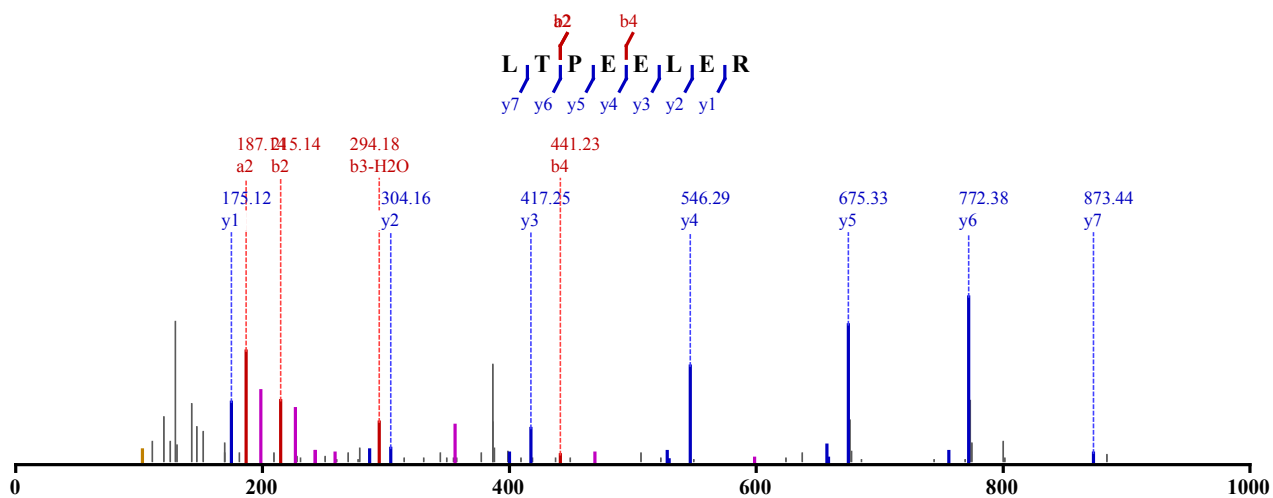

Not Modified  
 Identified in MSS484 with qvalue 0.00  
 Charge: 2, Exp. m/z: 493.762, Calc. m/z: 493.762  
 Data File: HeLa\_Try\_pH8\_HCD\_2, Scans: 20062 - 20062

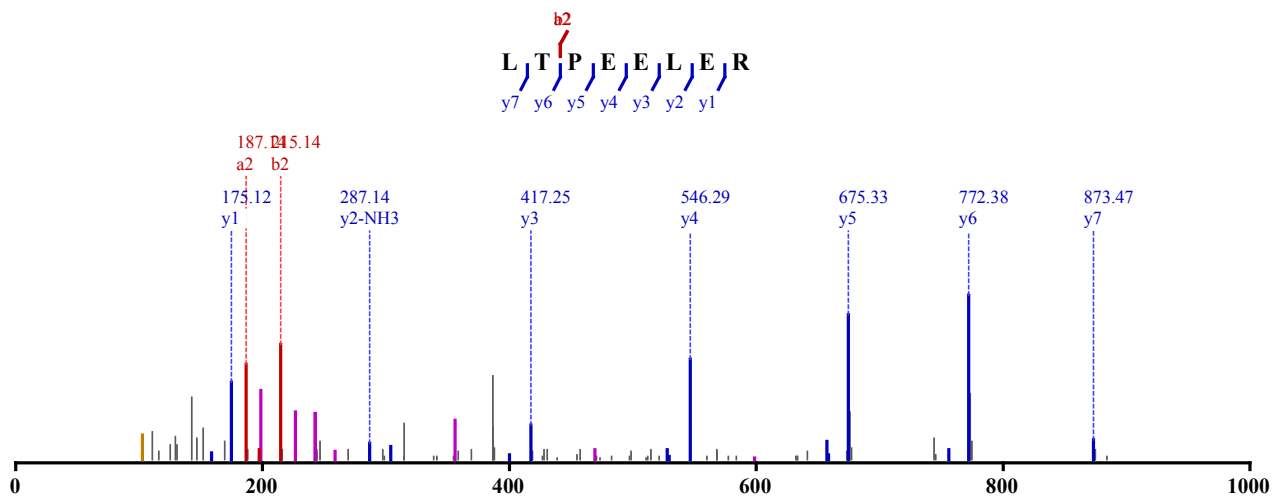

Not Modified  
 Identified in MSS484 with qvalue 0.00  
 Charge: 2, Exp. m/z: 493.761, Calc. m/z: 493.762  
 Data File: HeLa\_Try\_pH8\_HCD\_3, Scans: 23707 - 23707

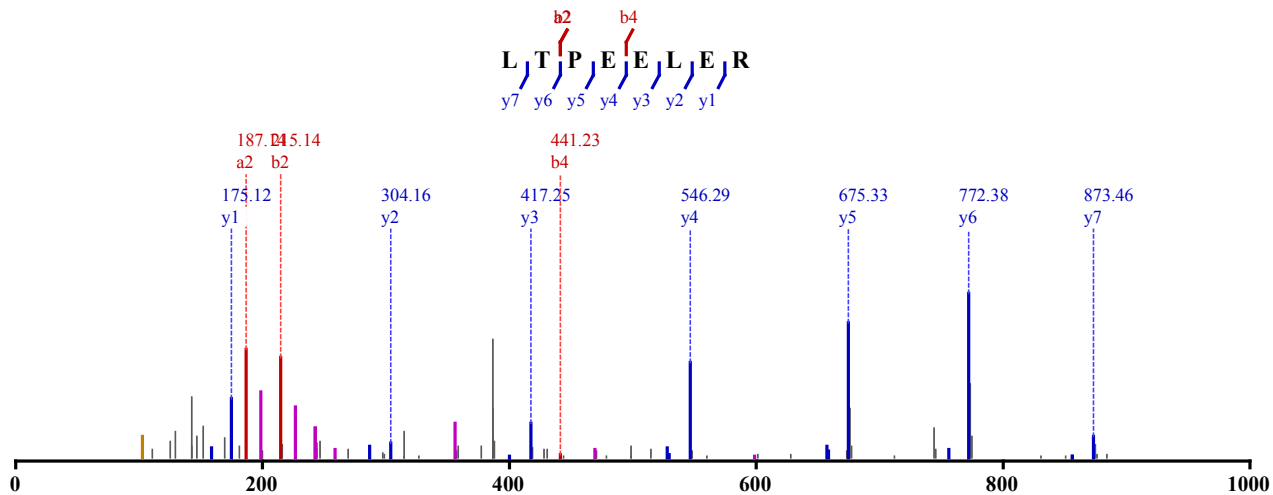

Not Modified  
 Identified in MSS484 with qvalue 0.00  
 Charge: 2, Exp. m/z: 493.762, Calc. m/z: 493.762  
 Data File: HeLa\_Try\_pH8\_HCD\_3, Scans: 23807 - 23807

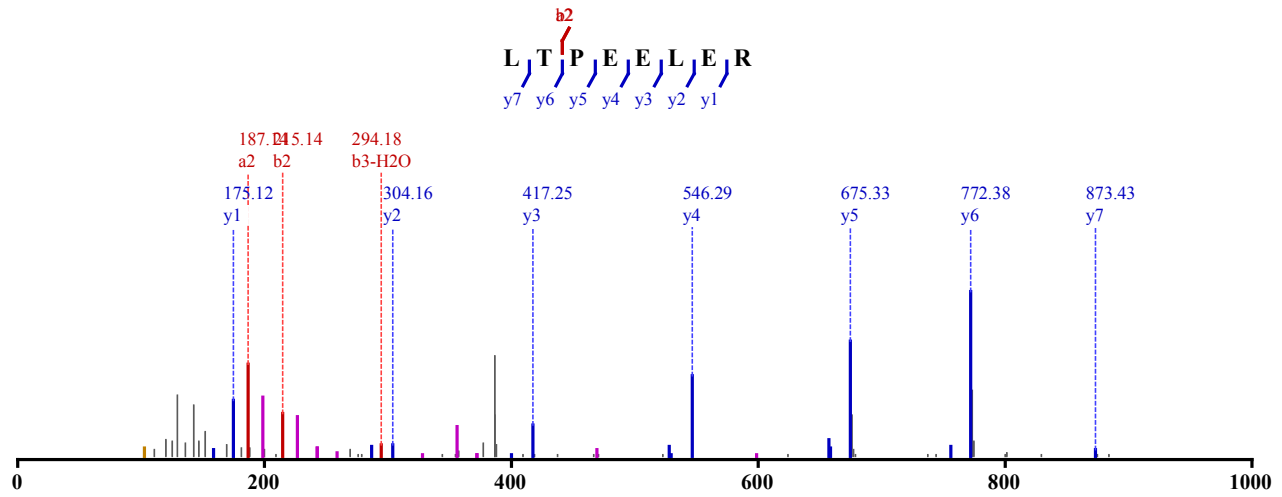

Not Modified  
 Identified in MSS487 with qvalue 0.00  
 Charge: 2, Exp. m/z: 493.761, Calc. m/z: 493.762  
 Data File: HeLa\_ArgC-Try\_pH11\_HCD\_2, Scans: 22317 - 22317

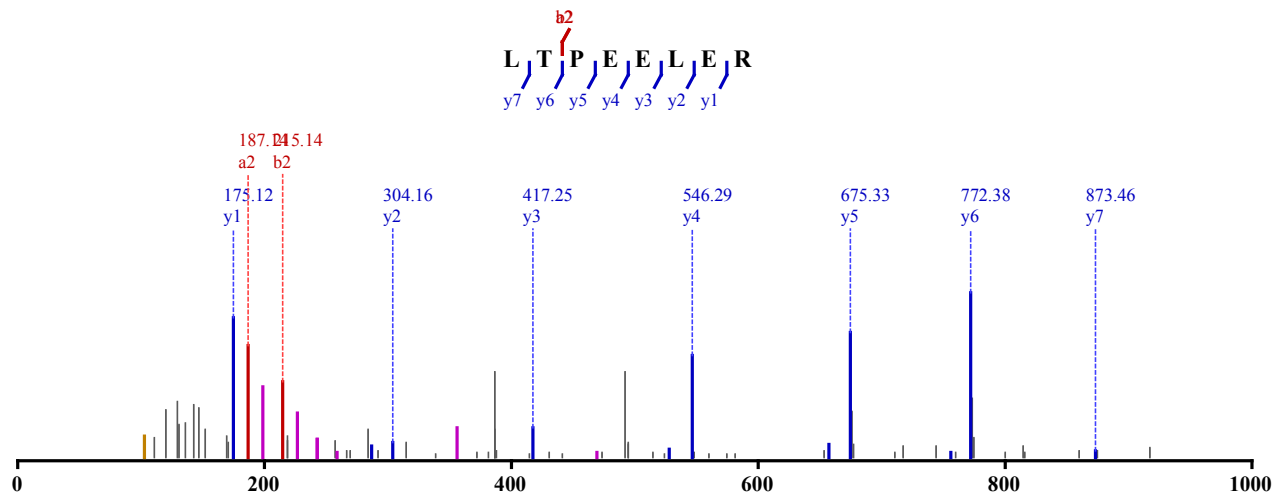

Not Modified  
 Identified in MSS487 with qvalue 0.00  
 Charge: 2, Exp. m/z: 493.761, Calc. m/z: 493.762  
 Data File: HeLa\_ArgC-Try\_pH11\_HCD\_2, Scans: 22408 - 22408

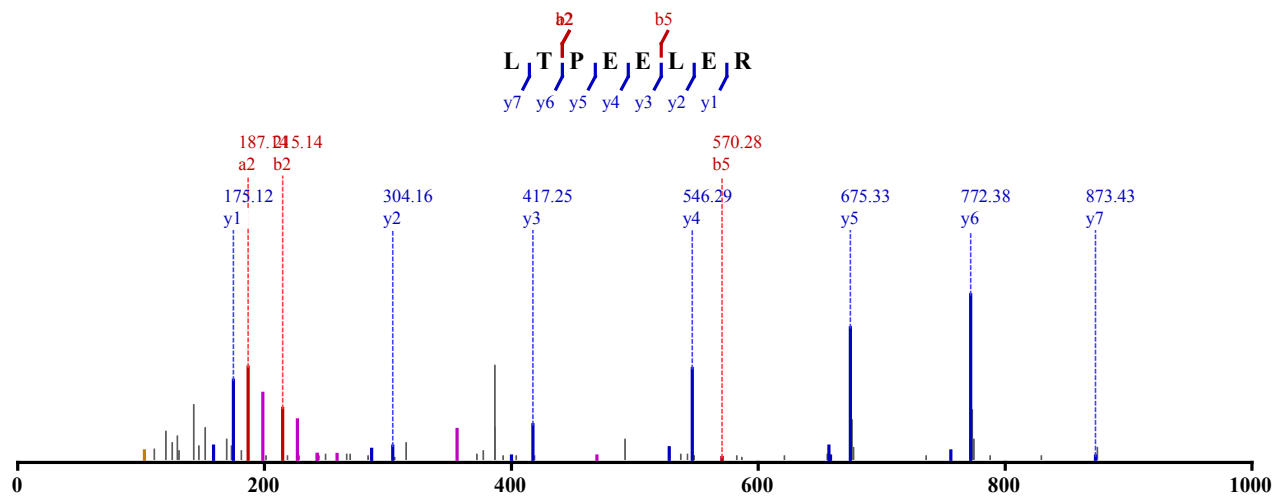

Not Modified

Identified in MSS487 with qvalue 0.00

Charge: 2, Exp. m/z: 494.265, Calc. m/z: 493.762

Data File: HeLa\_ArgC-Try\_pH11\_HCD\_2, Scans: 22520 - 22520

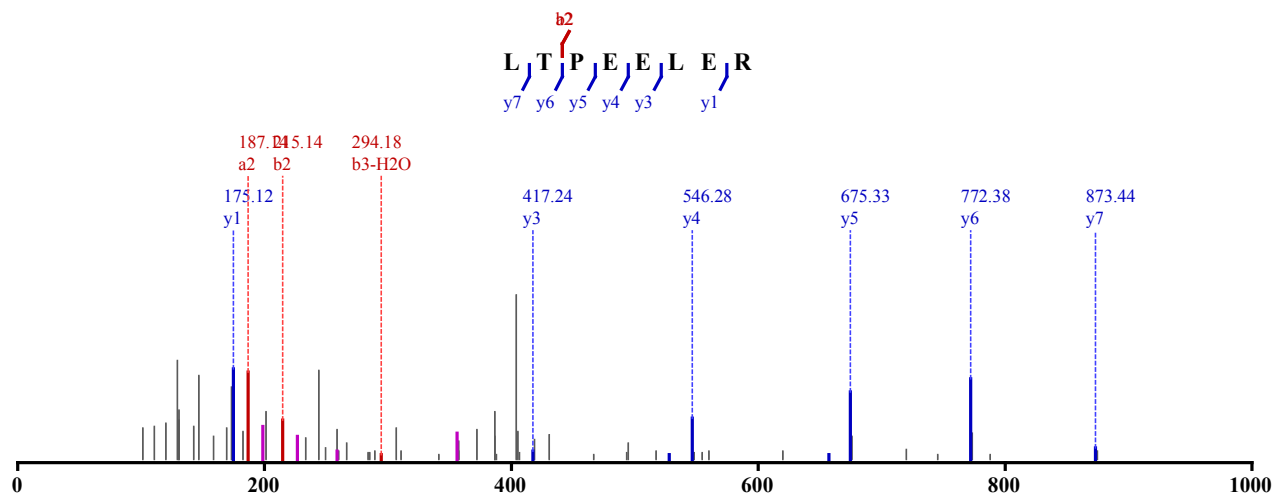

Not Modified

Identified in MSS487 with qvalue 0.00

Charge: 2, Exp. m/z: 493.761, Calc. m/z: 493.762

Data File: HeLa\_ArgC-Try\_pH6\_HCD\_1, Scans: 16492 - 16492

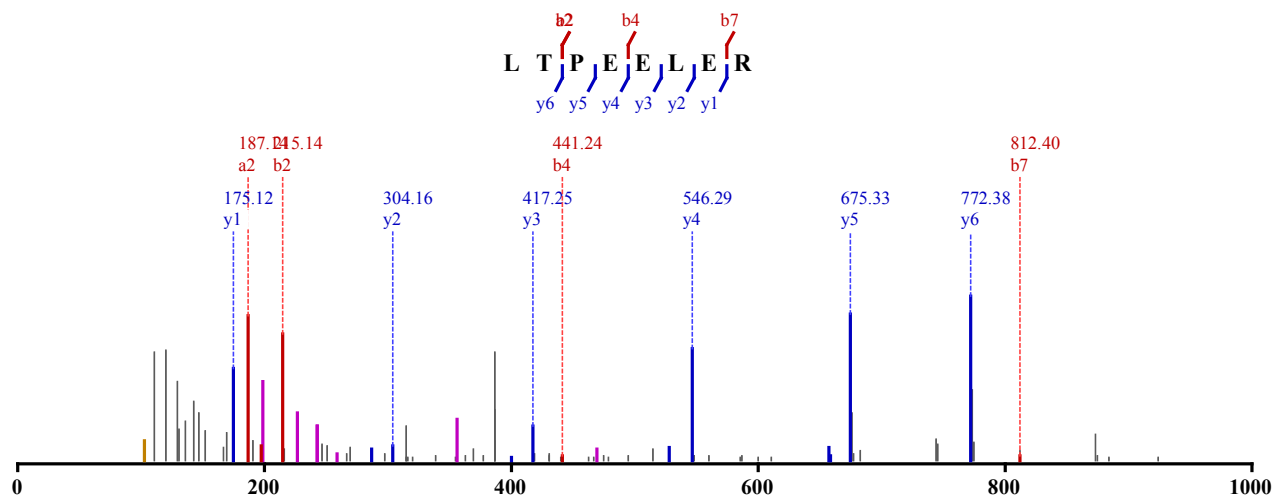

Not Modified

Identified in MSS487 with qvalue 0.00

Charge: 2, Exp. m/z: 493.761, Calc. m/z: 493.762



Data File: HeLa\_ArgC-Try\_pH6\_HCD\_2, Scans: 17004 - 17004

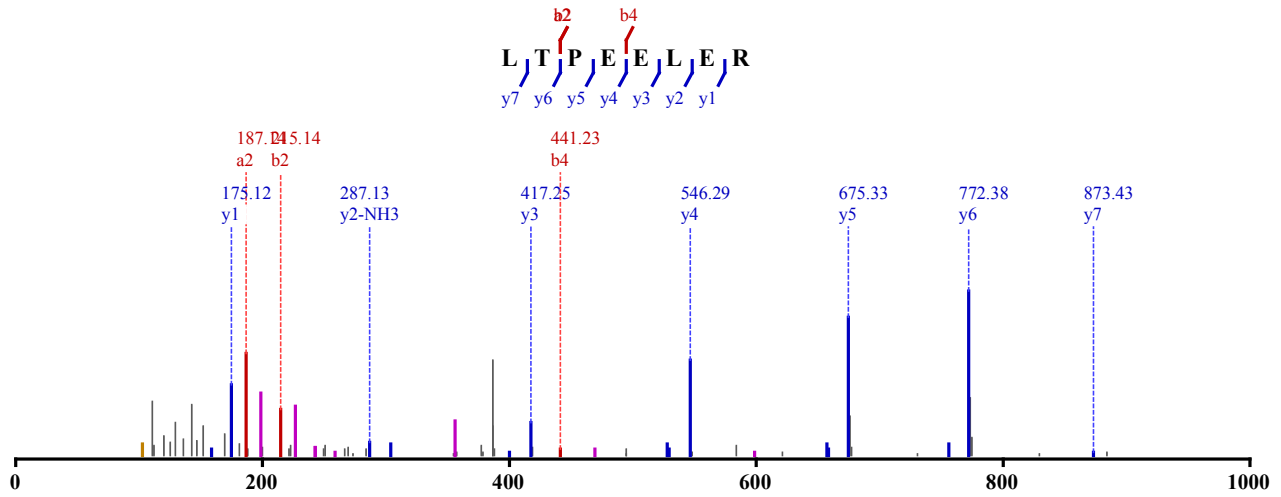

Not Modified

Identified in MSS487 with qvalue 0.00

Charge: 2, Exp. m/z: 493.761, Calc. m/z: 493.762

Data File: HeLa\_ArgC-Try\_pH6\_HCD\_3, Scans: 19134 - 19134

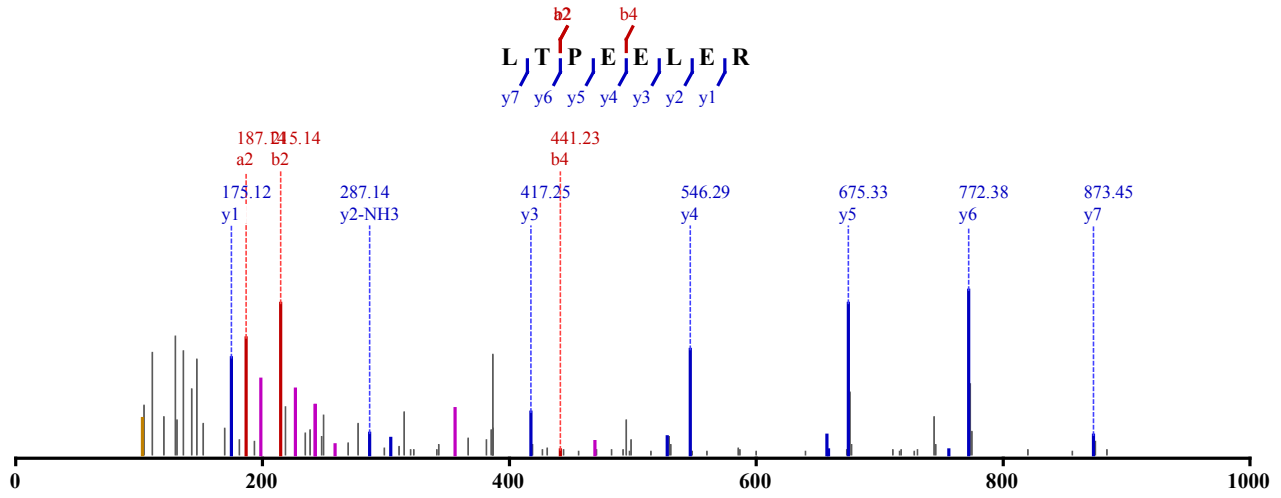

Not Modified

Identified in MSS487 with qvalue 0.00

Charge: 2, Exp. m/z: 493.762, Calc. m/z: 493.762

Data File: HeLa\_ArgC-Try\_pH6\_HCD\_3, Scans: 19227 - 19227

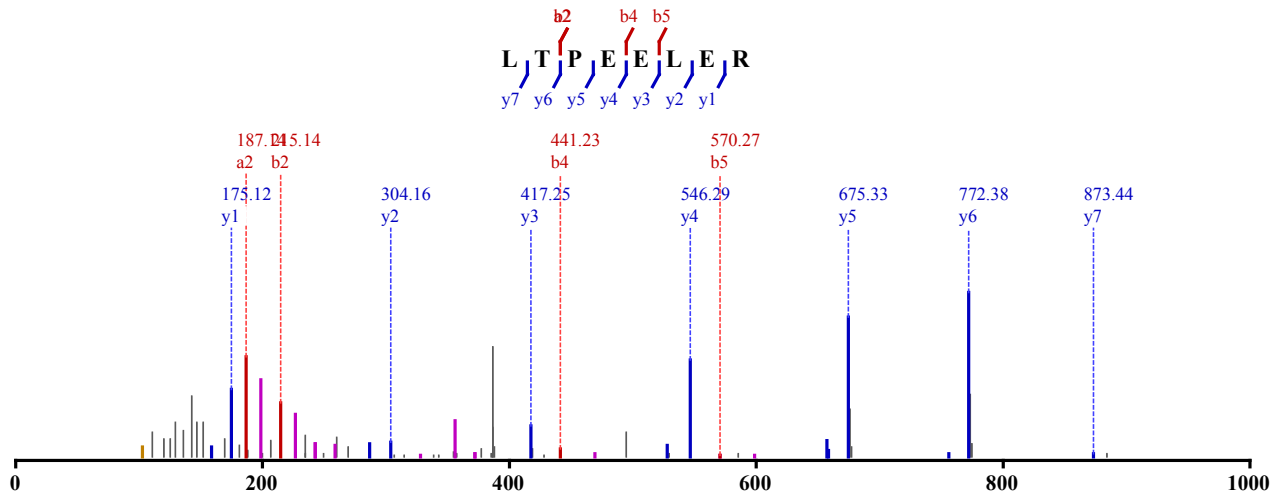

Not Modified

Identified in MSS487 with qvalue 0.00  
Charge: 2, Exp. m/z: 493.761, Calc. m/z: 493.762  
Data File: HeLa\_ArgC-Try\_pH8\_HCD\_1, Scans: 15093 - 15093

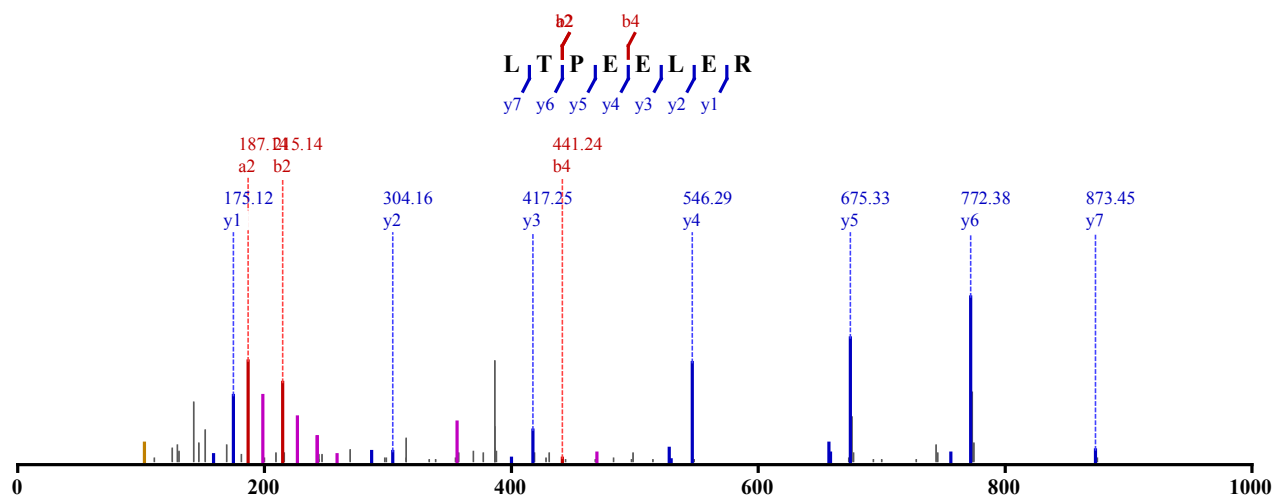

Not Modified  
Identified in MSS487 with qvalue 0.00  
Charge: 2, Exp. m/z: 494.268, Calc. m/z: 493.762  
Data File: HeLa\_ArgC-Try\_pH8\_HCD\_1, Scans: 15260 - 15260

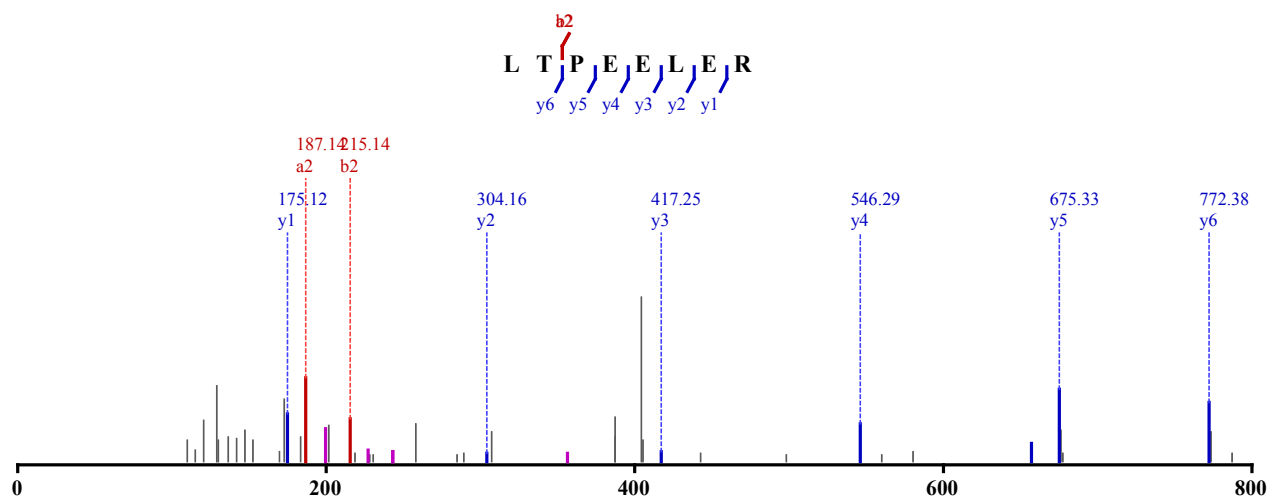

Not Modified  
Identified in MSS487 with qvalue 0.00  
Charge: 2, Exp. m/z: 493.761, Calc. m/z: 493.762  
Data File: HeLa\_ArgC-Try\_pH8\_HCD\_2, Scans: 19310 - 19310

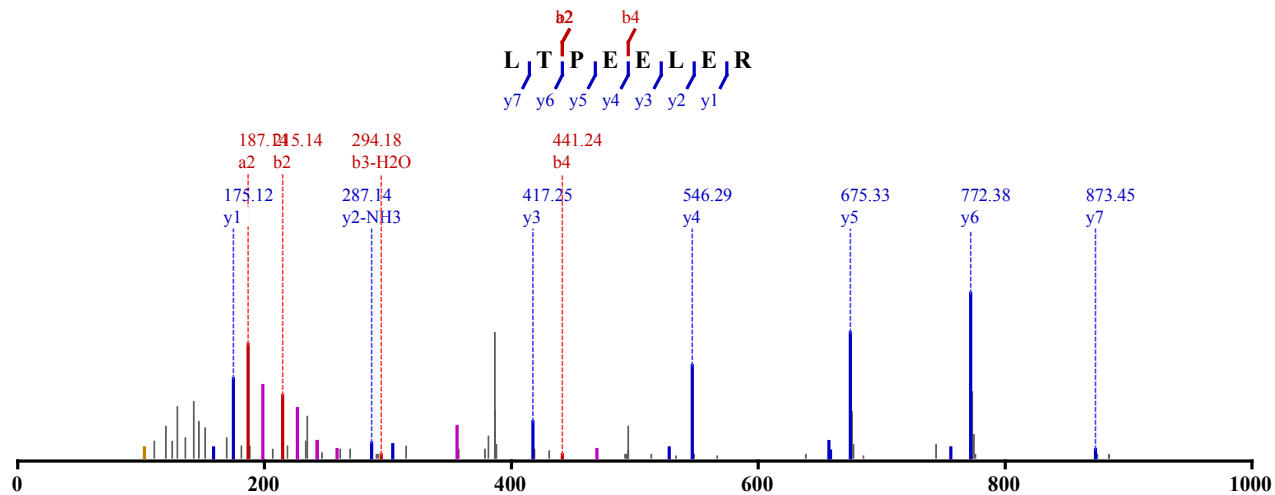

Not Modified  
 Identified in MSS487 with qvalue 0.00  
 Charge: 2, Exp. m/z: 493.761, Calc. m/z: 493.762  
 Data File: HeLa\_ArgC-Try\_pH8\_HCD\_3, Scans: 19167 - 19167

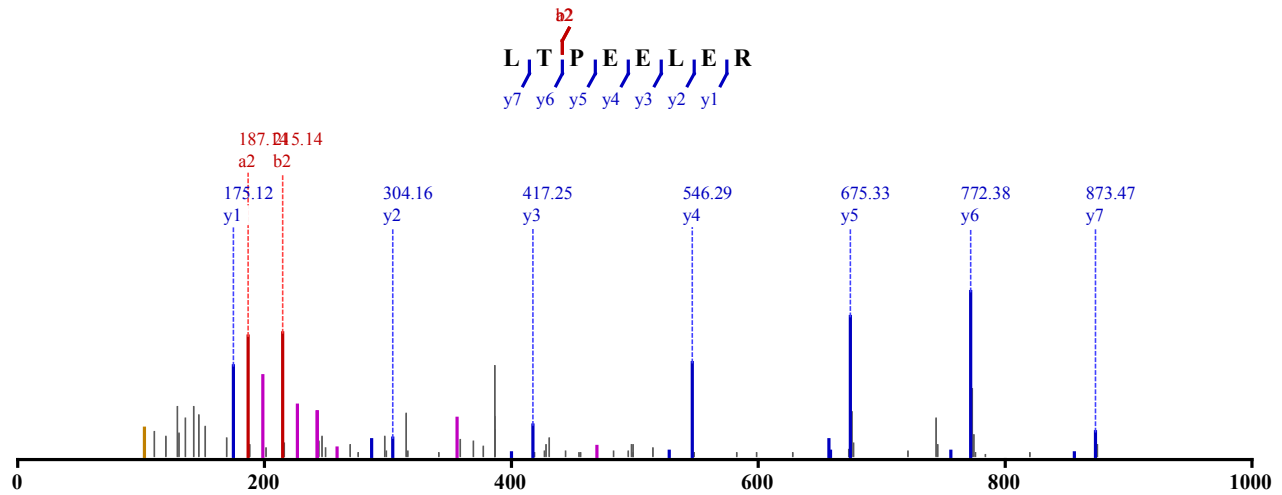

Not Modified  
 Identified in MSS487 with qvalue 0.00  
 Charge: 2, Exp. m/z: 493.761, Calc. m/z: 493.762  
 Data File: HeLa\_ArgC-Try\_pH8\_HCD\_3, Scans: 19245 - 19245

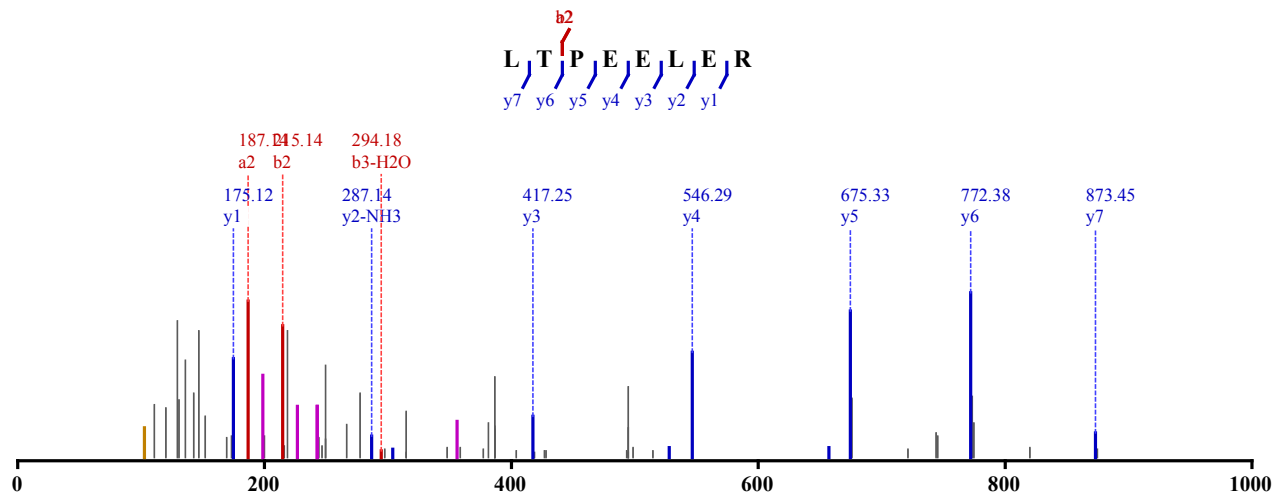

Not Modified  
 Identified in MSS488 with qvalue 0.00  
 Charge: 2, Exp. m/z: 493.762, Calc. m/z: 493.762  
 Data File: HeLa\_chy-try\_pH11\_CID\_3xload\_2, Scans: 9915 - 9915

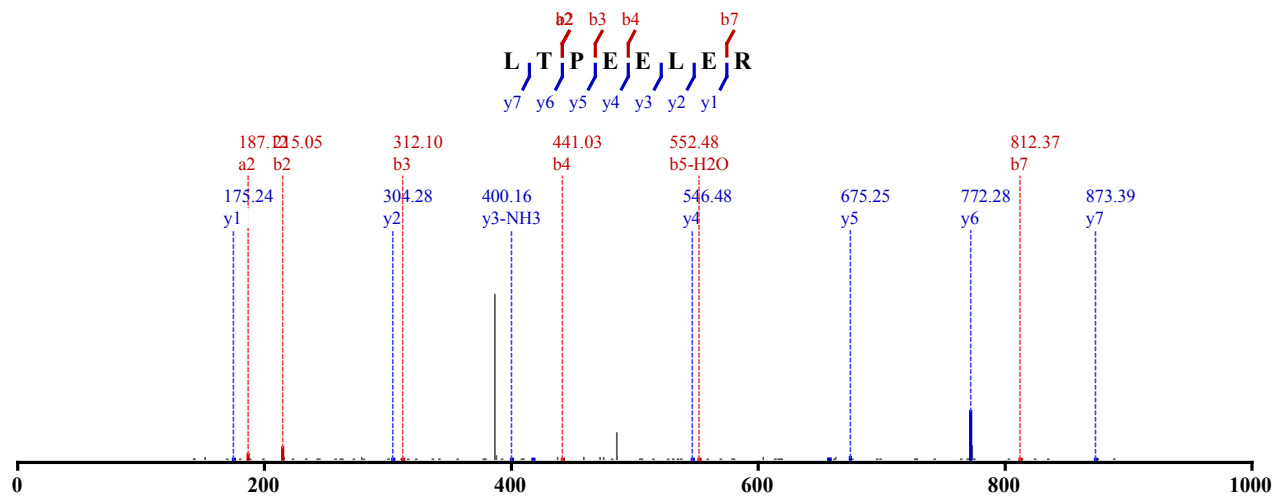

Not Modified  
 Identified in MSS488 with qvalue 0.01  
 Charge: 2, Exp. m/z: 493.761, Calc. m/z: 493.762  
 Data File: HeLa\_chy-try\_pH6\_CID\_3xload\_3, Scans: 17444 - 17444

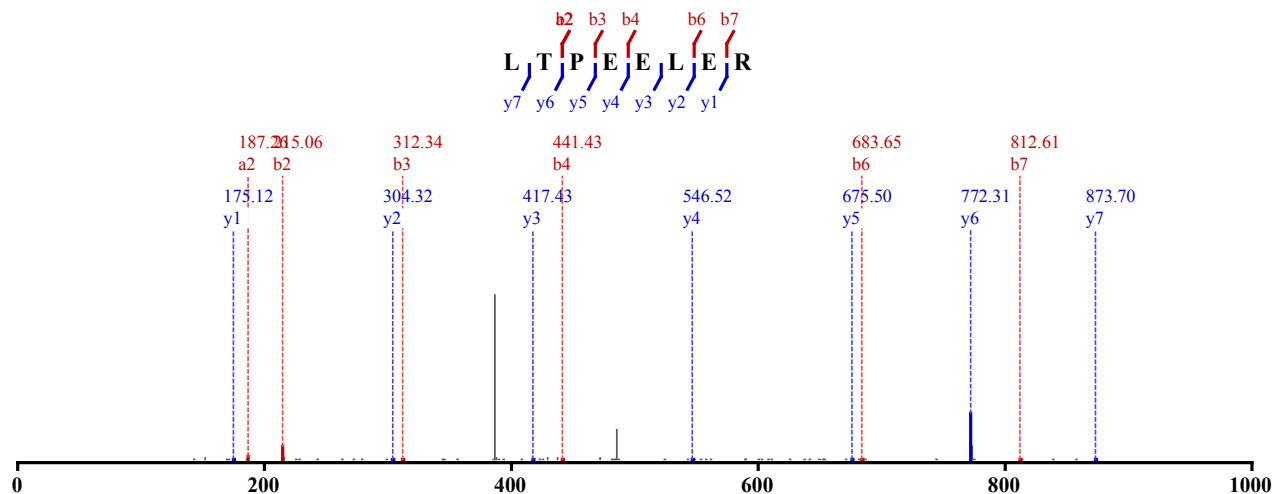

Not Modified  
 Identified in MSS488 with qvalue 0.00  
 Charge: 2, Exp. m/z: 493.762, Calc. m/z: 493.762  
 Data File: HeLa\_chy-try\_pH8\_CID\_3xload\_3, Scans: 12192 - 12192

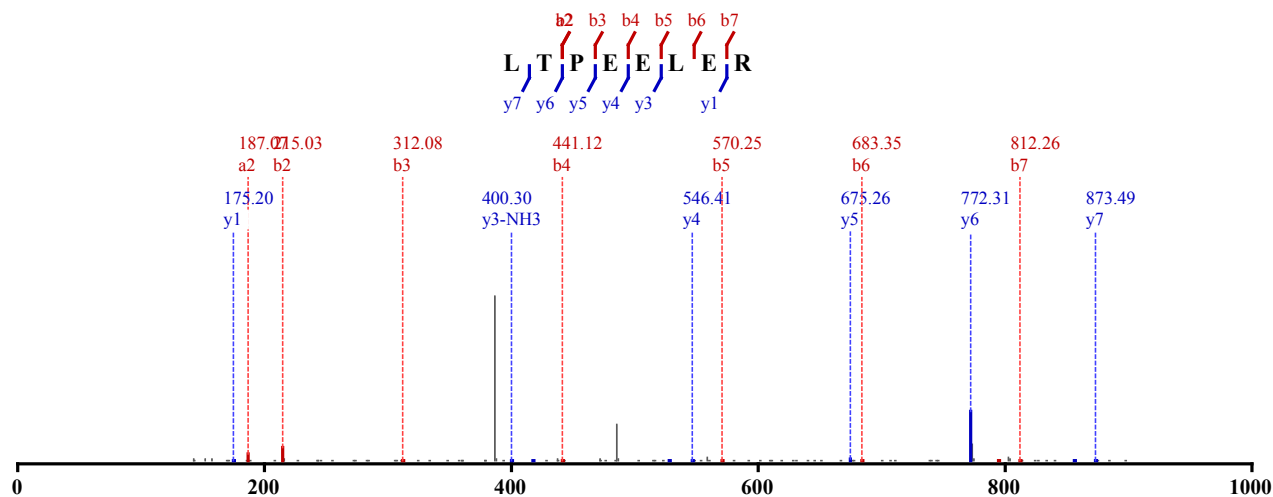

Not Modified  
 Identified in MSS488 with qvalue 0.00  
 Charge: 2, Exp. m/z: 493.762, Calc. m/z: 493.762

Data File: HeLa\_chy-try\_pH8\_CID\_3xload, Scans: 24503 - 24503

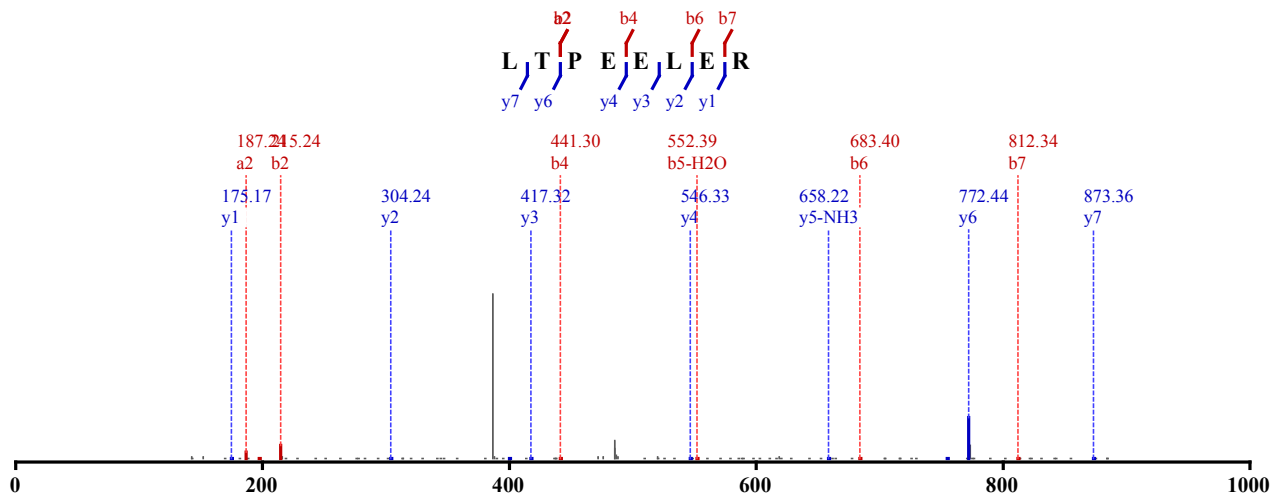

Not Modified

Identified in MSS485 with qvalue 0.00

Charge: 3, Exp. m/z: 906.426, Calc. m/z: 906.427

Data File: HeLa\_LysC\_pH3\_HCD\_1, Scans: 40479 - 40479

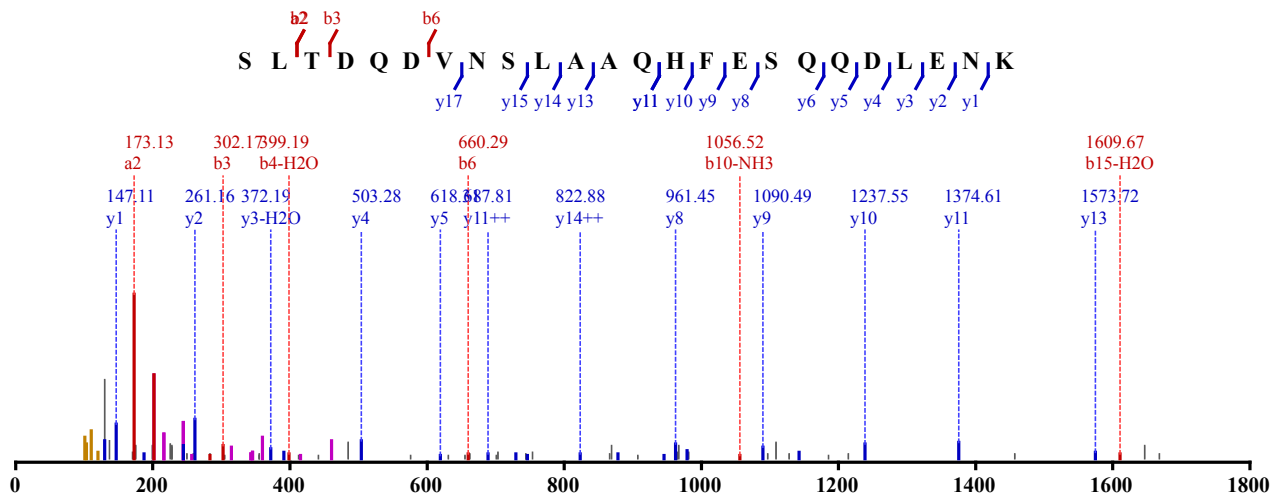

Not Modified

Identified in MSS479 with qvalue 0.00

Charge: 3, Exp. m/z: 489.908, Calc. m/z: 489.907

Data File: HeLa\_AspN\_pH3\_HCD\_1, Scans: 26645 - 26645

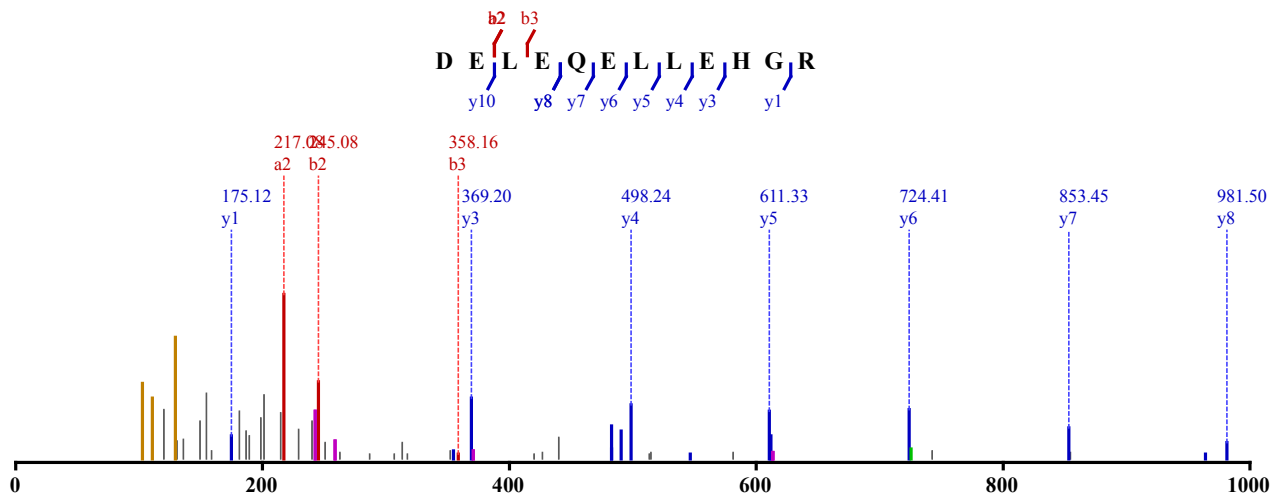

Not Modified

Identified in MSS479 with qvalue 0.00  
 Charge: 3, Exp. m/z: 489.909, Calc. m/z: 489.907  
 Data File: HeLa\_AspN\_pH3\_HCD\_2, Scans: 26086 - 26086

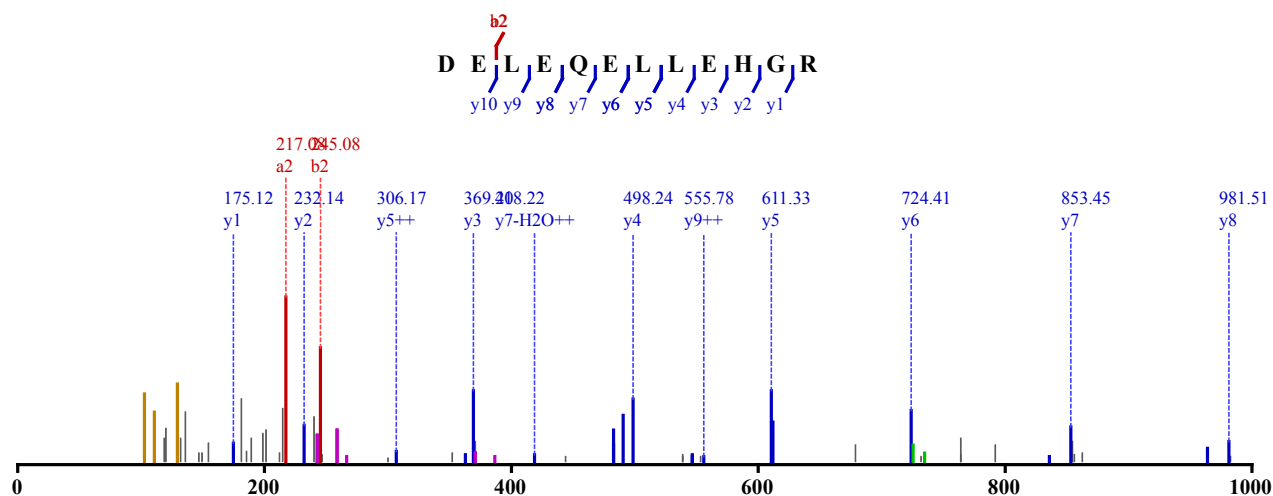

2 x Oxidation (M) 1 x Acetylation (Protein N-term)  
 Identified in MSS484 with qvalue 0.00  
 Charge: 3, Exp. m/z: 767.044, Calc. m/z: 767.044  
 Data File: HeLa\_Try\_pH5\_HCD\_3, Scans: 34681 - 34681

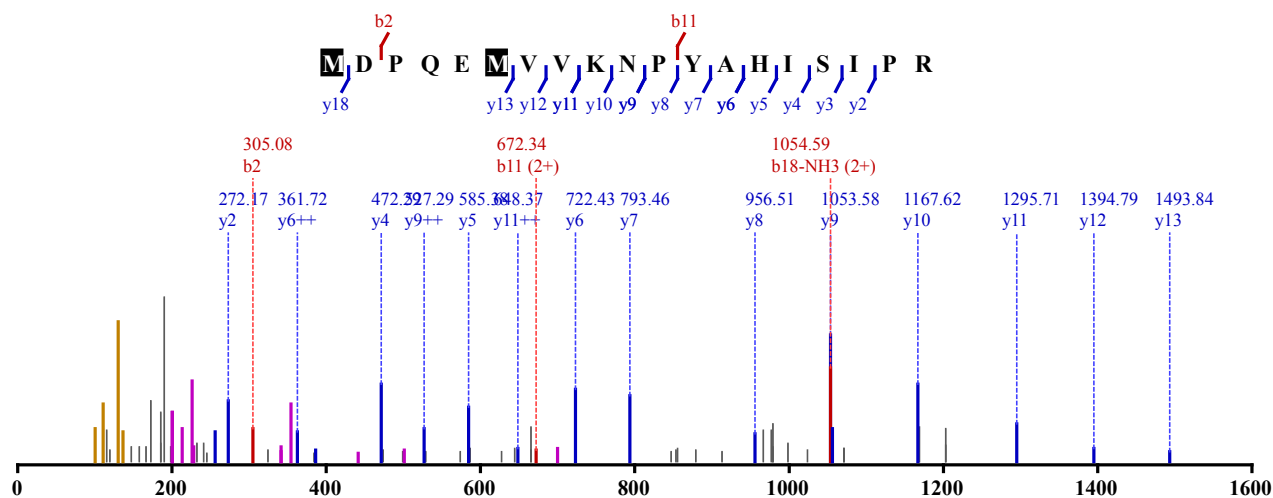

Not Modified  
 Identified in MSS113 with qvalue 0.00  
 Charge: 2, Exp. m/z: 643.877, Calc. m/z: 643.877  
 Data File: HeLa\_try\_CID\_2, Scans: 49051 - 49051

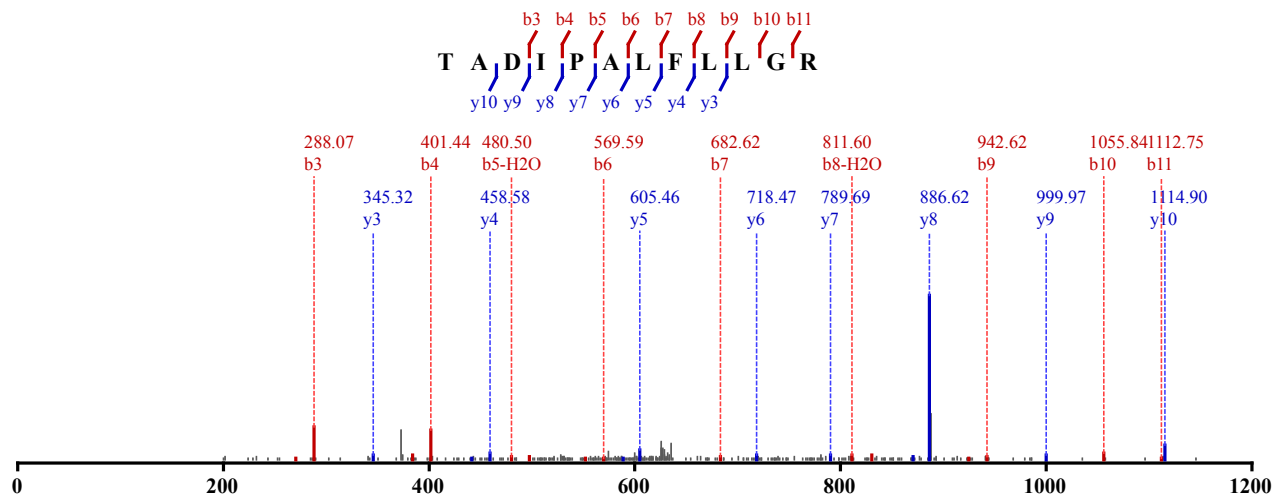

Not Modified

Identified in MSS130 with qvalue 0.00

Charge: 2, Exp. m/z: 643.877, Calc. m/z: 643.877

Data File: HeLa\_LysC-try\_HCD\_1, Scans: 45562 - 45562

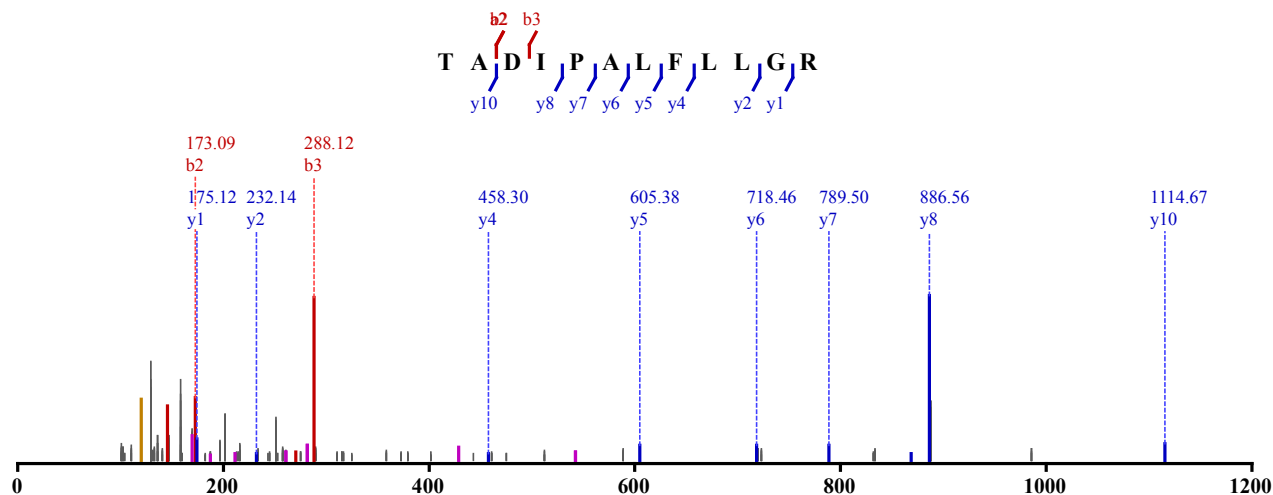

Not Modified

Identified in MSS480 with qvalue 0.01

Charge: 2, Exp. m/z: 643.877, Calc. m/z: 643.877

Data File: HeLa\_try\_pH4\_CID\_3xload, Scans: 42310 - 42310

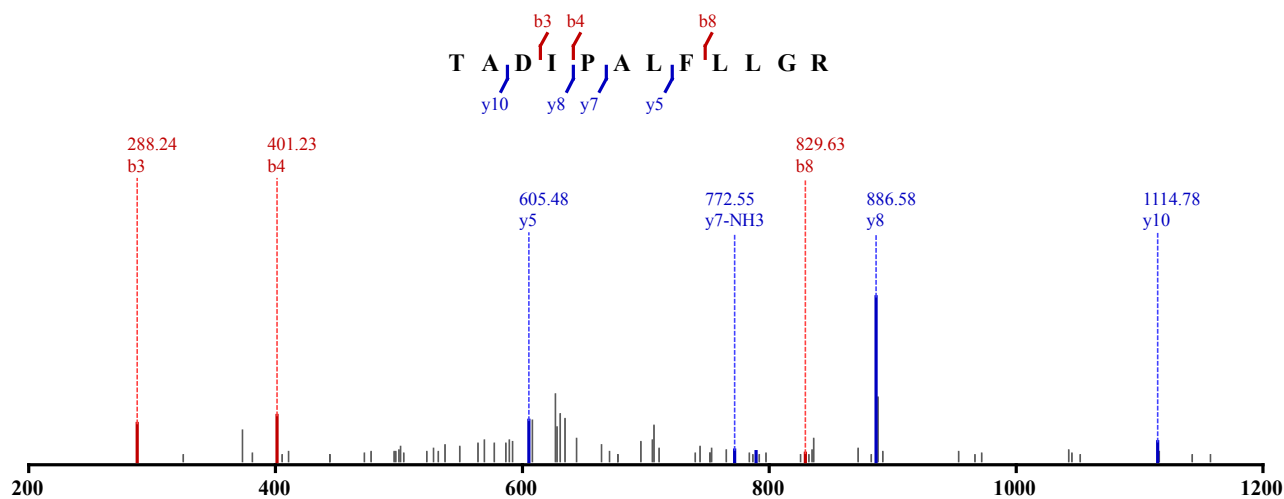

Not Modified

Identified in MSS480 with qvalue 0.00

Charge: 2, Exp. m/z: 643.878, Calc. m/z: 643.877

Data File: HeLa\_try\_pH5\_CID\_3xload, Scans: 45466 - 45466

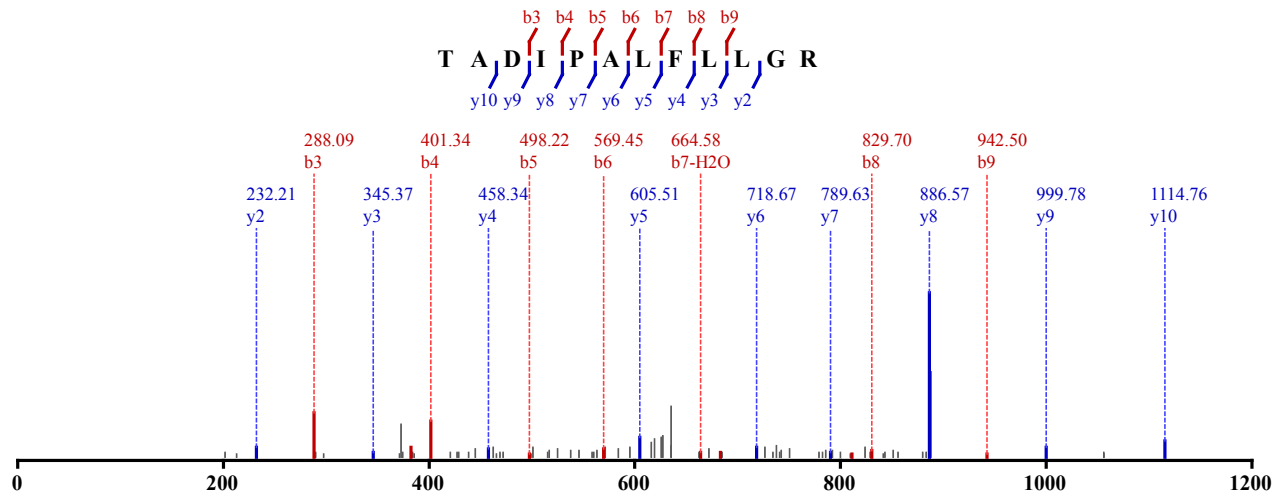

Not Modified  
 Identified in MSS480 with qvalue 0.00  
 Charge: 2, Exp. m/z: 643.877, Calc. m/z: 643.877  
 Data File: HeLa\_try\_pH4\_CID\_3xload\_2, Scans: 50536 - 50536

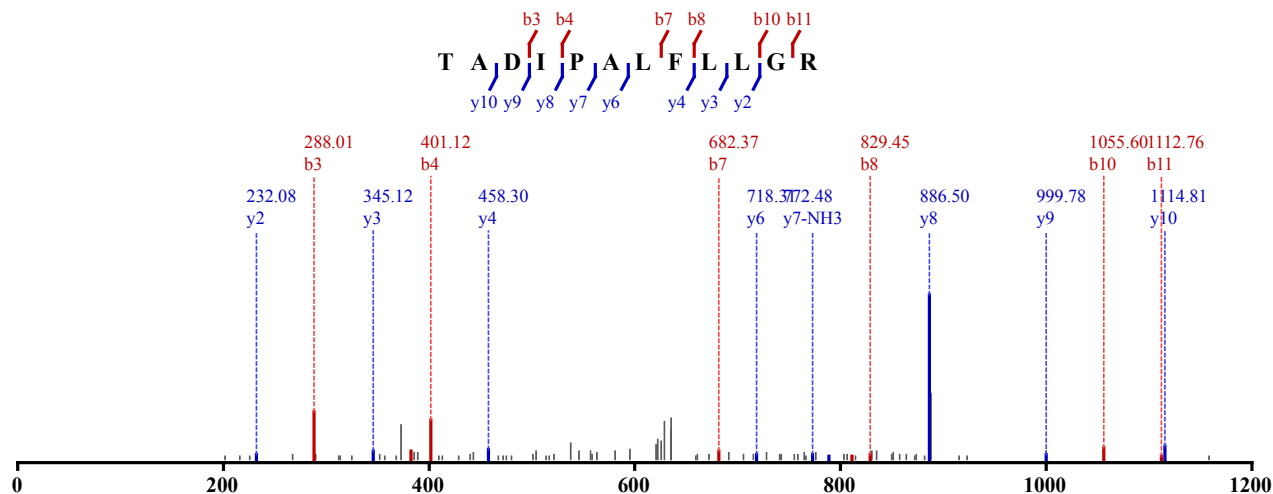

Not Modified  
 Identified in MSS480 with qvalue 0.00  
 Charge: 2, Exp. m/z: 643.876, Calc. m/z: 643.877  
 Data File: HeLa\_try\_pH4\_CID\_3xload, Scans: 42251 - 42251

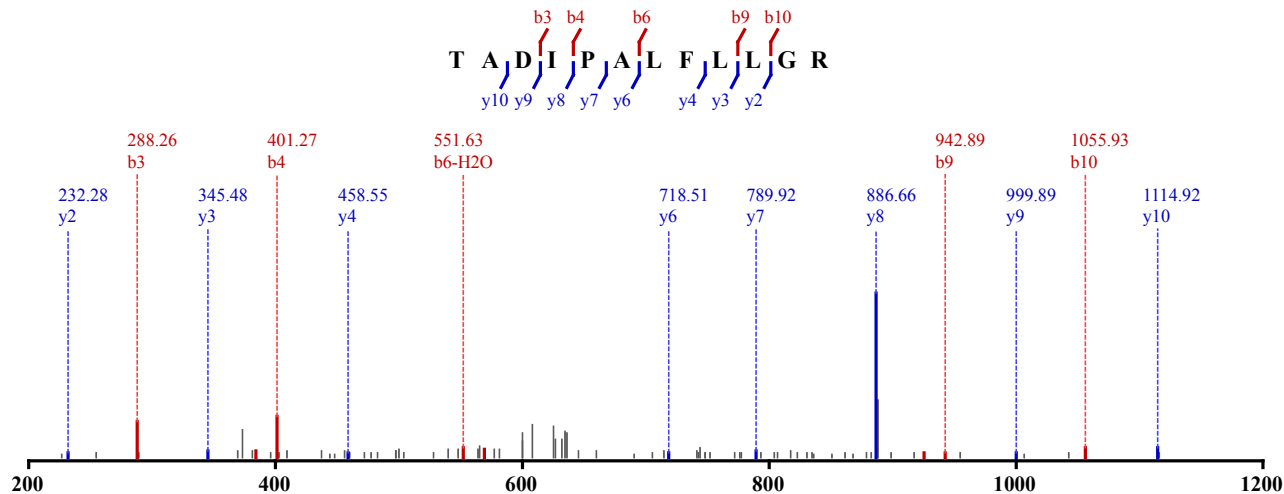

Not Modified  
 Identified in MSS480 with qvalue 0.00  
 Charge: 2, Exp. m/z: 643.879, Calc. m/z: 643.877



Data File: HeLa\_try\_pH5\_CID\_3xload\_2, Scans: 48775 - 48775

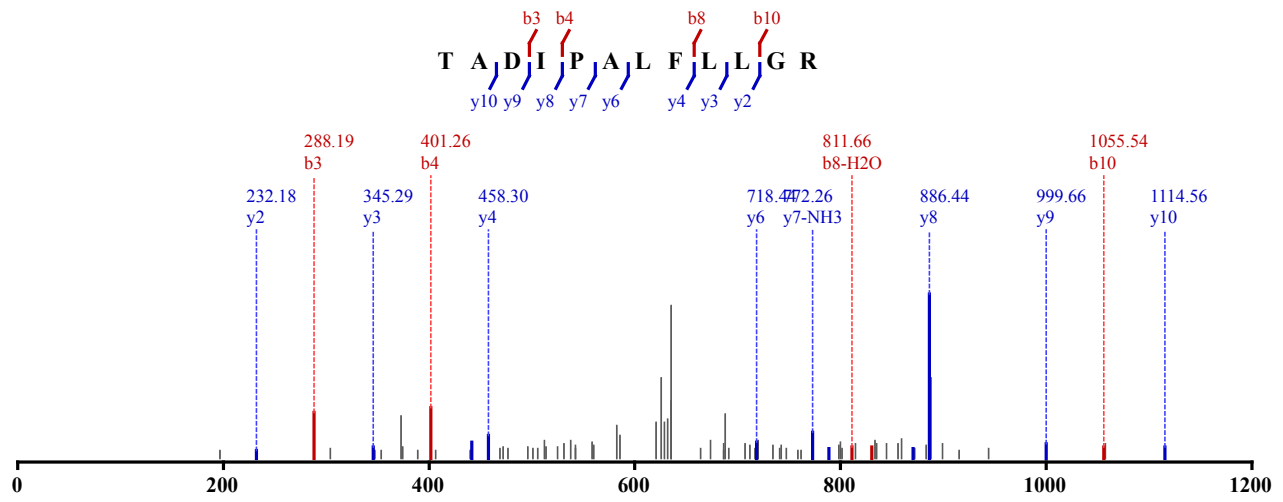

Not Modified

Identified in MSS480 with qvalue 0.00

Charge: 2, Exp. m/z: 643.877, Calc. m/z: 643.877

Data File: HeLa\_try\_pH5\_CID\_3xload\_2, Scans: 48828 - 48828

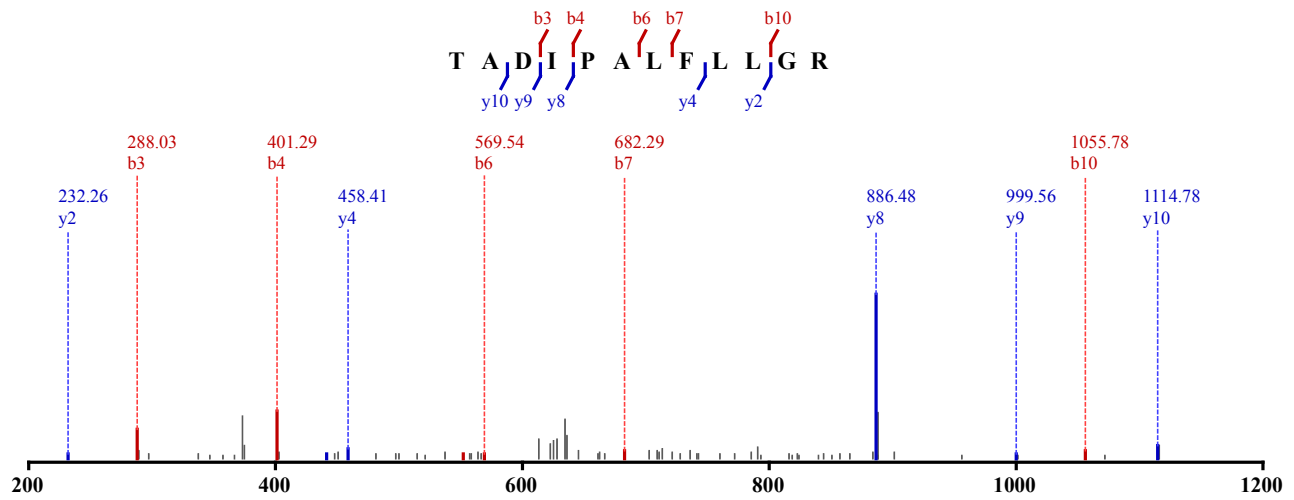

Not Modified

Identified in MSS480 with qvalue 0.00

Charge: 2, Exp. m/z: 643.878, Calc. m/z: 643.877

Data File: HeLa\_try\_pH5\_CID\_3xload\_3, Scans: 48107 - 48107

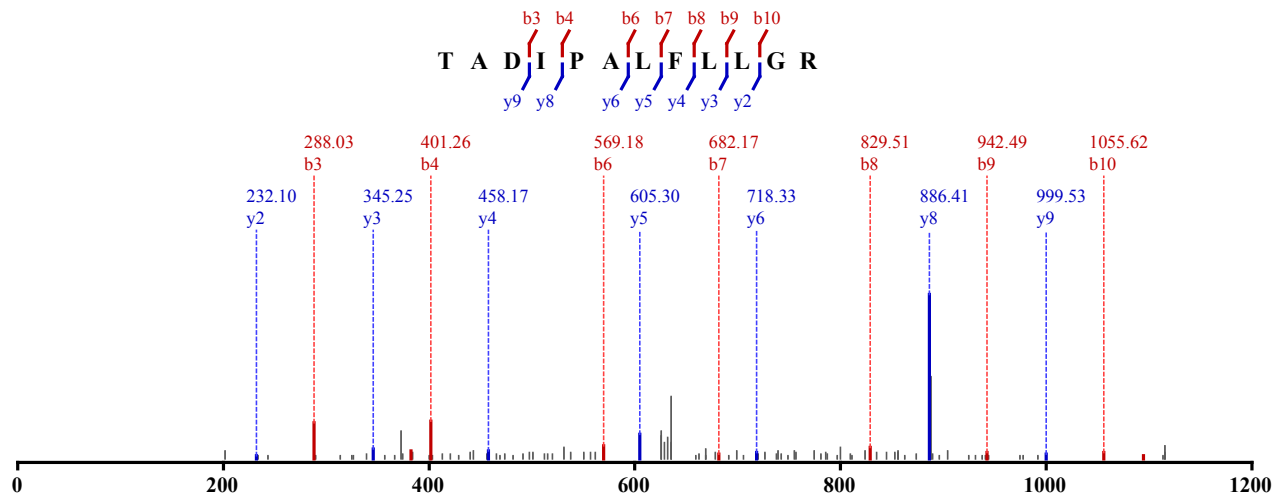

Not Modified

Identified in MSS480 with qvalue 0.00  
 Charge: 2, Exp. m/z: 643.876, Calc. m/z: 643.877  
 Data File: HeLa\_try\_pH5\_CID\_3xload, Scans: 45412 - 45412

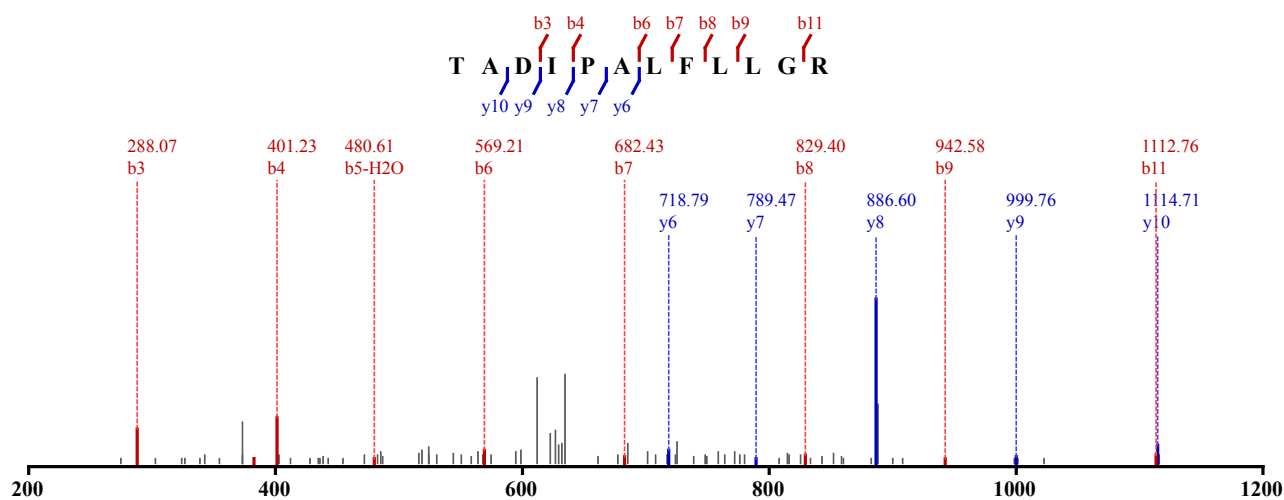

1 x Oxidation (M)

Identified in MSS480 with qvalue 0.00  
 Charge: 3, Exp. m/z: 683.987, Calc. m/z: 683.984  
 Data File: HeLa\_try\_80pcACN\_CID\_3xload\_2, Scans: 18662 - 18662

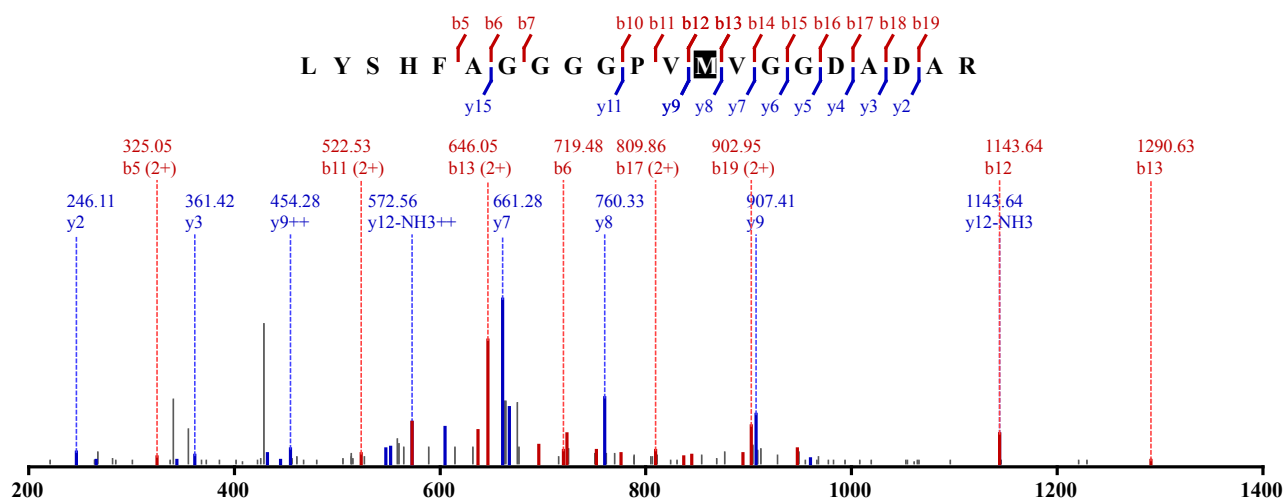

1 x Oxidation (M)

Identified in MSS484 with qvalue 0.00  
 Charge: 3, Exp. m/z: 683.987, Calc. m/z: 683.987  
 Data File: HeLa\_Try\_80pcACN\_HCD\_1, Scans: 27281 - 27281

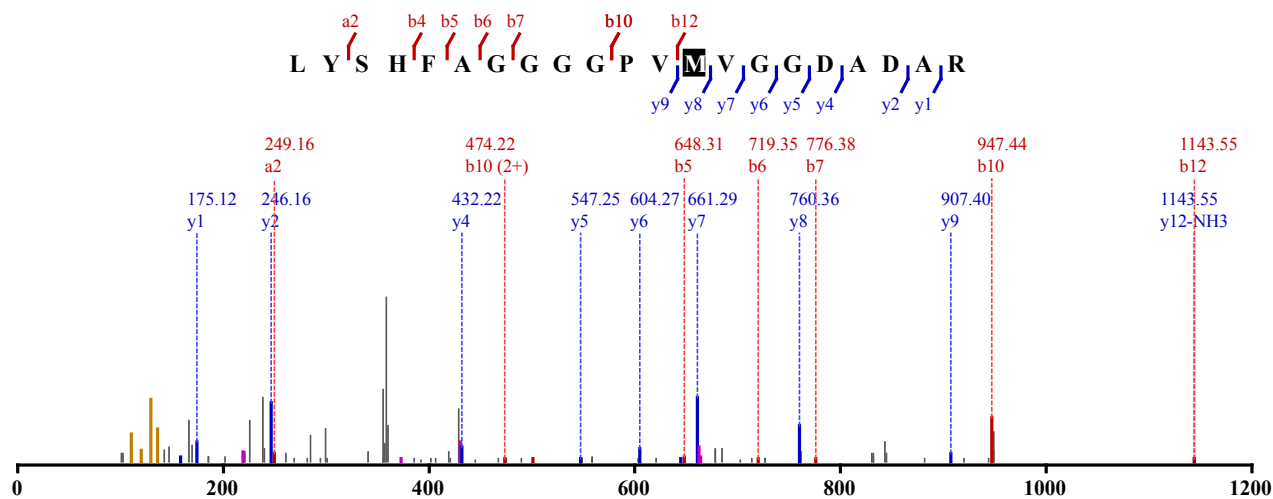

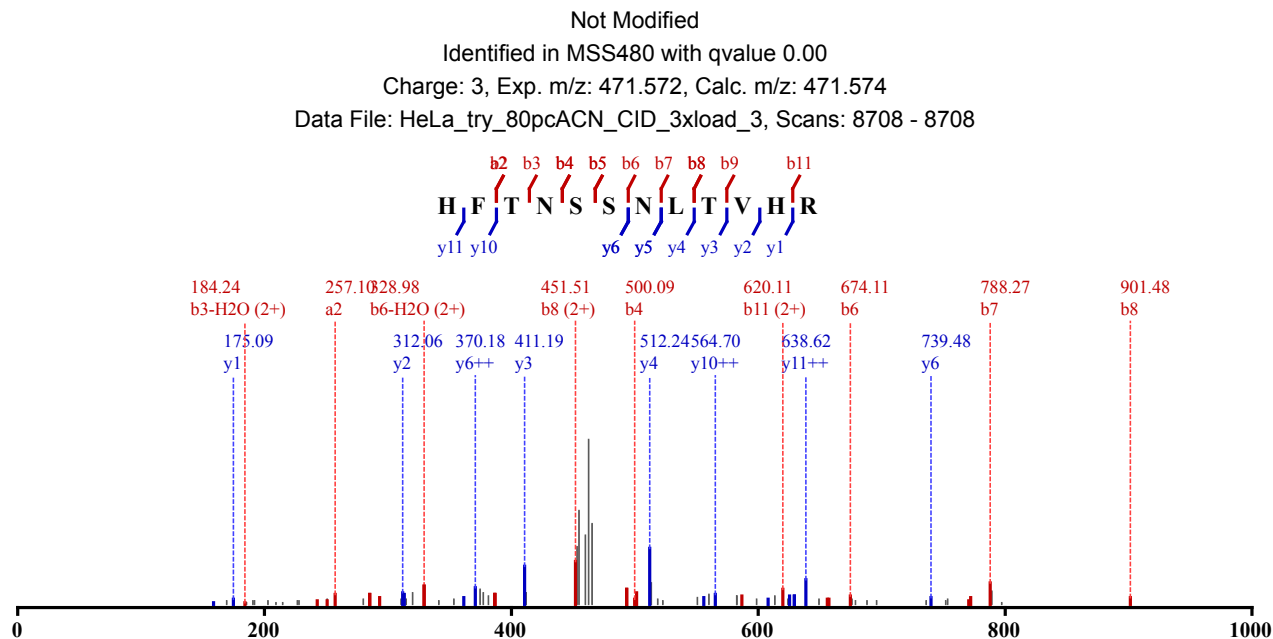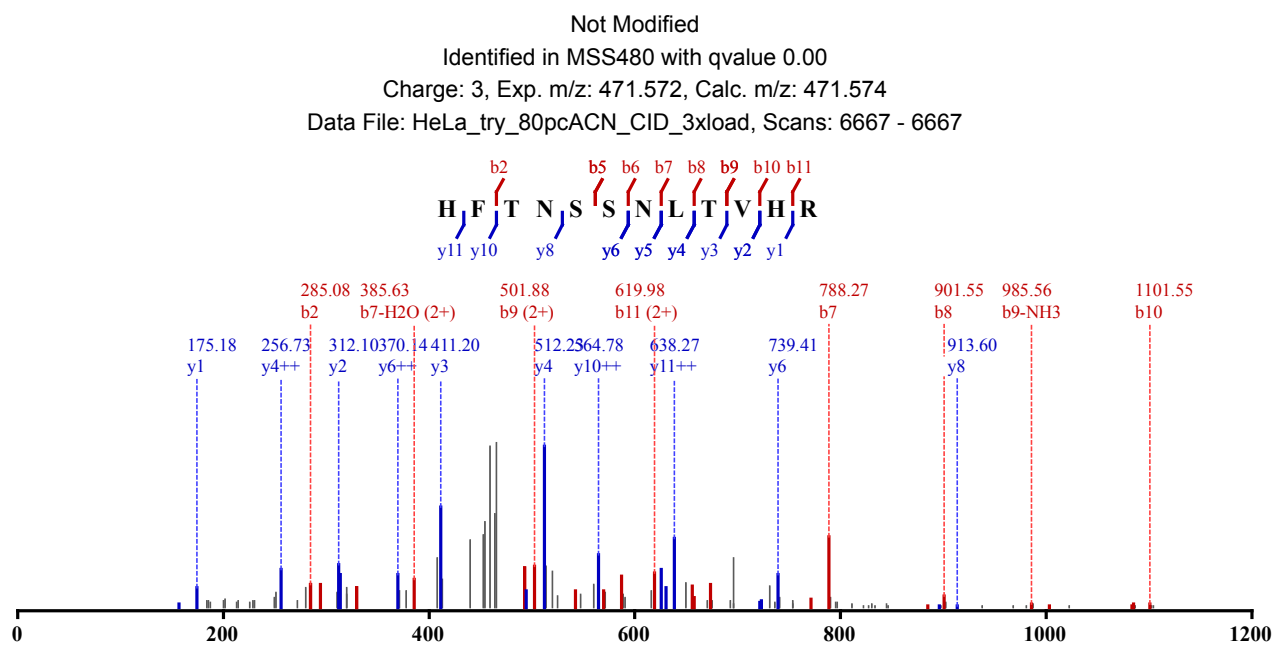

Not Modified  
 Identified in MSS479 with qvalue 0.00  
 Charge: 4, Exp. m/z: 616.299, Calc. m/z: 616.300  
 Data File: HeLa\_AspN\_pH3\_HCD\_1, Scans: 34453 - 34453

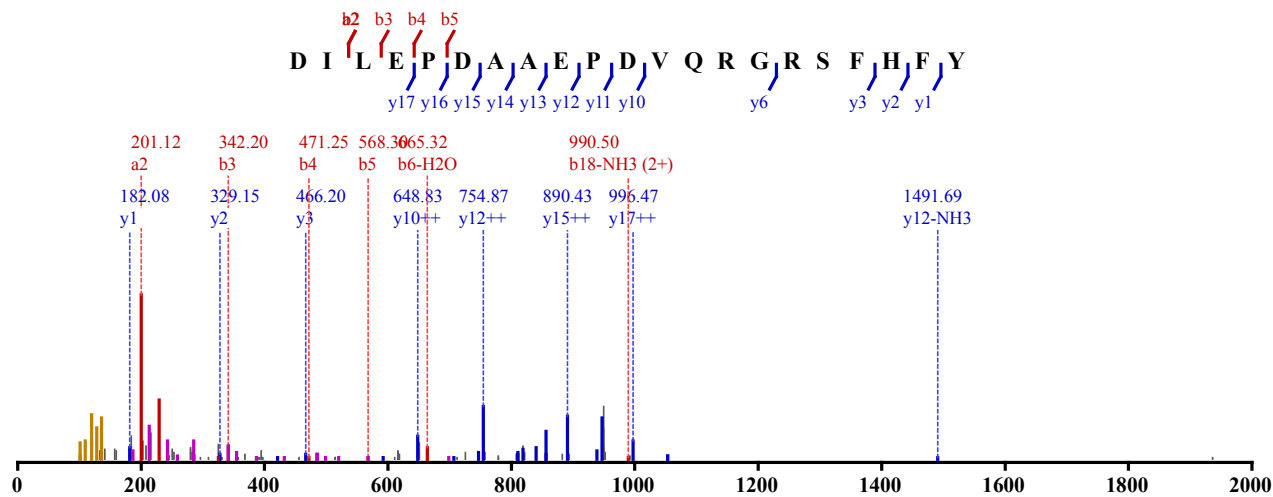

Not Modified  
 Identified in MSS479 with qvalue 0.00  
 Charge: 4, Exp. m/z: 616.300, Calc. m/z: 616.300  
 Data File: HeLa\_AspN\_pH3\_HCD\_3, Scans: 34160 - 34160

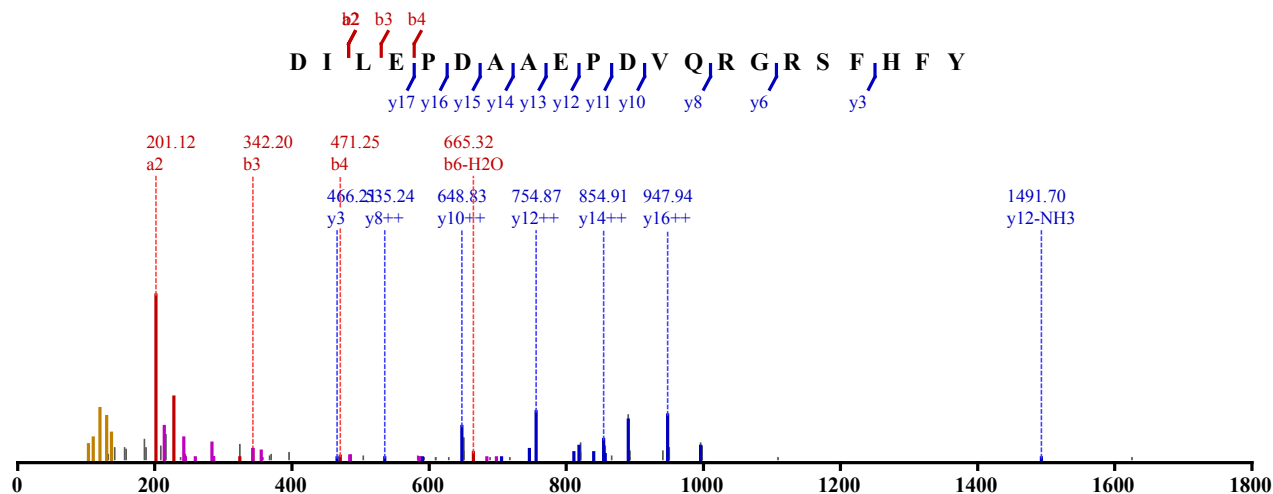

Not Modified  
 Identified in MSS479 with qvalue 0.00  
 Charge: 3, Exp. m/z: 821.395, Calc. m/z: 821.397  
 Data File: HeLa\_AspN\_pH3\_HCD\_3, Scans: 34170 - 34170

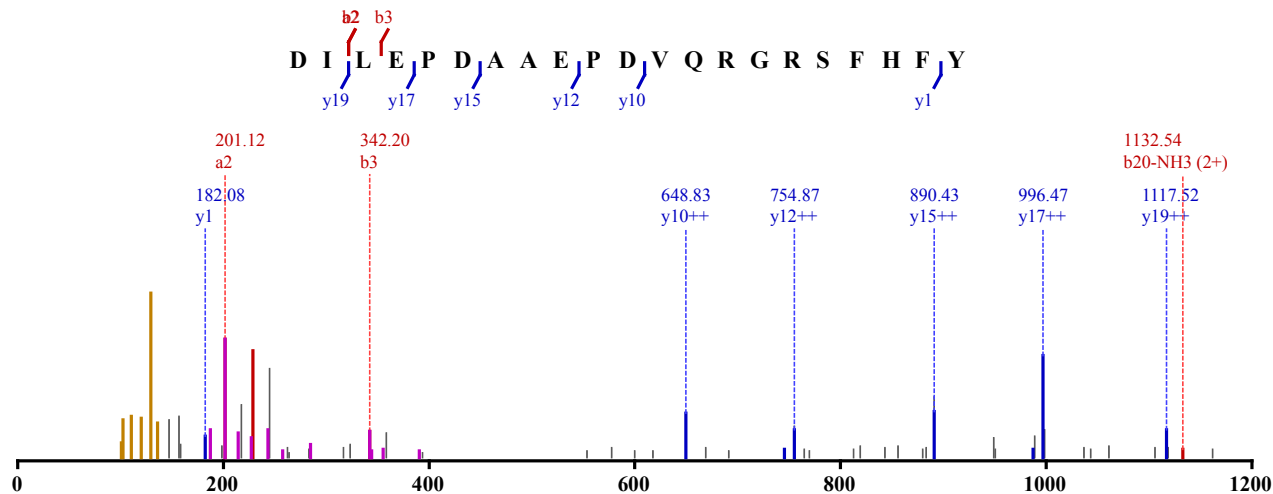

Not Modified  
 Identified in MSS30 with qvalue 0.00  
 Charge: 2, Exp. m/z: 675.845, Calc. m/z: 675.847

Data File: 20100611\_Velos1-TaGe\_SA\_Hela\_5, Scans: 15662 - 15662

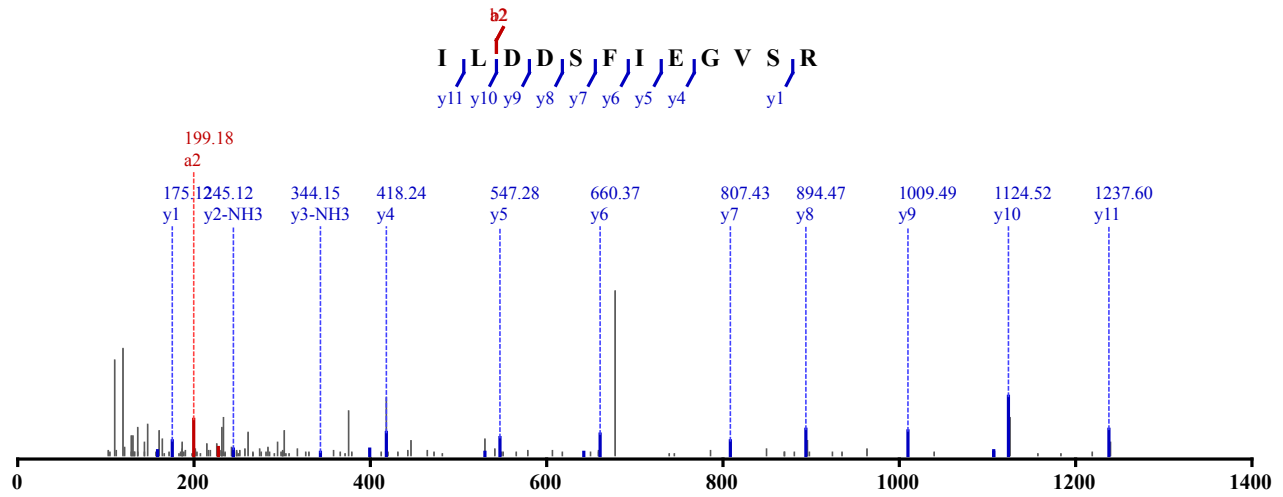

Not Modified

Identified in MSS30 with qvalue 0.00

Charge: 2, Exp. m/z: 675.851, Calc. m/z: 675.847

Data File: 20101224\_Velos1-TaGe\_SA\_HeLa\_04, Scans: 19769 - 19769

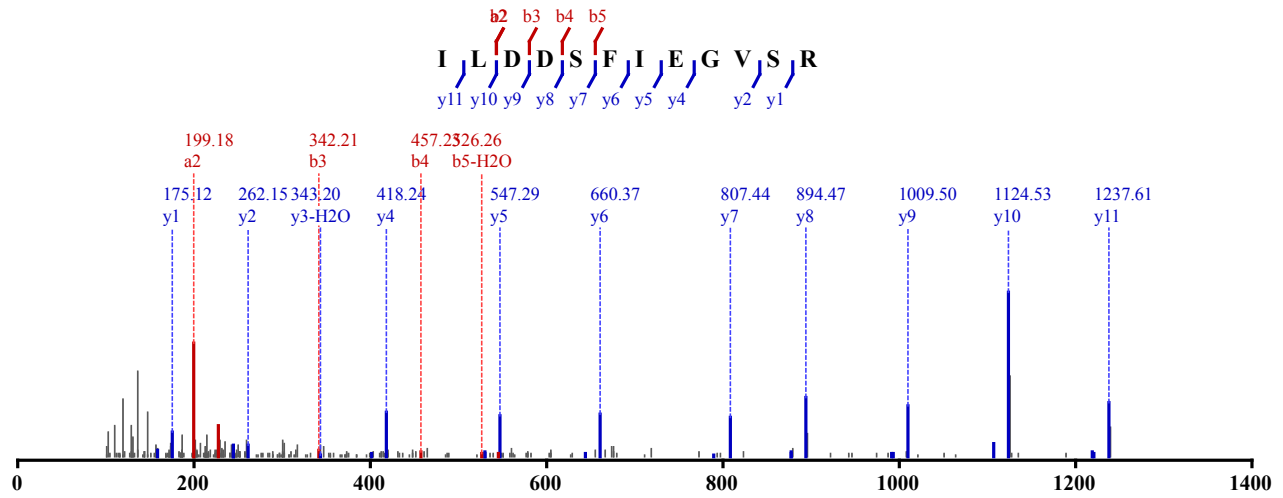

Not Modified

Identified in MSS484 with qvalue 0.00

Charge: 2, Exp. m/z: 675.849, Calc. m/z: 675.847

Data File: HeLa\_Try\_pH3\_HCD\_1, Scans: 42808 - 42808

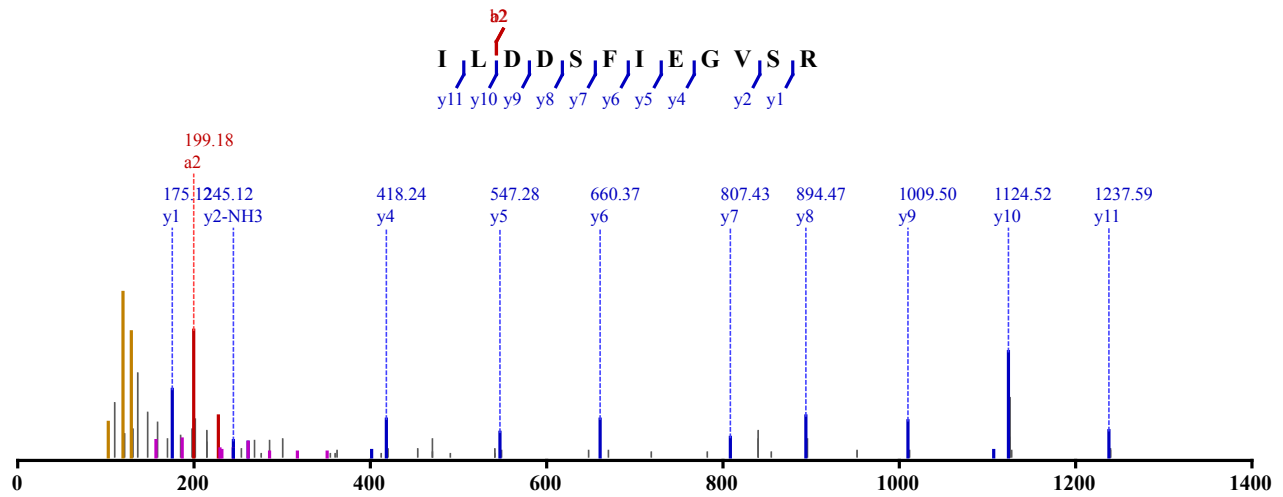

Not Modified

Identified in MSS301 with qvalue 0.01  
 Charge: 3, Exp. m/z: 495.917, Calc. m/z: 495.917  
 Data File: HeLa\_ArgC-Try\_HCD\_1, Scans: 25155 - 25155

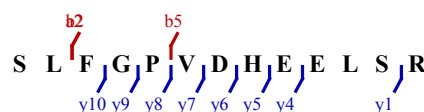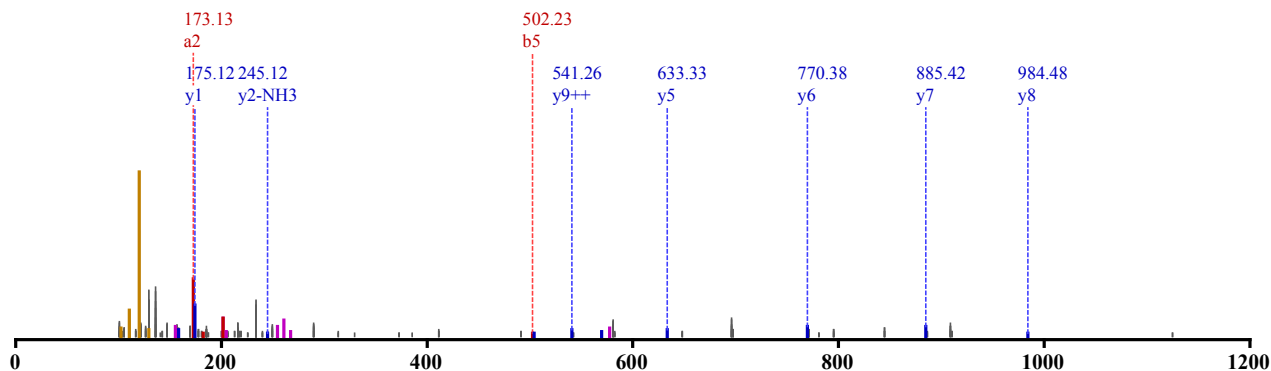

Not Modified

Identified in MSS484 with qvalue 0.00  
 Charge: 3, Exp. m/z: 495.916, Calc. m/z: 495.917  
 Data File: HeLa\_Try\_pH5\_HCD\_3, Scans: 26829 - 26829

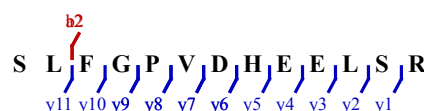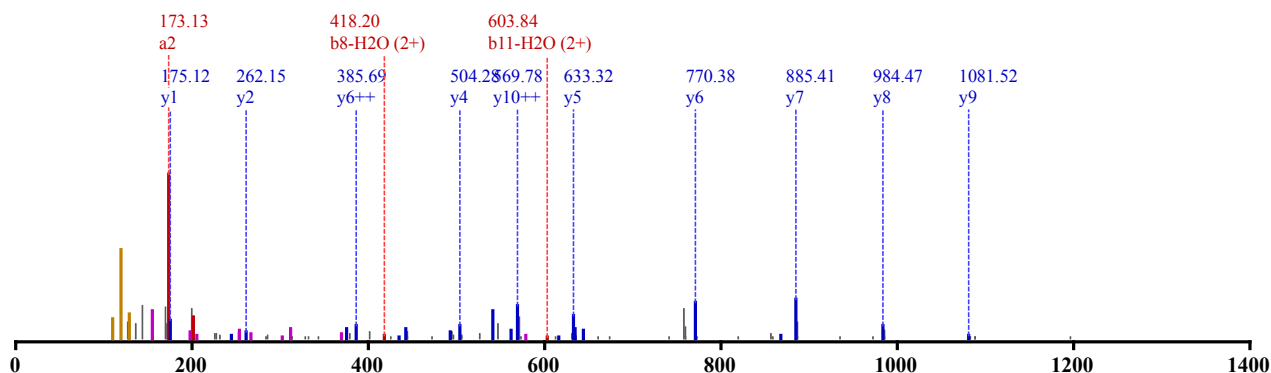

Not Modified

Identified in MSS483 with qvalue 0.00  
 Charge: 2, Exp. m/z: 928.017, Calc. m/z: 928.012  
 Data File: HeLa\_AspN\_80pcACN\_CID\_3xload\_2, Scans: 40181 - 40181

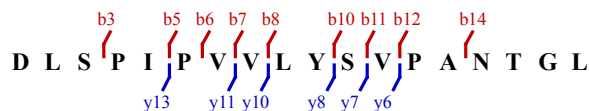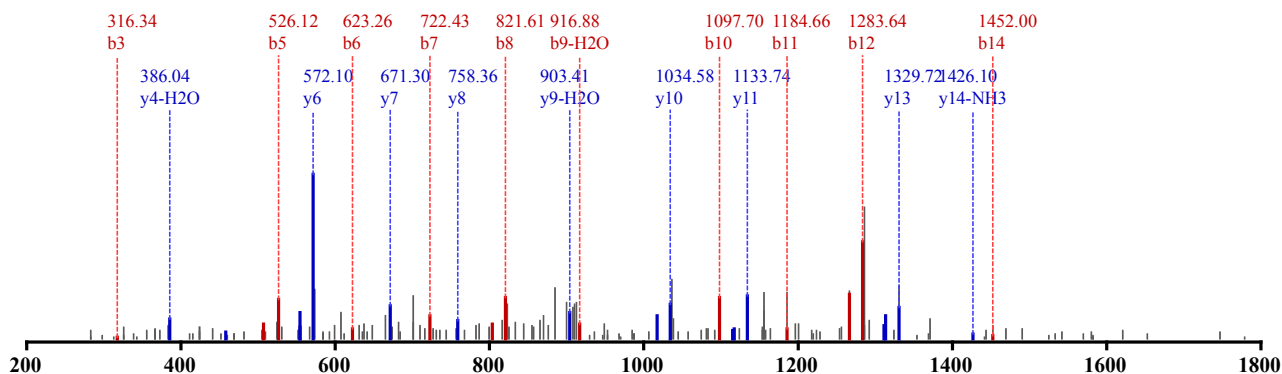

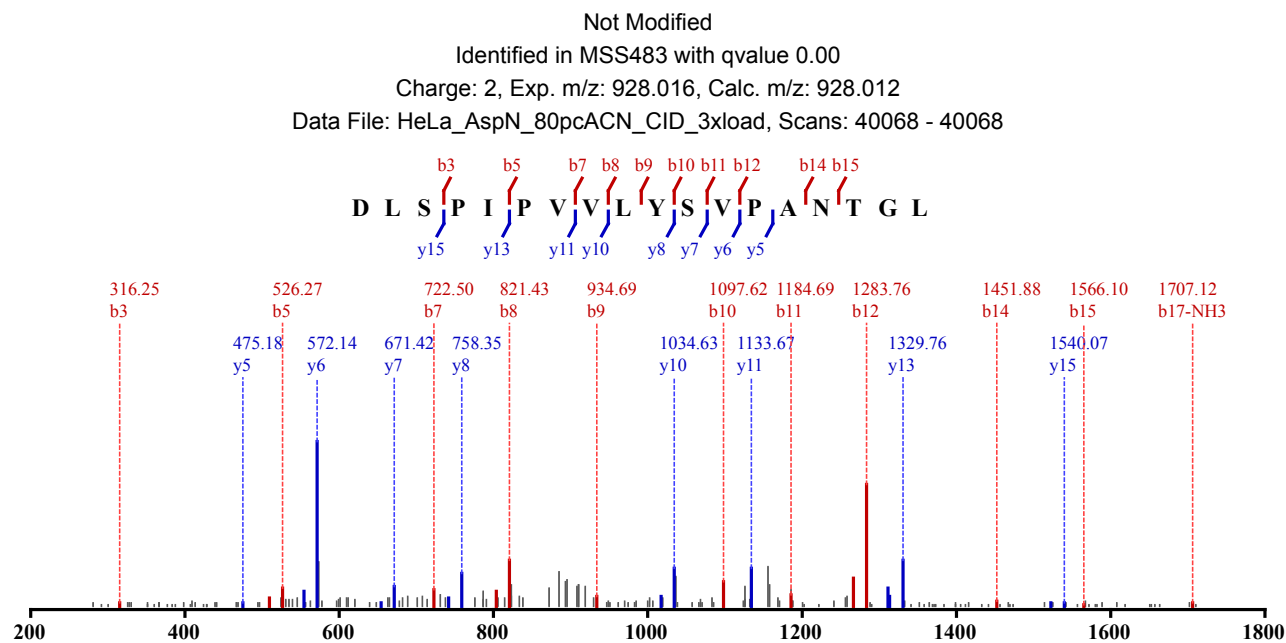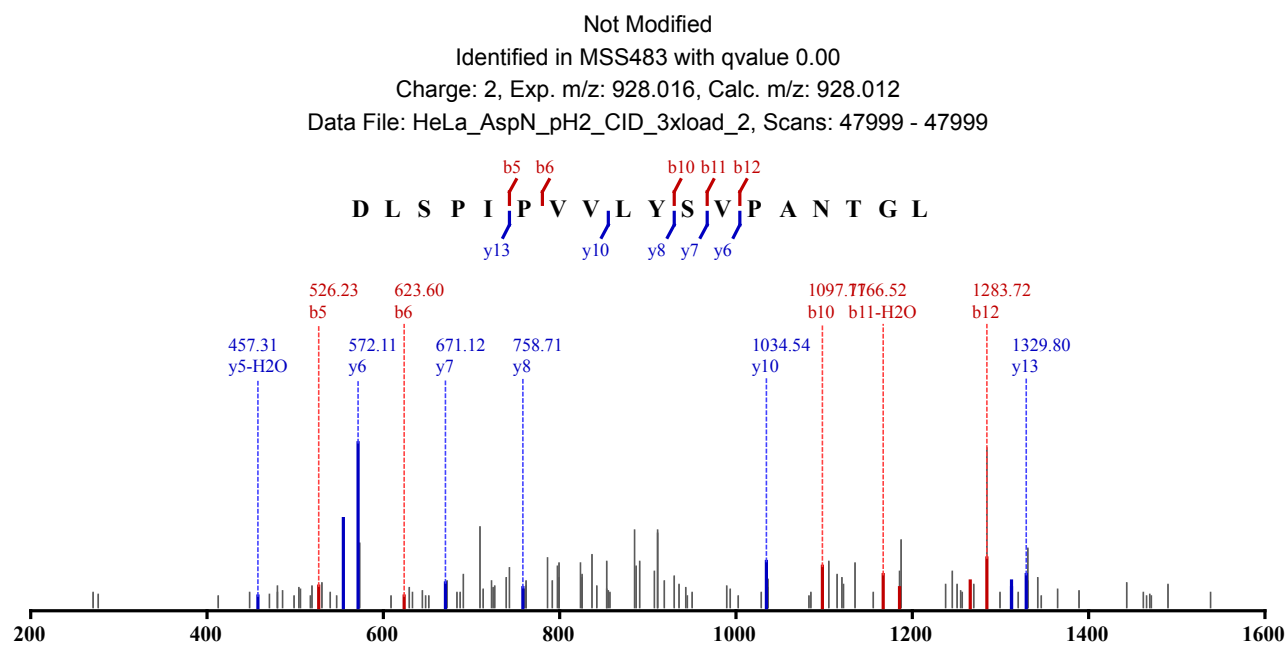

Not Modified  
 Identified in MSS128 with qvalue 0.00  
 Charge: 3, Exp. m/z: 467.526, Calc. m/z: 467.524  
 Data File: HeLa\_AspN\_HCD\_2, Scans: 8111 - 8111

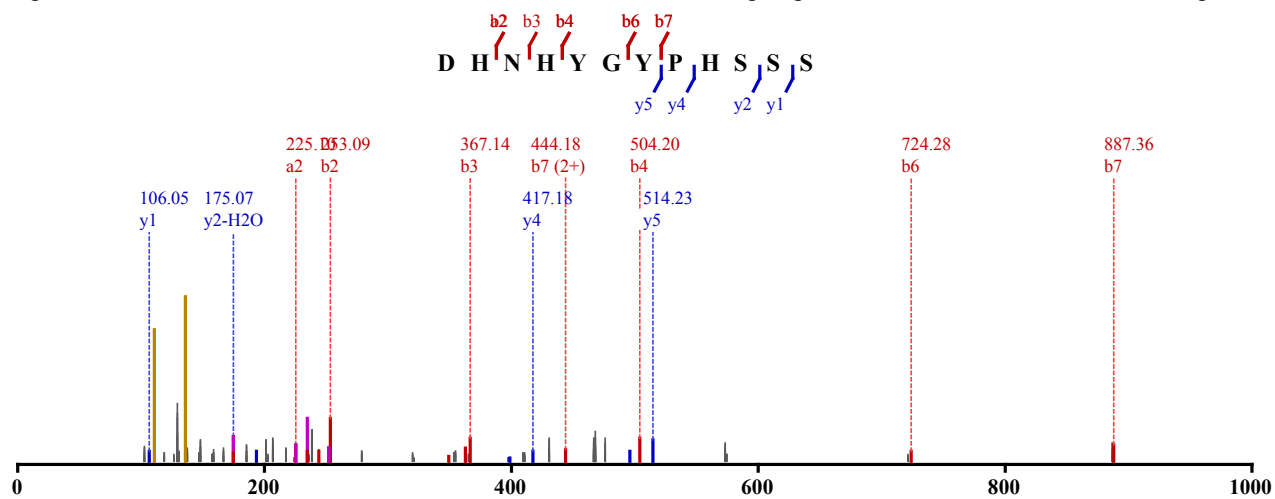

Not Modified

Identified in MSS128 with qvalue 0.00

Charge: 3, Exp. m/z: 467.525, Calc. m/z: 467.524

Data File: HeLa\_AspN\_HCD\_1, Scans: 8043 - 8043

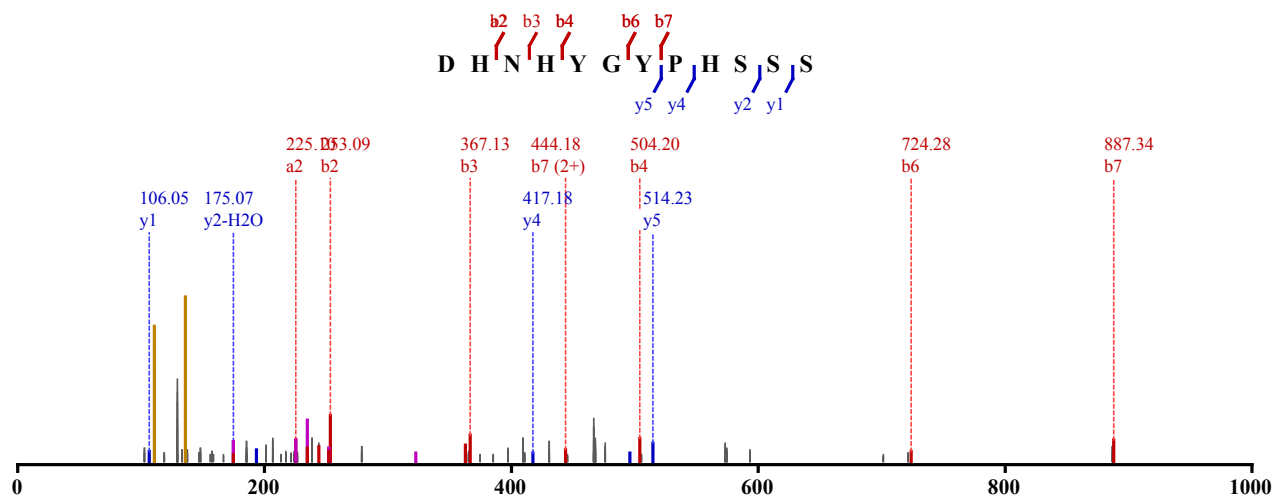

Not Modified

Identified in MSS479 with qvalue 0.00

Charge: 3, Exp. m/z: 467.525, Calc. m/z: 467.524

Data File: HeLa\_AspN\_pH5\_HCD\_1, Scans: 6646 - 6646

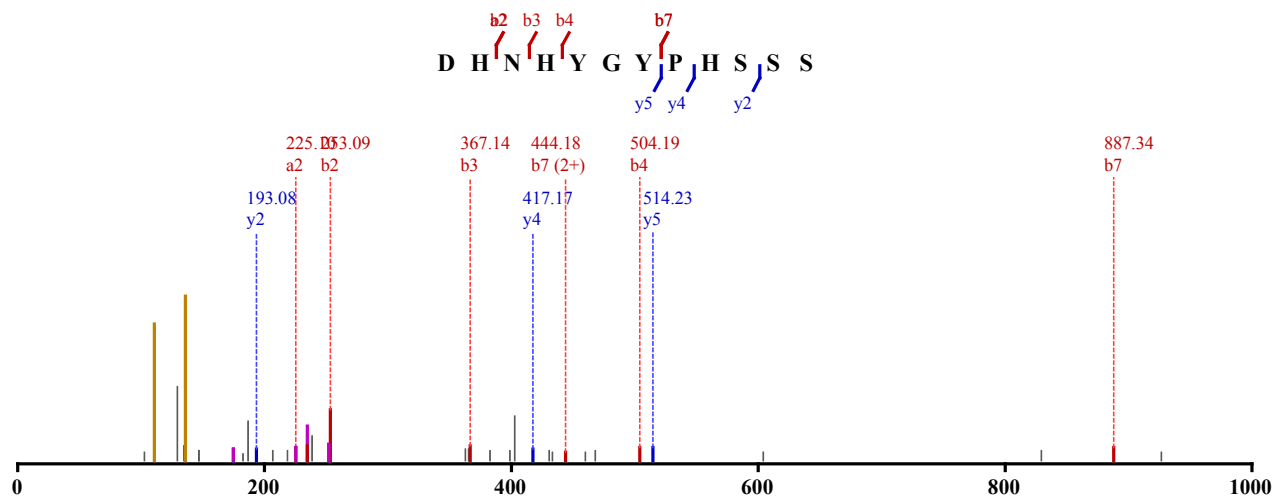

Not Modified

Identified in MSS479 with qvalue 0.00

Charge: 3, Exp. m/z: 467.526, Calc. m/z: 467.524



Data File: HeLa\_AspN\_pH6\_HCD\_1, Scans: 6724 - 6724

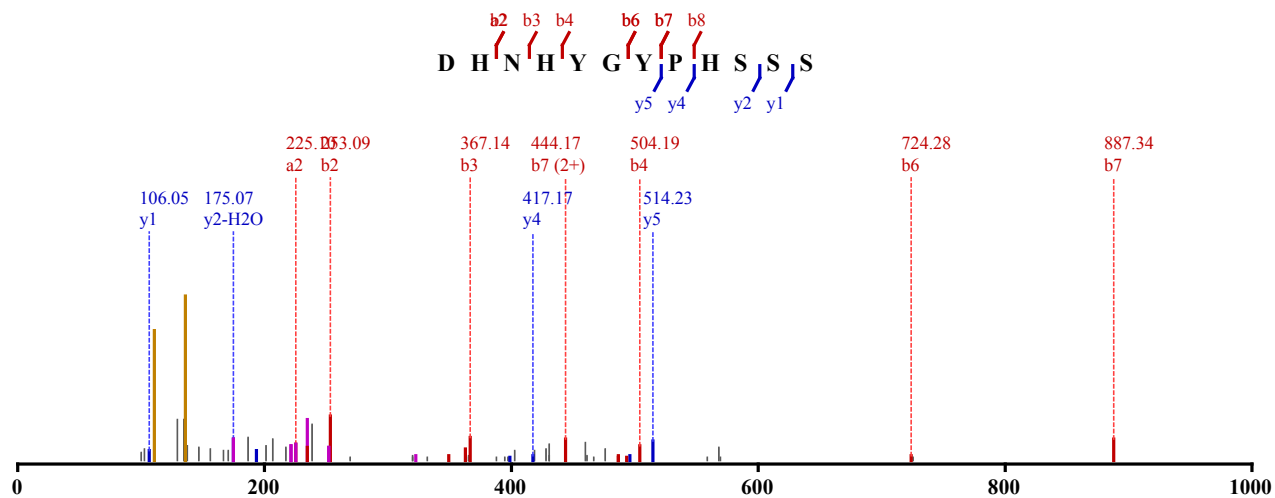

Not Modified

Identified in MSS479 with qvalue 0.00

Charge: 3, Exp. m/z: 467.526, Calc. m/z: 467.524

Data File: HeLa\_AspN\_pH6\_HCD\_3, Scans: 5708 - 5708

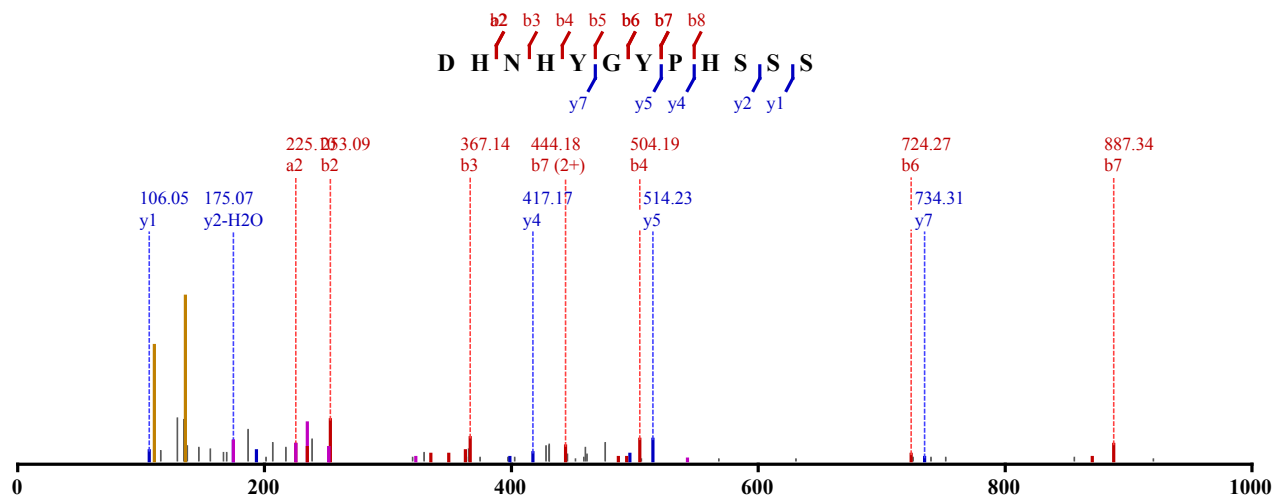

Not Modified

Identified in MSS479 with qvalue 0.00

Charge: 2, Exp. m/z: 700.784, Calc. m/z: 700.782

Data File: HeLa\_AspN\_pH6\_HCD\_1, Scans: 6743 - 6743

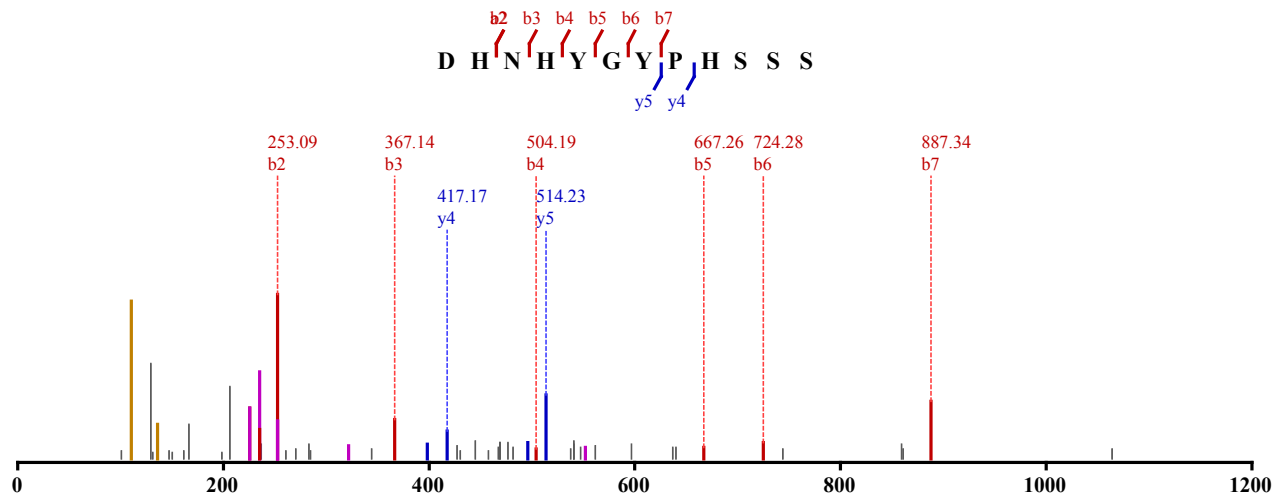

Not Modified

Identified in MSS479 with qvalue 0.00  
Charge: 3, Exp. m/z: 467.526, Calc. m/z: 467.524  
Data File: HeLa\_AspN\_pH6\_HCD\_1, Scans: 6802 - 6802

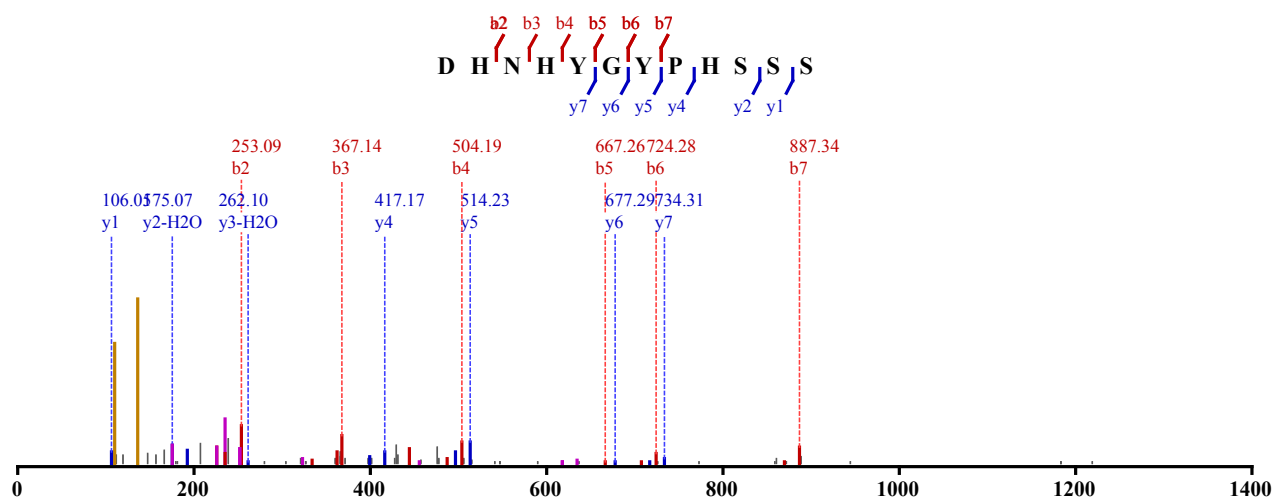

Not Modified  
Identified in MSS479 with qvalue 0.00  
Charge: 2, Exp. m/z: 700.784, Calc. m/z: 700.782  
Data File: HeLa\_AspN\_pH6\_HCD\_1, Scans: 6824 - 6824

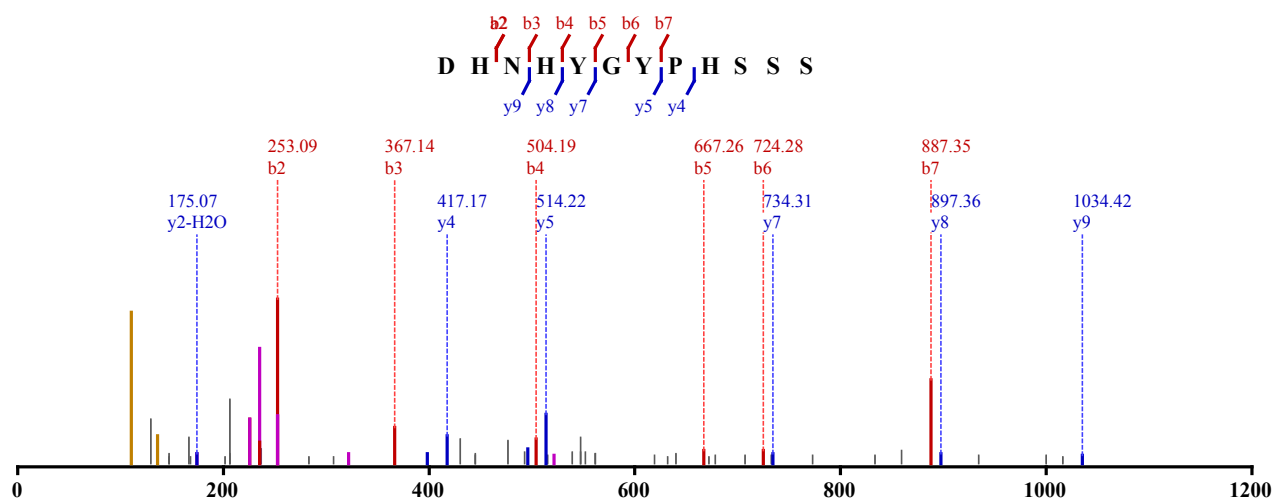

Not Modified  
Identified in MSS479 with qvalue 0.00  
Charge: 3, Exp. m/z: 467.525, Calc. m/z: 467.524  
Data File: HeLa\_AspN\_pH6\_HCD\_2, Scans: 5648 - 5648

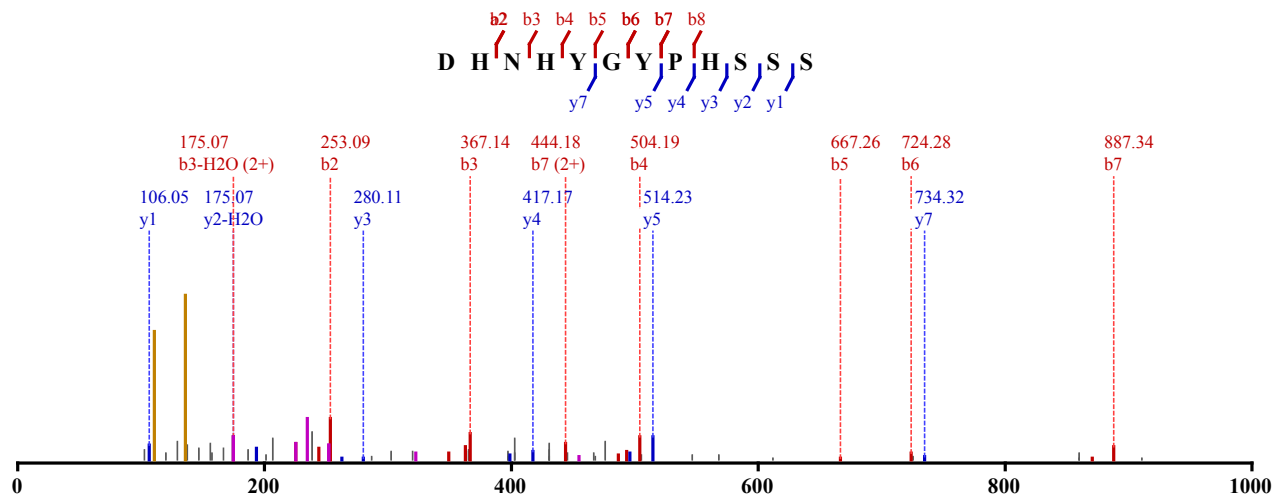

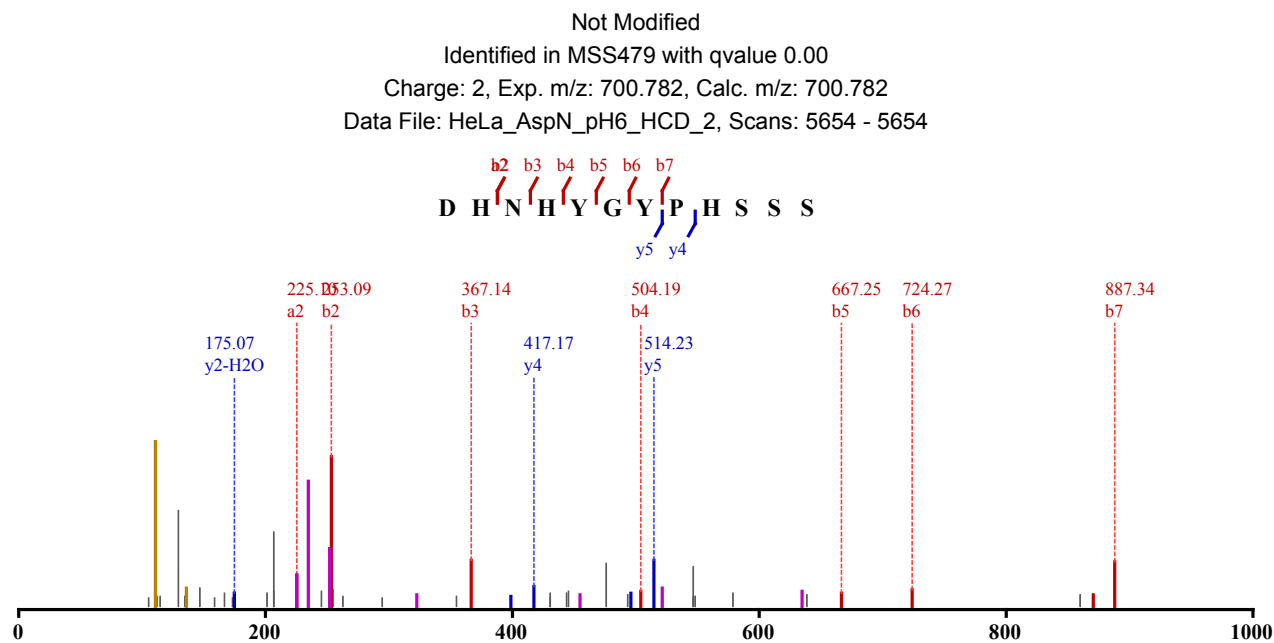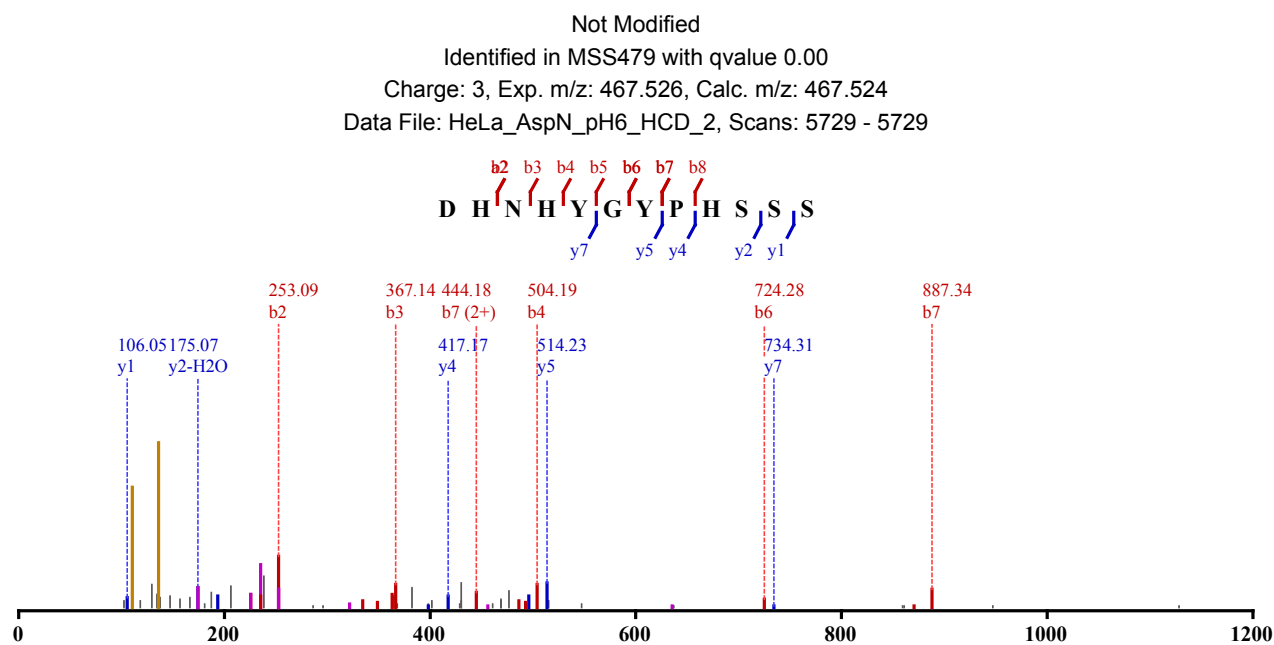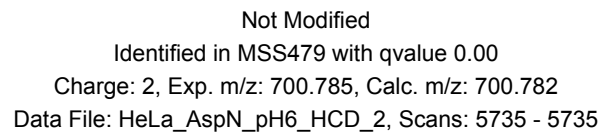

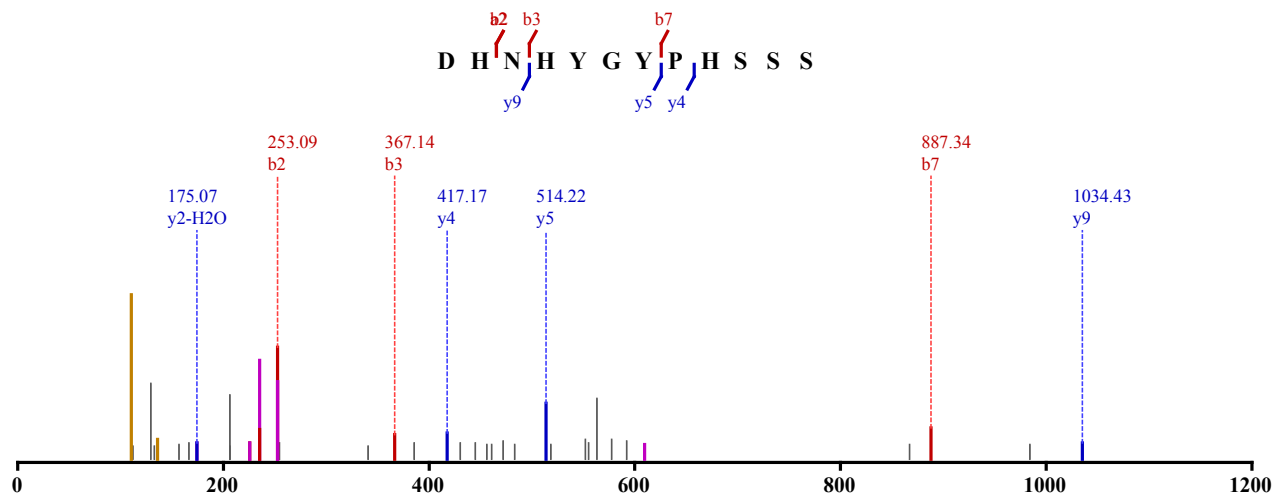

Not Modified

Identified in MSS479 with qvalue 0.00

Charge: 3, Exp. m/z: 467.525, Calc. m/z: 467.524

Data File: HeLa\_AspN\_pH6\_HCD\_3, Scans: 5629 - 5629

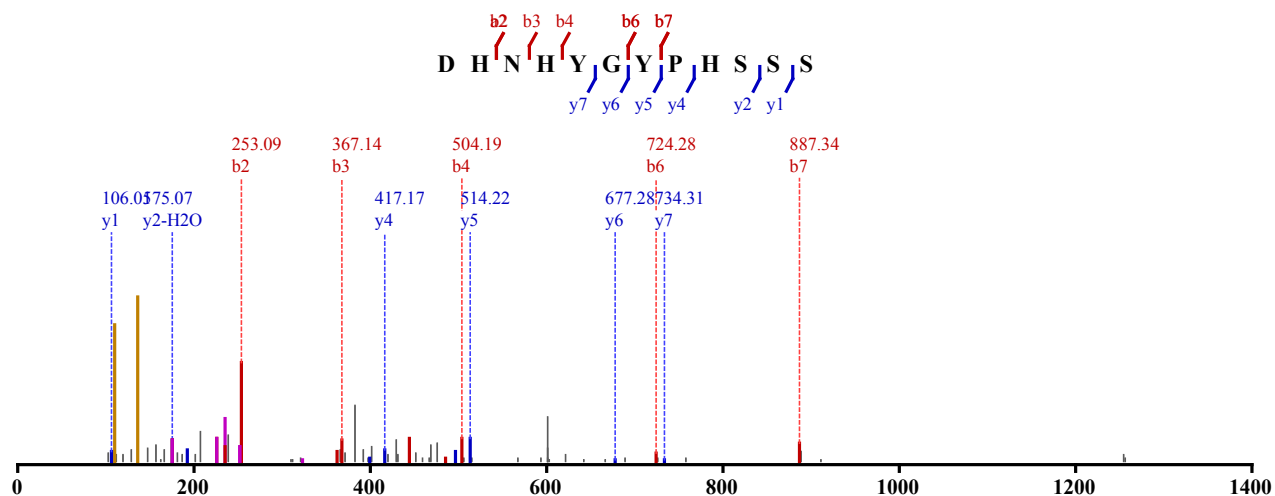

Not Modified

Identified in MSS479 with qvalue 0.00

Charge: 2, Exp. m/z: 700.784, Calc. m/z: 700.782

Data File: HeLa\_AspN\_pH6\_HCD\_3, Scans: 5630 - 5630

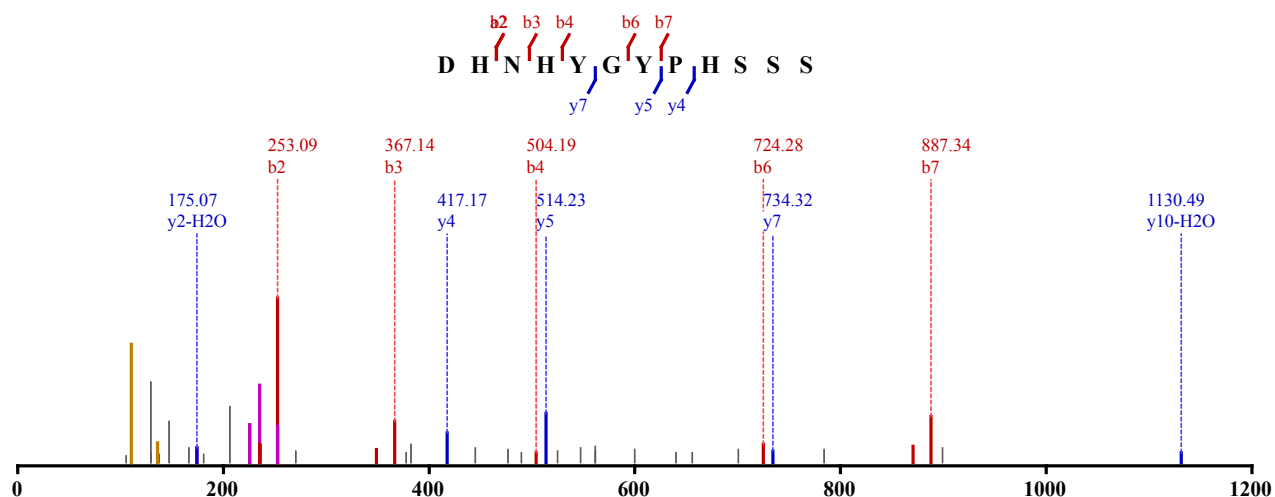

Not Modified

Identified in MSS483 with qvalue 0.01

Charge: 3, Exp. m/z: 467.525, Calc. m/z: 467.524

Data File: HeLa\_AspN\_pH8\_CID\_3xload, Scans: 4469 - 4469

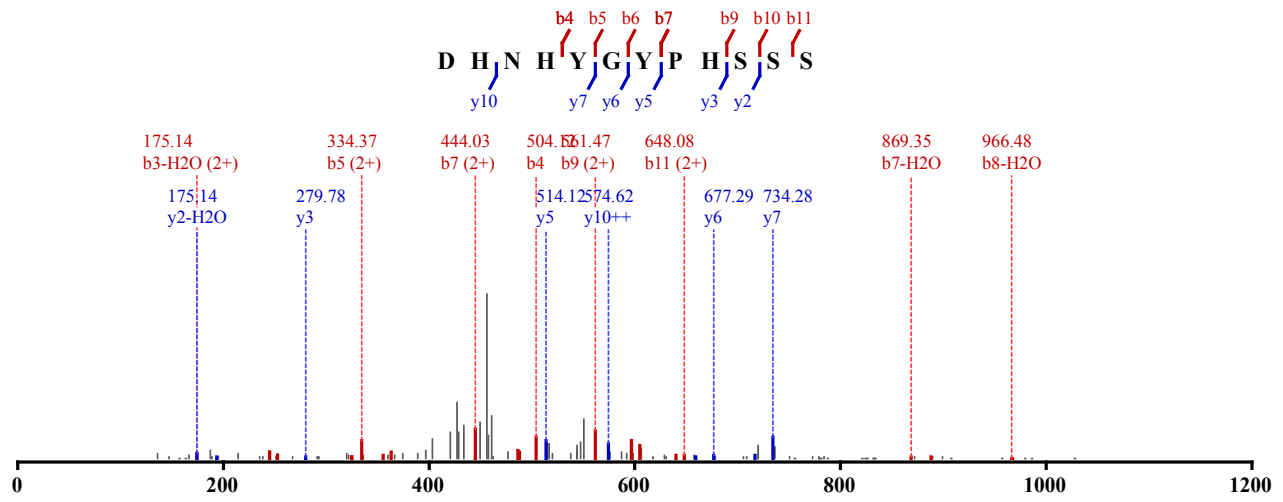

Not Modified

Identified in MSS483 with qvalue 0.00

Charge: 2, Exp. m/z: 700.785, Calc. m/z: 700.782

Data File: HeLa\_AspN\_pH8\_CID\_3xload\_2, Scans: 5376 - 5376

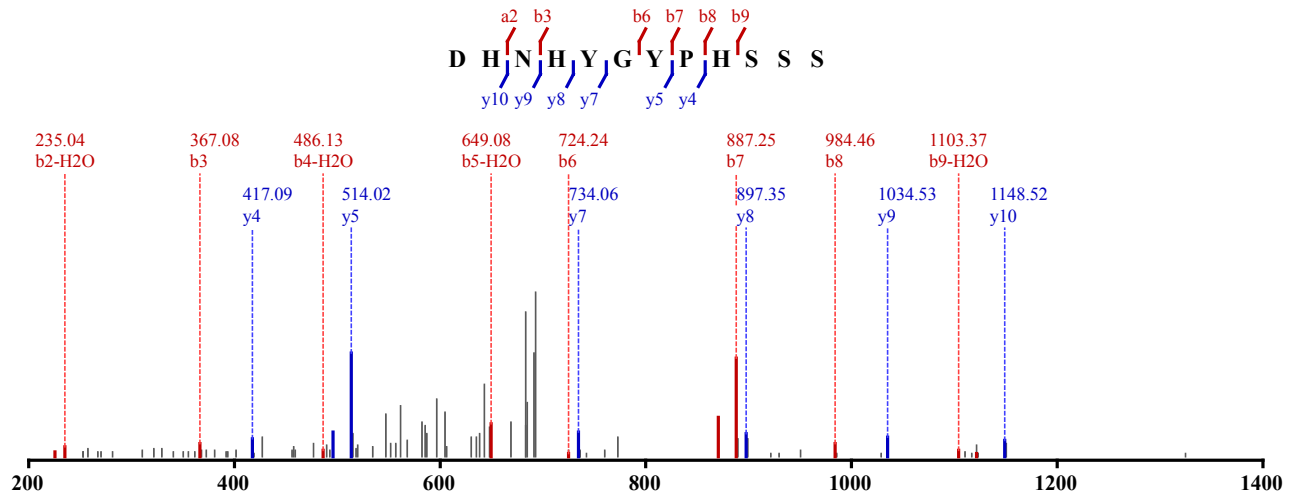

Not Modified

Identified in MSS483 with qvalue 0.00

Charge: 3, Exp. m/z: 467.525, Calc. m/z: 467.524

Data File: HeLa\_AspN\_pH8\_CID\_3xload\_2, Scans: 5418 - 5418

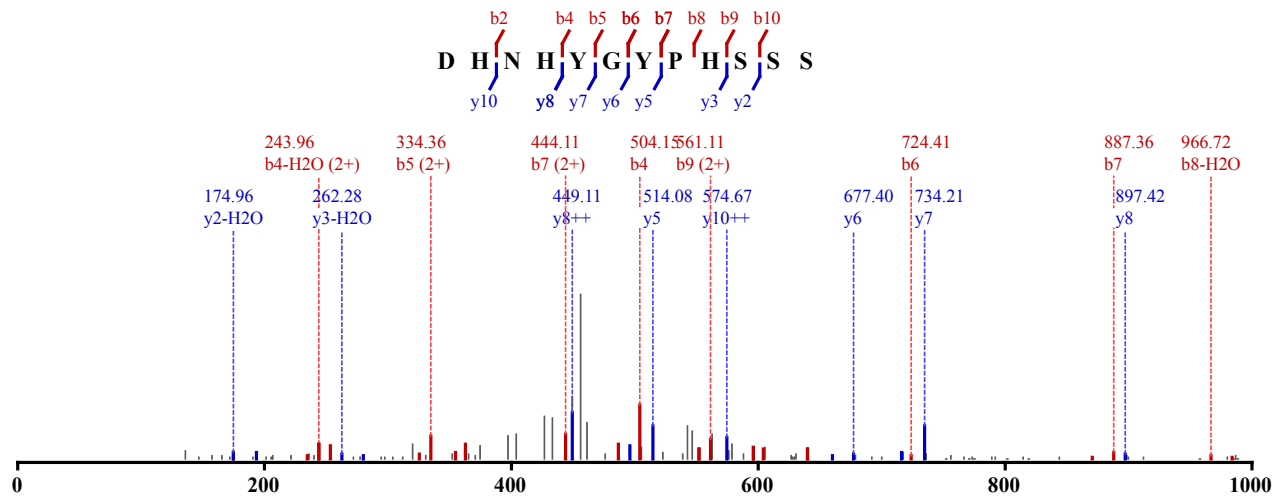

Not Modified

Identified in MSS483 with qvalue 0.00  
 Charge: 2, Exp. m/z: 700.784, Calc. m/z: 700.782  
 Data File: HeLa\_AspN\_pH8\_CID\_3xload\_2, Scans: 5451 - 5451

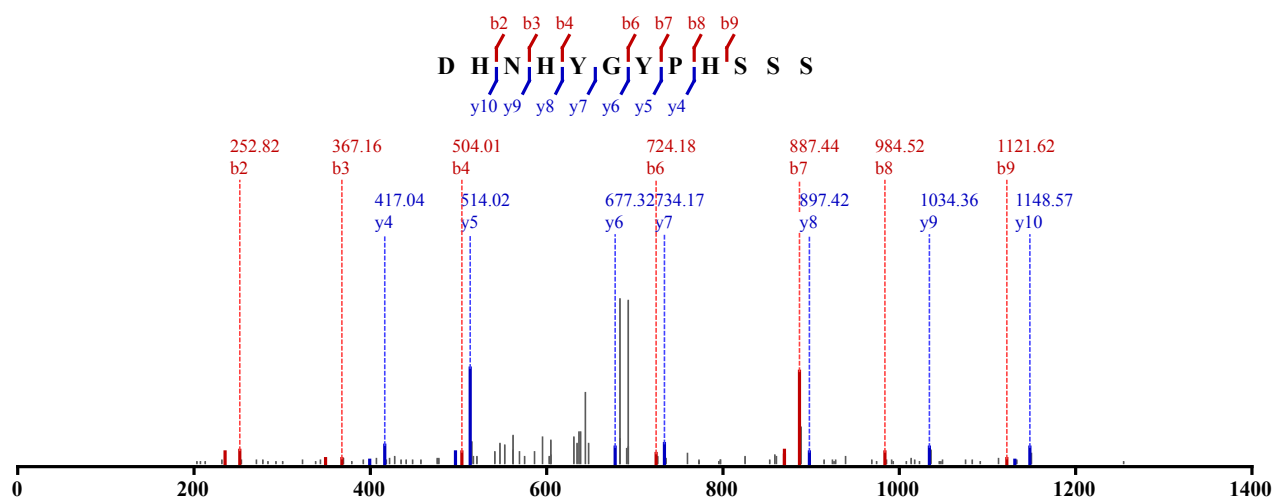

Not Modified  
 Identified in MSS483 with qvalue 0.00  
 Charge: 2, Exp. m/z: 700.783, Calc. m/z: 700.782  
 Data File: HeLa\_AspN\_pH8\_CID\_3xload\_2, Scans: 5524 - 5524

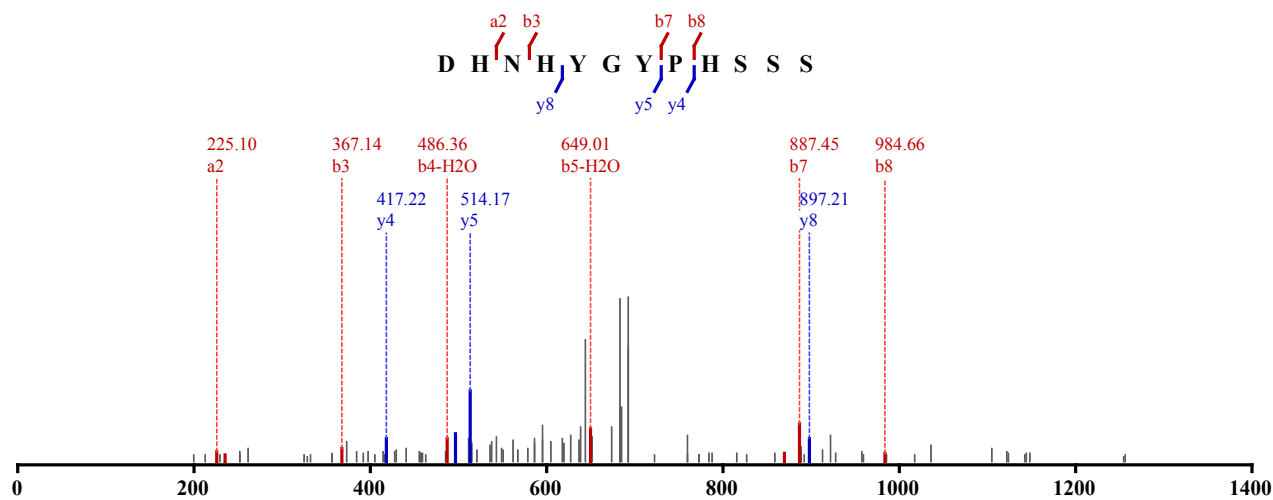

Not Modified  
 Identified in MSS483 with qvalue 0.00  
 Charge: 2, Exp. m/z: 700.785, Calc. m/z: 700.782  
 Data File: HeLa\_AspN\_pH8\_CID\_3xload, Scans: 4385 - 4385

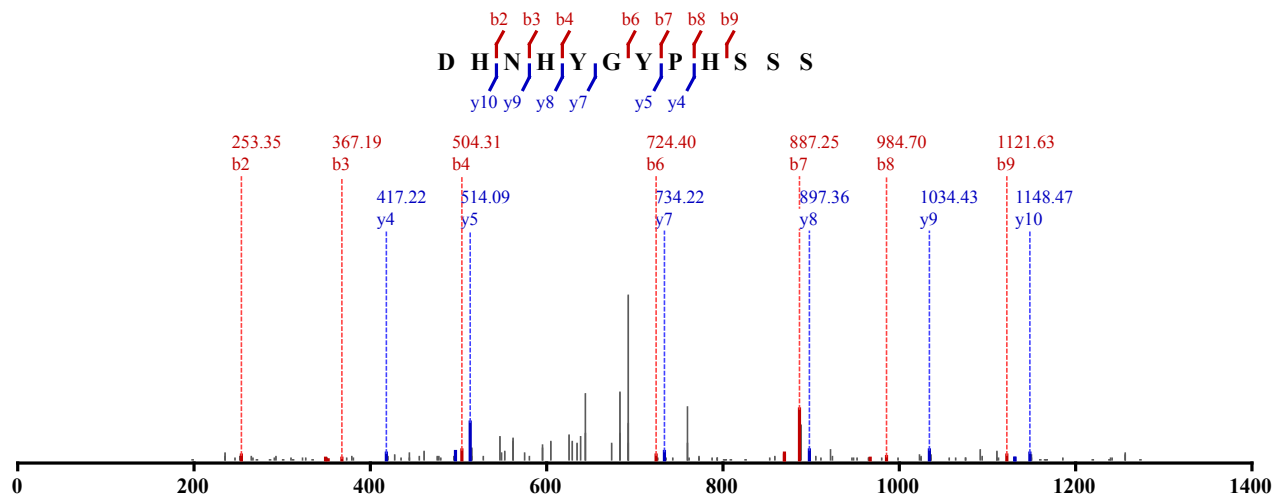

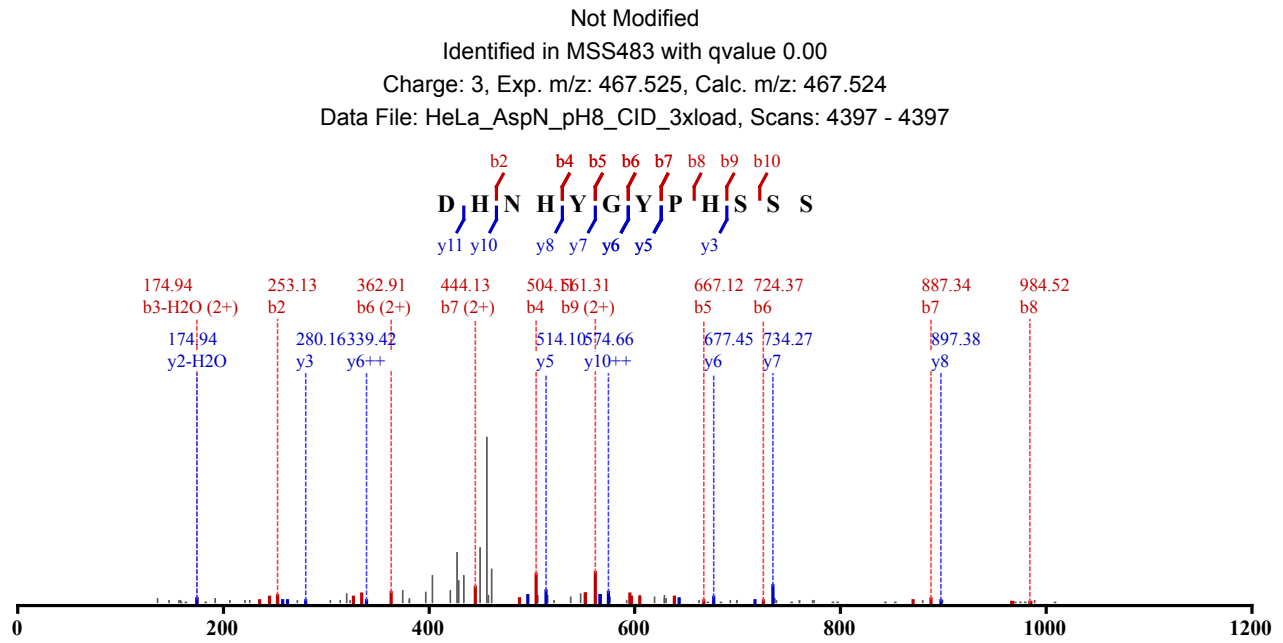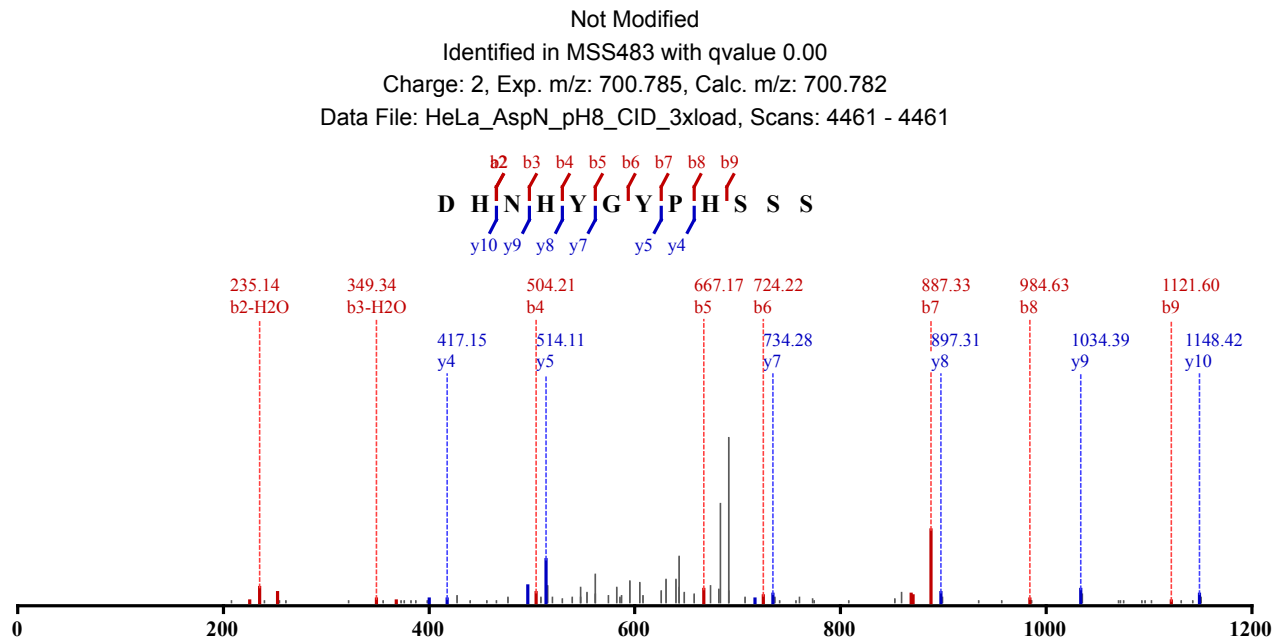

Not Modified  
 Identified in MSS487 with qvalue 0.00  
 Charge: 2, Exp. m/z: 797.895, Calc. m/z: 797.892  
 Data File: HeLa\_ArgC-Try\_pH11\_HCD\_1, Scans: 20500 - 20500

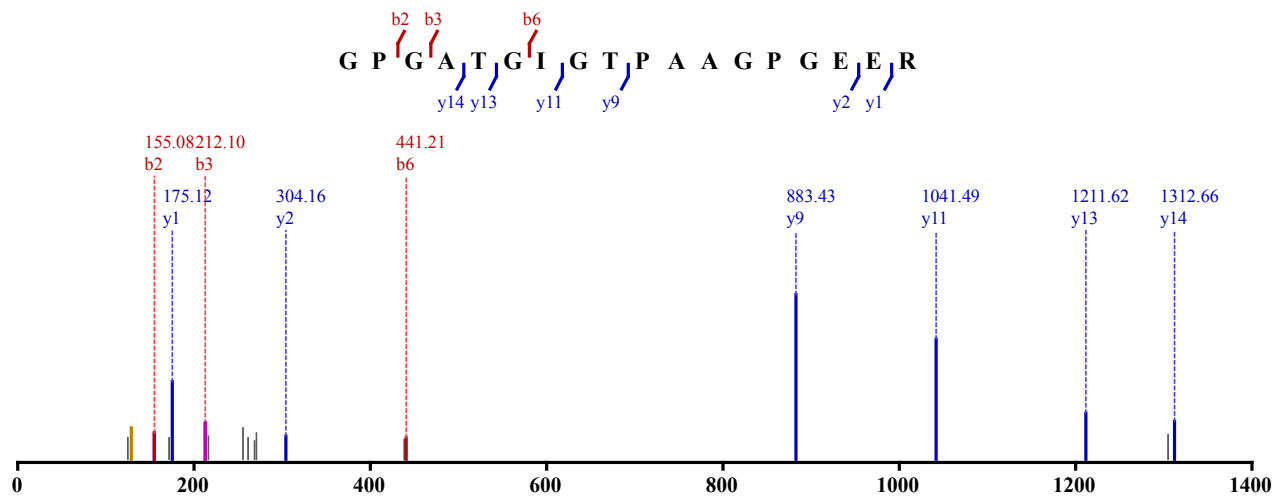

Not Modified  
 Identified in MSS79 with qvalue 0.00  
 Charge: 3, Exp. m/z: 505.641, Calc. m/z: 505.641  
 Data File: HeLa\_AspN-Try\_CID\_2, Scans: 30645 - 30645

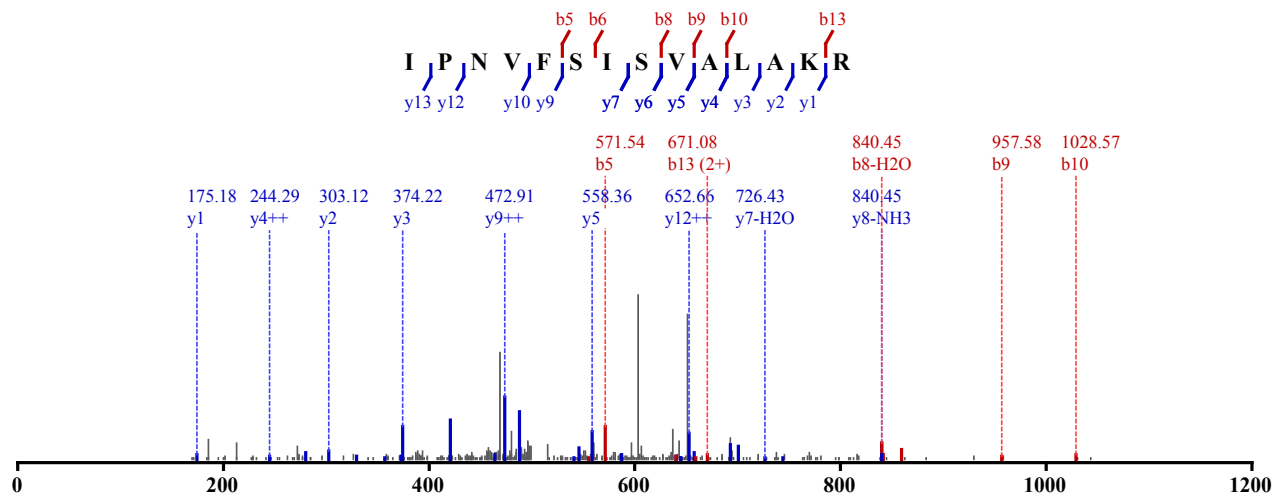

Not Modified  
 Identified in MSS255 with qvalue 0.00  
 Charge: 3, Exp. m/z: 505.641, Calc. m/z: 505.641  
 Data File: HeLa\_ArgC\_CID\_2, Scans: 21652 - 21652

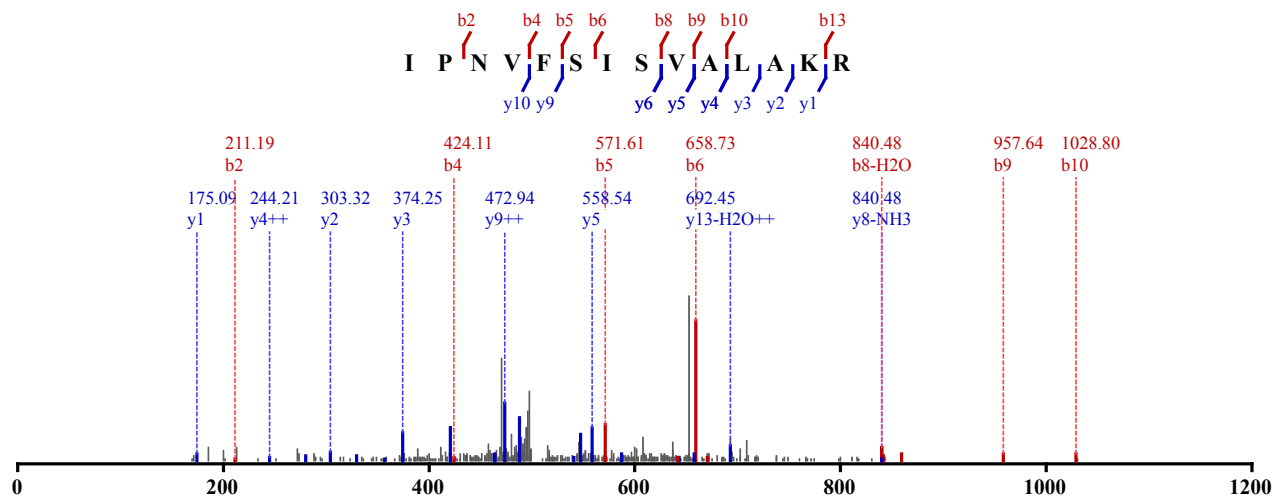

Not Modified  
 Identified in MSS259 with qvalue 0.00  
 Charge: 3, Exp. m/z: 505.641, Calc. m/z: 505.641



Data File: HeLa\_ArgC-LysC\_CID\_1, Scans: 21932 - 21932

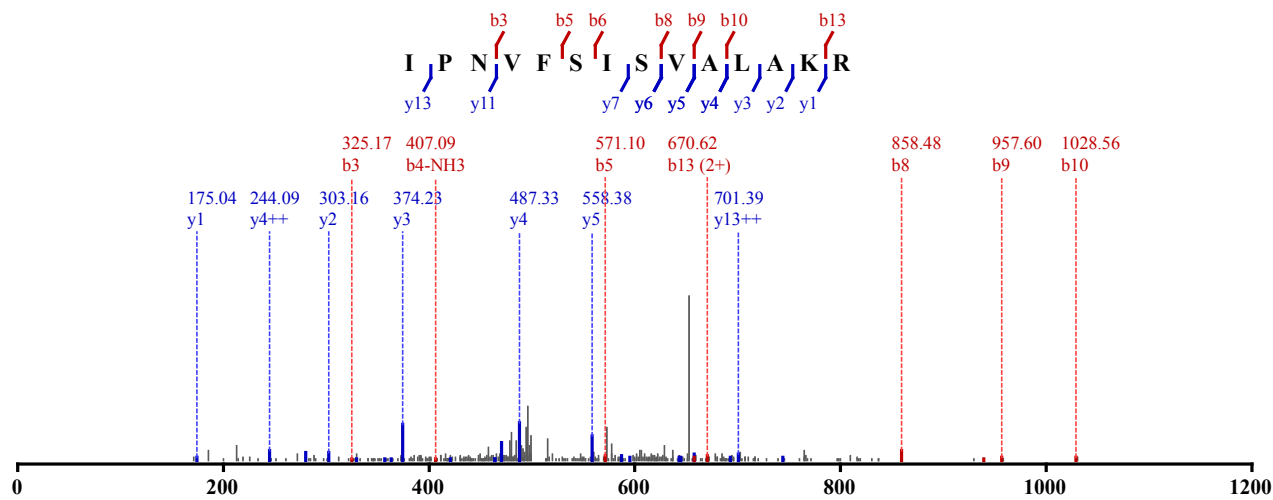

Not Modified

Identified in MSS488 with qvalue 0.00

Charge: 3, Exp. m/z: 505.640, Calc. m/z: 505.641

Data File: HeLa\_chy-try\_pH4\_CID\_3xload\_2, Scans: 26245 - 26245

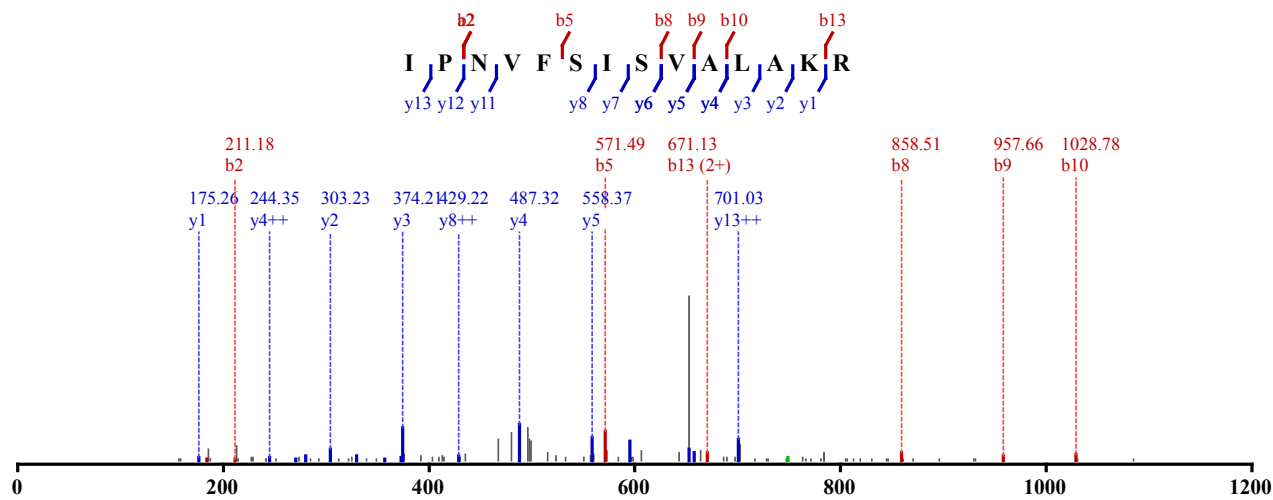

1 x Oxidation (M) 1 x Acetylation (Protein N-term)

Identified in MSS485 with qvalue 0.00

Charge: 2, Exp. m/z: 815.381, Calc. m/z: 815.382

Data File: HeLa\_LysC\_pH11\_HCD\_2, Scans: 28480 - 28480

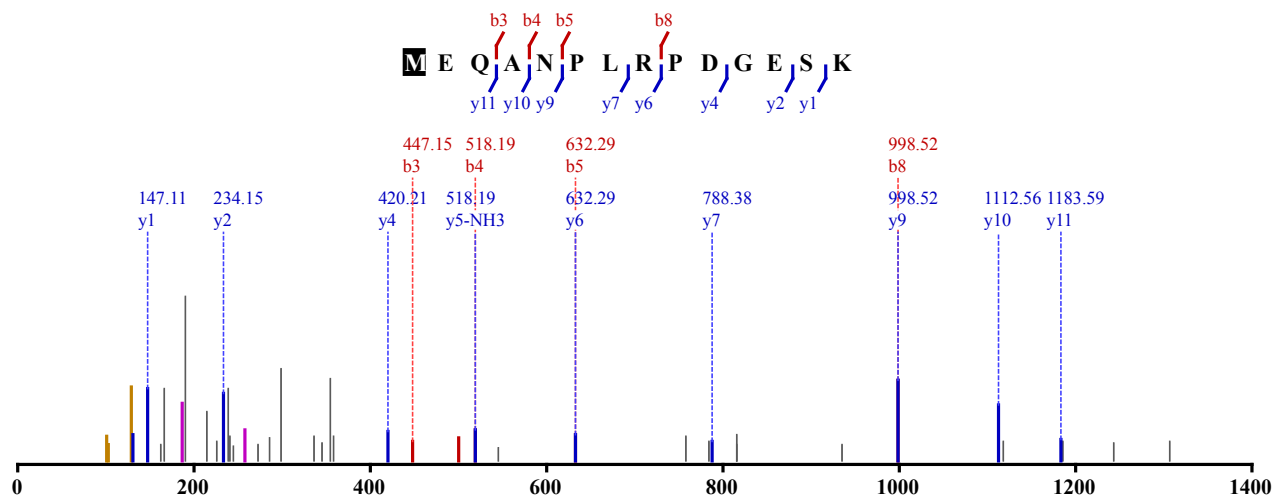

Not Modified

Identified in MSS128 with qvalue 0.00  
 Charge: 2, Exp. m/z: 949.961, Calc. m/z: 949.962  
 Data File: HeLa\_AspN\_HCD\_1, Scans: 23017 - 23017

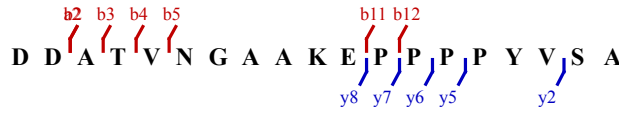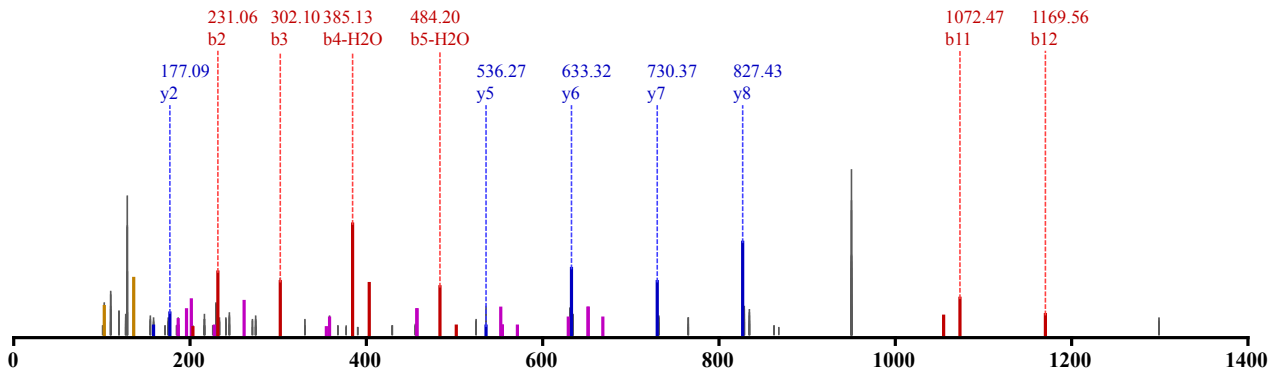

Not Modified  
 Identified in MSS128 with qvalue 0.00  
 Charge: 2, Exp. m/z: 949.960, Calc. m/z: 949.962  
 Data File: HeLa\_AspN\_HCD\_2, Scans: 23300 - 23300

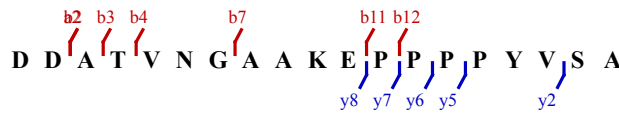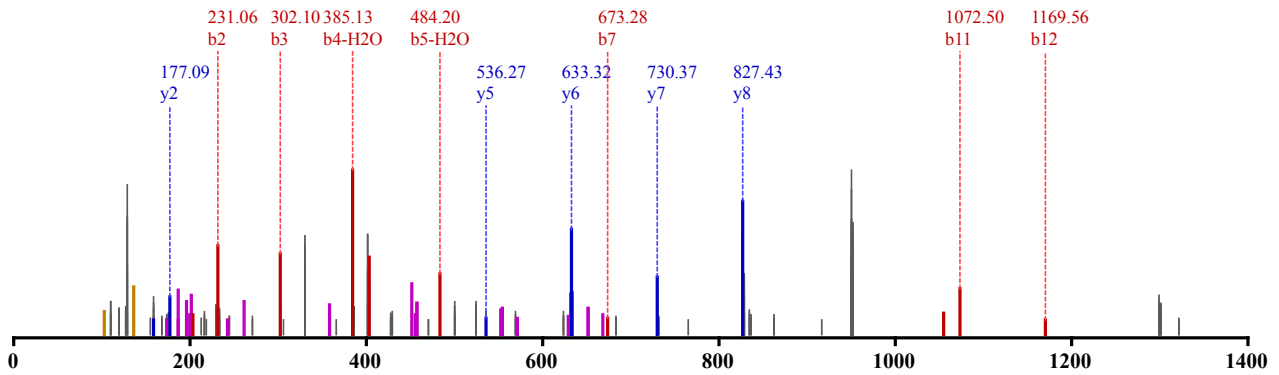

Not Modified  
 Identified in MSS143 with qvalue 0.00  
 Charge: 2, Exp. m/z: 949.961, Calc. m/z: 949.962  
 Data File: HeLa\_AspN-GluC\_HCD\_1, Scans: 24076 - 24076

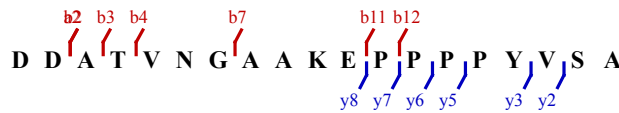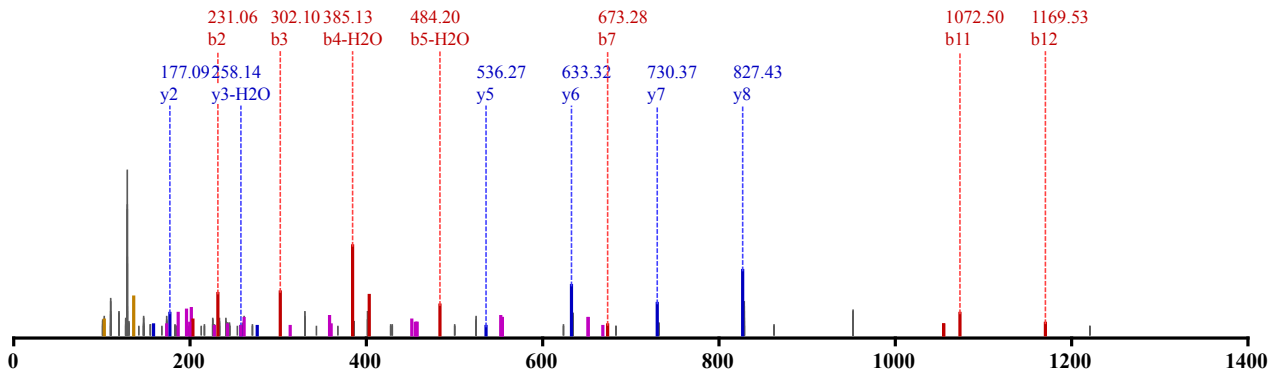

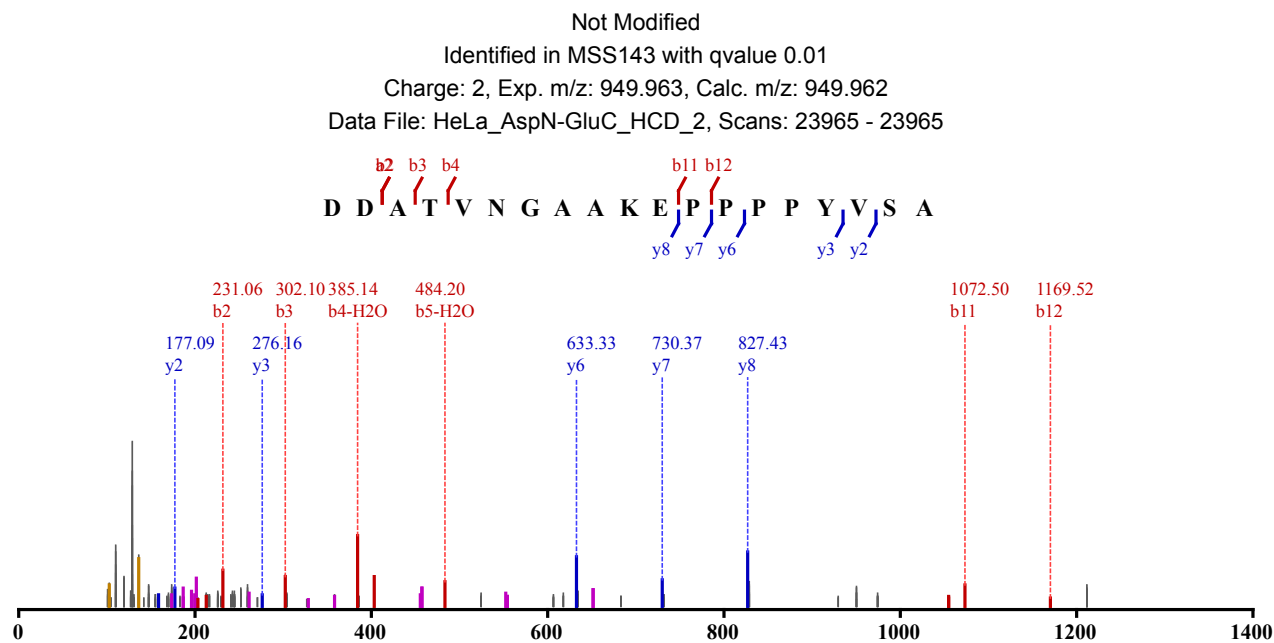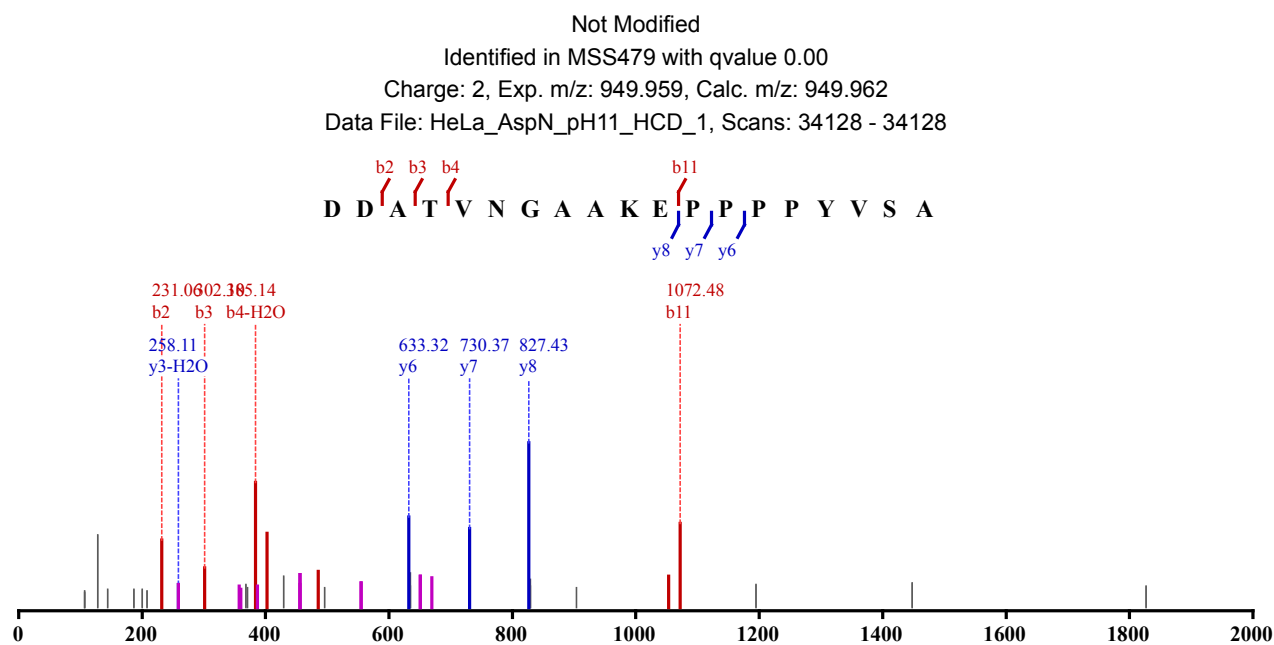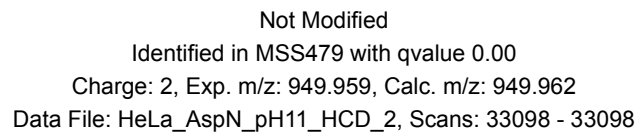

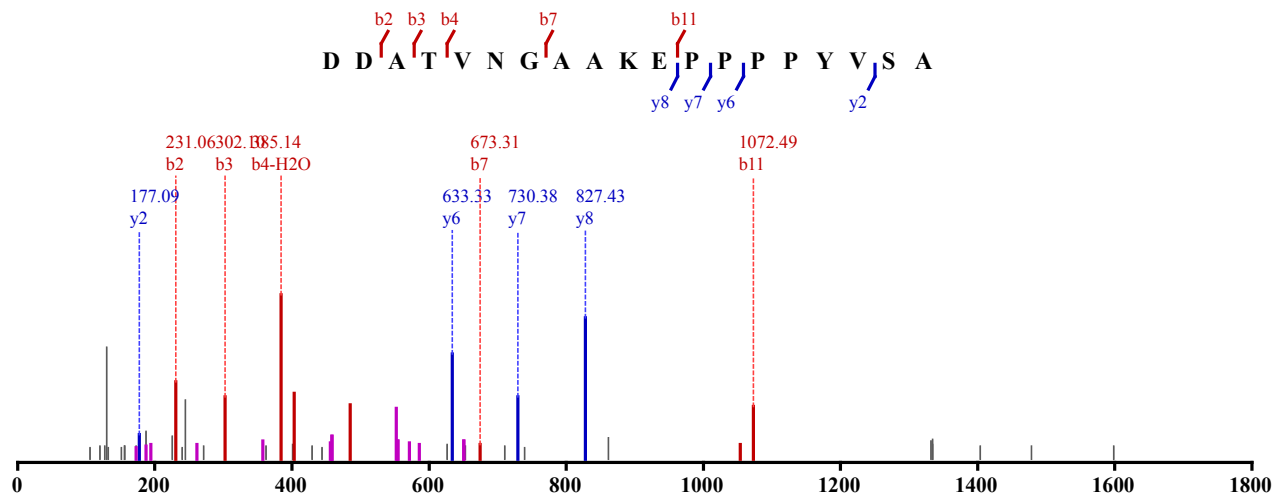

Not Modified  
 Identified in MSS479 with qvalue 0.00  
 Charge: 2, Exp. m/z: 949.958, Calc. m/z: 949.962  
 Data File: HeLa\_AspN\_pH11\_HCD\_3, Scans: 32460 - 32460

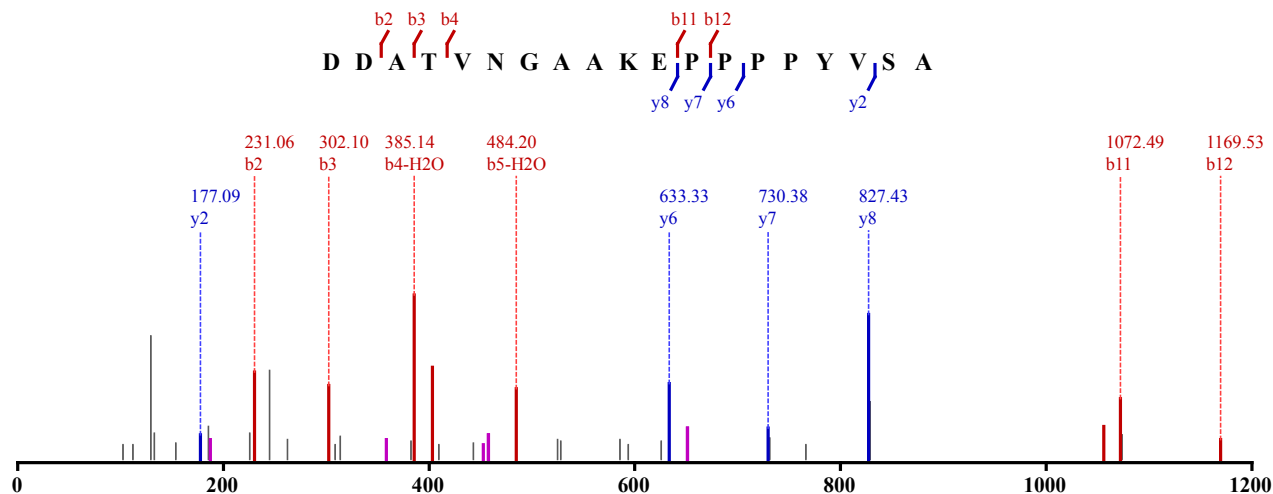

Not Modified  
 Identified in MSS479 with qvalue 0.00  
 Charge: 2, Exp. m/z: 949.962, Calc. m/z: 949.962  
 Data File: HeLa\_AspN\_pH8\_HCD\_1, Scans: 31229 - 31229

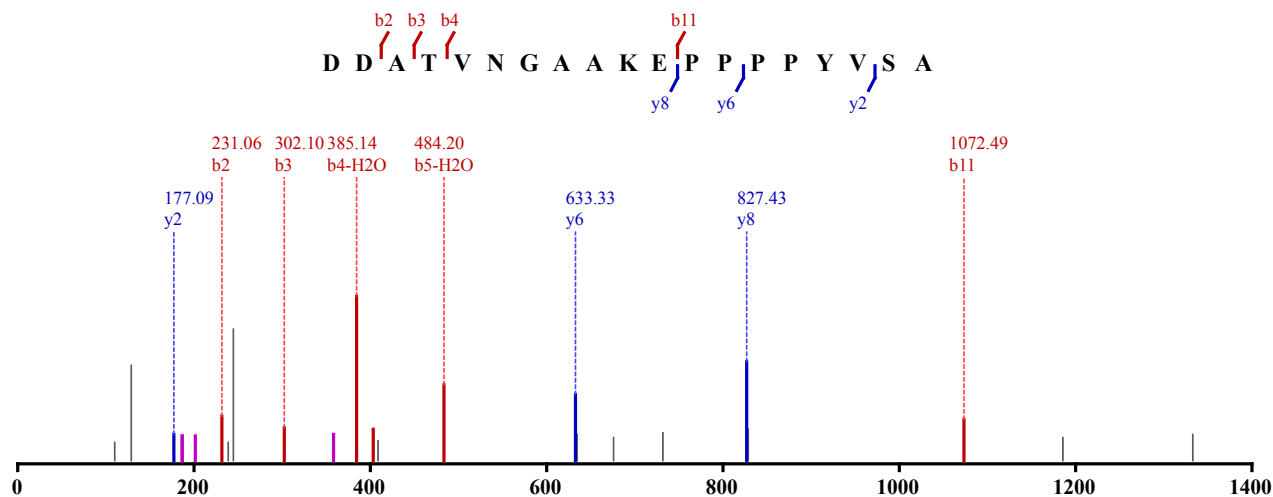

Not Modified  
 Identified in MSS479 with qvalue 0.00  
 Charge: 2, Exp. m/z: 949.959, Calc. m/z: 949.962

Data File: HeLa\_AspN\_pH8\_HCD\_2, Scans: 30505 - 30505

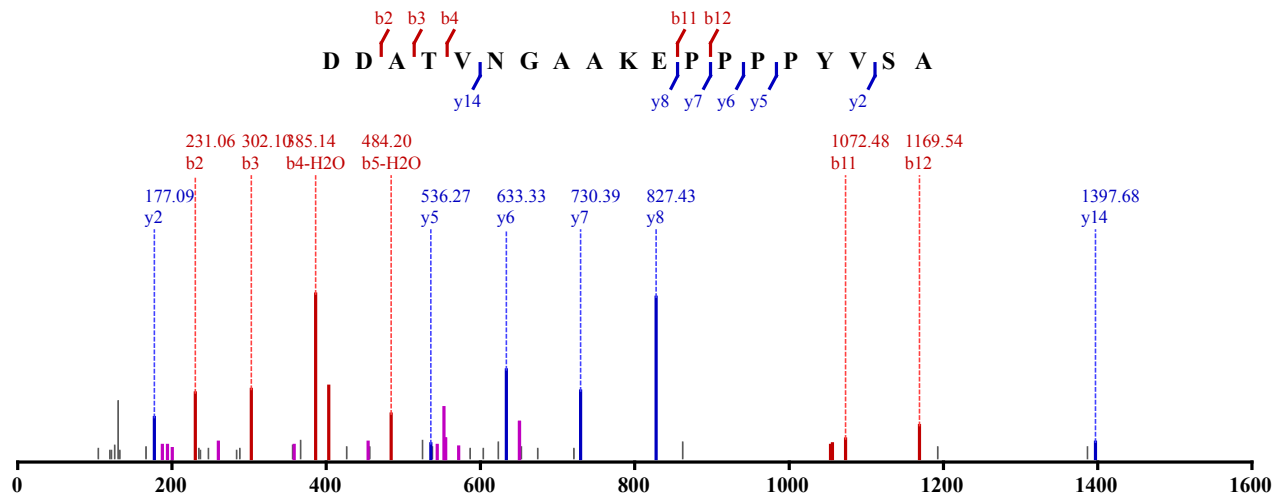

Not Modified

Identified in MSS479 with qvalue 0.00

Charge: 2, Exp. m/z: 949.959, Calc. m/z: 949.962

Data File: HeLa\_AspN\_pH8\_HCD\_3, Scans: 29785 - 29785

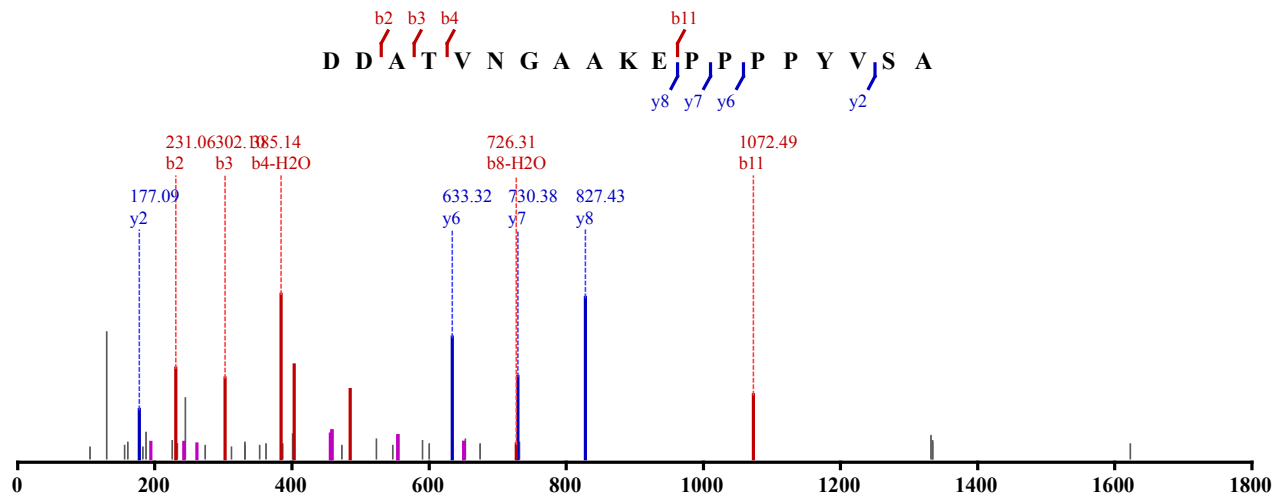

Not Modified

Identified in MSS483 with qvalue 0.00

Charge: 2, Exp. m/z: 949.961, Calc. m/z: 949.962

Data File: HeLa\_AspN\_pH6\_CID\_3xload, Scans: 18119 - 18119

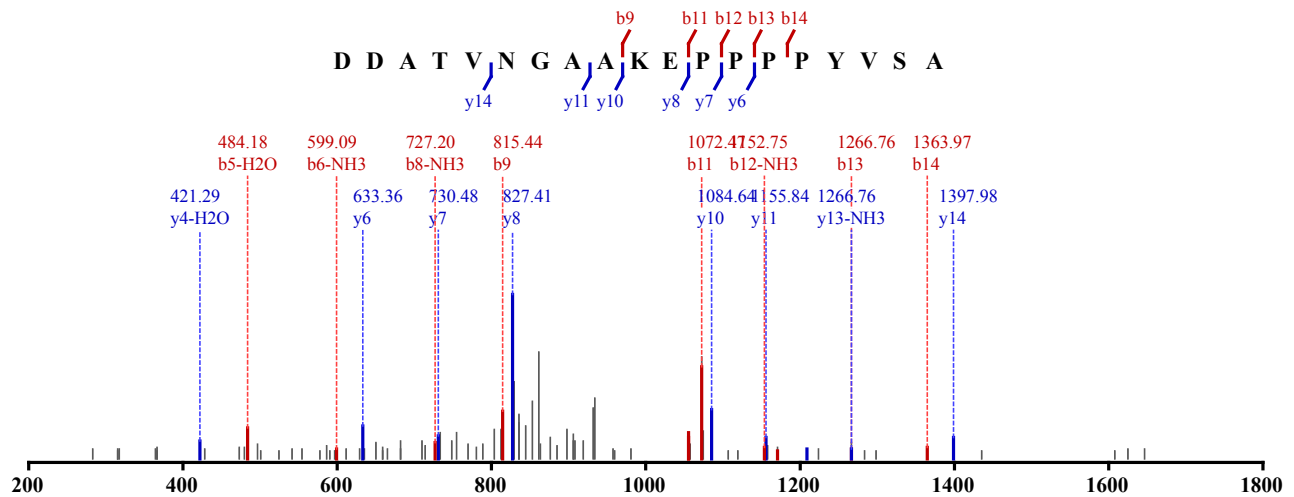

Not Modified

Identified in MSS483 with qvalue 0.00  
 Charge: 2, Exp. m/z: 949.961, Calc. m/z: 949.962  
 Data File: HeLa\_AspN\_pH8\_CID\_3xload\_2, Scans: 22795 - 22795

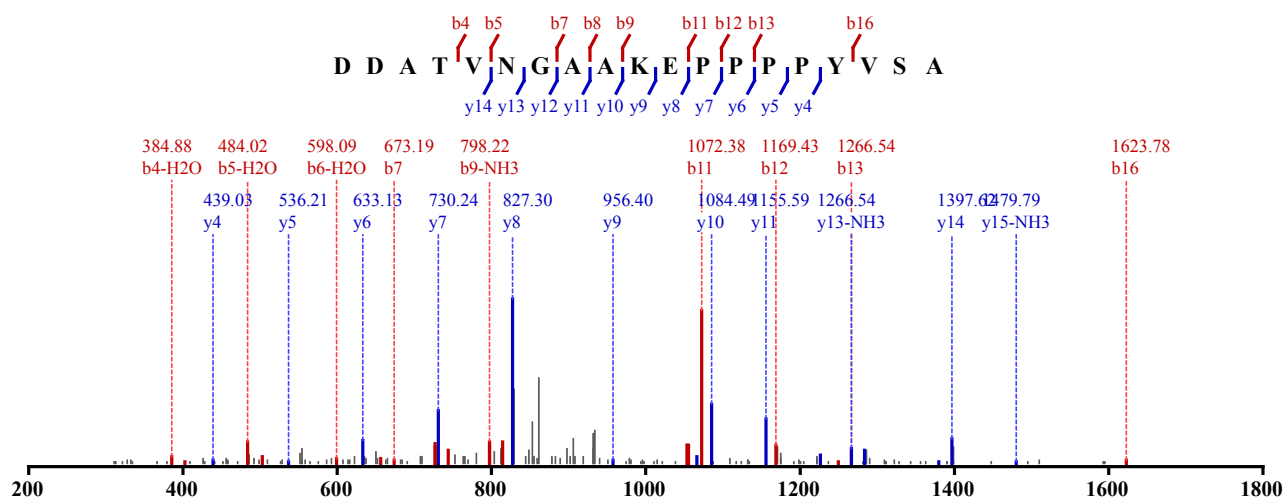

Not Modified  
 Identified in MSS122 with qvalue 0.00  
 Charge: 2, Exp. m/z: 628.319, Calc. m/z: 628.317  
 Data File: HeLa\_try\_HCD\_3, Scans: 44542 - 44542

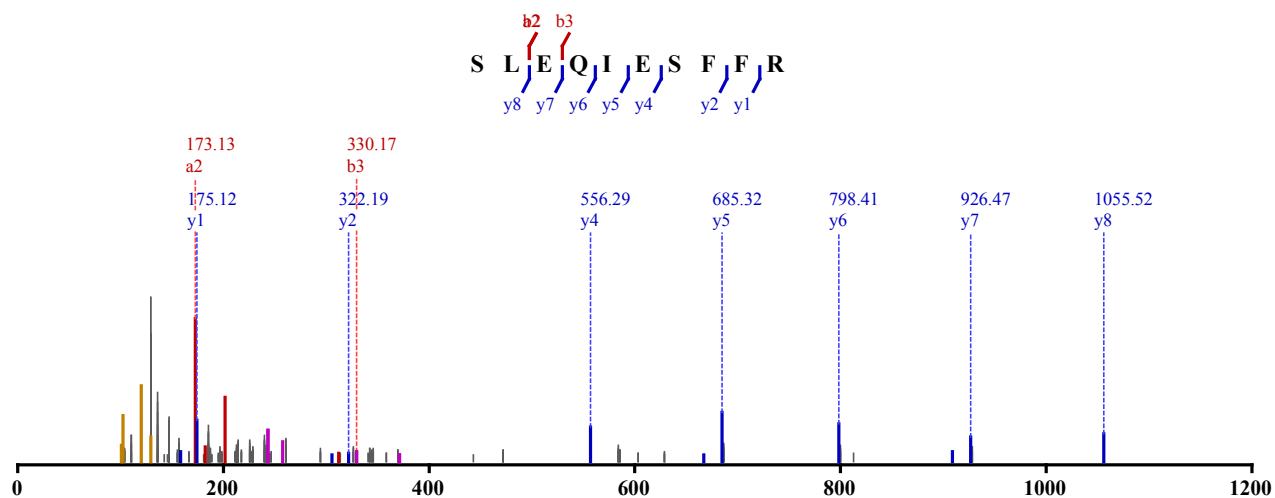

Not Modified  
 Identified in MSS130 with qvalue 0.00  
 Charge: 2, Exp. m/z: 628.318, Calc. m/z: 628.317  
 Data File: HeLa\_LysC-try\_HCD\_2, Scans: 46017 - 46017

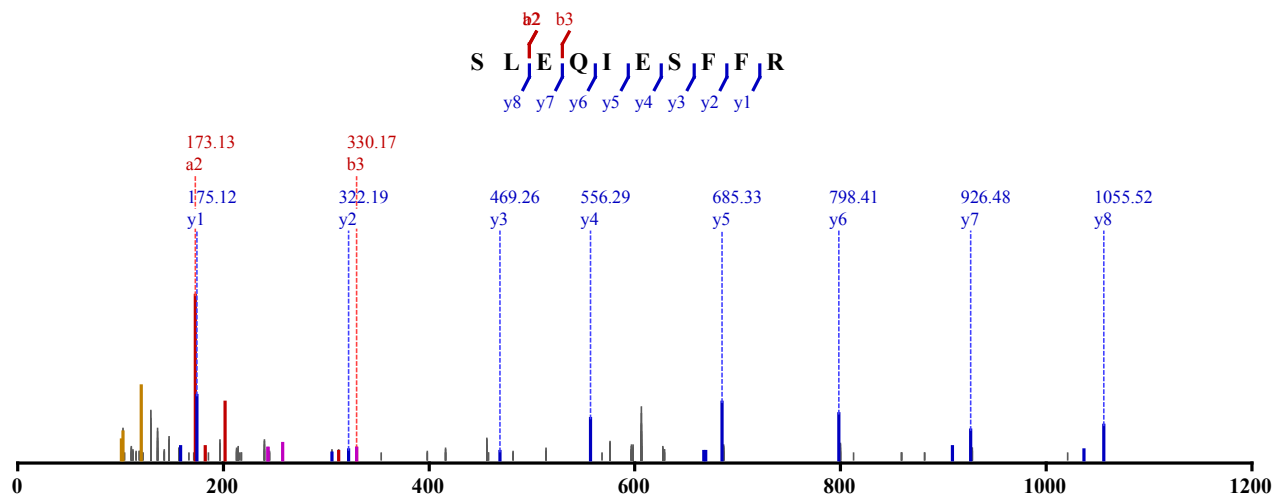

Not Modified  
 Identified in MSS487 with qvalue 0.00  
 Charge: 2, Exp. m/z: 628.321, Calc. m/z: 628.317  
 Data File: HeLa\_ArgC-Try\_pH2\_HCD\_1, Scans: 42156 - 42156

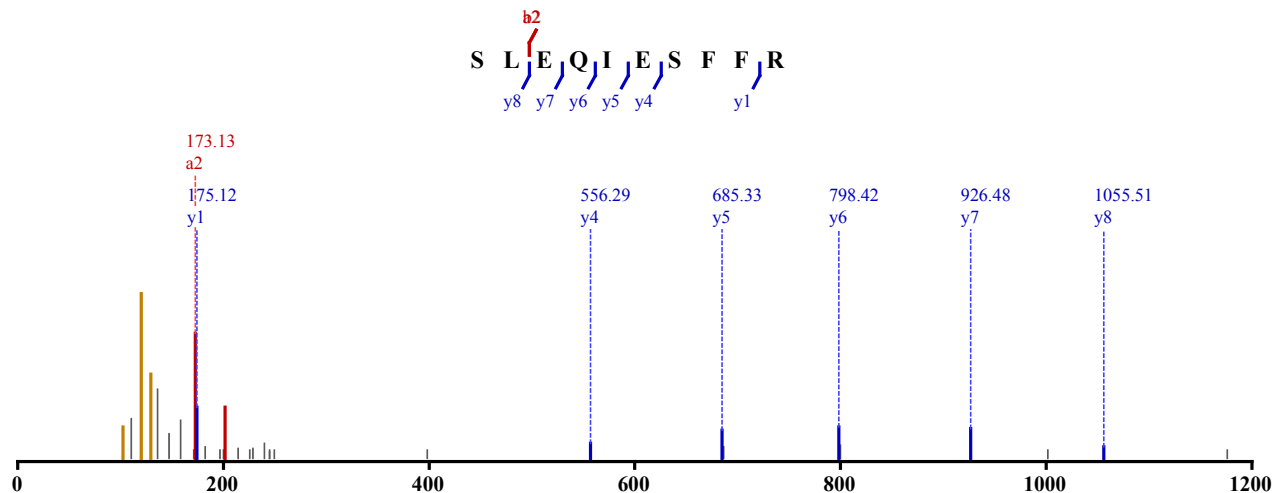

Not Modified  
 Identified in MSS479 with qvalue 0.00  
 Charge: 2, Exp. m/z: 703.375, Calc. m/z: 703.372  
 Data File: HeLa\_AspN\_pH3\_HCD\_1, Scans: 42134 - 42134

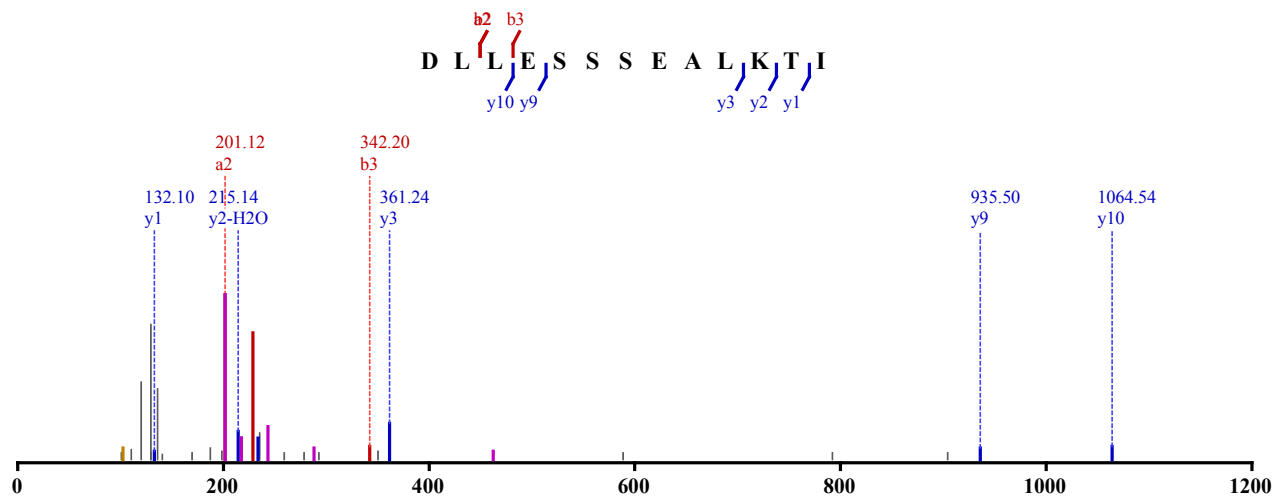

Not Modified  
 Identified in MSS483 with qvalue 0.00  
 Charge: 2, Exp. m/z: 703.375, Calc. m/z: 703.377  
 Data File: HeLa\_AspN\_pH3\_CID\_3xload, Scans: 33855 - 33855

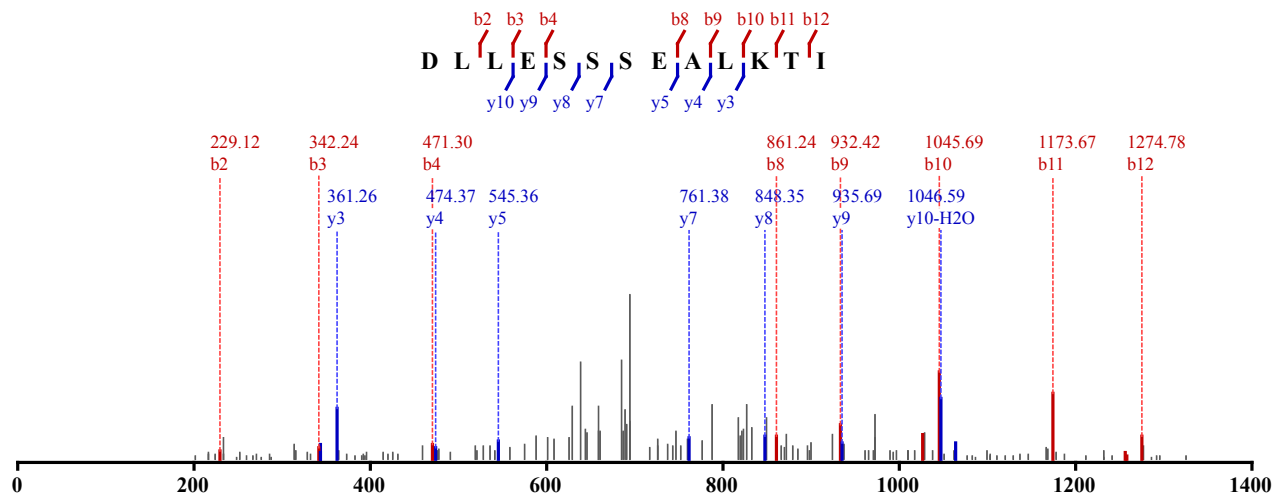

Not Modified  
 Identified in MSS488 with qvalue 0.00  
 Charge: 2, Exp. m/z: 874.984, Calc. m/z: 874.982  
 Data File: HeLa\_chy-try\_pH2\_CID\_3xload\_2, Scans: 44823 - 44823

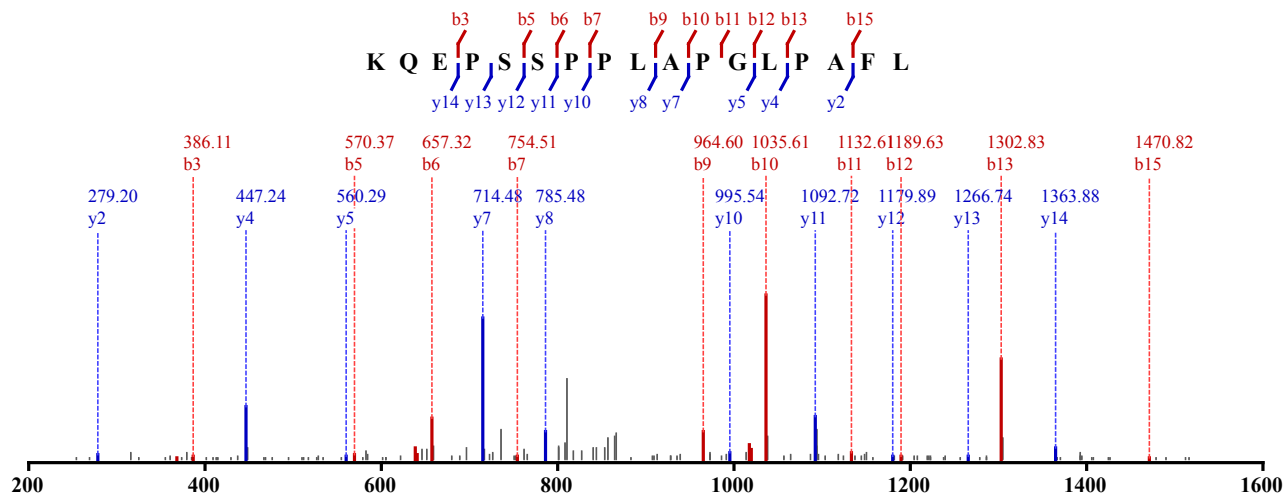

Not Modified  
 Identified in MSS488 with qvalue 0.00  
 Charge: 2, Exp. m/z: 874.985, Calc. m/z: 874.982  
 Data File: HeLa\_chy-try\_pH2\_CID\_3xload\_3, Scans: 46990 - 46990

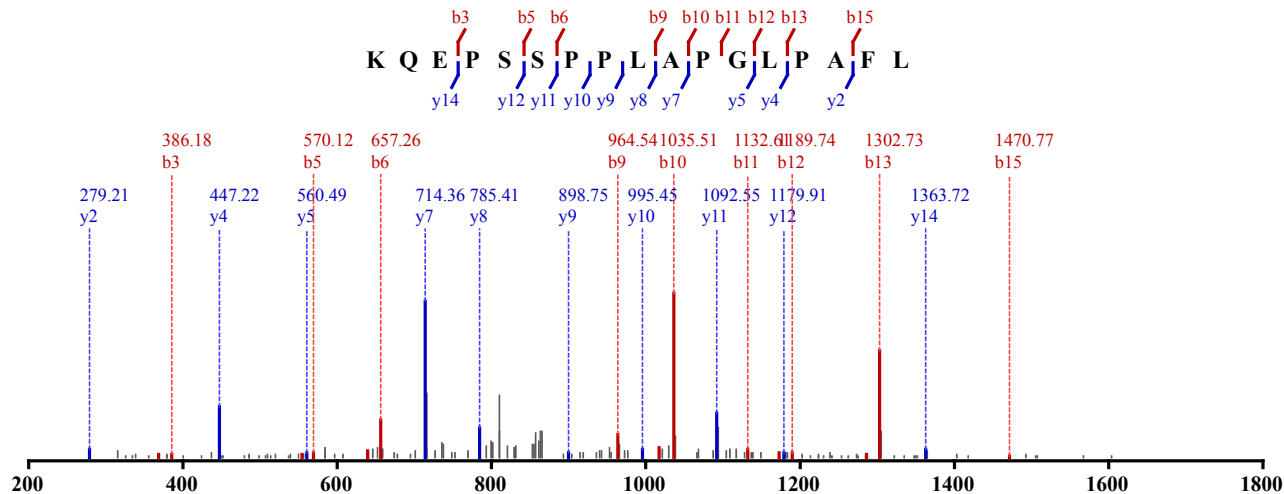

Not Modified  
 Identified in MSS488 with qvalue 0.00  
 Charge: 2, Exp. m/z: 874.986, Calc. m/z: 874.982



Data File: HeLa\_chy-try\_pH3\_CID\_3xload\_2, Scans: 50691 - 50691

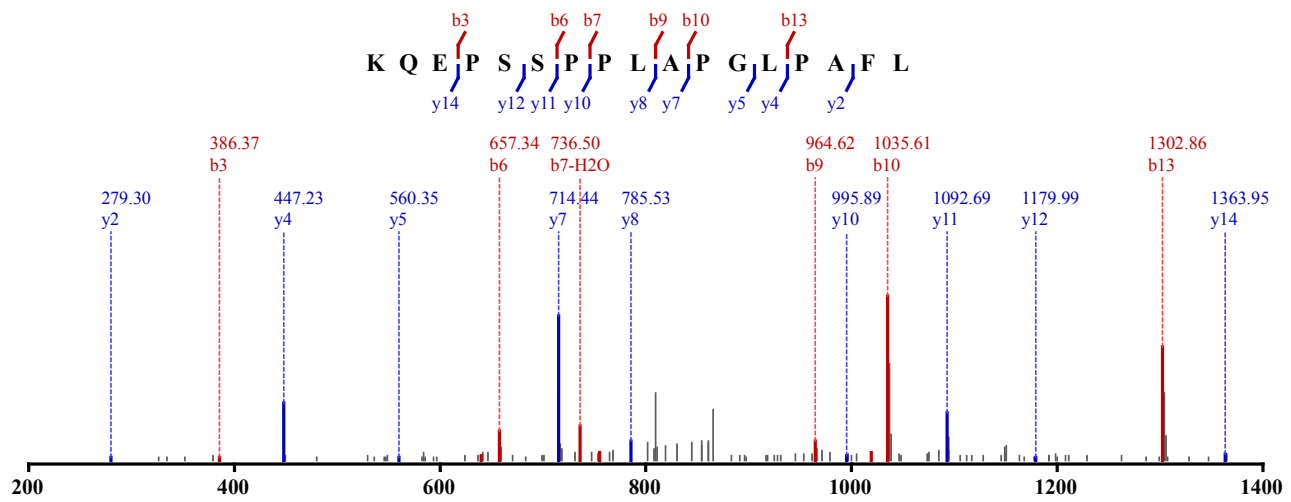

Not Modified

Identified in MSS488 with qvalue 0.00

Charge: 2, Exp. m/z: 875.485, Calc. m/z: 874.982

Data File: HeLa\_chy-try\_pH3\_CID\_3xload\_3, Scans: 50610 - 50610

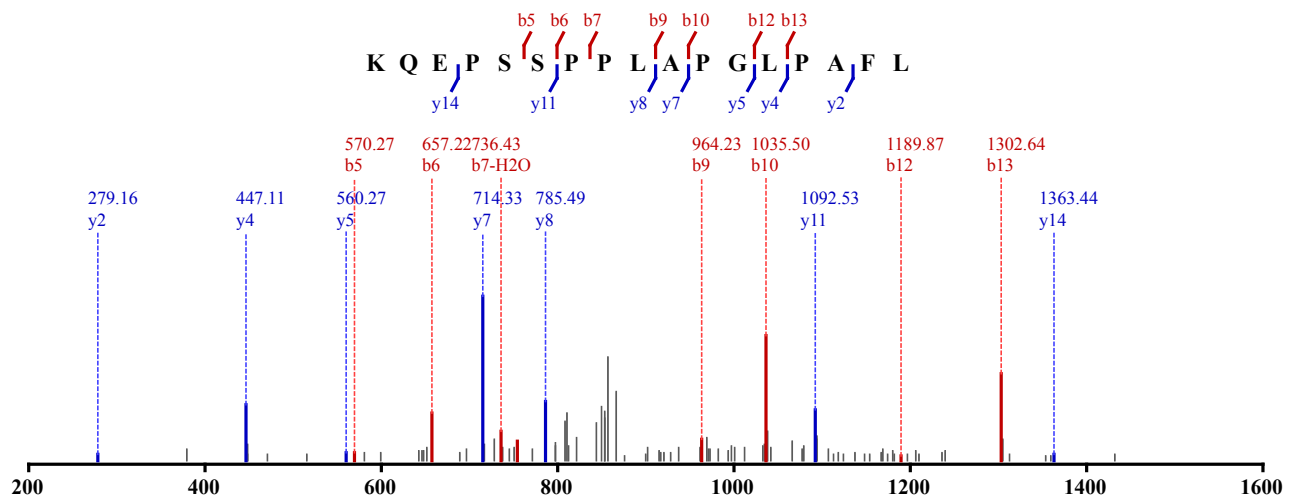

Not Modified

Identified in MSS488 with qvalue 0.00

Charge: 2, Exp. m/z: 874.982, Calc. m/z: 874.982

Data File: HeLa\_chy-try\_pH3\_CID\_3xload, Scans: 54016 - 54016

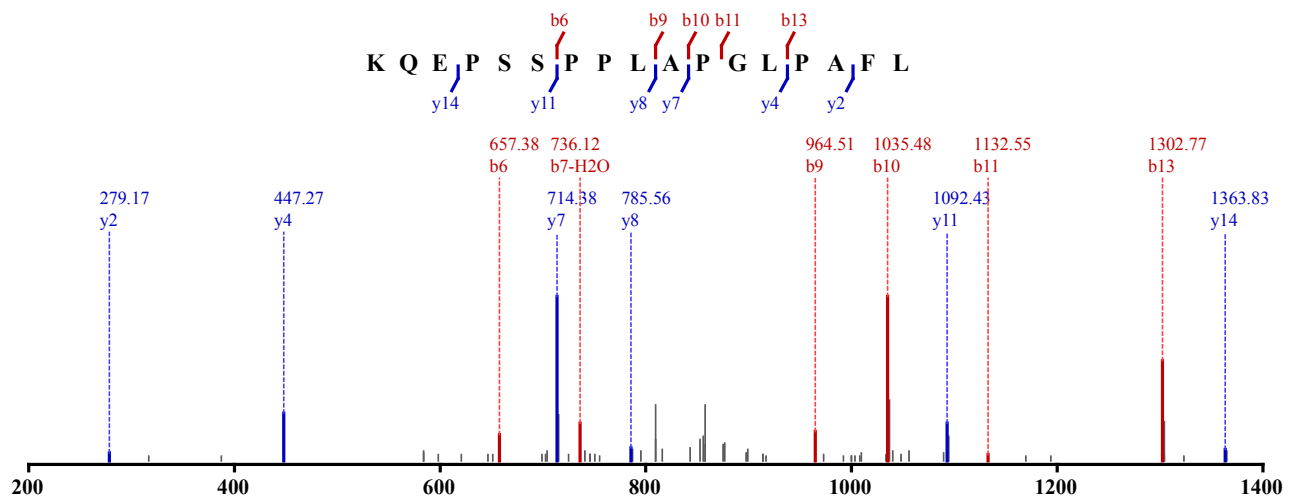

Not Modified

Identified in MSS118 with qvalue 0.00

Charge: 4, Exp. m/z: 539.575, Calc. m/z: 539.322

Data File: HeLa\_elastase\_HCD\_1, Scans: 26988 - 26988

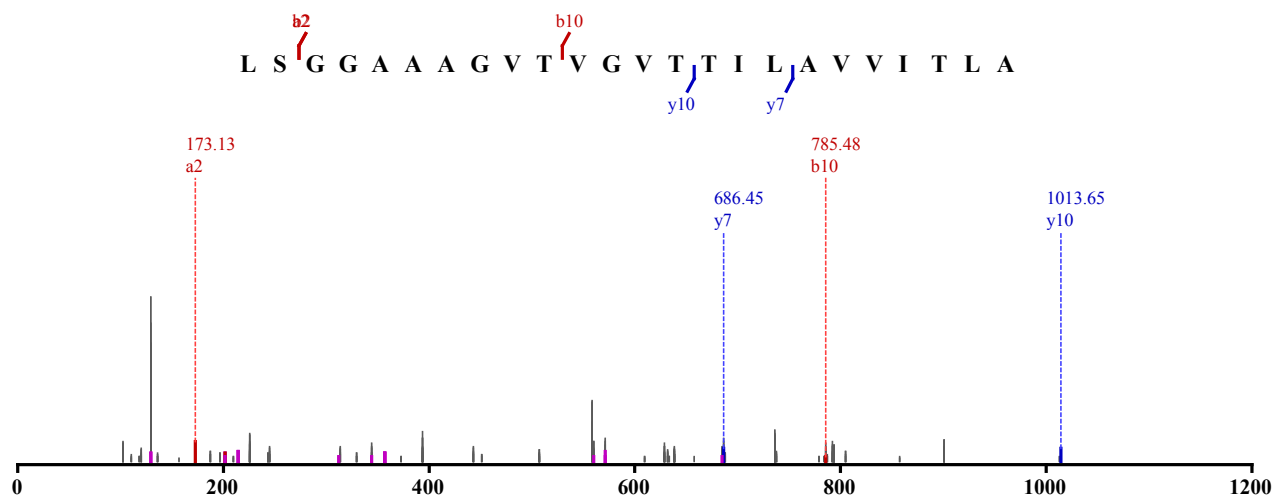

Not Modified

Identified in MSS118 with qvalue 0.00

Charge: 5, Exp. m/z: 431.862, Calc. m/z: 431.659

Data File: HeLa\_elastase\_HCD\_1, Scans: 27023 - 27023

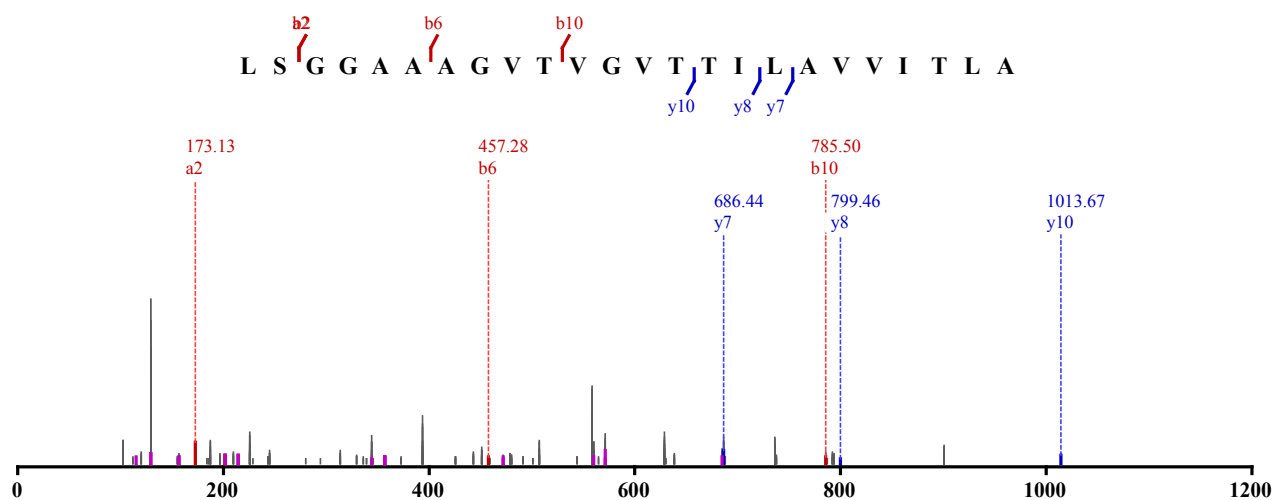

Not Modified

Identified in MSS118 with qvalue 0.00

Charge: 4, Exp. m/z: 539.576, Calc. m/z: 539.322

Data File: HeLa\_elastase\_HCD\_2, Scans: 30121 - 30121

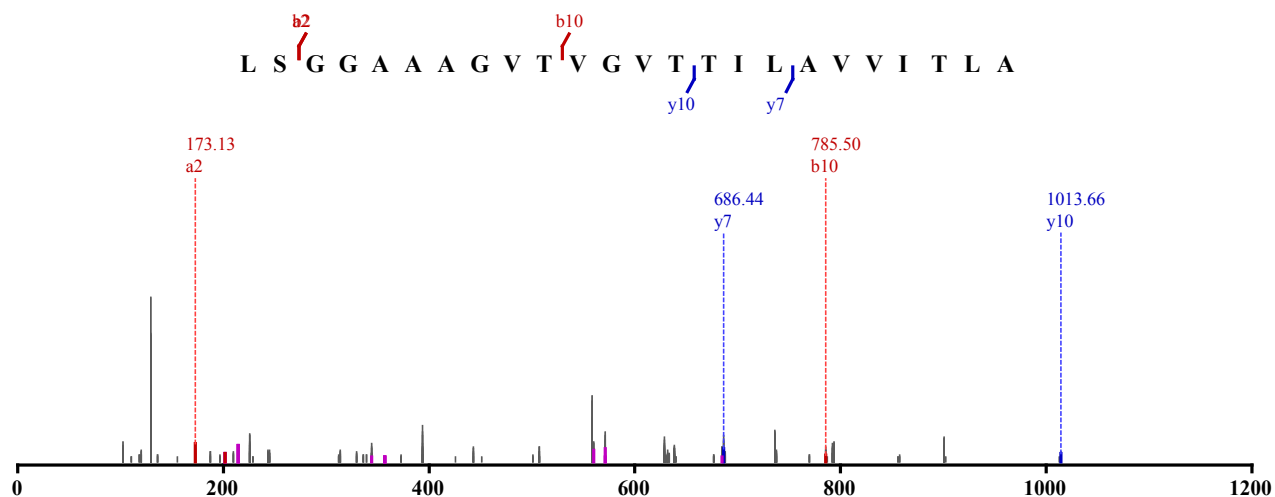

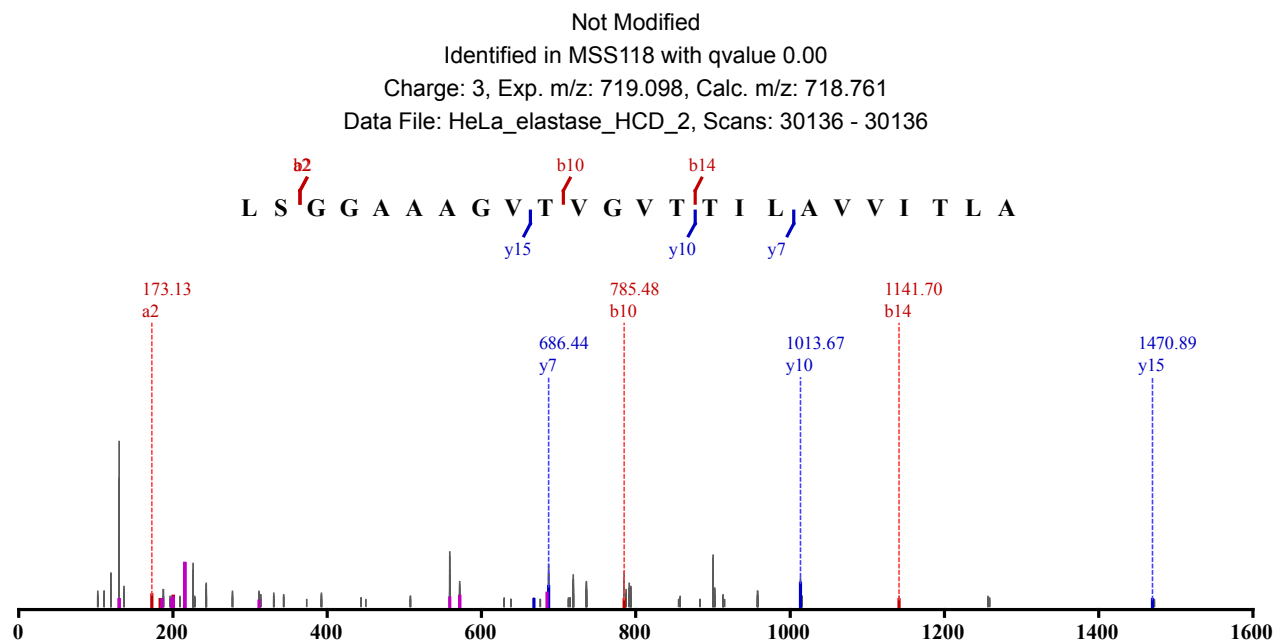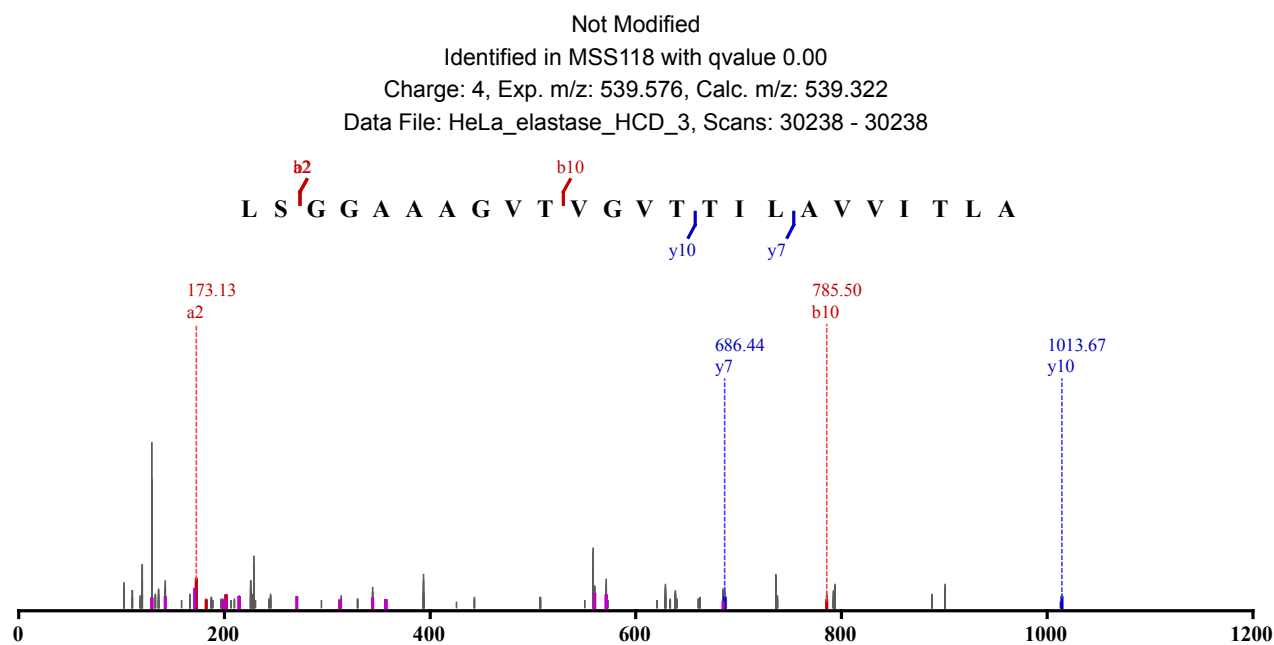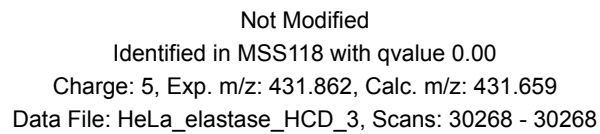

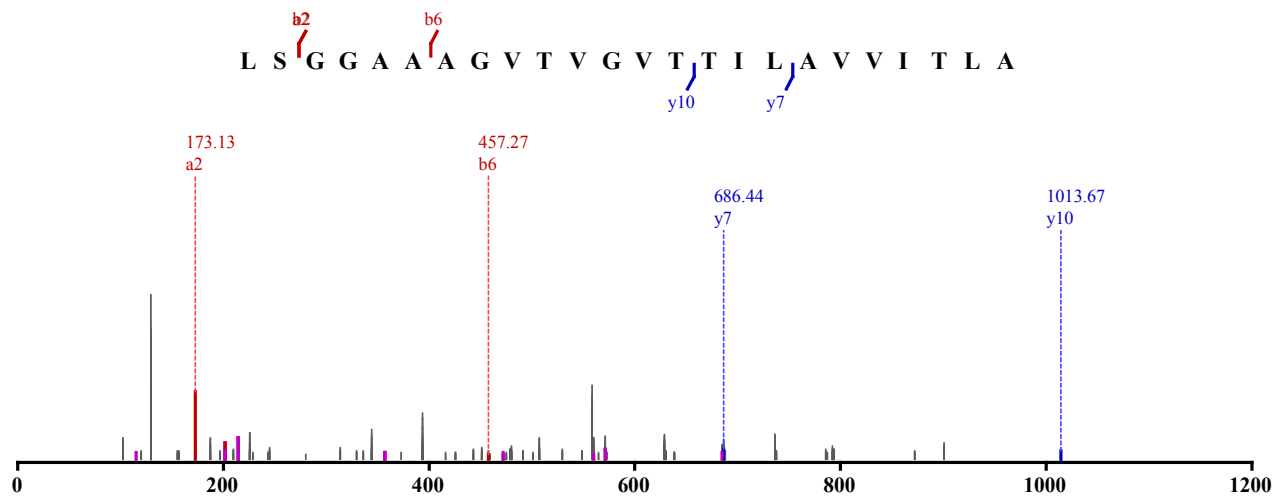

Not Modified

Identified in MSS118 with qvalue 0.00

Charge: 4, Exp. m/z: 539.575, Calc. m/z: 539.322

Data File: HeLa\_elastase\_HCD\_3, Scans: 30380 - 30380

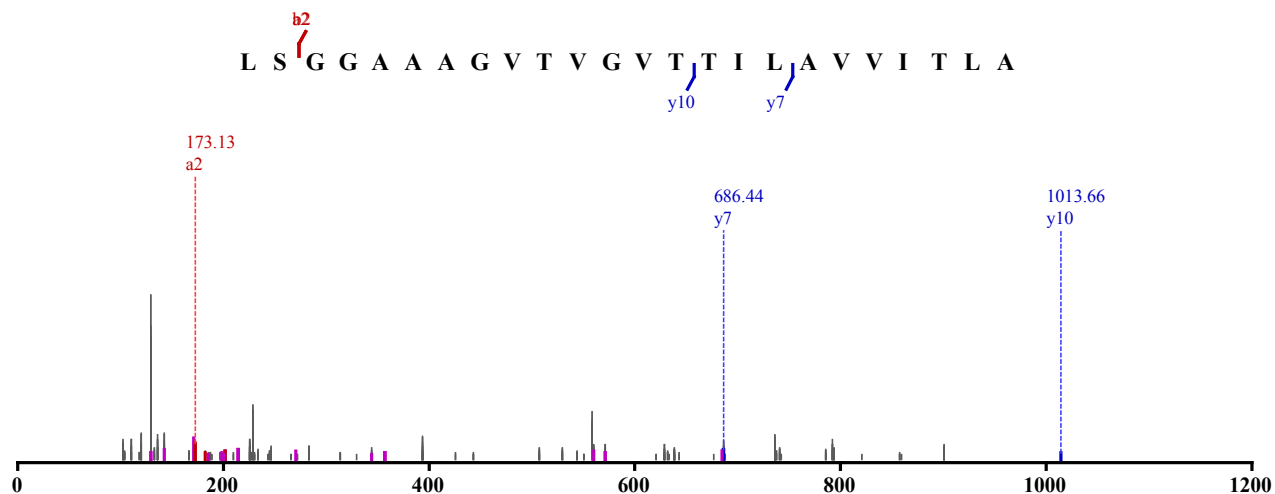

Not Modified

Identified in MSS136 with qvalue 0.00

Charge: 4, Exp. m/z: 539.575, Calc. m/z: 539.322

Data File: HeLa\_GluC-elastase\_HCD\_1, Scans: 24927 - 24927

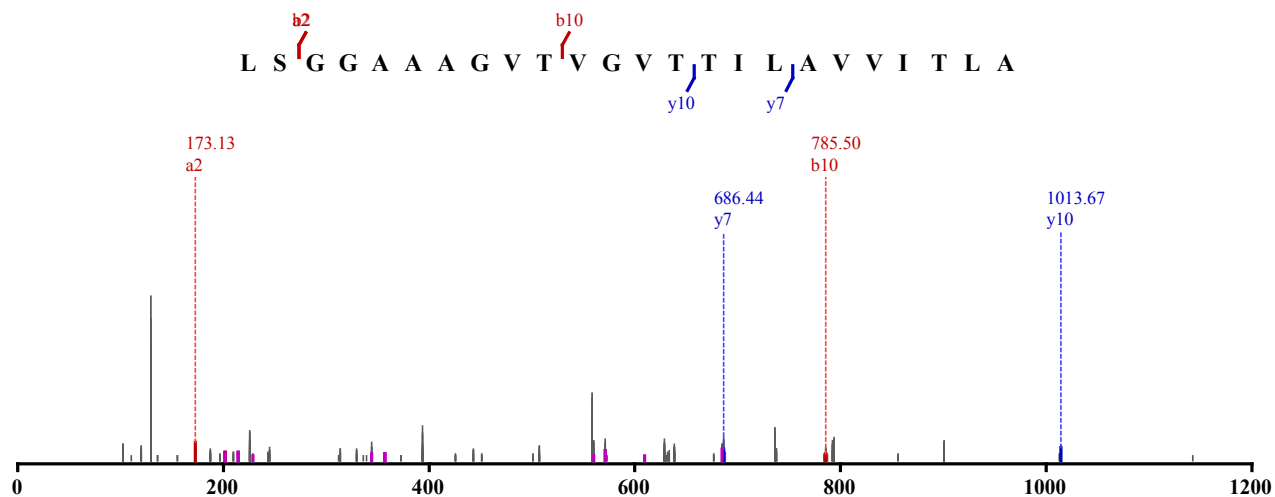

Not Modified

Identified in MSS136 with qvalue 0.00

Charge: 5, Exp. m/z: 431.862, Calc. m/z: 431.659

Data File: HeLa\_GluC- elastase\_HCD\_1, Scans: 24955 - 24955

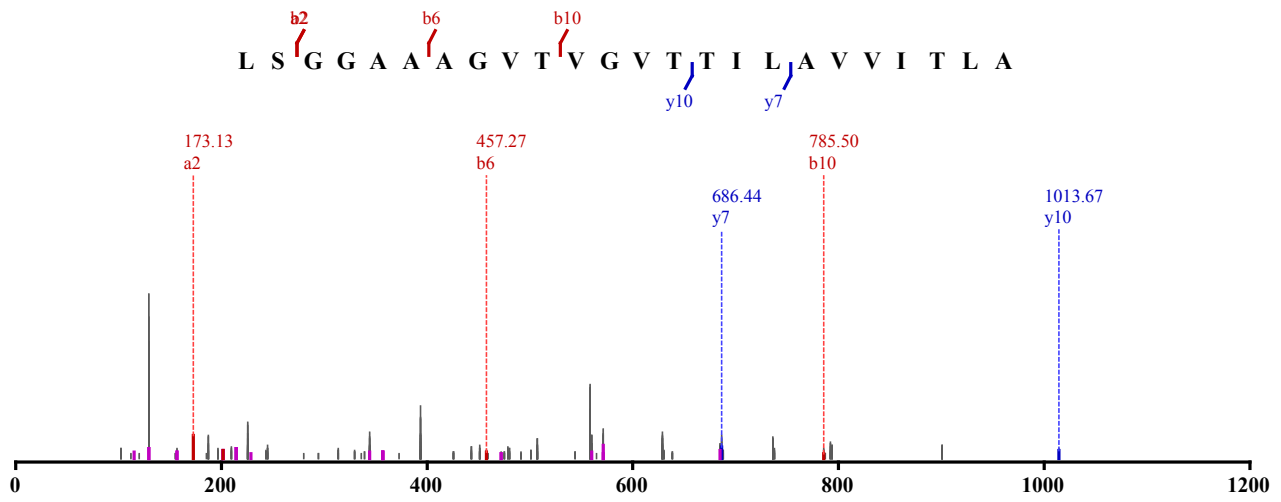

Not Modified

Identified in MSS136 with qvalue 0.00

Charge: 3, Exp. m/z: 719.097, Calc. m/z: 718.761

Data File: HeLa\_GluC- elastase\_HCD\_2, Scans: 32022 - 32022

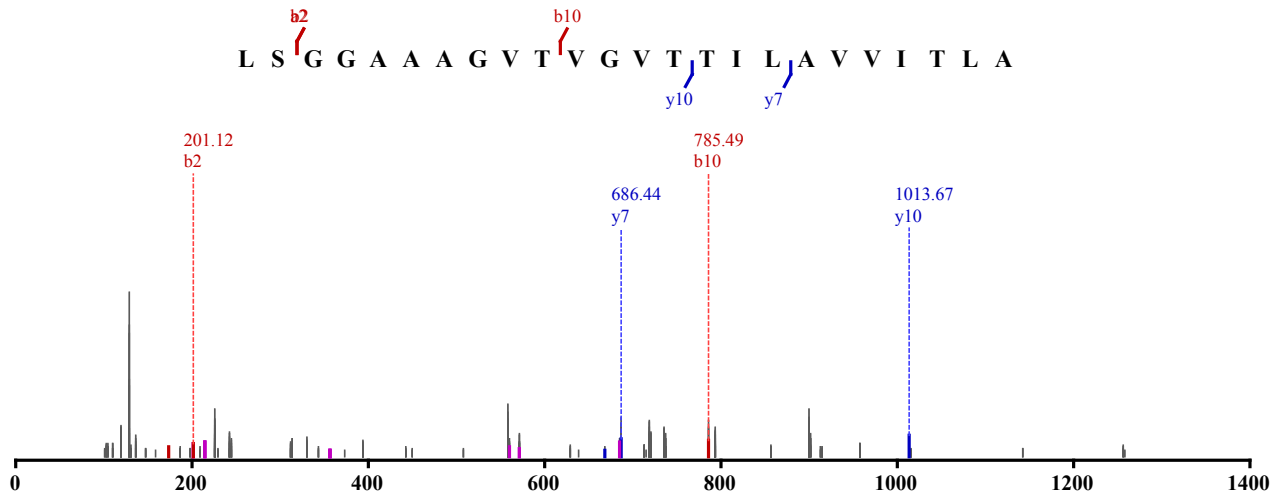

Not Modified

Identified in MSS136 with qvalue 0.00

Charge: 4, Exp. m/z: 539.576, Calc. m/z: 539.322

Data File: HeLa\_GluC- elastase\_HCD\_2, Scans: 32029 - 32029

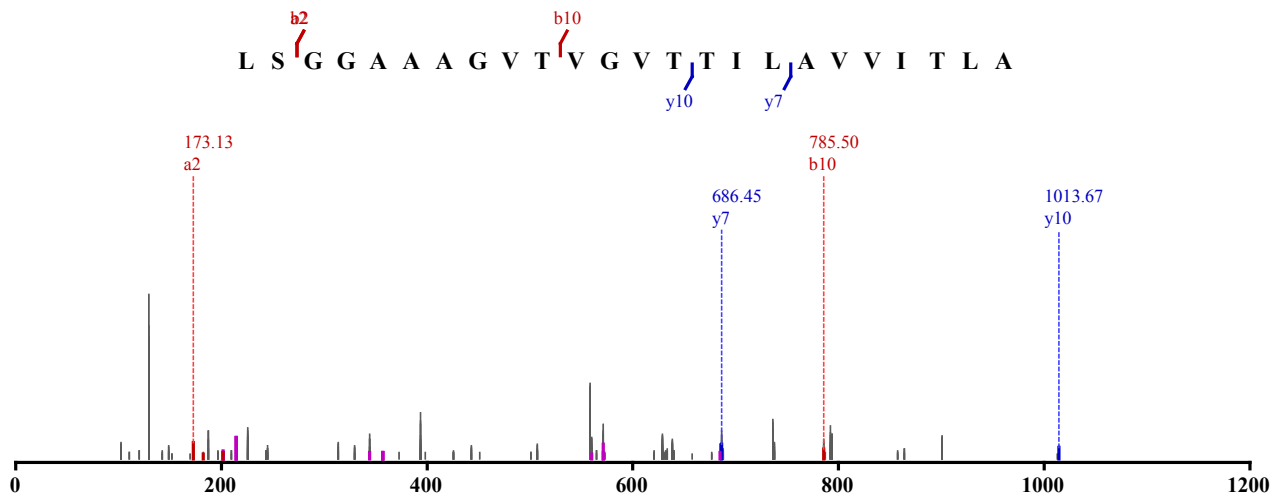

Not Modified

Identified in MSS136 with qvalue 0.00

Charge: 5, Exp. m/z: 431.862, Calc. m/z: 431.659

Data File: HeLa\_GluC- elastase\_HCD\_2, Scans: 32056 - 32056

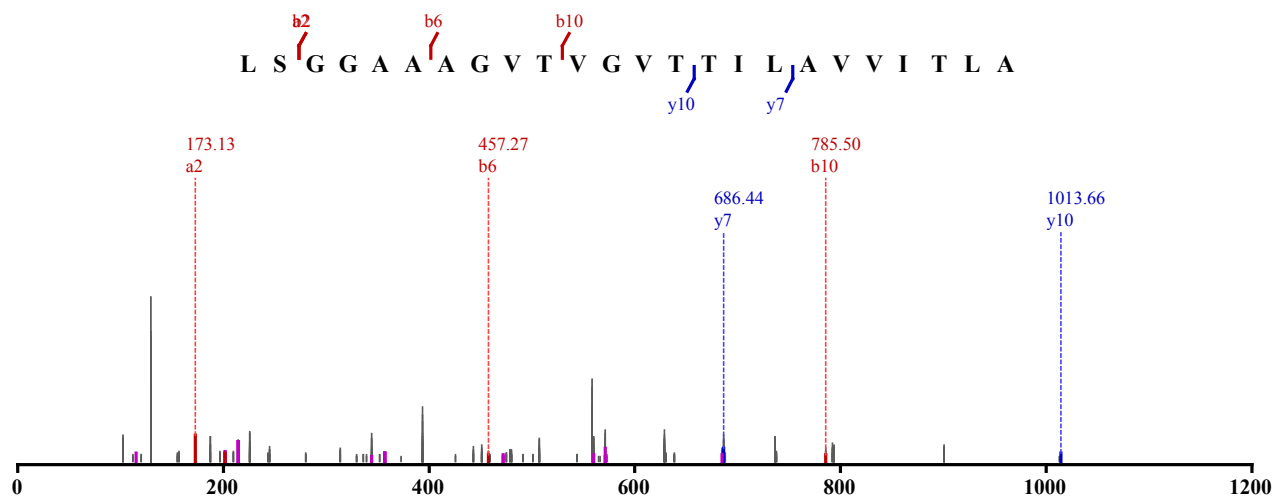

Not Modified

Identified in MSS136 with qvalue 0.00

Charge: 4, Exp. m/z: 539.576, Calc. m/z: 539.322

Data File: HeLa\_GluC- elastase\_HCD\_3, Scans: 31561 - 31561

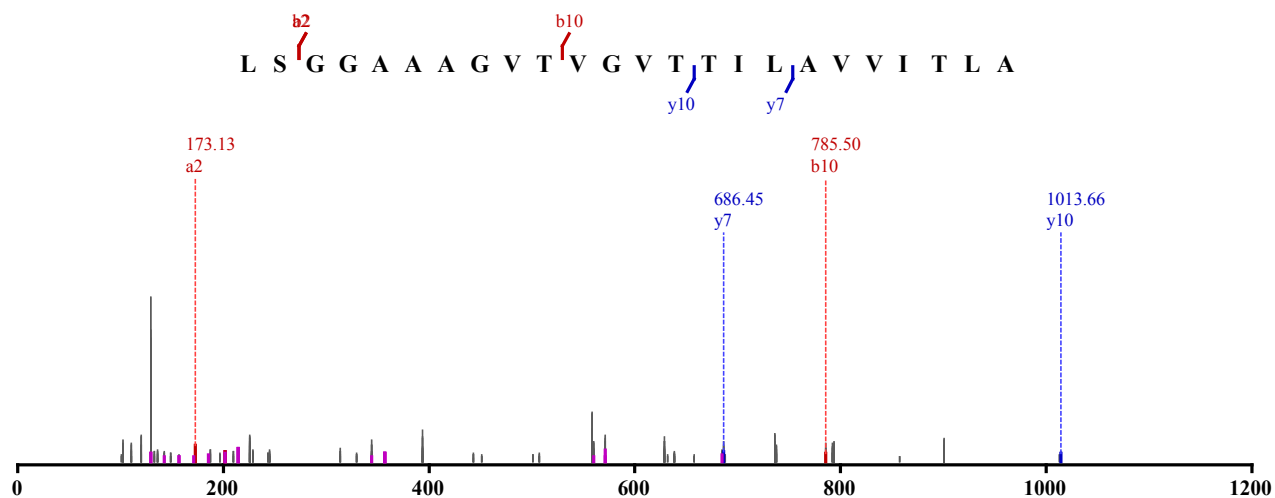

Not Modified

Identified in MSS136 with qvalue 0.00

Charge: 3, Exp. m/z: 719.098, Calc. m/z: 718.761

Data File: HeLa\_GluC- elastase\_HCD\_3, Scans: 31578 - 31578

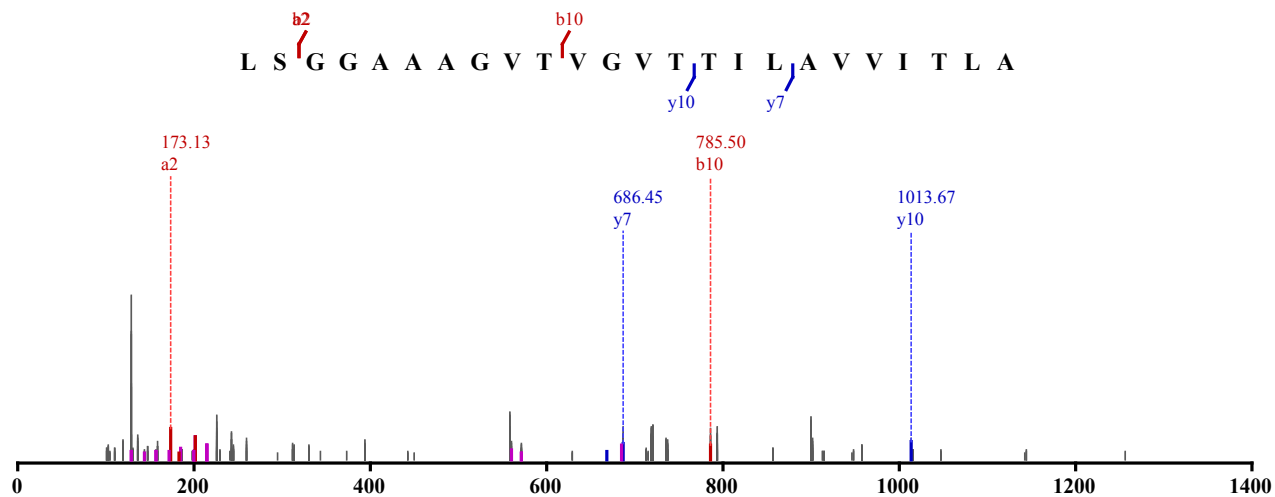

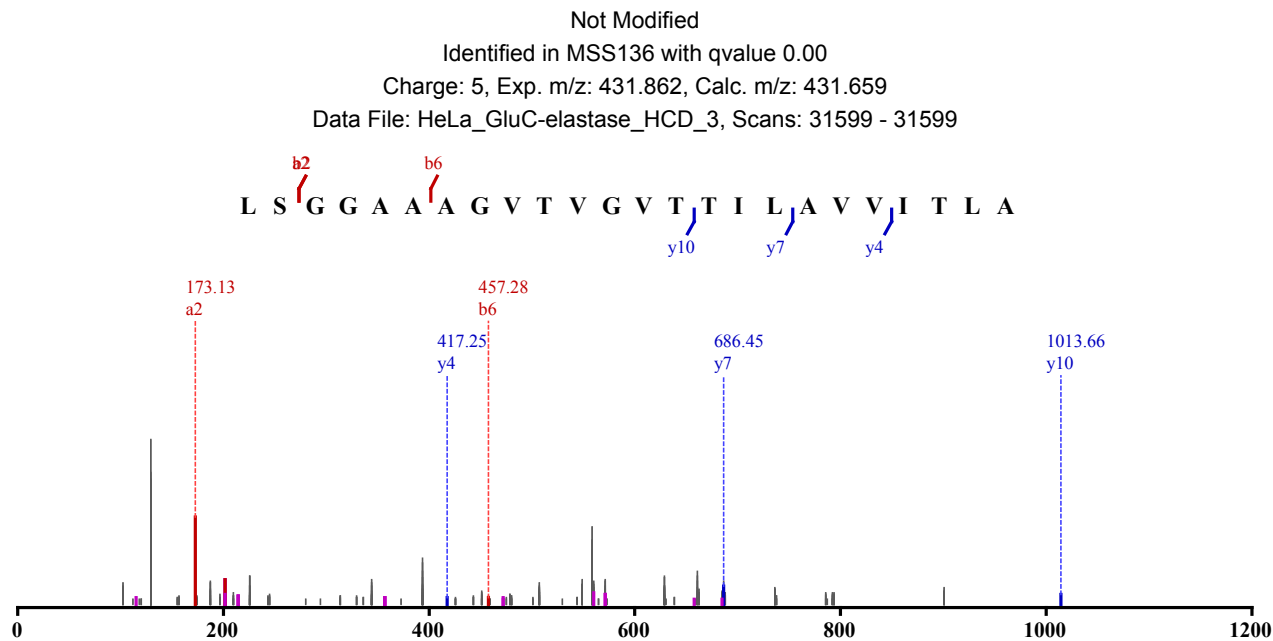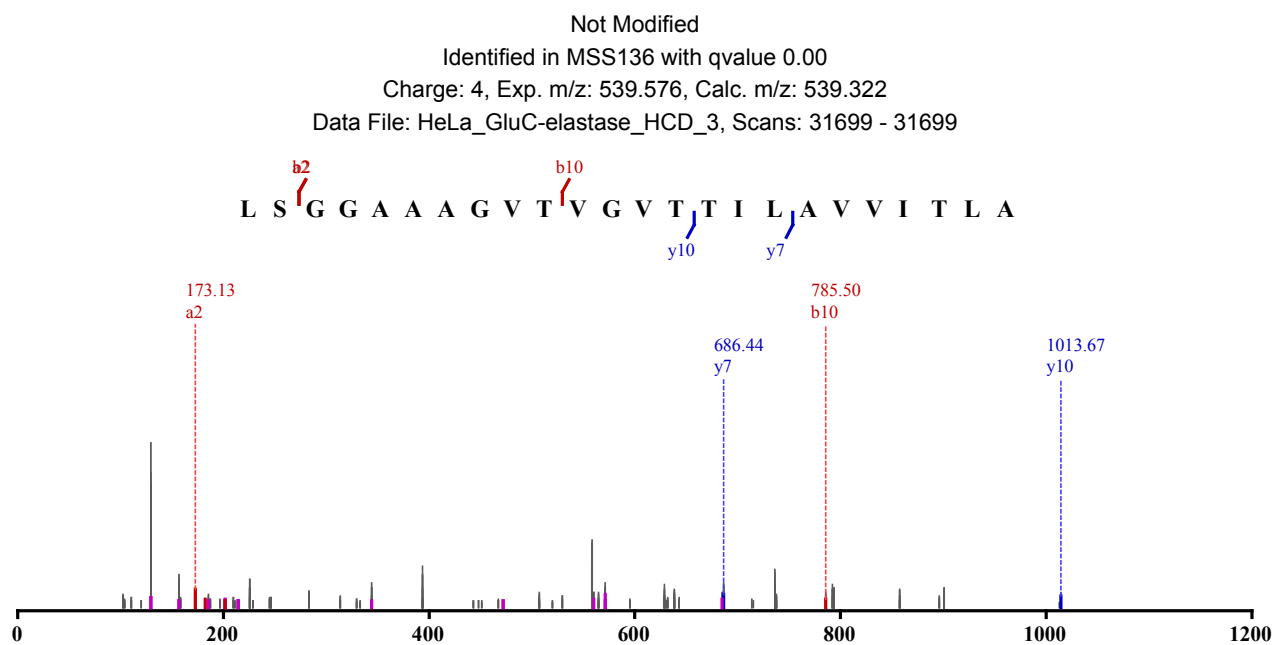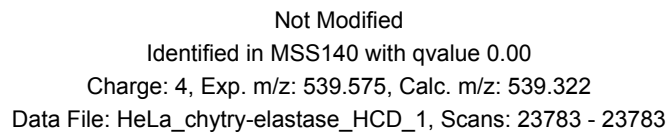

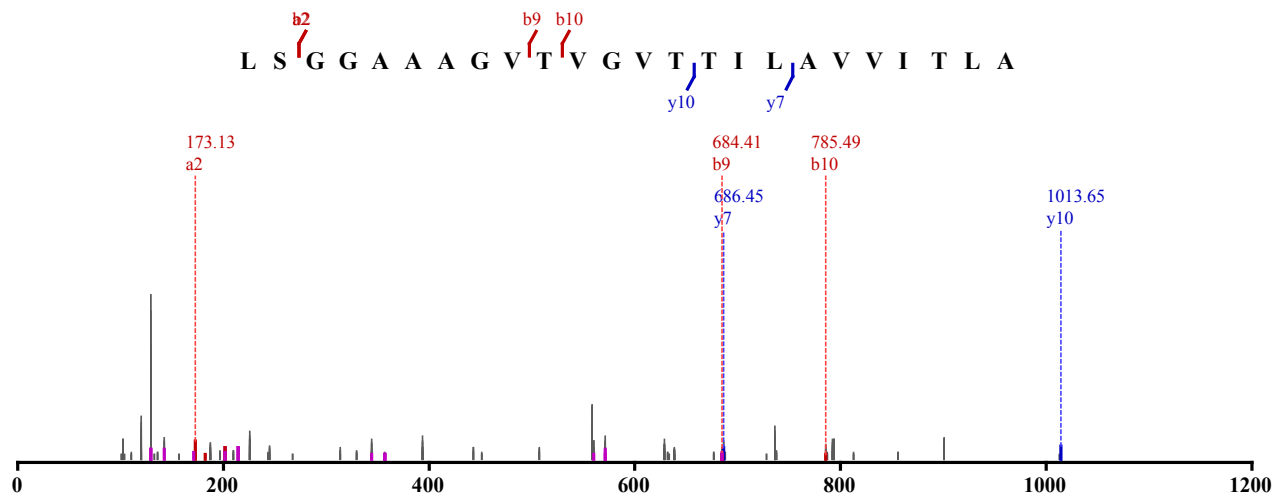

Not Modified

Identified in MSS144 with qvalue 0.00

Charge: 4, Exp. m/z: 539.576, Calc. m/z: 539.322

Data File: HeLa\_AspN-elastase\_HCD\_1, Scans: 31202 - 31202

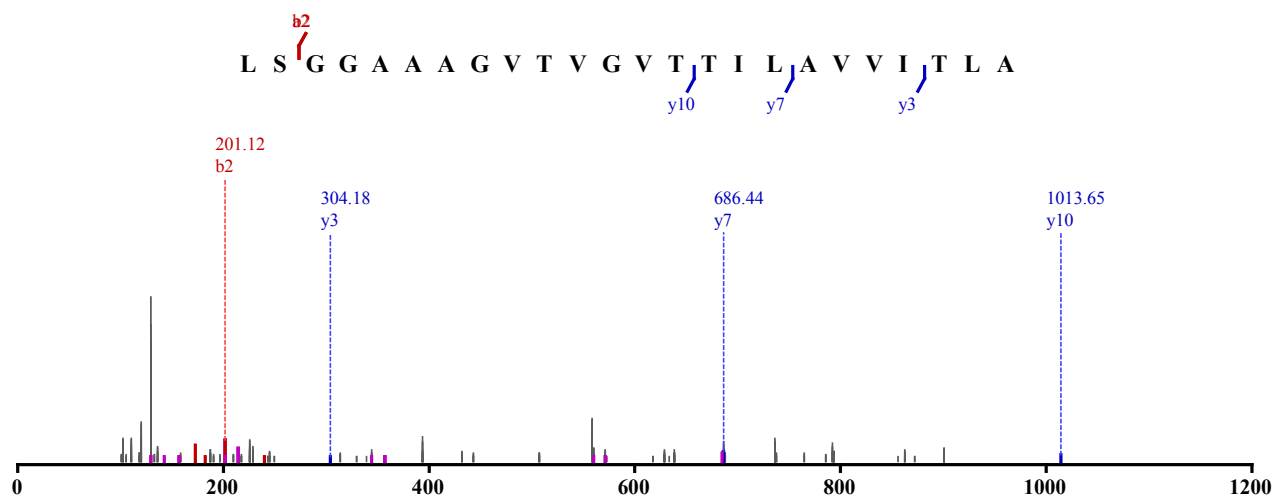

Not Modified

Identified in MSS144 with qvalue 0.00

Charge: 4, Exp. m/z: 539.577, Calc. m/z: 539.322

Data File: HeLa\_AspN-elastase\_HCD\_3, Scans: 27718 - 27718

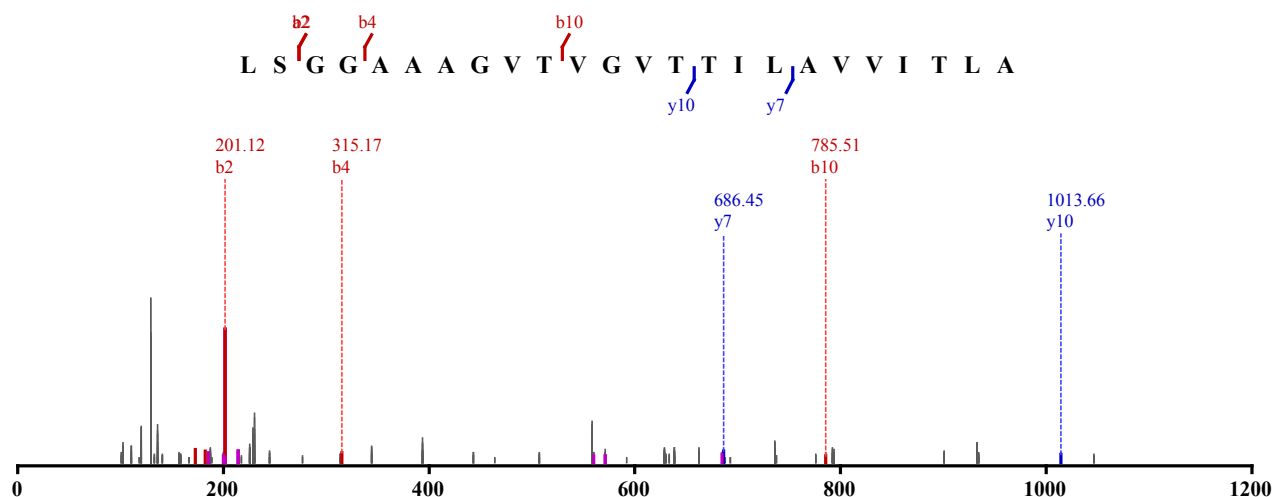

1 x Carbamidomethyl (C)

Identified in MSS481 with qvalue 0.00

Charge: 2, Exp. m/z: 719.830, Calc. m/z: 719.832



Data File: HeLa\_LysC\_pH11\_CID\_3xload\_2, Scans: 19239 - 19239

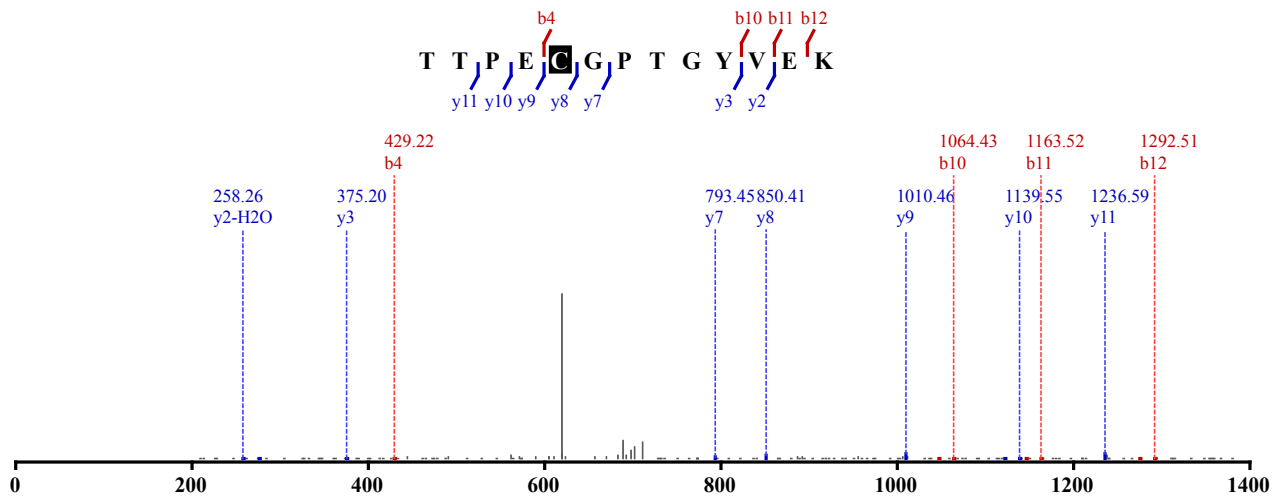

1 x Carbamidomethyl (C)  
 Identified in MSS485 with qvalue 0.00  
 Charge: 2, Exp. m/z: 719.829, Calc. m/z: 719.827  
 Data File: HeLa\_LysC\_pH11\_HCD\_1, Scans: 27648 - 27648

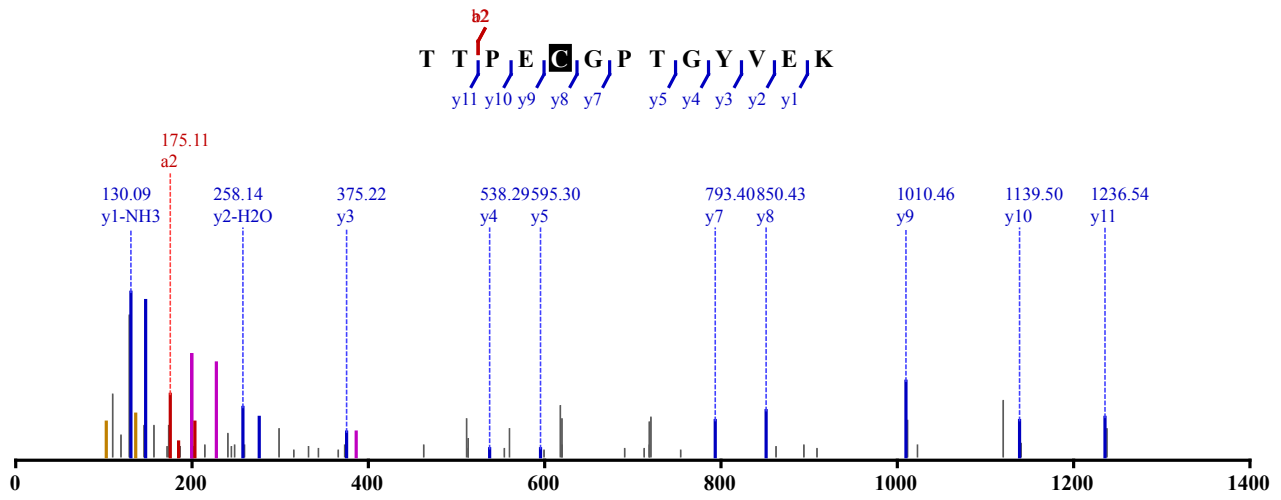

1 x Carbamidomethyl (C)  
 Identified in MSS485 with qvalue 0.00  
 Charge: 2, Exp. m/z: 719.830, Calc. m/z: 719.827  
 Data File: HeLa\_LysC\_pH8\_HCD\_2, Scans: 22930 - 22930

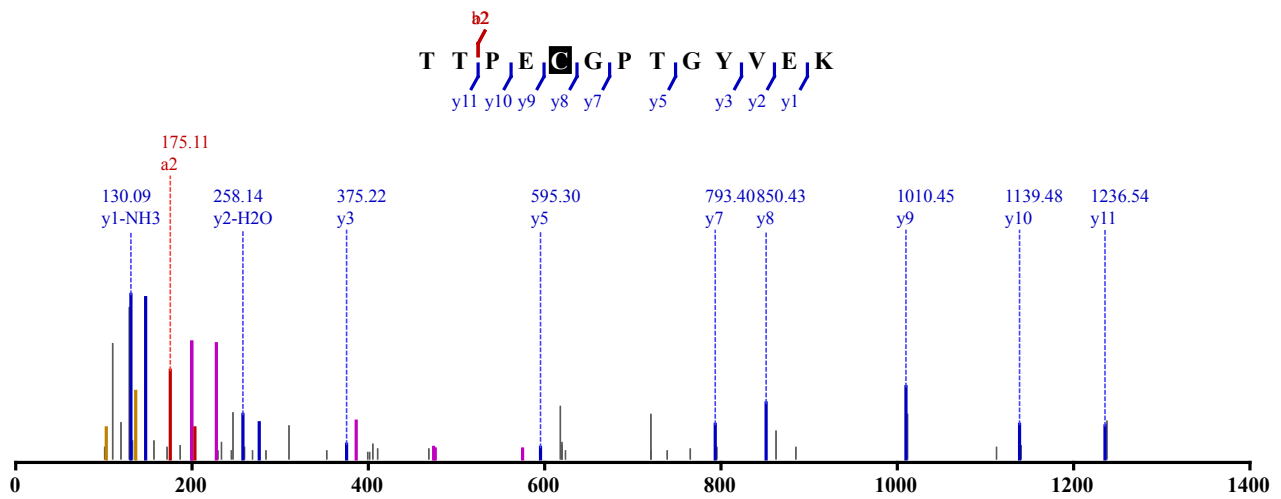

1 x Carbamidomethyl (C)

Identified in MSS485 with qvalue 0.00  
 Charge: 2, Exp. m/z: 719.829, Calc. m/z: 719.827  
 Data File: HeLa\_LysC\_pH8\_HCD\_3, Scans: 22895 - 22895

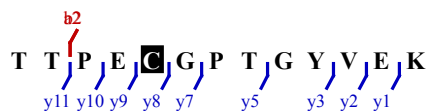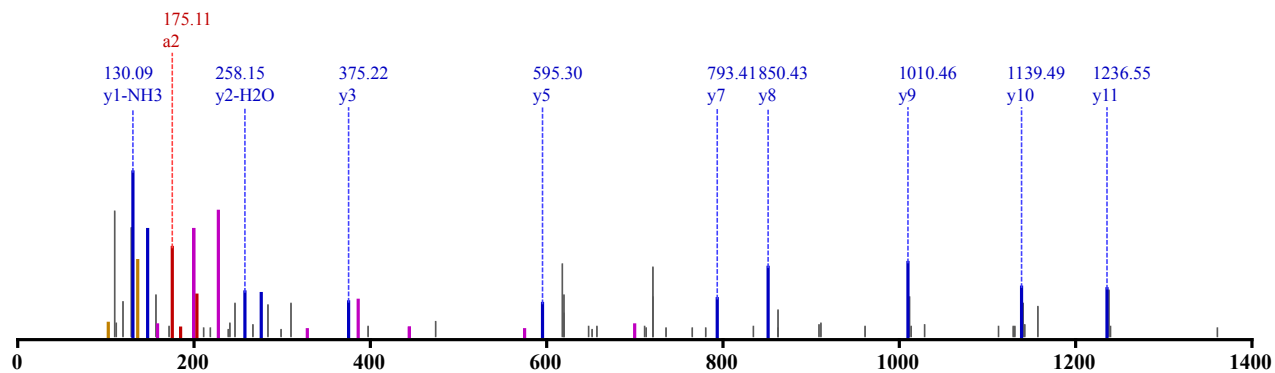

1 x Carbamidomethyl (C)  
 Identified in MSS485 with qvalue 0.00  
 Charge: 2, Exp. m/z: 719.830, Calc. m/z: 719.832  
 Data File: HeLa\_LysC\_pH11\_HCD\_2, Scans: 25837 - 25837

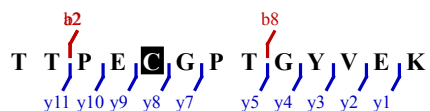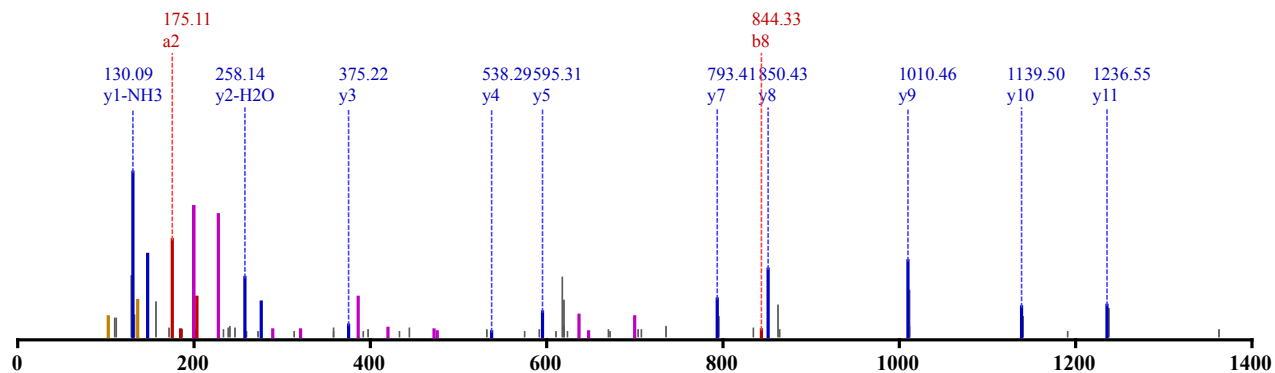

1 x Carbamidomethyl (C)  
 Identified in MSS485 with qvalue 0.01  
 Charge: 2, Exp. m/z: 719.813, Calc. m/z: 719.827  
 Data File: HeLa\_LysC\_80pcACN\_HCD\_1, Scans: 31342 - 31342

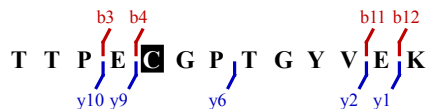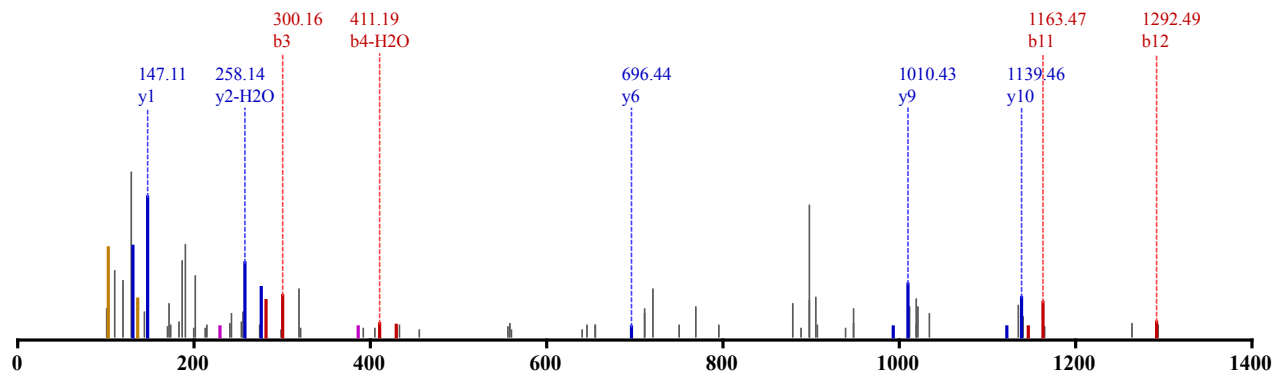

1 x Carbamidomethyl (C)  
 Identified in MSS485 with qvalue 0.01  
 Charge: 2, Exp. m/z: 719.812, Calc. m/z: 719.827  
 Data File: HeLa\_LysC\_pH2\_HCD\_1, Scans: 27390 - 27390

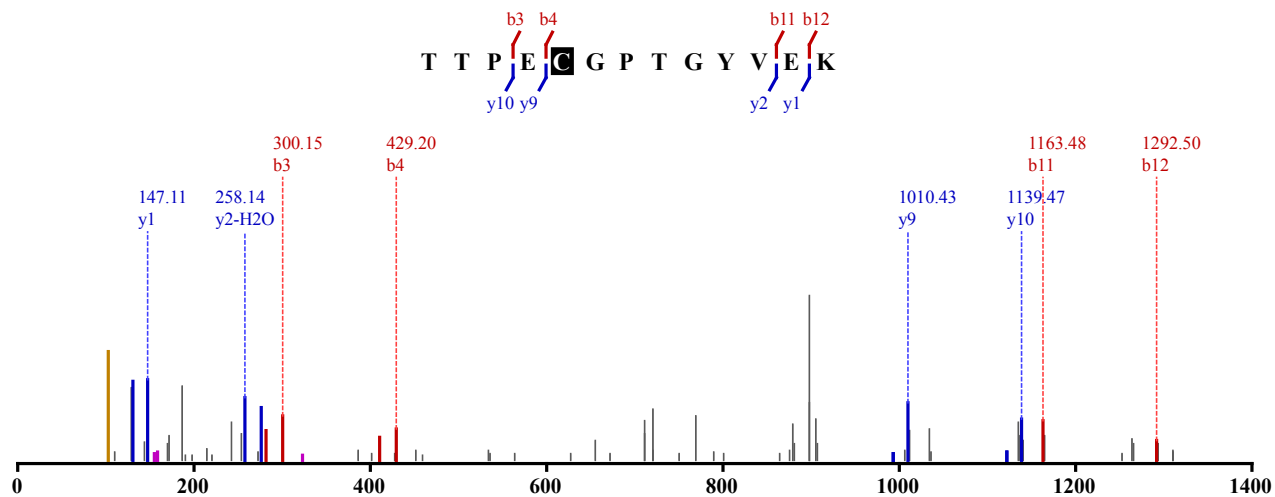

1 x Carbamidomethyl (C)  
 Identified in MSS485 with qvalue 0.01  
 Charge: 2, Exp. m/z: 719.812, Calc. m/z: 719.827  
 Data File: HeLa\_LysC\_pH3\_HCD\_1, Scans: 30924 - 30924

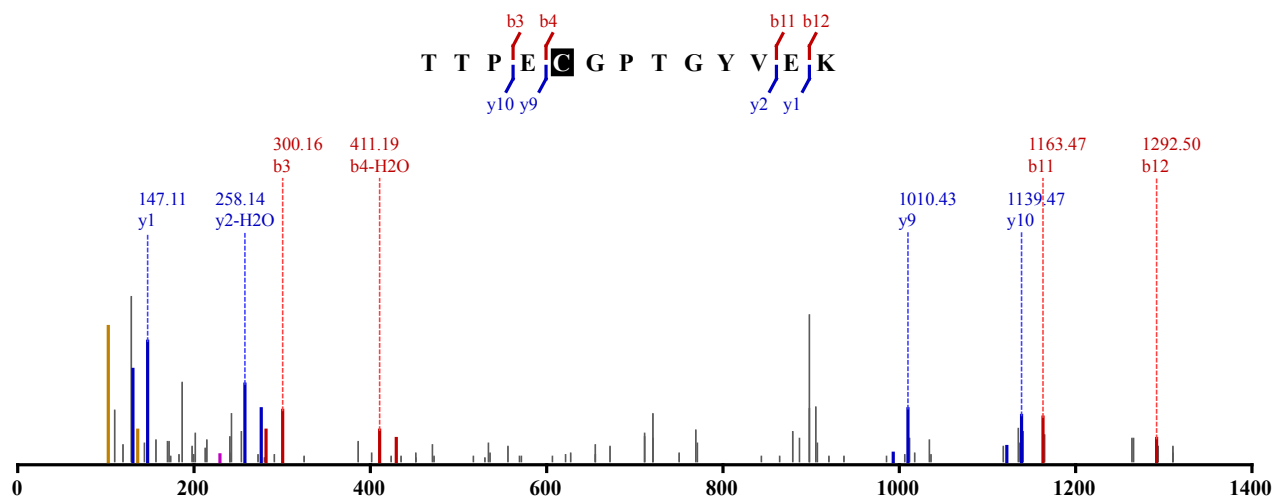

1 x Carbamidomethyl (C)  
 Identified in MSS485 with qvalue 0.01  
 Charge: 2, Exp. m/z: 719.812, Calc. m/z: 719.827  
 Data File: HeLa\_LysC\_pH3\_HCD\_1, Scans: 31084 - 31084

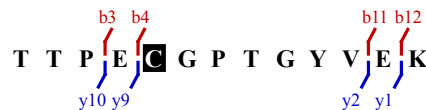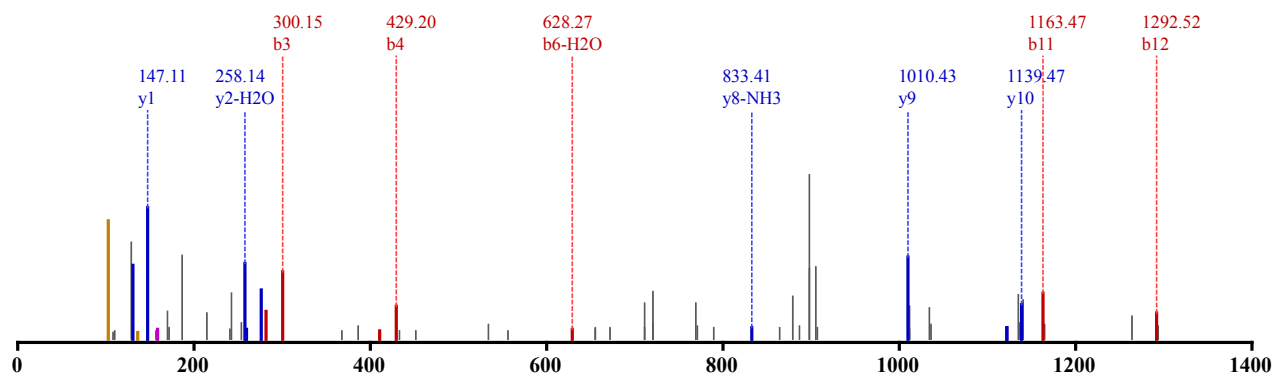

Not Modified  
 Identified in MSS481 with qvalue 0.00  
 Charge: 2, Exp. m/z: 627.814, Calc. m/z: 627.812  
 Data File: HeLa\_LysC\_pH6\_CID\_3xload\_3, Scans: 13417 - 13417

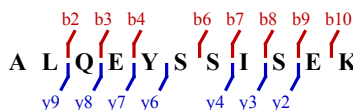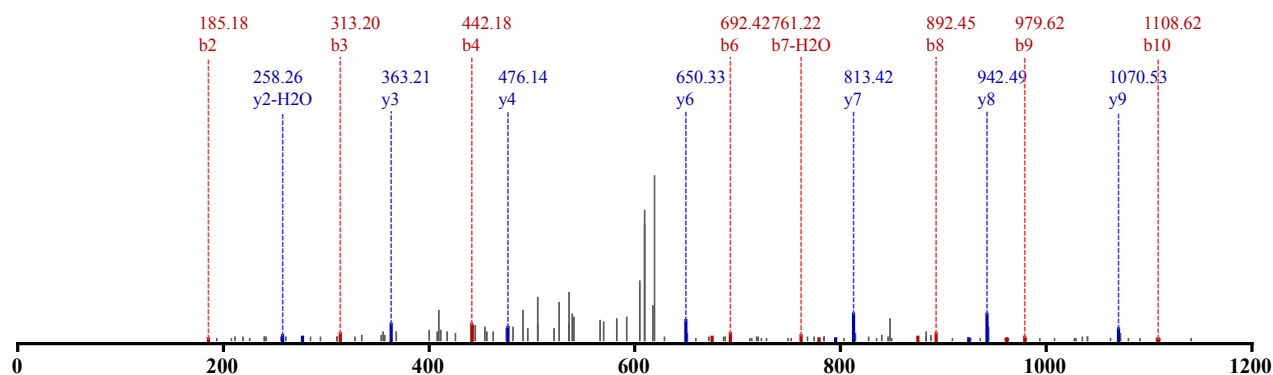

Not Modified  
 Identified in MSS481 with qvalue 0.00  
 Charge: 2, Exp. m/z: 627.817, Calc. m/z: 627.812  
 Data File: HeLa\_LysC\_pH6\_CID\_3xload\_2, Scans: 12831 - 12831

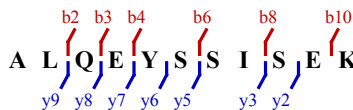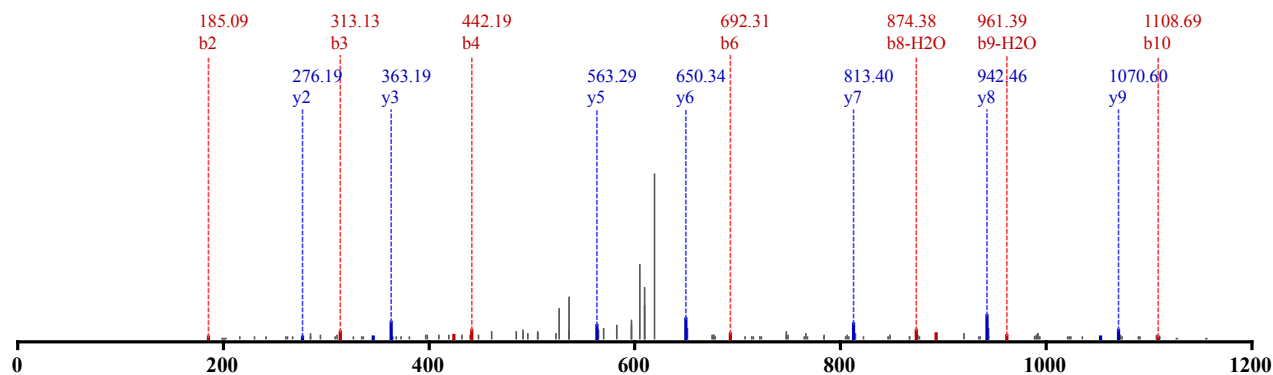

Not Modified  
 Identified in MSS481 with qvalue 0.00  
 Charge: 2, Exp. m/z: 628.314, Calc. m/z: 627.812

Data File: HeLa\_LysC\_pH8\_CID\_3xload\_3, Scans: 19384 - 19384

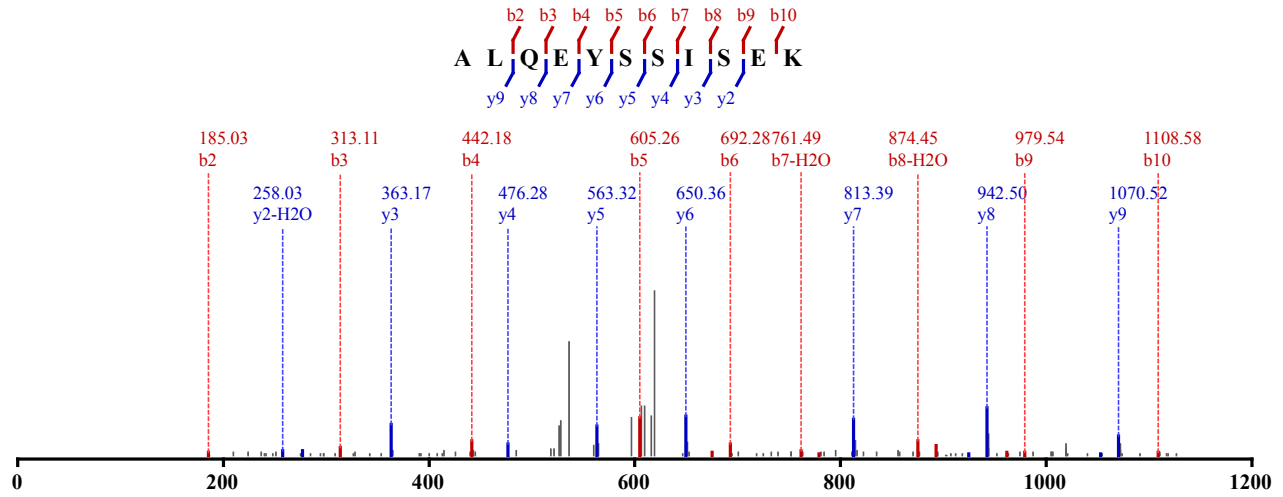

Not Modified

Identified in MSS481 with qvalue 0.00

Charge: 2, Exp. m/z: 627.815, Calc. m/z: 627.812

Data File: HeLa\_LysC\_pH8\_CID\_3xload\_2, Scans: 16374 - 16374

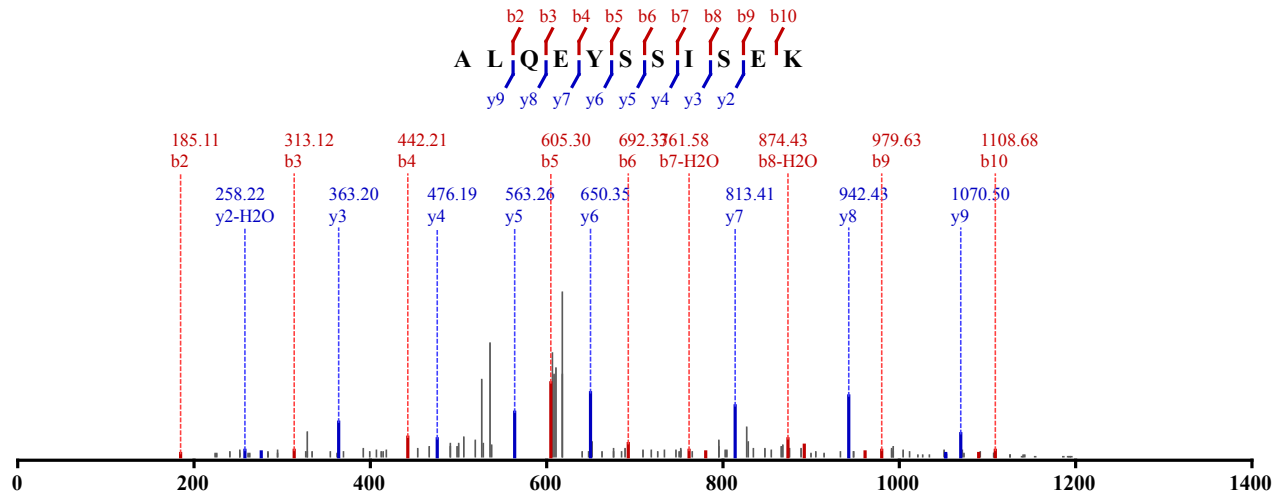

Not Modified

Identified in MSS484 with qvalue 0.00

Charge: 2, Exp. m/z: 627.815, Calc. m/z: 627.812

Data File: HeLa\_Try\_pH6\_HCD\_2, Scans: 23327 - 23327

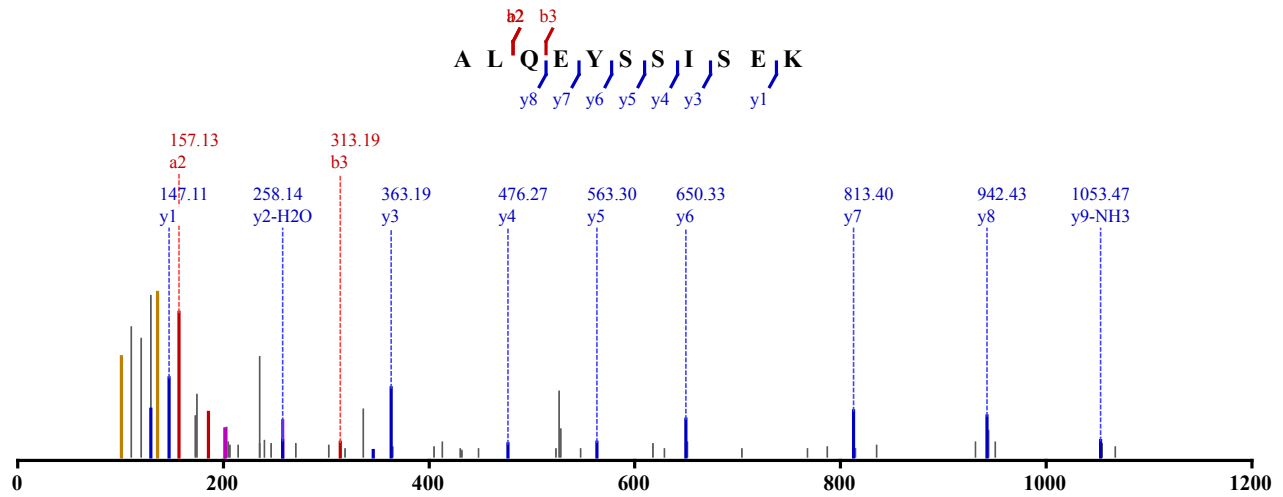

Not Modified

Identified in MSS484 with qvalue 0.01  
 Charge: 2, Exp. m/z: 627.814, Calc. m/z: 627.812  
 Data File: HeLa\_Try\_pH6\_HCD\_3, Scans: 23559 - 23559

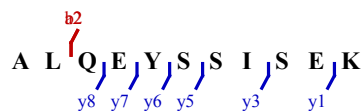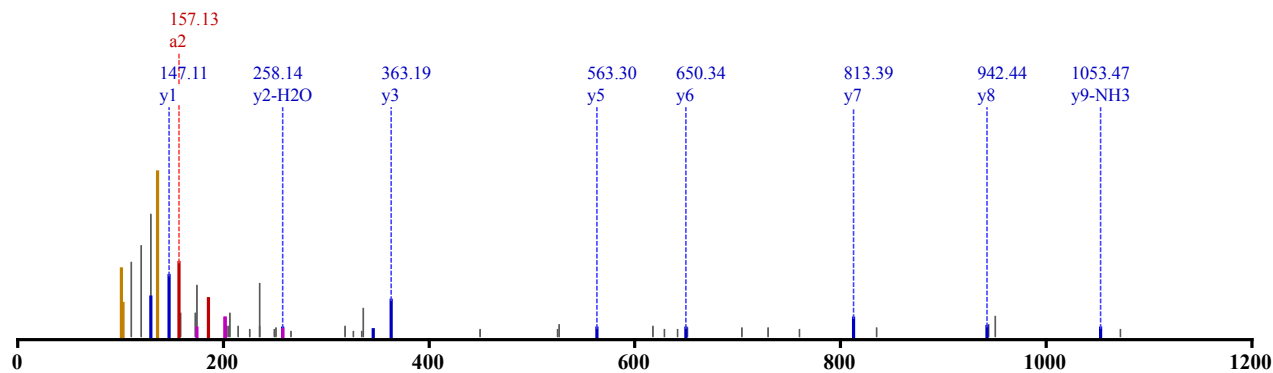

Not Modified  
 Identified in MSS484 with qvalue 0.00  
 Charge: 2, Exp. m/z: 627.814, Calc. m/z: 627.812  
 Data File: HeLa\_Try\_pH8\_HCD\_3, Scans: 24285 - 24285

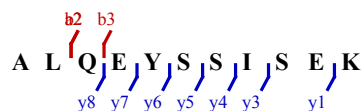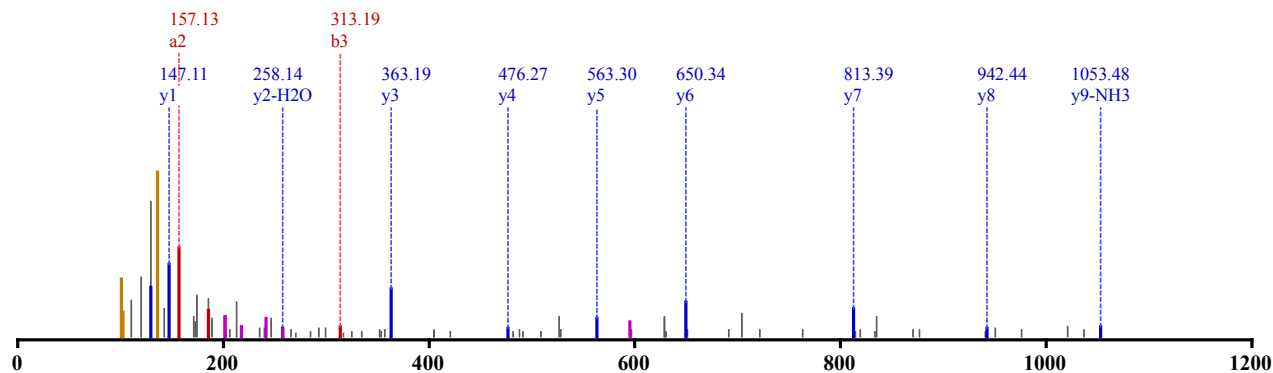

Not Modified  
 Identified in MSS485 with qvalue 0.00  
 Charge: 2, Exp. m/z: 627.814, Calc. m/z: 627.812  
 Data File: HeLa\_LysC\_pH8\_HCD\_3, Scans: 24104 - 24104

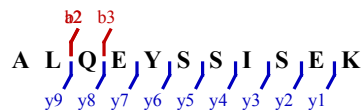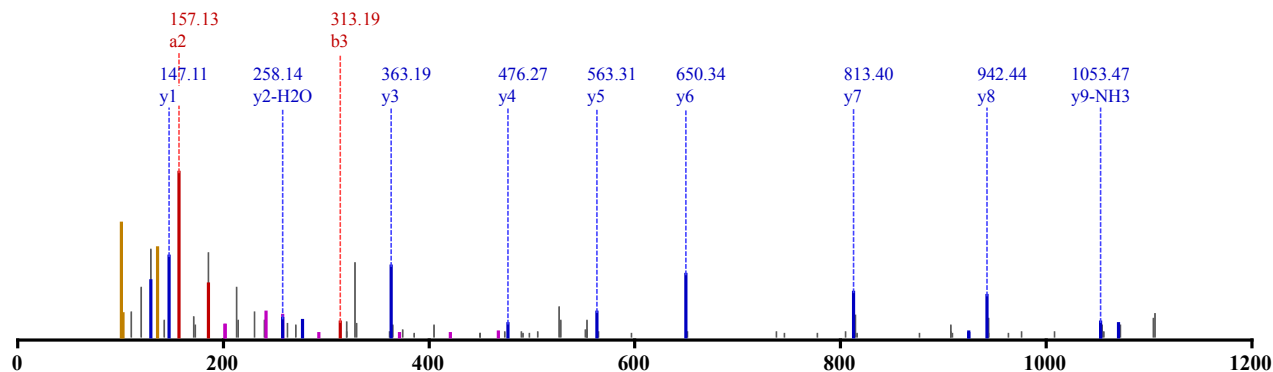

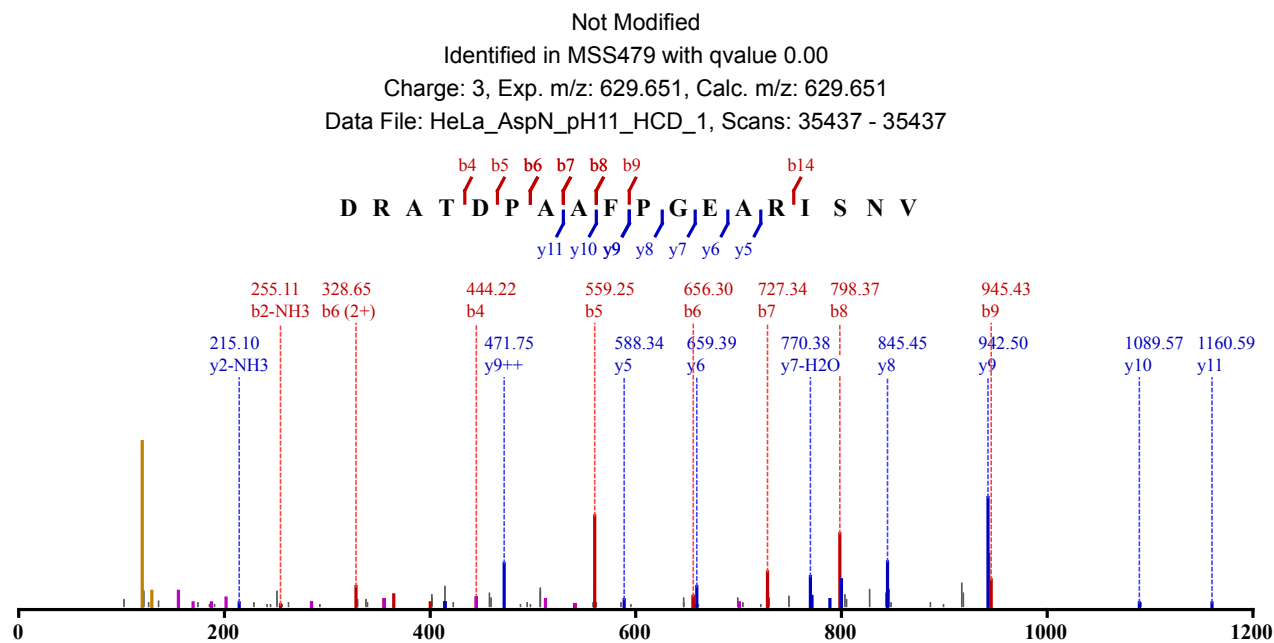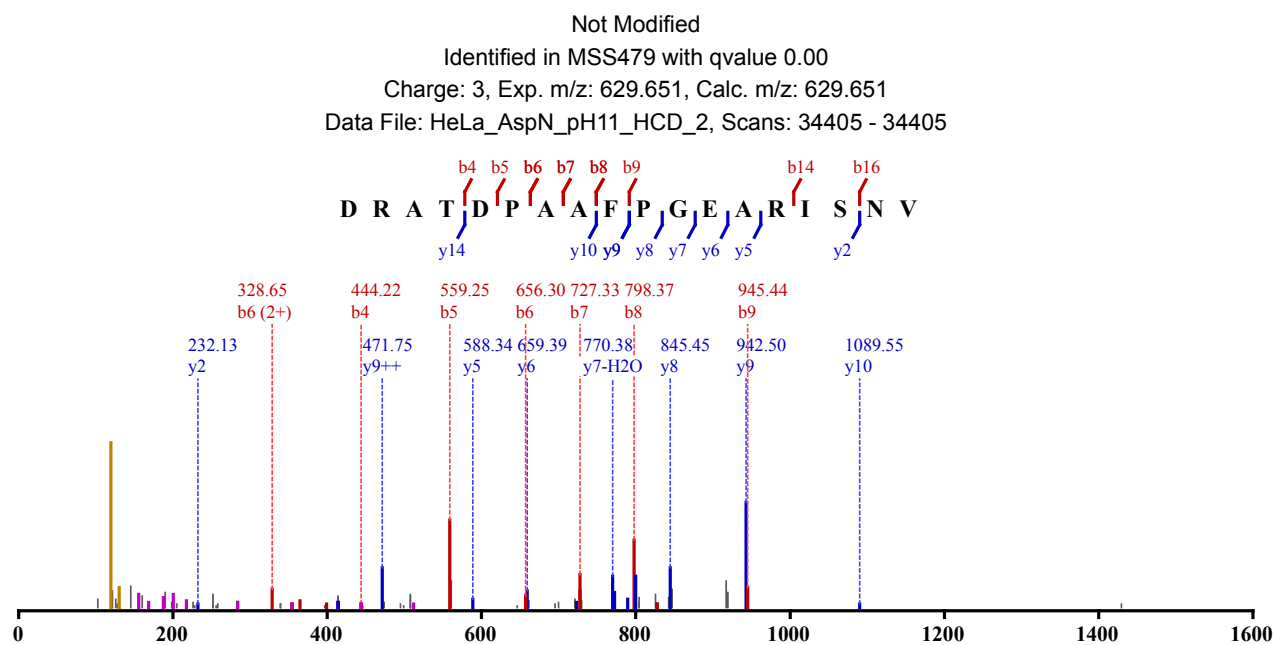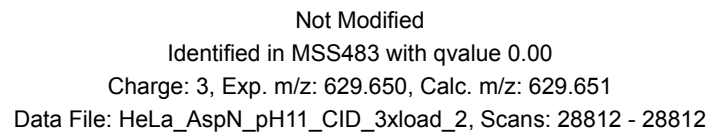

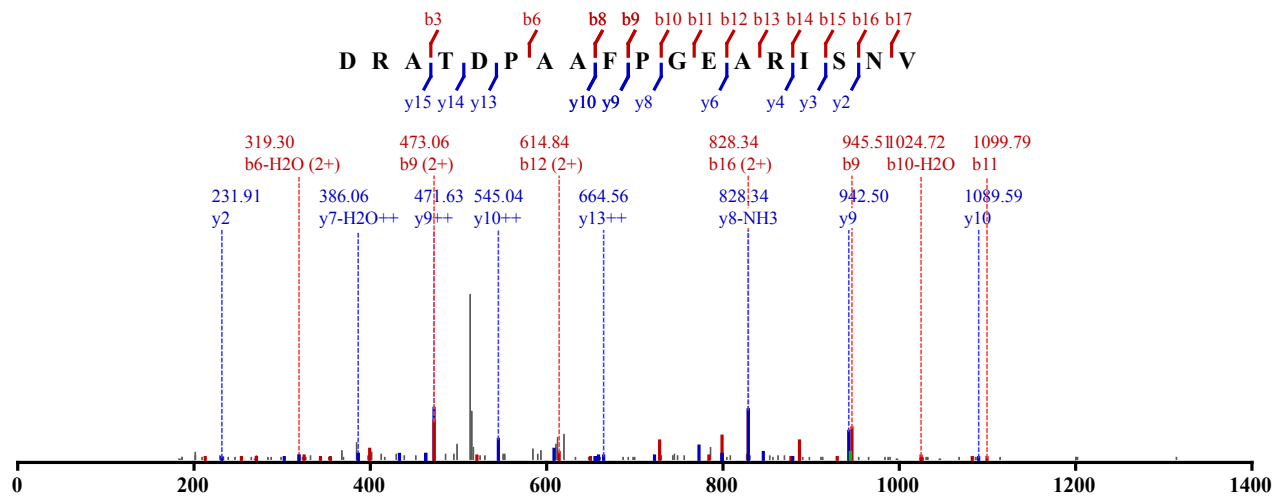

Not Modified  
 Identified in MSS483 with qvalue 0.00  
 Charge: 3, Exp. m/z: 629.651, Calc. m/z: 629.651  
 Data File: HeLa\_AspN\_pH11\_CID\_3xload, Scans: 28126 - 28126

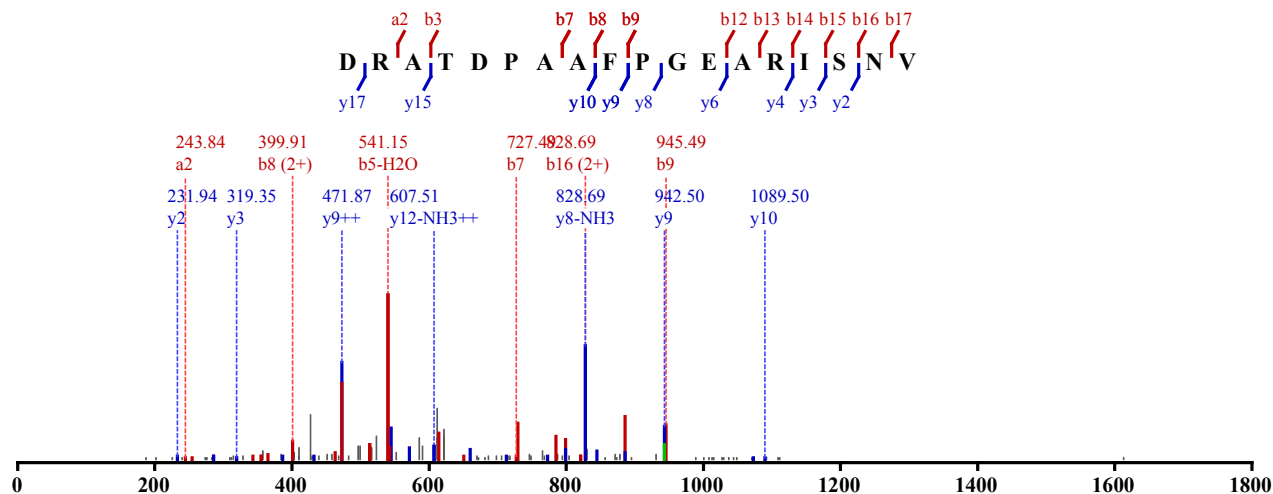

Not Modified  
 Identified in MSS484 with qvalue 0.00  
 Charge: 3, Exp. m/z: 506.571, Calc. m/z: 506.571  
 Data File: HeLa\_Try\_pH8\_HCD\_1, Scans: 20113 - 20113

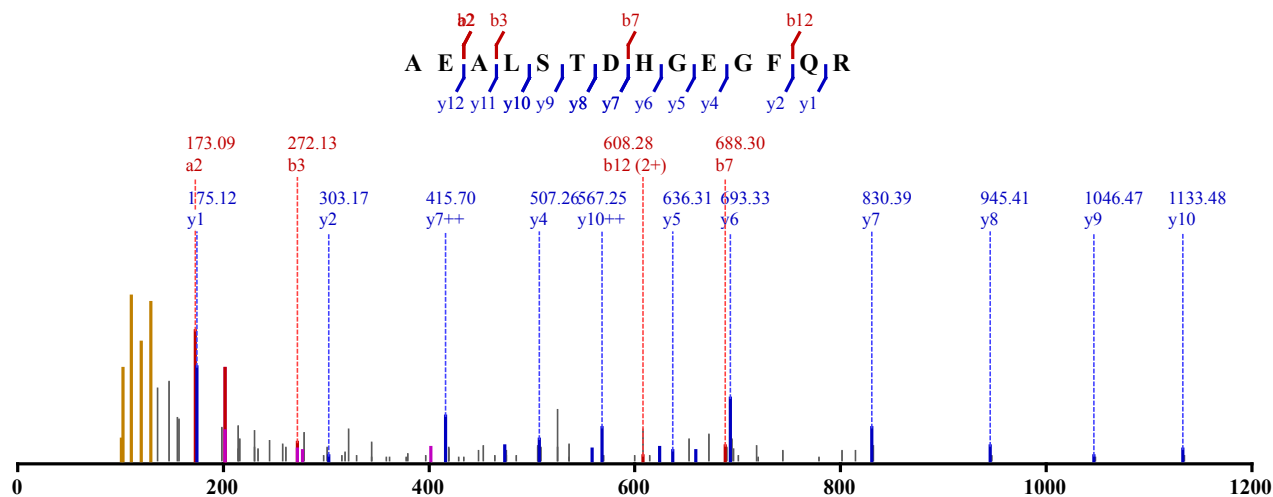

Not Modified  
 Identified in MSS484 with qvalue 0.00  
 Charge: 2, Exp. m/z: 704.831, Calc. m/z: 704.832



Data File: HeLa\_Try\_pH4\_HCD\_1, Scans: 44915 - 44915

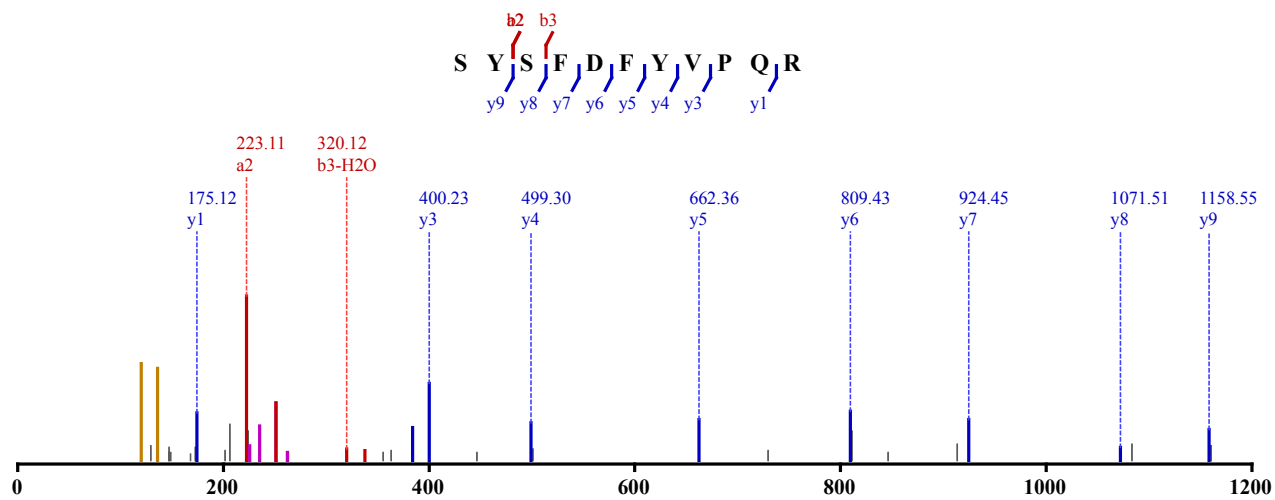

Not Modified

Identified in MSS484 with qvalue 0.00

Charge: 2, Exp. m/z: 704.830, Calc. m/z: 704.832

Data File: HeLa\_Try\_pH4\_HCD\_2, Scans: 44221 - 44221

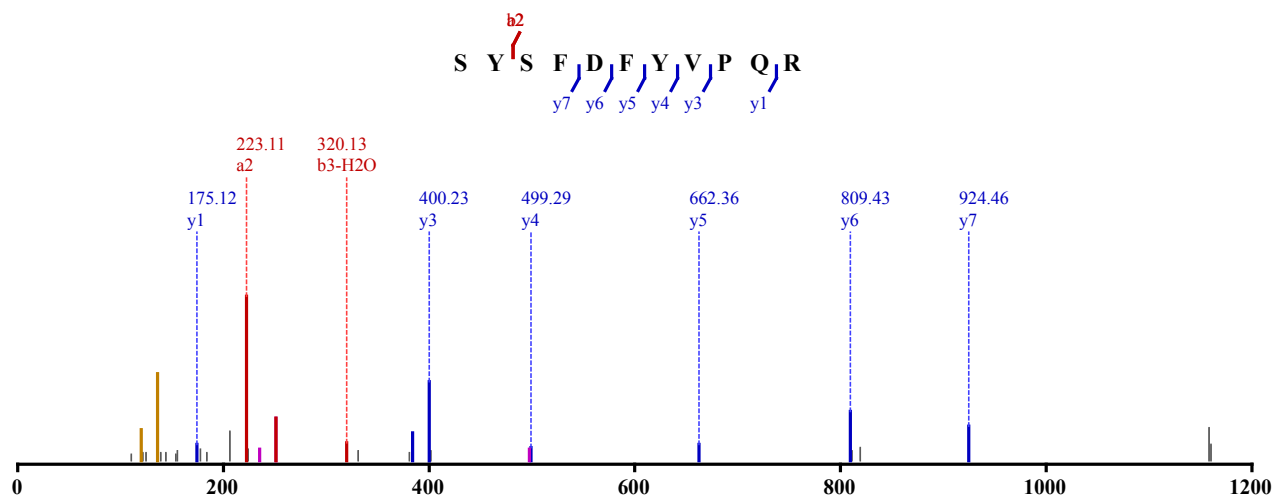

Not Modified

Identified in MSS487 with qvalue 0.00

Charge: 2, Exp. m/z: 487.295, Calc. m/z: 487.295

Data File: HeLa\_ArgC-Try\_pH3\_HCD\_2, Scans: 43510 - 43510

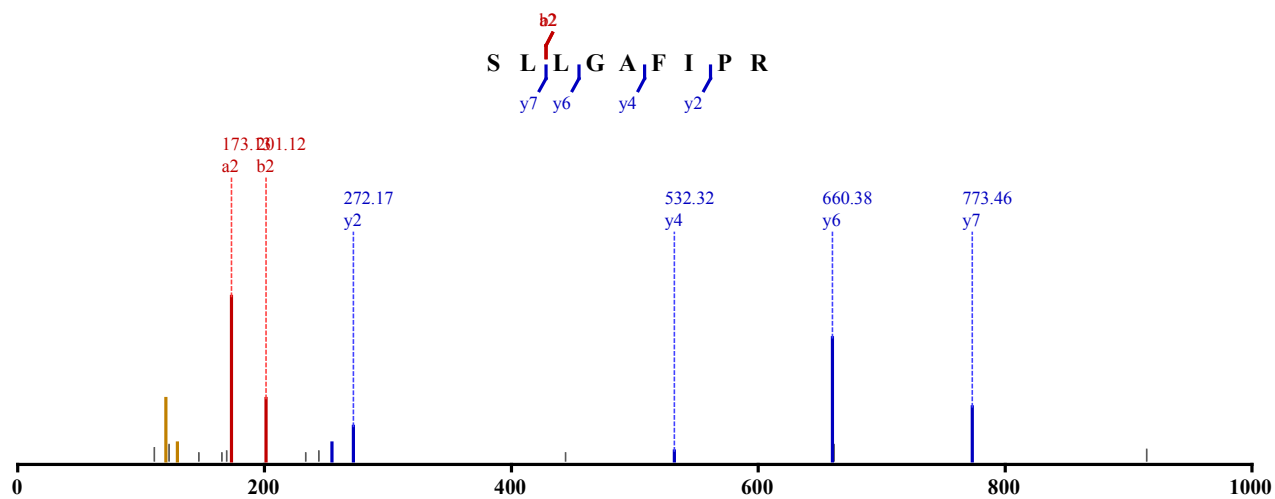

Not Modified

Identified in MSS487 with qvalue 0.00  
 Charge: 2, Exp. m/z: 487.295, Calc. m/z: 487.295  
 Data File: HeLa\_ArgC-Try\_pH3\_HCD\_1, Scans: 39017 - 39017

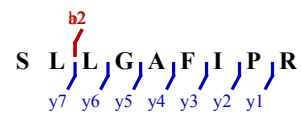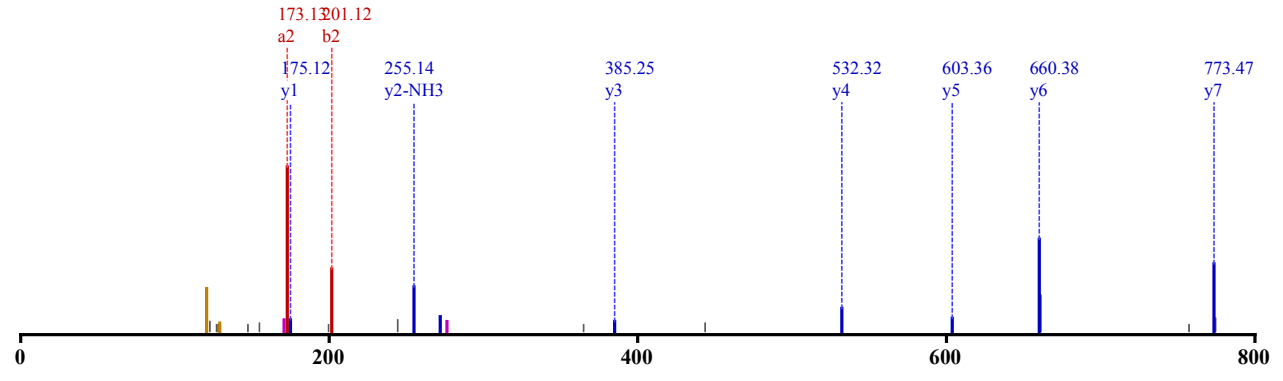

Not Modified  
 Identified in MSS487 with qvalue 0.00  
 Charge: 2, Exp. m/z: 487.294, Calc. m/z: 487.295  
 Data File: HeLa\_ArgC-Try\_pH3\_HCD\_2, Scans: 43421 - 43421

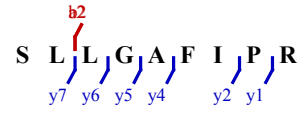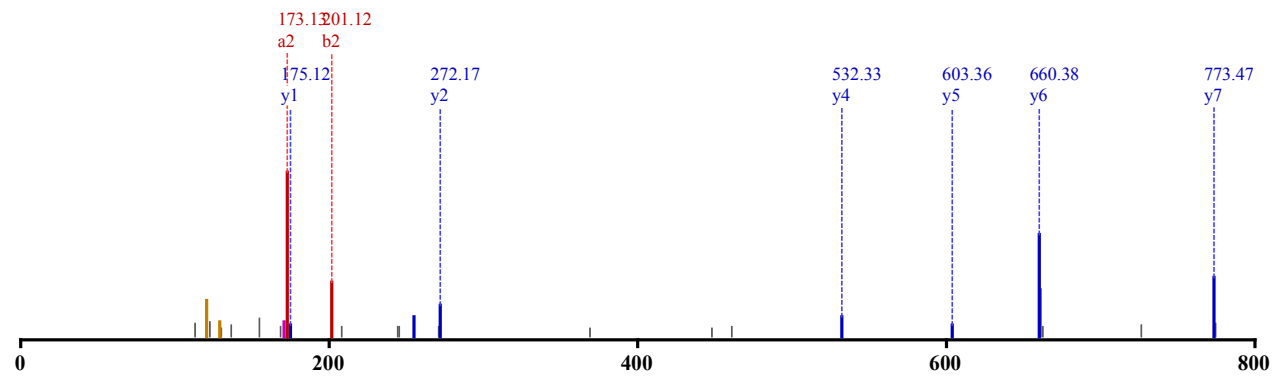

Not Modified  
 Identified in MSS487 with qvalue 0.00  
 Charge: 2, Exp. m/z: 487.296, Calc. m/z: 487.295  
 Data File: HeLa\_ArgC-Try\_pH3\_HCD\_3, Scans: 44024 - 44024

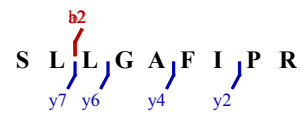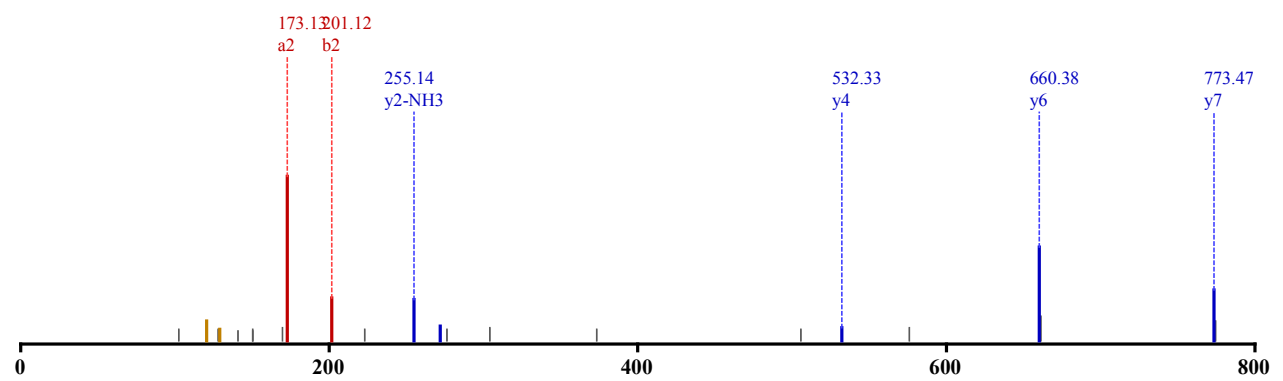

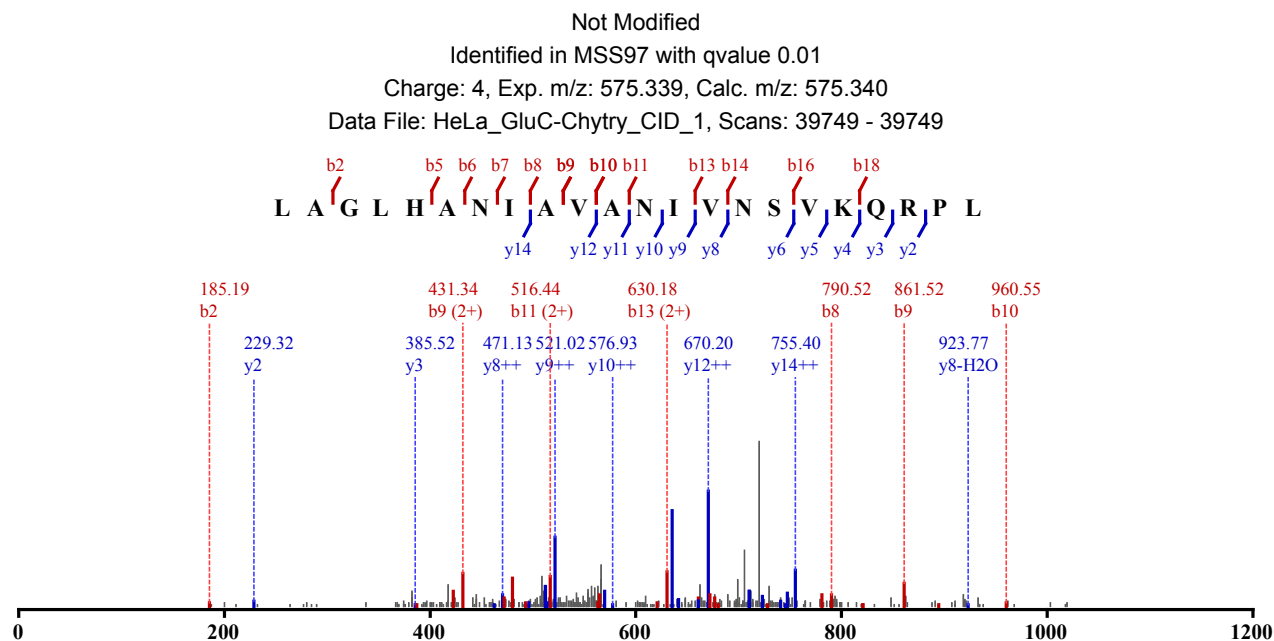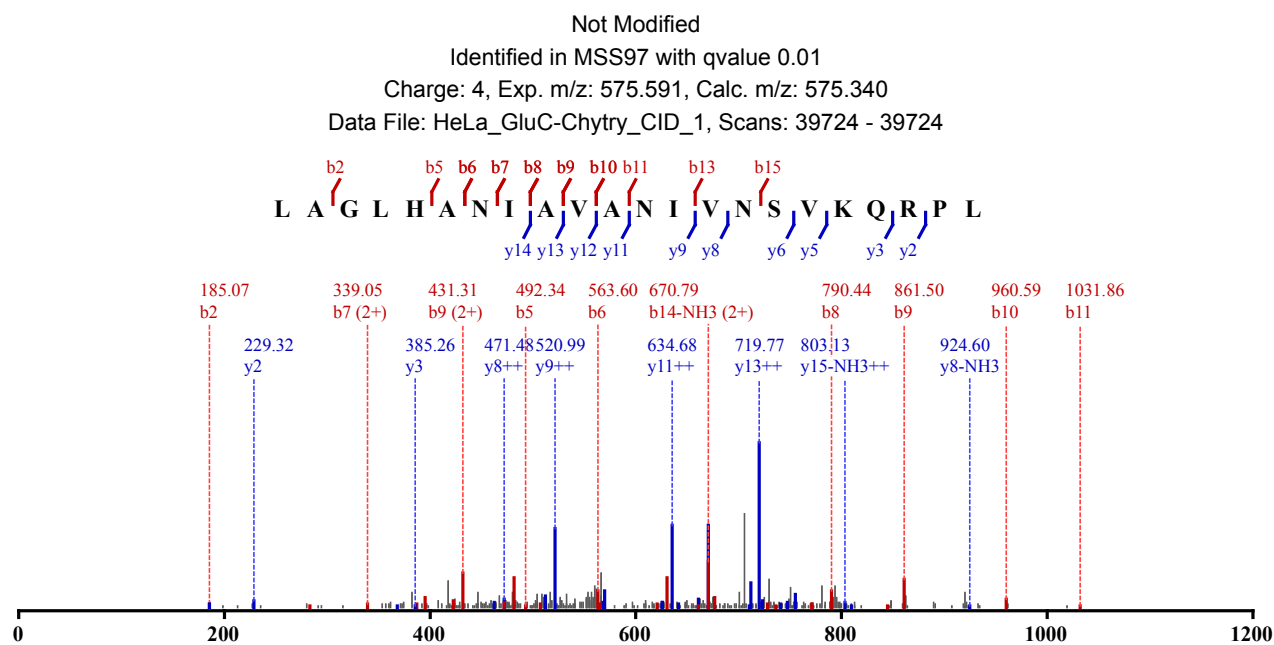

Not Modified  
 Identified in MSS149 with qvalue 0.00  
 Charge: 4, Exp. m/z: 575.341, Calc. m/z: 575.340  
 Data File: HeLa\_Chtry\_CID\_1, Scans: 35478 - 35478

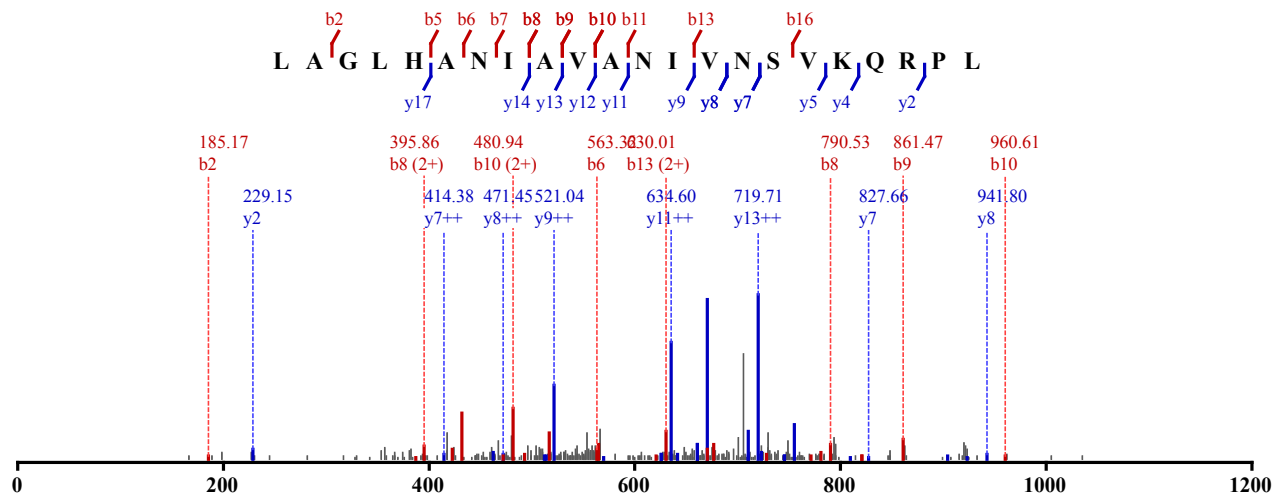

Not Modified  
 Identified in MSS484 with qvalue 0.00  
 Charge: 2, Exp. m/z: 1050.530, Calc. m/z: 1050.032  
 Data File: HeLa\_Try\_pH3\_HCD\_1, Scans: 53004 - 53004

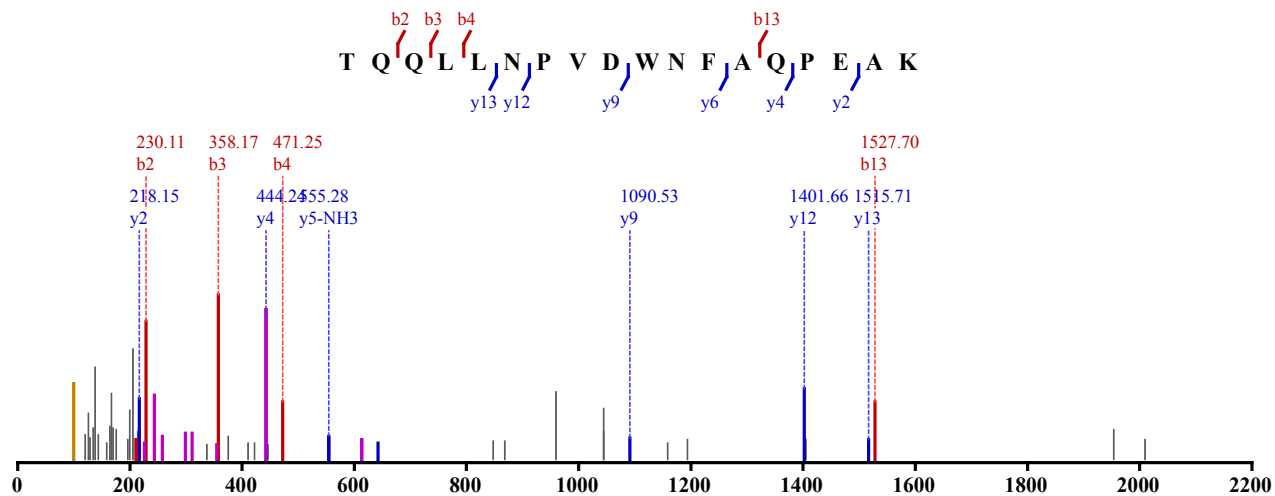

Not Modified  
 Identified in MSS484 with qvalue 0.00  
 Charge: 2, Exp. m/z: 1050.030, Calc. m/z: 1050.032  
 Data File: HeLa\_Try\_pH3\_HCD\_3, Scans: 51141 - 51141

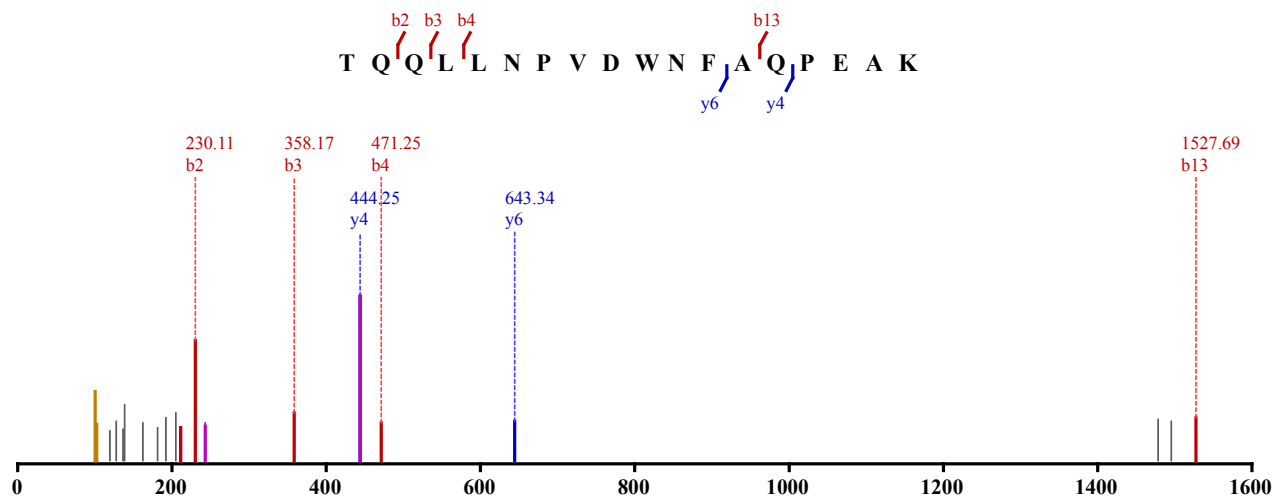

Not Modified  
 Identified in MSS484 with qvalue 0.00  
 Charge: 2, Exp. m/z: 1050.030, Calc. m/z: 1050.032

Data File: HeLa\_Try\_pH3\_HCD\_2, Scans: 52834 - 52834

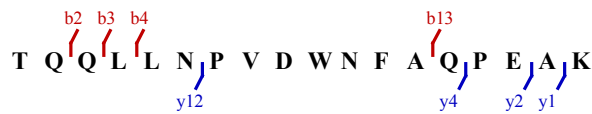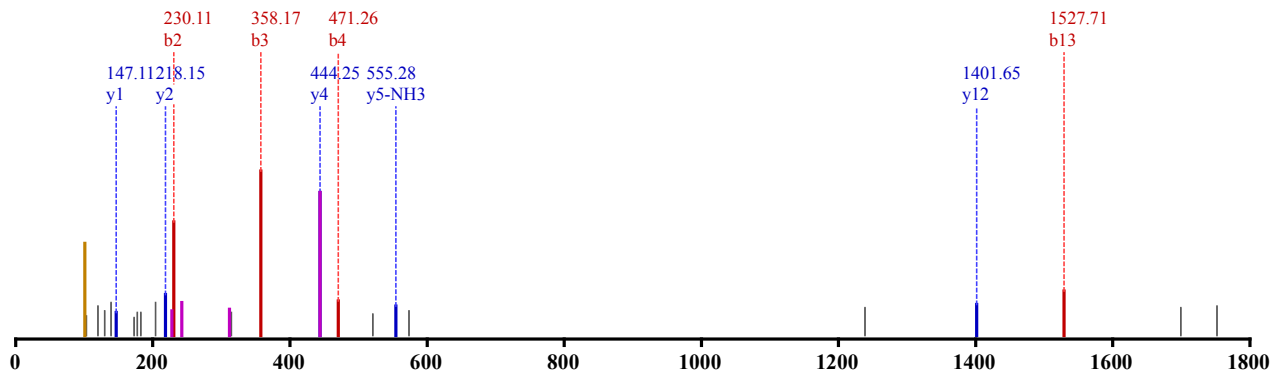

Not Modified

Identified in MSS485 with qvalue 0.00

Charge: 3, Exp. m/z: 700.357, Calc. m/z: 700.357

Data File: HeLa\_LysC\_pH3\_HCD\_2, Scans: 51547 - 51547

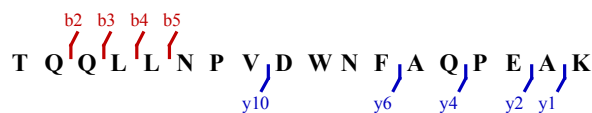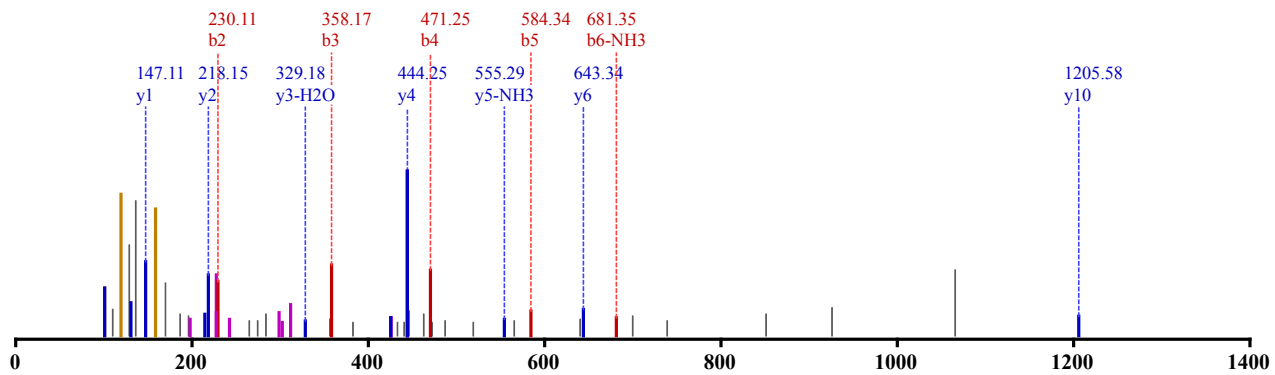

Not Modified

Identified in MSS484 with qvalue 0.00

Charge: 2, Exp. m/z: 548.809, Calc. m/z: 548.807

Data File: HeLa\_Try\_80pcACN\_HCD\_3, Scans: 17891 - 17891

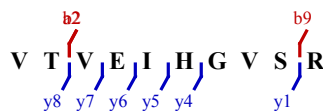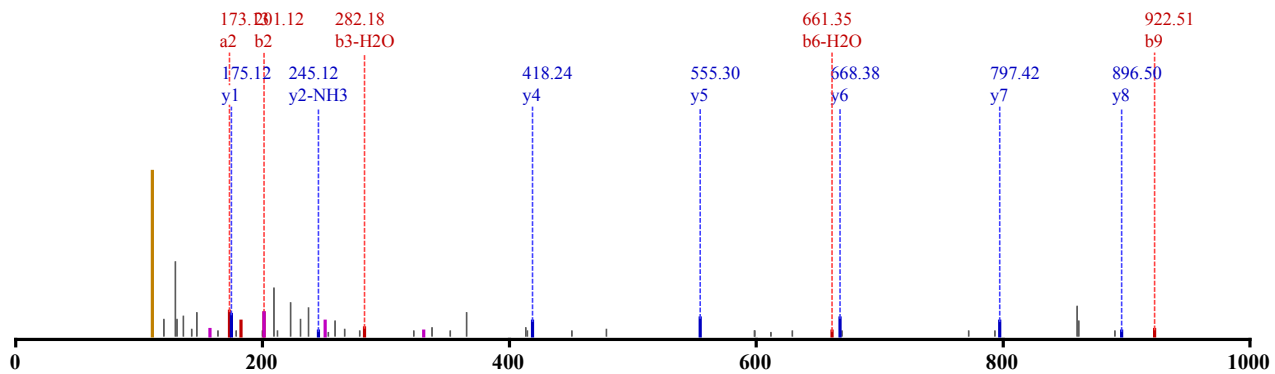

Not Modified

Identified in MSS484 with qvalue 0.00

Charge: 3, Exp. m/z: 366.209, Calc. m/z: 366.207

Data File: HeLa\_Try\_80pcACN\_HCD\_3, Scans: 17872 - 17872

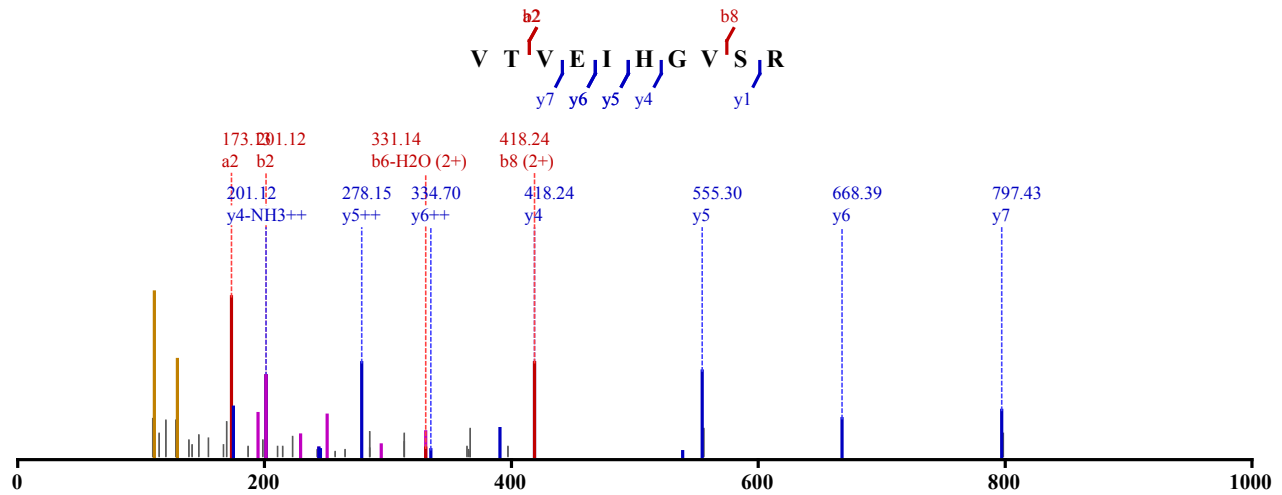

Not Modified

Identified in MSS484 with qvalue 0.00

Charge: 3, Exp. m/z: 366.209, Calc. m/z: 366.207

Data File: HeLa\_Try\_80pcACN\_HCD\_2, Scans: 18599 - 18599

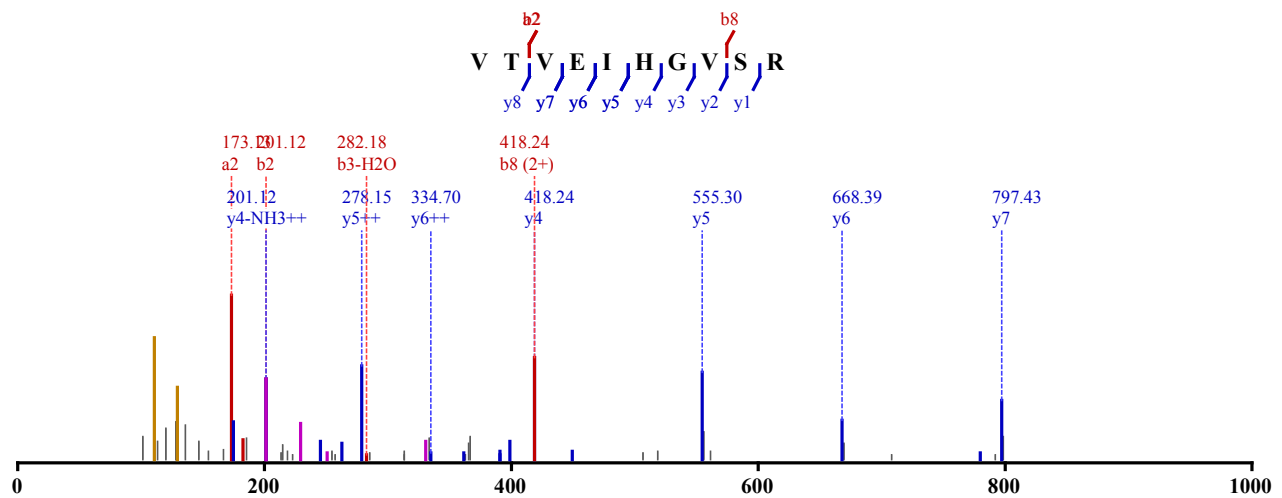

Not Modified

Identified in MSS487 with qvalue 0.00

Charge: 3, Exp. m/z: 366.208, Calc. m/z: 366.207

Data File: HeLa\_ArgC-Try\_80pcACN\_HCD\_1, Scans: 15136 - 15136

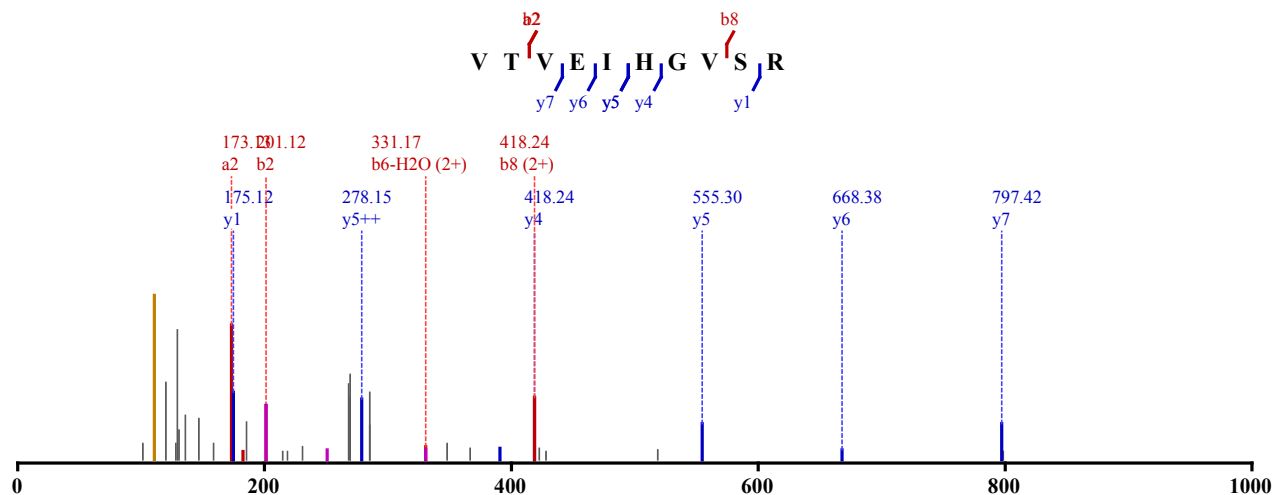

Not Modified  
 Identified in MSS487 with qvalue 0.00  
 Charge: 2, Exp. m/z: 548.808, Calc. m/z: 548.807  
 Data File: HeLa\_ArgC-Try\_80pcACN\_HCD\_1, Scans: 15141 - 15141

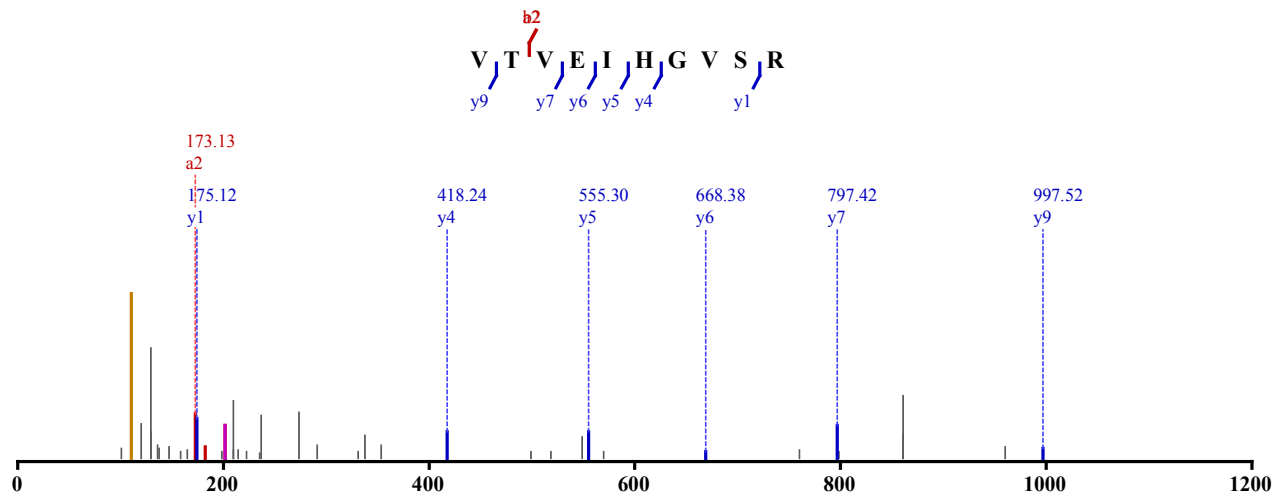

Not Modified  
 Identified in MSS479 with qvalue 0.00  
 Charge: 3, Exp. m/z: 673.682, Calc. m/z: 673.684  
 Data File: HeLa\_AspN\_pH8\_HCD\_2, Scans: 25123 - 25123

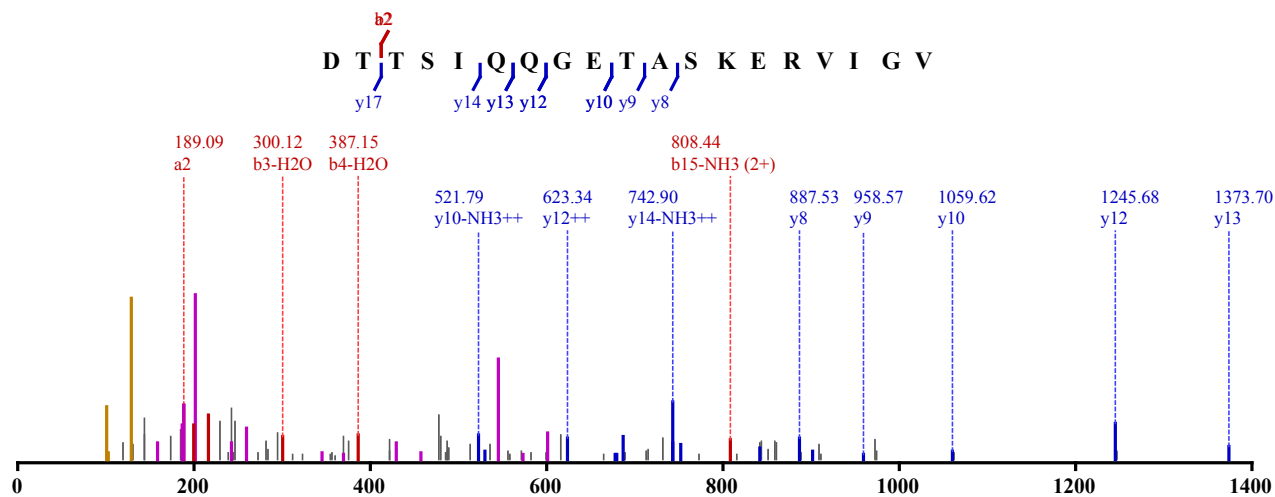

Not Modified  
 Identified in MSS479 with qvalue 0.00  
 Charge: 3, Exp. m/z: 673.683, Calc. m/z: 673.684  
 Data File: HeLa\_AspN\_pH8\_HCD\_1, Scans: 25859 - 25859

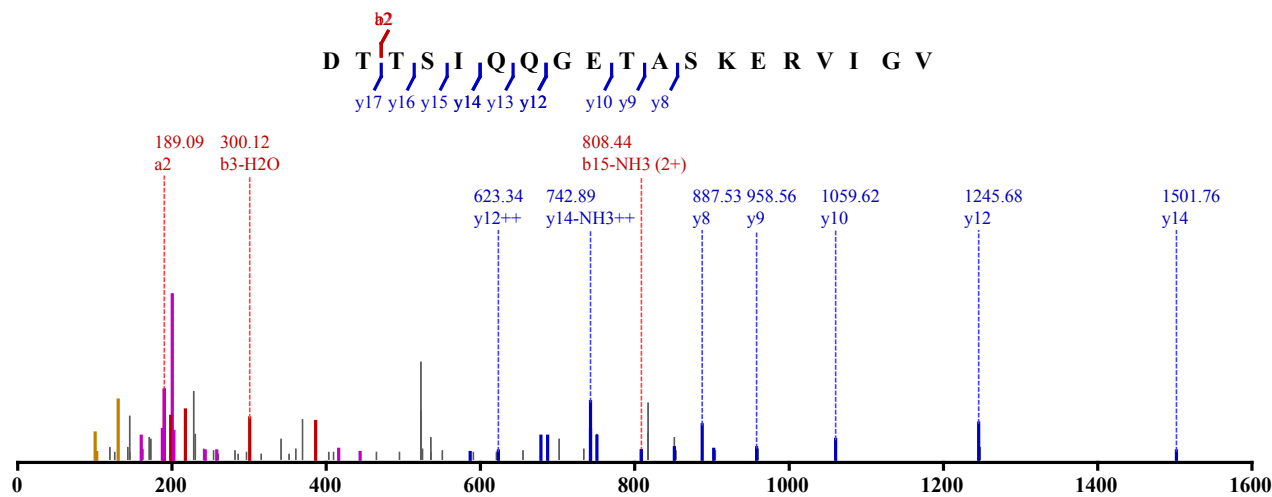

Not Modified  
 Identified in MSS479 with qvalue 0.00  
 Charge: 3, Exp. m/z: 673.684, Calc. m/z: 673.684  
 Data File: HeLa\_AspN\_pH11\_HCD\_1, Scans: 28430 - 28430

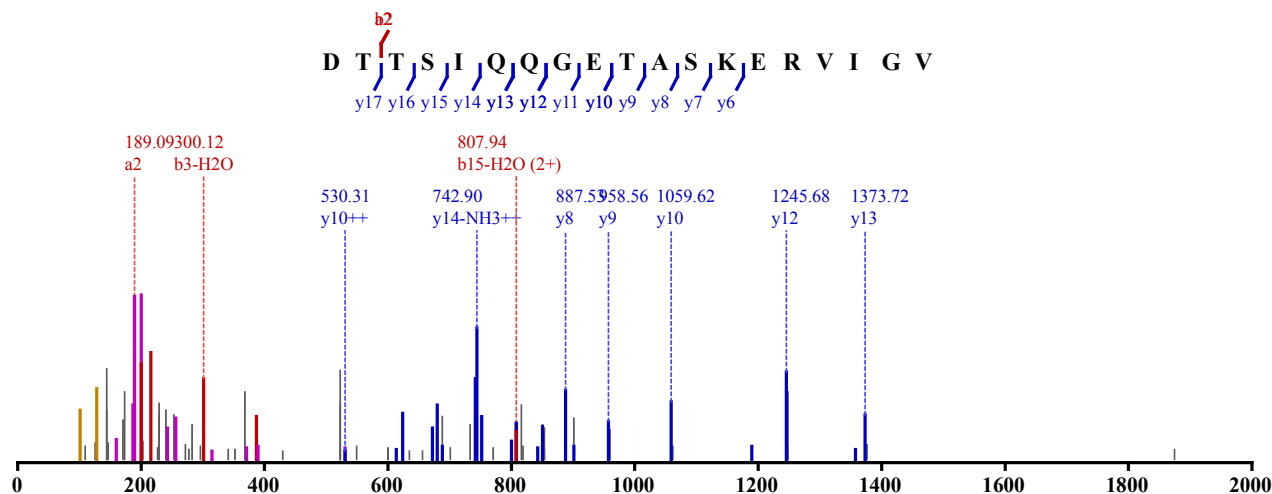

Not Modified  
 Identified in MSS479 with qvalue 0.00  
 Charge: 3, Exp. m/z: 673.683, Calc. m/z: 673.684  
 Data File: HeLa\_AspN\_pH11\_HCD\_1, Scans: 28526 - 28526

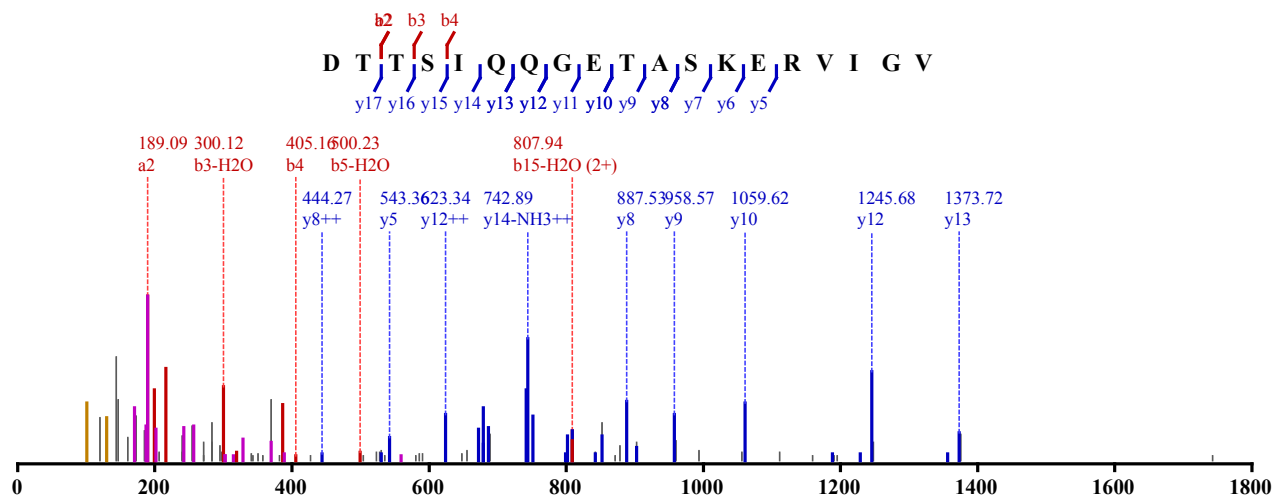

Not Modified  
 Identified in MSS479 with qvalue 0.00  
 Charge: 3, Exp. m/z: 673.683, Calc. m/z: 673.684



Data File: HeLa\_AspN\_pH11\_HCD\_2, Scans: 27545 - 27545

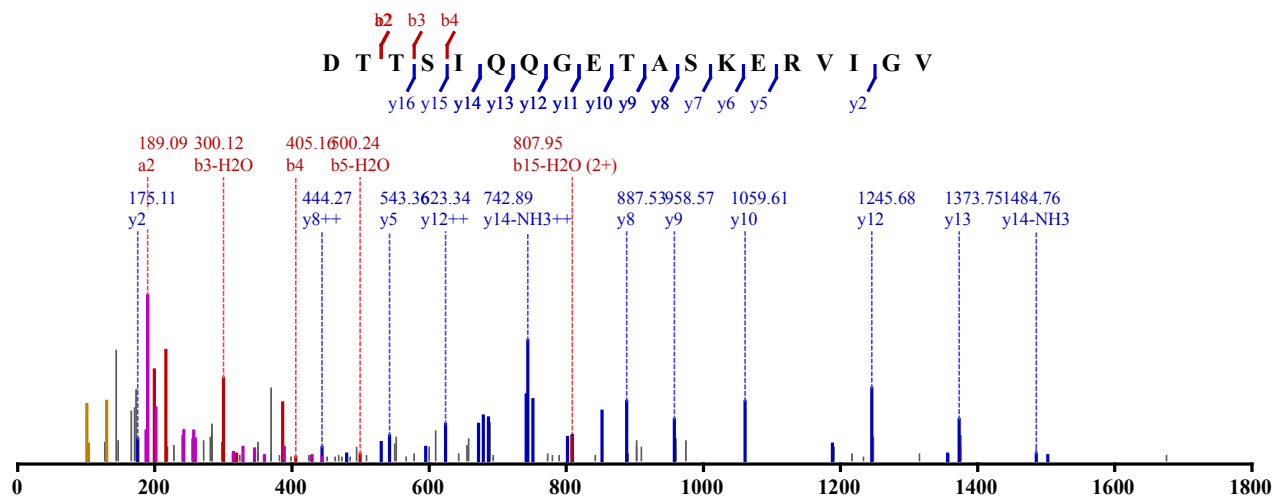

Not Modified

Identified in MSS479 with qvalue 0.00

Charge: 3, Exp. m/z: 673.683, Calc. m/z: 673.684

Data File: HeLa\_AspN\_pH11\_HCD\_3, Scans: 26935 - 26935

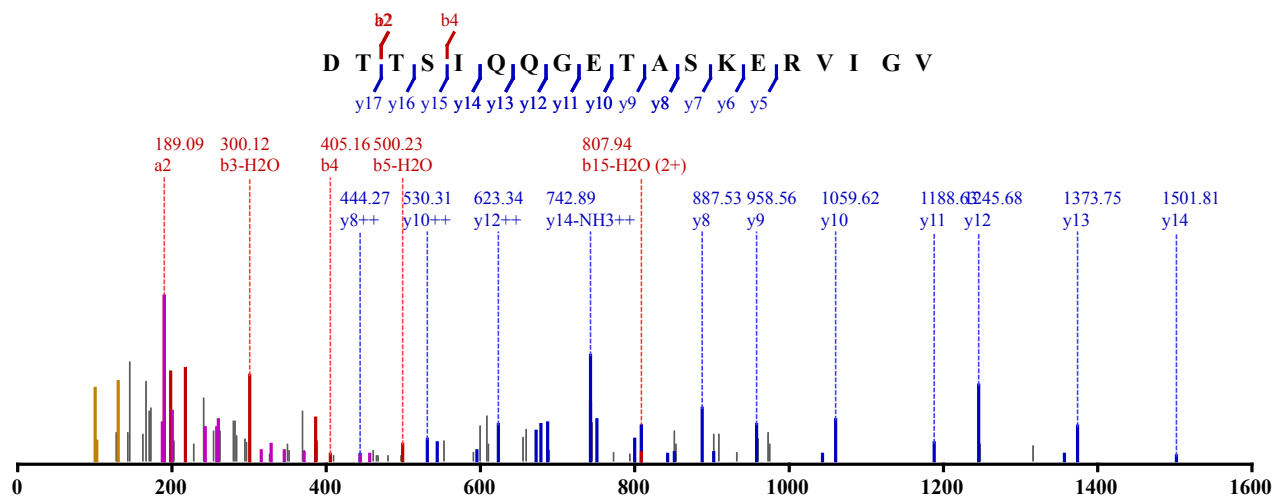

Not Modified

Identified in MSS479 with qvalue 0.00

Charge: 3, Exp. m/z: 673.683, Calc. m/z: 673.684

Data File: HeLa\_AspN\_pH11\_HCD\_3, Scans: 27029 - 27029

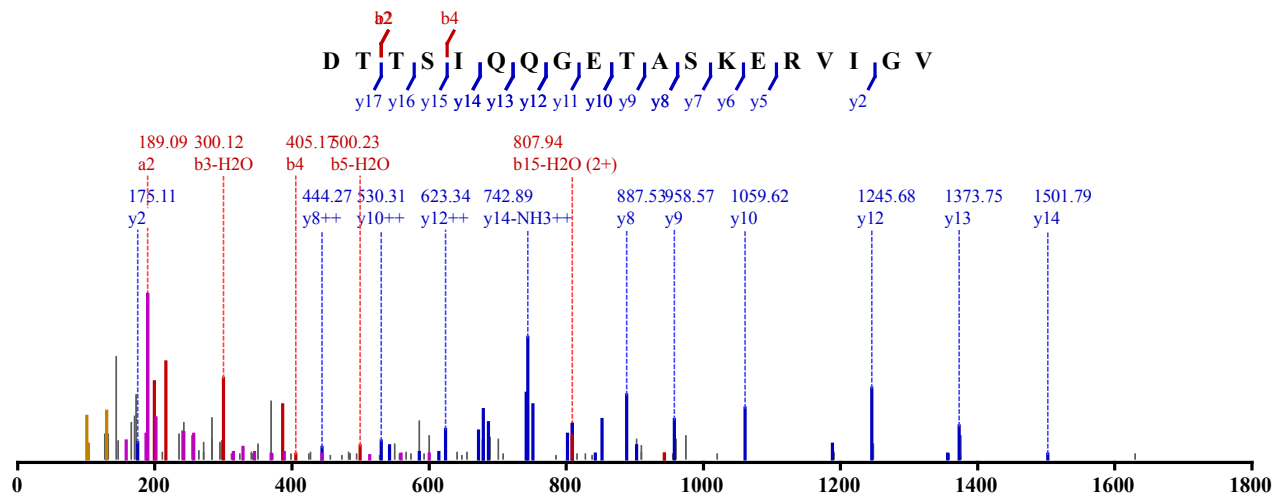

Not Modified

Identified in MSS483 with qvalue 0.00  
 Charge: 3, Exp. m/z: 673.684, Calc. m/z: 673.684  
 Data File: HeLa\_AspN\_pH11\_CID\_3xload\_2, Scans: 22106 - 22106

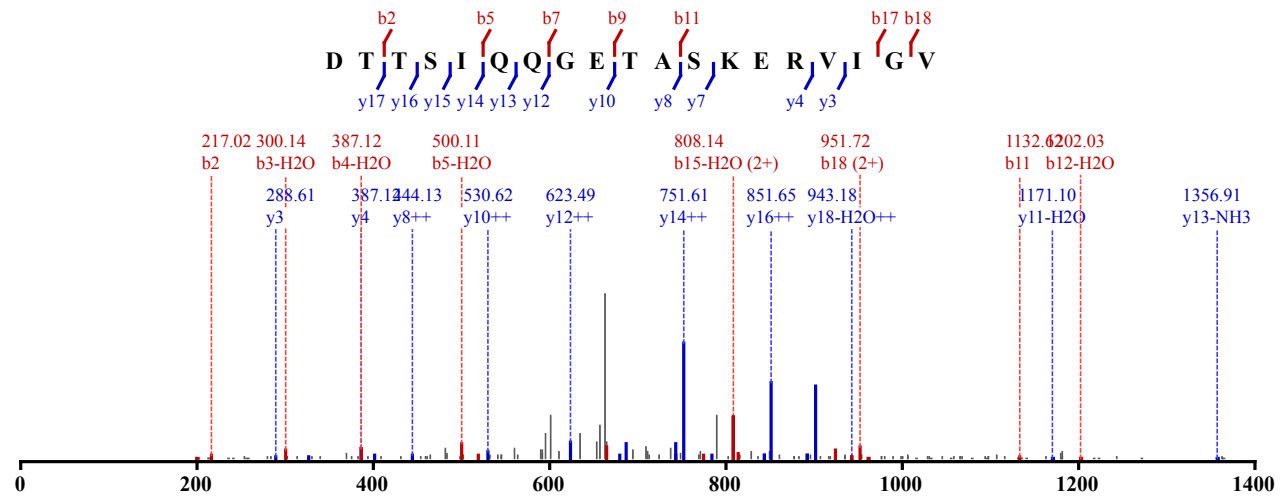

Not Modified  
 Identified in MSS483 with qvalue 0.00  
 Charge: 3, Exp. m/z: 673.684, Calc. m/z: 673.684  
 Data File: HeLa\_AspN\_pH11\_CID\_3xload\_2, Scans: 22182 - 22182

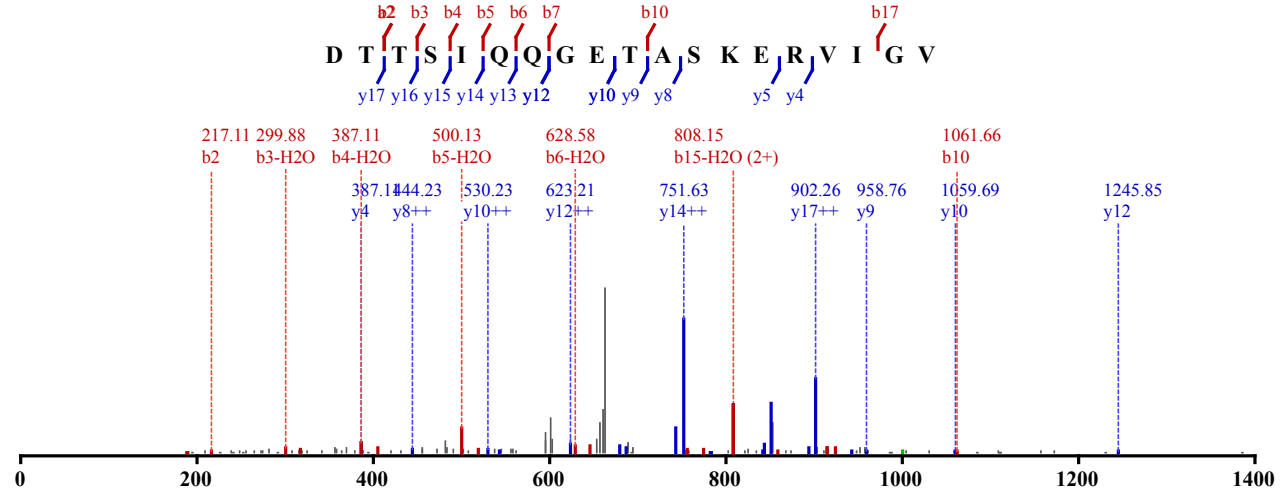

Not Modified  
 Identified in MSS483 with qvalue 0.00  
 Charge: 3, Exp. m/z: 673.683, Calc. m/z: 673.684  
 Data File: HeLa\_AspN\_pH11\_CID\_3xload, Scans: 21739 - 21739

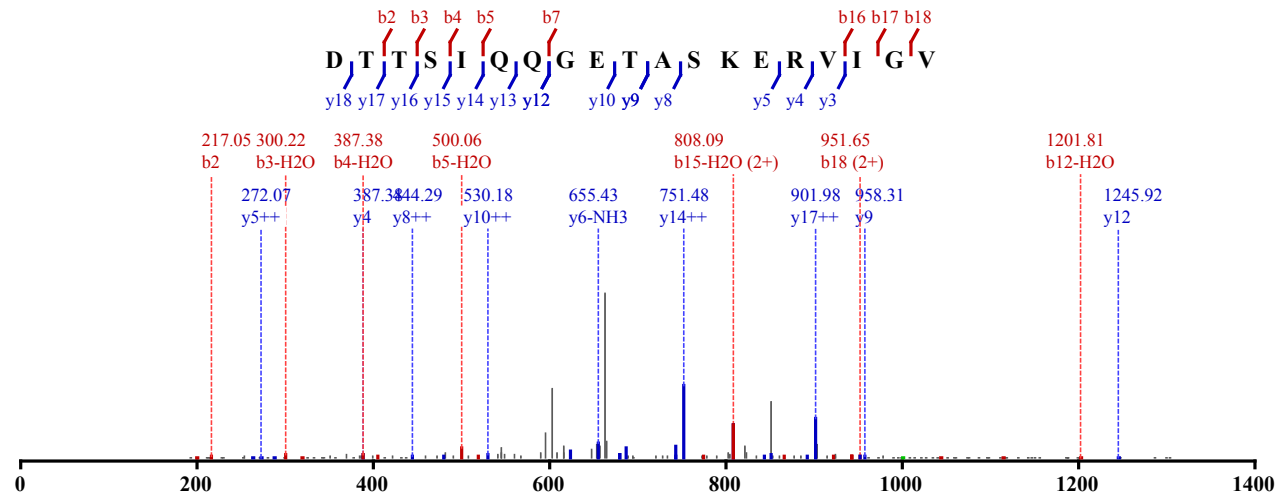

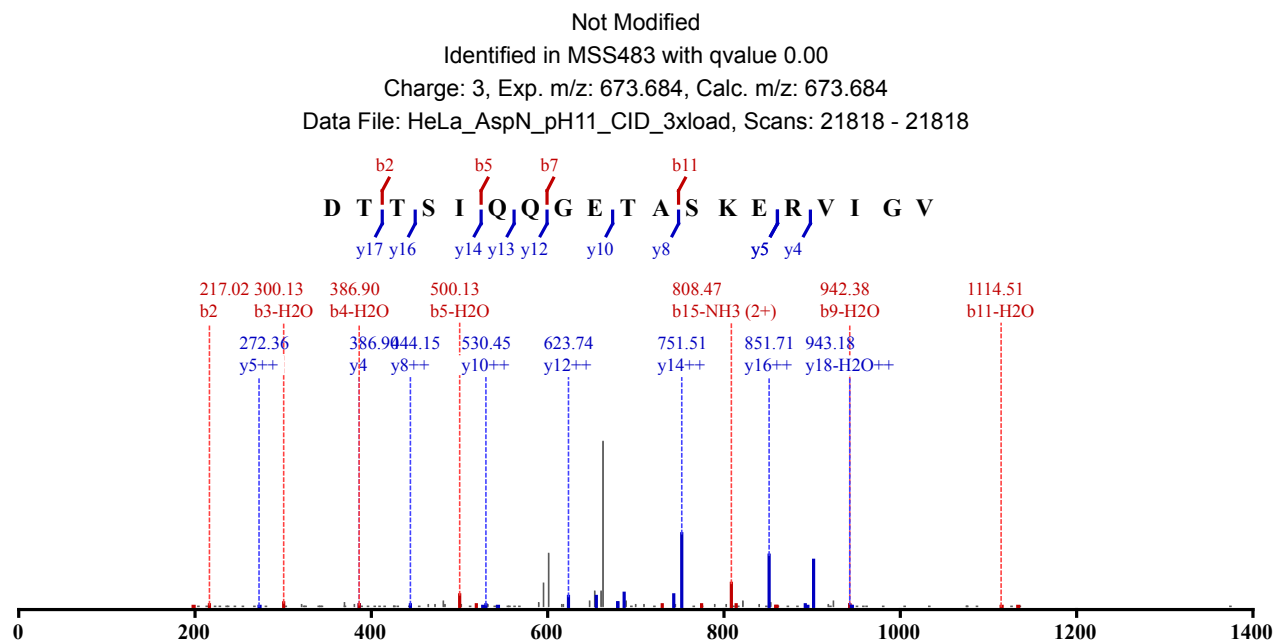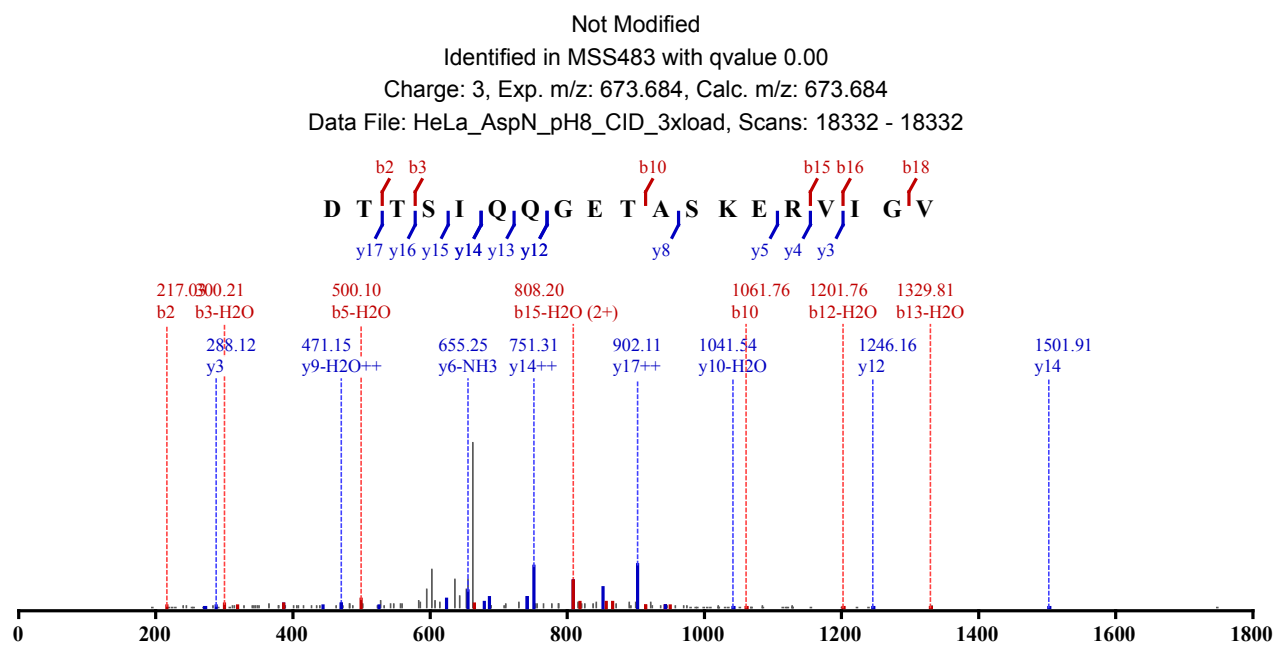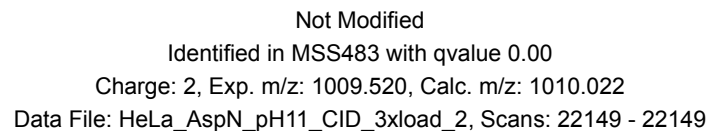

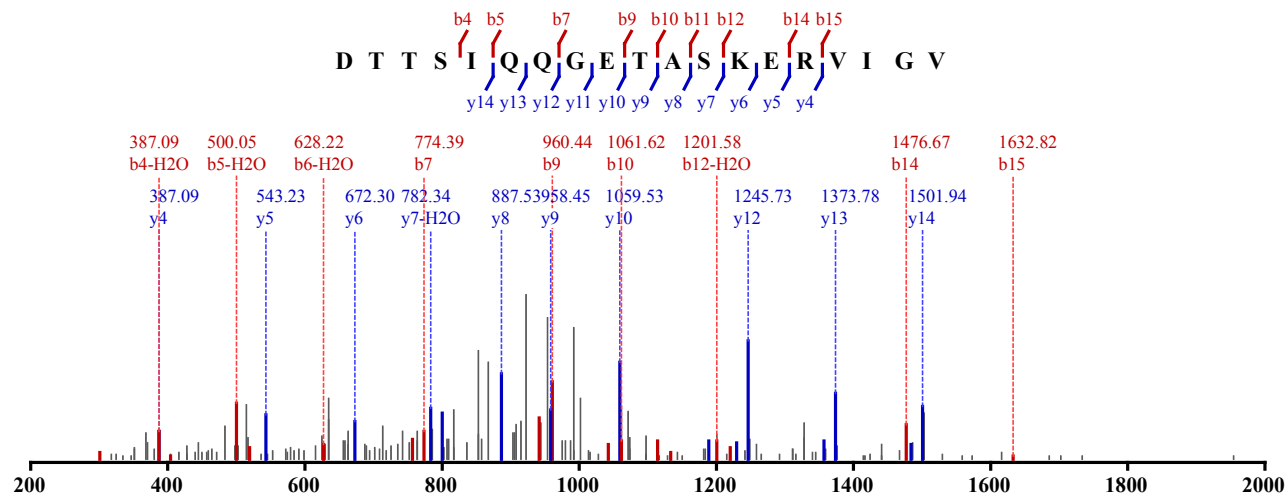

Not Modified

Identified in MSS483 with qvalue 0.00

Charge: 2, Exp. m/z: 1010.020, Calc. m/z: 1010.022

Data File: HeLa\_AspN\_pH11\_CID\_3xload, Scans: 21794 - 21794

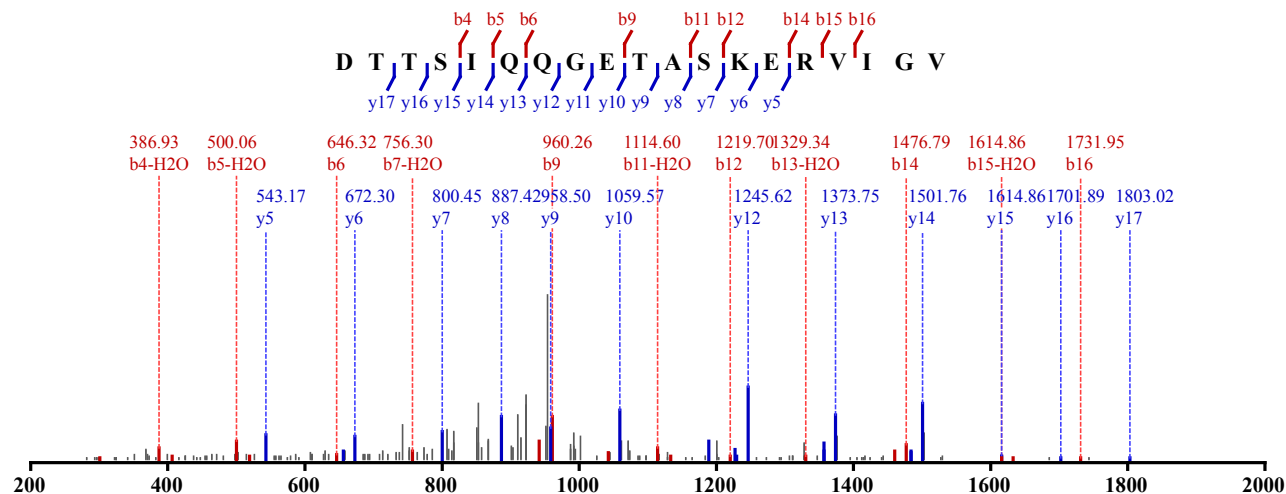

Not Modified

Identified in MSS483 with qvalue 0.00

Charge: 3, Exp. m/z: 674.019, Calc. m/z: 673.684

Data File: HeLa\_AspN\_pH8\_CID\_3xload, Scans: 18317 - 18317

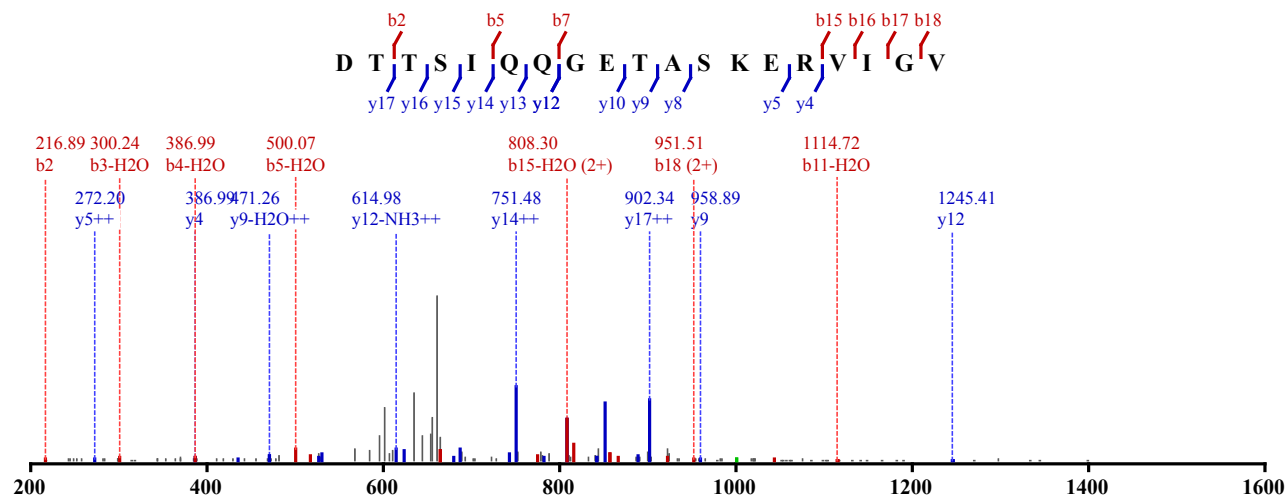

1 x Oxidation (M)

Identified in MSS480 with qvalue 0.00

Charge: 2, Exp. m/z: 556.798, Calc. m/z: 556.797

Data File: HeLa\_try\_80pcACN\_CID\_3xload\_2, Scans: 7180 - 7180

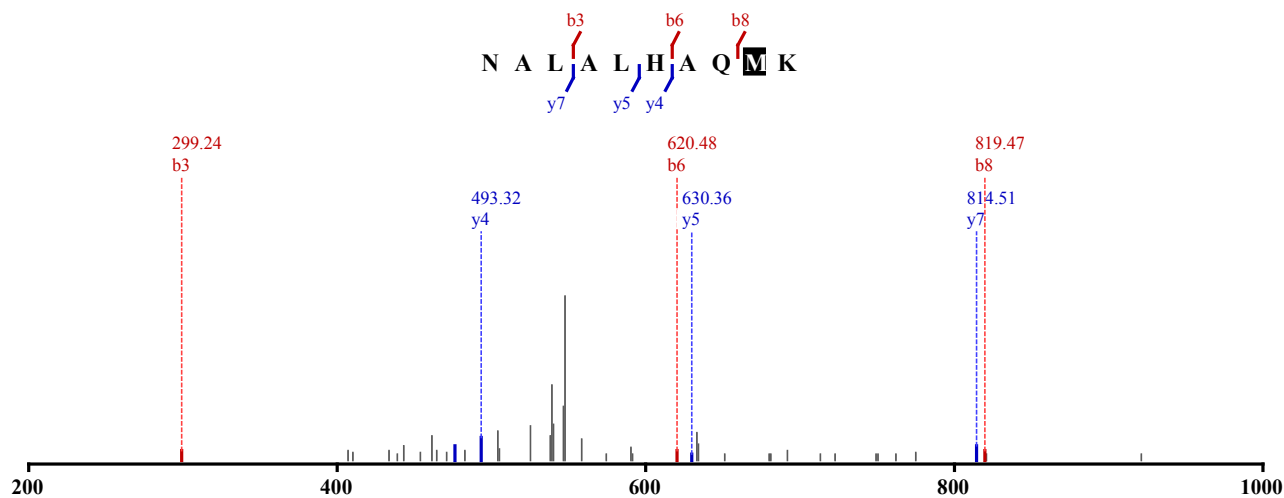

1 x Oxidation (M)

Identified in MSS480 with qvalue 0.00

Charge: 2, Exp. m/z: 556.798, Calc. m/z: 556.797

Data File: HeLa\_try\_80pcACN\_CID\_3xload\_3, Scans: 8480 - 8480

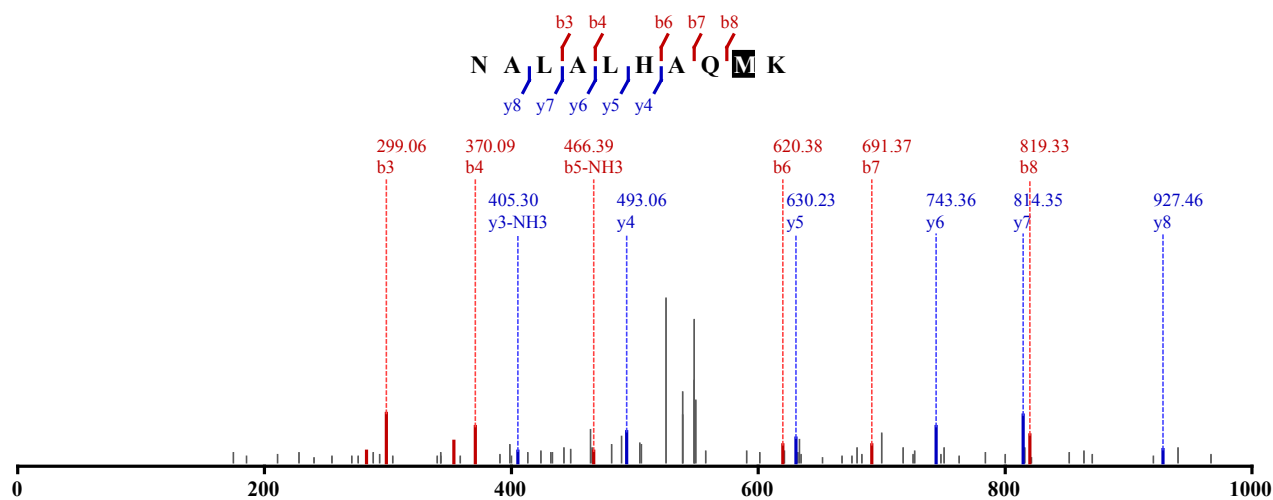

1 x Oxidation (M)

Identified in MSS480 with qvalue 0.00

Charge: 2, Exp. m/z: 556.798, Calc. m/z: 556.797

Data File: HeLa\_try\_80pcACN\_CID\_3xload, Scans: 6749 - 6749

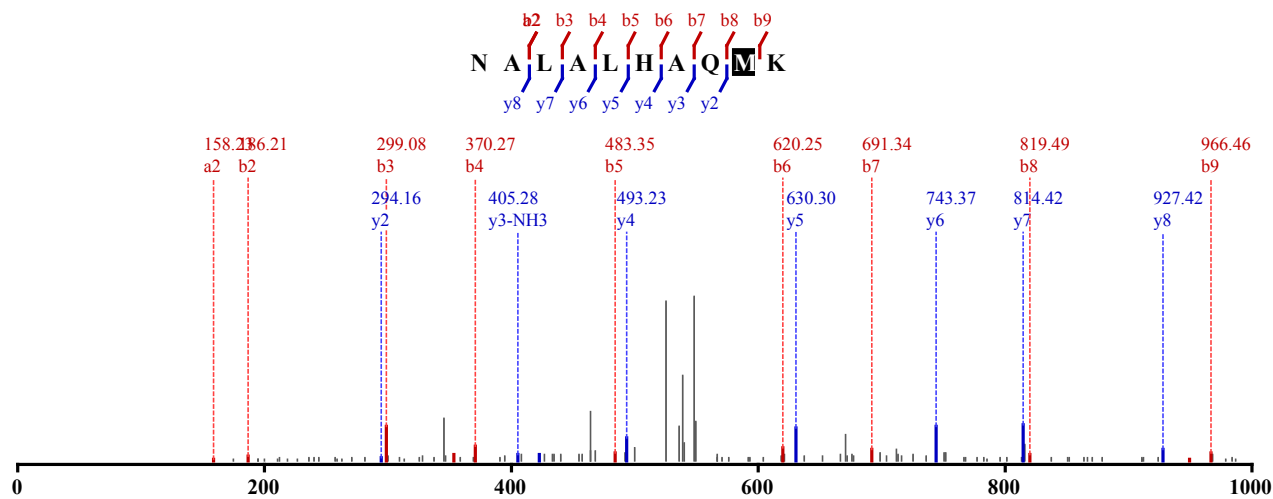

1 x Oxidation (M)

Identified in MSS484 with qvalue 0.01  
 Charge: 2, Exp. m/z: 556.799, Calc. m/z: 556.797  
 Data File: HeLa\_Try\_80pcACN\_HCD\_1, Scans: 11483 - 11483

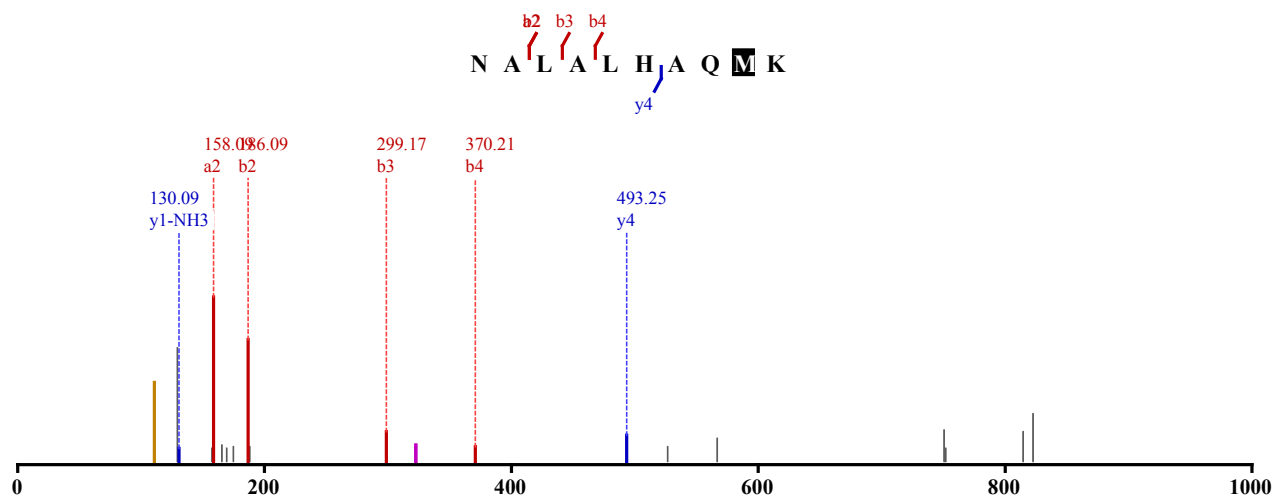

Not Modified  
 Identified in MSS481 with qvalue 0.01  
 Charge: 2, Exp. m/z: 532.233, Calc. m/z: 532.232  
 Data File: HeLa\_LysC\_pH6\_CID\_3xload\_3, Scans: 8007 - 8007

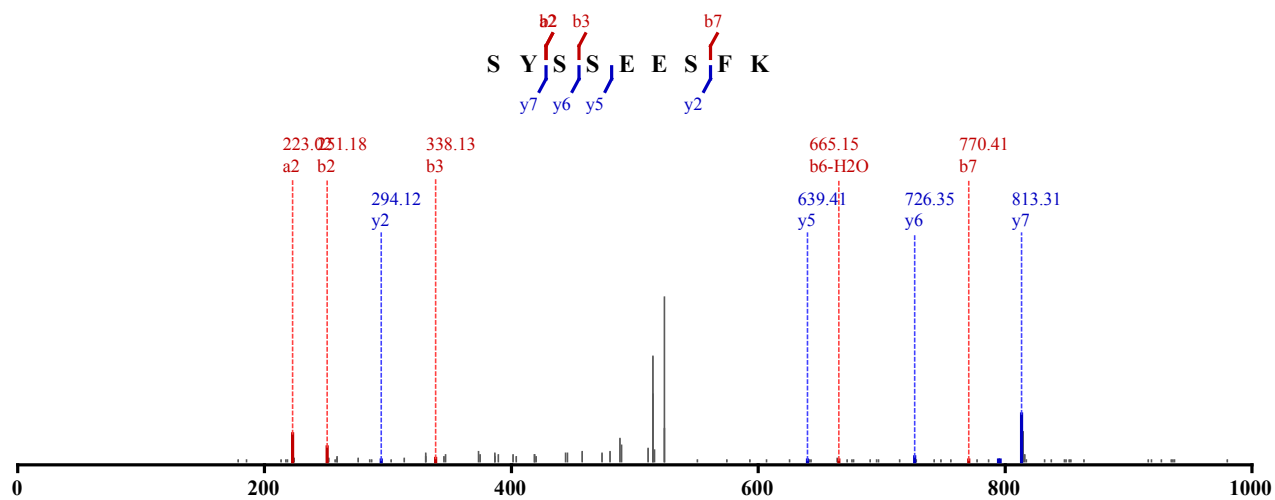

Not Modified  
 Identified in MSS484 with qvalue 0.00  
 Charge: 2, Exp. m/z: 532.233, Calc. m/z: 532.232  
 Data File: HeLa\_Try\_pH6\_HCD\_2, Scans: 16175 - 16175

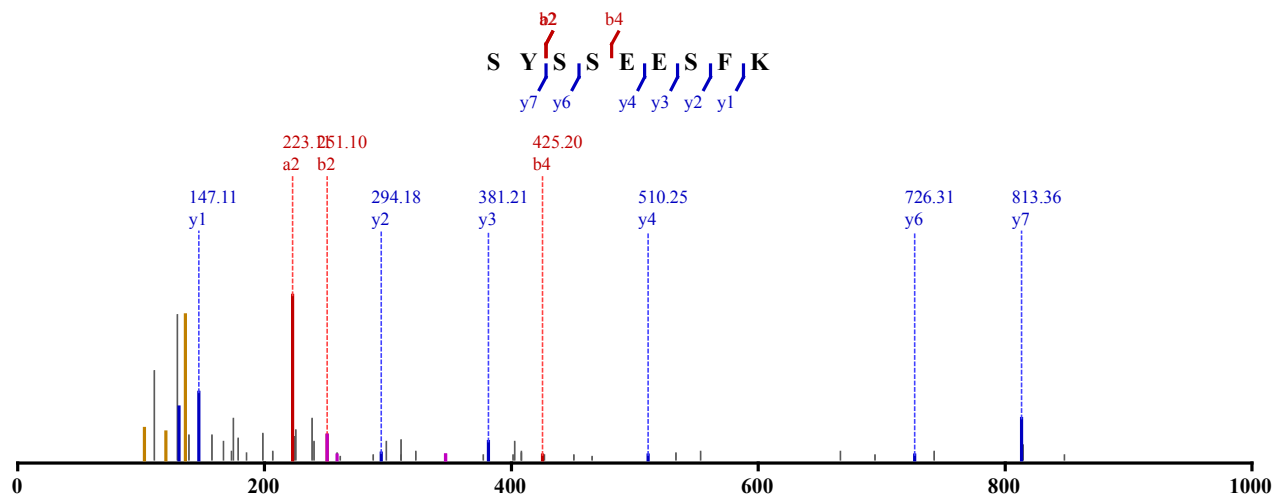

Not Modified

Identified in MSS484 with qvalue 0.00

Charge: 2, Exp. m/z: 532.232, Calc. m/z: 532.232

Data File: HeLa\_Try\_pH6\_HCD\_3, Scans: 16510 - 16510

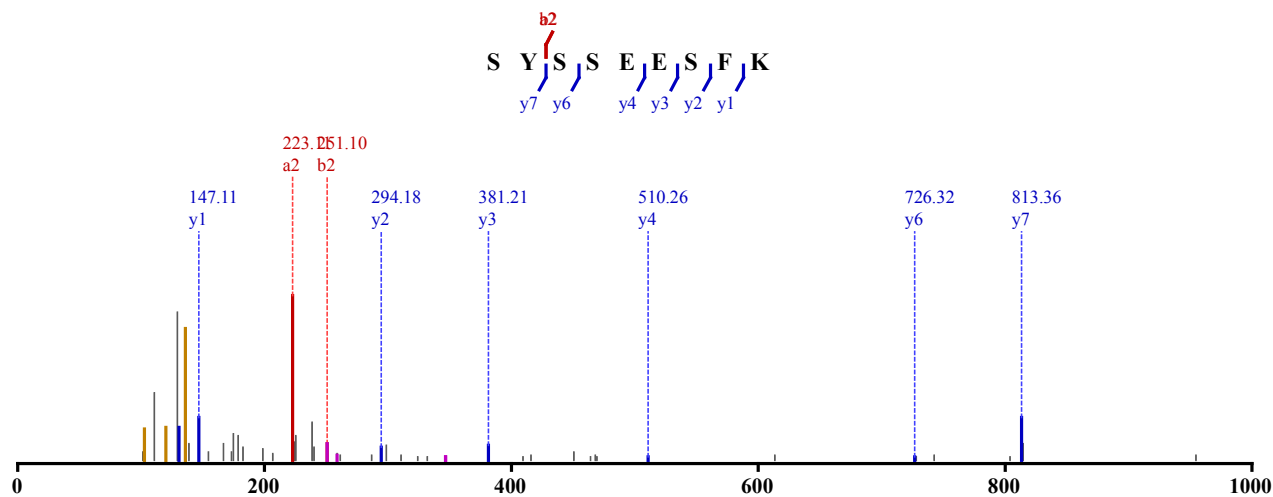

Not Modified

Identified in MSS485 with qvalue 0.00

Charge: 2, Exp. m/z: 532.232, Calc. m/z: 532.232

Data File: HeLa\_LysC\_pH6\_HCD\_3, Scans: 16091 - 16091

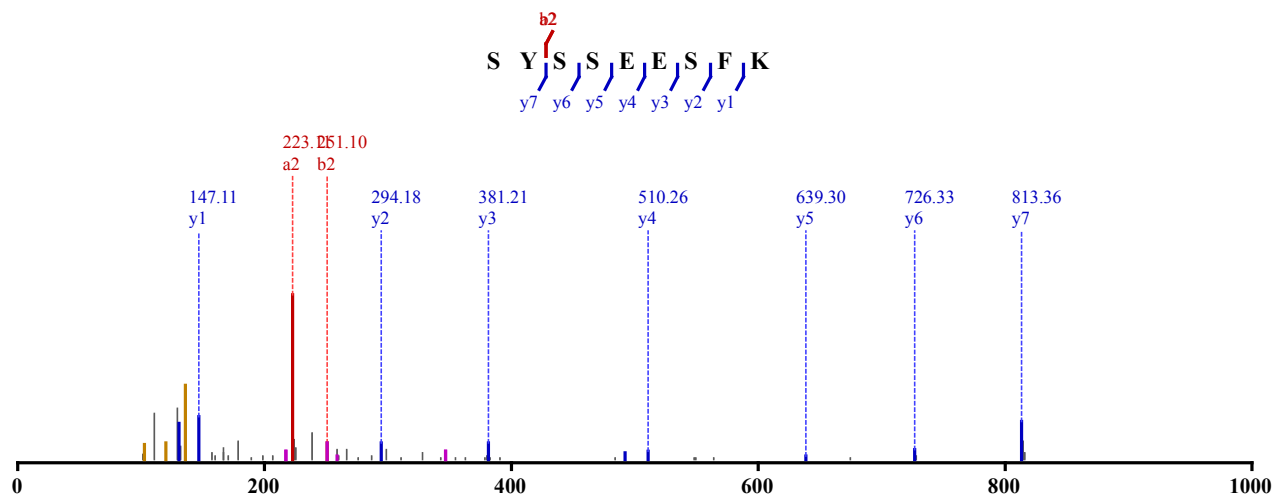

Not Modified

Identified in MSS485 with qvalue 0.00

Charge: 2, Exp. m/z: 532.234, Calc. m/z: 532.232

Data File: HeLa\_LysC\_pH8\_HCD\_3, Scans: 16647 - 16647

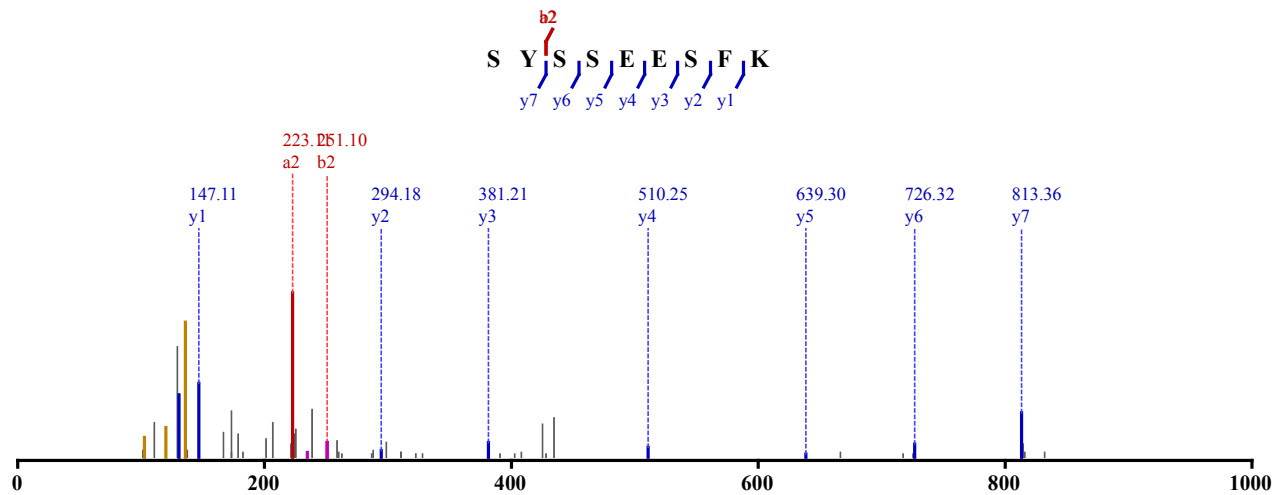

Not Modified  
 Identified in MSS483 with qvalue 0.00  
 Charge: 2, Exp. m/z: 926.972, Calc. m/z: 926.972  
 Data File: HeLa\_AspN\_pH8\_CID\_3xload\_2, Scans: 30897 - 30897

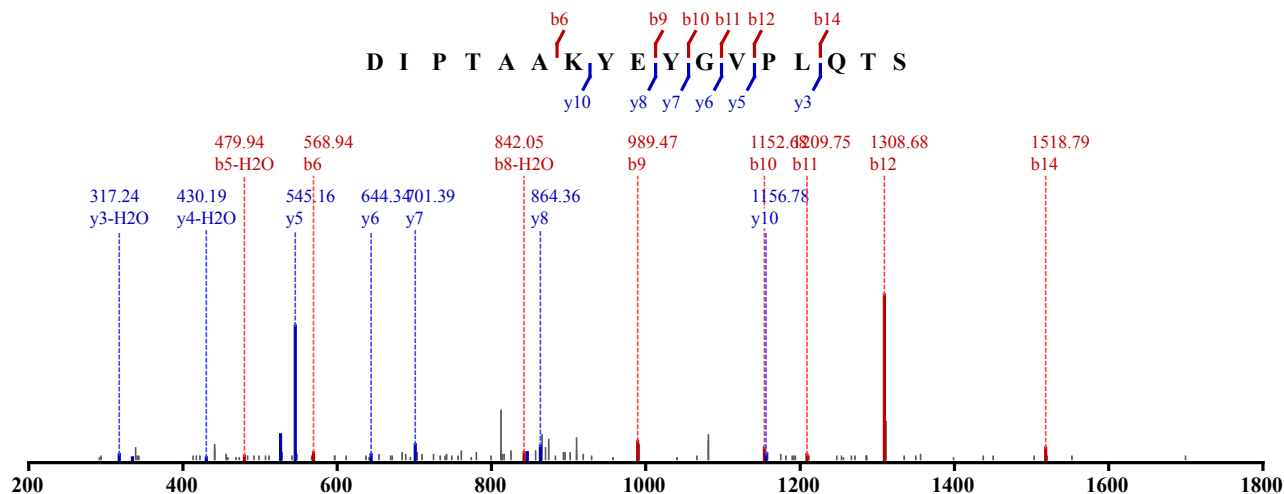

Not Modified  
 Identified in MSS479 with qvalue 0.00  
 Charge: 2, Exp. m/z: 551.799, Calc. m/z: 551.797  
 Data File: HeLa\_AspN\_pH11\_HCD\_1, Scans: 37605 - 37605

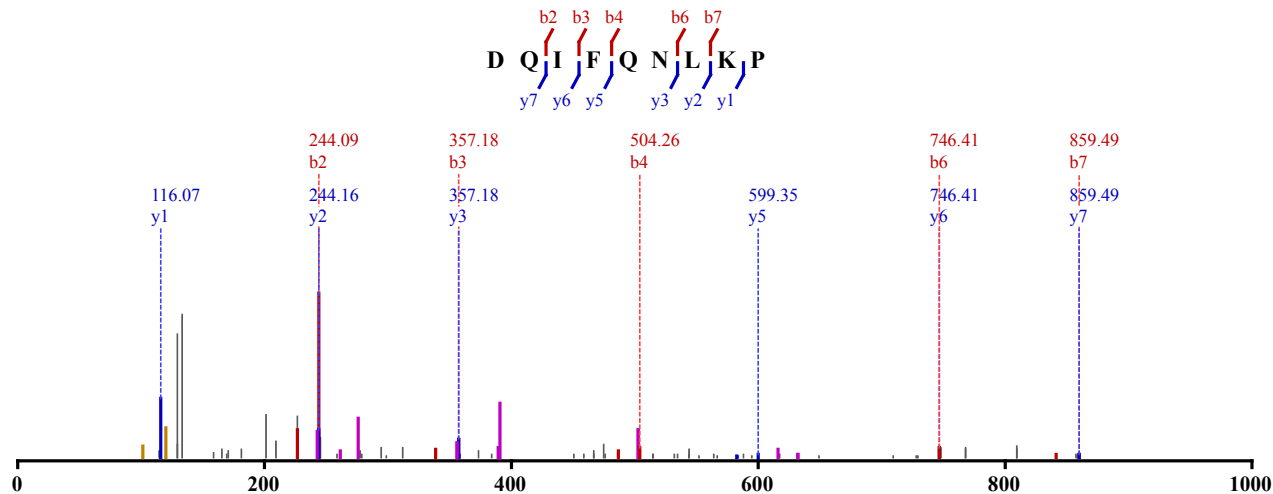

Not Modified  
 Identified in MSS479 with qvalue 0.00  
 Charge: 2, Exp. m/z: 551.798, Calc. m/z: 551.797



Data File: HeLa\_AspN\_pH11\_HCD\_2, Scans: 36418 - 36418

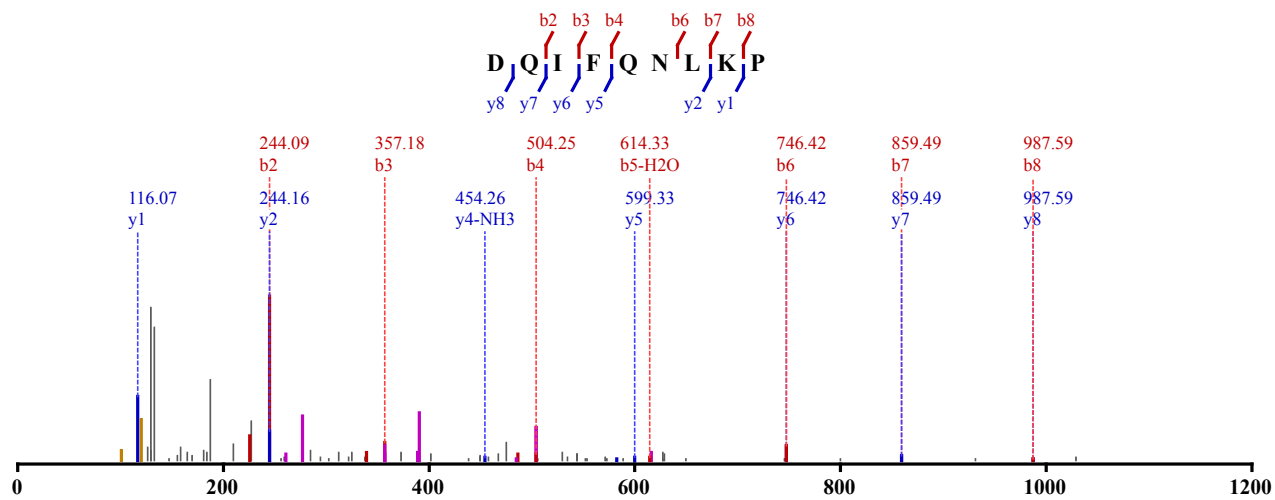

Not Modified

Identified in MSS479 with qvalue 0.01

Charge: 2, Exp. m/z: 551.798, Calc. m/z: 551.797

Data File: HeLa\_AspN\_pH11\_HCD\_3, Scans: 35601 - 35601

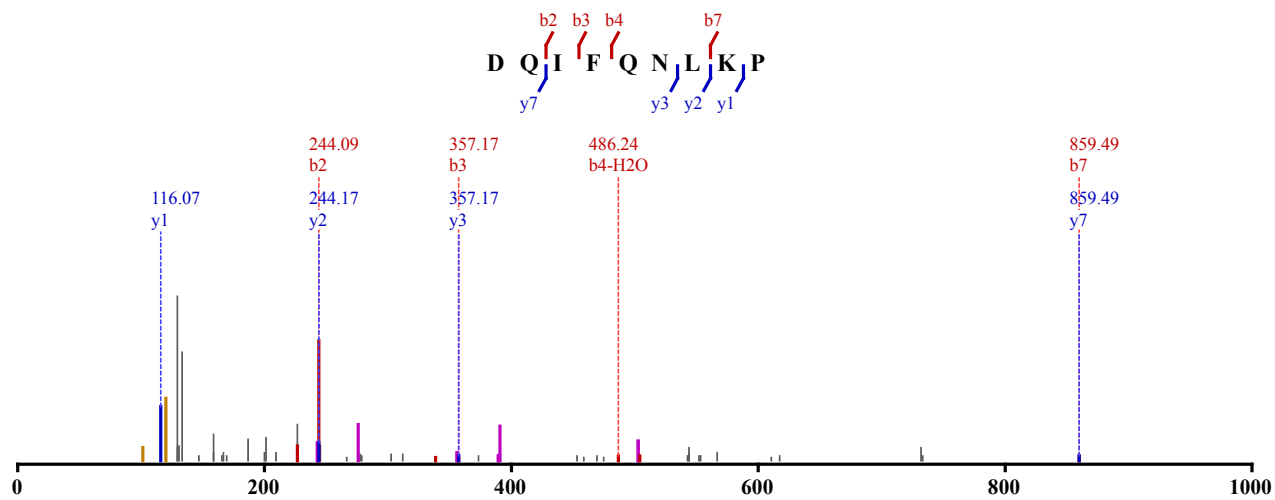

Not Modified

Identified in MSS479 with qvalue 0.00

Charge: 2, Exp. m/z: 551.799, Calc. m/z: 551.797

Data File: HeLa\_AspN\_pH8\_HCD\_1, Scans: 34692 - 34692

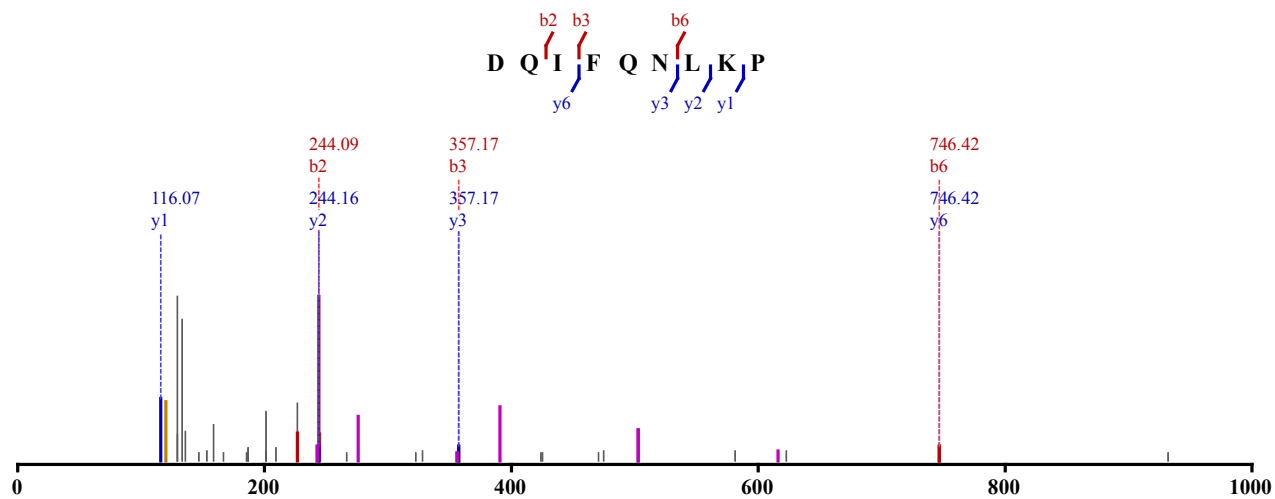

Not Modified

Identified in MSS479 with qvalue 0.00  
 Charge: 2, Exp. m/z: 551.798, Calc. m/z: 551.797  
 Data File: HeLa\_AspN\_pH8\_HCD\_1, Scans: 34776 - 34776

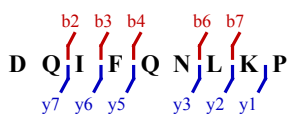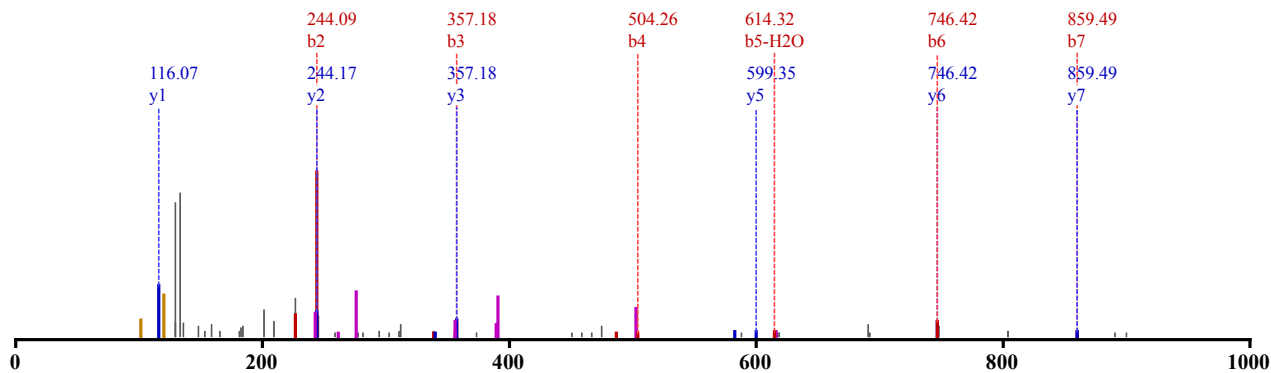

Not Modified  
 Identified in MSS479 with qvalue 0.00  
 Charge: 2, Exp. m/z: 551.799, Calc. m/z: 551.797  
 Data File: HeLa\_AspN\_pH8\_HCD\_2, Scans: 33708 - 33708

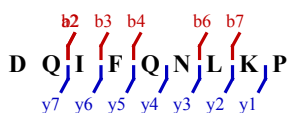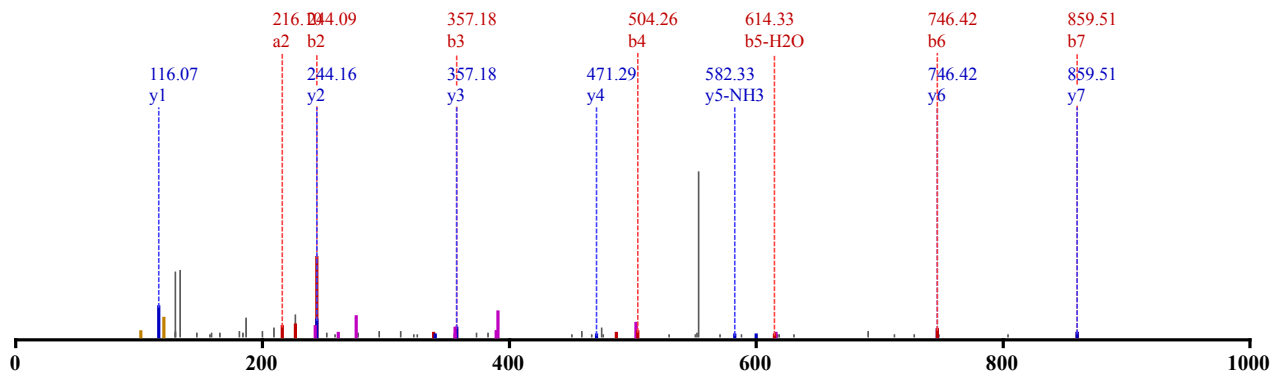

Not Modified  
 Identified in MSS483 with qvalue 0.00  
 Charge: 2, Exp. m/z: 551.798, Calc. m/z: 551.797  
 Data File: HeLa\_AspN\_pH11\_CID\_3xload\_2, Scans: 29720 - 29720

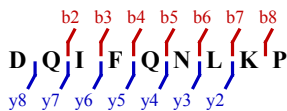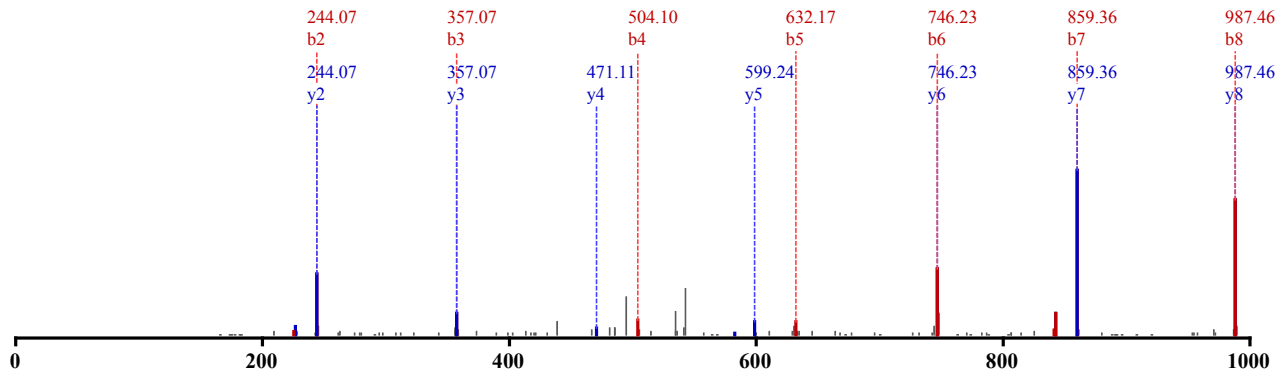

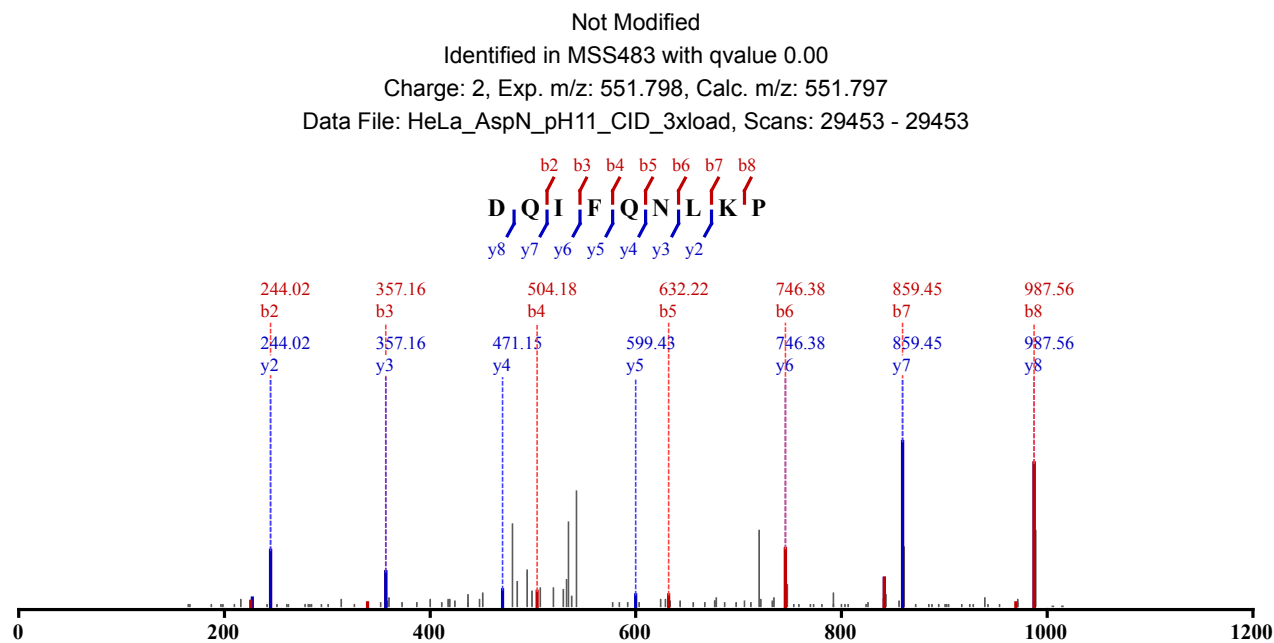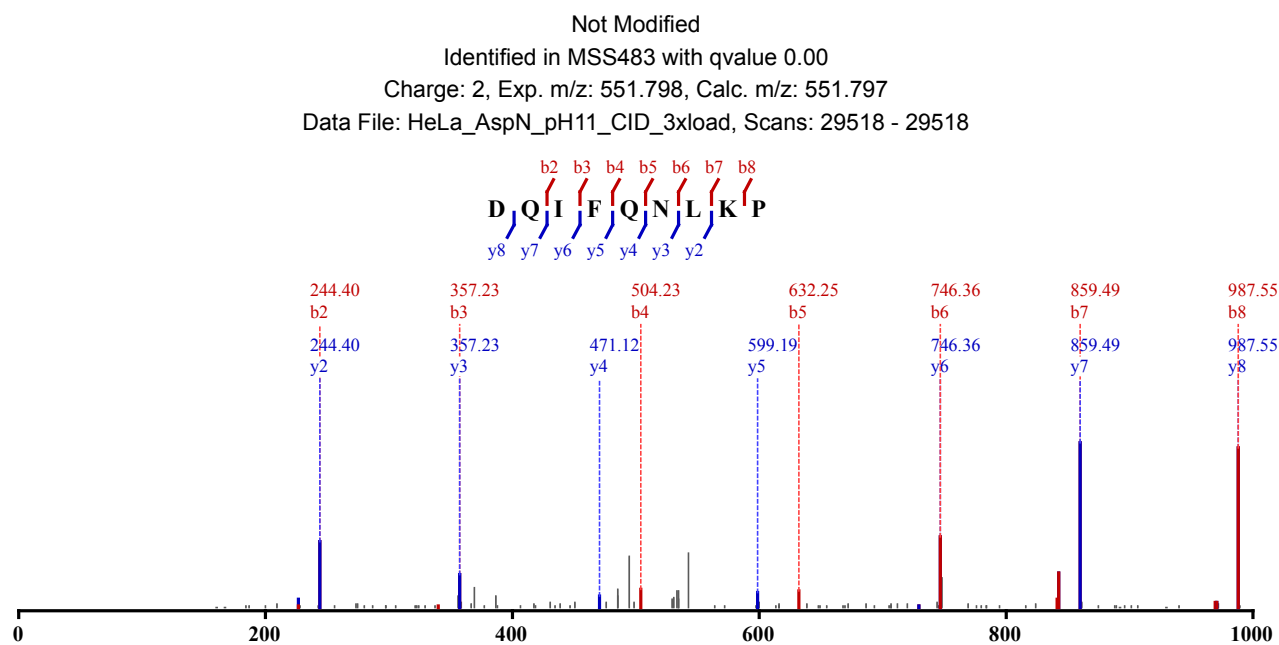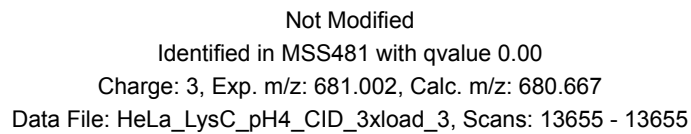

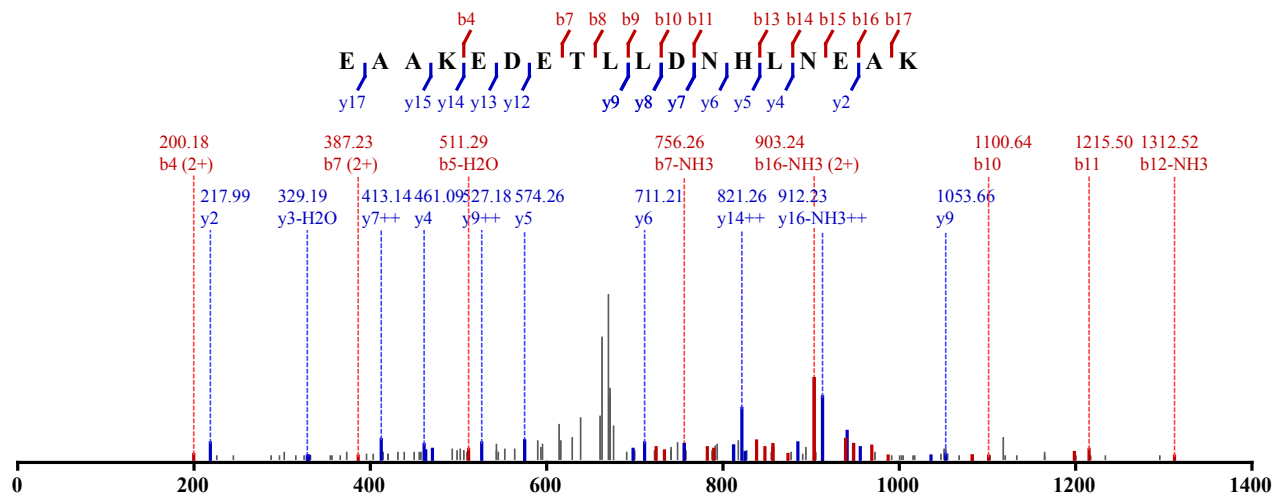

Not Modified  
 Identified in MSS80 with qvalue 0.01  
 Charge: 2, Exp. m/z: 455.717, Calc. m/z: 455.717  
 Data File: HeLa\_AspN\_CID\_ovnt\_2, Scans: 3683 - 3683

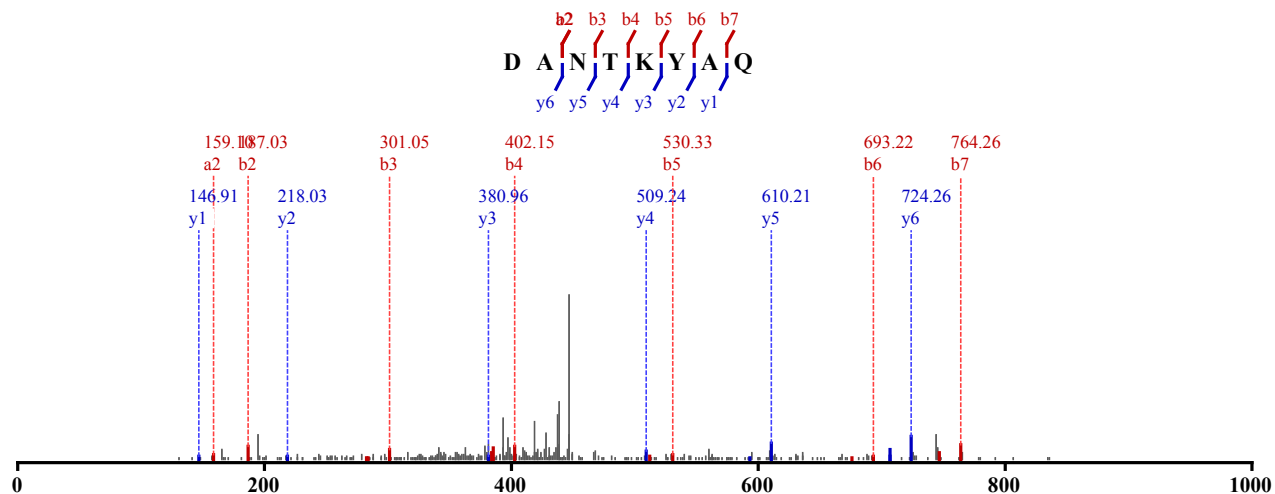

Not Modified  
 Identified in MSS479 with qvalue 0.00  
 Charge: 2, Exp. m/z: 455.718, Calc. m/z: 455.717  
 Data File: HeLa\_AspN\_pH11\_HCD\_3, Scans: 5746 - 5746

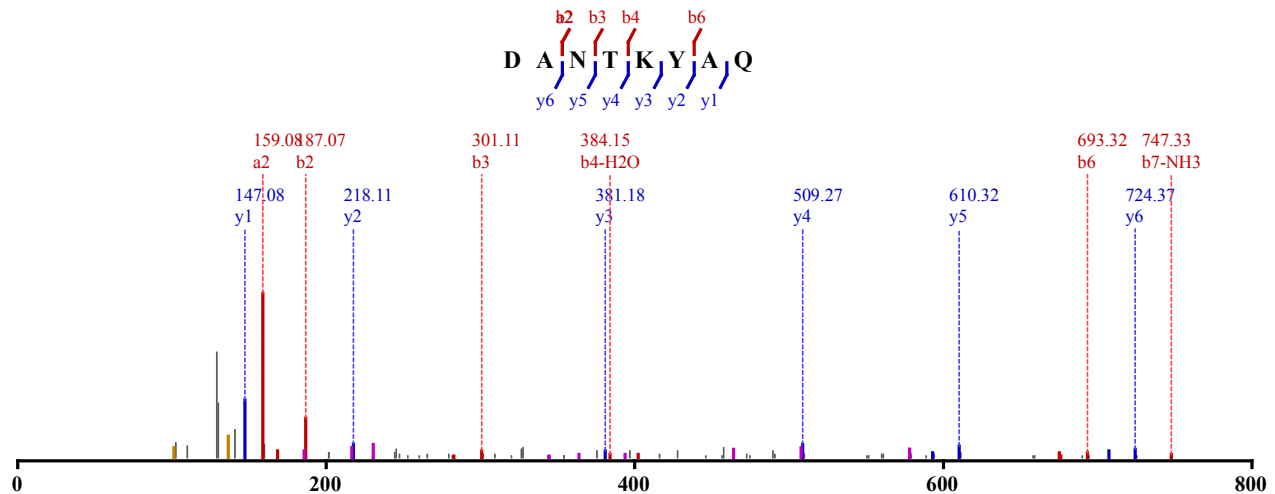

Not Modified  
 Identified in MSS479 with qvalue 0.00  
 Charge: 2, Exp. m/z: 455.717, Calc. m/z: 455.717

Data File: HeLa\_AspN\_pH11\_HCD\_1, Scans: 7040 - 7040

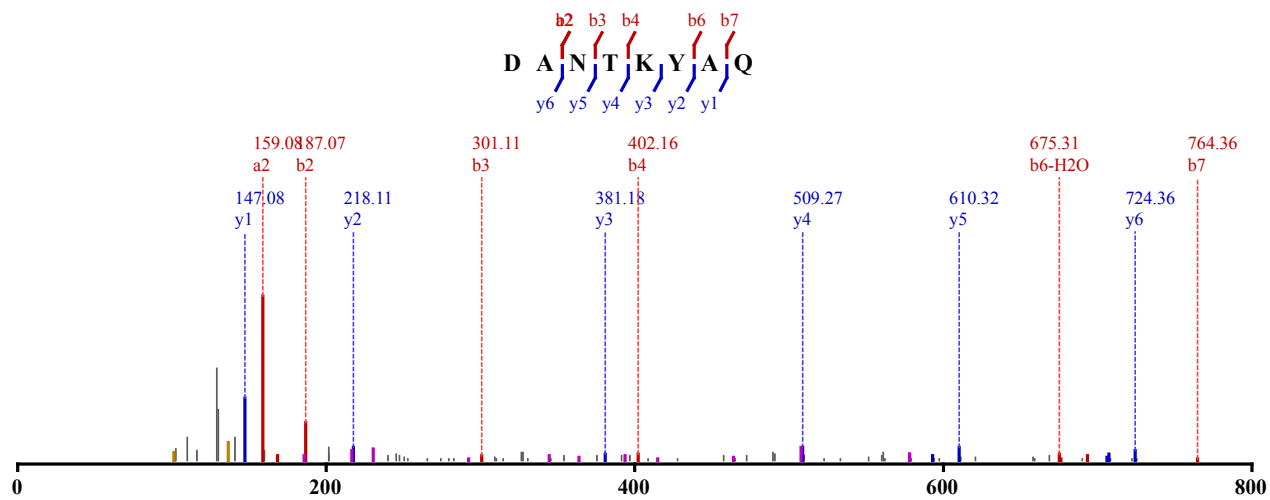

Not Modified

Identified in MSS483 with qvalue 0.00

Charge: 2, Exp. m/z: 455.717, Calc. m/z: 455.717

Data File: HeLa\_AspN\_pH11\_CID\_3xload\_2, Scans: 4894 - 4894

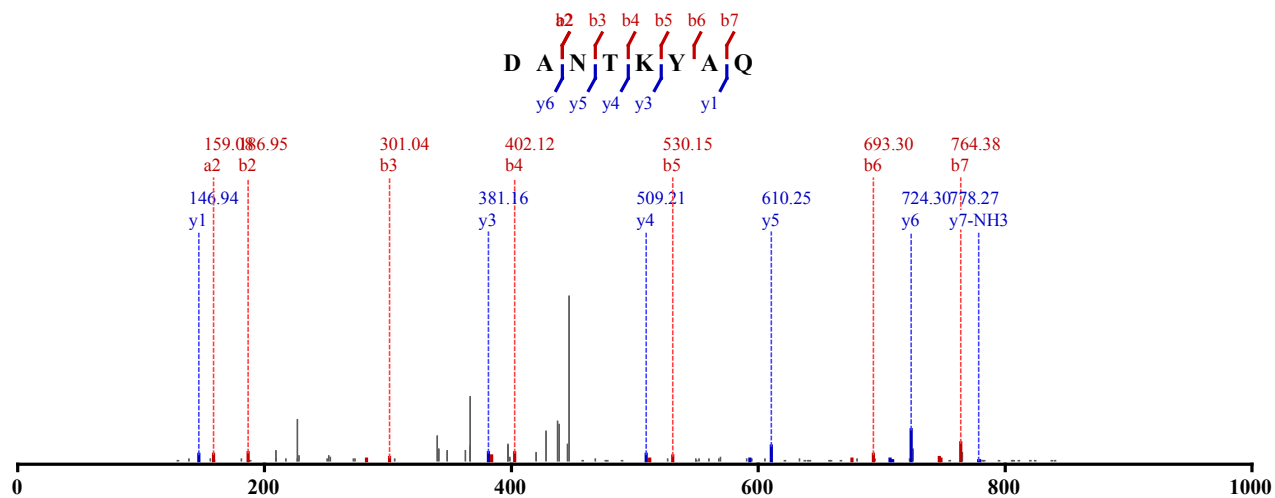

Not Modified

Identified in MSS483 with qvalue 0.01

Charge: 2, Exp. m/z: 455.224, Calc. m/z: 455.717

Data File: HeLa\_AspN\_pH11\_CID\_3xload\_2, Scans: 4881 - 4881

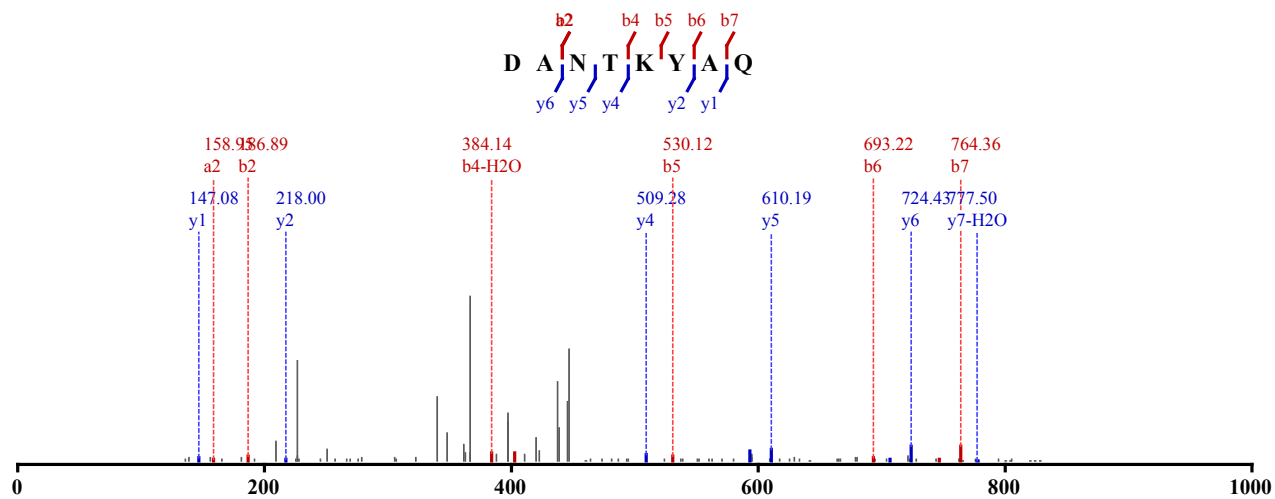

Not Modified

Identified in MSS487 with qvalue 0.00  
 Charge: 2, Exp. m/z: 705.871, Calc. m/z: 705.872  
 Data File: HeLa\_ArgC-Try\_pH3\_HCD\_3, Scans: 36857 - 36857

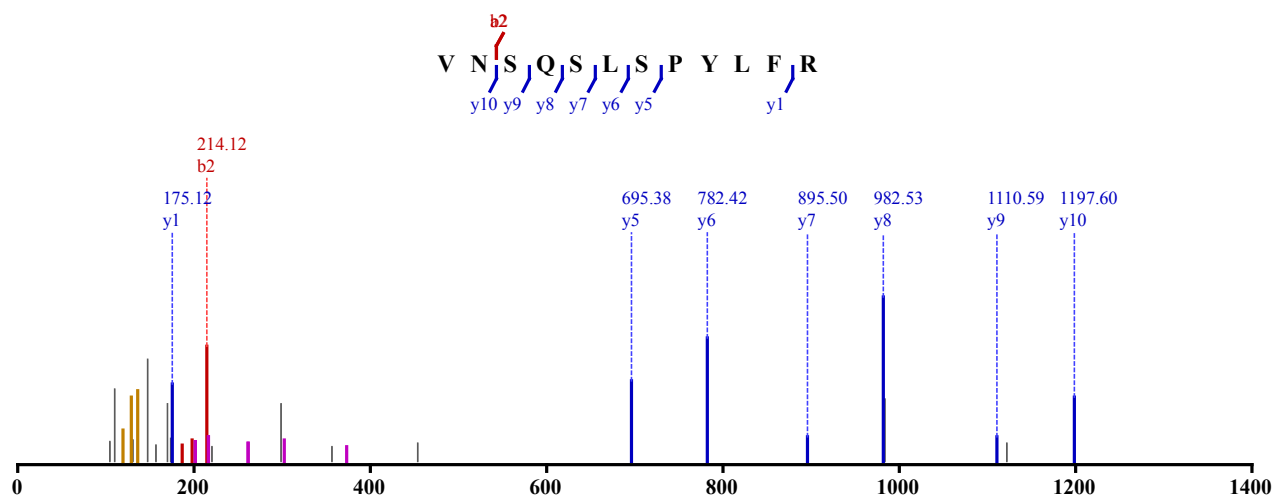

Not Modified  
 Identified in MSS487 with qvalue 0.00  
 Charge: 2, Exp. m/z: 705.873, Calc. m/z: 705.872  
 Data File: HeLa\_ArgC-Try\_pH4\_HCD\_2, Scans: 35162 - 35162

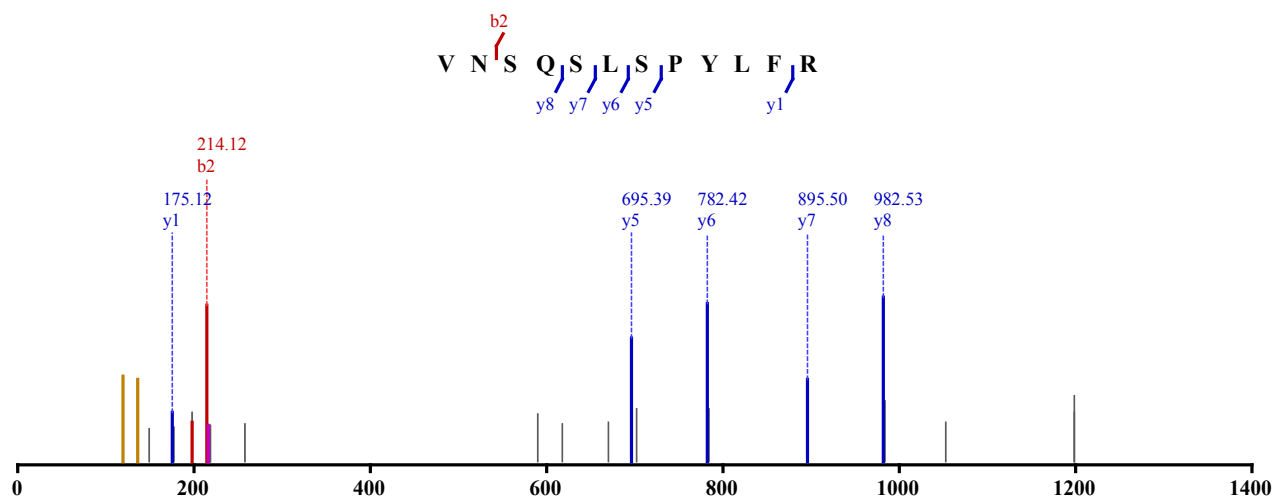

Not Modified  
 Identified in MSS487 with qvalue 0.00  
 Charge: 2, Exp. m/z: 705.873, Calc. m/z: 705.872  
 Data File: HeLa\_ArgC-Try\_pH5\_HCD\_1, Scans: 34242 - 34242

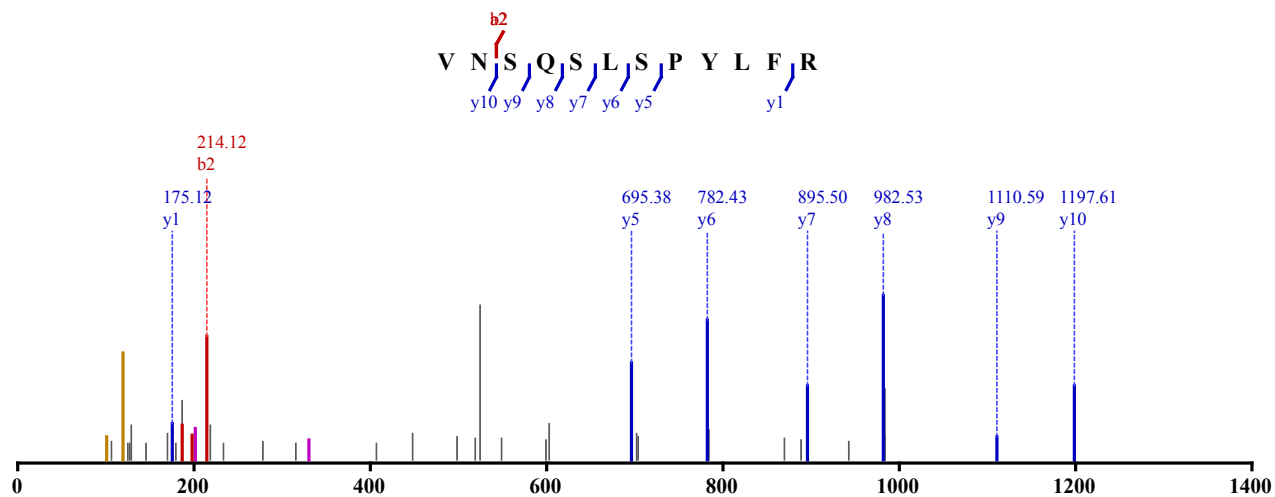

Not Modified

Identified in MSS487 with qvalue 0.00

Charge: 2, Exp. m/z: 705.873, Calc. m/z: 705.872

Data File: HeLa\_ArgC-Try\_pH5\_HCD\_2, Scans: 37012 - 37012

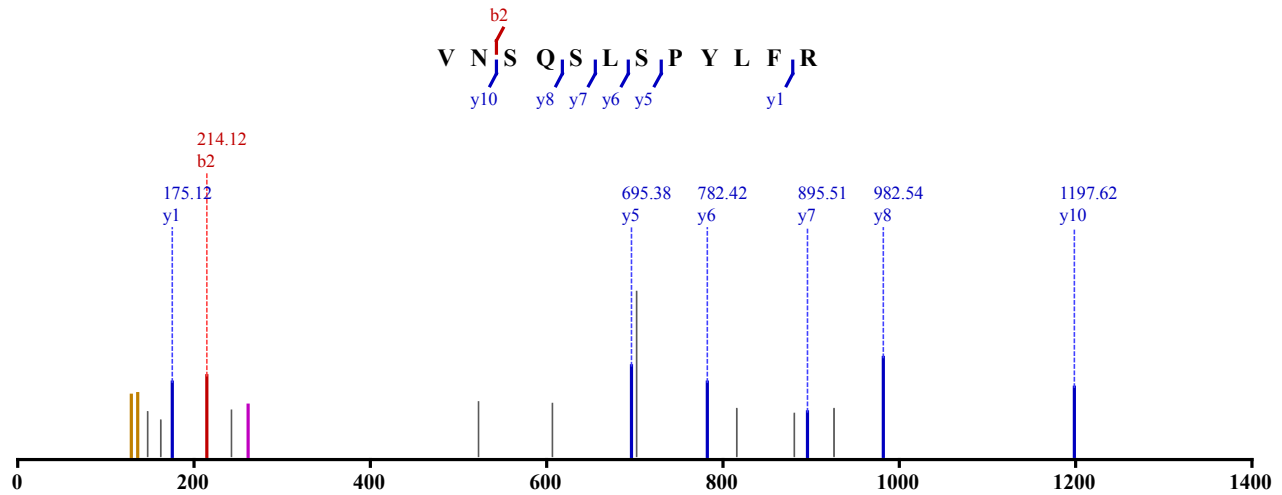

Not Modified

Identified in MSS487 with qvalue 0.00

Charge: 2, Exp. m/z: 705.872, Calc. m/z: 705.872

Data File: HeLa\_ArgC-Try\_pH3\_HCD\_1, Scans: 32742 - 32742

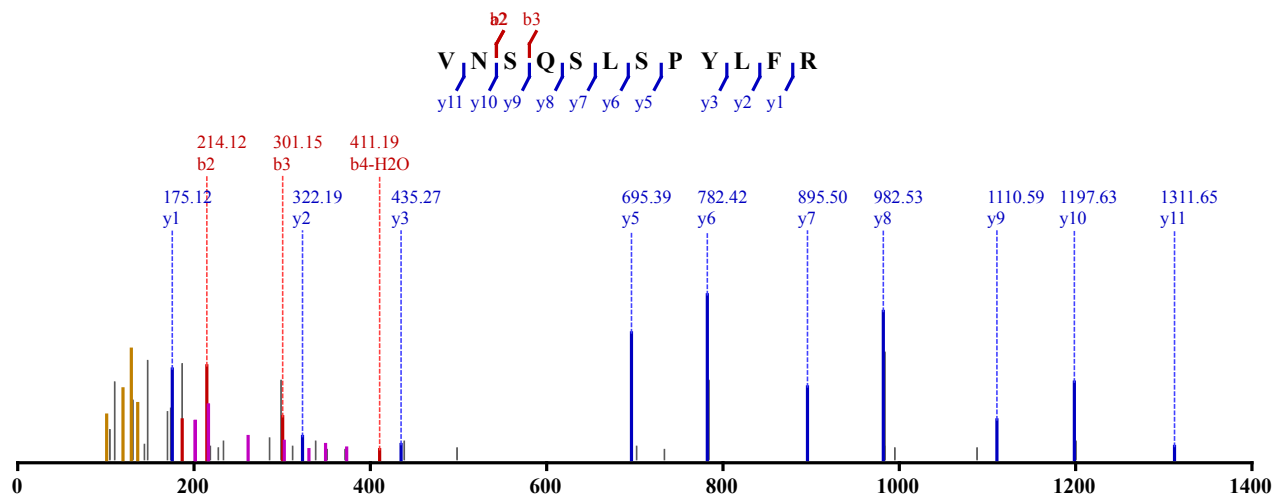

Not Modified

Identified in MSS487 with qvalue 0.00

Charge: 2, Exp. m/z: 705.872, Calc. m/z: 705.872

Data File: HeLa\_ArgC-Try\_pH3\_HCD\_2, Scans: 36088 - 36088

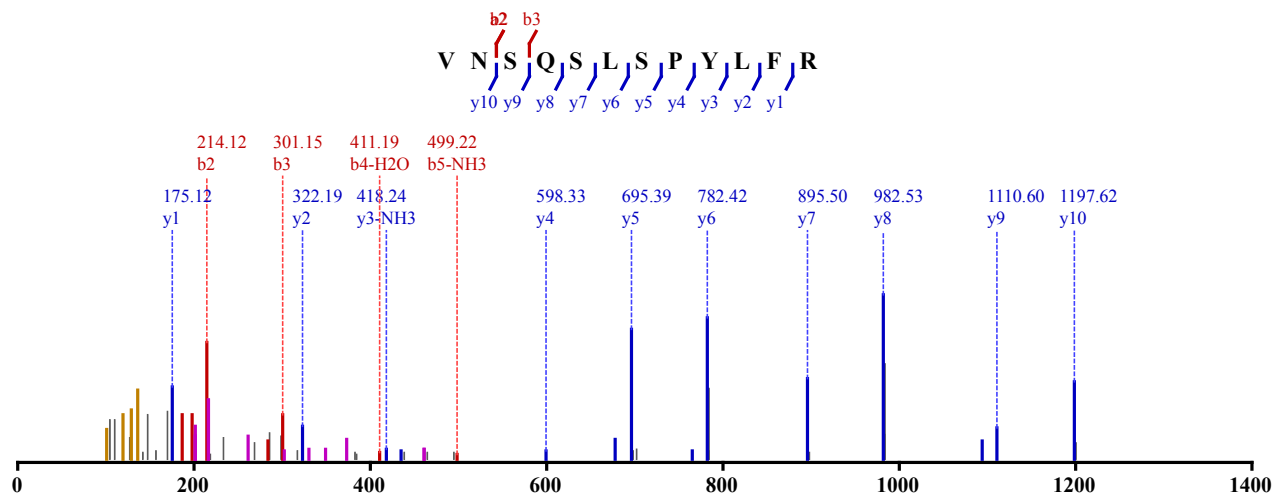

Not Modified

Identified in MSS487 with qvalue 0.00

Charge: 2, Exp. m/z: 705.872, Calc. m/z: 705.872

Data File: HeLa\_ArgC-Try\_pH3\_HCD\_2, Scans: 35984 - 35984

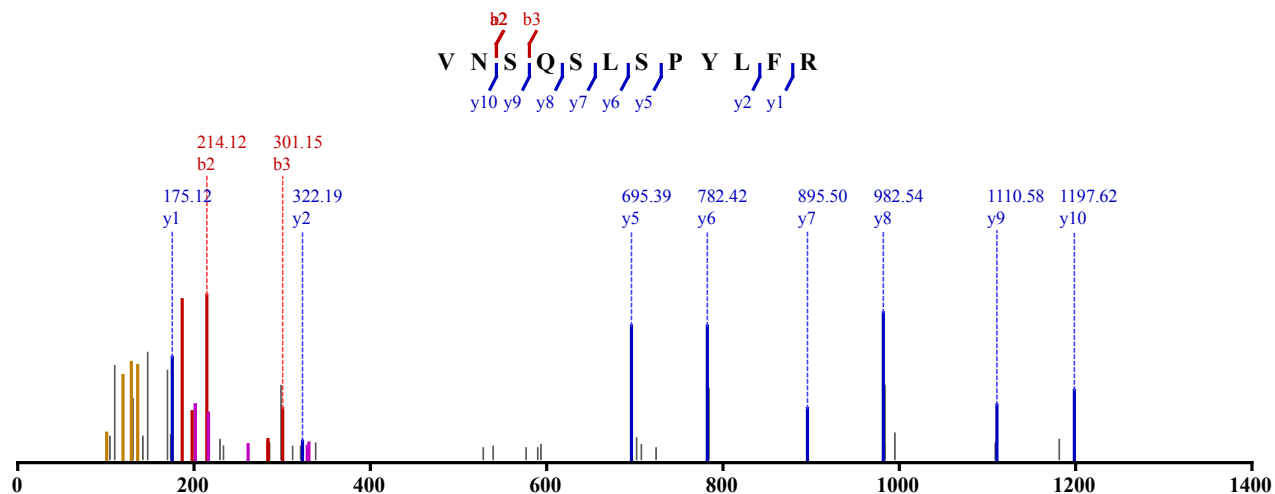

Not Modified

Identified in MSS487 with qvalue 0.00

Charge: 2, Exp. m/z: 705.872, Calc. m/z: 705.872

Data File: HeLa\_ArgC-Try\_pH3\_HCD\_3, Scans: 36948 - 36948

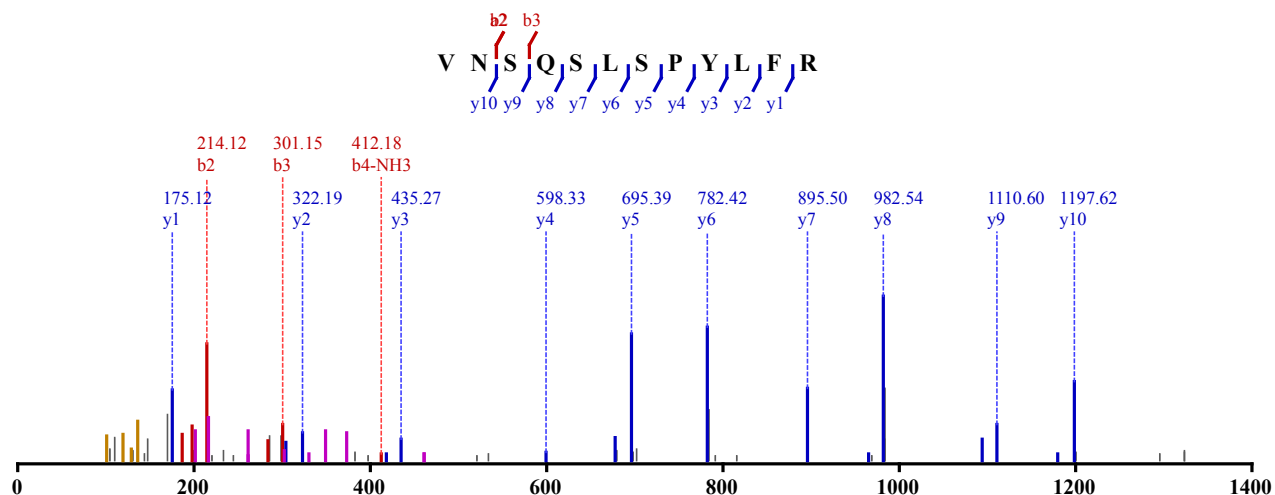

Not Modified

Identified in MSS487 with qvalue 0.00

Charge: 2, Exp. m/z: 705.874, Calc. m/z: 705.872



Data File: HeLa\_ArgC-Try\_pH4\_HCD\_1, Scans: 32439 - 32439

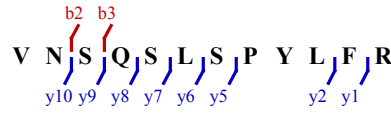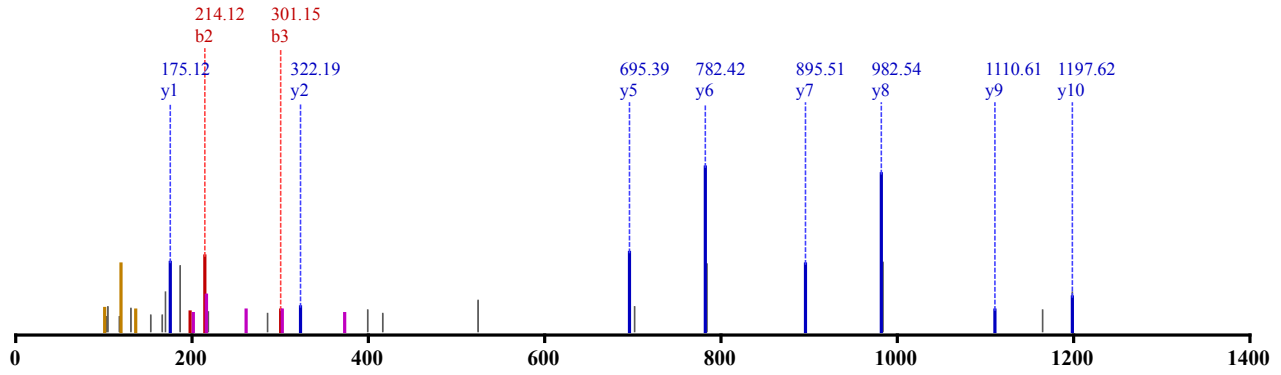

Not Modified

Identified in MSS487 with qvalue 0.00

Charge: 2, Exp. m/z: 705.872, Calc. m/z: 705.872

Data File: HeLa\_ArgC-Try\_pH4\_HCD\_1, Scans: 32515 - 32515

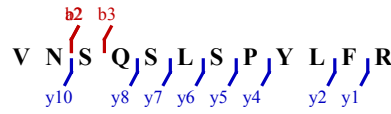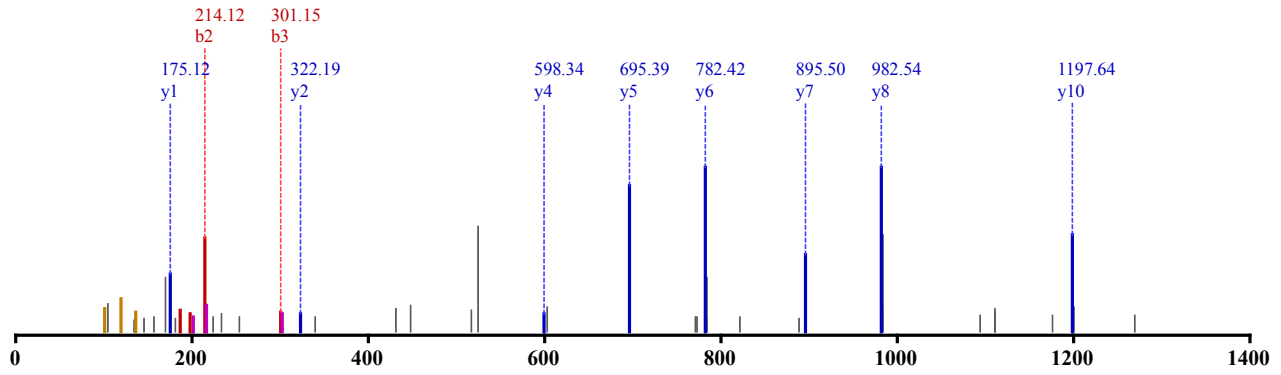

Not Modified

Identified in MSS487 with qvalue 0.00

Charge: 2, Exp. m/z: 705.872, Calc. m/z: 705.872

Data File: HeLa\_ArgC-Try\_pH4\_HCD\_2, Scans: 35242 - 35242

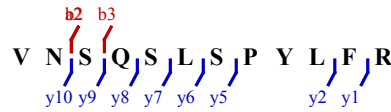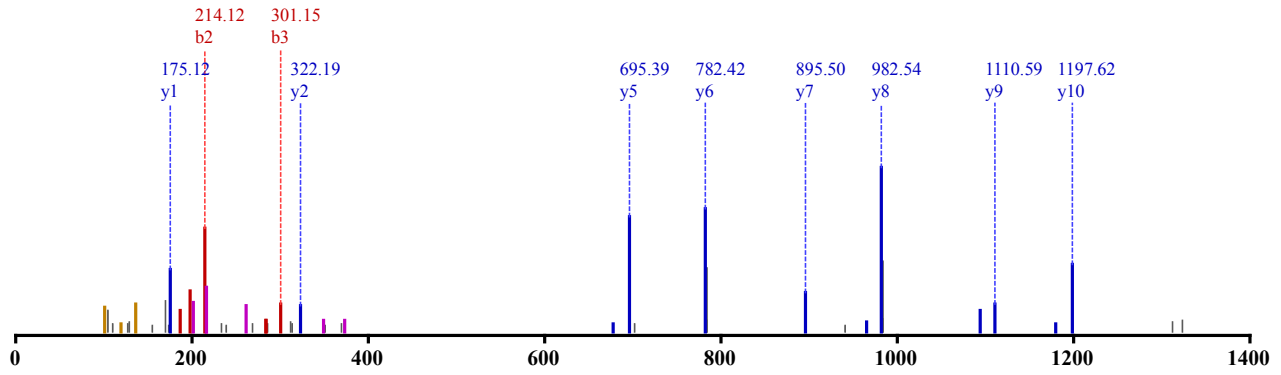

Not Modified

Identified in MSS487 with qvalue 0.00  
 Charge: 2, Exp. m/z: 705.872, Calc. m/z: 705.872  
 Data File: HeLa\_ArgC-Try\_pH5\_HCD\_2, Scans: 36929 - 36929

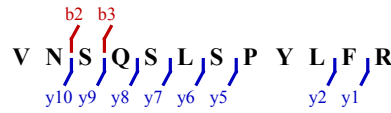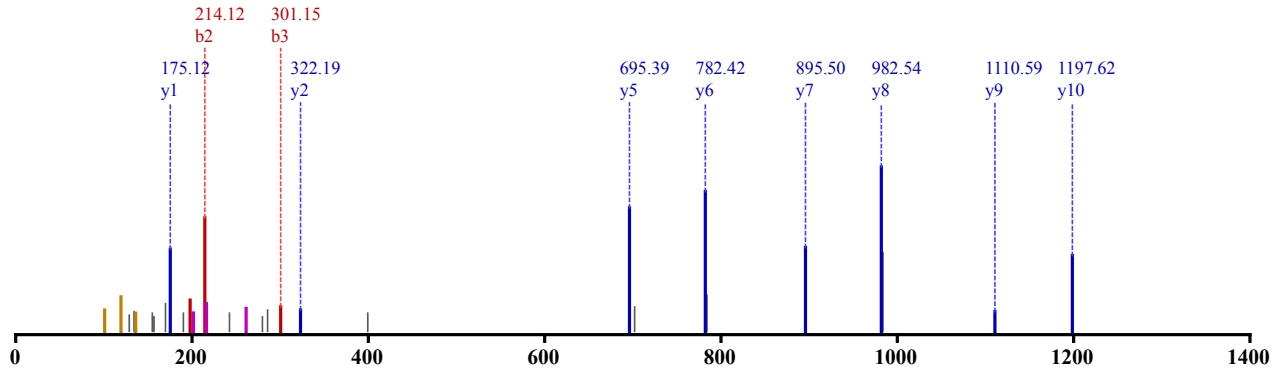

Not Modified  
 Identified in MSS487 with qvalue 0.00  
 Charge: 2, Exp. m/z: 705.872, Calc. m/z: 705.872  
 Data File: HeLa\_ArgC-Try\_pH5\_HCD\_3, Scans: 38004 - 38004

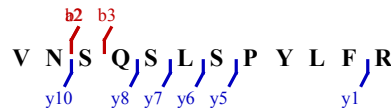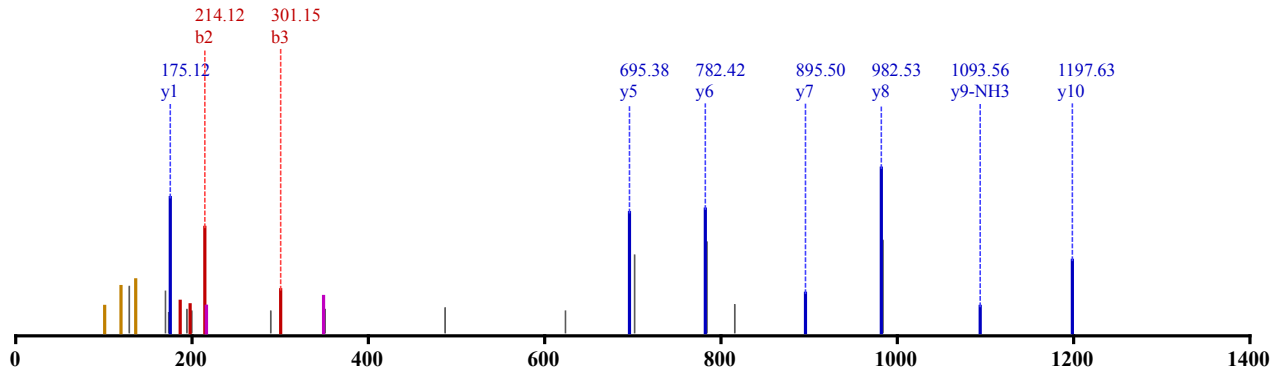

Not Modified  
 Identified in MSS484 with qvalue 0.00  
 Charge: 3, Exp. m/z: 1247.880, Calc. m/z: 1247.881  
 Data File: HeLa\_Try\_pH2\_HCD\_3, Scans: 33762 - 33762

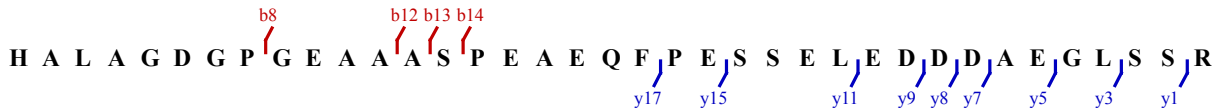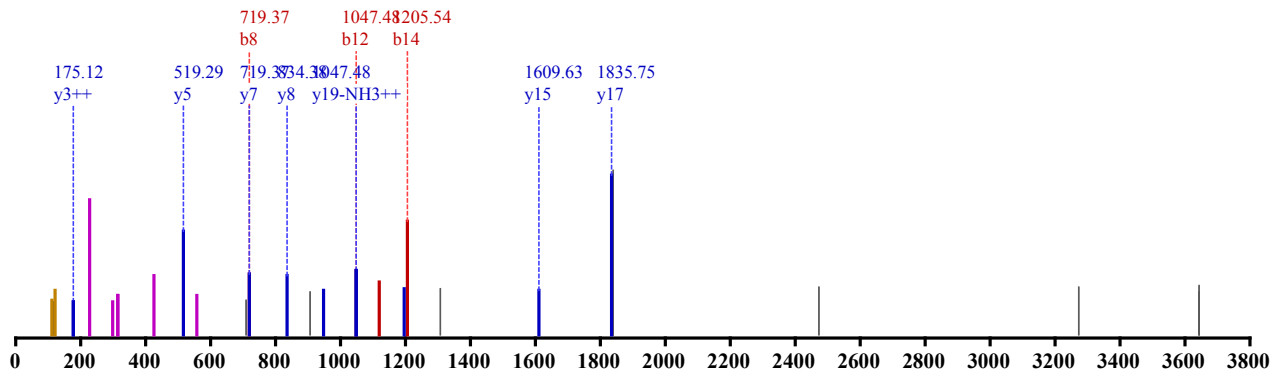

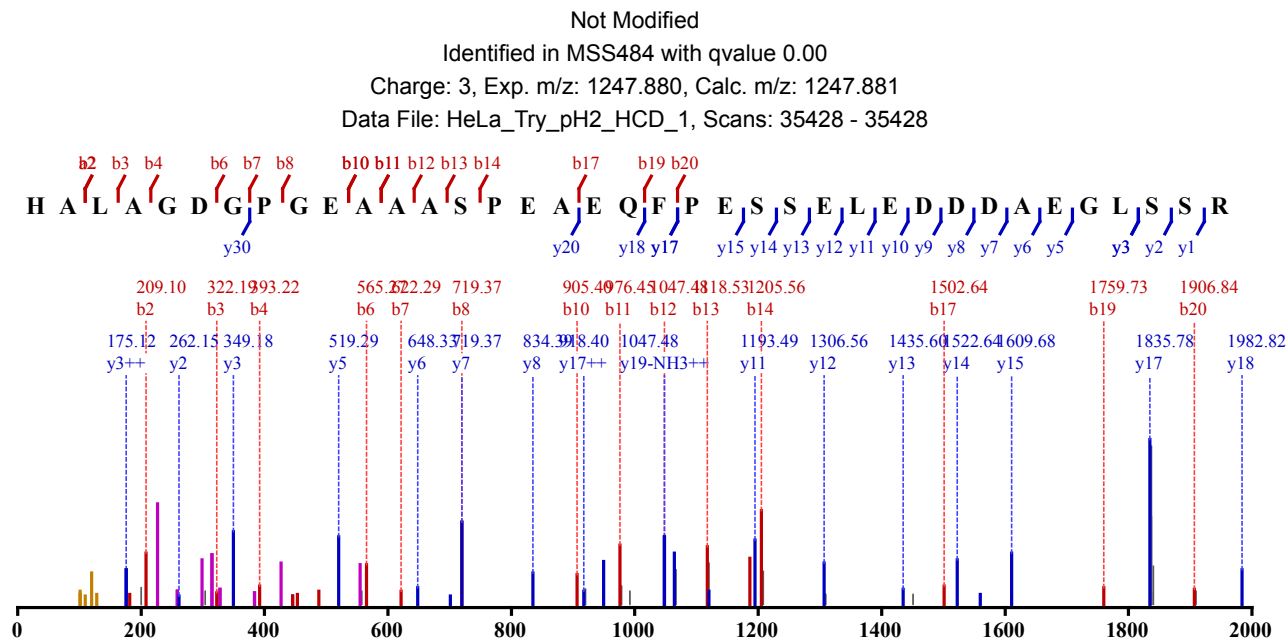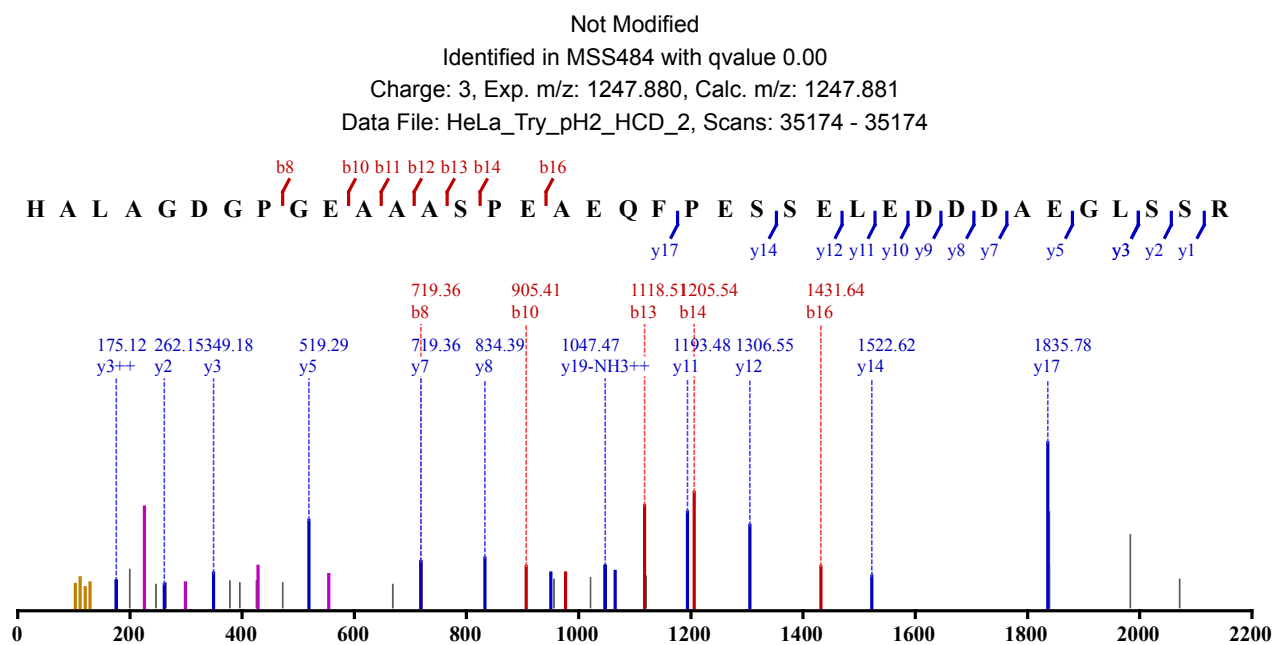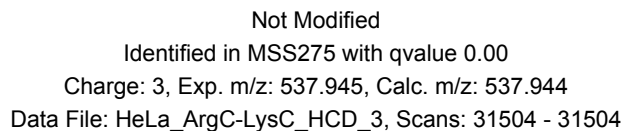

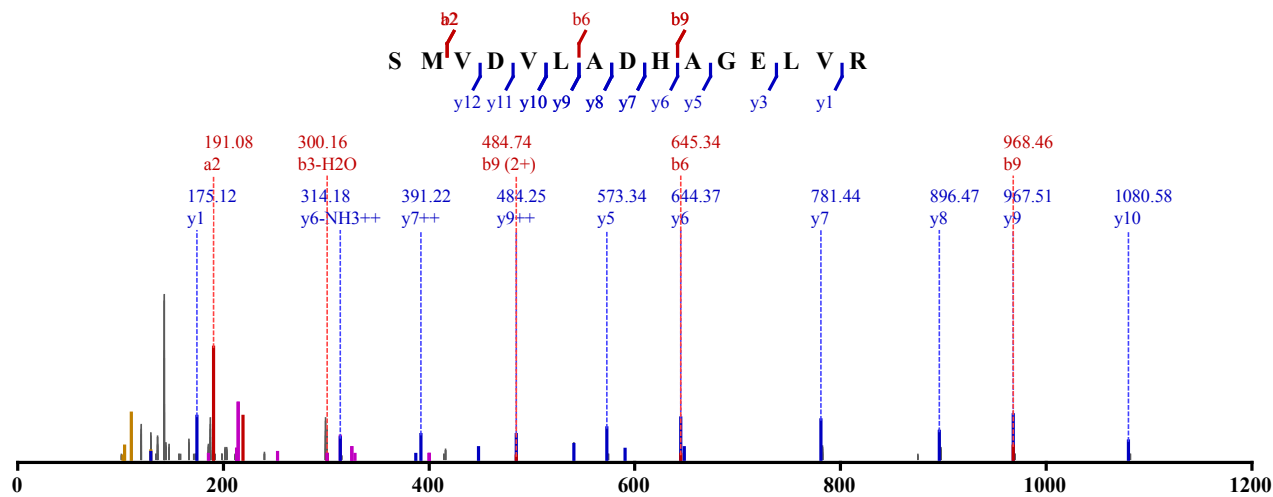

1 x Oxidation (M)

Identified in MSS482 with qvalue 0.00

Charge: 2, Exp. m/z: 809.867, Calc. m/z: 809.862

Data File: HeLa\_GluC\_pH5\_CID\_3xload\_2, Scans: 16468 - 16468

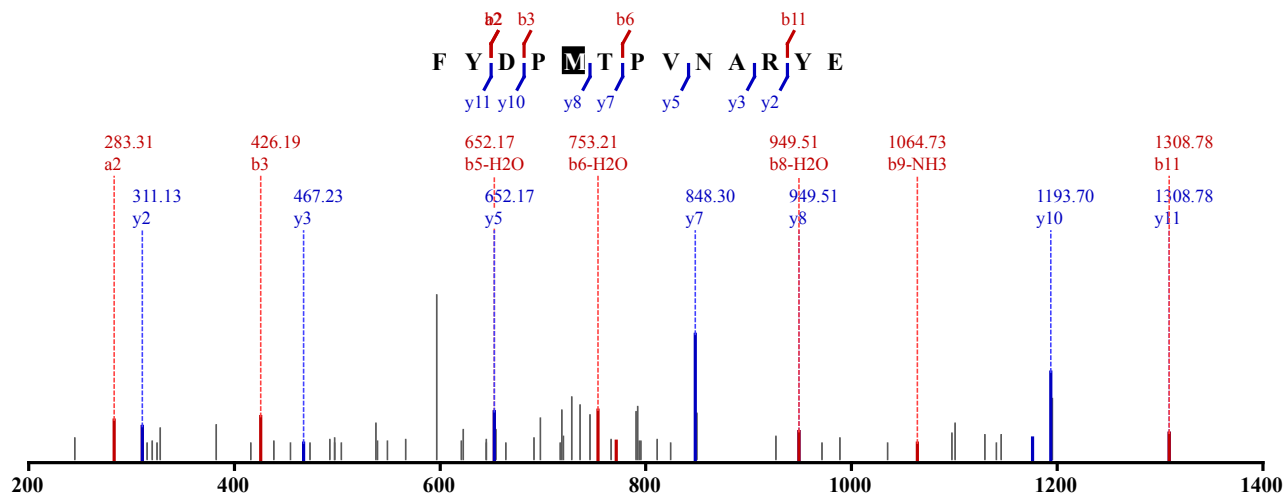

1 x Oxidation (M)

Identified in MSS482 with qvalue 0.00

Charge: 2, Exp. m/z: 809.865, Calc. m/z: 809.862

Data File: HeLa\_GluC\_80pcACN\_CID\_3xload\_2, Scans: 18123 - 18123

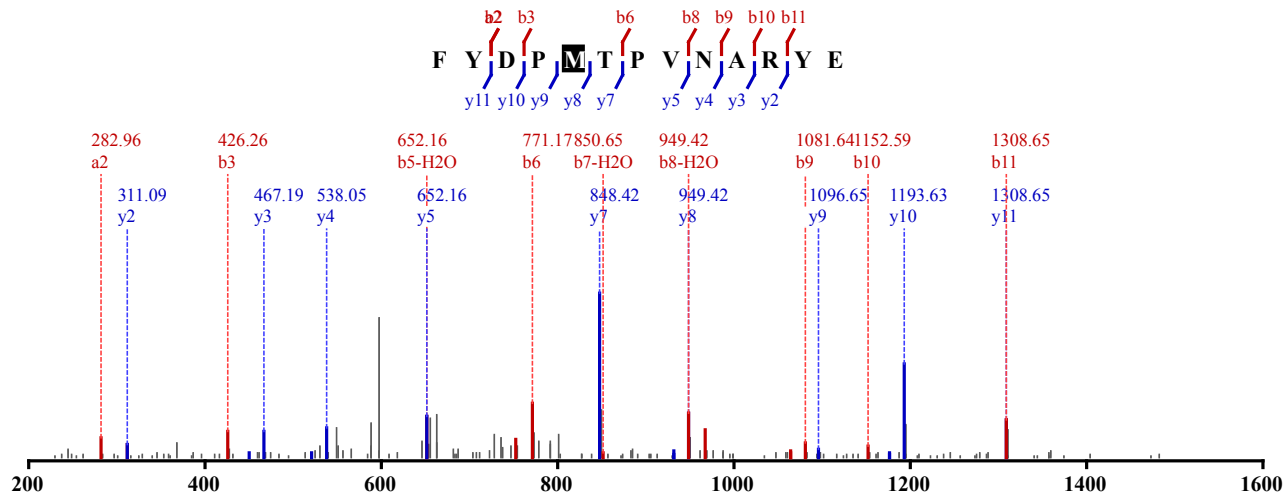

1 x Oxidation (M)

Identified in MSS482 with qvalue 0.00

Charge: 2, Exp. m/z: 809.863, Calc. m/z: 809.862

Data File: HeLa\_GluC\_80pcACN\_CID\_3xload, Scans: 16772 - 16772

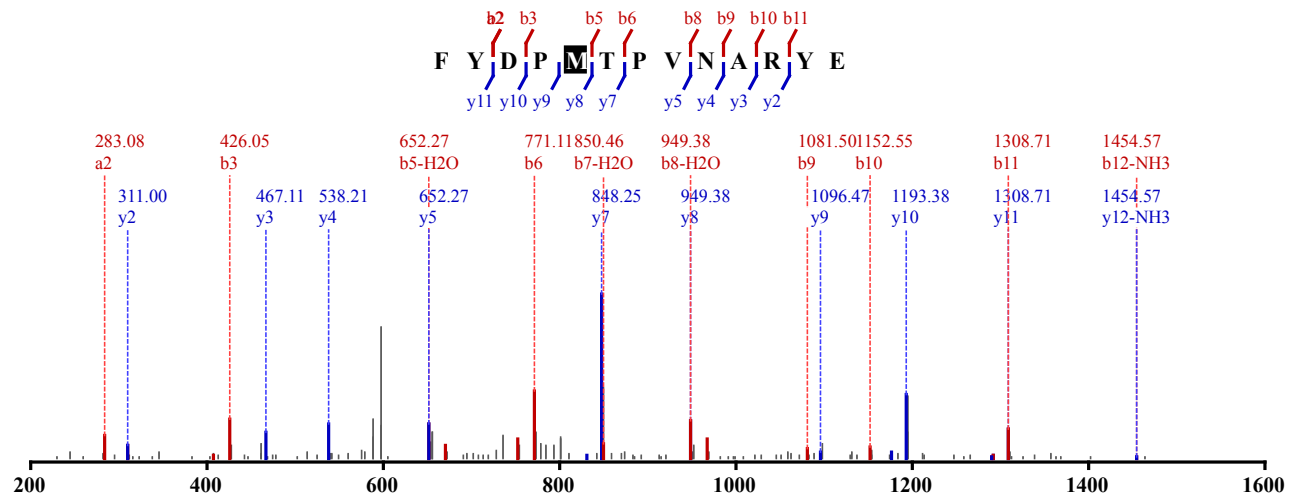

1 x Oxidation (M)

Identified in MSS482 with qvalue 0.00

Charge: 2, Exp. m/z: 809.864, Calc. m/z: 809.862

Data File: HeLa\_GluC\_pH4\_CID\_3xload\_2, Scans: 16216 - 16216

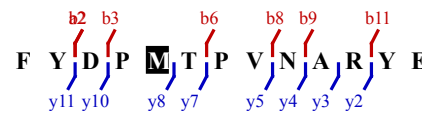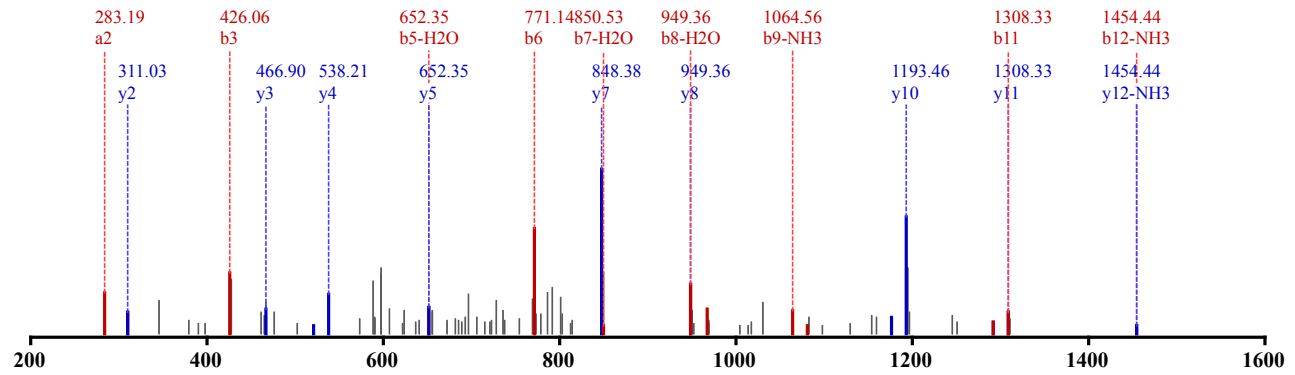

1 x Oxidation (M)

Identified in MSS482 with qvalue 0.00

Charge: 2, Exp. m/z: 809.864, Calc. m/z: 809.862

Data File: HeLa\_GluC\_pH4\_CID\_3xload\_2, Scans: 16282 - 16282

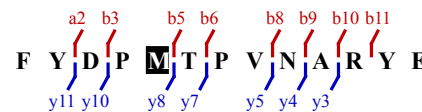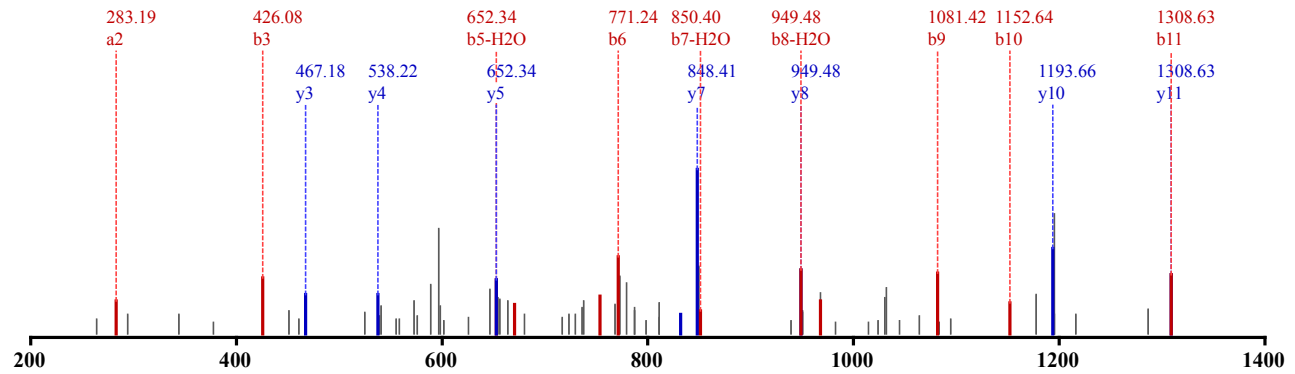

1 x Oxidation (M)

Identified in MSS482 with qvalue 0.00

Charge: 2, Exp. m/z: 809.865, Calc. m/z: 809.862

Data File: HeLa\_GluC\_pH4\_CID\_3xload\_3, Scans: 15886 - 15886

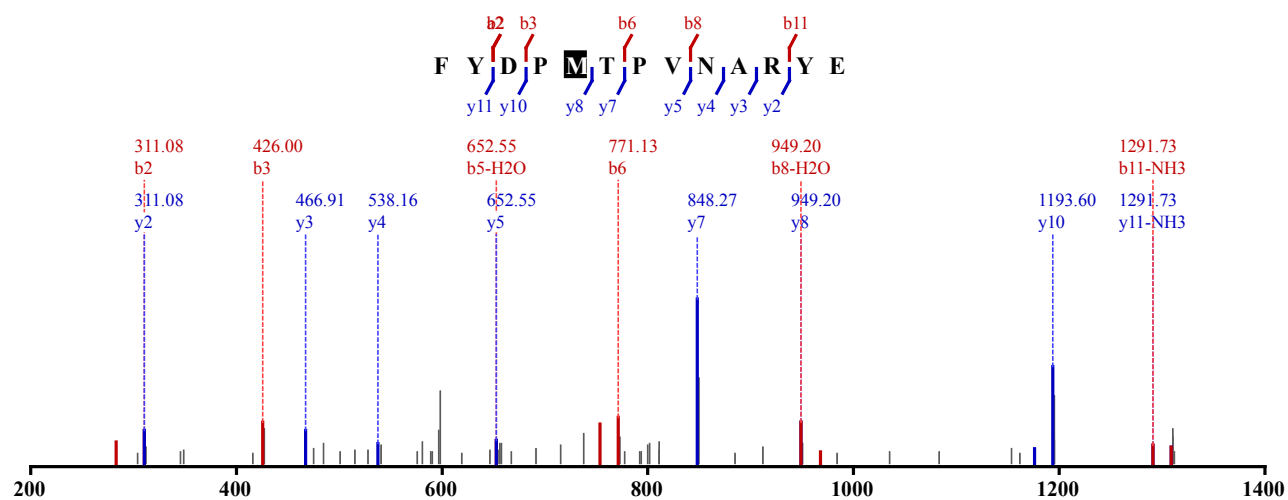

1 x Oxidation (M)

Identified in MSS482 with qvalue 0.00

Charge: 2, Exp. m/z: 809.865, Calc. m/z: 809.862

Data File: HeLa\_GluC\_pH4\_CID\_3xload\_3, Scans: 15943 - 15943

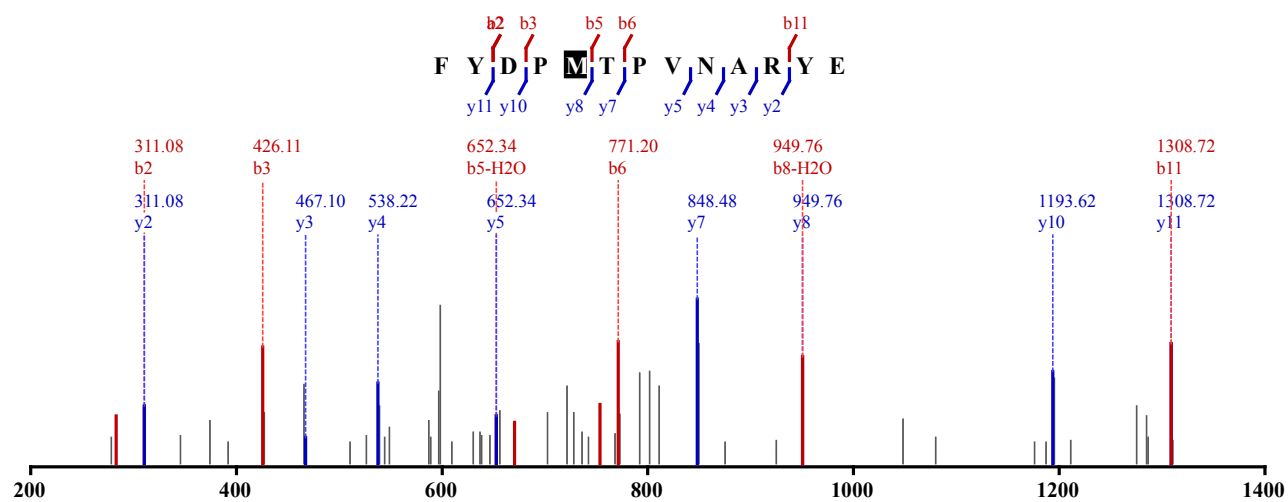

1 x Oxidation (M)

Identified in MSS482 with qvalue 0.00

Charge: 2, Exp. m/z: 809.865, Calc. m/z: 809.862

Data File: HeLa\_GluC\_pH4\_CID\_3xload, Scans: 15819 - 15819

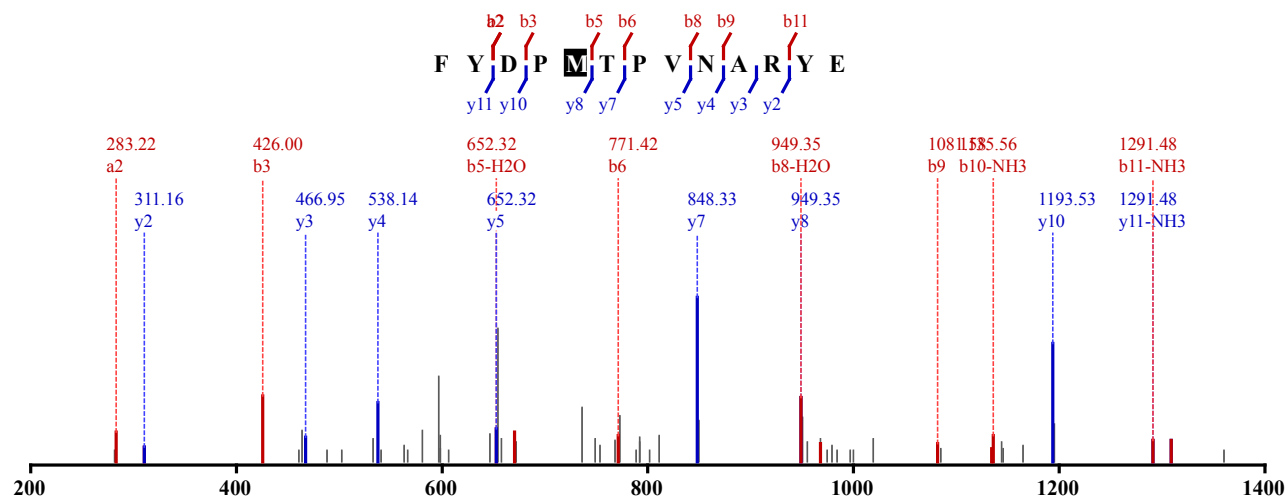

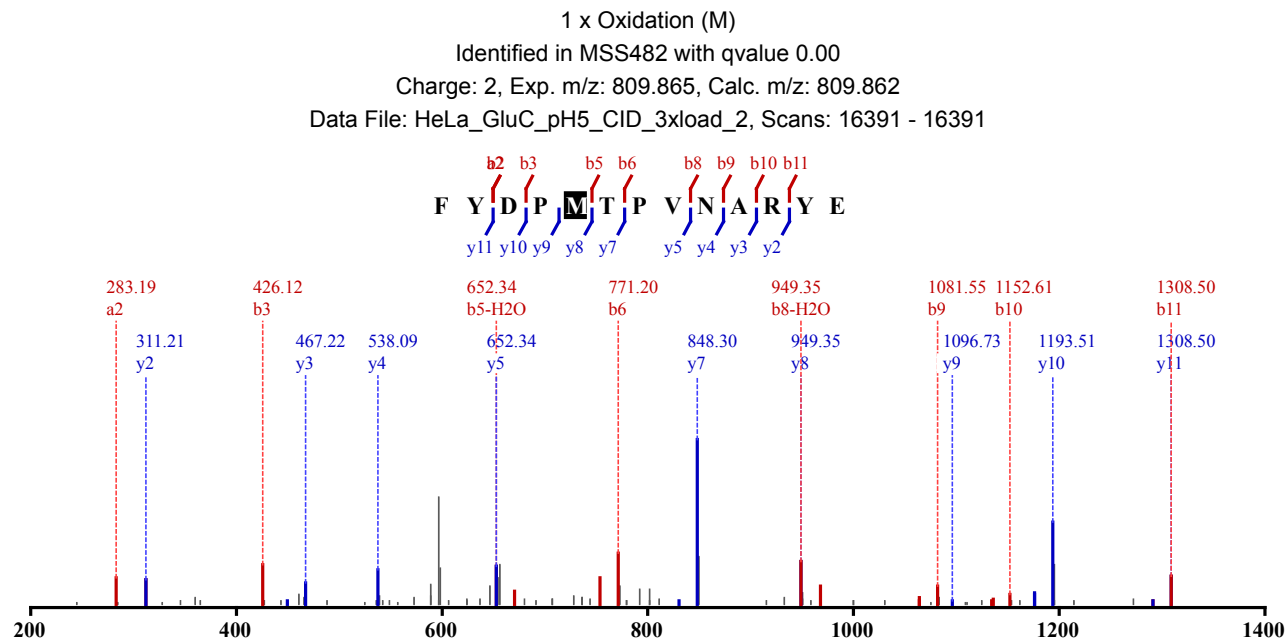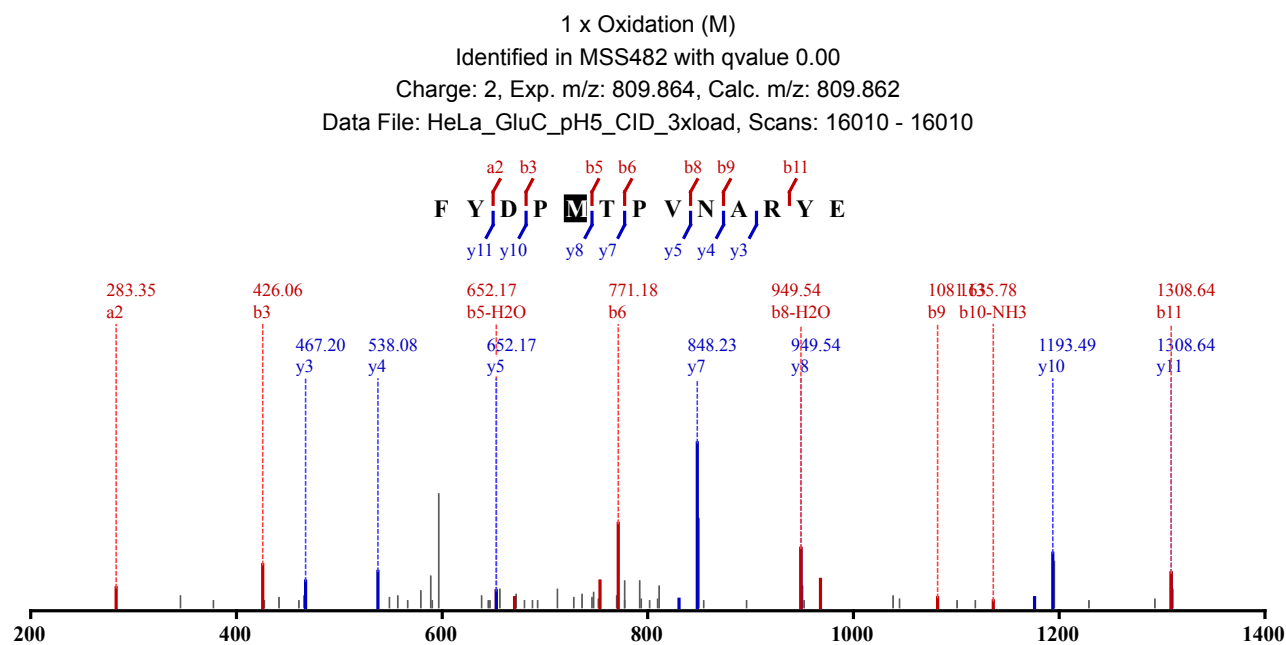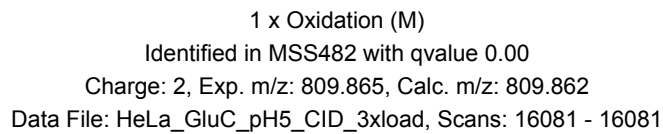

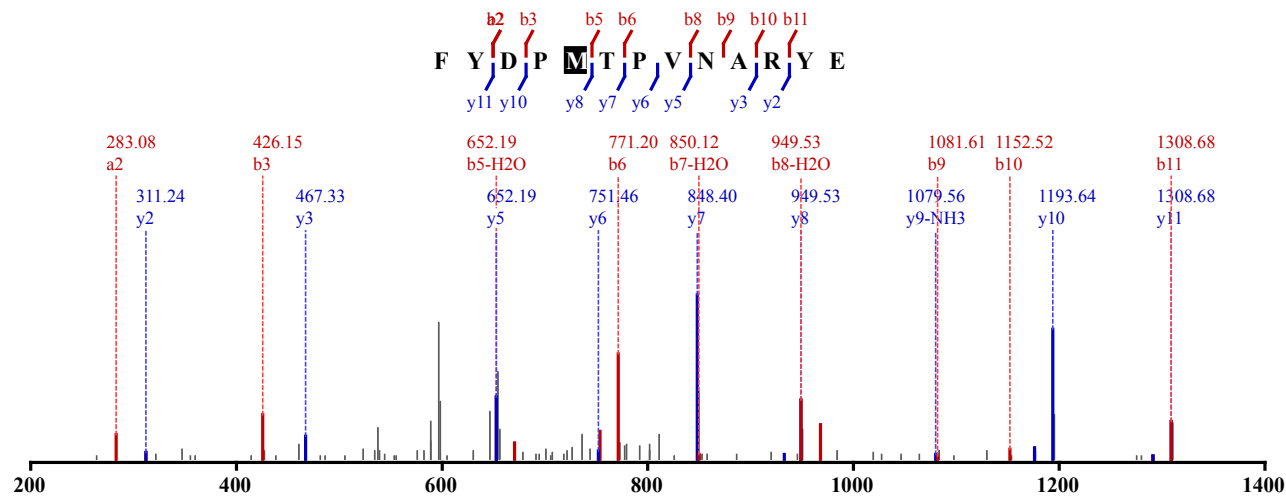

1 x Oxidation (M)

Identified in MSS482 with qvalue 0.00

Charge: 2, Exp. m/z: 809.866, Calc. m/z: 809.862

Data File: HeLa\_GluC\_pH6\_CID\_3xload\_2, Scans: 17910 - 17910

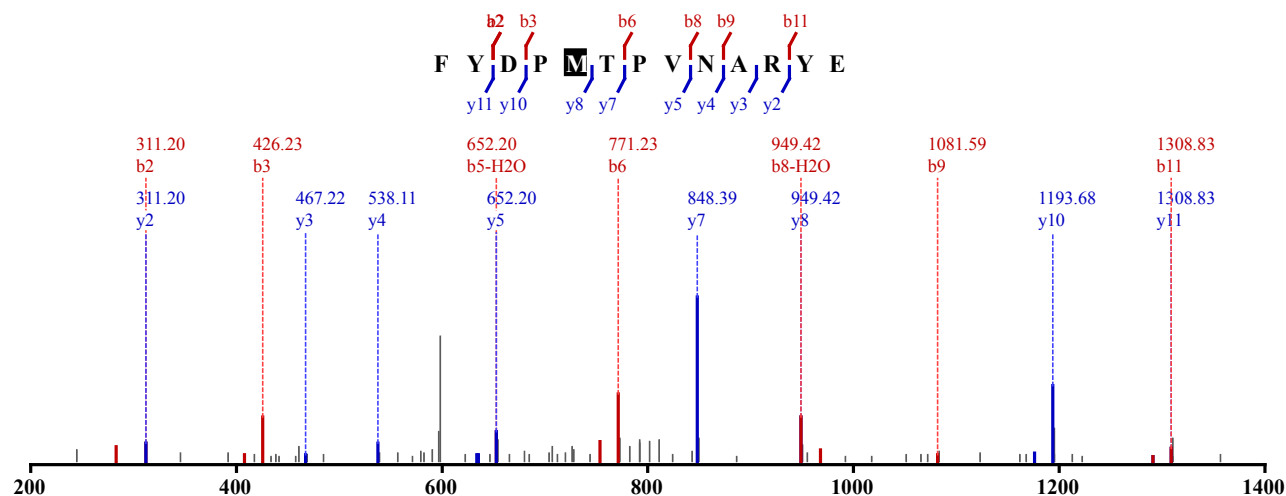

1 x Oxidation (M)

Identified in MSS482 with qvalue 0.00

Charge: 2, Exp. m/z: 809.865, Calc. m/z: 809.862

Data File: HeLa\_GluC\_pH6\_CID\_3xload\_2, Scans: 18051 - 18051

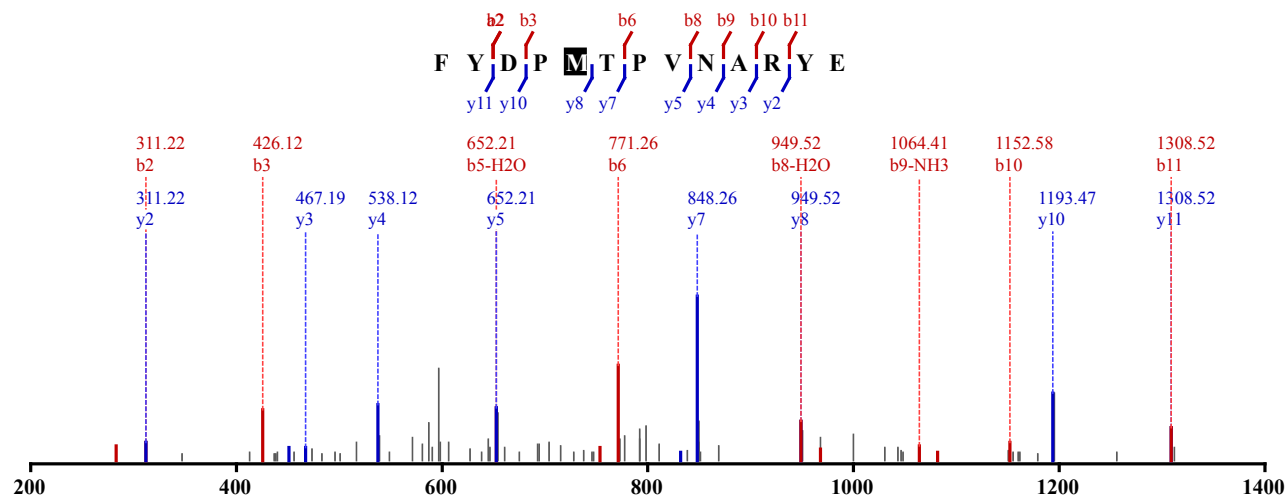

1 x Oxidation (M)

Identified in MSS482 with qvalue 0.00

Charge: 2, Exp. m/z: 809.865, Calc. m/z: 809.862



Data File: HeLa\_GluC\_pH6\_CID\_3xload\_3, Scans: 17785 - 17785

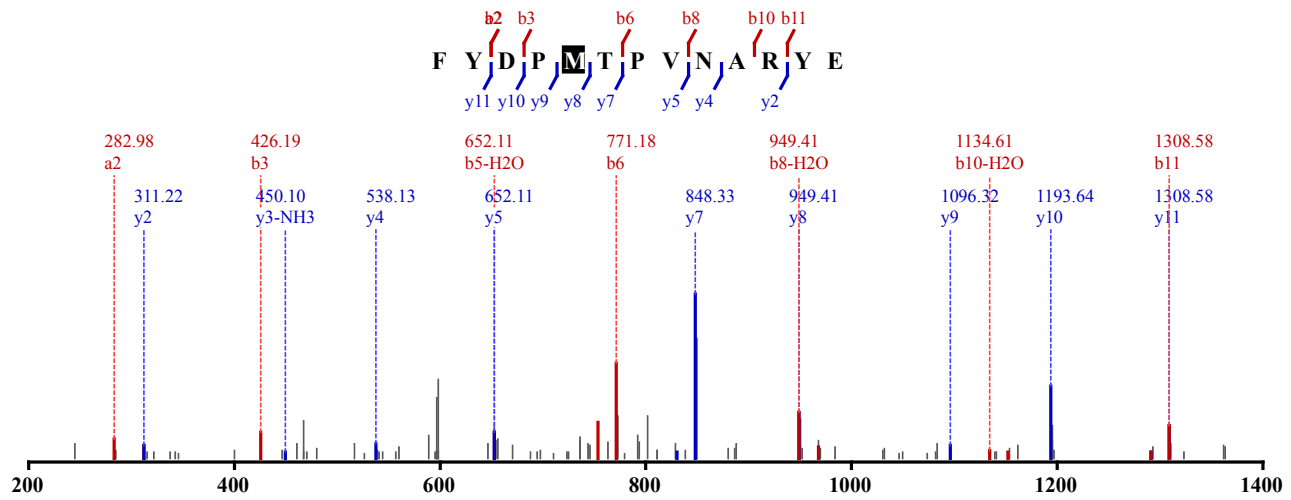

1 x Oxidation (M)

Identified in MSS482 with qvalue 0.00

Charge: 2, Exp. m/z: 809.865, Calc. m/z: 809.862

Data File: HeLa\_GluC\_pH6\_CID\_3xload\_3, Scans: 17856 - 17856

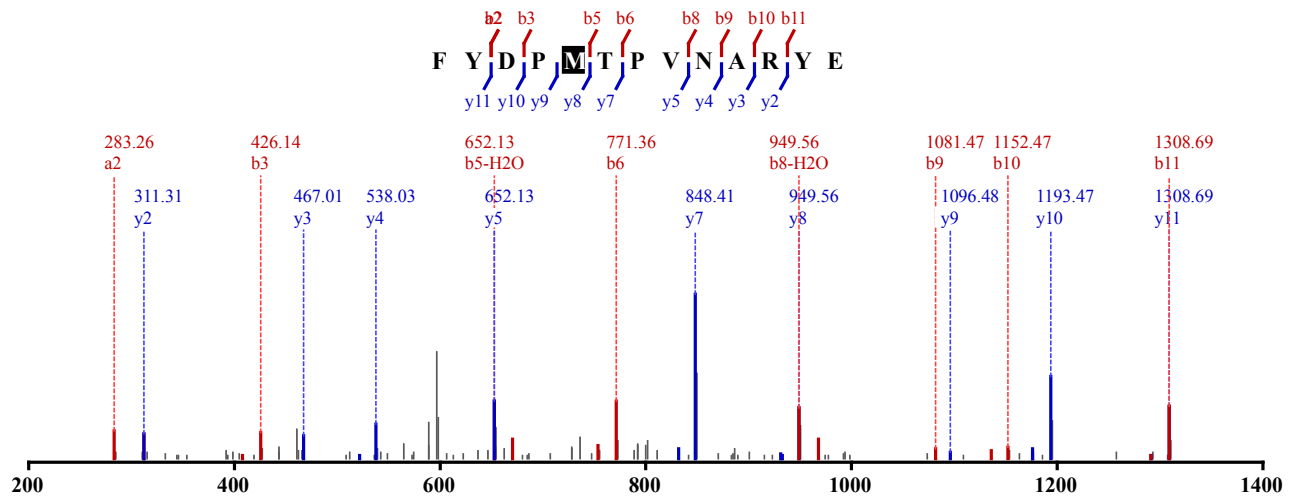

1 x Oxidation (M)

Identified in MSS482 with qvalue 0.00

Charge: 2, Exp. m/z: 809.865, Calc. m/z: 809.862

Data File: HeLa\_GluC\_pH6\_CID\_3xload\_3, Scans: 17931 - 17931

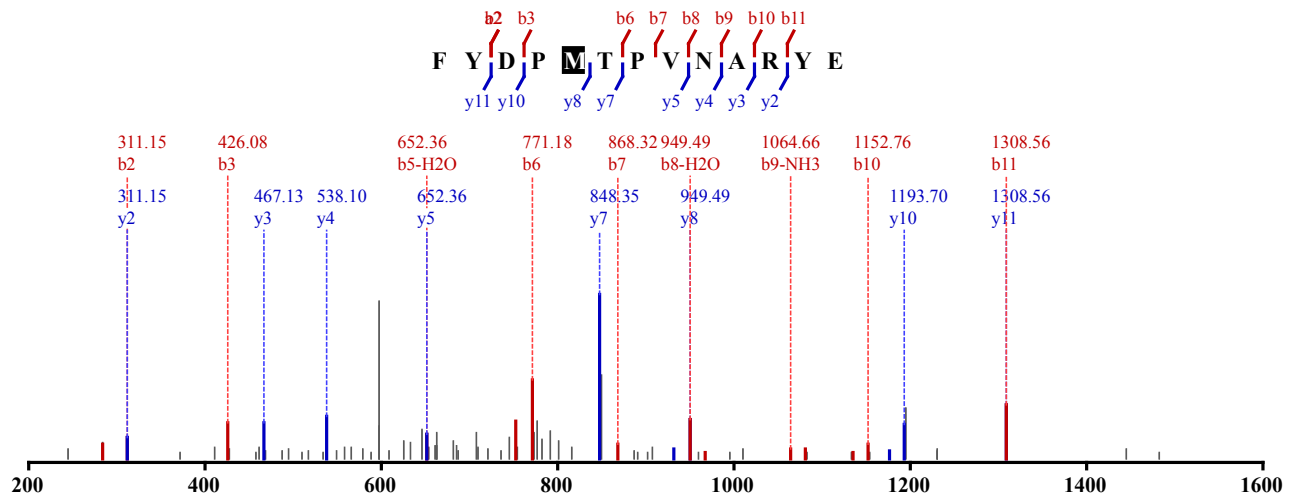

1 x Oxidation (M)

Identified in MSS482 with qvalue 0.00

Charge: 2, Exp. m/z: 809.865, Calc. m/z: 809.862

Data File: HeLa\_GluC\_pH6\_CID\_3xload, Scans: 17887 - 17887

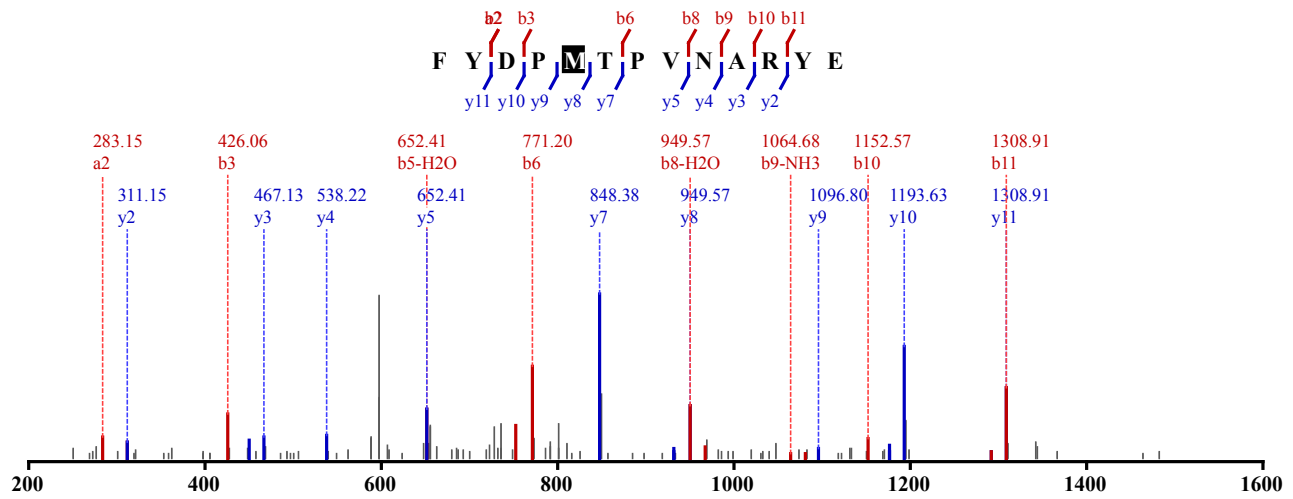

1 x Oxidation (M)

Identified in MSS482 with qvalue 0.00

Charge: 2, Exp. m/z: 809.864, Calc. m/z: 809.862

Data File: HeLa\_GluC\_pH6\_CID\_3xload, Scans: 17955 - 17955

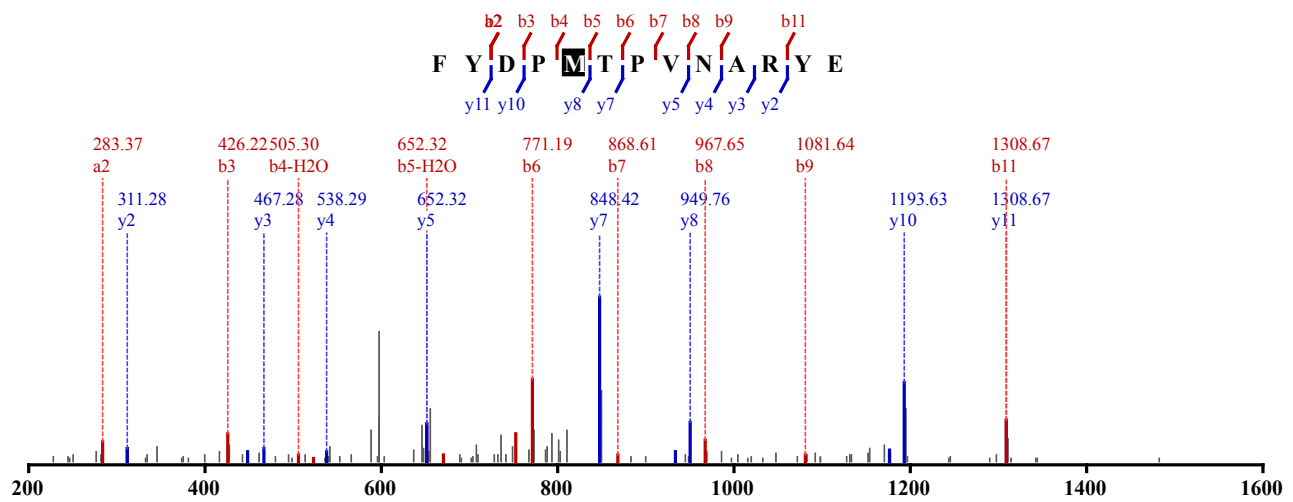

1 x Oxidation (M)

Identified in MSS482 with qvalue 0.00

Charge: 2, Exp. m/z: 809.865, Calc. m/z: 809.862

Data File: HeLa\_GluC\_pH5\_CID\_3xload\_3, Scans: 16496 - 16496

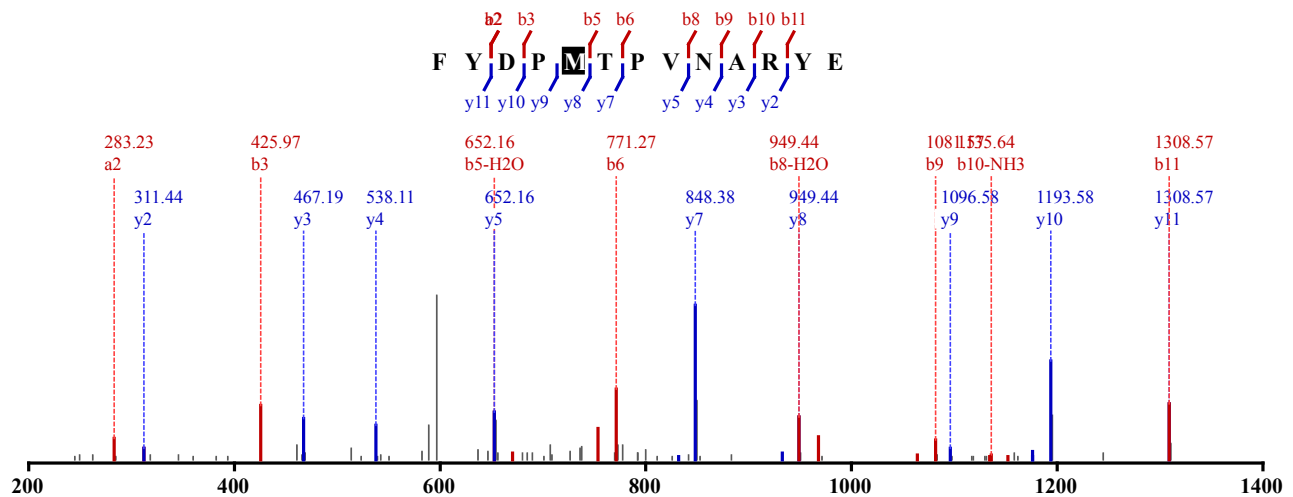

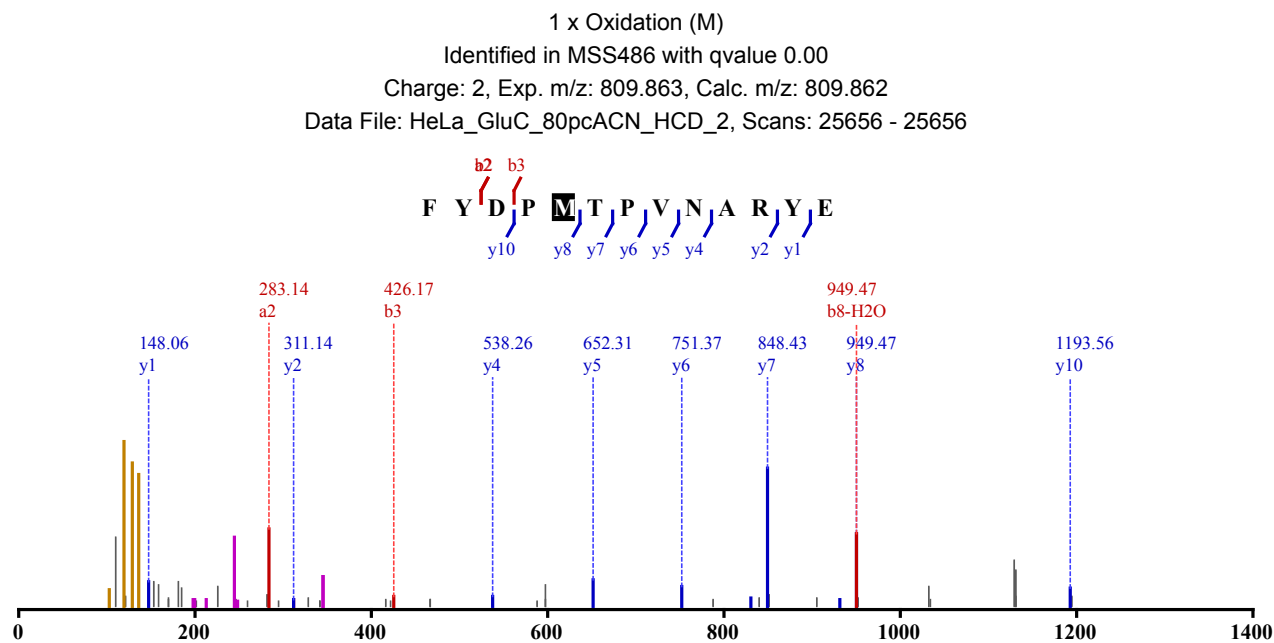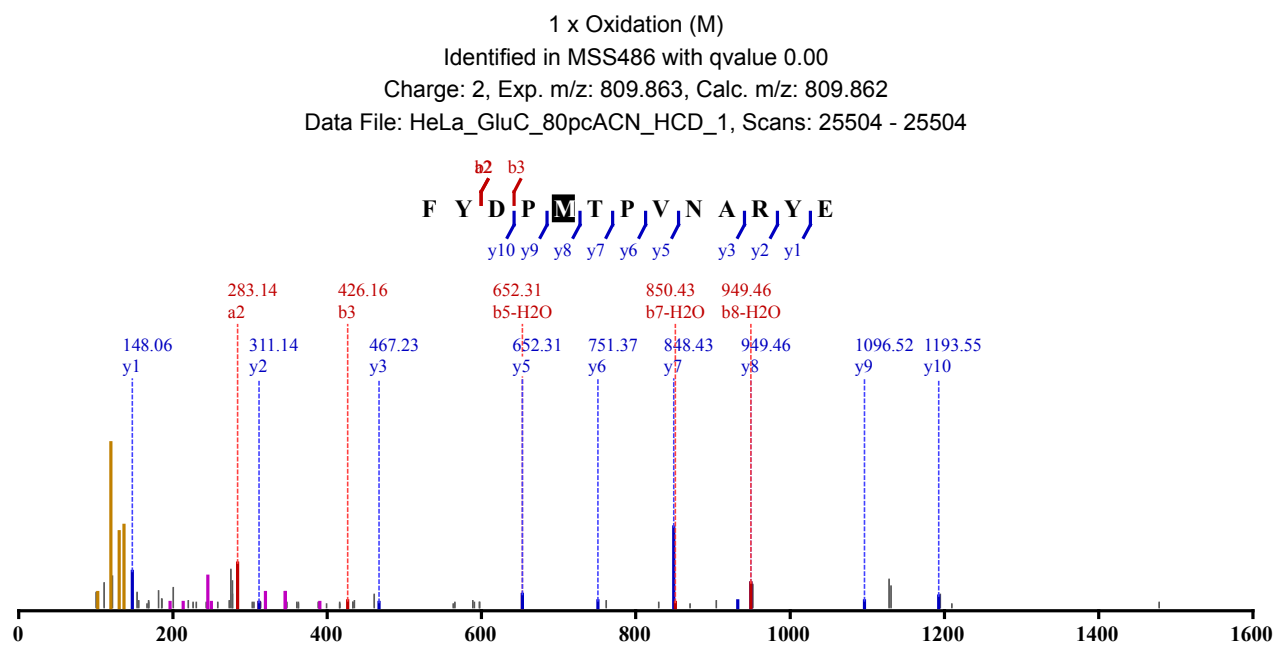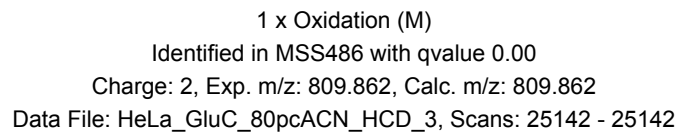

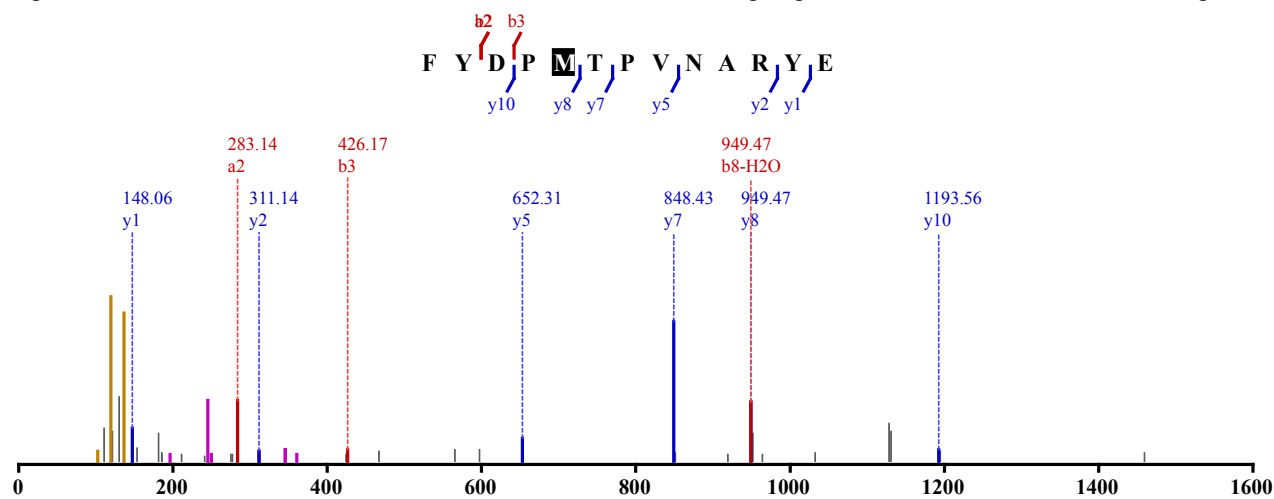

1 x Oxidation (M)

Identified in MSS486 with qvalue 0.00

Charge: 2, Exp. m/z: 809.863, Calc. m/z: 809.862

Data File: HeLa\_GluC\_pH5\_HCD\_1, Scans: 26606 - 26606

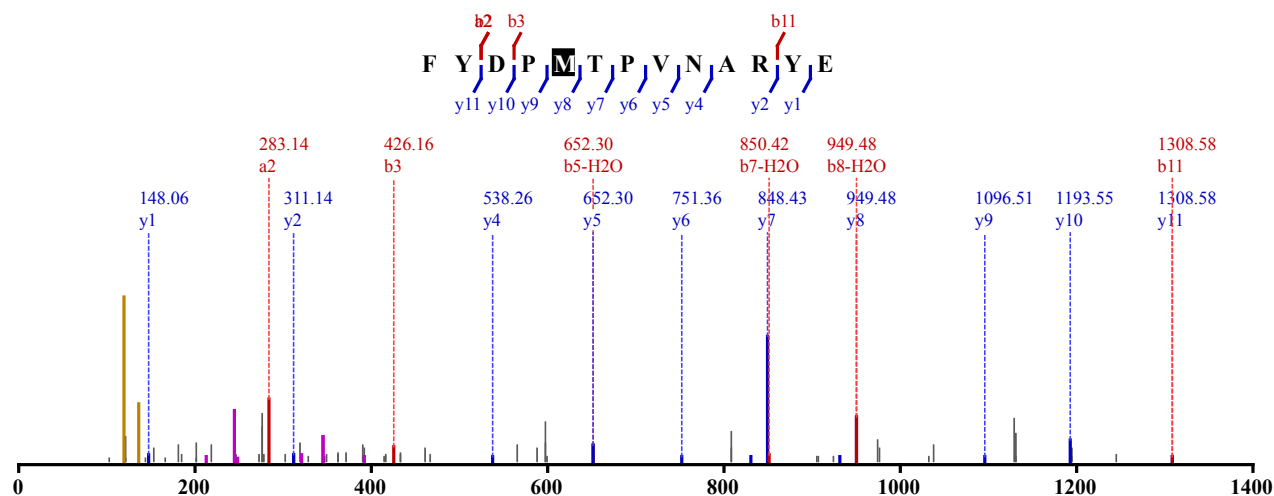

1 x Oxidation (M)

Identified in MSS486 with qvalue 0.01

Charge: 2, Exp. m/z: 809.863, Calc. m/z: 809.862

Data File: HeLa\_GluC\_pH5\_HCD\_1, Scans: 26526 - 26526

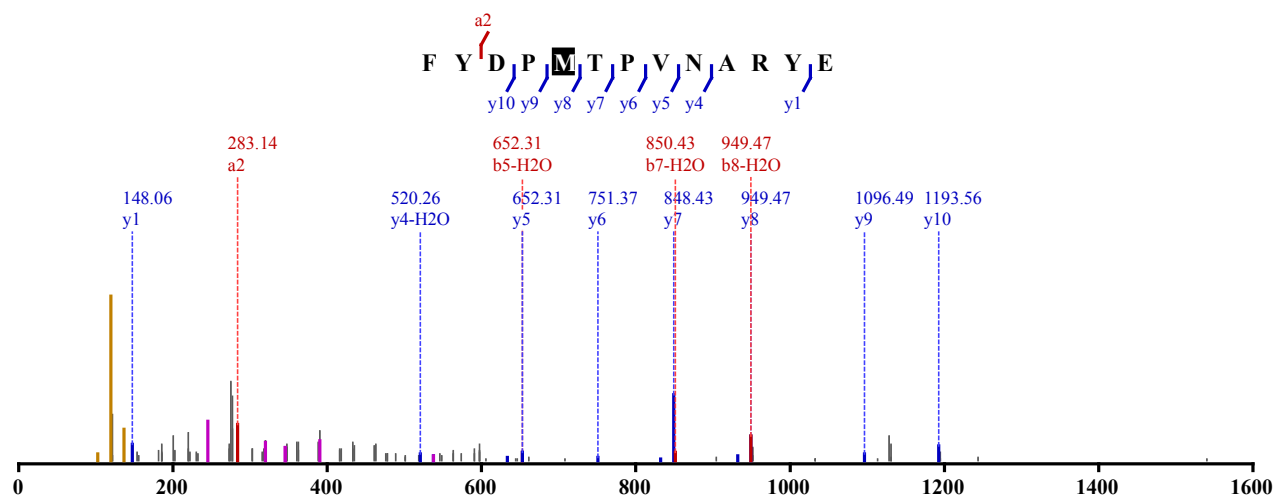

1 x Oxidation (M)

Identified in MSS486 with qvalue 0.00

Charge: 2, Exp. m/z: 809.864, Calc. m/z: 809.862

Data File: HeLa\_GluC\_pH6\_HCD\_2, Scans: 27848 - 27848

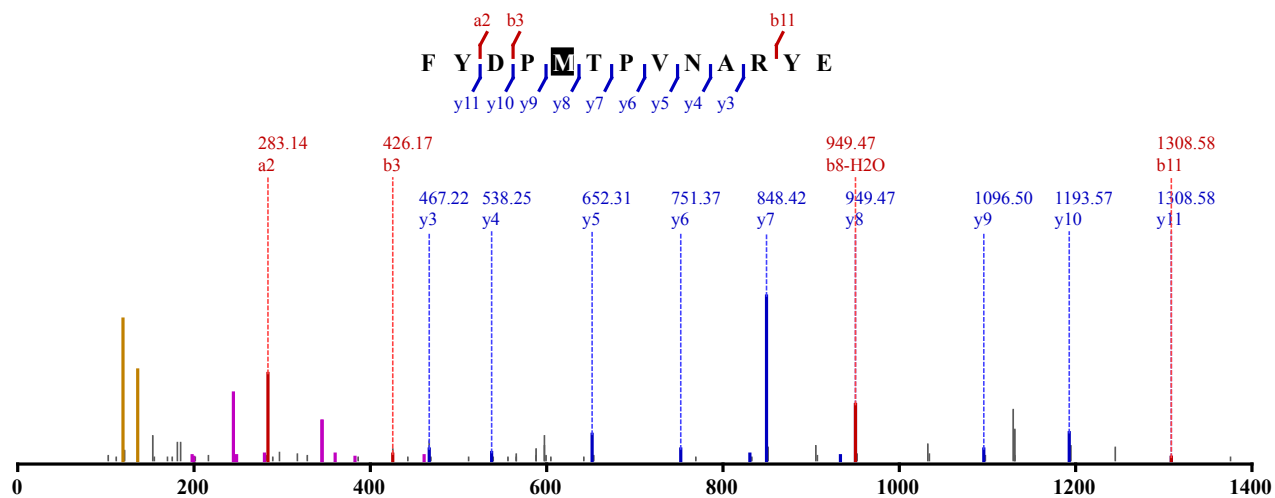

1 x Oxidation (M)

Identified in MSS486 with qvalue 0.00

Charge: 2, Exp. m/z: 809.863, Calc. m/z: 809.862

Data File: HeLa\_GluC\_pH4\_HCD\_2, Scans: 25519 - 25519

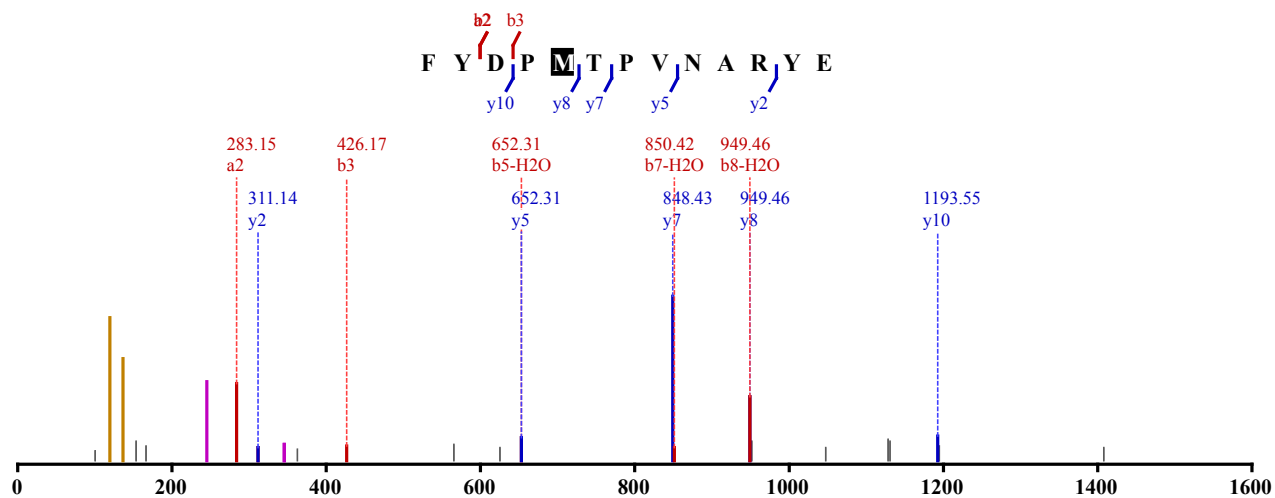

1 x Oxidation (M)

Identified in MSS486 with qvalue 0.00

Charge: 2, Exp. m/z: 809.863, Calc. m/z: 809.862

Data File: HeLa\_GluC\_pH5\_HCD\_2, Scans: 26087 - 26087

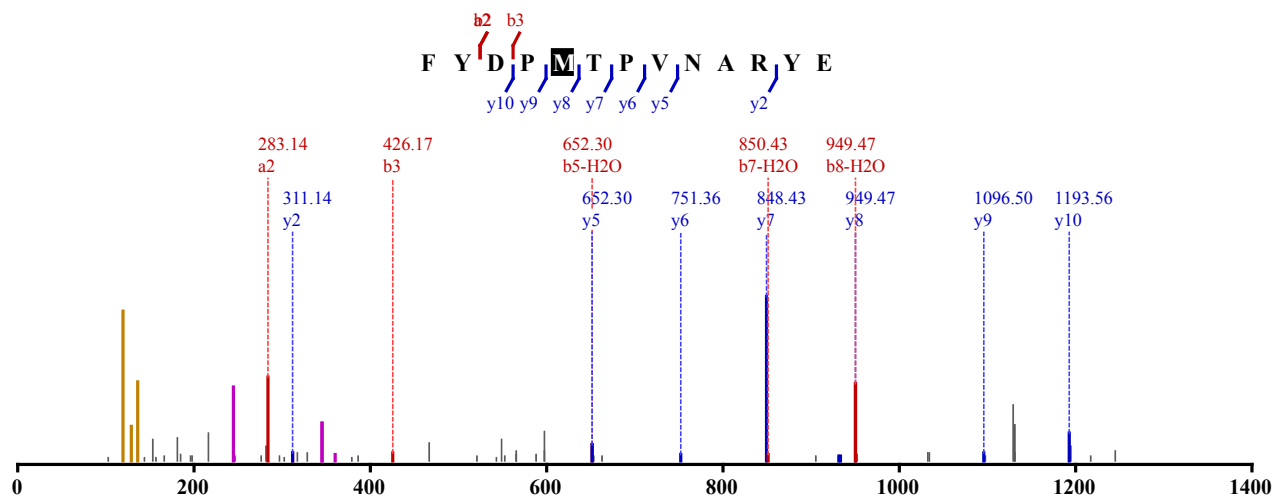

1 x Oxidation (M)

Identified in MSS486 with qvalue 0.00  
 Charge: 2, Exp. m/z: 809.863, Calc. m/z: 809.862  
 Data File: HeLa\_GluC\_pH5\_HCD\_2, Scans: 26164 - 26164

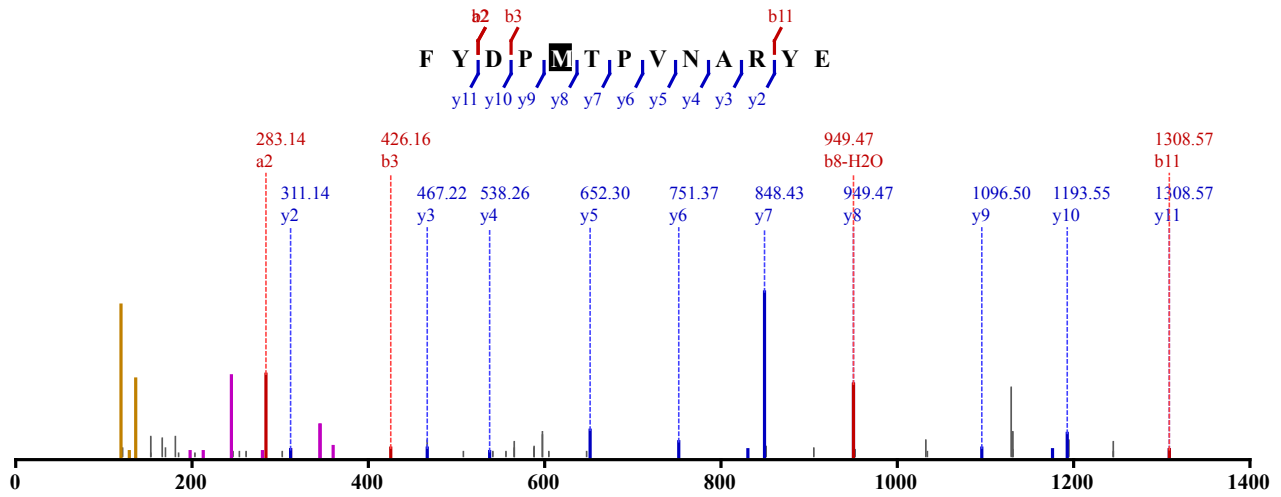

1 x Oxidation (M)  
 Identified in MSS486 with qvalue 0.00  
 Charge: 2, Exp. m/z: 809.865, Calc. m/z: 809.862  
 Data File: HeLa\_GluC\_pH5\_HCD\_3, Scans: 25956 - 25956

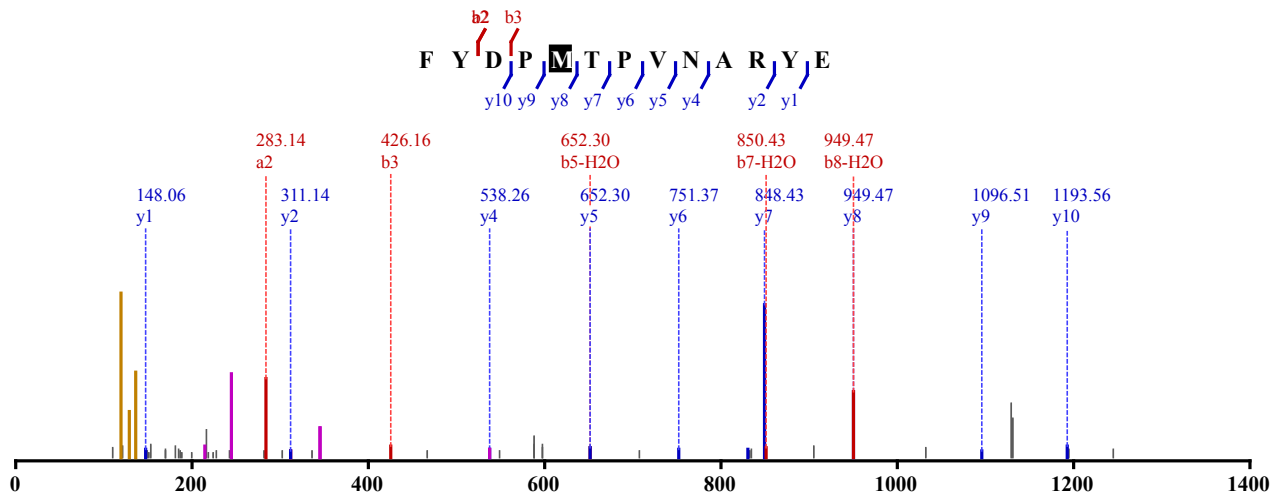

1 x Oxidation (M)  
 Identified in MSS486 with qvalue 0.00  
 Charge: 2, Exp. m/z: 809.863, Calc. m/z: 809.862  
 Data File: HeLa\_GluC\_pH5\_HCD\_3, Scans: 26028 - 26028

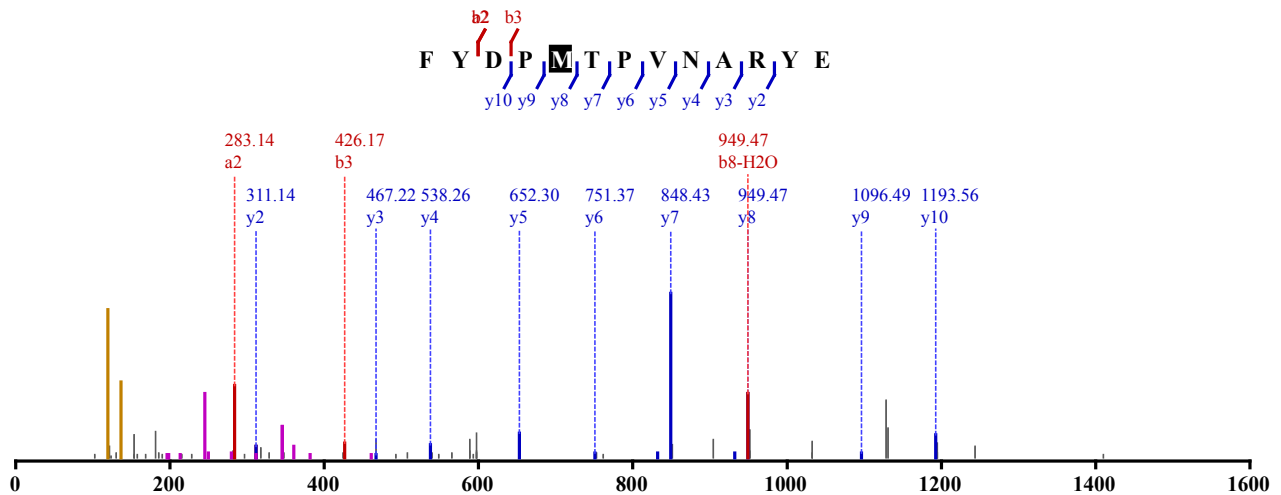

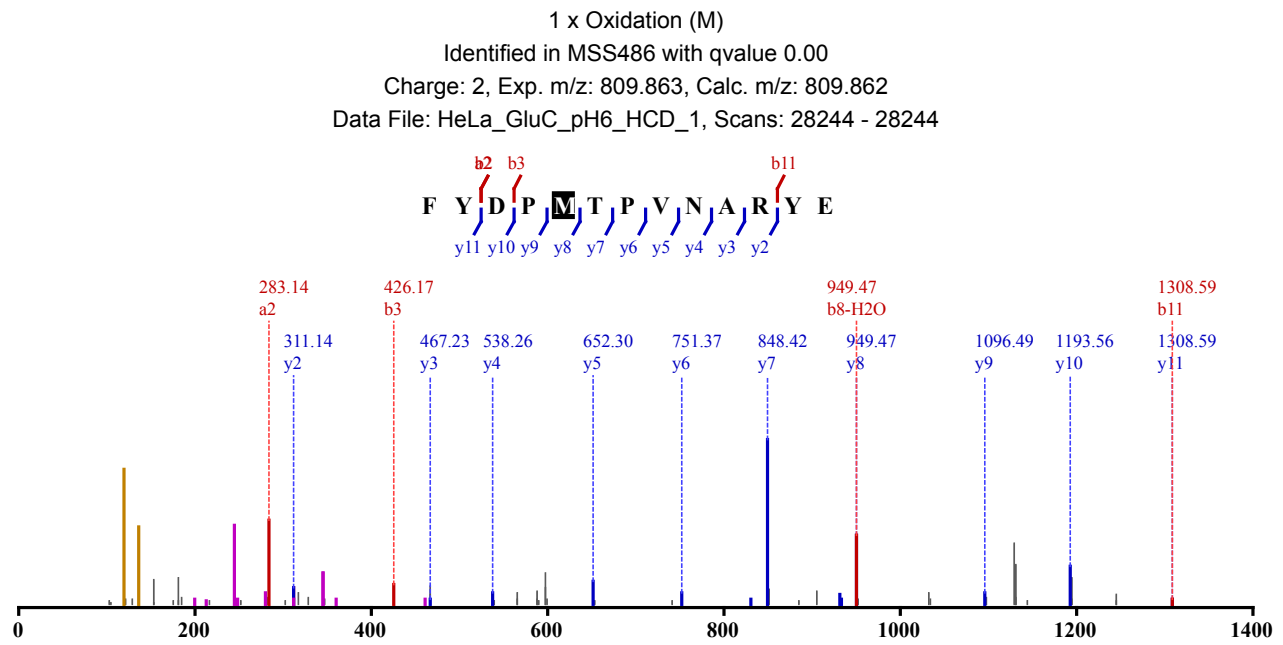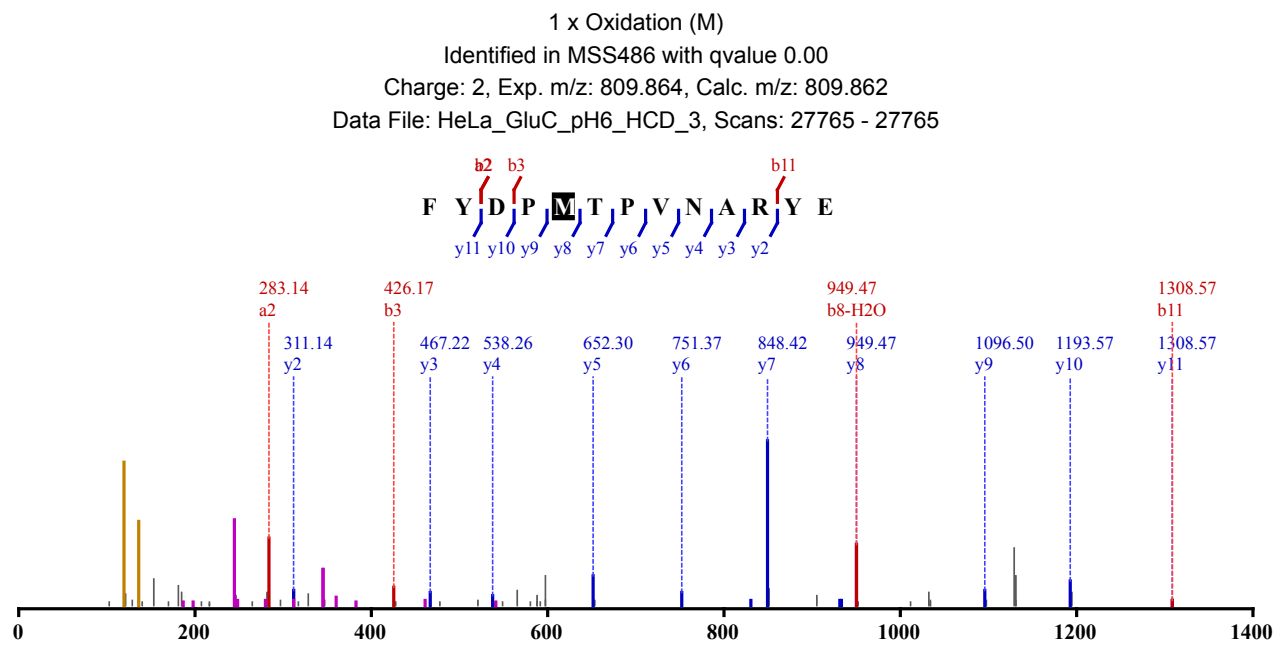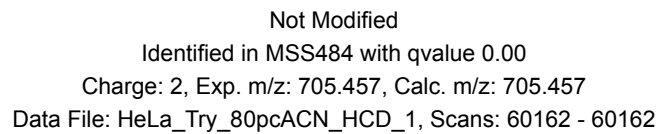

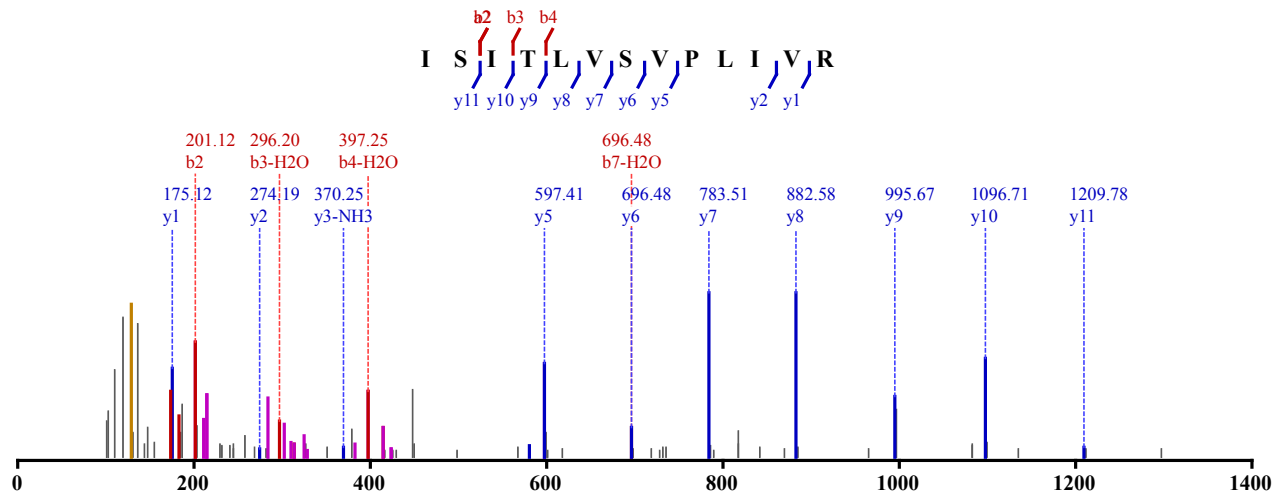

Not Modified

Identified in MSS484 with qvalue 0.00

Charge: 2, Exp. m/z: 705.458, Calc. m/z: 705.457

Data File: HeLa\_Try\_80pcACN\_HCD\_2, Scans: 59730 - 59730

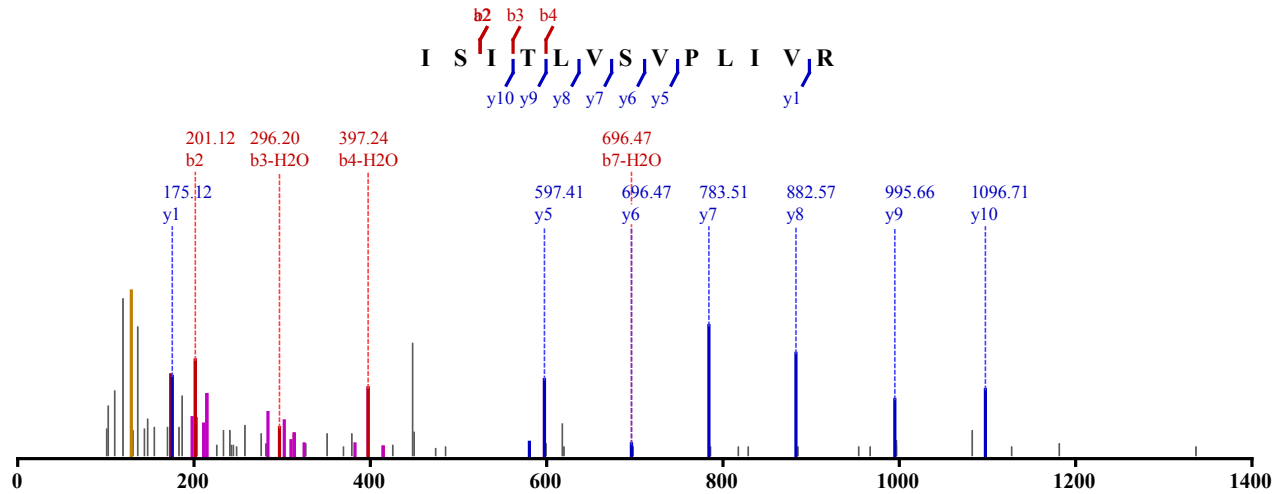

Not Modified

Identified in MSS30 with qvalue 0.00

Charge: 2, Exp. m/z: 572.762, Calc. m/z: 572.757

Data File: 20101224\_Velos1\_TaGe\_SA\_HeLa\_05, Scans: 2445 - 2445

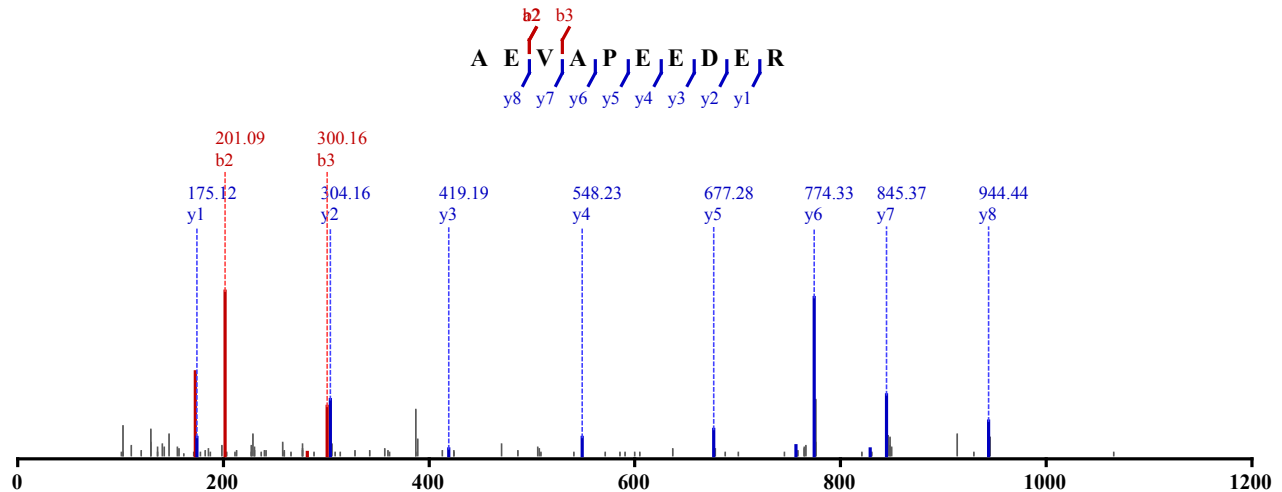

Not Modified

Identified in MSS480 with qvalue 0.00

Charge: 2, Exp. m/z: 572.759, Calc. m/z: 572.762



Data File: HeLa\_try\_pH3\_CID\_3xload\_3, Scans: 7793 - 7793

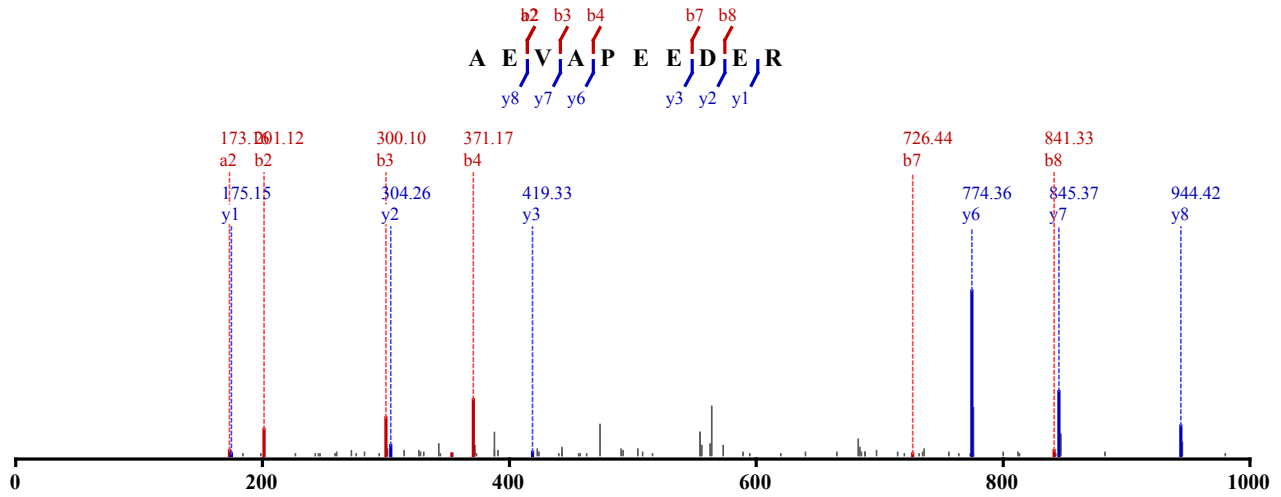

Not Modified

Identified in MSS480 with qvalue 0.00

Charge: 2, Exp. m/z: 572.759, Calc. m/z: 572.762

Data File: HeLa\_try\_pH3\_CID\_3xload\_3, Scans: 7870 - 7870

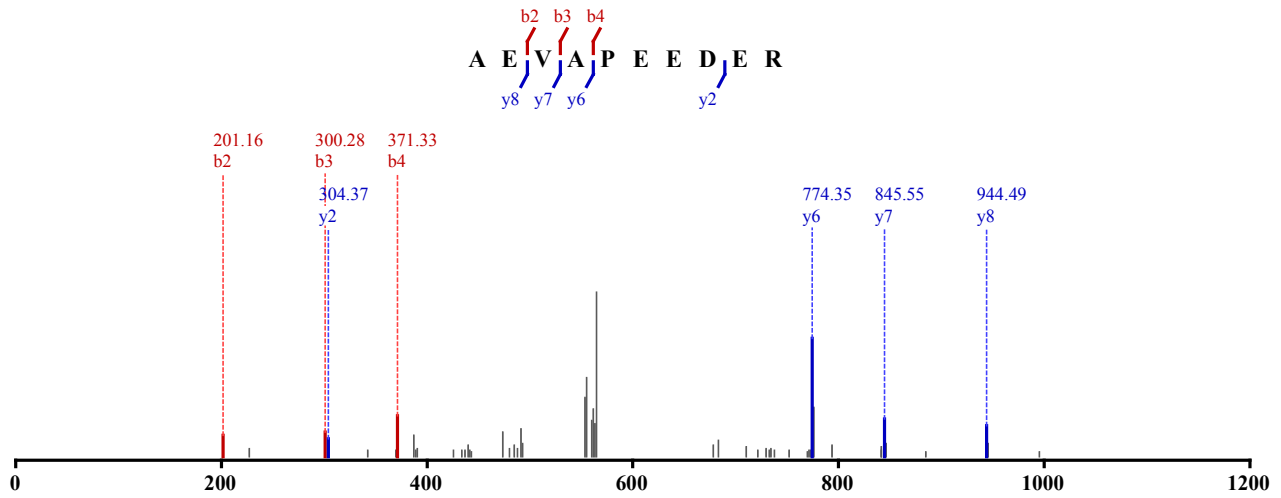

Not Modified

Identified in MSS484 with qvalue 0.00

Charge: 2, Exp. m/z: 572.761, Calc. m/z: 572.757

Data File: HeLa\_Try\_pH4\_HCD\_2, Scans: 13028 - 13028

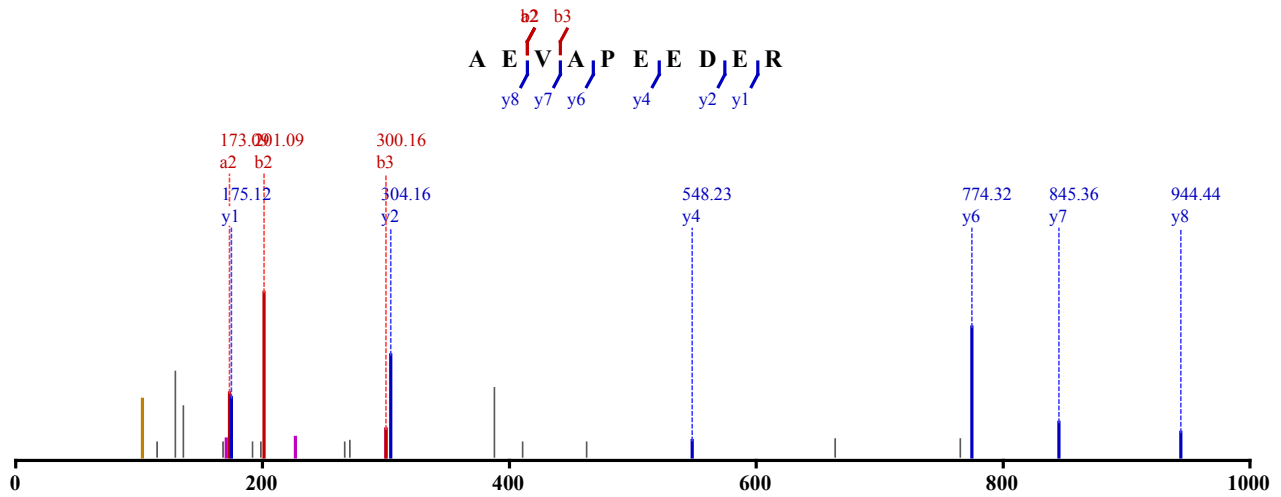

Not Modified

Identified in MSS484 with qvalue 0.00  
 Charge: 2, Exp. m/z: 572.761, Calc. m/z: 572.757  
 Data File: HeLa\_Try\_pH4\_HCD\_3, Scans: 13300 - 13300

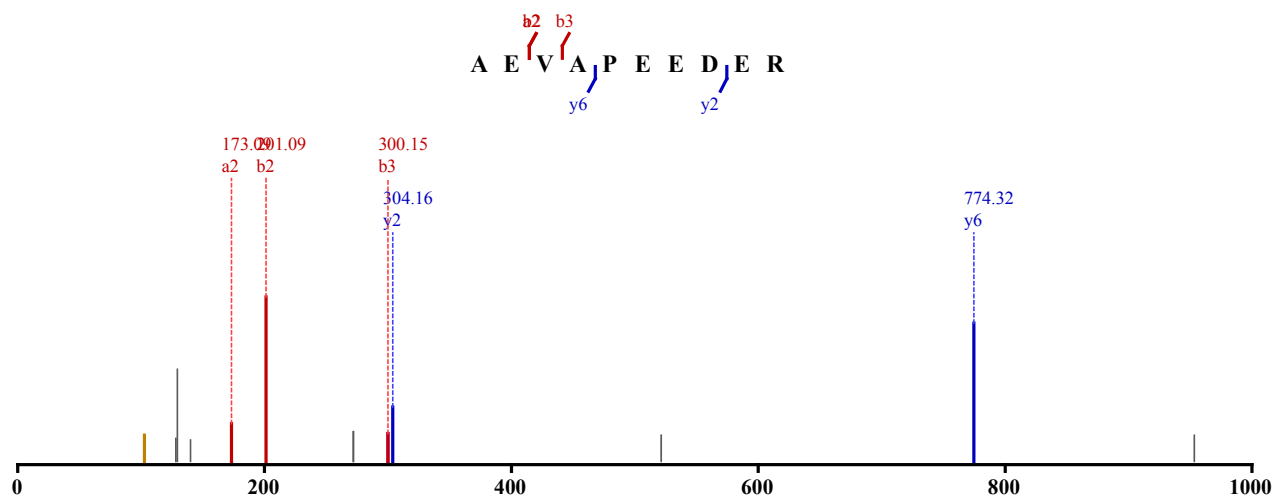

Not Modified  
 Identified in MSS484 with qvalue 0.00  
 Charge: 2, Exp. m/z: 572.760, Calc. m/z: 572.762  
 Data File: HeLa\_Try\_pH3\_HCD\_3, Scans: 13054 - 13054

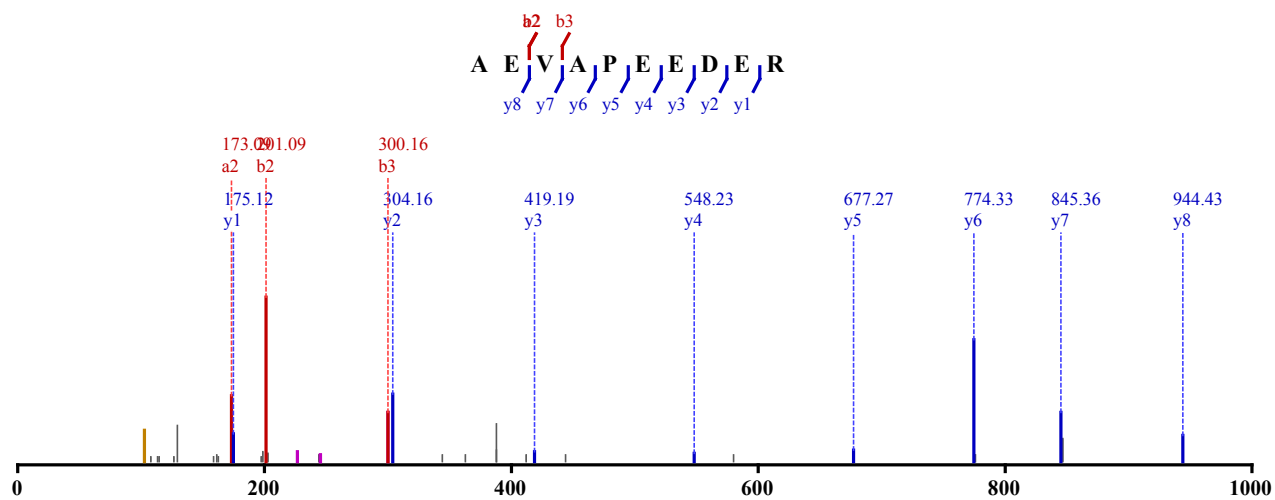

Not Modified  
 Identified in MSS484 with qvalue 0.00  
 Charge: 2, Exp. m/z: 572.759, Calc. m/z: 572.762  
 Data File: HeLa\_Try\_pH4\_HCD\_1, Scans: 16931 - 16931

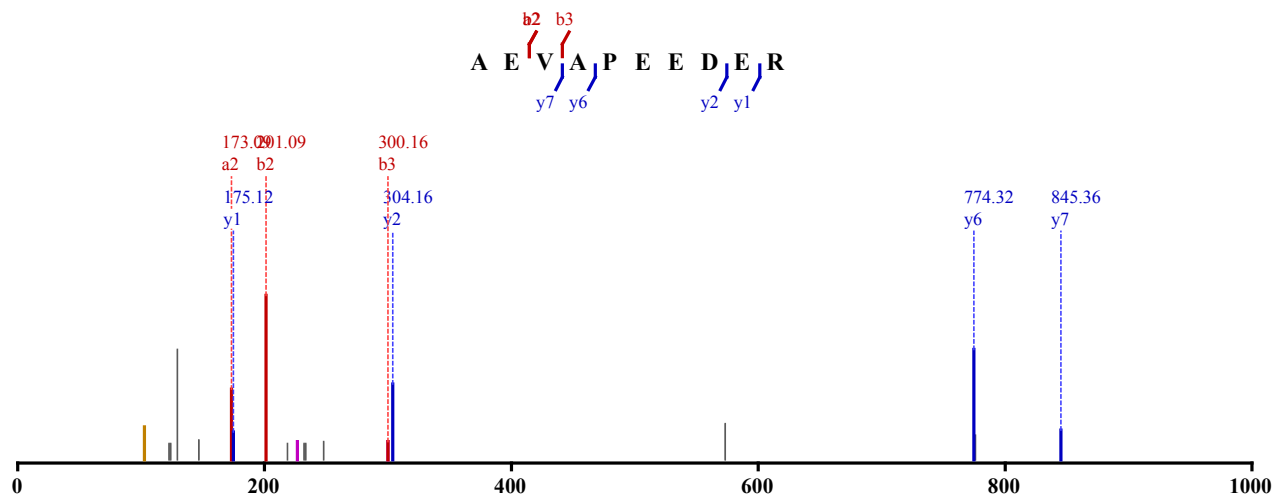

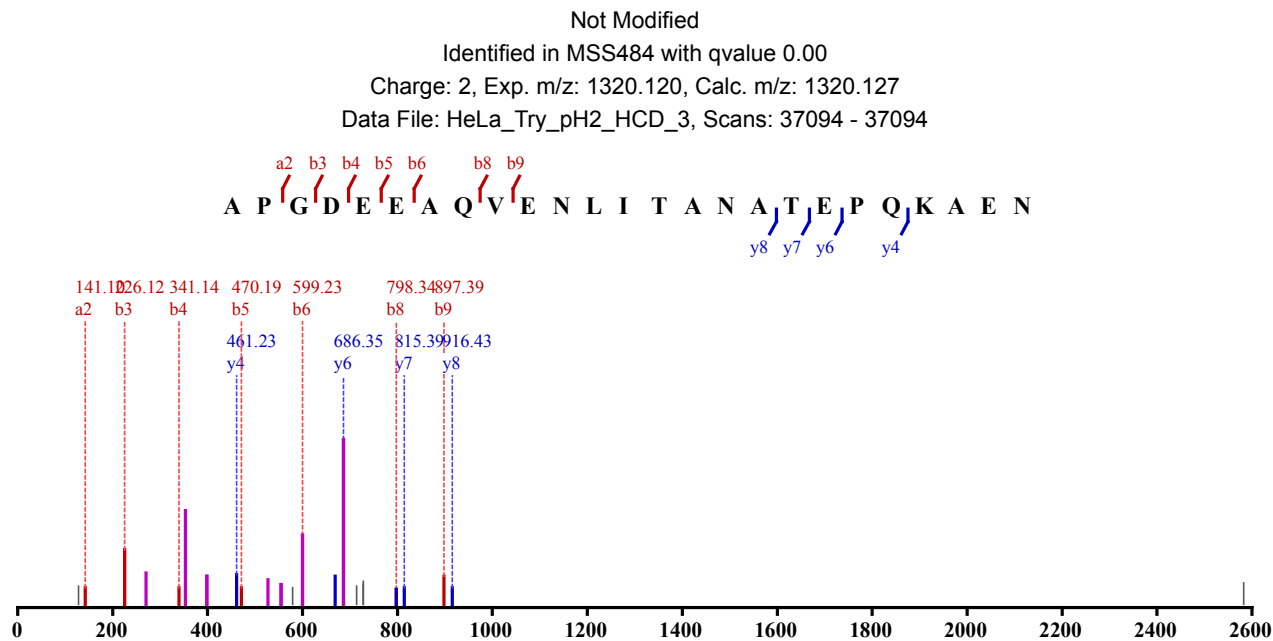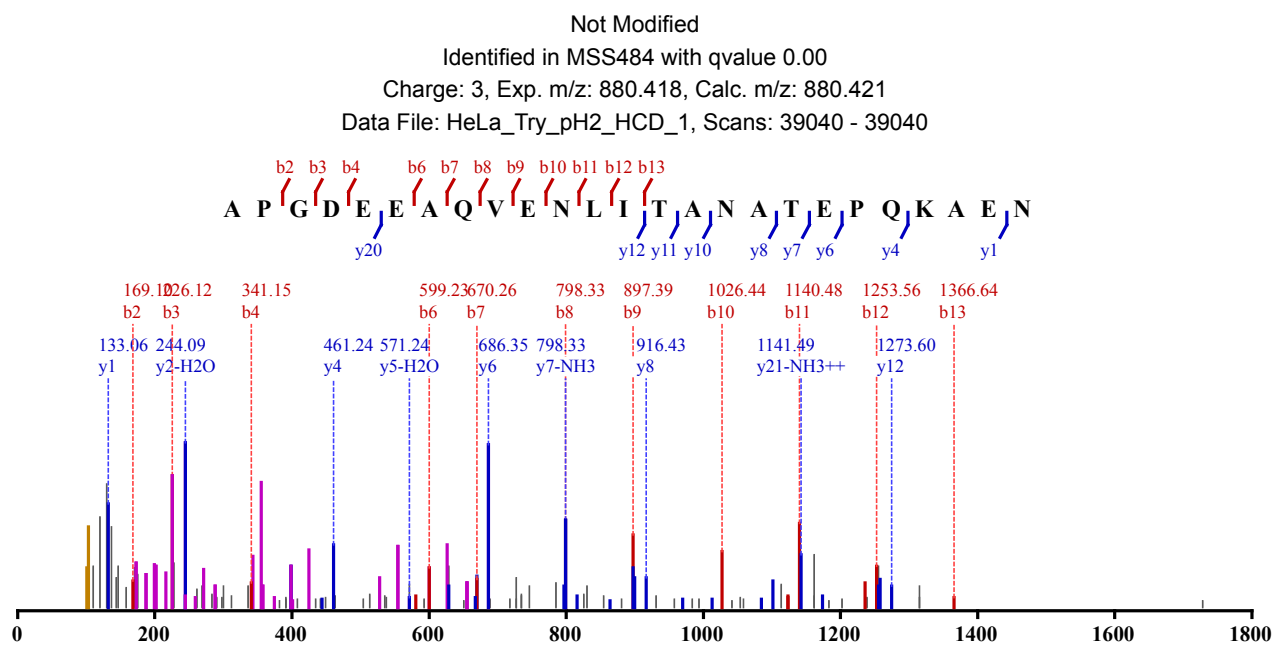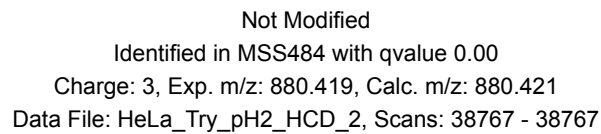

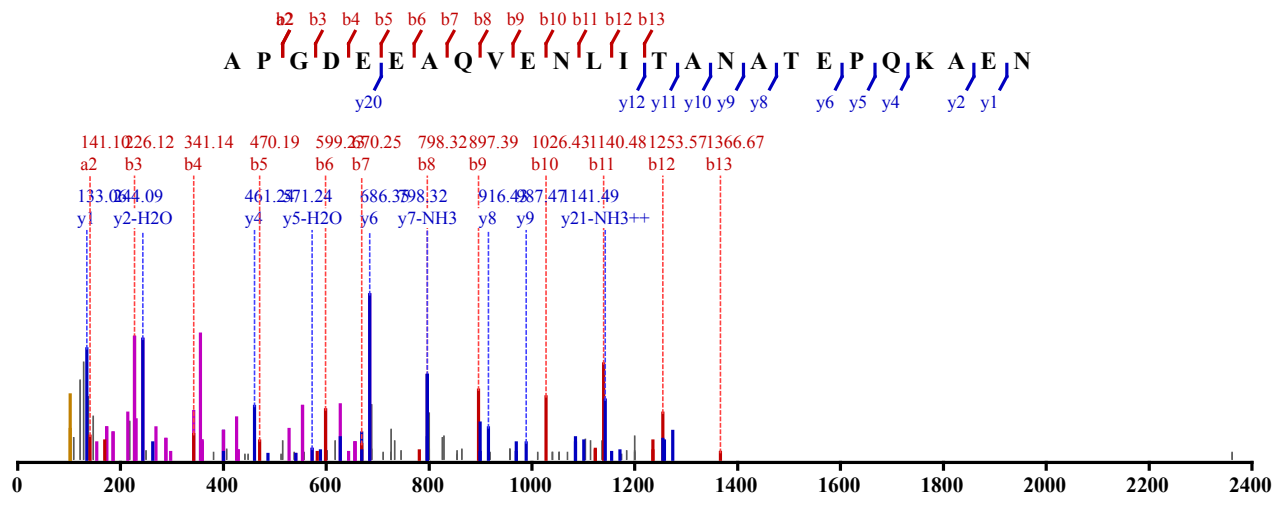

Not Modified  
 Identified in MSS484 with qvalue 0.00  
 Charge: 3, Exp. m/z: 880.419, Calc. m/z: 880.421  
 Data File: HeLa\_Try\_pH2\_HCD\_3, Scans: 37098 - 37098

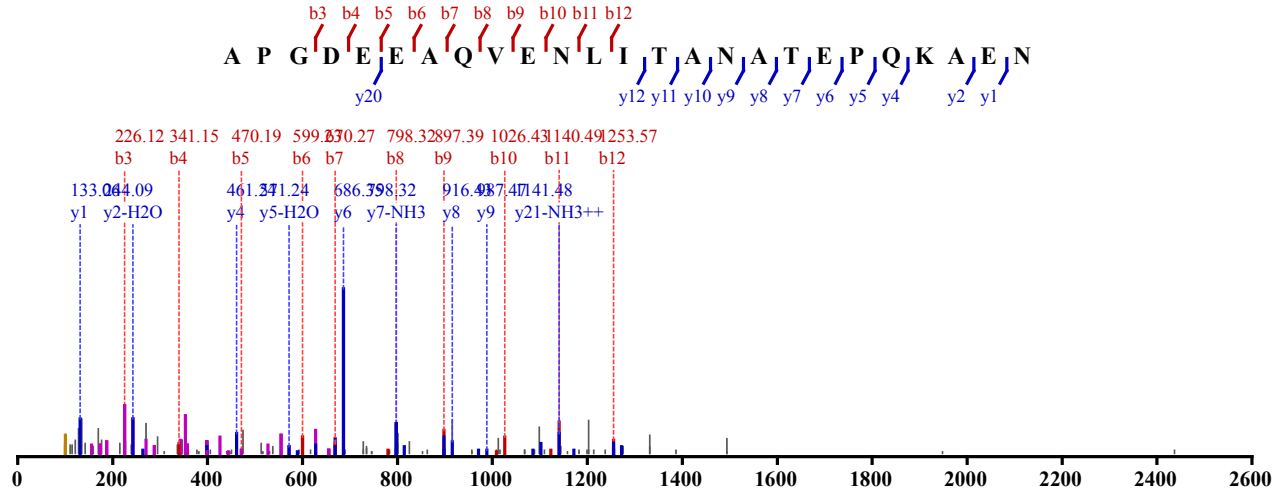

Not Modified  
 Identified in MSS483 with qvalue 0.00  
 Charge: 2, Exp. m/z: 841.933, Calc. m/z: 841.932  
 Data File: HeLa\_AspN\_pH8\_CID\_3xload\_2, Scans: 28688 - 28688

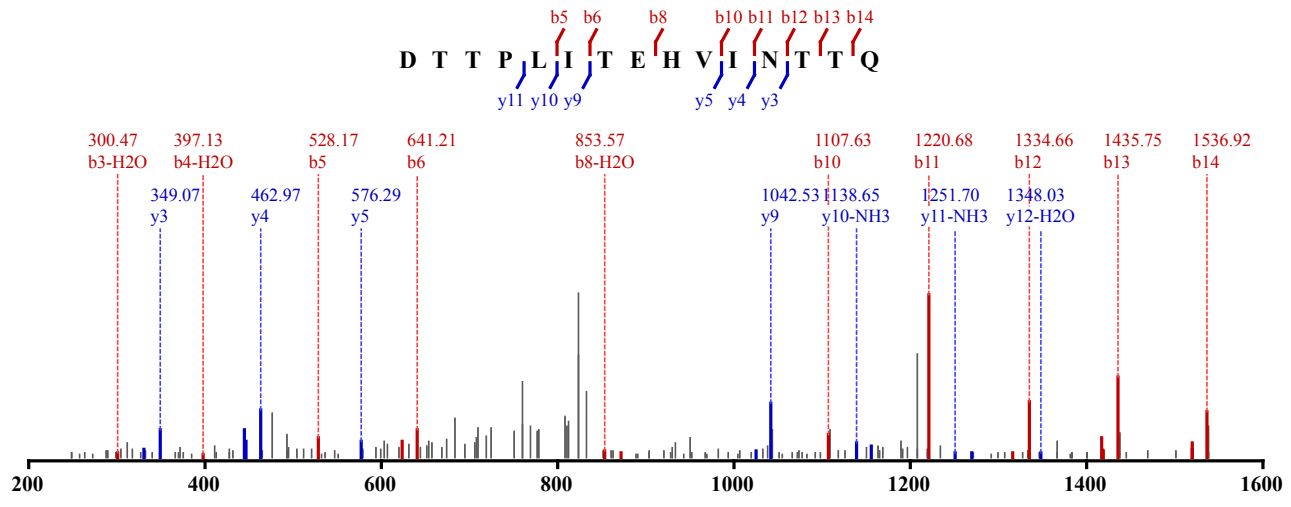

Not Modified  
 Identified in MSS483 with qvalue 0.00  
 Charge: 2, Exp. m/z: 841.934, Calc. m/z: 841.932

Data File: HeLa\_AspN\_pH8\_CID\_3xload, Scans: 29019 - 29019

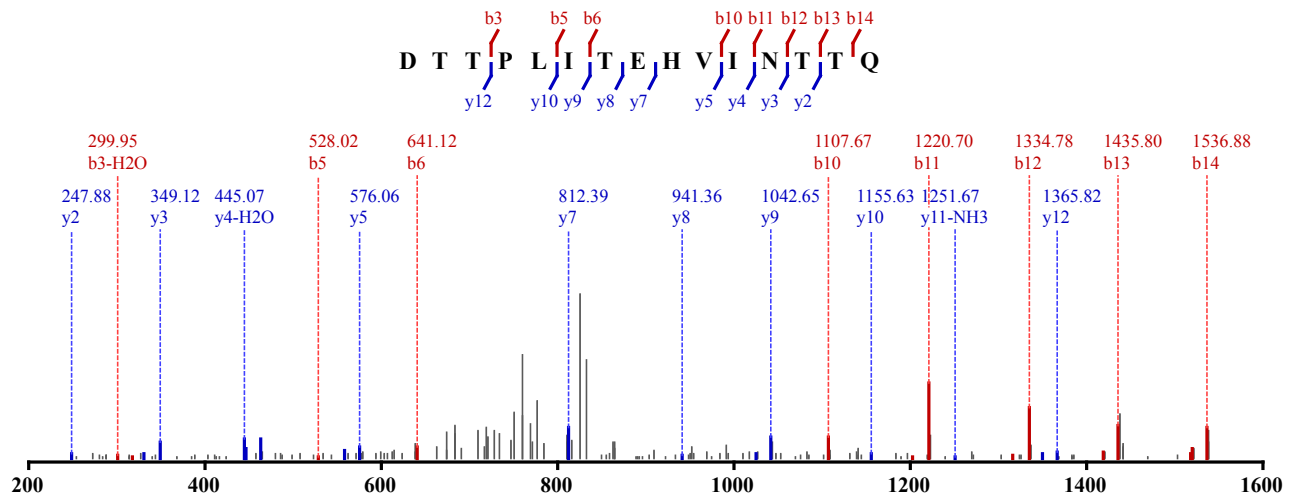

Not Modified

Identified in MSS479 with qvalue 0.00

Charge: 5, Exp. m/z: 548.876, Calc. m/z: 548.877

Data File: HeLa\_AspN\_pH6\_HCD\_1, Scans: 13162 - 13162

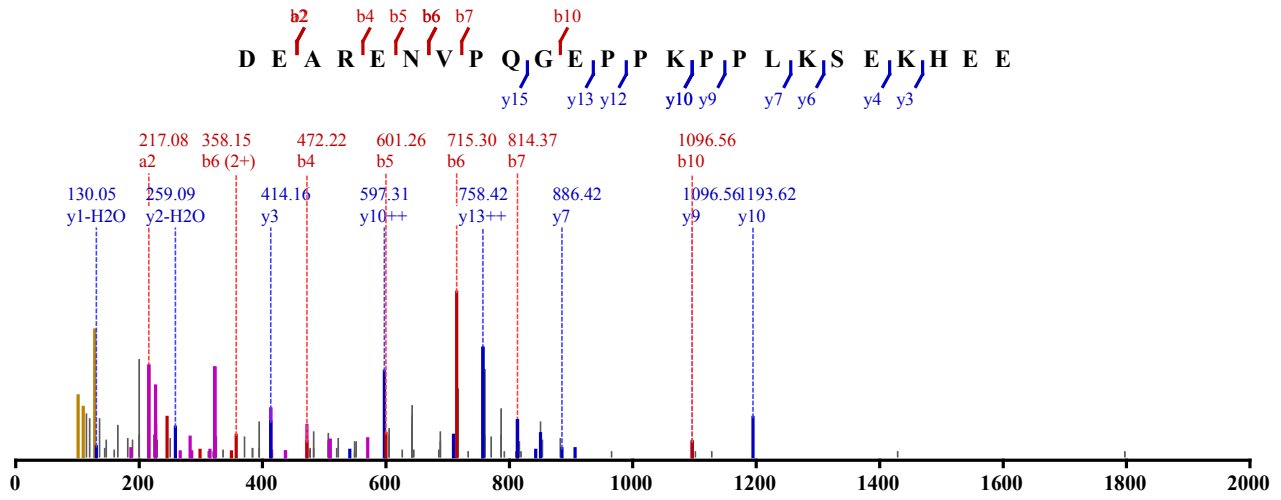

Not Modified

Identified in MSS479 with qvalue 0.00

Charge: 5, Exp. m/z: 548.878, Calc. m/z: 548.877

Data File: HeLa\_AspN\_pH8\_HCD\_1, Scans: 14170 - 14170

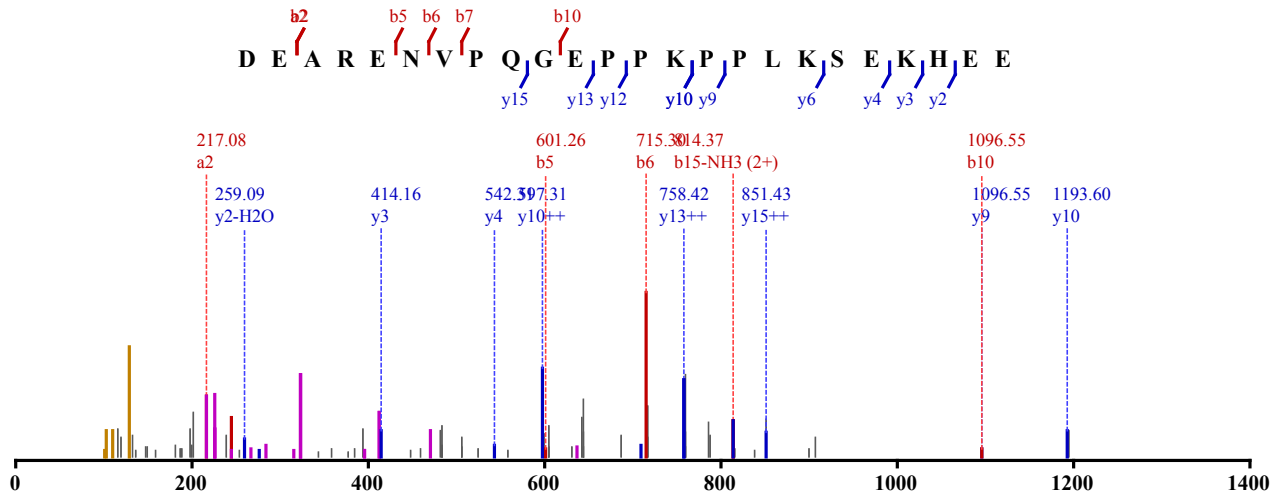

Not Modified

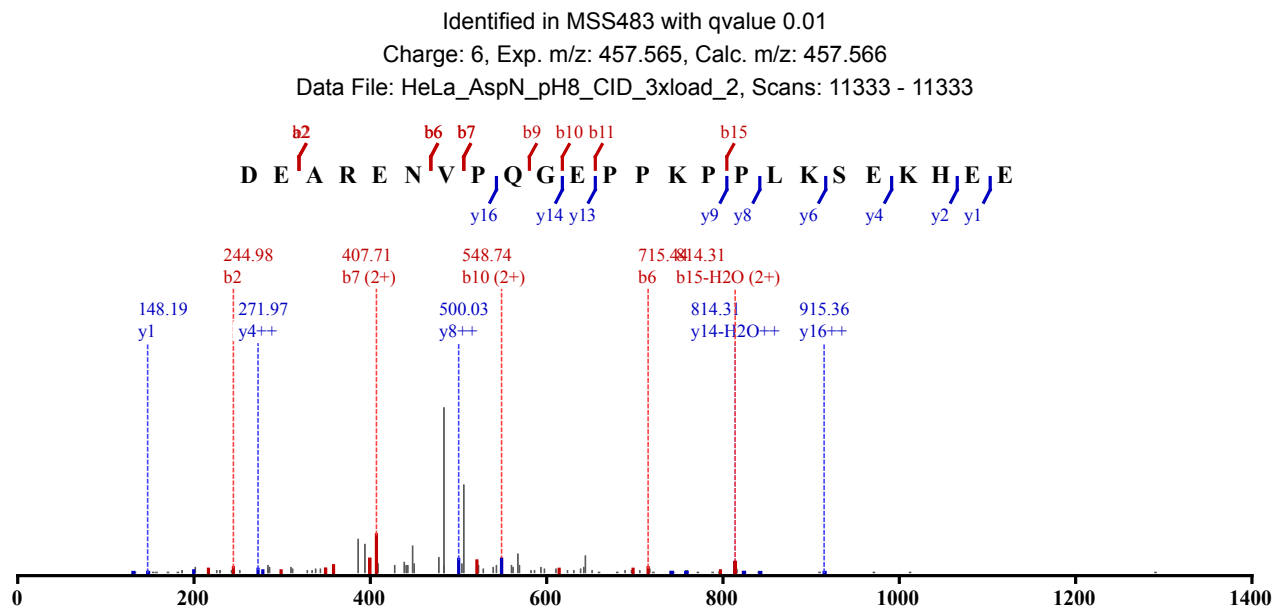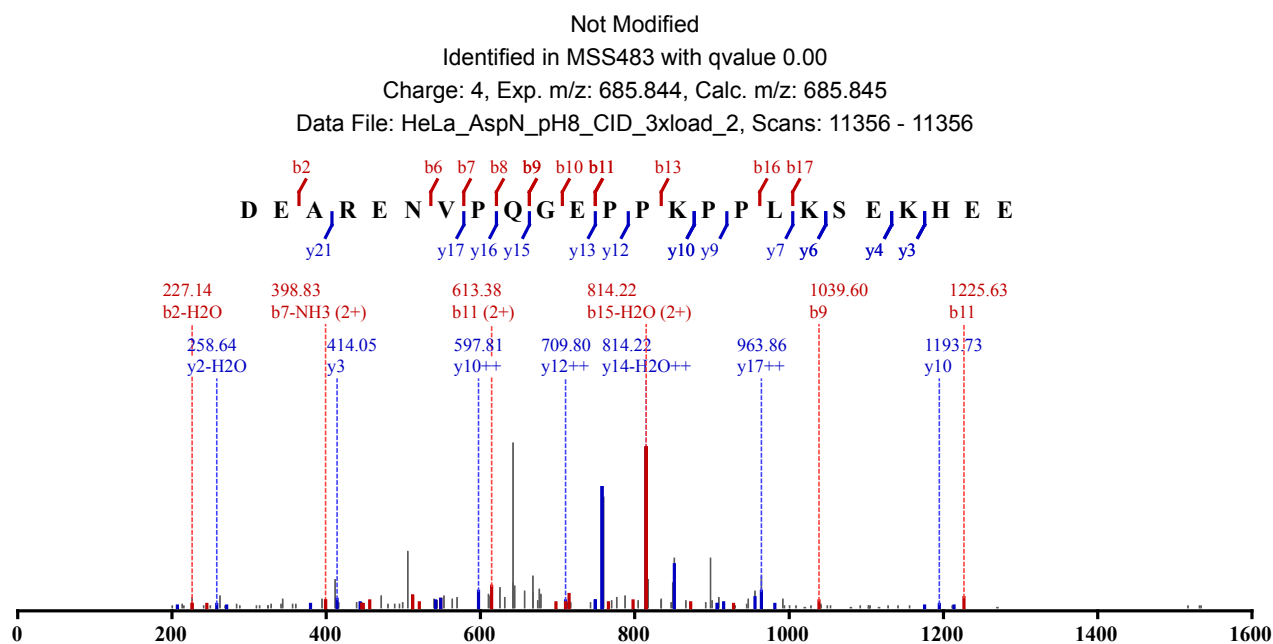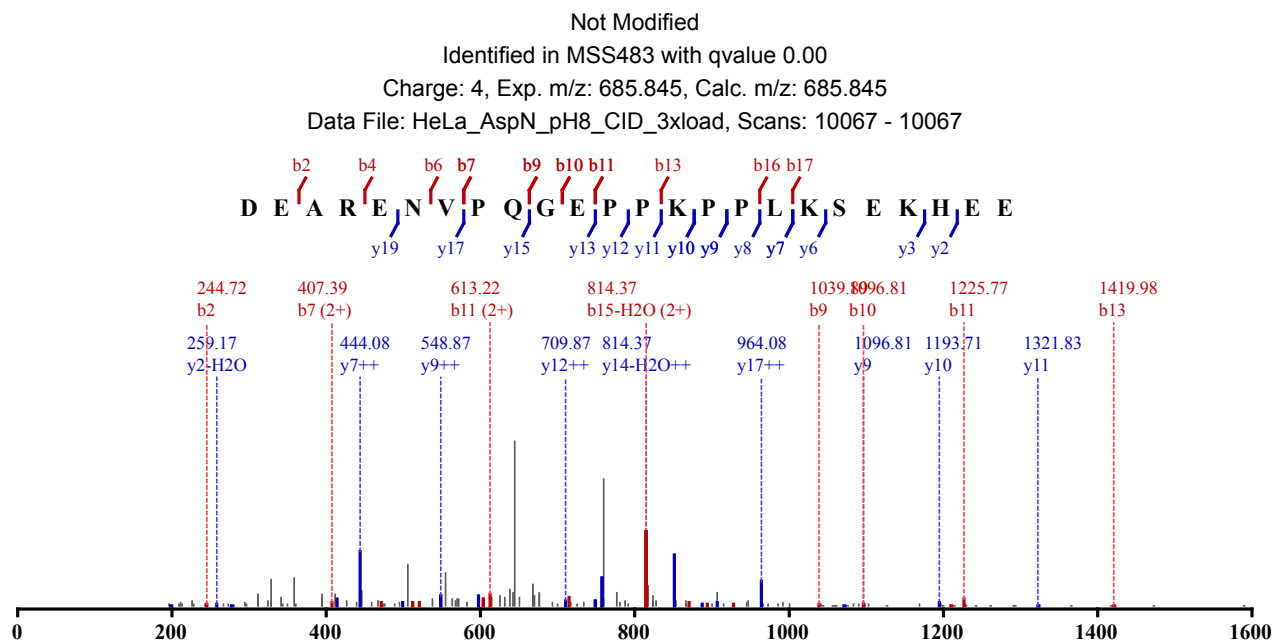

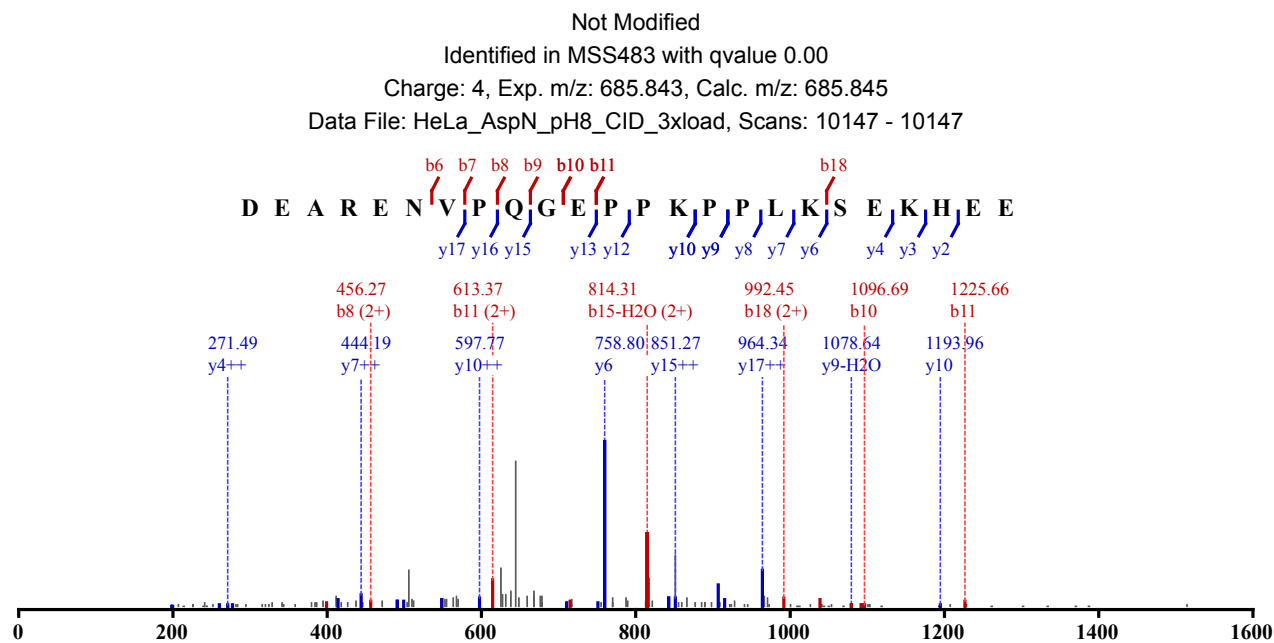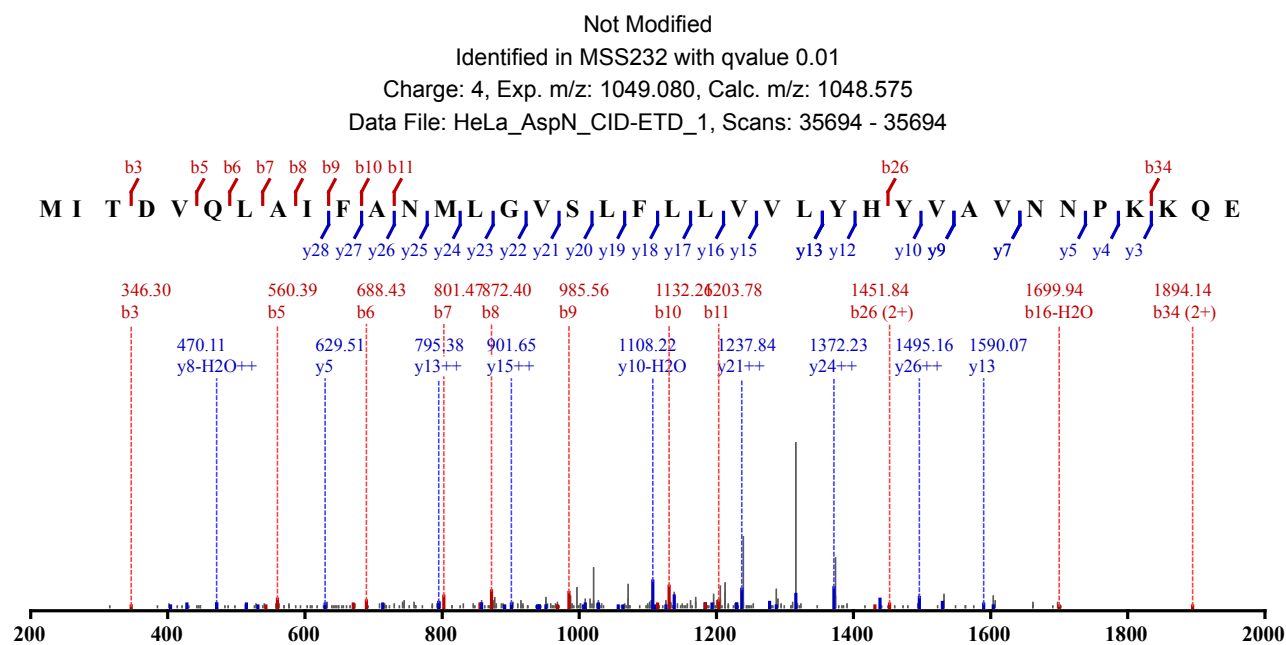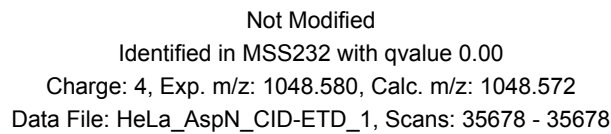

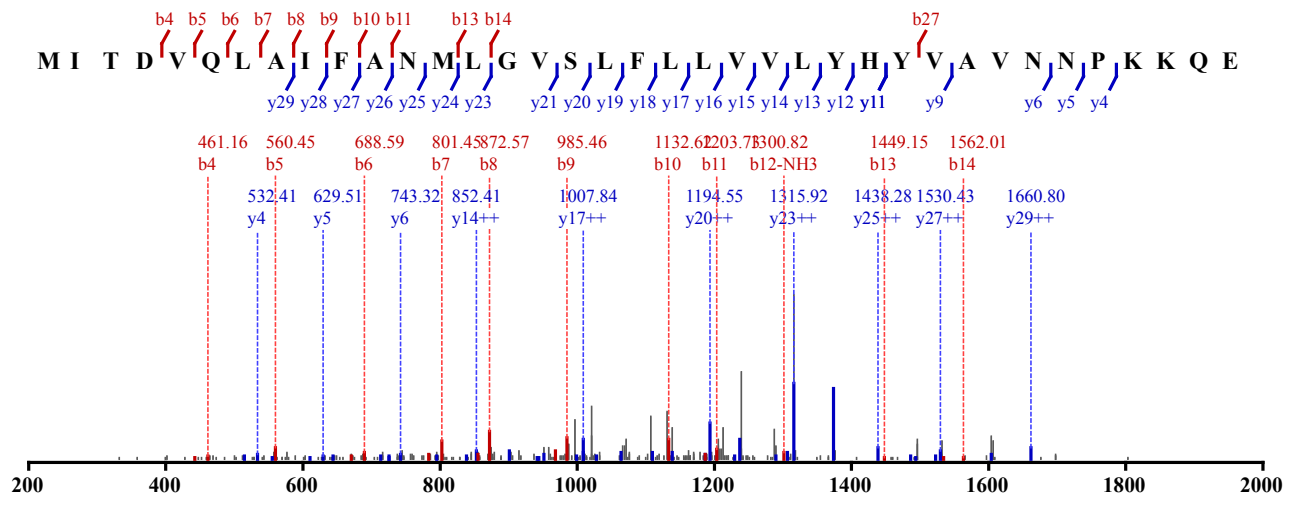

Not Modified  
 Identified in MSS232 with qvalue 0.00  
 Charge: 4, Exp. m/z: 1048.830, Calc. m/z: 1048.572  
 Data File: HeLa\_AspN\_CID-ETD\_1, Scans: 35704 - 35704

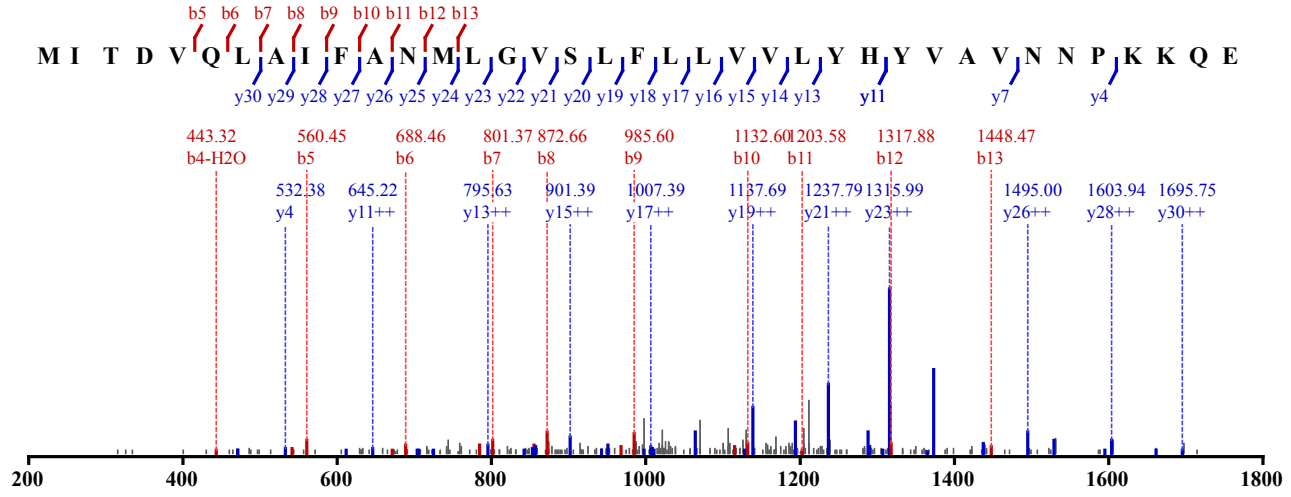

2 x Oxidation (M)  
 Identified in MSS482 with qvalue 0.00  
 Charge: 4, Exp. m/z: 1056.820, Calc. m/z: 1056.570  
 Data File: HeLa\_GluC\_80pcACN\_CID\_3xload\_2, Scans: 55703 - 55703

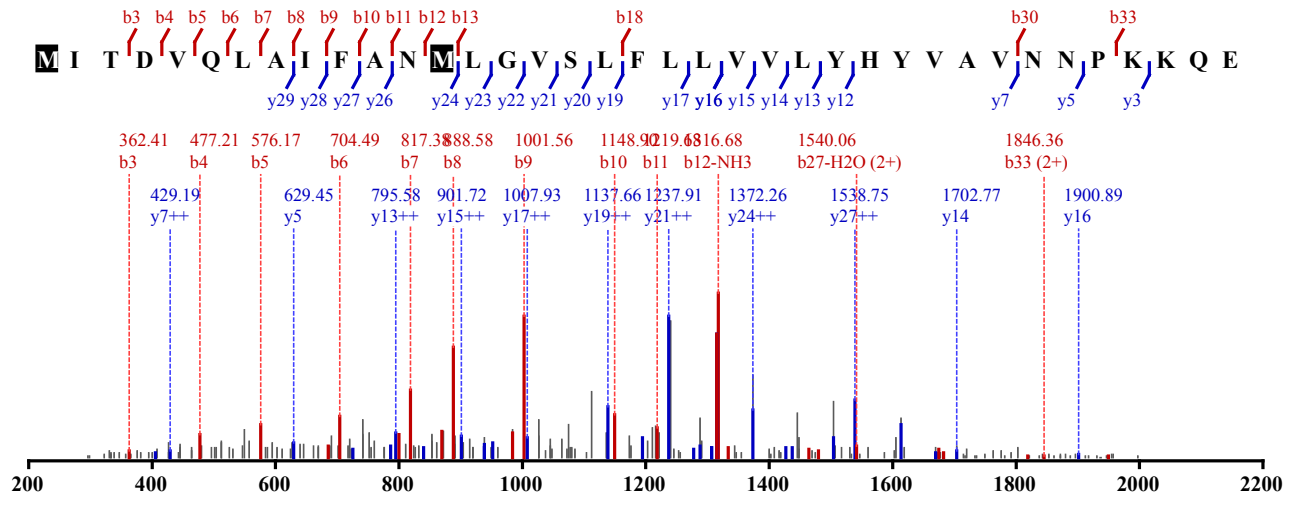

2 x Oxidation (M)  
 Identified in MSS482 with qvalue 0.00  
 Charge: 4, Exp. m/z: 1056.570, Calc. m/z: 1056.570



Data File: HeLa\_GluC\_80pcACN\_CID\_3xload\_3, Scans: 53453 - 53453

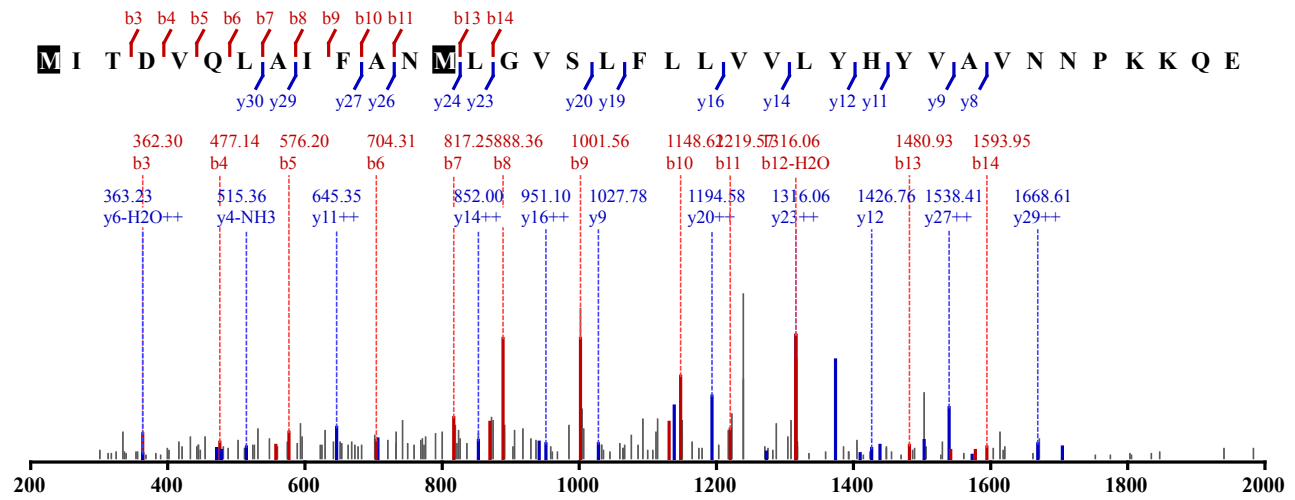

2 x Oxidation (M)

Identified in MSS482 with qvalue 0.00

Charge: 4, Exp. m/z: 1056.820, Calc. m/z: 1056.570

Data File: HeLa\_GluC\_80pcACN\_CID\_3xload, Scans: 52236 - 52236

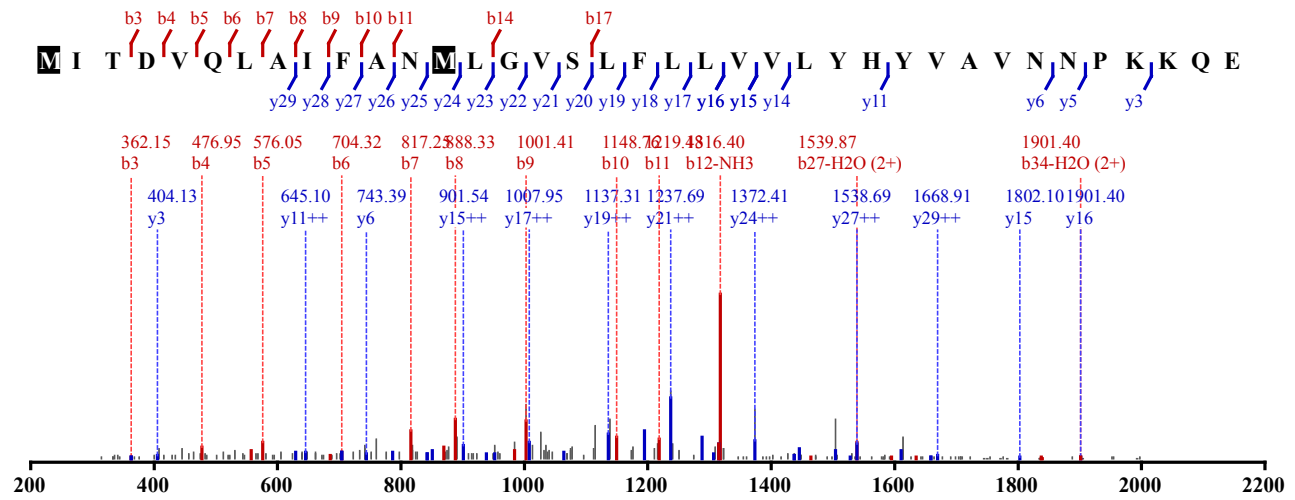

2 x Oxidation (M)

Identified in MSS482 with qvalue 0.00

Charge: 4, Exp. m/z: 1057.080, Calc. m/z: 1056.570

Data File: HeLa\_GluC\_80pcACN\_CID\_3xload, Scans: 52279 - 52279

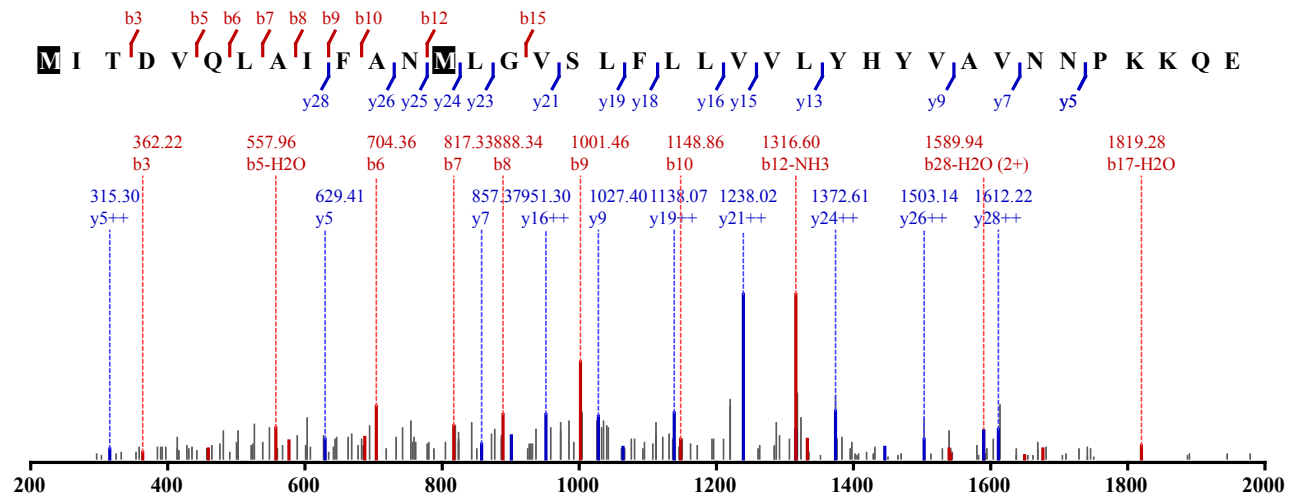

2 x Oxidation (M)

Identified in MSS486 with qvalue 0.00  
 Charge: 4, Exp. m/z: 1056.570, Calc. m/z: 1056.572  
 Data File: HeLa\_GluC\_pH8\_HCD\_1, Scans: 54862 - 54862

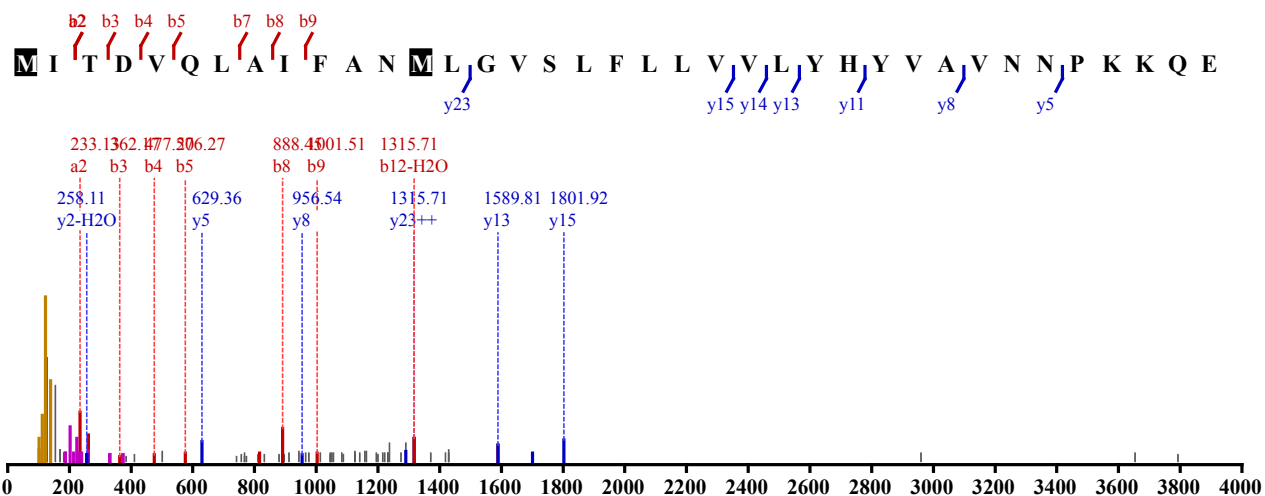

1 x Carbamidomethyl (C)  
 Identified in MSS135 with qvalue 0.00  
 Charge: 3, Exp. m/z: 792.440, Calc. m/z: 792.444  
 Data File: HeLa\_GluC-LysC\_HCD\_2, Scans: 56840 - 56840

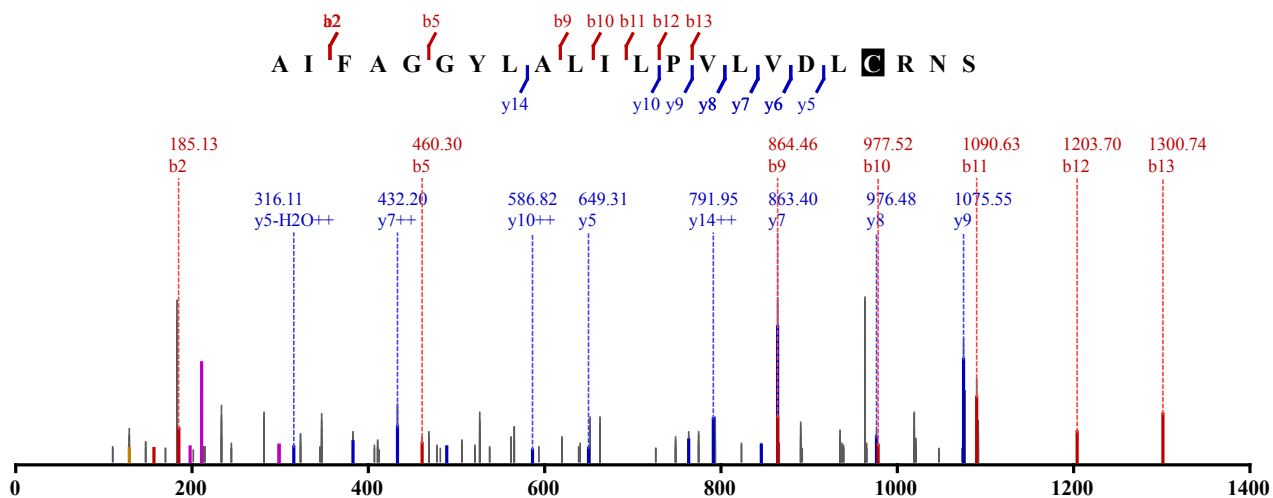

1 x Carbamidomethyl (C)  
 Identified in MSS135 with qvalue 0.00  
 Charge: 3, Exp. m/z: 792.440, Calc. m/z: 792.444  
 Data File: HeLa\_GluC-LysC\_HCD\_3, Scans: 52418 - 52418

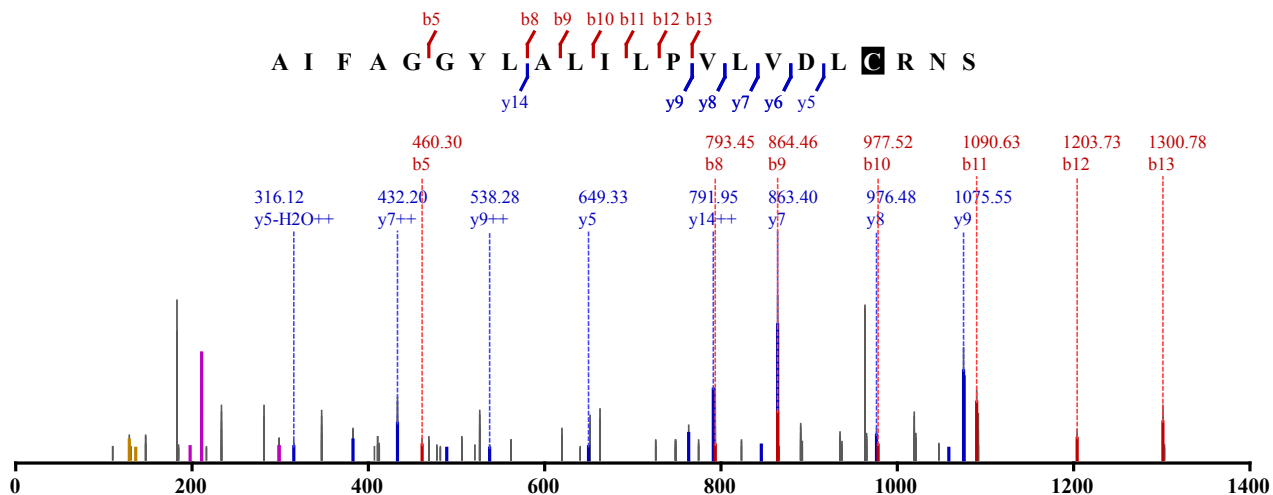

1 x Carbamidomethyl (C)

Identified in MSS134 with qvalue 0.01

Charge: 3, Exp. m/z: 792.440, Calc. m/z: 792.444

Data File: HeLa\_GluC-try\_HCD\_3, Scans: 58261 - 58261

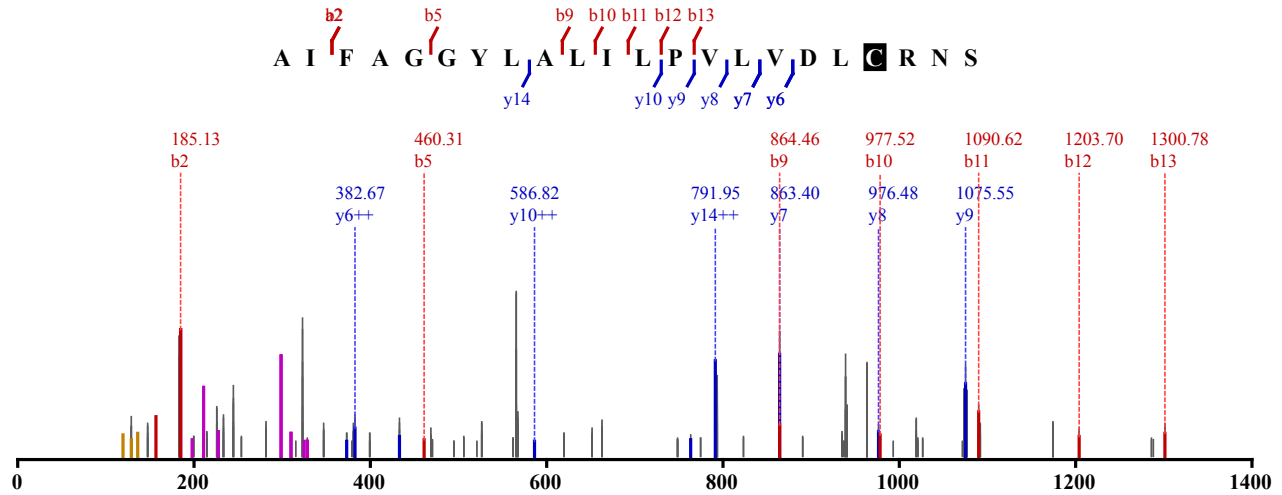

1 x Carbamidomethyl (C)

Identified in MSS512 with qvalue 0.00

Charge: 3, Exp. m/z: 792.441, Calc. m/z: 792.444

Data File: HeLa\_LysC-chytry\_HCD\_2, Scans: 58119 - 58119

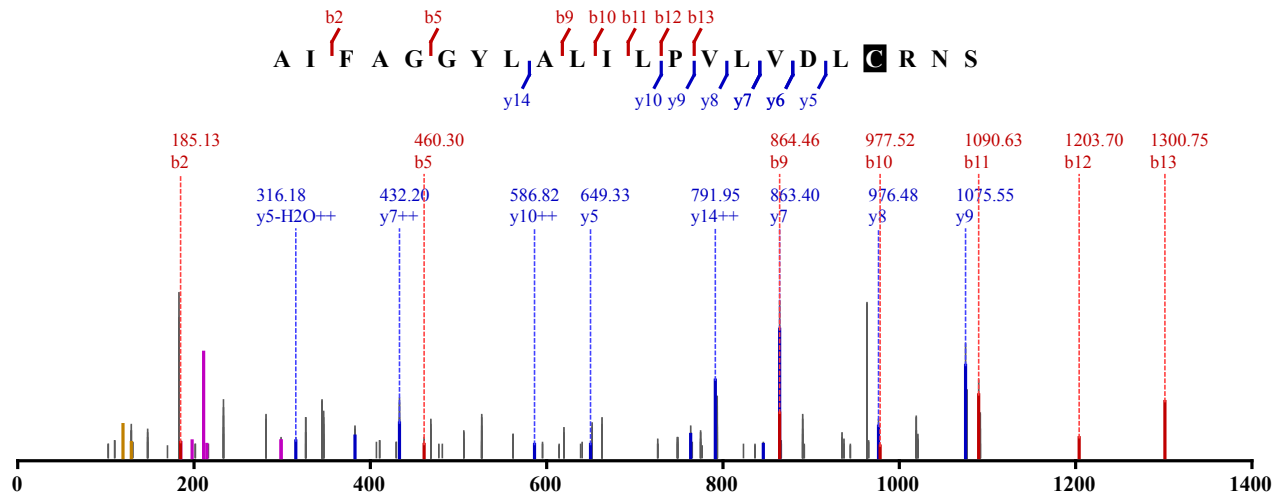

1 x Carbamidomethyl (C)

Identified in MSS512 with qvalue 0.01

Charge: 3, Exp. m/z: 792.441, Calc. m/z: 792.444

Data File: HeLa\_LysC-chytry\_HCD\_3, Scans: 54395 - 54395

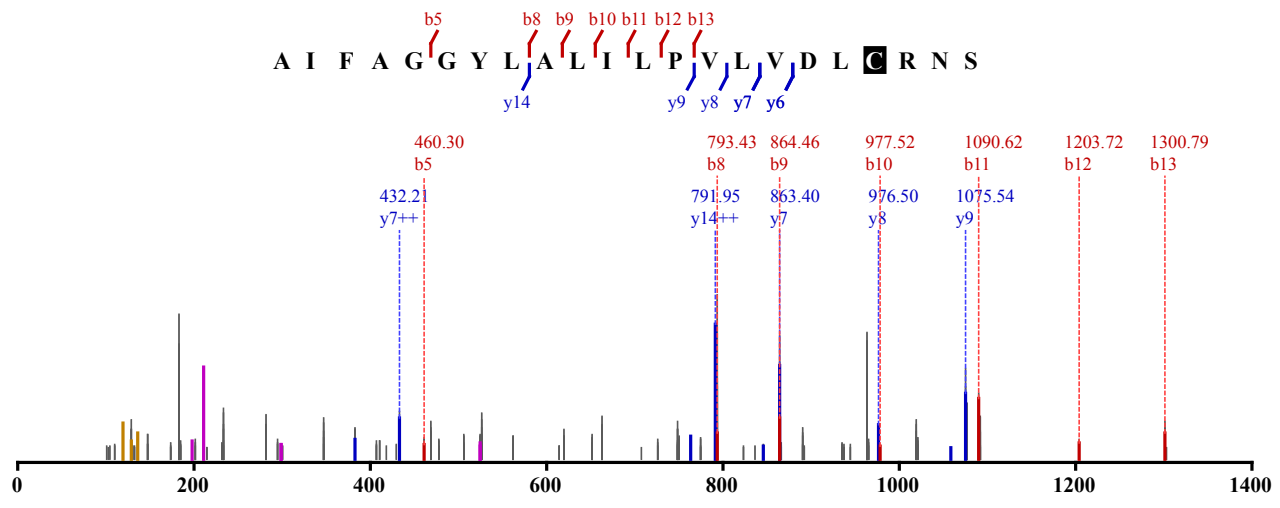

1 x Carbamidomethyl (C)  
 Identified in MSS512 with qvalue 0.00  
 Charge: 3, Exp. m/z: 792.441, Calc. m/z: 792.444  
 Data File: HeLa\_LysC-chytry\_HCD\_3, Scans: 54466 - 54466

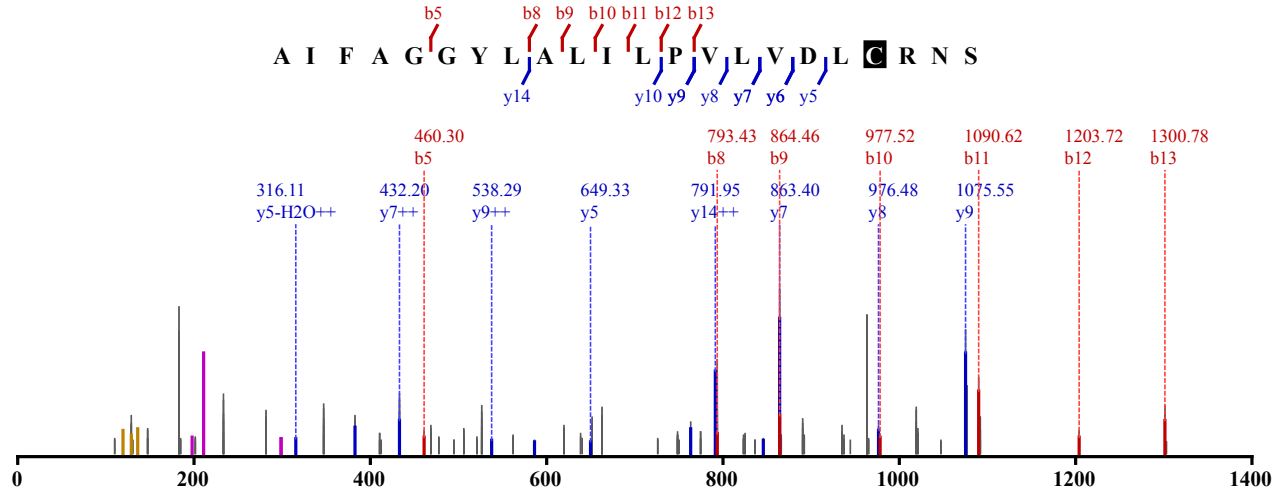

Not Modified  
 Identified in MSS484 with qvalue 0.00  
 Charge: 4, Exp. m/z: 735.114, Calc. m/z: 735.115  
 Data File: HeLa\_Try\_pH5\_HCD\_3, Scans: 27895 - 27895

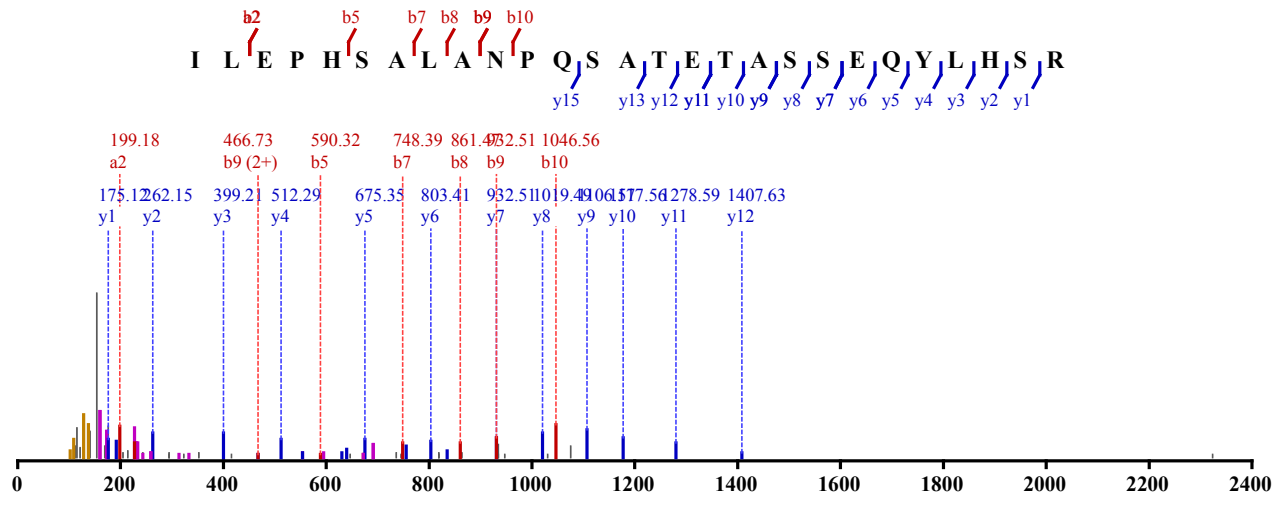

Not Modified  
 Identified in MSS484 with qvalue 0.00  
 Charge: 2, Exp. m/z: 770.850, Calc. m/z: 770.352

Data File: HeLa\_Try\_pH3\_HCD\_3, Scans: 26113 - 26113

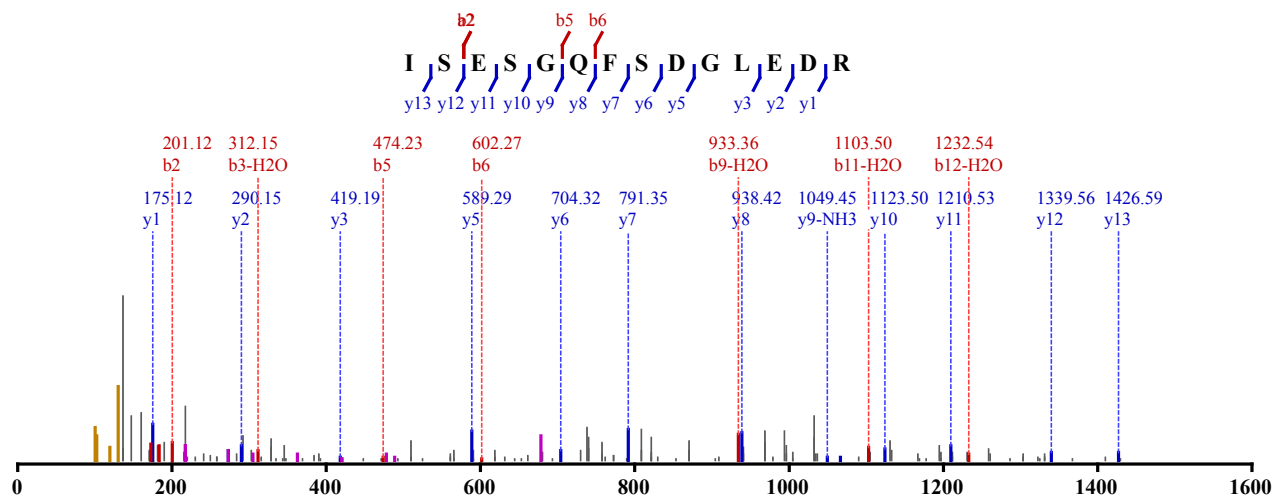

Not Modified

Identified in MSS479 with qvalue 0.00

Charge: 3, Exp. m/z: 453.908, Calc. m/z: 453.911

Data File: HeLa\_AspN\_pH6\_HCD\_3, Scans: 19236 - 19236

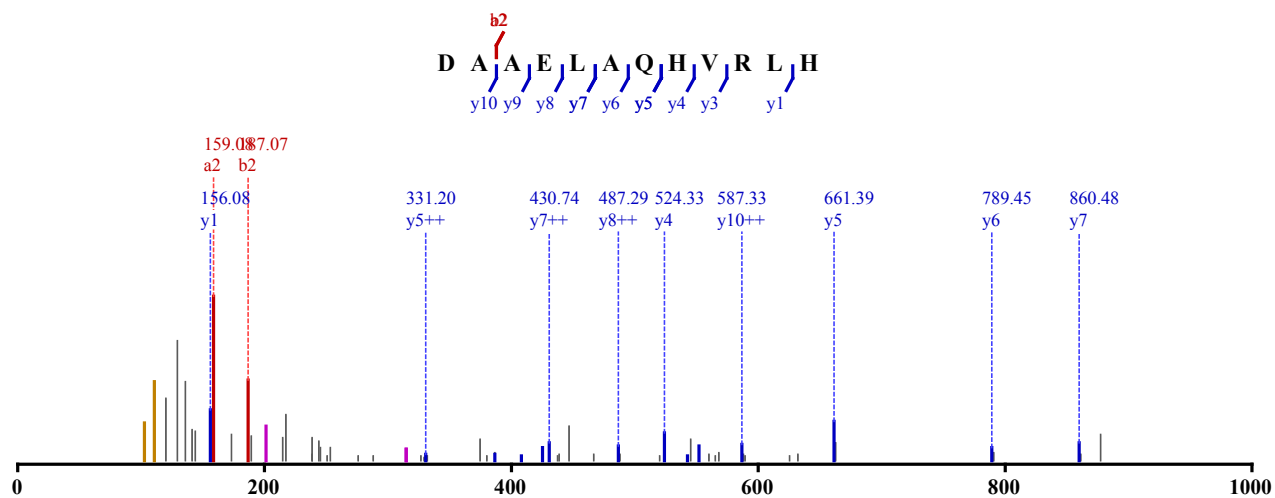

Not Modified

Identified in MSS479 with qvalue 0.00

Charge: 3, Exp. m/z: 453.909, Calc. m/z: 453.911

Data File: HeLa\_AspN\_pH8\_HCD\_3, Scans: 20296 - 20296

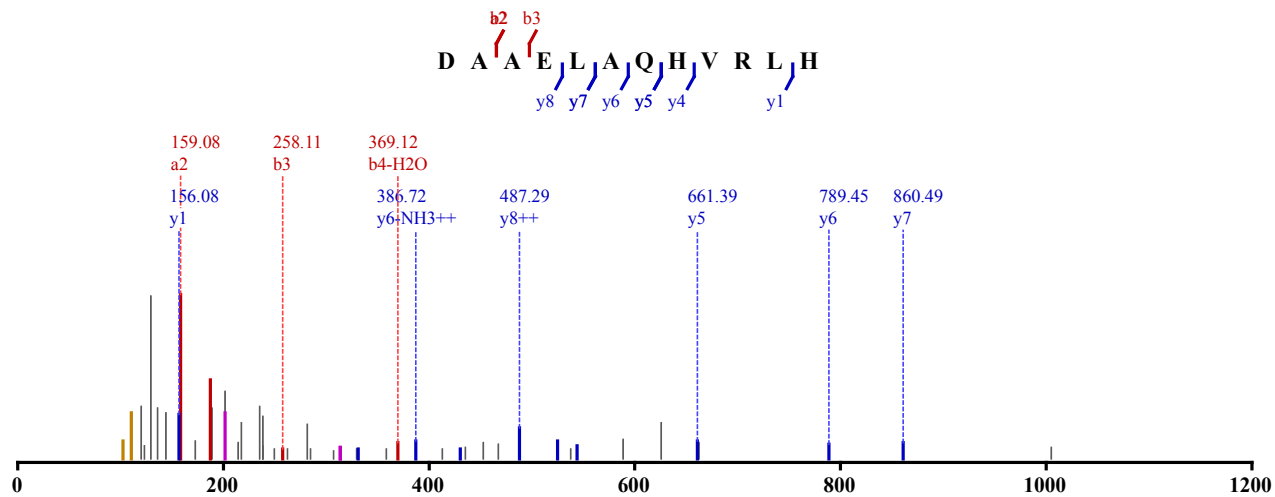

Not Modified

Identified in MSS479 with qvalue 0.00  
 Charge: 3, Exp. m/z: 453.909, Calc. m/z: 453.911  
 Data File: HeLa\_AspN\_pH8\_HCD\_1, Scans: 21635 - 21635

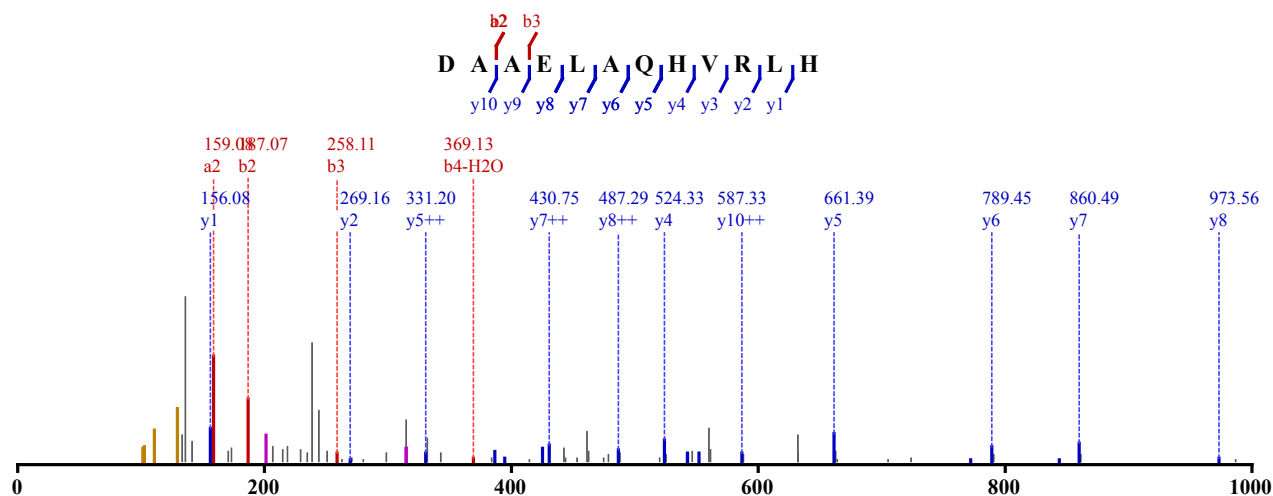

Not Modified  
 Identified in MSS479 with qvalue 0.00  
 Charge: 3, Exp. m/z: 453.909, Calc. m/z: 453.911  
 Data File: HeLa\_AspN\_pH8\_HCD\_2, Scans: 20792 - 20792

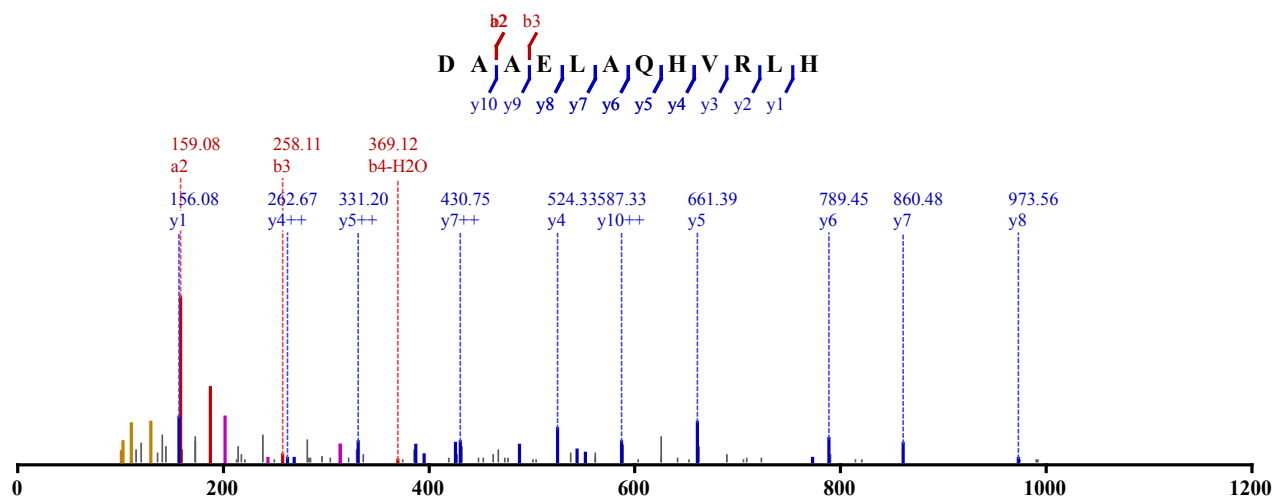

Not Modified  
 Identified in MSS479 with qvalue 0.00  
 Charge: 3, Exp. m/z: 453.909, Calc. m/z: 453.911  
 Data File: HeLa\_AspN\_pH8\_HCD\_3, Scans: 20206 - 20206

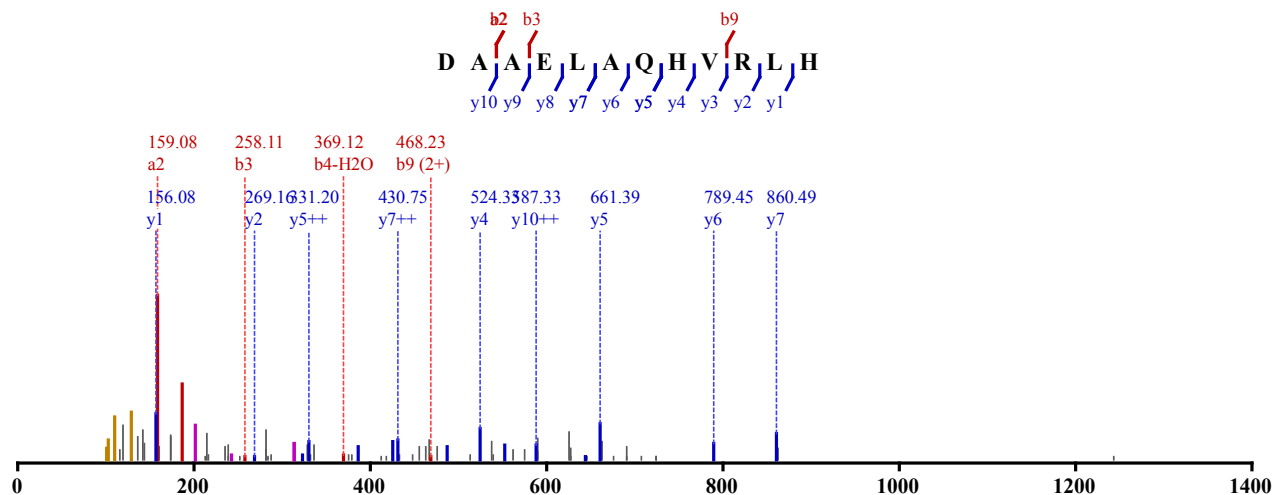



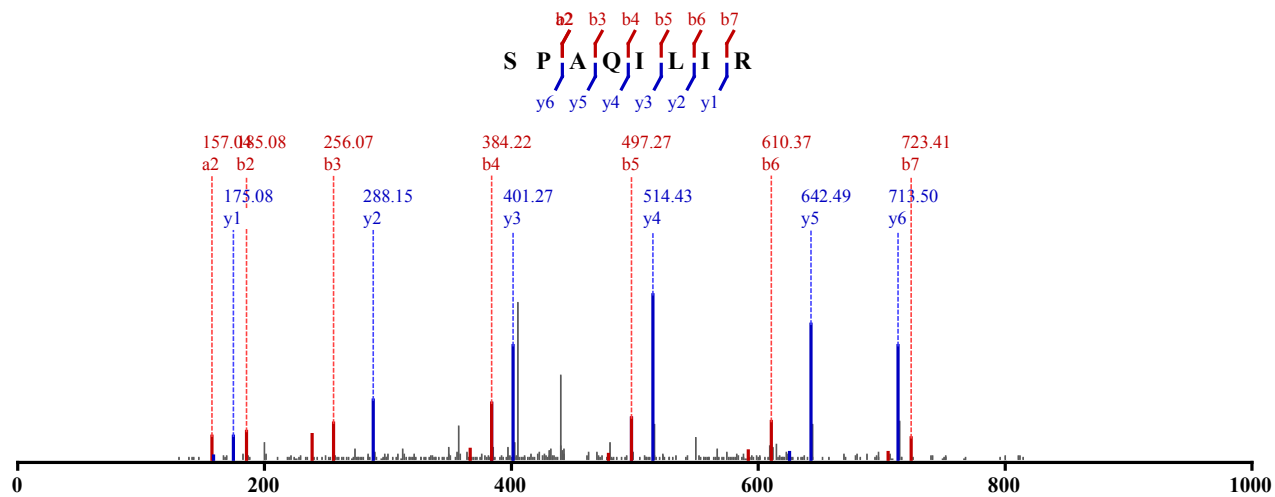

Not Modified

Identified in MSS79 with qvalue 0.00

Charge: 2, Exp. m/z: 449.279, Calc. m/z: 449.280

Data File: HeLa\_AspN-Try\_CID\_1, Scans: 26860 - 26860

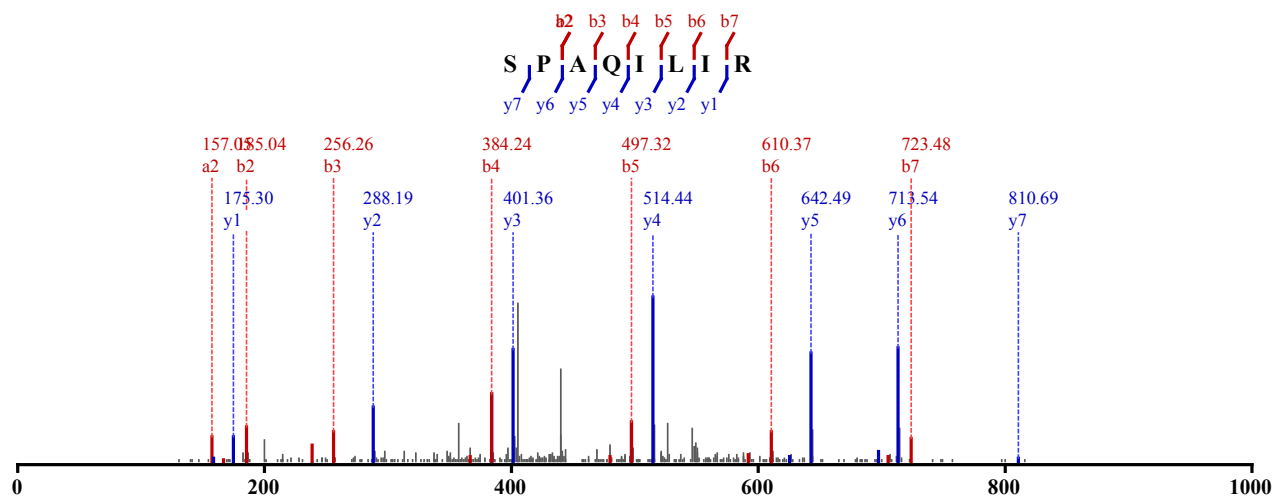

Not Modified

Identified in MSS79 with qvalue 0.00

Charge: 2, Exp. m/z: 449.280, Calc. m/z: 449.280

Data File: HeLa\_AspN-Try\_CID\_2, Scans: 27240 - 27240

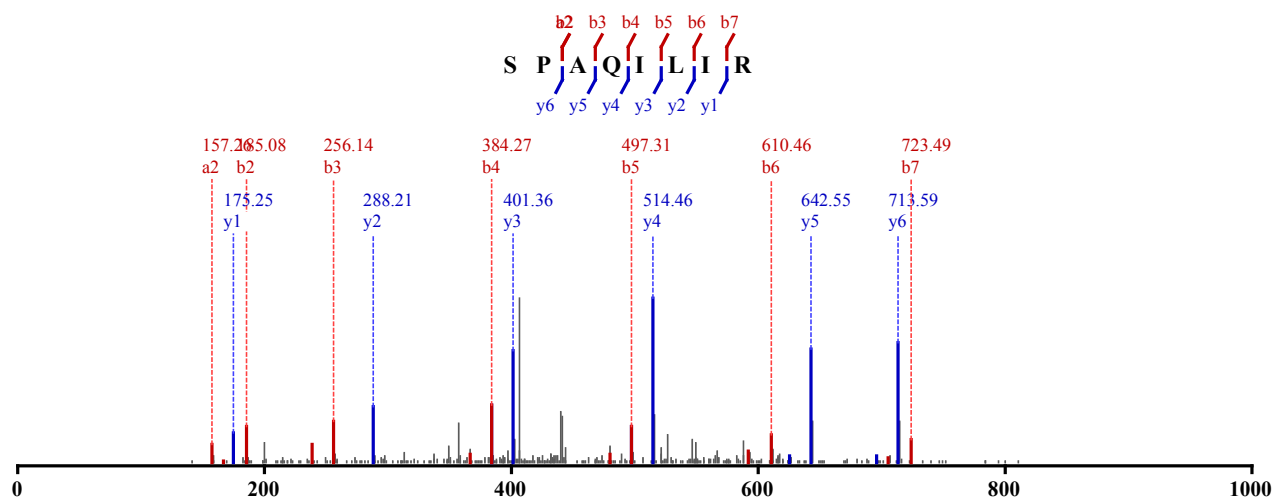

Not Modified

Identified in MSS79 with qvalue 0.00

Charge: 2, Exp. m/z: 449.280, Calc. m/z: 449.280



Data File: HeLa\_AspN-Try\_CID\_3, Scans: 27325 - 27325

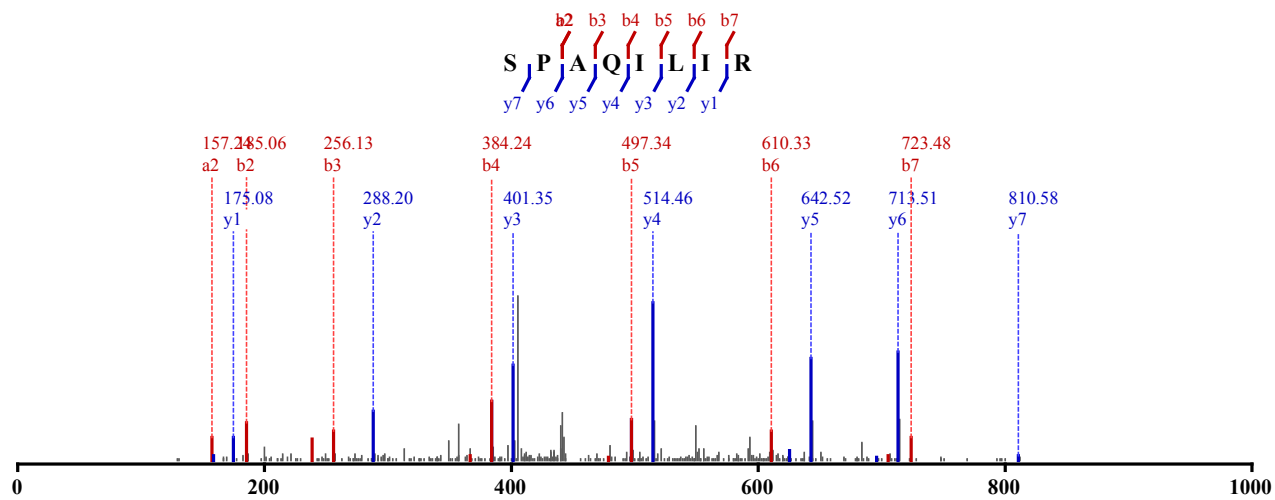

Not Modified

Identified in MSS91 with qvalue 0.00

Charge: 2, Exp. m/z: 449.279, Calc. m/z: 449.280

Data File: HeLa\_GET\_CID\_1, Scans: 25037 - 25037

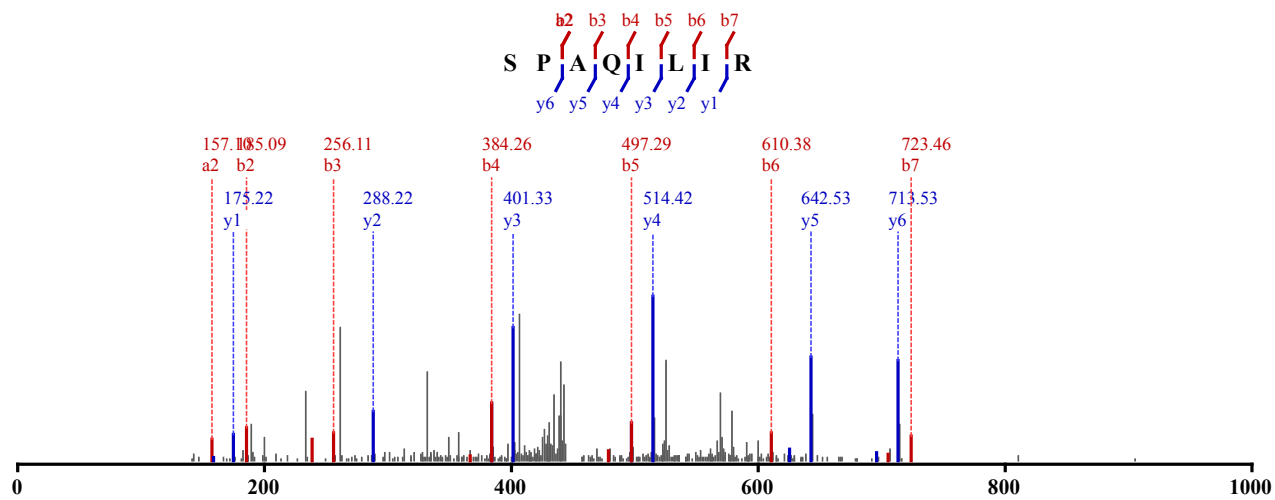

Not Modified

Identified in MSS90 with qvalue 0.00

Charge: 2, Exp. m/z: 449.279, Calc. m/z: 449.280

Data File: HeLa\_GCT\_CID\_1, Scans: 25838 - 25838

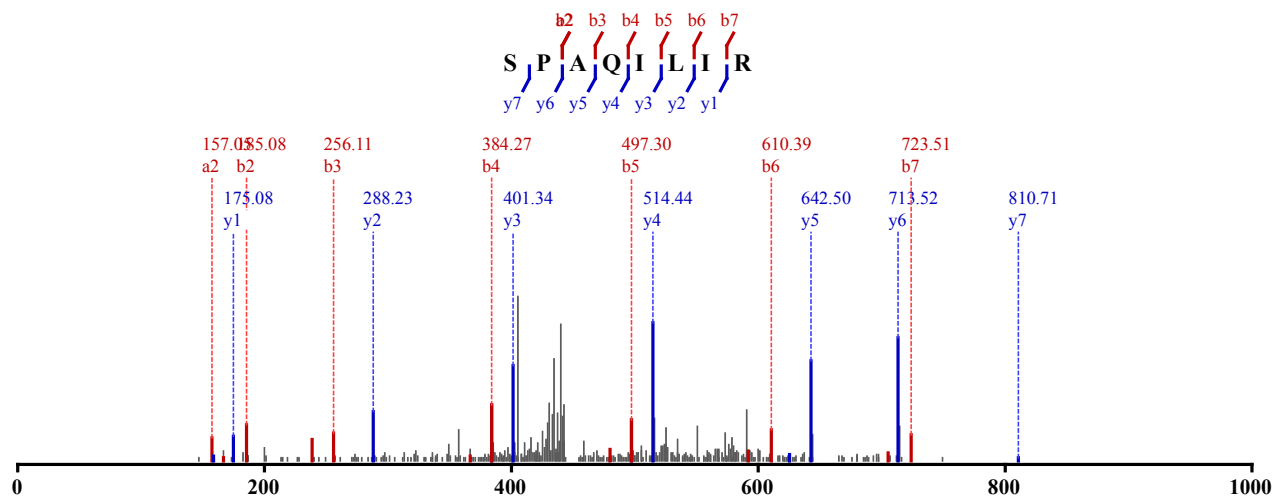

Not Modified

Identified in MSS100 with qvalue 0.00  
 Charge: 2, Exp. m/z: 449.280, Calc. m/z: 449.280  
 Data File: HeLa\_GluC-Try\_CID\_1, Scans: 25416 - 25416

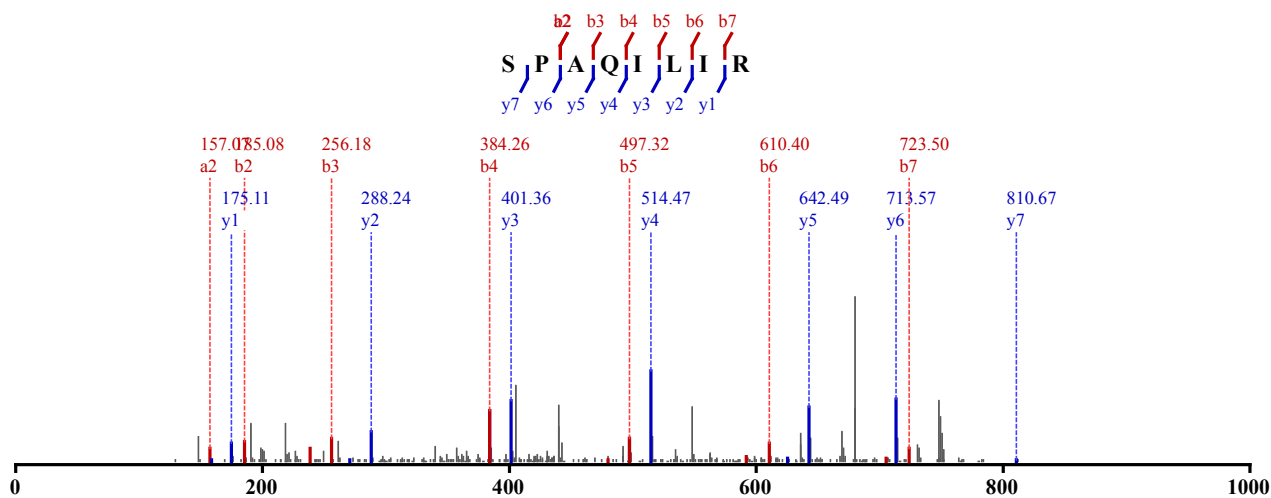

Not Modified  
 Identified in MSS100 with qvalue 0.00  
 Charge: 2, Exp. m/z: 449.279, Calc. m/z: 449.280  
 Data File: HeLa\_GluC-Try\_CID\_2, Scans: 26601 - 26601

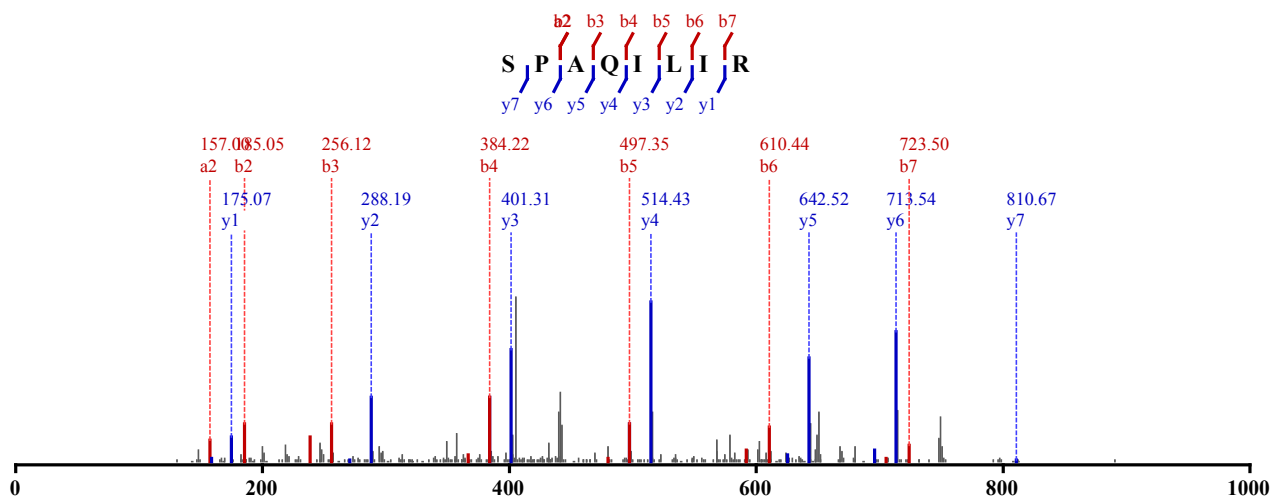

Not Modified  
 Identified in MSS100 with qvalue 0.00  
 Charge: 2, Exp. m/z: 449.279, Calc. m/z: 449.280  
 Data File: HeLa\_GluC-Try\_CID\_3, Scans: 26936 - 26936

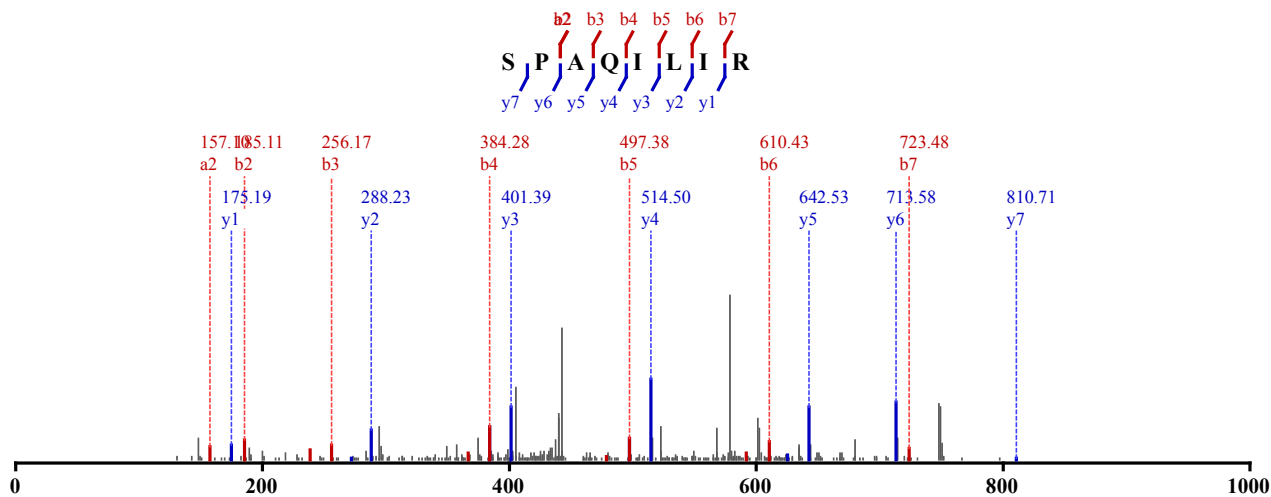

Not Modified

Identified in MSS110 with qvalue 0.00

Charge: 2, Exp. m/z: 449.280, Calc. m/z: 449.280

Data File: HeLa\_LysC-try\_CID\_2, Scans: 25799 - 25799

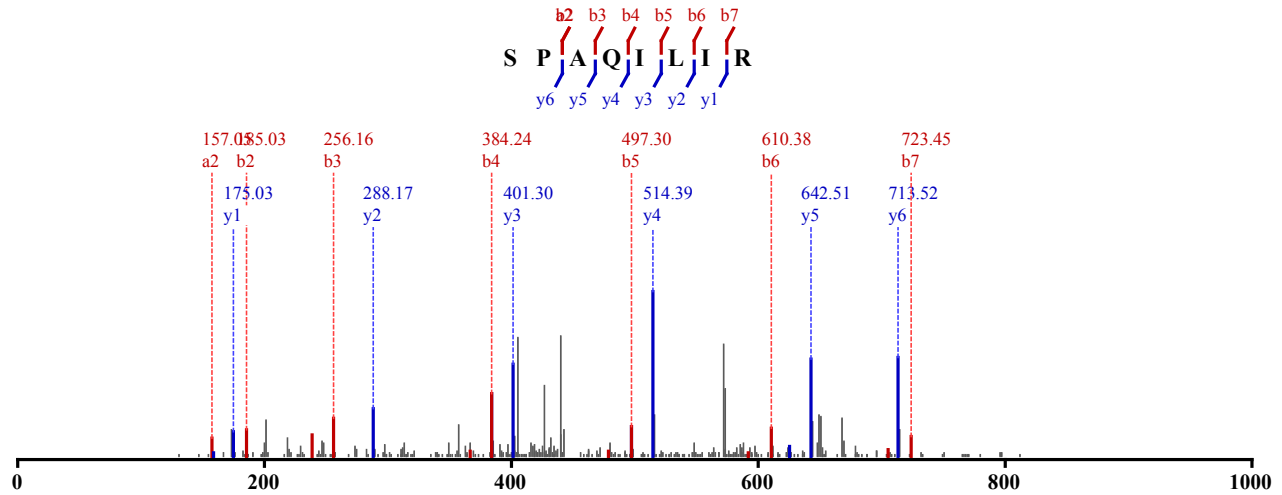

Not Modified

Identified in MSS113 with qvalue 0.00

Charge: 2, Exp. m/z: 449.279, Calc. m/z: 449.280

Data File: HeLa\_try\_CID\_1, Scans: 25468 - 25468

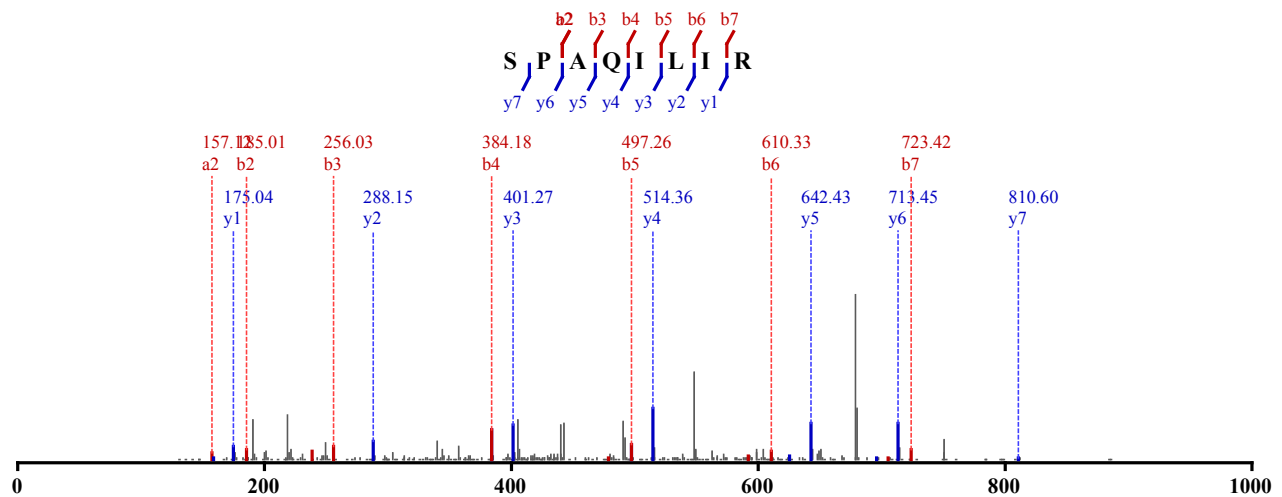

Not Modified

Identified in MSS113 with qvalue 0.00

Charge: 2, Exp. m/z: 449.280, Calc. m/z: 449.280

Data File: HeLa\_try\_CID\_2, Scans: 26414 - 26414

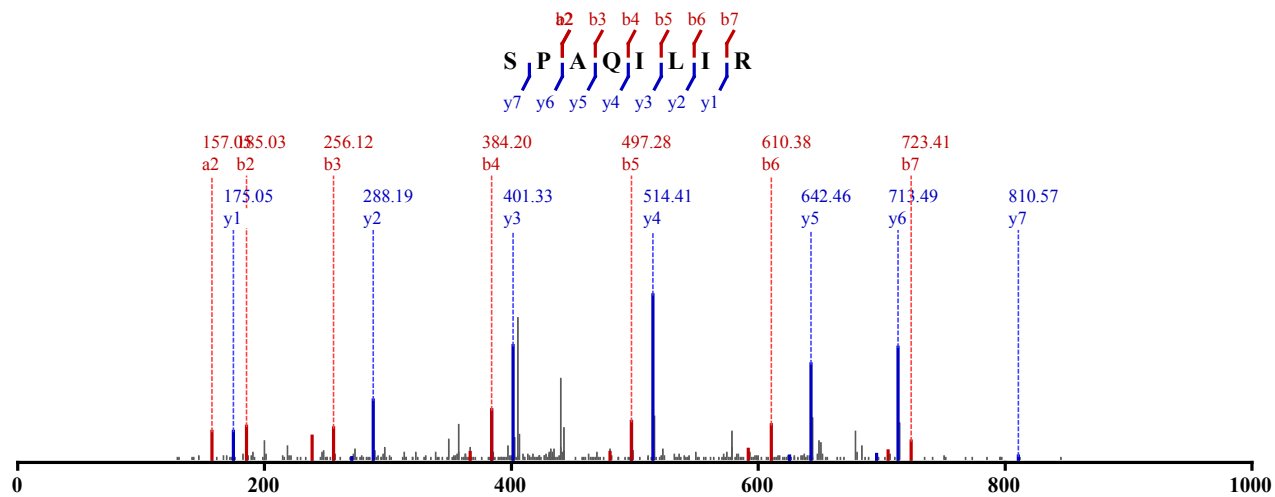

Not Modified

Identified in MSS113 with qvalue 0.00

Charge: 2, Exp. m/z: 449.280, Calc. m/z: 449.280

Data File: HeLa\_try\_CID\_3, Scans: 26971 - 26971

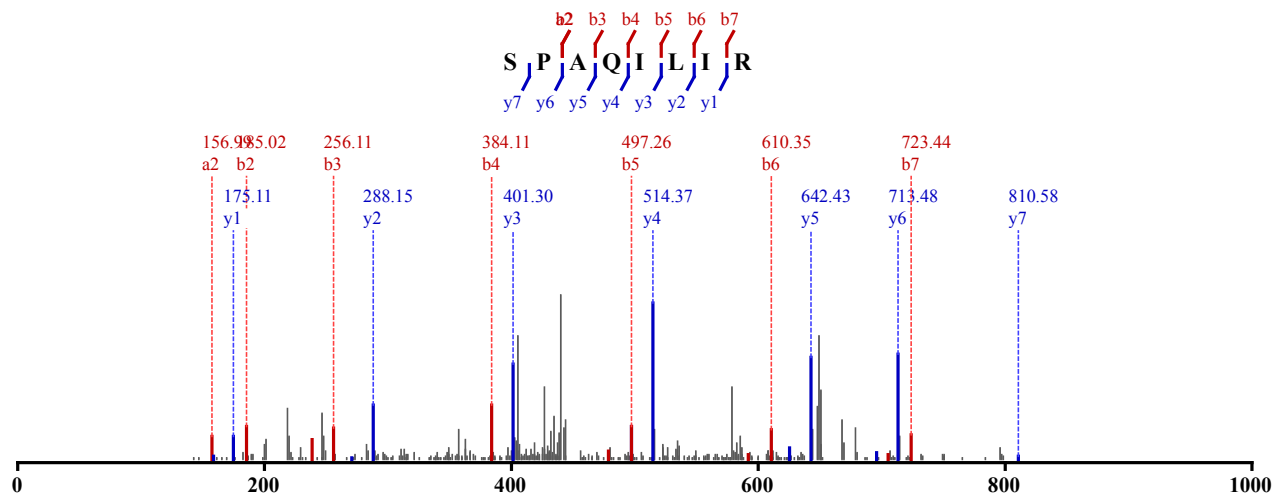

Not Modified

Identified in MSS122 with qvalue 0.00

Charge: 2, Exp. m/z: 449.279, Calc. m/z: 449.280

Data File: HeLa\_try\_HCD\_2, Scans: 26744 - 26744

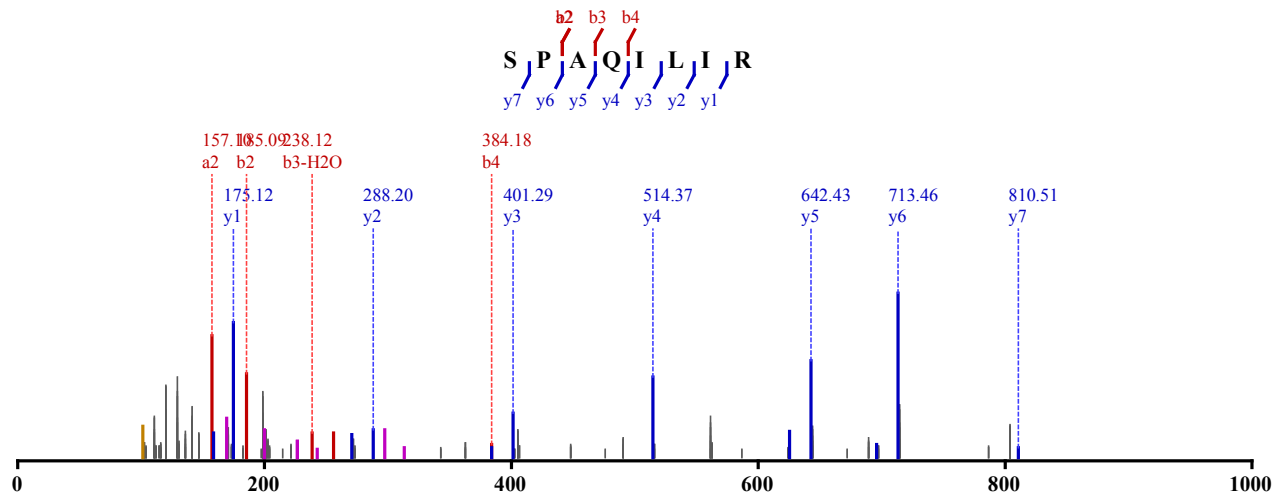

Not Modified

Identified in MSS122 with qvalue 0.00

Charge: 2, Exp. m/z: 449.280, Calc. m/z: 449.280

Data File: HeLa\_try\_HCD\_2, Scans: 26595 - 26595

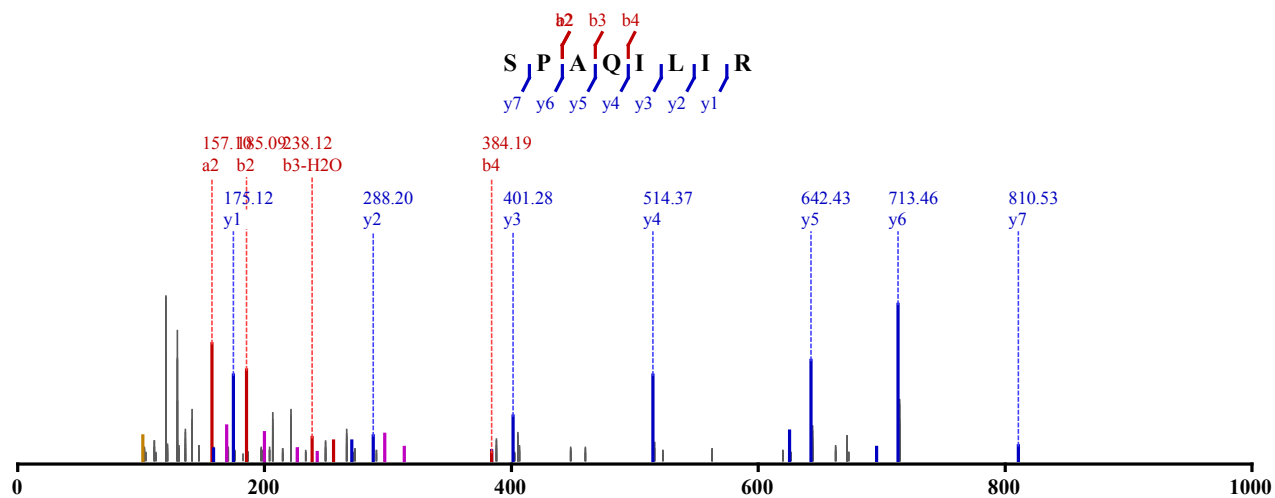

Not Modified

Identified in MSS122 with qvalue 0.00

Charge: 2, Exp. m/z: 449.279, Calc. m/z: 449.280

Data File: HeLa\_try\_HCD\_3, Scans: 26364 - 26364

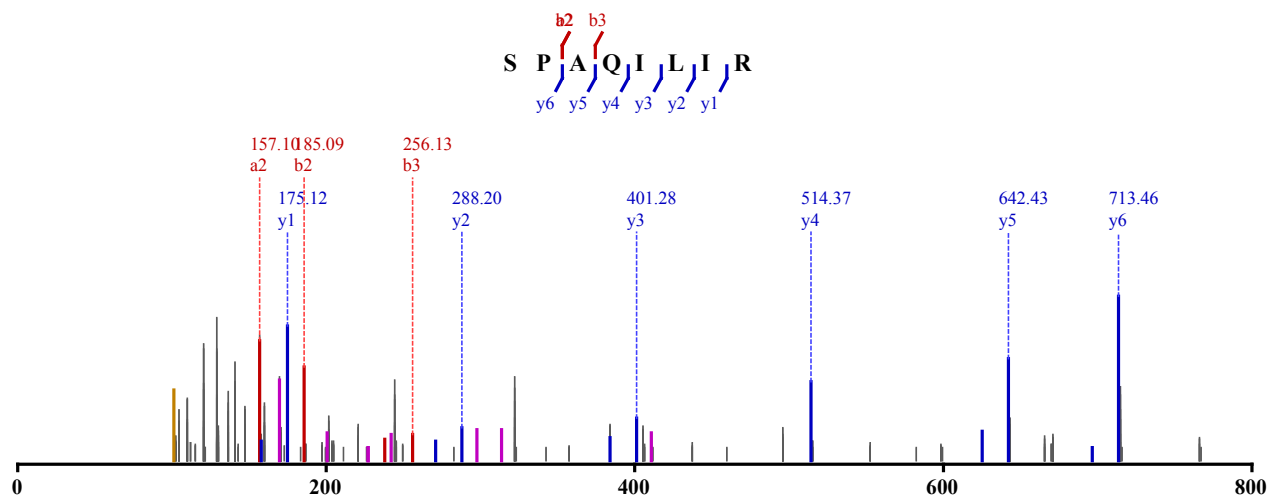

Not Modified

Identified in MSS130 with qvalue 0.00

Charge: 2, Exp. m/z: 449.280, Calc. m/z: 449.280

Data File: HeLa\_LysC-try\_HCD\_1, Scans: 20407 - 20407

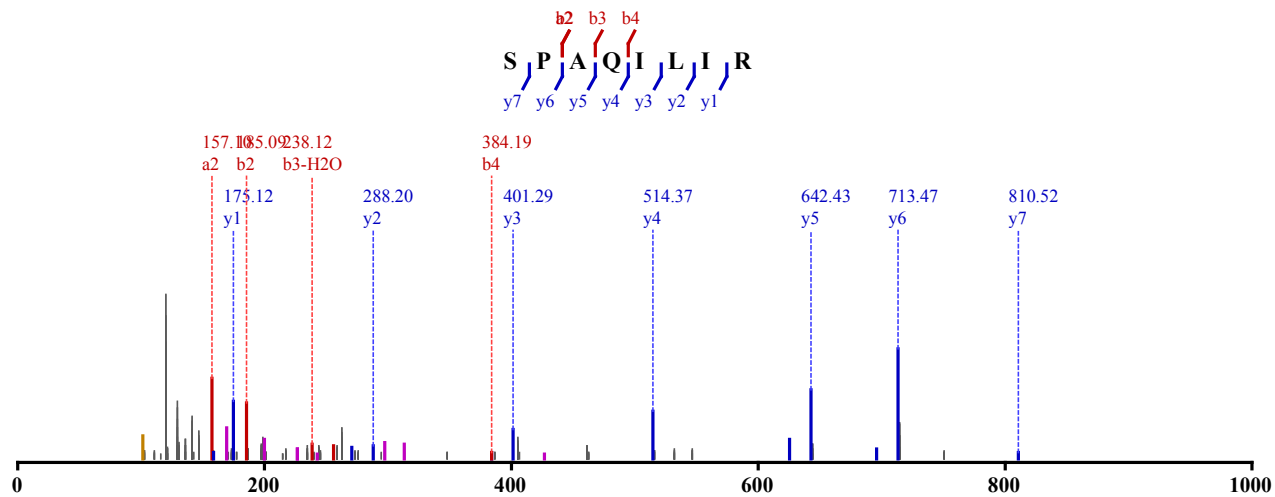

Not Modified

Identified in MSS130 with qvalue 0.00  
Charge: 2, Exp. m/z: 449.279, Calc. m/z: 449.280  
Data File: HeLa\_LysC-try\_HCD\_2, Scans: 27398 - 27398

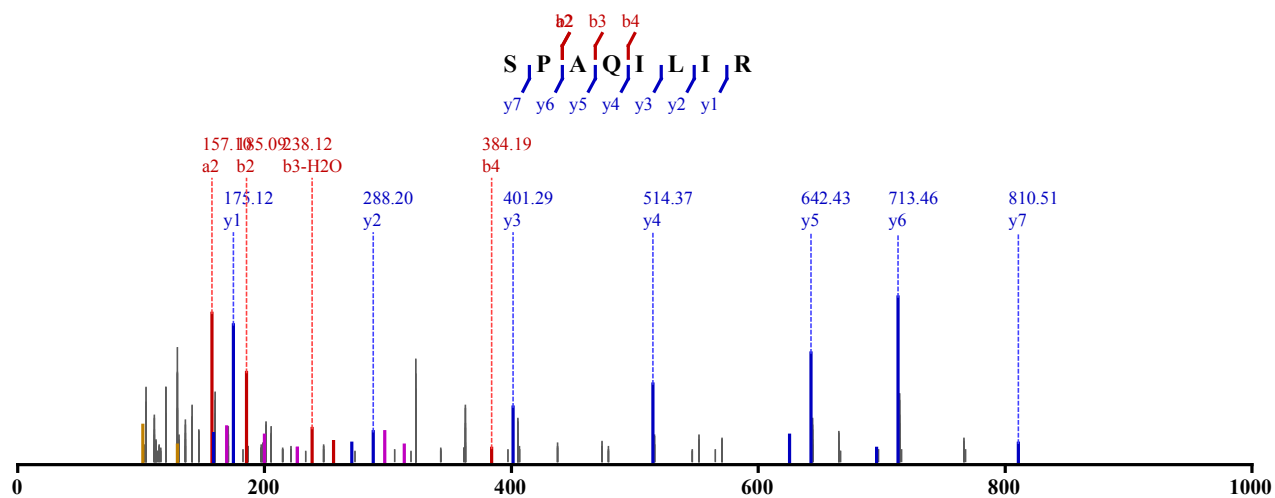

Not Modified  
Identified in MSS130 with qvalue 0.00  
Charge: 2, Exp. m/z: 449.279, Calc. m/z: 449.280  
Data File: HeLa\_LysC-try\_HCD\_3, Scans: 26658 - 26658

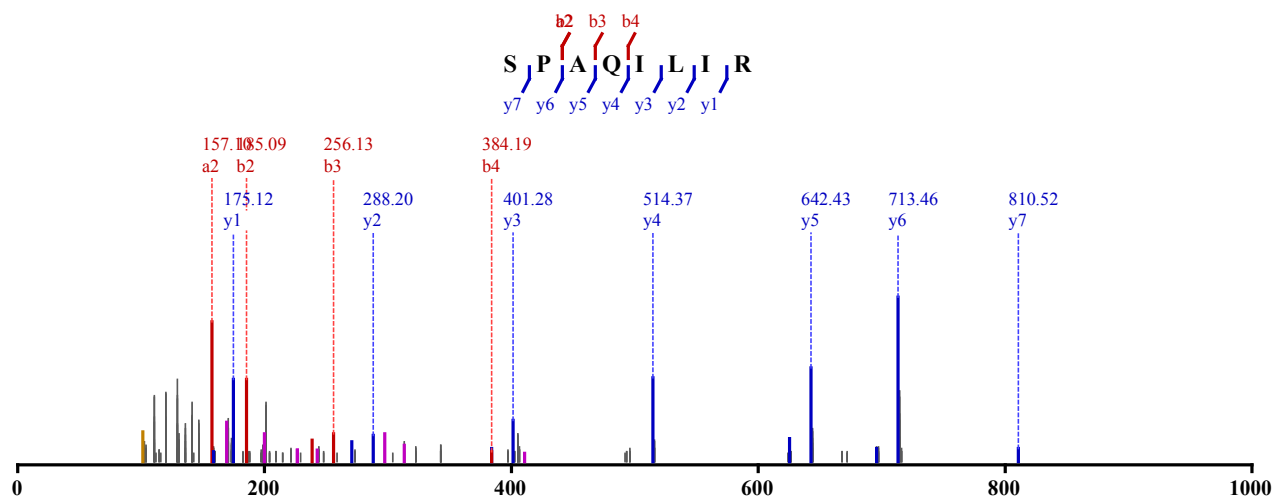

Not Modified  
Identified in MSS134 with qvalue 0.00  
Charge: 2, Exp. m/z: 449.280, Calc. m/z: 449.280  
Data File: HeLa\_GluC-try\_HCD\_2, Scans: 26925 - 26925

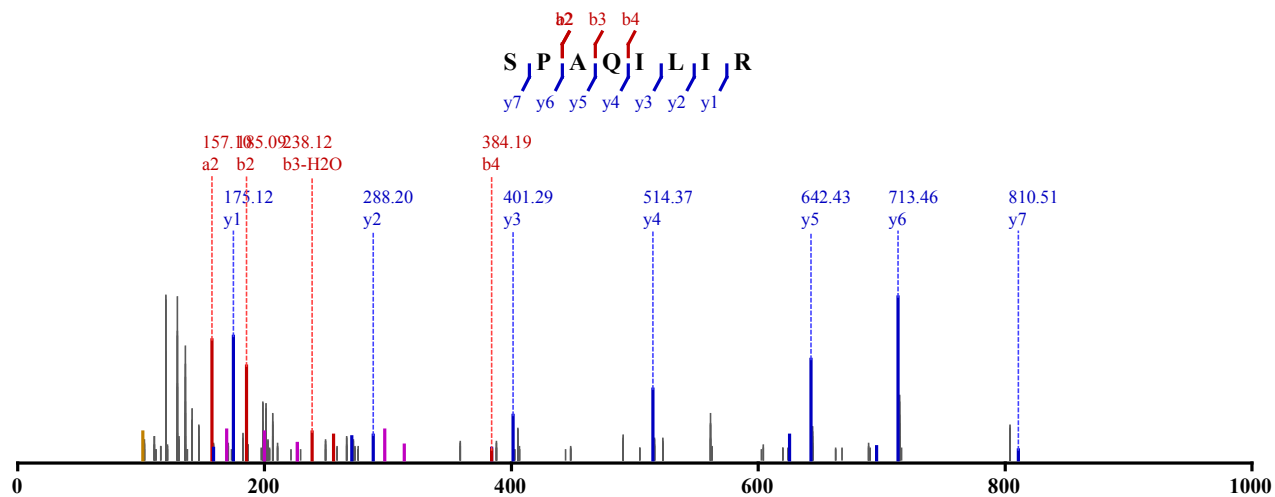

Not Modified

Identified in MSS139 with qvalue 0.00

Charge: 2, Exp. m/z: 449.279, Calc. m/z: 449.280

Data File: HeLa\_chytry-try\_HCD\_1, Scans: 26695 - 26695

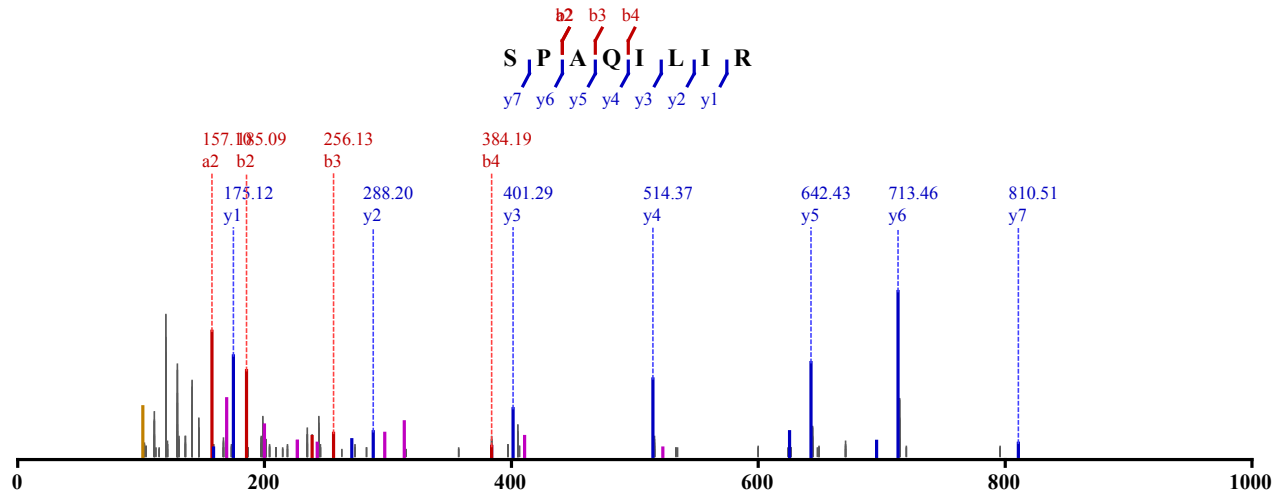

Not Modified

Identified in MSS139 with qvalue 0.00

Charge: 2, Exp. m/z: 449.278, Calc. m/z: 449.280

Data File: HeLa\_chytry-try\_HCD\_2, Scans: 26914 - 26914

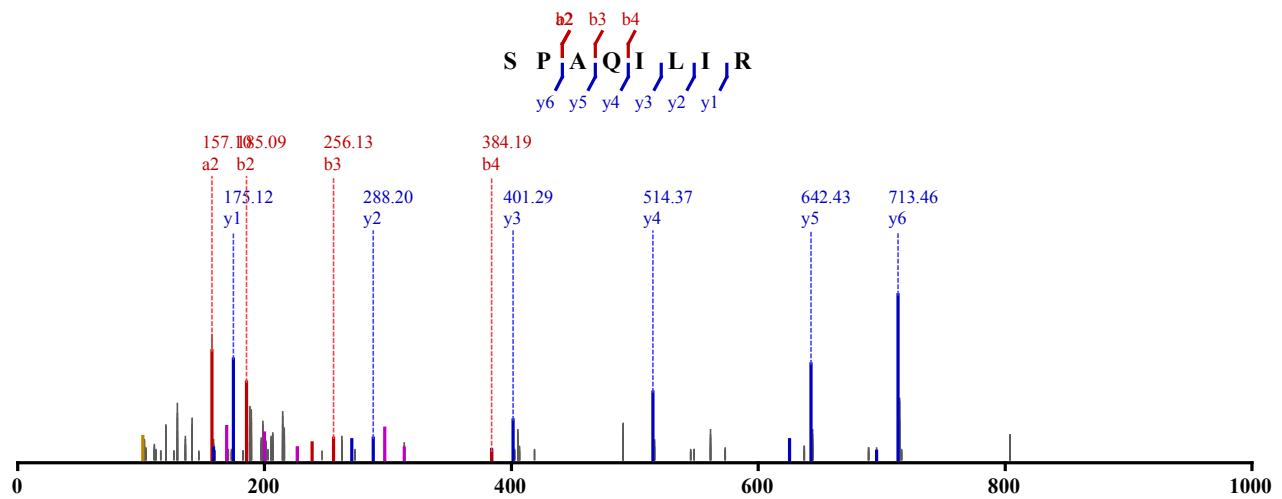

Not Modified

Identified in MSS139 with qvalue 0.00

Charge: 2, Exp. m/z: 449.279, Calc. m/z: 449.280

Data File: HeLa\_chytry-try\_HCD\_3, Scans: 26082 - 26082

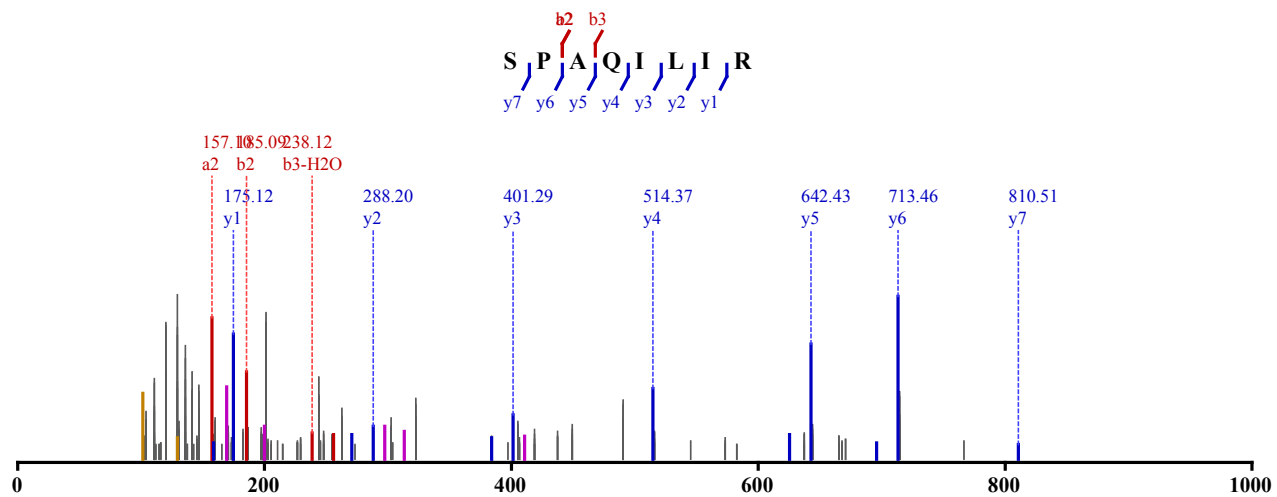

Not Modified

Identified in MSS141 with qvalue 0.01

Charge: 2, Exp. m/z: 449.280, Calc. m/z: 449.280

Data File: HeLa\_AspN-try\_HCD\_3, Scans: 22495 - 22495

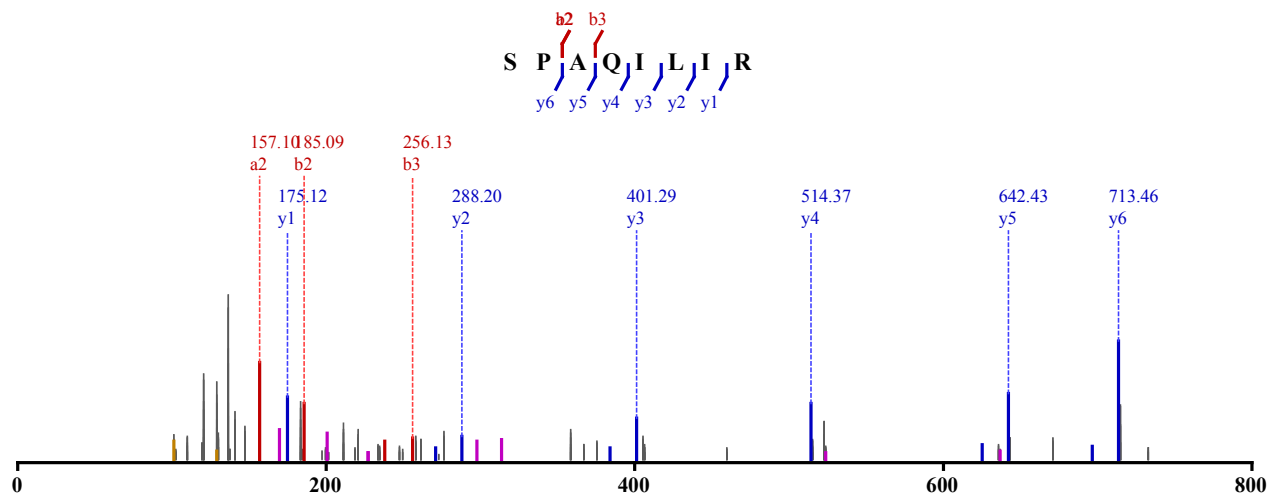

Not Modified

Identified in MSS241 with qvalue 0.00

Charge: 2, Exp. m/z: 449.279, Calc. m/z: 449.280

Data File: HeLa\_try\_CID-ETD\_1, Scans: 18699 - 18699

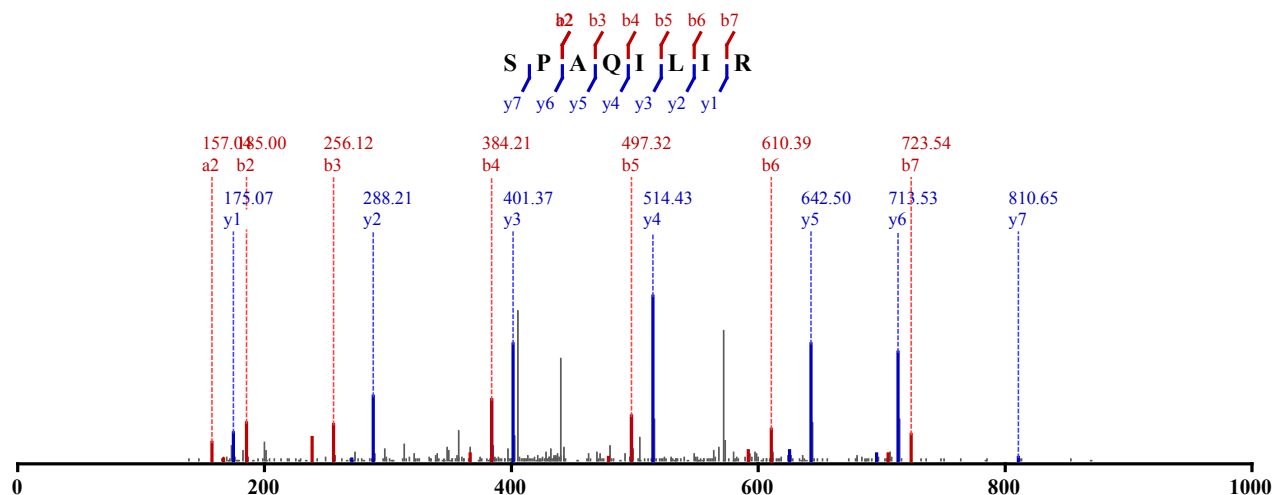

Not Modified

Identified in MSS262 with qvalue 0.00

Charge: 2, Exp. m/z: 449.280, Calc. m/z: 449.280



Data File: HeLa\_ArgC-Try\_CID\_1, Scans: 20185 - 20185

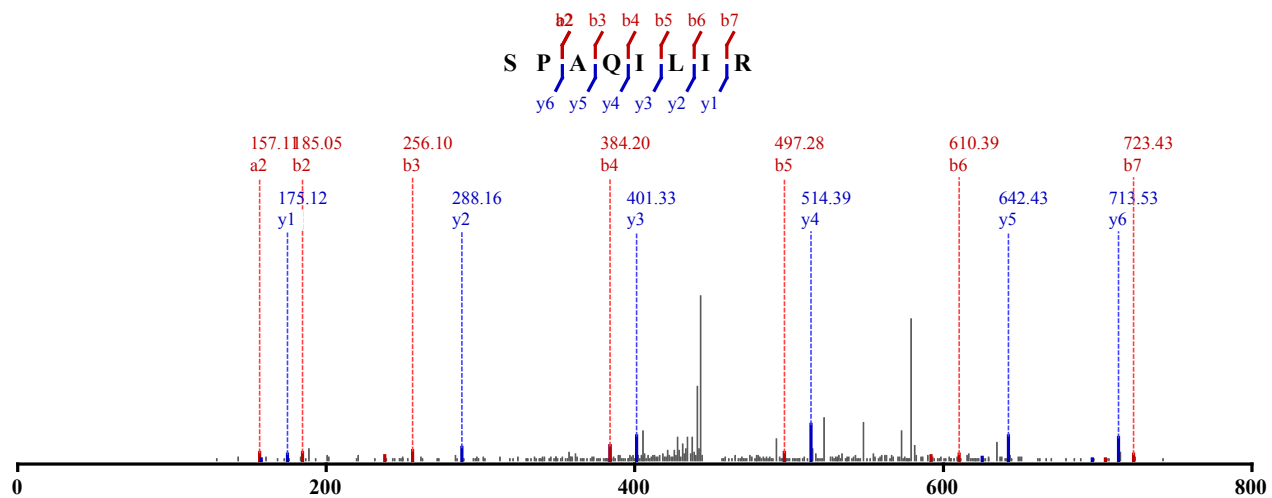

Not Modified

Identified in MSS425 with qvalue 0.00

Charge: 2, Exp. m/z: 449.279, Calc. m/z: 449.280

Data File: HeLa\_AspN-Try\_CID-ETD\_1, Scans: 17677 - 17677

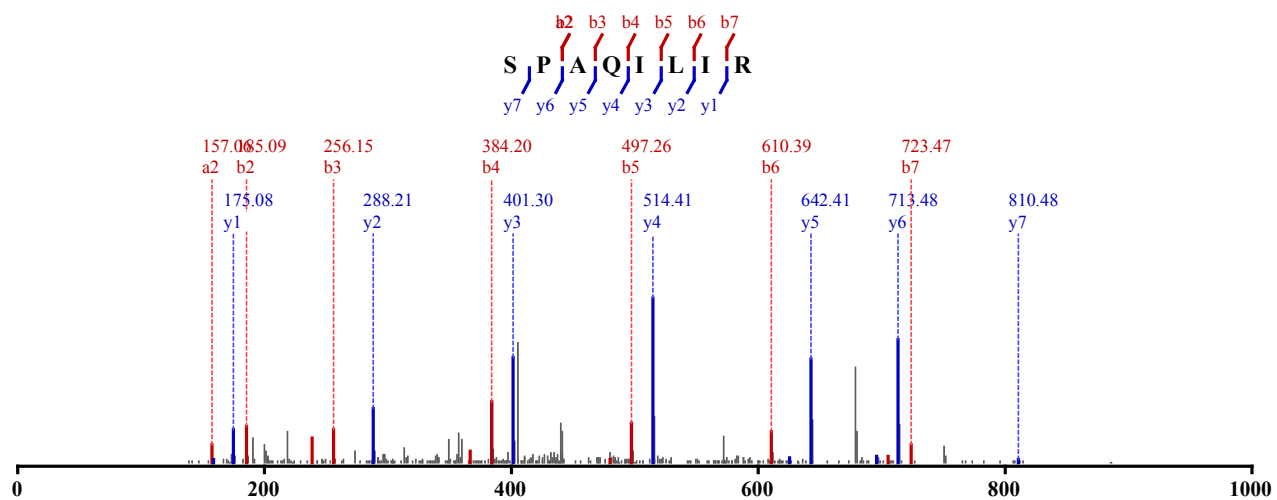

Not Modified

Identified in MSS427 with qvalue 0.00

Charge: 2, Exp. m/z: 449.280, Calc. m/z: 449.280

Data File: HeLa\_chytry-try\_CID-ETD\_2, Scans: 17926 - 17926

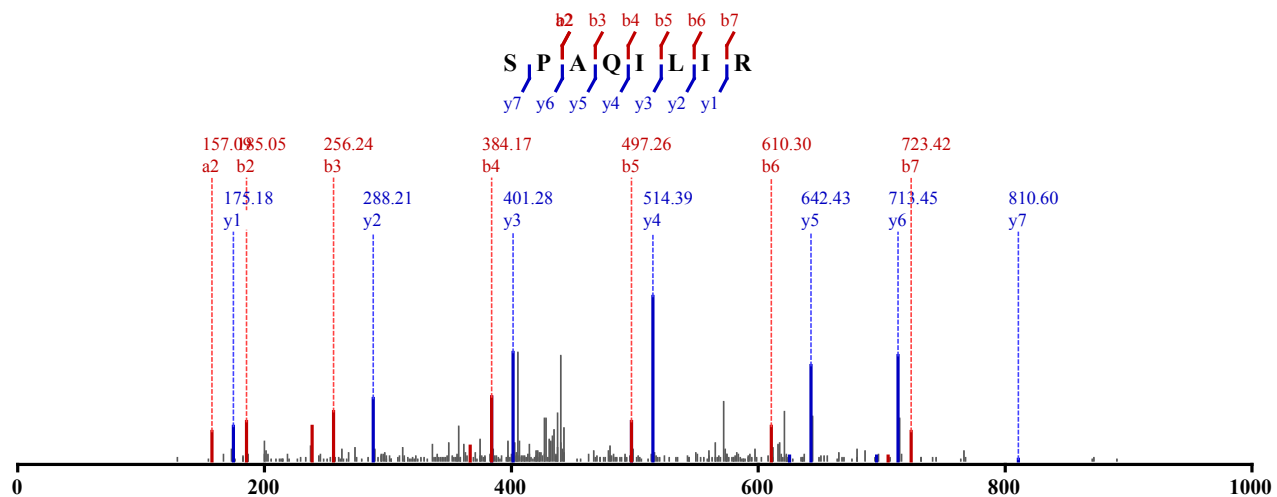

Not Modified

Identified in MSS431 with qvalue 0.00

Charge: 2, Exp. m/z: 449.280, Calc. m/z: 449.280

Data File: HeLa\_GluC-Try\_CID-ETD\_1, Scans: 19450 - 19450

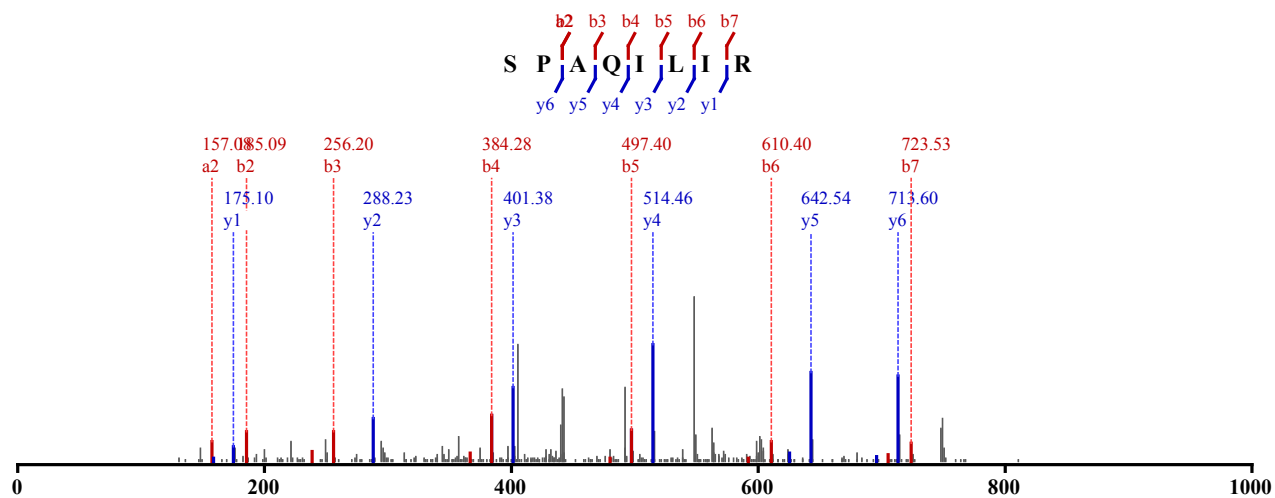

Not Modified

Identified in MSS434 with qvalue 0.00

Charge: 2, Exp. m/z: 449.280, Calc. m/z: 449.280

Data File: HeLa\_LysC-try\_CID-ETD\_1, Scans: 18729 - 18729

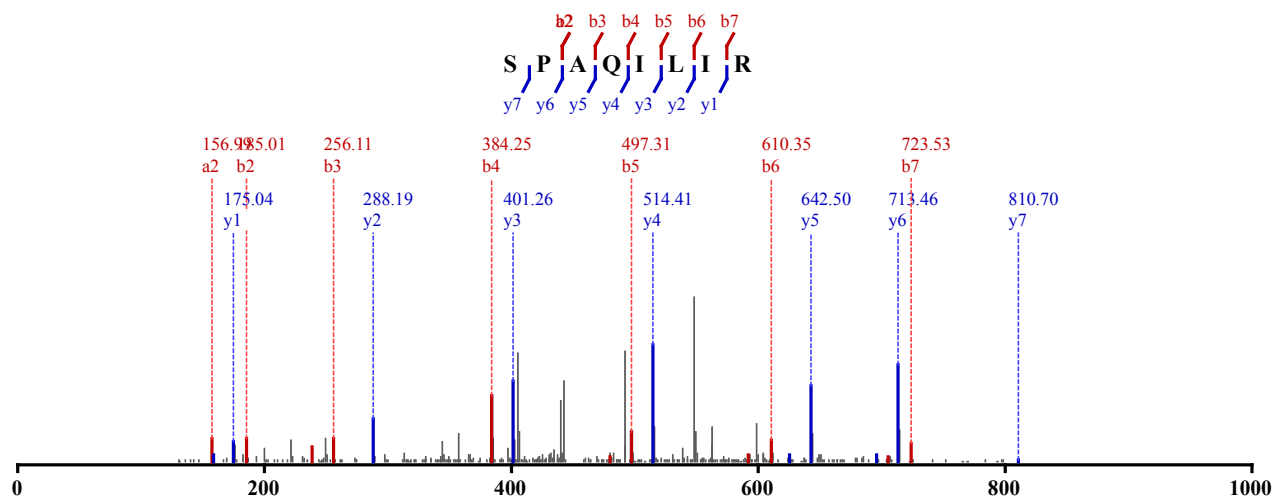

Not Modified

Identified in MSS434 with qvalue 0.00

Charge: 2, Exp. m/z: 449.280, Calc. m/z: 449.280

Data File: HeLa\_LysC-try\_CID-ETD\_2, Scans: 17098 - 17098

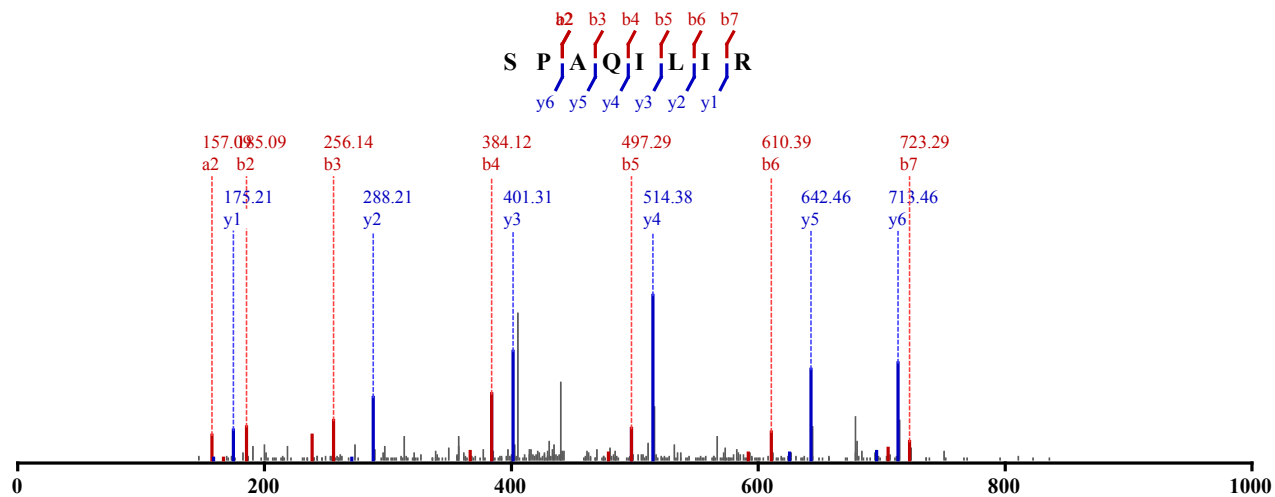

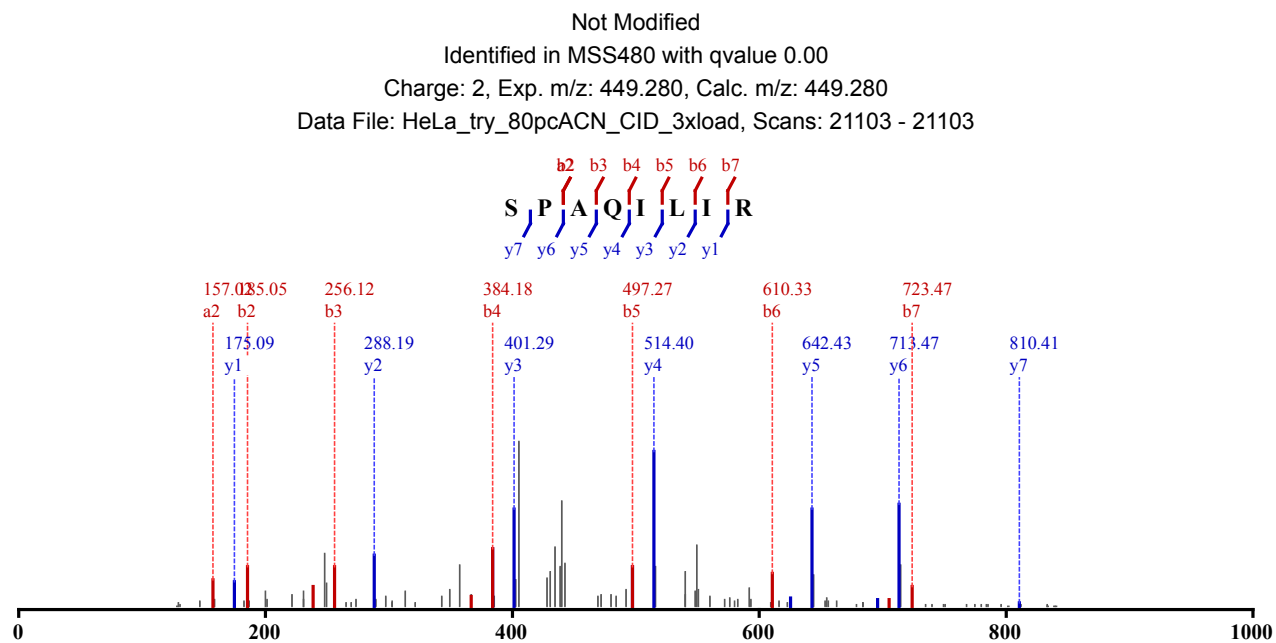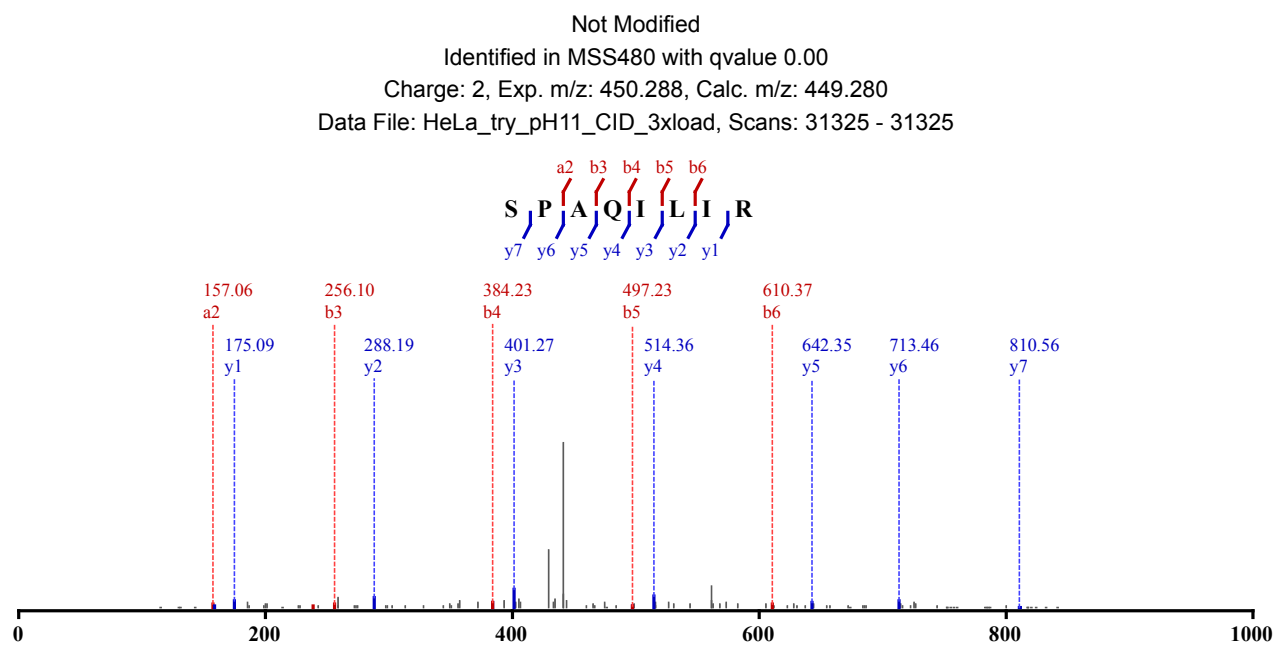

Not Modified  
 Identified in MSS480 with qvalue 0.00  
 Charge: 2, Exp. m/z: 449.280, Calc. m/z: 449.280  
 Data File: HeLa\_try\_pH11\_CID\_3xload, Scans: 31481 - 31481

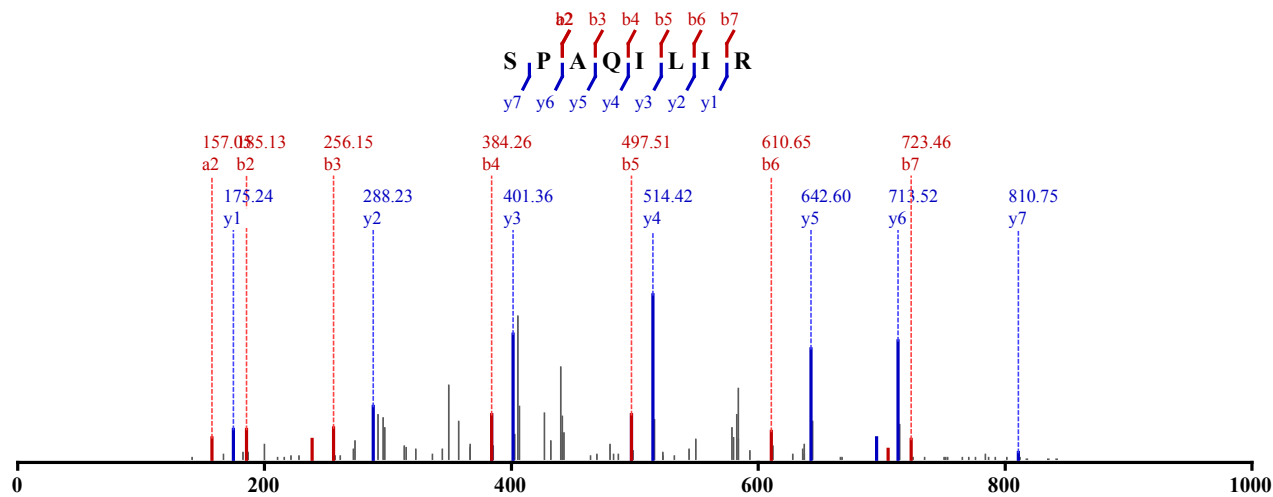

Not Modified  
 Identified in MSS480 with qvalue 0.00  
 Charge: 2, Exp. m/z: 449.281, Calc. m/z: 449.280  
 Data File: HeLa\_try\_pH8\_CID\_3xload\_2, Scans: 29574 - 29574

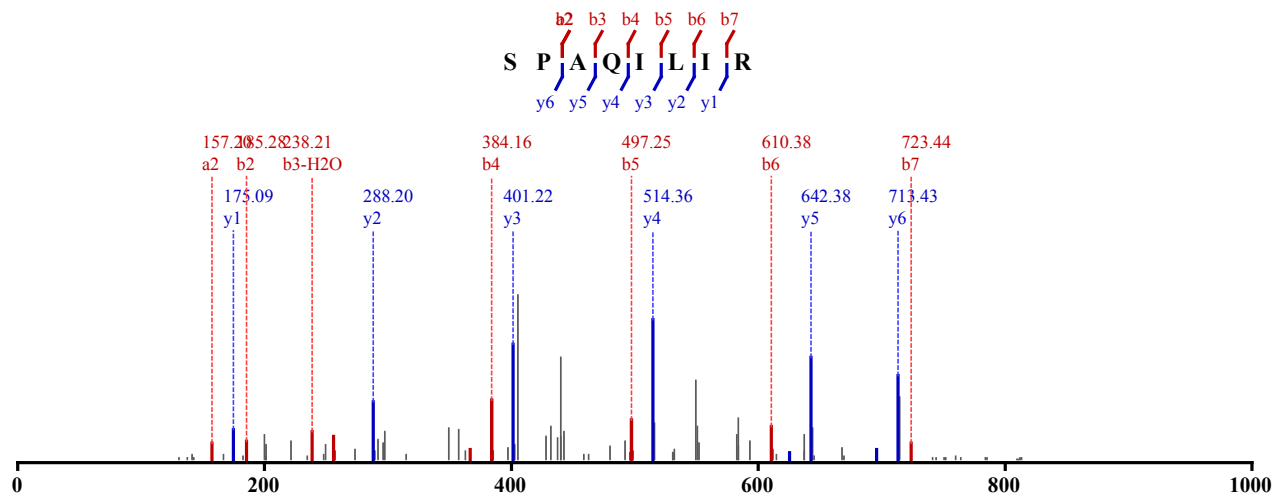

Not Modified  
 Identified in MSS480 with qvalue 0.00  
 Charge: 2, Exp. m/z: 449.281, Calc. m/z: 449.279  
 Data File: HeLa\_try\_pH11\_CID\_3xload\_2, Scans: 36713 - 36713

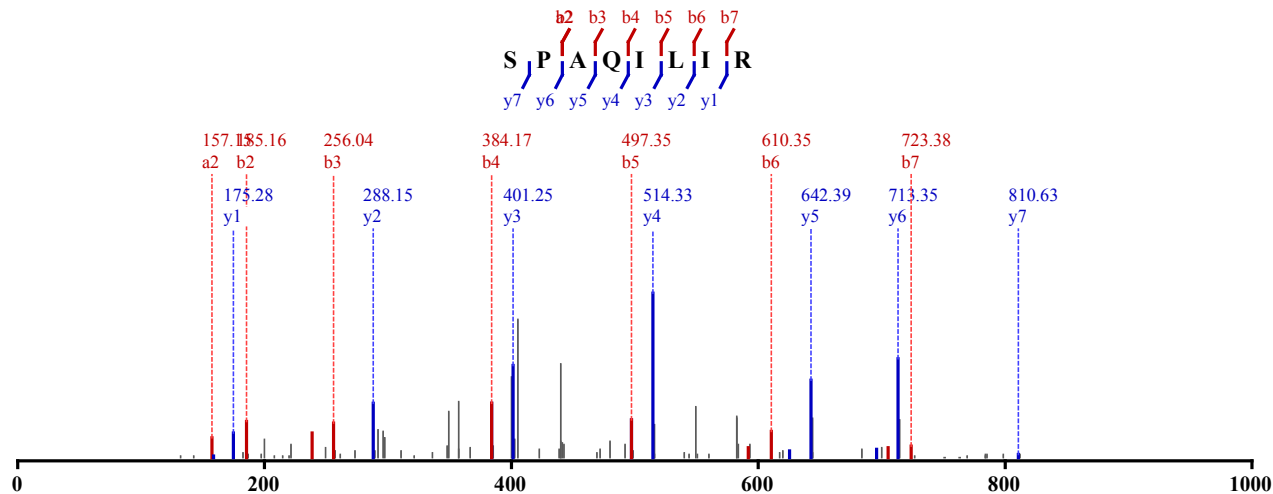

Not Modified  
 Identified in MSS484 with qvalue 0.00  
 Charge: 2, Exp. m/z: 449.279, Calc. m/z: 449.280

Data File: HeLa\_Try\_pH11\_HCD\_1, Scans: 37468 - 37468

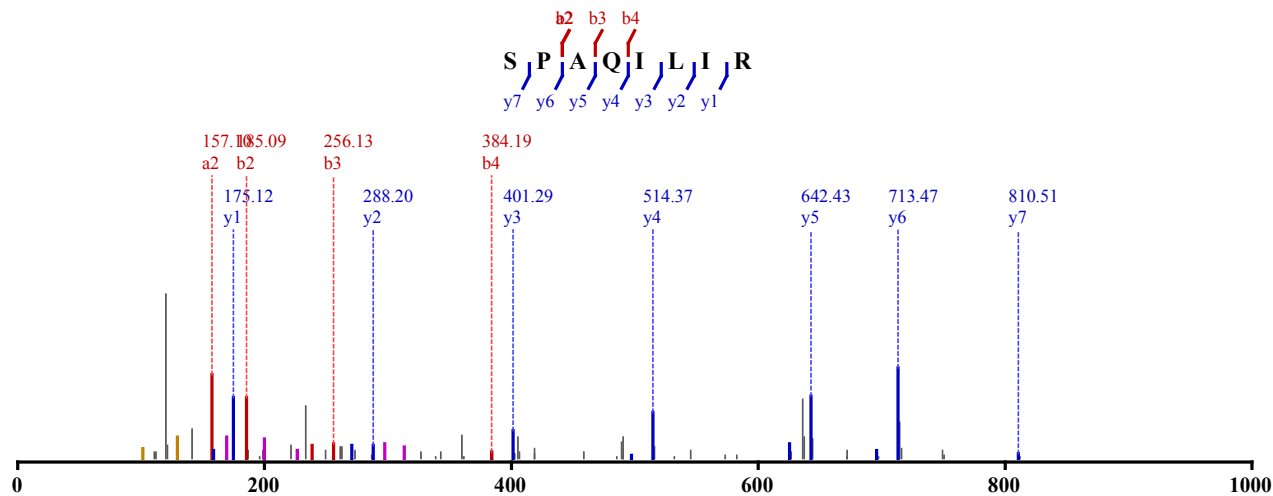

Not Modified

Identified in MSS484 with qvalue 0.00

Charge: 2, Exp. m/z: 449.279, Calc. m/z: 449.280

Data File: HeLa\_Try\_pH11\_HCD\_2, Scans: 38450 - 38450

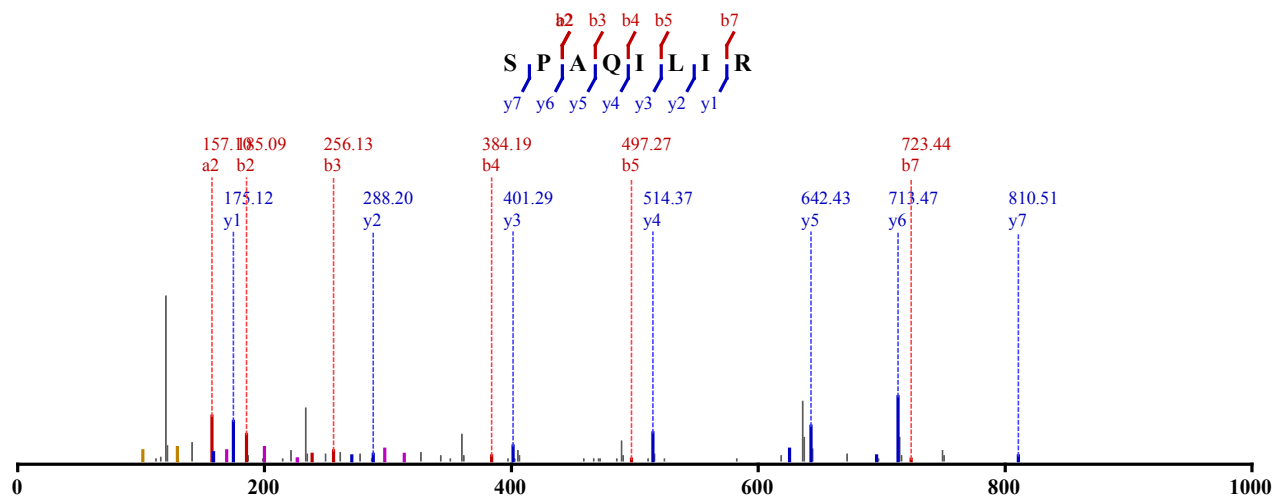

Not Modified

Identified in MSS484 with qvalue 0.00

Charge: 2, Exp. m/z: 449.279, Calc. m/z: 449.280

Data File: HeLa\_Try\_pH11\_HCD\_3, Scans: 34360 - 34360

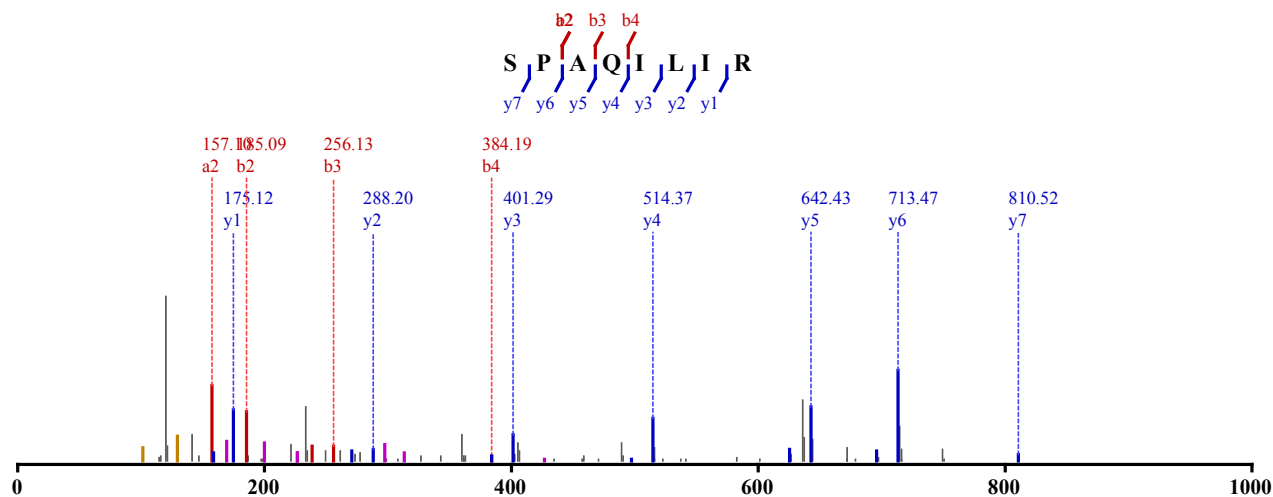

Not Modified

Identified in MSS487 with qvalue 0.00  
 Charge: 2, Exp. m/z: 449.279, Calc. m/z: 449.279  
 Data File: HeLa\_ArgC-Try\_pH8\_HCD\_3, Scans: 27757 - 27757

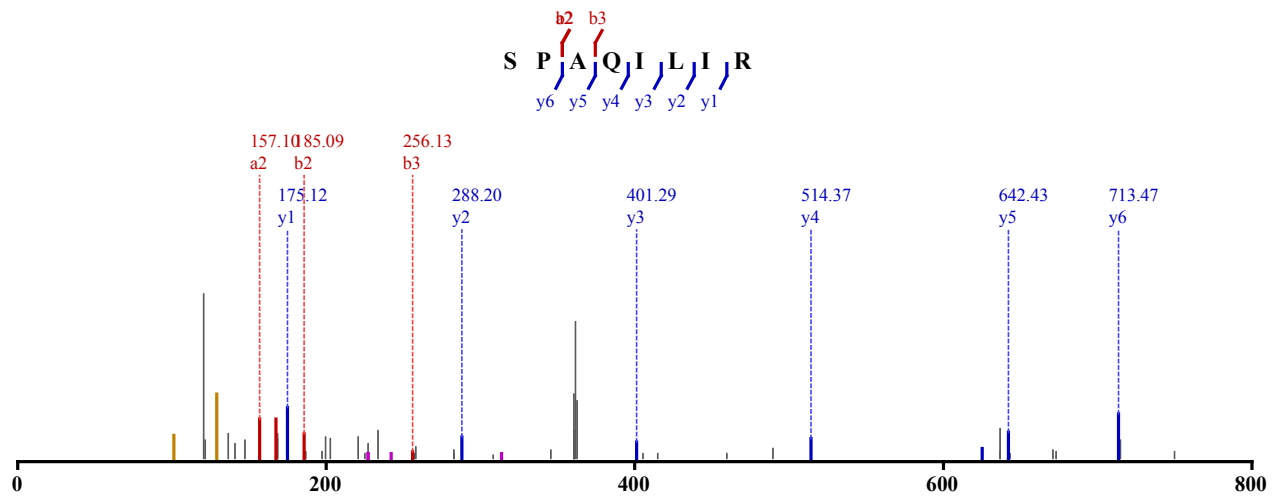

Not Modified  
 Identified in MSS487 with qvalue 0.00  
 Charge: 2, Exp. m/z: 449.279, Calc. m/z: 449.279  
 Data File: HeLa\_ArgC-Try\_pH8\_HCD\_3, Scans: 28010 - 28010

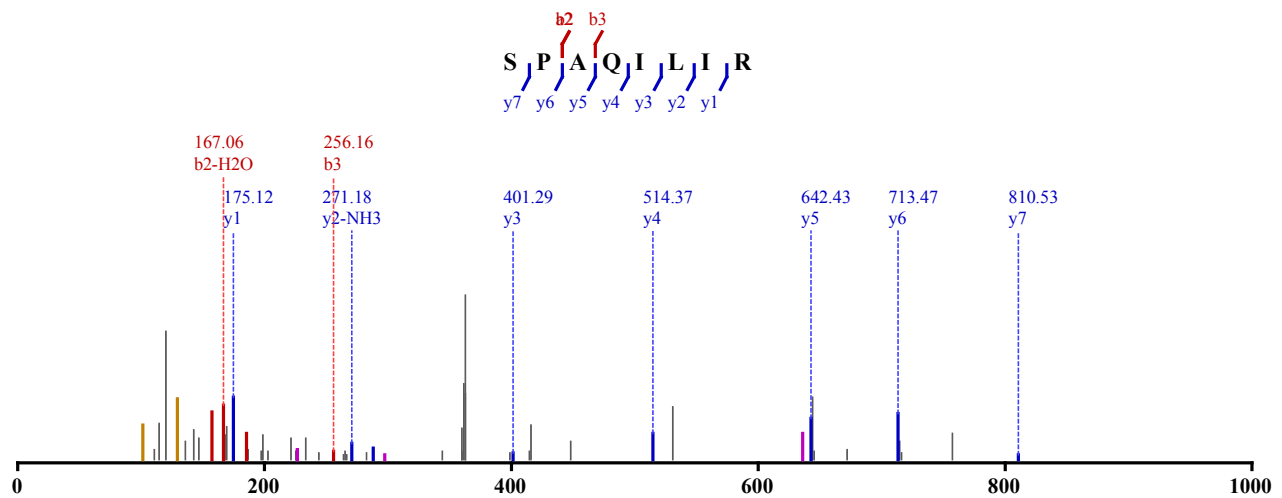

Not Modified  
 Identified in MSS487 with qvalue 0.00  
 Charge: 2, Exp. m/z: 449.279, Calc. m/z: 449.280  
 Data File: HeLa\_ArgC-Try\_pH11\_HCD\_2, Scans: 31348 - 31348

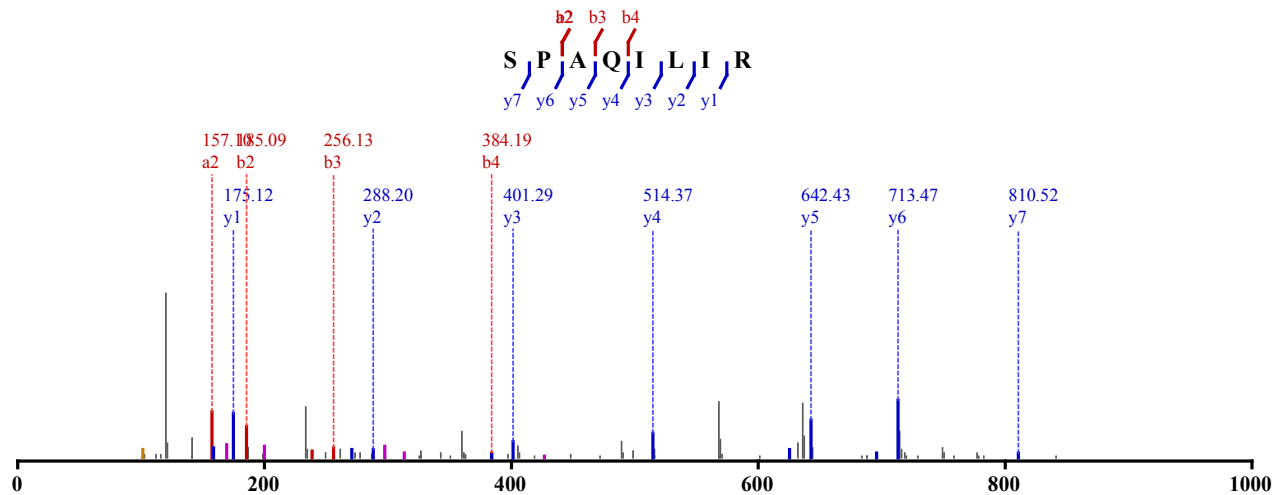

Not Modified  
Identified in MSS487 with qvalue 0.00  
Charge: 2, Exp. m/z: 449.279, Calc. m/z: 449.280  
Data File: HeLa\_ArgC-Try\_pH11\_HCD\_2, Scans: 31436 - 31436

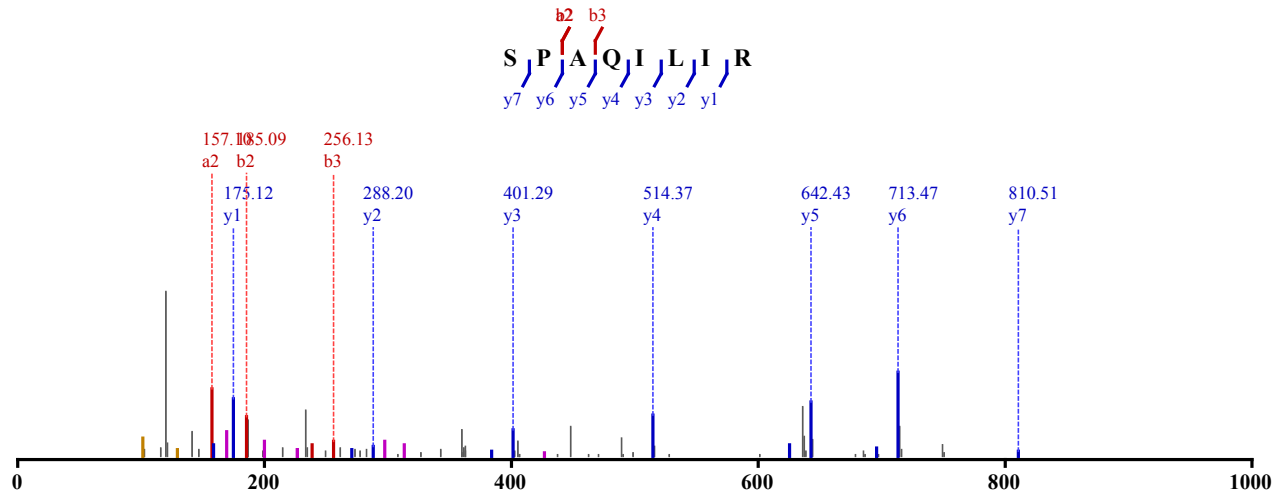

Not Modified  
Identified in MSS487 with qvalue 0.00  
Charge: 2, Exp. m/z: 449.279, Calc. m/z: 449.280  
Data File: HeLa\_ArgC-Try\_pH11\_HCD\_3, Scans: 32658 - 32658

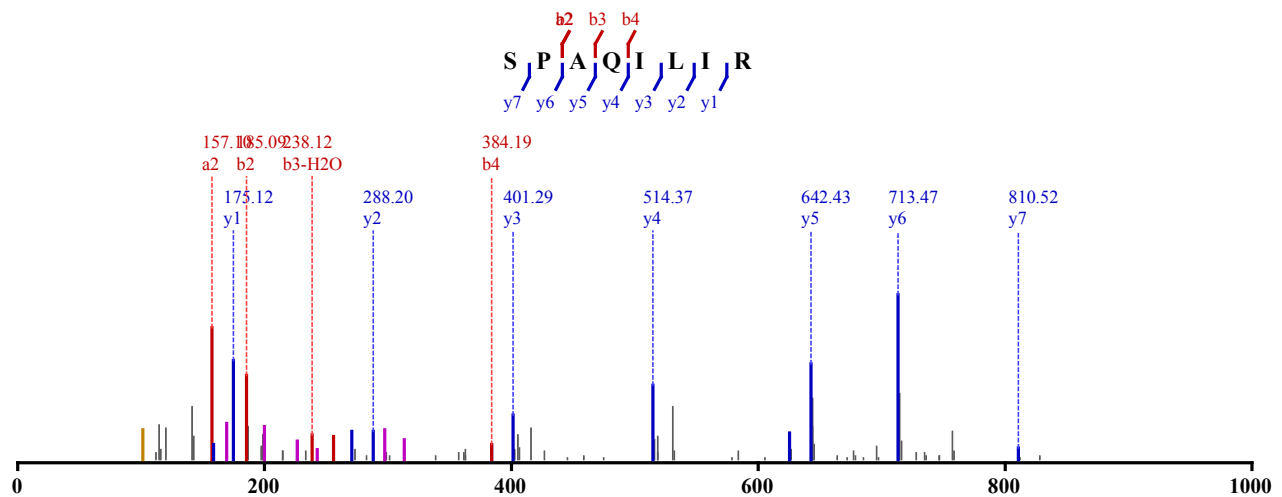

Not Modified  
Identified in MSS487 with qvalue 0.00  
Charge: 2, Exp. m/z: 449.279, Calc. m/z: 449.280  
Data File: HeLa\_ArgC-Try\_pH11\_HCD\_3, Scans: 32743 - 32743

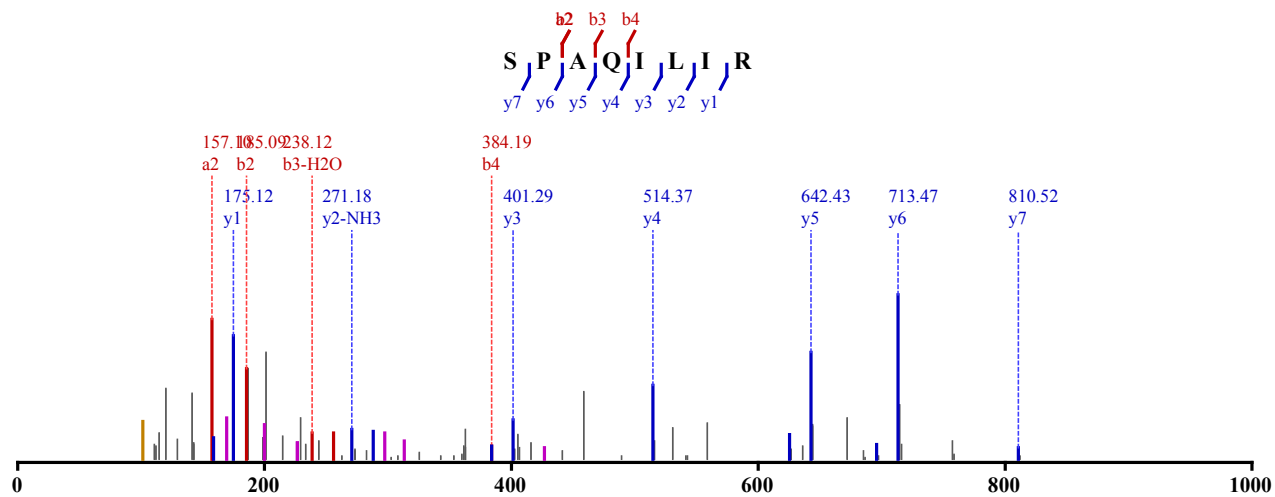

Not Modified

Identified in MSS487 with qvalue 0.00

Charge: 2, Exp. m/z: 449.279, Calc. m/z: 449.280

Data File: HeLa\_ArgC-Try\_pH8\_HCD\_1, Scans: 22033 - 22033

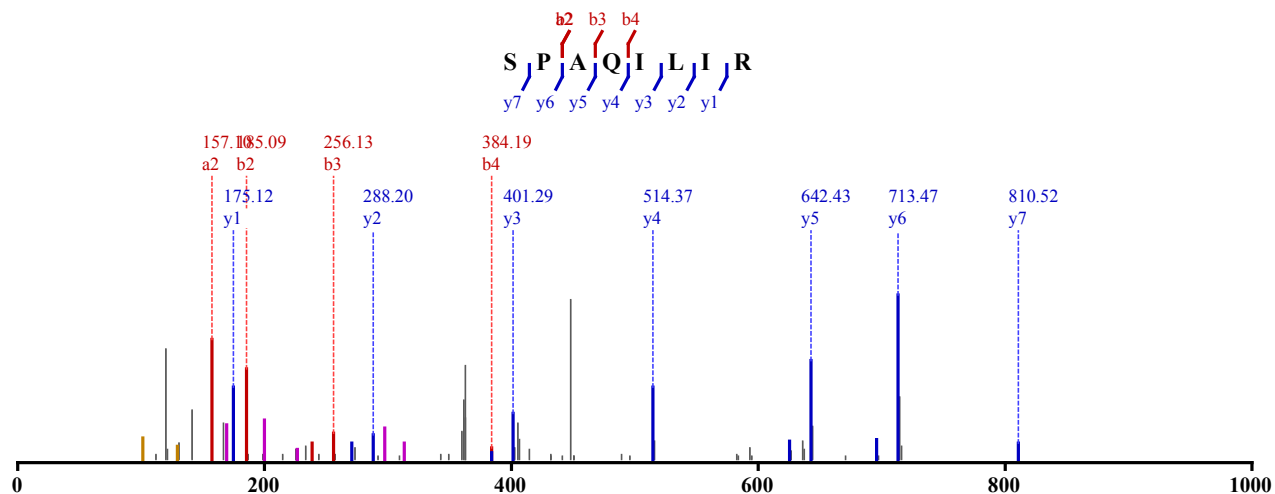

Not Modified

Identified in MSS487 with qvalue 0.00

Charge: 2, Exp. m/z: 449.279, Calc. m/z: 449.280

Data File: HeLa\_ArgC-Try\_pH8\_HCD\_3, Scans: 27839 - 27839

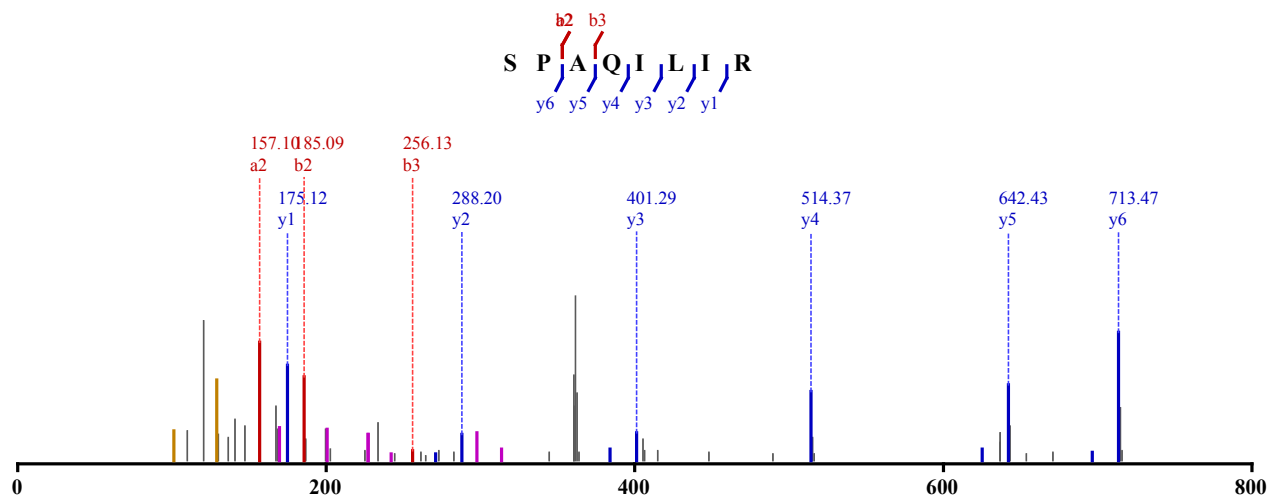

Not Modified

Identified in MSS487 with qvalue 0.00

Charge: 2, Exp. m/z: 449.279, Calc. m/z: 449.280



Data File: HeLa\_ArgC-Try\_pH8\_HCD\_3, Scans: 27926 - 27926

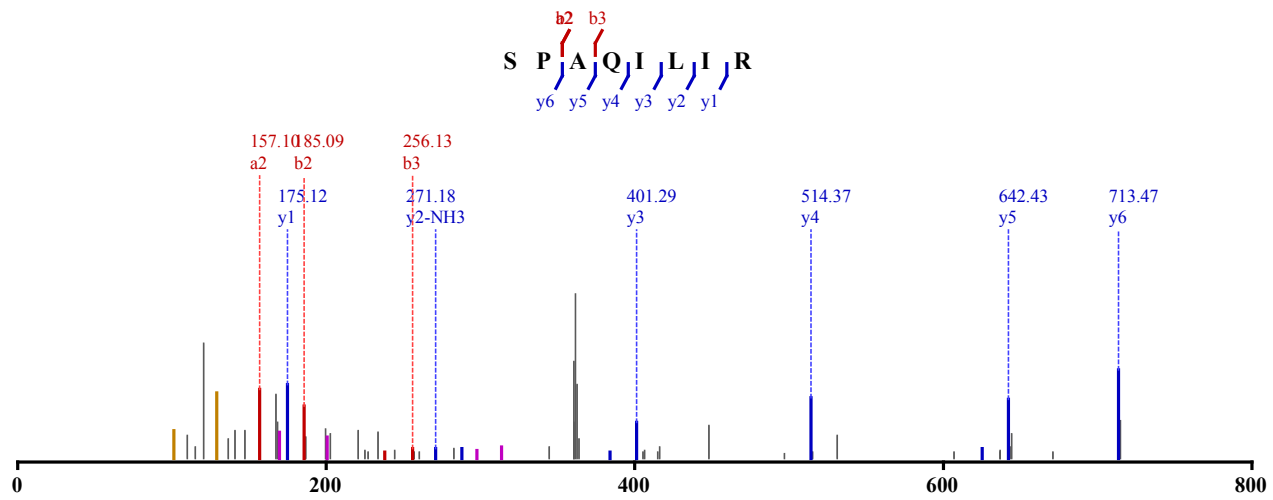

Not Modified

Identified in MSS487 with qvalue 0.00

Charge: 2, Exp. m/z: 450.282, Calc. m/z: 449.279

Data File: HeLa\_ArgC-Try\_pH11\_HCD\_3, Scans: 33043 - 33043

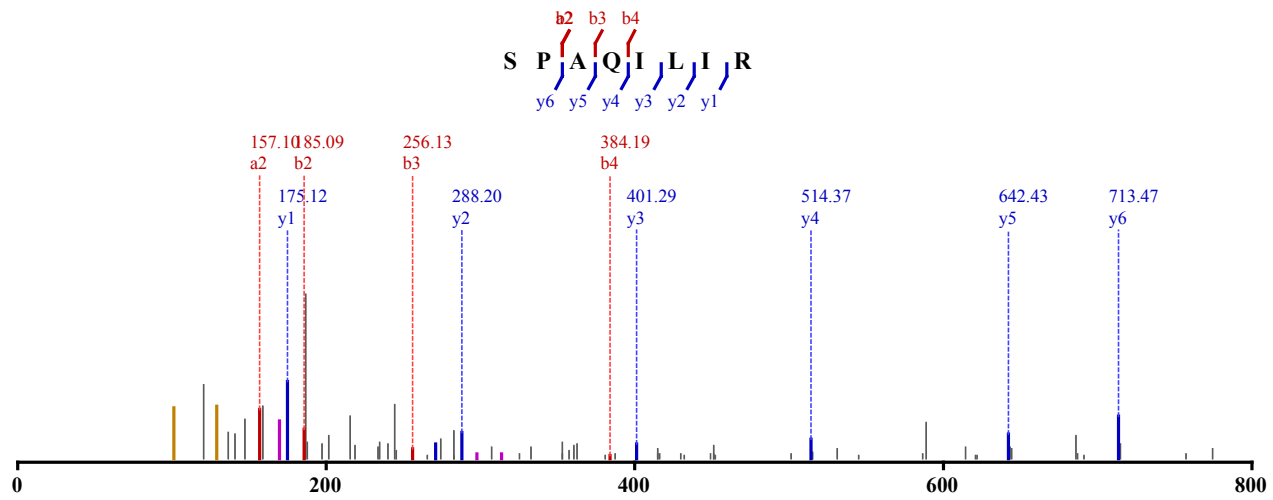

Not Modified

Identified in MSS488 with qvalue 0.00

Charge: 2, Exp. m/z: 449.279, Calc. m/z: 449.280

Data File: HeLa\_chy-try\_pH11\_CID\_3xload\_2, Scans: 21395 - 21395

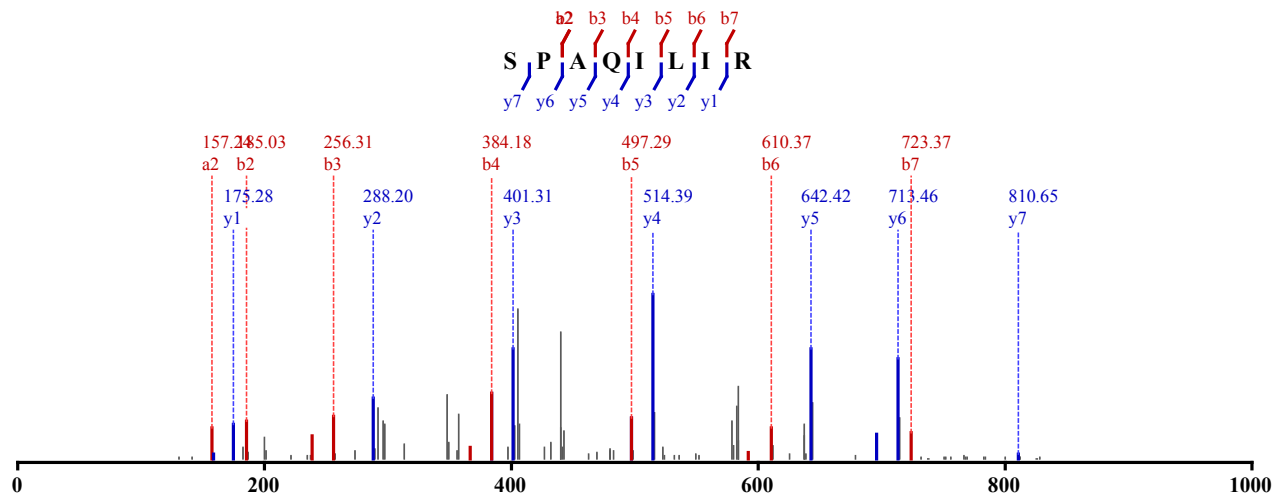

Not Modified

Identified in MSS488 with qvalue 0.00

Charge: 2, Exp. m/z: 449.279, Calc. m/z: 449.280

Data File: HeLa\_chy-try\_pH11\_CID\_3xload\_2, Scans: 21477 - 21477

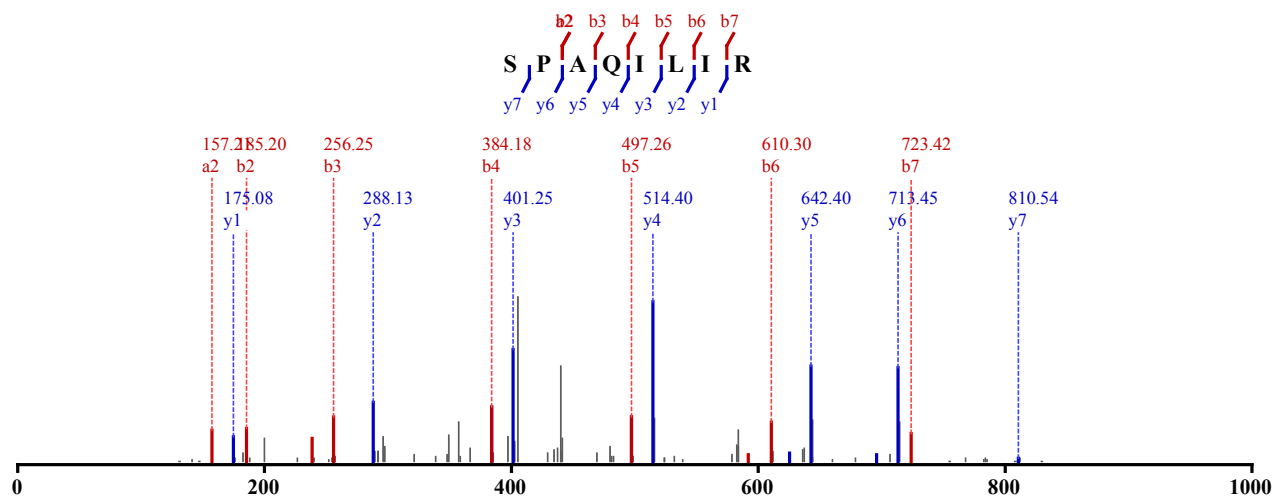

Not Modified

Identified in MSS488 with qvalue 0.00

Charge: 2, Exp. m/z: 449.279, Calc. m/z: 449.280

Data File: HeLa\_chy-try\_pH11\_CID\_3xload\_2, Scans: 21564 - 21564

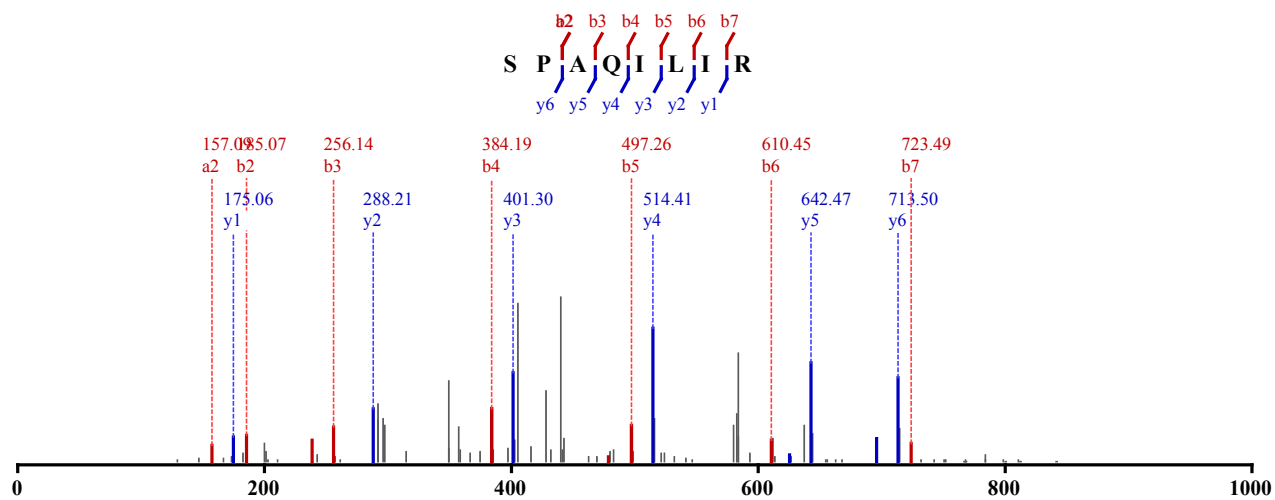

Not Modified

Identified in MSS488 with qvalue 0.00

Charge: 2, Exp. m/z: 449.280, Calc. m/z: 449.280

Data File: HeLa\_chy-try\_pH11\_CID\_3xload\_3, Scans: 38466 - 38466

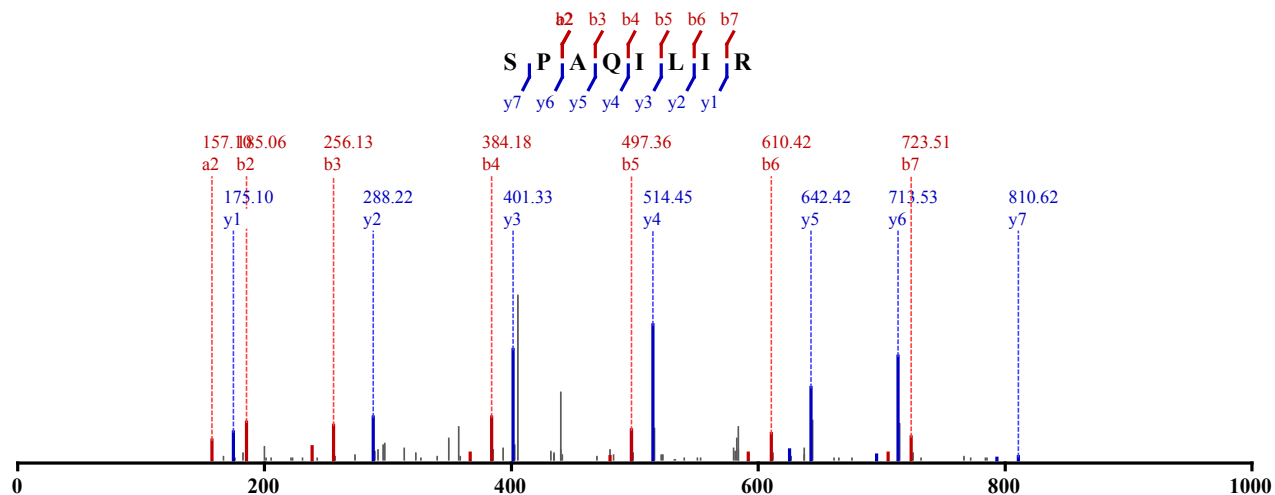

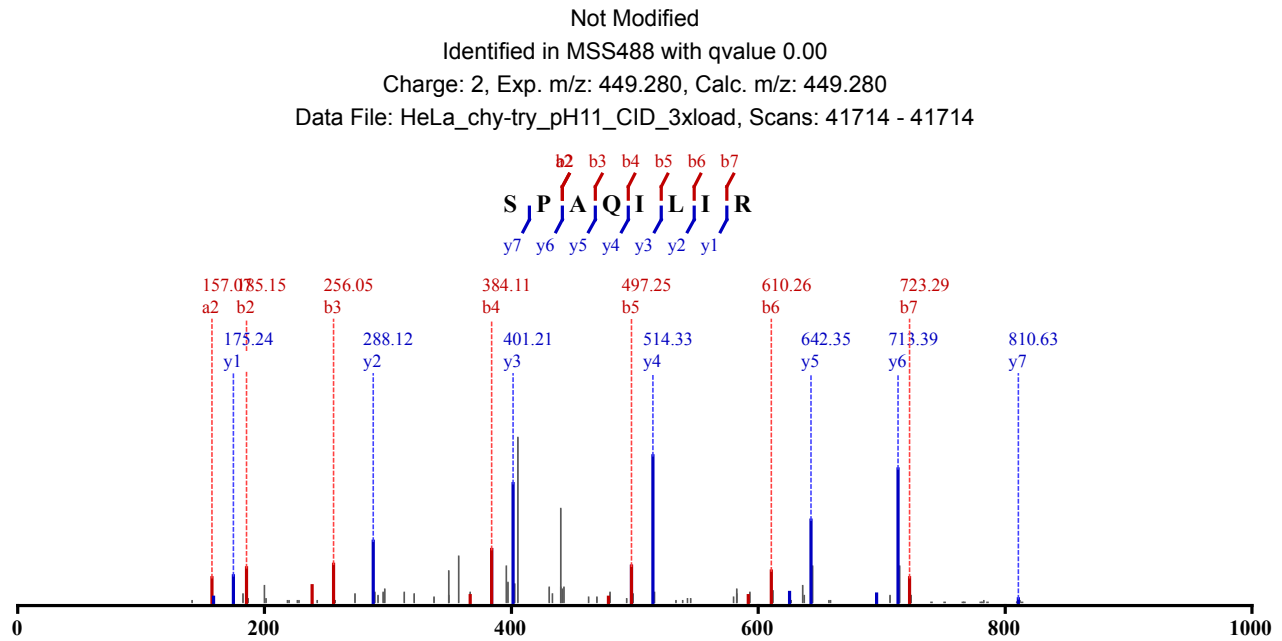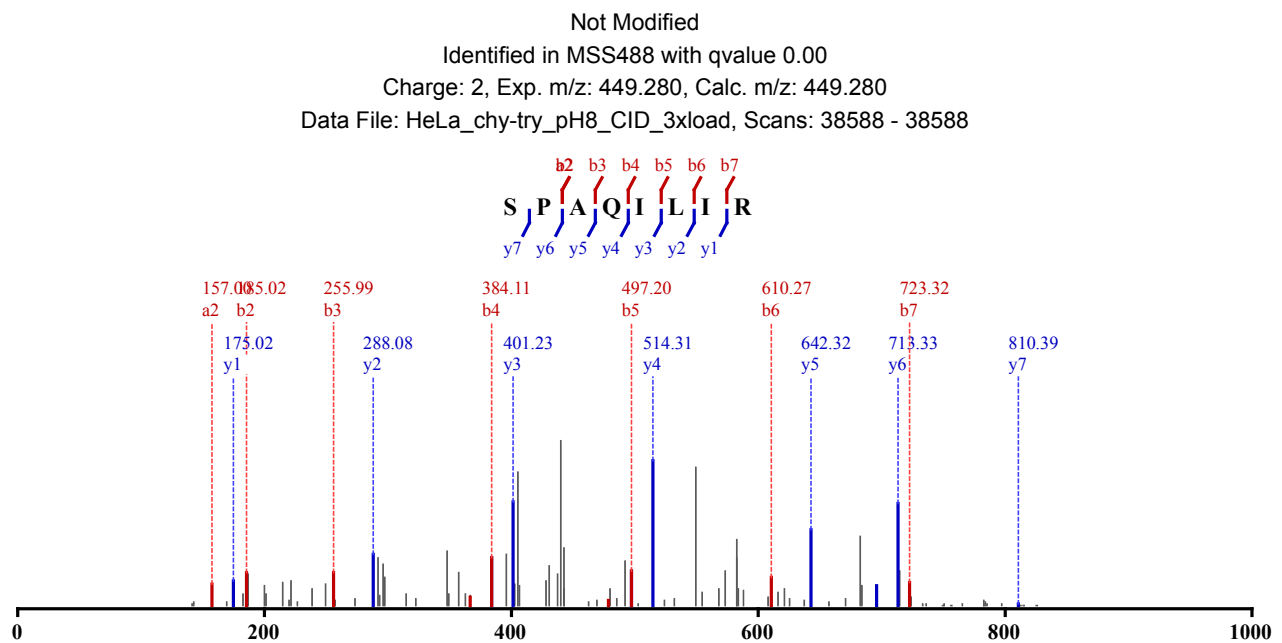

Not Modified  
Identified in MSS488 with qvalue 0.00  
Charge: 2, Exp. m/z: 449.279, Calc. m/z: 449.279  
Data File: HeLa\_chy-try\_pH11\_CID\_3xload\_3, Scans: 38384 - 38384

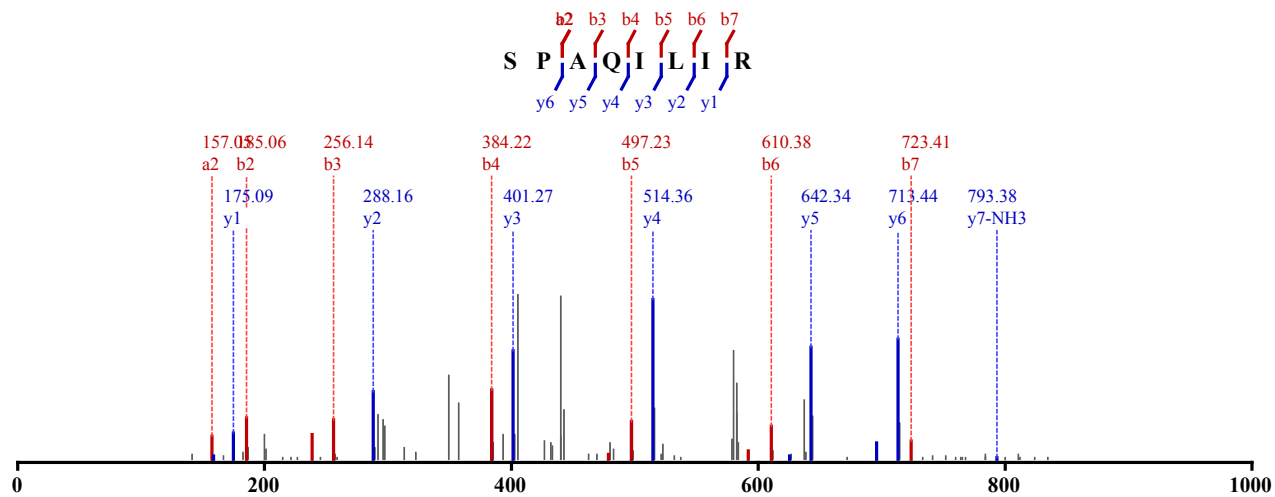

Not Modified

Identified in MSS488 with qvalue 0.00

Charge: 2, Exp. m/z: 449.279, Calc. m/z: 449.279

Data File: HeLa\_chy-try\_pH11\_CID\_3xload, Scans: 41608 - 41608

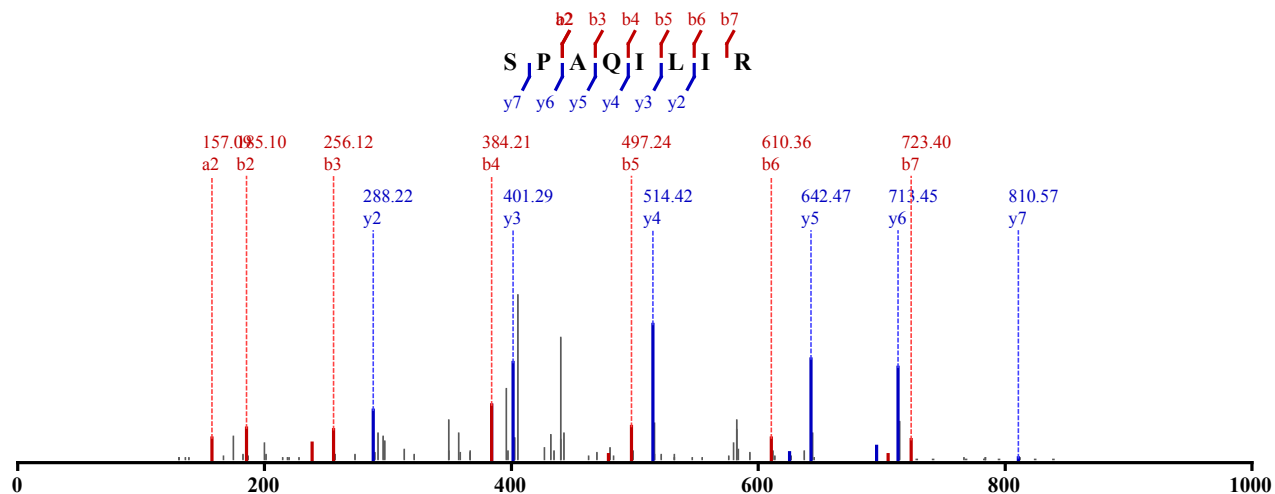

Not Modified

Identified in MSS483 with qvalue 0.00

Charge: 2, Exp. m/z: 566.225, Calc. m/z: 566.227

Data File: HeLa\_AspN\_pH3\_CID\_3xload\_2, Scans: 7087 - 7087

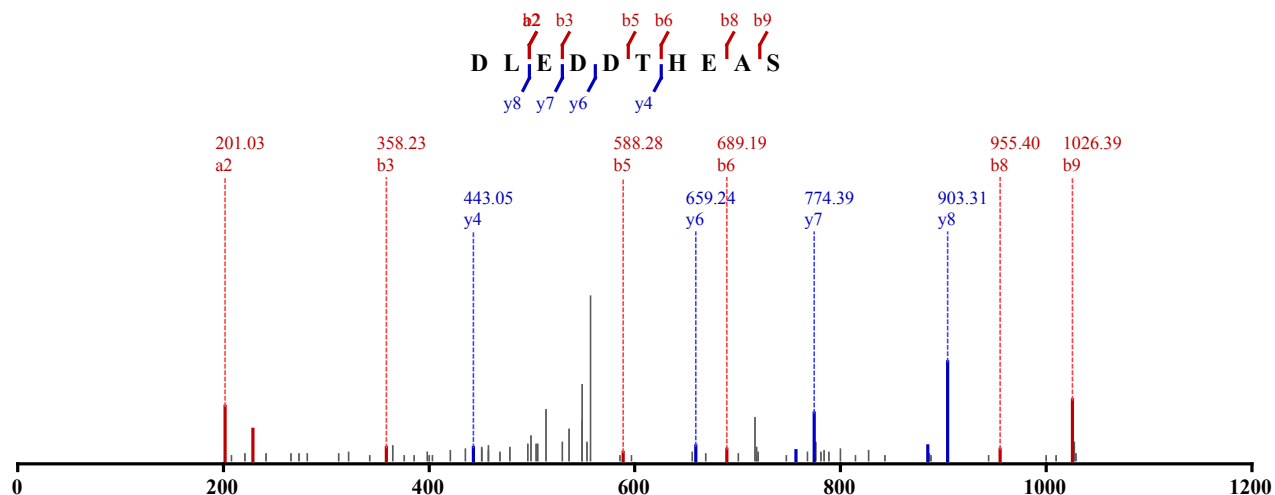

Not Modified

Identified in MSS30 with qvalue 0.00

Charge: 2, Exp. m/z: 689.847, Calc. m/z: 689.847

Data File: 20101224\_Velos1\_TaGe\_SA\_HeLa\_05, Scans: 10953 - 10953

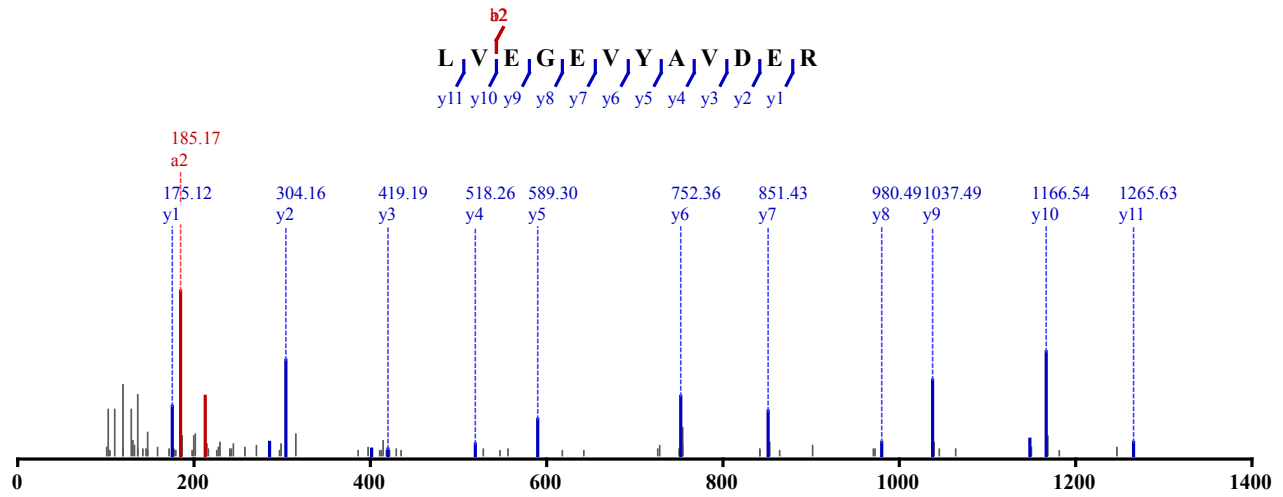

Not Modified

Identified in MSS480 with qvalue 0.00

Charge: 2, Exp. m/z: 689.846, Calc. m/z: 689.847

Data File: HeLa\_try\_pH3\_CID\_3xload\_3, Scans: 20642 - 20642

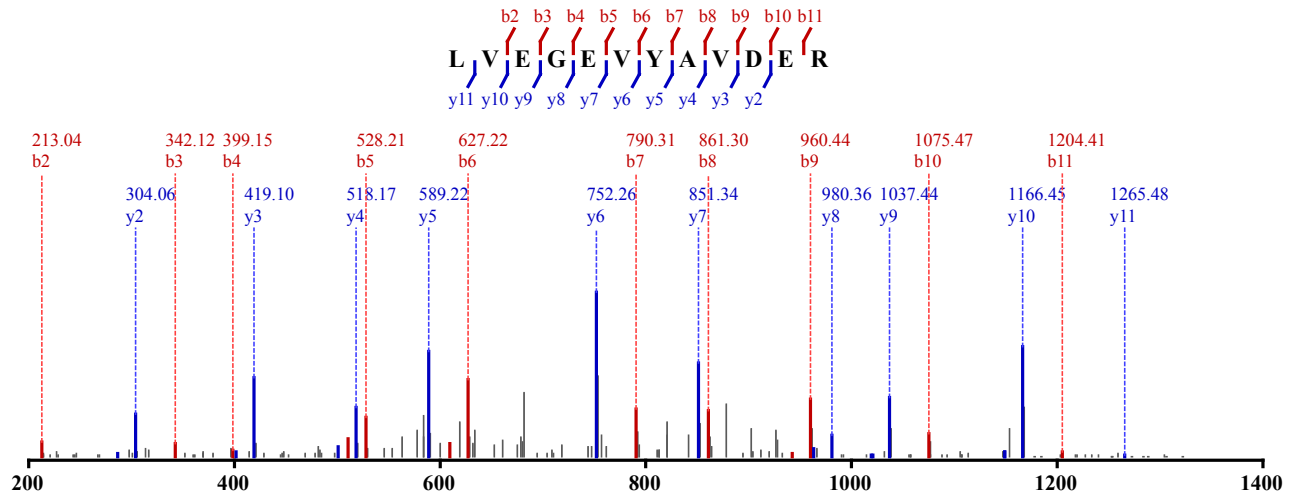

Not Modified

Identified in MSS480 with qvalue 0.00

Charge: 2, Exp. m/z: 689.847, Calc. m/z: 689.847

Data File: HeLa\_try\_pH3\_CID\_3xload, Scans: 18240 - 18240

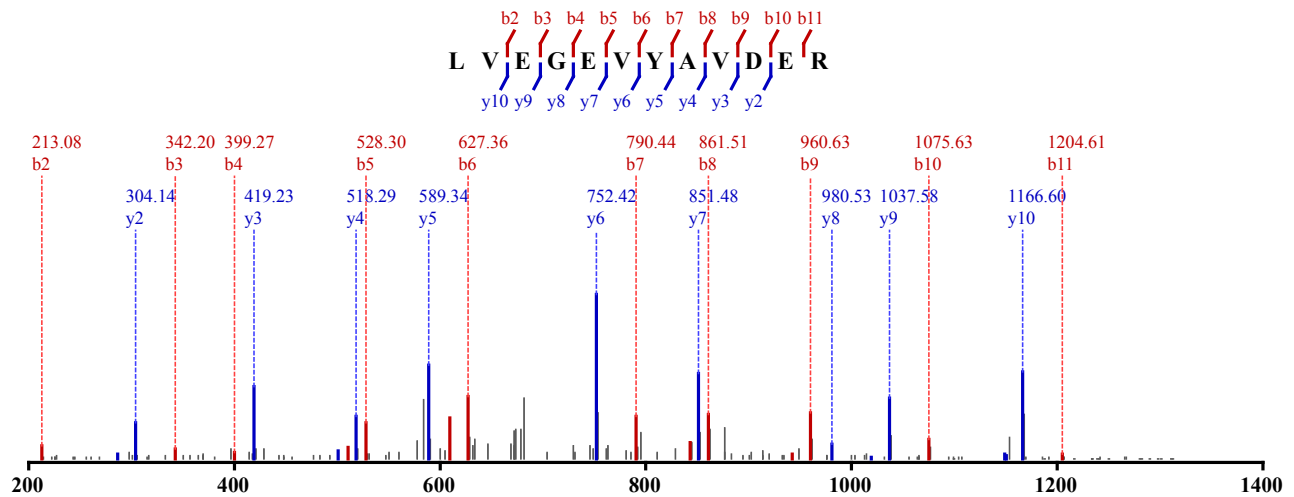

Not Modified

Identified in MSS484 with qvalue 0.00  
 Charge: 2, Exp. m/z: 689.848, Calc. m/z: 689.847  
 Data File: HeLa\_Try\_pH3\_HCD\_3, Scans: 27655 - 27655

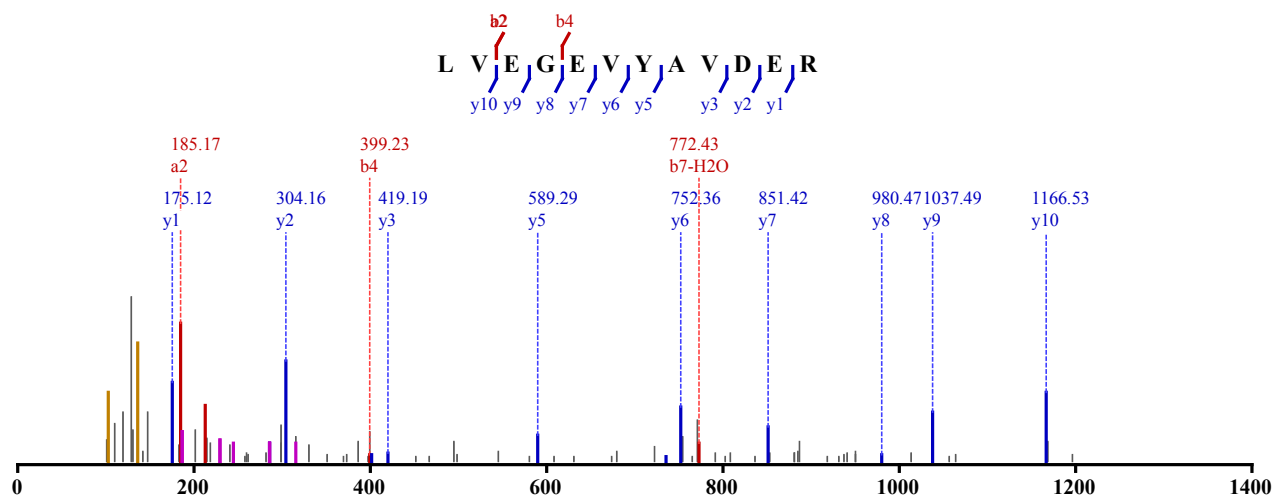

Not Modified  
 Identified in MSS484 with qvalue 0.00  
 Charge: 2, Exp. m/z: 689.846, Calc. m/z: 689.847  
 Data File: HeLa\_Try\_pH2\_HCD\_1, Scans: 24530 - 24530

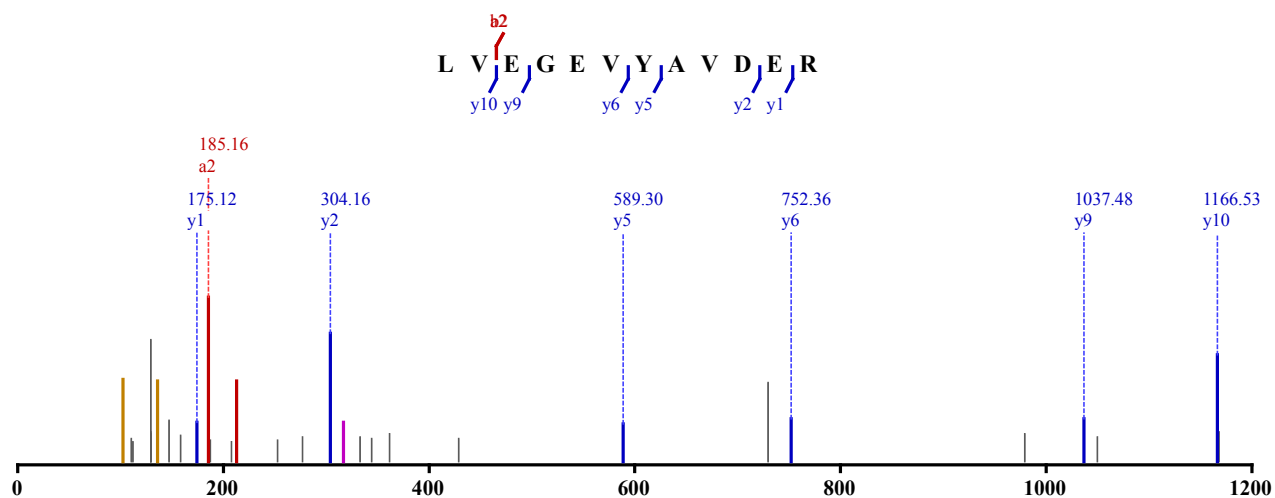

Not Modified  
 Identified in MSS484 with qvalue 0.00  
 Charge: 2, Exp. m/z: 689.847, Calc. m/z: 689.847  
 Data File: HeLa\_Try\_pH3\_HCD\_1, Scans: 28035 - 28035

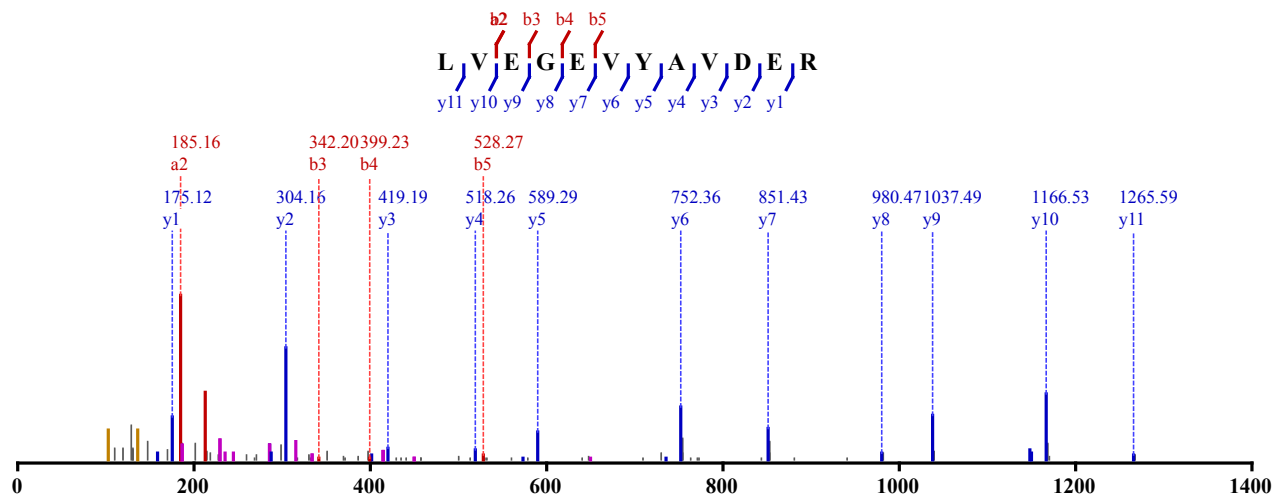

Not Modified  
 Identified in MSS484 with qvalue 0.00  
 Charge: 2, Exp. m/z: 689.846, Calc. m/z: 689.847  
 Data File: HeLa\_Try\_pH3\_HCD\_2, Scans: 28087 - 28087

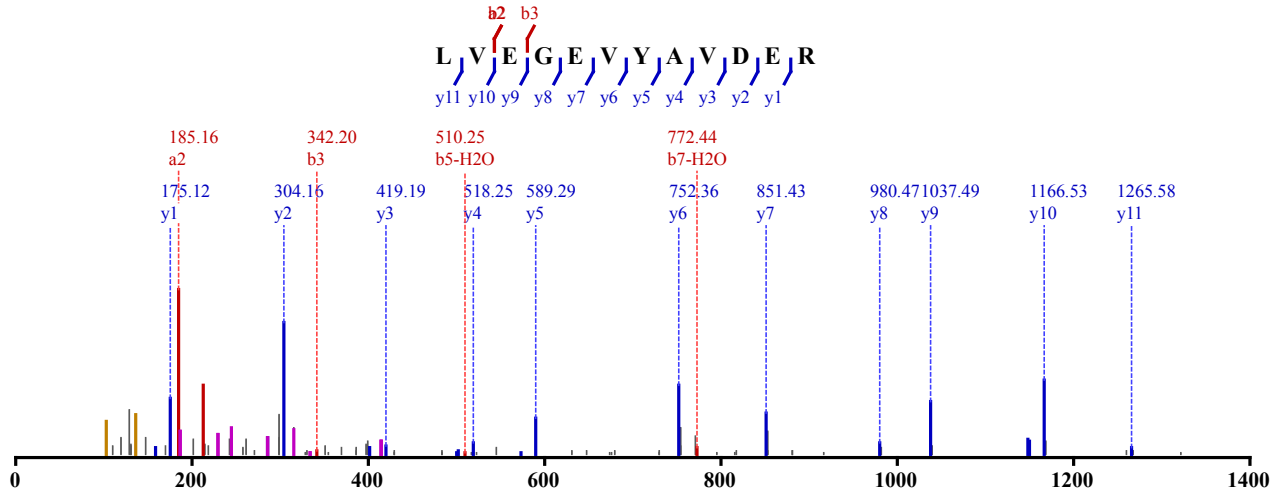

Not Modified  
 Identified in MSS481 with qvalue 0.01  
 Charge: 3, Exp. m/z: 405.881, Calc. m/z: 406.227  
 Data File: HeLa\_LysC\_pH11\_CID\_3xload\_3, Scans: 34557 - 34557

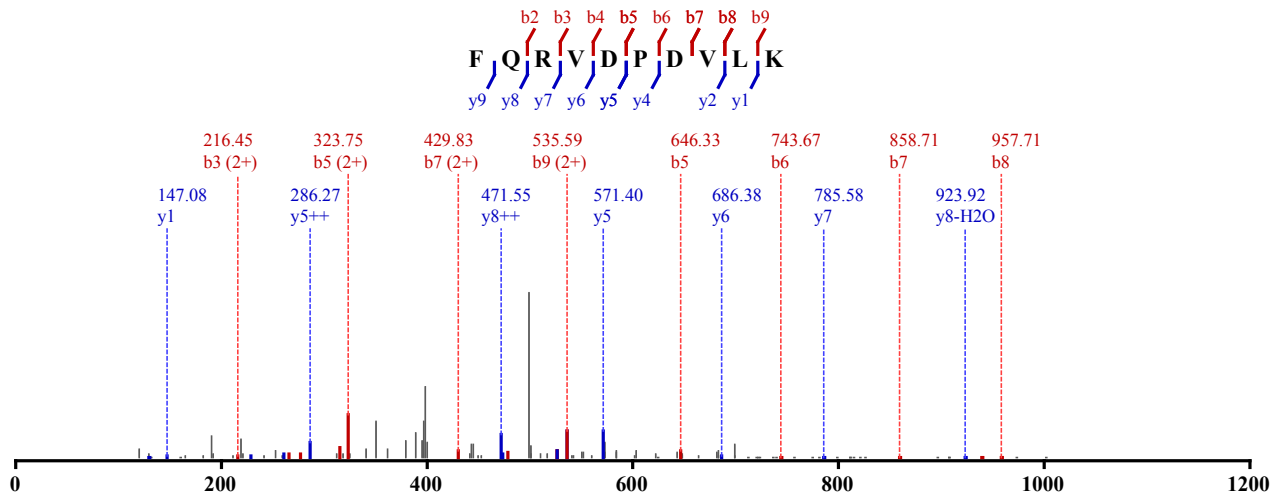

Not Modified  
 Identified in MSS481 with qvalue 0.00  
 Charge: 3, Exp. m/z: 406.241, Calc. m/z: 406.227  
 Data File: HeLa\_LysC\_pH11\_CID\_3xload, Scans: 28045 - 28045

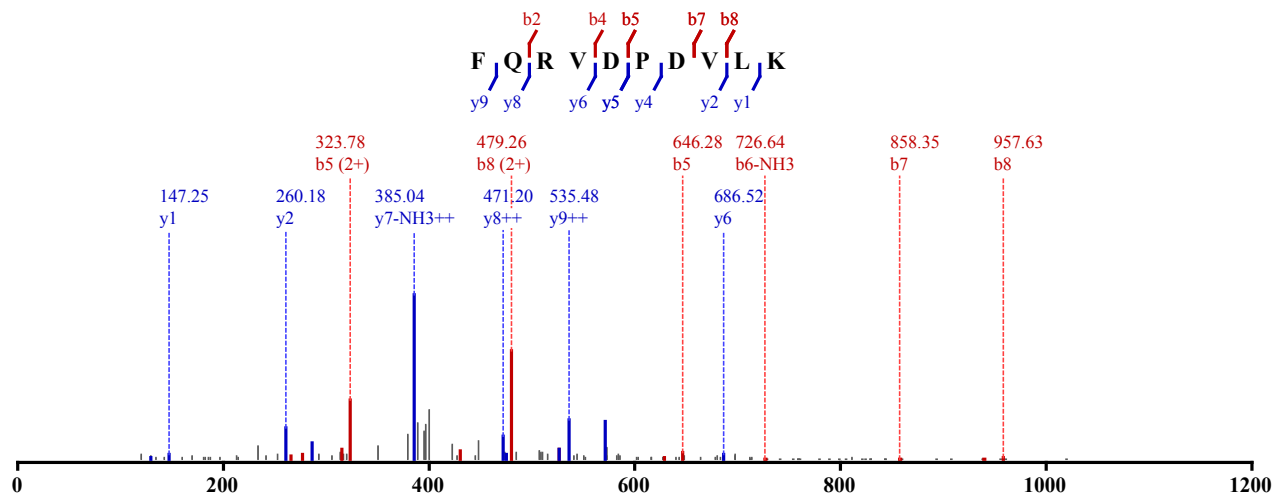

Not Modified  
 Identified in MSS481 with qvalue 0.00  
 Charge: 3, Exp. m/z: 406.241, Calc. m/z: 406.227  
 Data File: HeLa\_LysC\_pH8\_CID\_3xload, Scans: 24938 - 24938

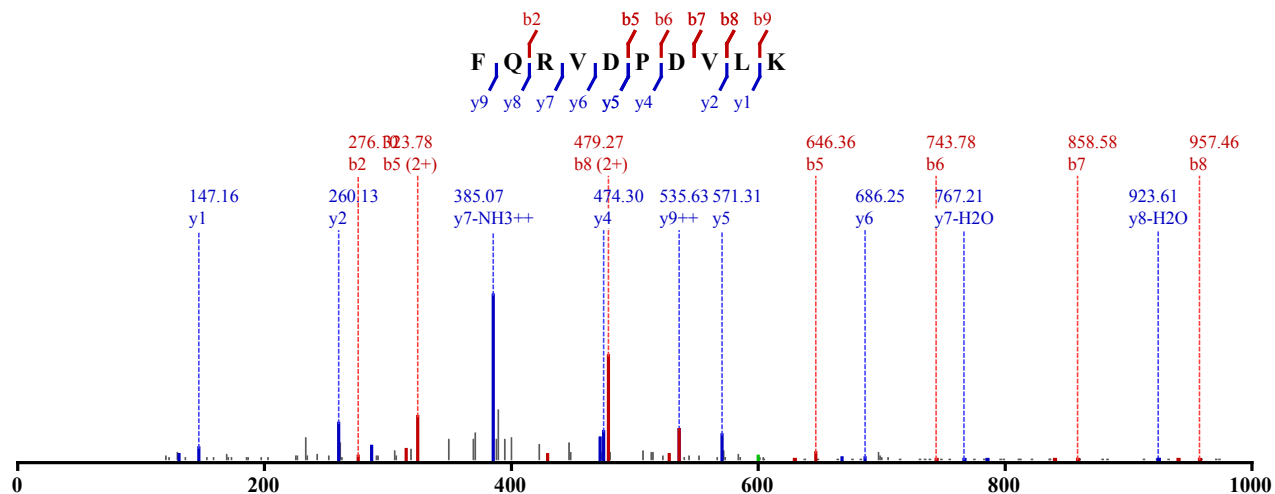

Not Modified  
 Identified in MSS485 with qvalue 0.00  
 Charge: 3, Exp. m/z: 406.228, Calc. m/z: 406.227  
 Data File: HeLa\_LysC\_pH11\_HCD\_3, Scans: 31583 - 31583

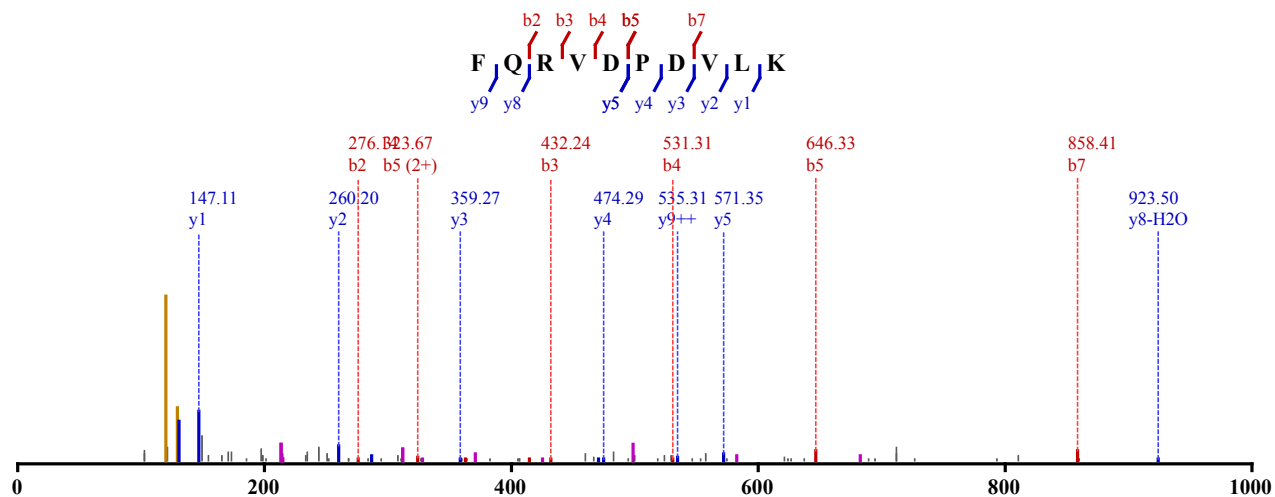

Not Modified  
 Identified in MSS485 with qvalue 0.00  
 Charge: 3, Exp. m/z: 406.228, Calc. m/z: 406.227



Data File: HeLa\_LysC\_pH11\_HCD\_2, Scans: 32337 - 32337

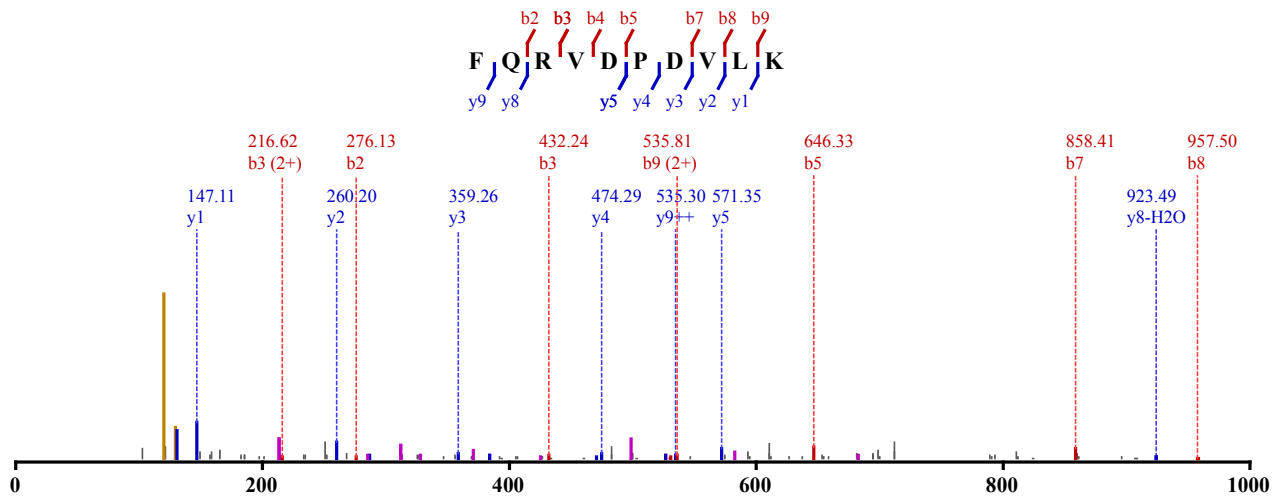

Not Modified

Identified in MSS485 with qvalue 0.00

Charge: 3, Exp. m/z: 406.227, Calc. m/z: 406.227

Data File: HeLa\_LysC\_pH8\_HCD\_2, Scans: 29010 - 29010

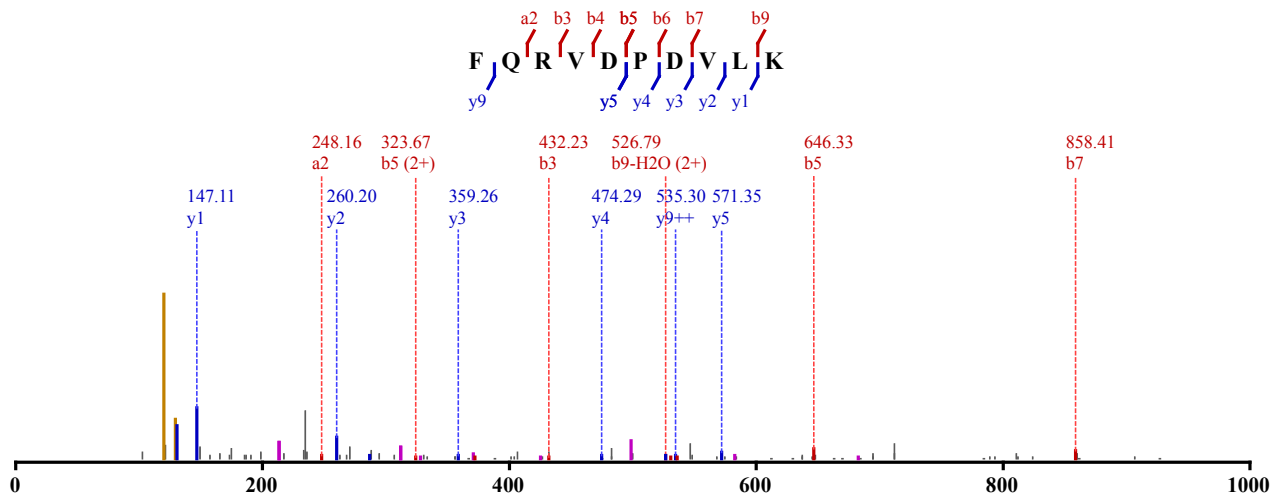

Not Modified

Identified in MSS485 with qvalue 0.00

Charge: 3, Exp. m/z: 406.227, Calc. m/z: 406.227

Data File: HeLa\_LysC\_pH8\_HCD\_3, Scans: 28835 - 28835

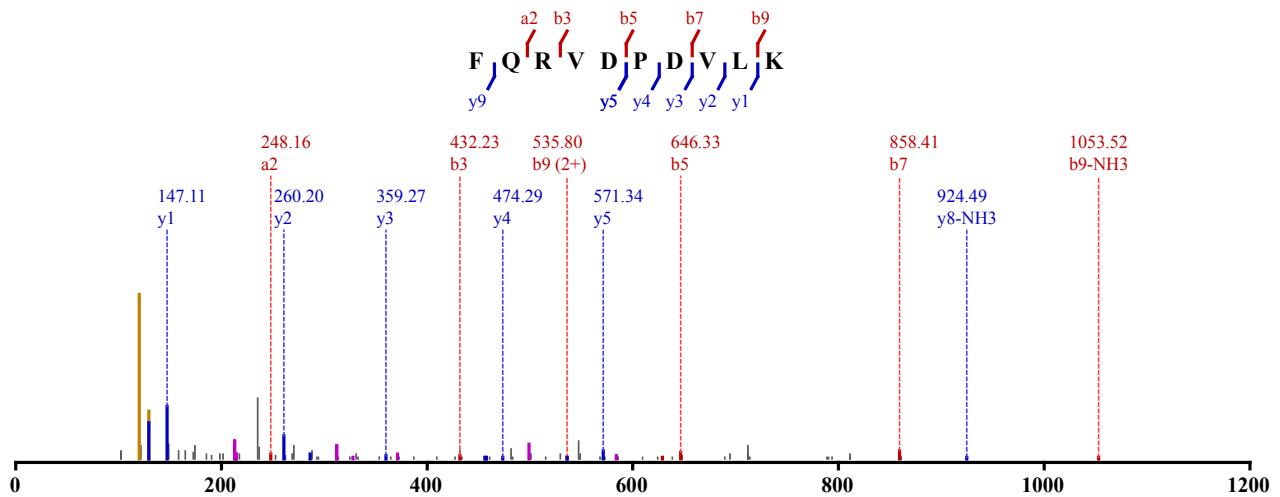

Not Modified

Identified in MSS480 with qvalue 0.00  
 Charge: 3, Exp. m/z: 654.698, Calc. m/z: 654.697  
 Data File: HeLa\_try\_pH5\_CID\_3xload\_3, Scans: 39465 - 39465

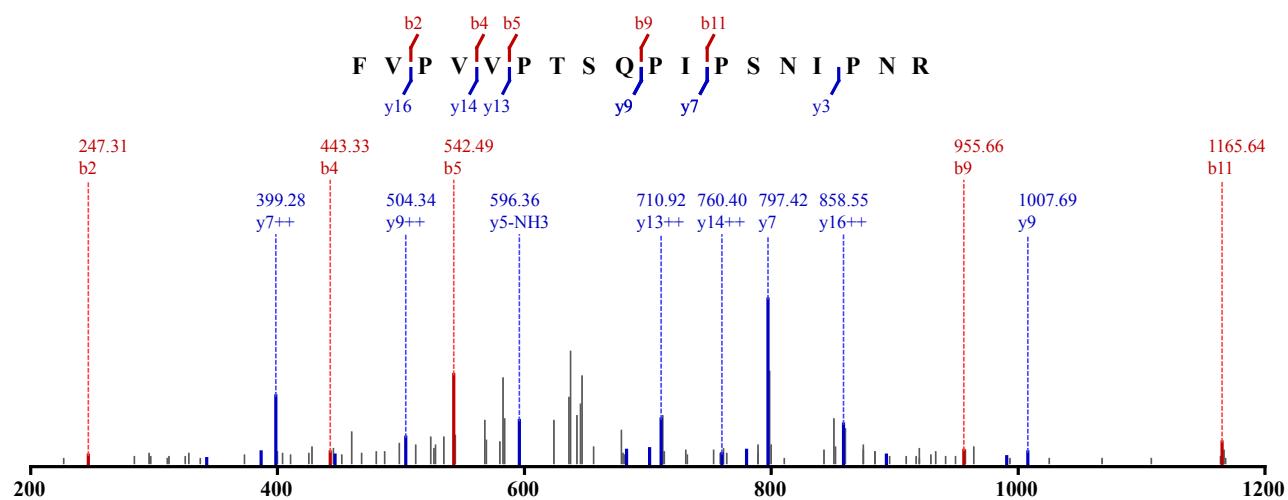

Not Modified  
 Identified in MSS480 with qvalue 0.00  
 Charge: 3, Exp. m/z: 654.698, Calc. m/z: 654.697  
 Data File: HeLa\_try\_pH6\_CID\_3xload\_2, Scans: 44316 - 44316

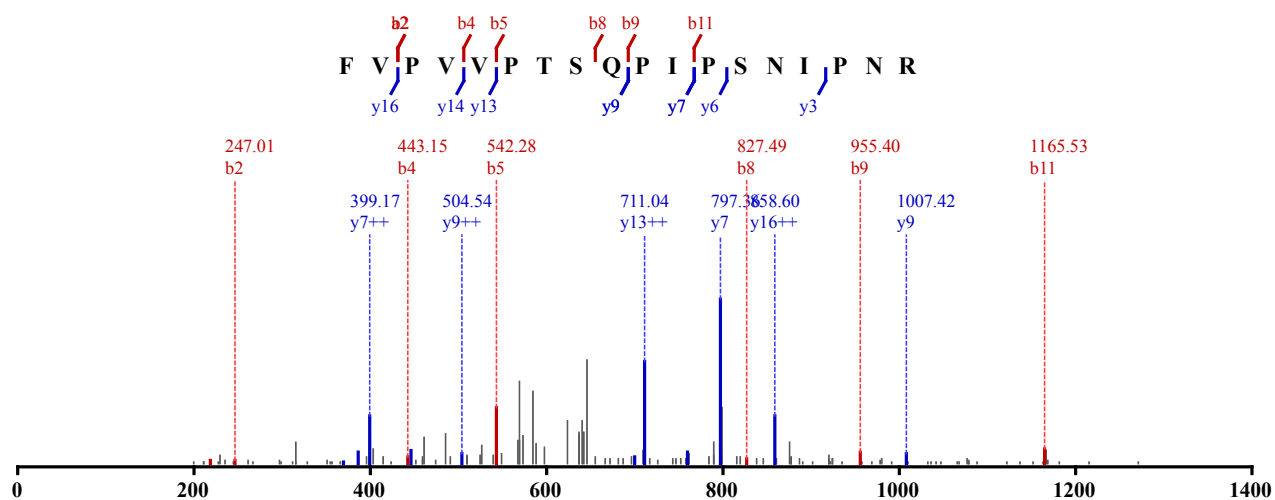

Not Modified  
 Identified in MSS480 with qvalue 0.00  
 Charge: 3, Exp. m/z: 654.699, Calc. m/z: 654.697  
 Data File: HeLa\_try\_pH6\_CID\_3xload\_2, Scans: 44382 - 44382

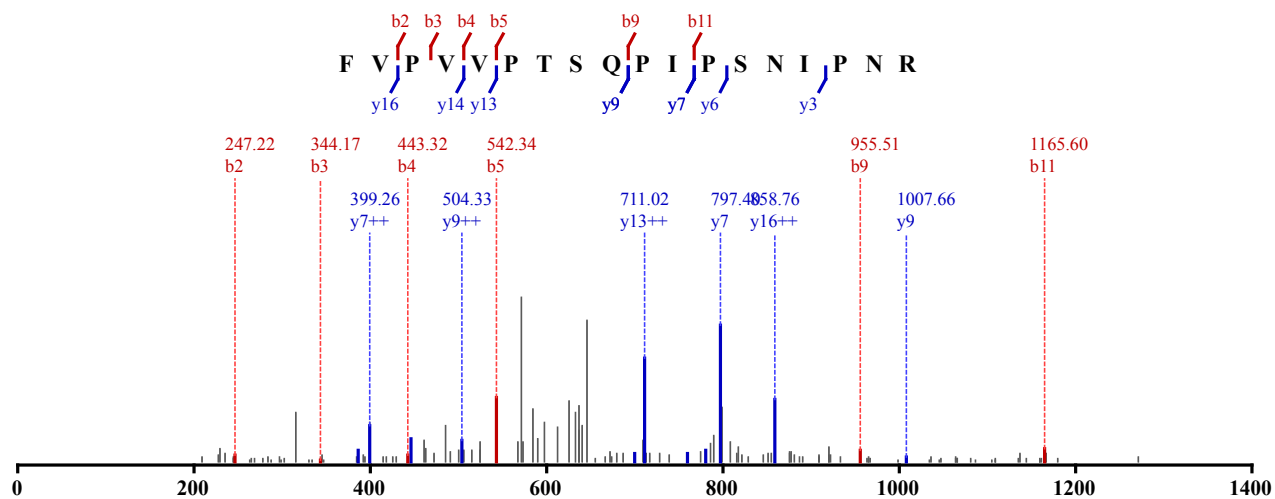

Not Modified

Identified in MSS480 with qvalue 0.00

Charge: 3, Exp. m/z: 654.698, Calc. m/z: 654.697

Data File: HeLa\_try\_pH6\_CID\_3xload\_3, Scans: 46087 - 46087

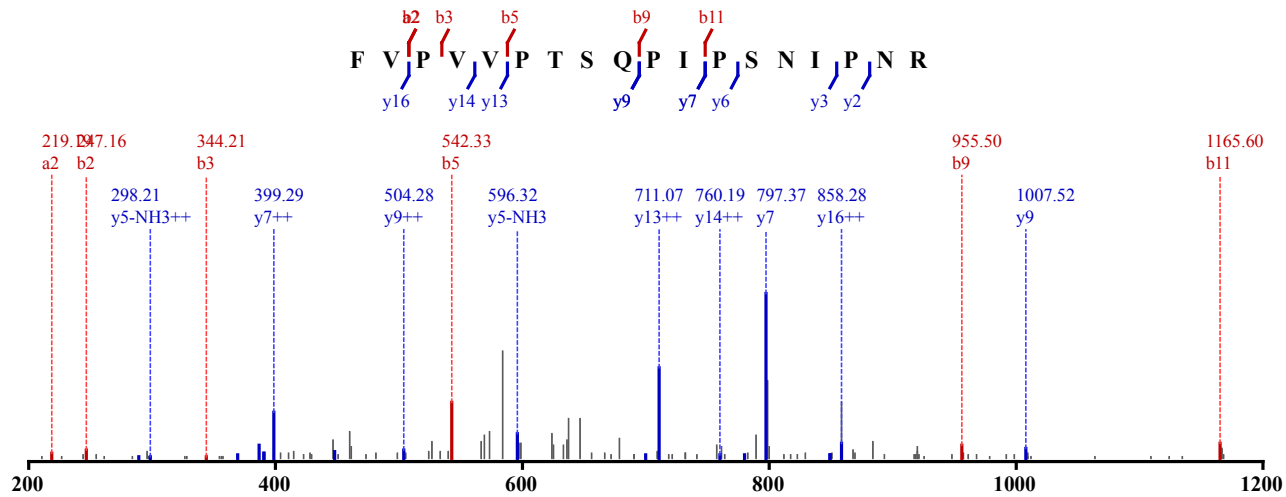

Not Modified

Identified in MSS480 with qvalue 0.00

Charge: 3, Exp. m/z: 654.699, Calc. m/z: 654.697

Data File: HeLa\_try\_pH6\_CID\_3xload\_3, Scans: 46162 - 46162

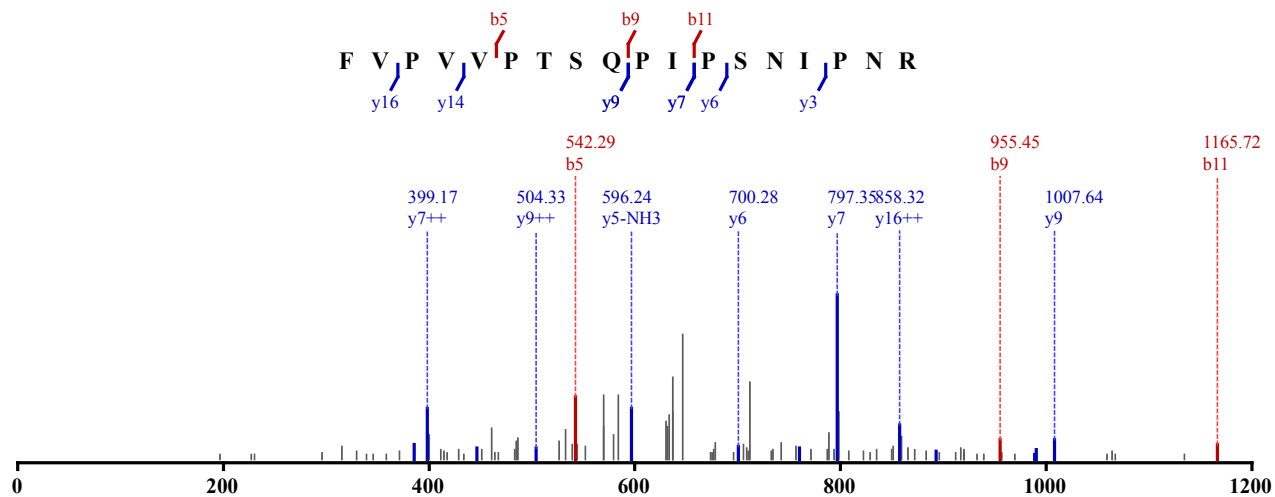

Not Modified

Identified in MSS480 with qvalue 0.00

Charge: 2, Exp. m/z: 981.545, Calc. m/z: 981.542

Data File: HeLa\_try\_pH6\_CID\_3xload, Scans: 42425 - 42425

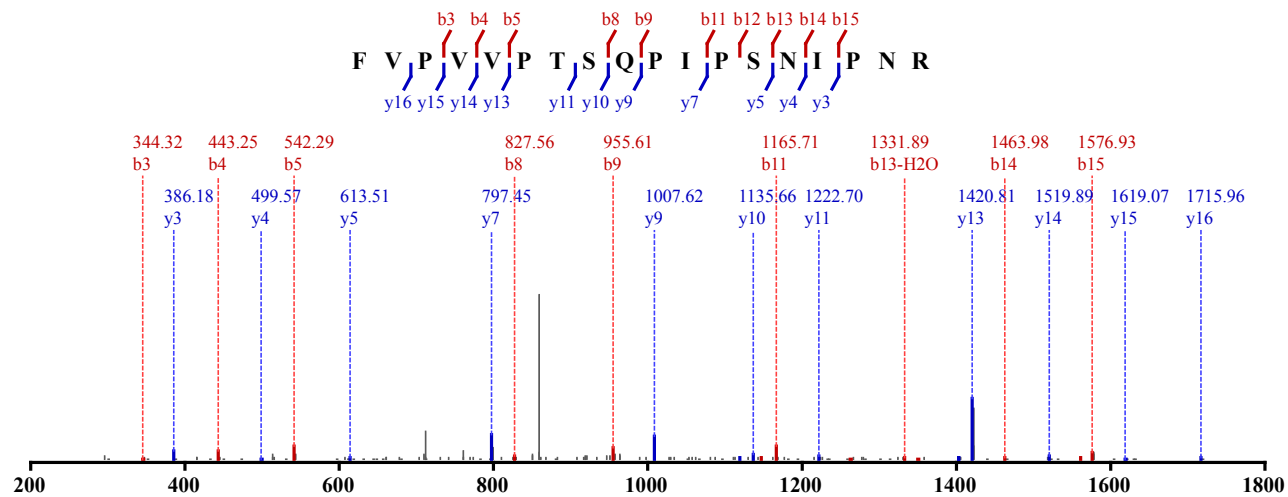

Not Modified

Identified in MSS484 with qvalue 0.00

Charge: 2, Exp. m/z: 981.545, Calc. m/z: 981.542

Data File: HeLa\_Try\_pH6\_HCD\_1, Scans: 52208 - 52208

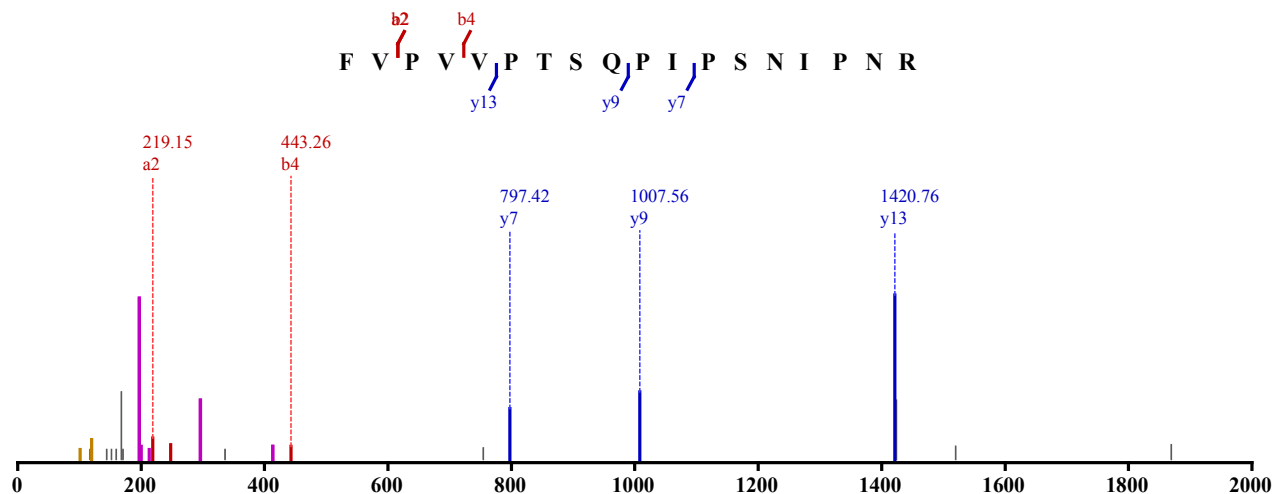

Not Modified

Identified in MSS479 with qvalue 0.00

Charge: 3, Exp. m/z: 539.617, Calc. m/z: 539.617

Data File: HeLa\_AspN\_pH11\_HCD\_1, Scans: 41862 - 41862

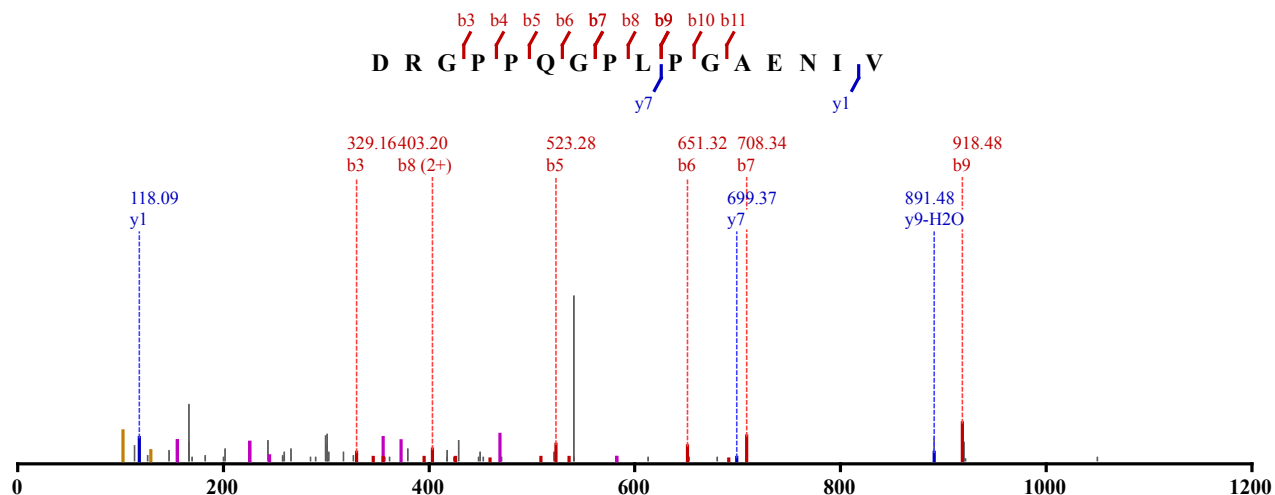

Not Modified

Identified in MSS479 with qvalue 0.00

Charge: 3, Exp. m/z: 539.619, Calc. m/z: 539.617

Data File: HeLa\_AspN\_pH11\_HCD\_3, Scans: 40078 - 40078

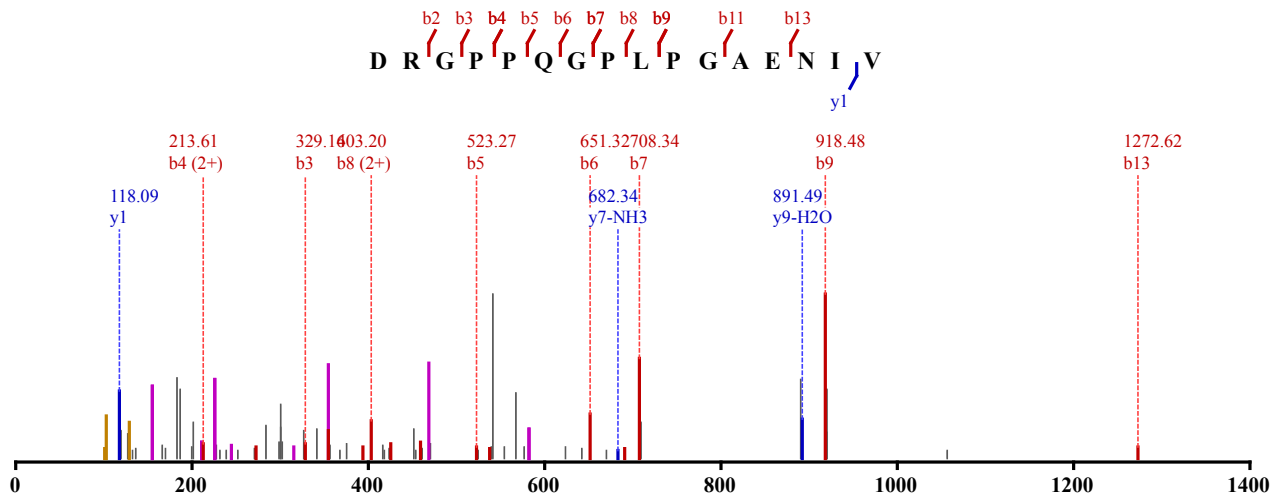

Not Modified

Identified in MSS479 with qvalue 0.00

Charge: 2, Exp. m/z: 808.924, Calc. m/z: 808.922

Data File: HeLa\_AspN\_pH11\_HCD\_2, Scans: 40891 - 40891

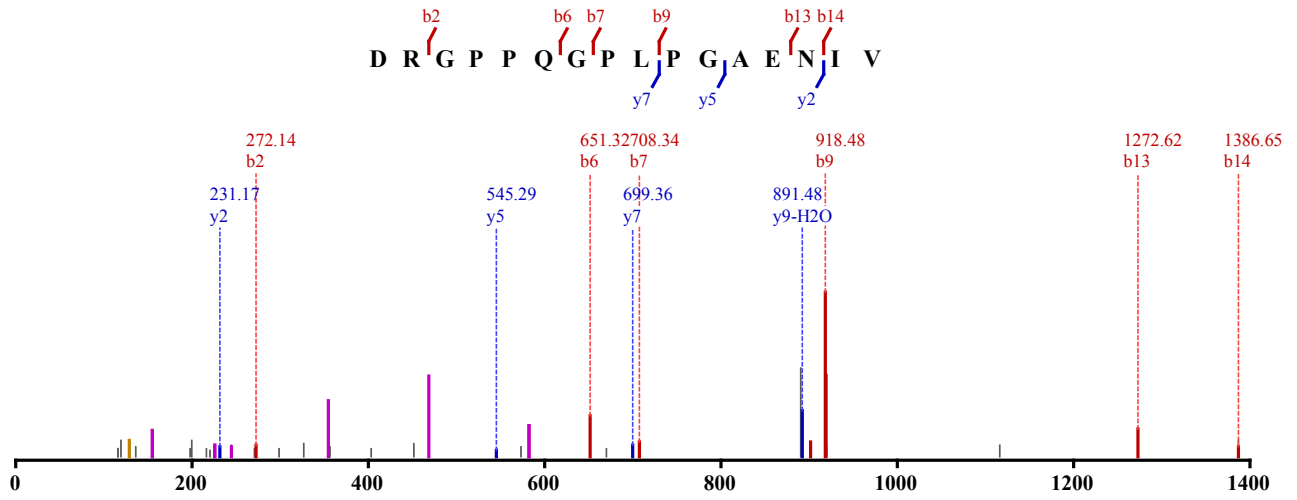

Not Modified

Identified in MSS479 with qvalue 0.00

Charge: 2, Exp. m/z: 808.922, Calc. m/z: 808.922

Data File: HeLa\_AspN\_pH11\_HCD\_1, Scans: 41923 - 41923

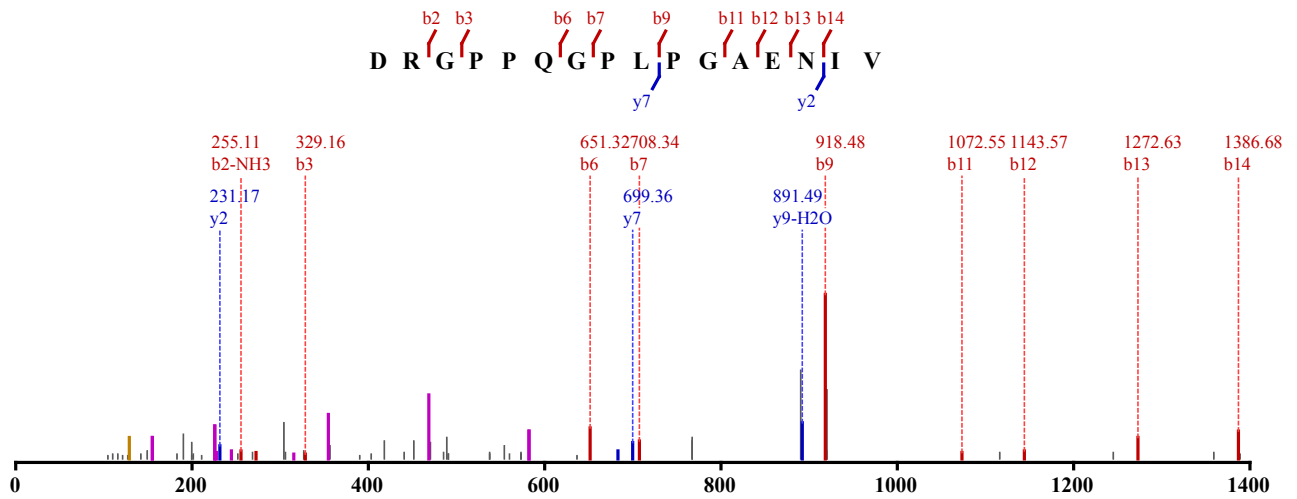

Not Modified

Identified in MSS479 with qvalue 0.00  
 Charge: 2, Exp. m/z: 808.921, Calc. m/z: 808.922  
 Data File: HeLa\_AspN\_pH11\_HCD\_2, Scans: 40815 - 40815

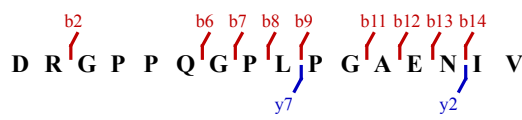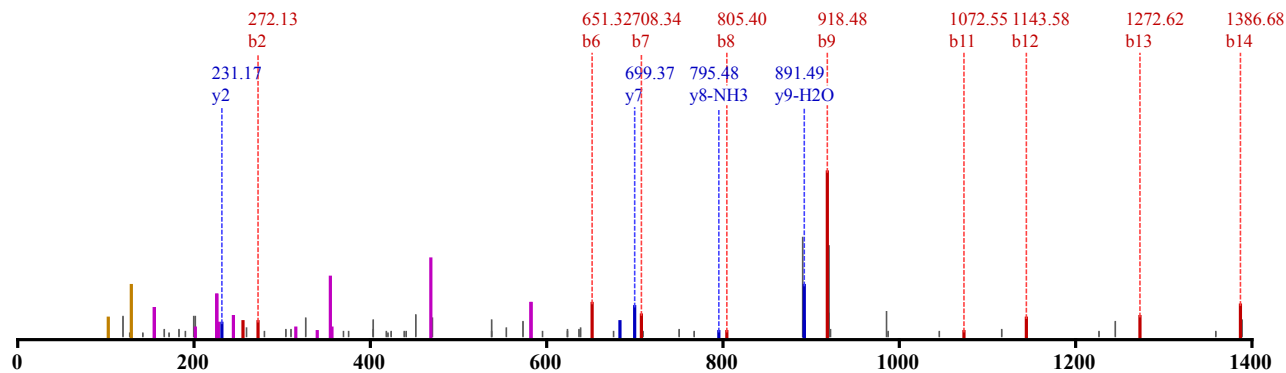

Not Modified

Identified in MSS479 with qvalue 0.00  
 Charge: 3, Exp. m/z: 539.618, Calc. m/z: 539.617  
 Data File: HeLa\_AspN\_pH11\_HCD\_2, Scans: 40833 - 40833

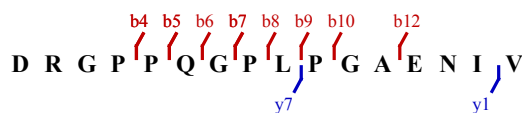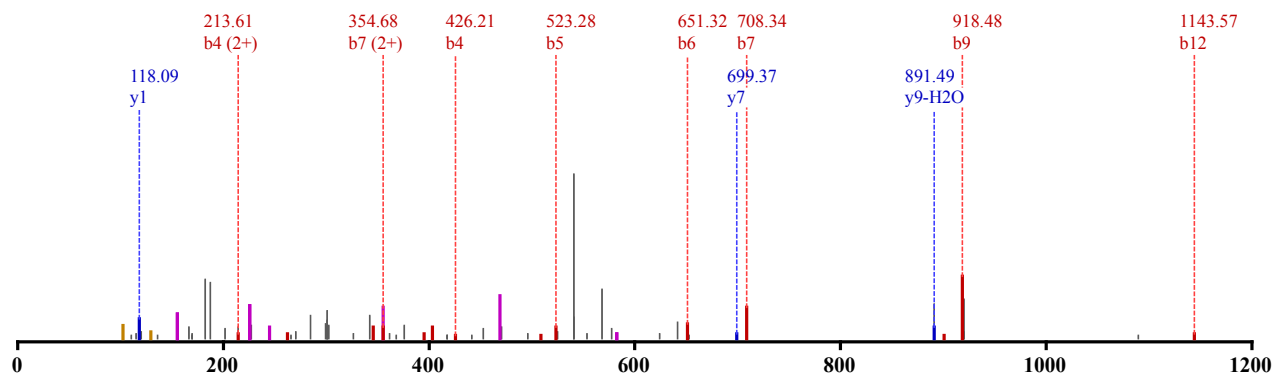

Not Modified

Identified in MSS479 with qvalue 0.00  
 Charge: 2, Exp. m/z: 808.924, Calc. m/z: 808.922  
 Data File: HeLa\_AspN\_pH11\_HCD\_3, Scans: 40074 - 40074

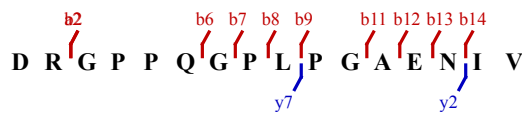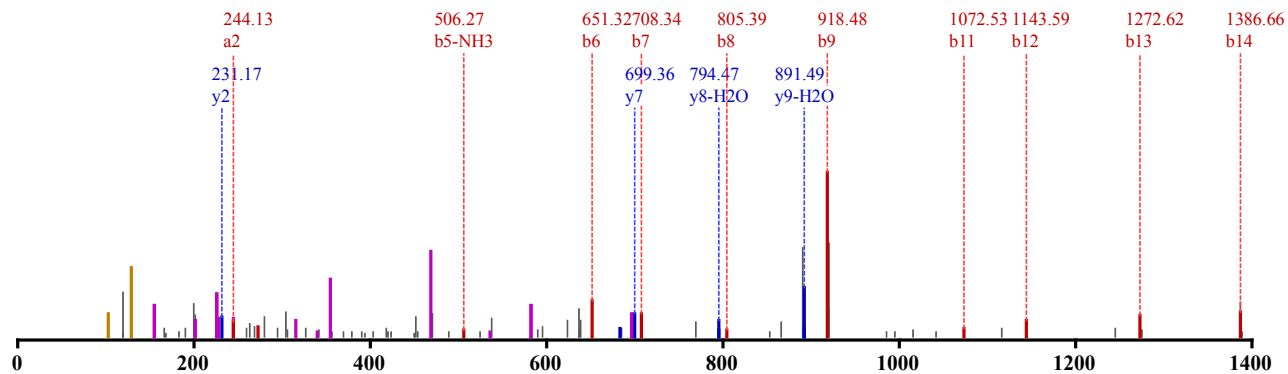

Not Modified  
 Identified in MSS479 with qvalue 0.00  
 Charge: 2, Exp. m/z: 808.923, Calc. m/z: 808.922  
 Data File: HeLa\_AspN\_pH11\_HCD\_3, Scans: 40154 - 40154

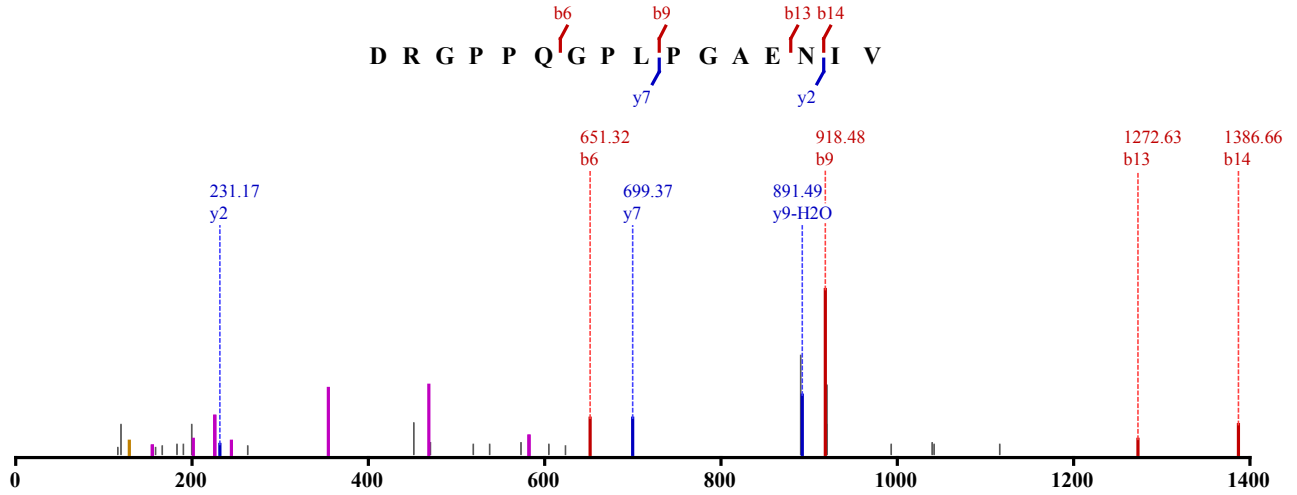

Not Modified  
 Identified in MSS483 with qvalue 0.00  
 Charge: 2, Exp. m/z: 808.923, Calc. m/z: 808.922  
 Data File: HeLa\_AspN\_pH11\_CID\_3xload\_2, Scans: 32822 - 32822

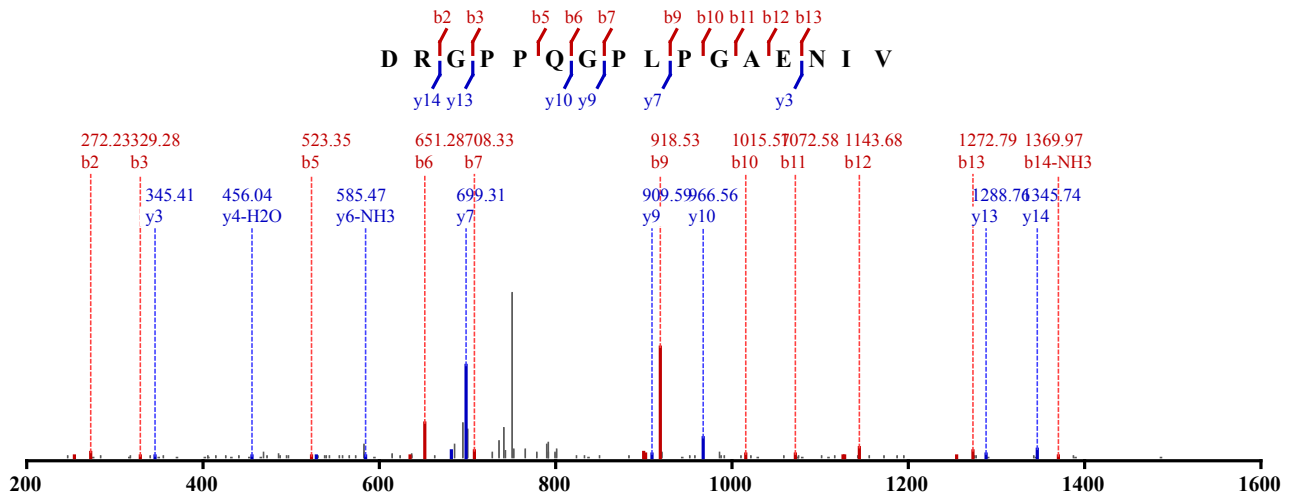

Not Modified  
 Identified in MSS483 with qvalue 0.00  
 Charge: 3, Exp. m/z: 539.618, Calc. m/z: 539.617  
 Data File: HeLa\_AspN\_pH11\_CID\_3xload\_2, Scans: 32845 - 32845

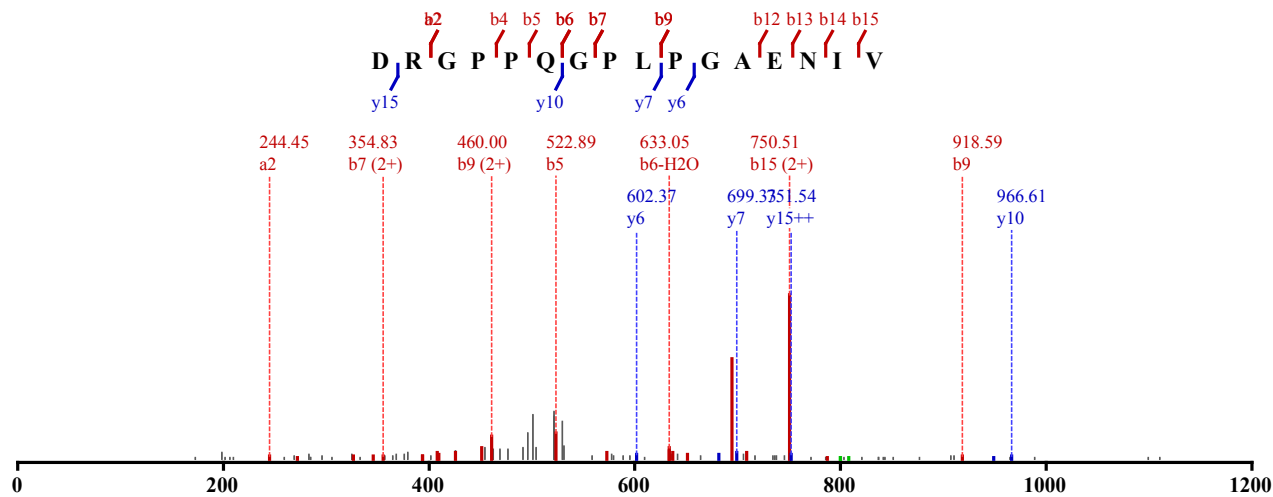

Not Modified

Identified in MSS483 with qvalue 0.00

Charge: 2, Exp. m/z: 808.924, Calc. m/z: 808.922

Data File: HeLa\_AspN\_pH11\_CID\_3xload\_2, Scans: 32882 - 32882

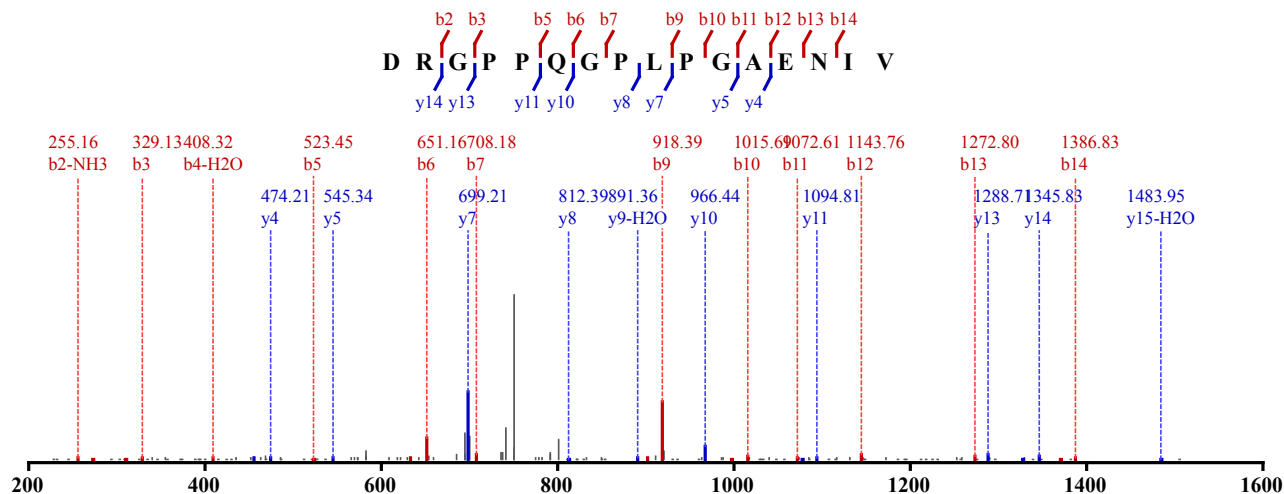

Not Modified

Identified in MSS483 with qvalue 0.00

Charge: 2, Exp. m/z: 808.924, Calc. m/z: 808.922

Data File: HeLa\_AspN\_pH11\_CID\_3xload, Scans: 32896 - 32896

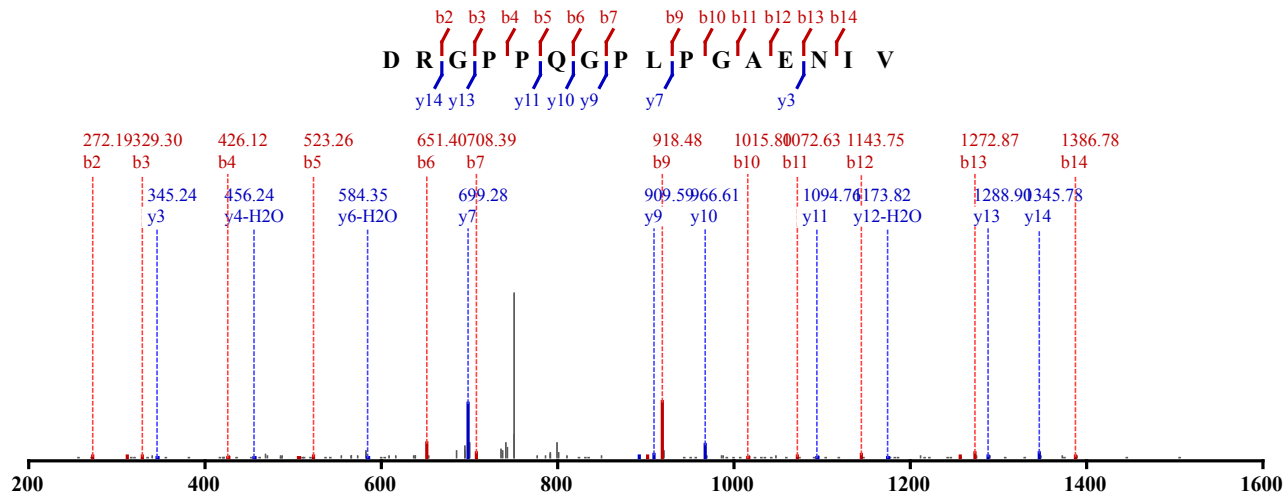

Not Modified

Identified in MSS483 with qvalue 0.00

Charge: 2, Exp. m/z: 808.924, Calc. m/z: 808.922



Data File: HeLa\_AspN\_pH11\_CID\_3xload, Scans: 32960 - 32960

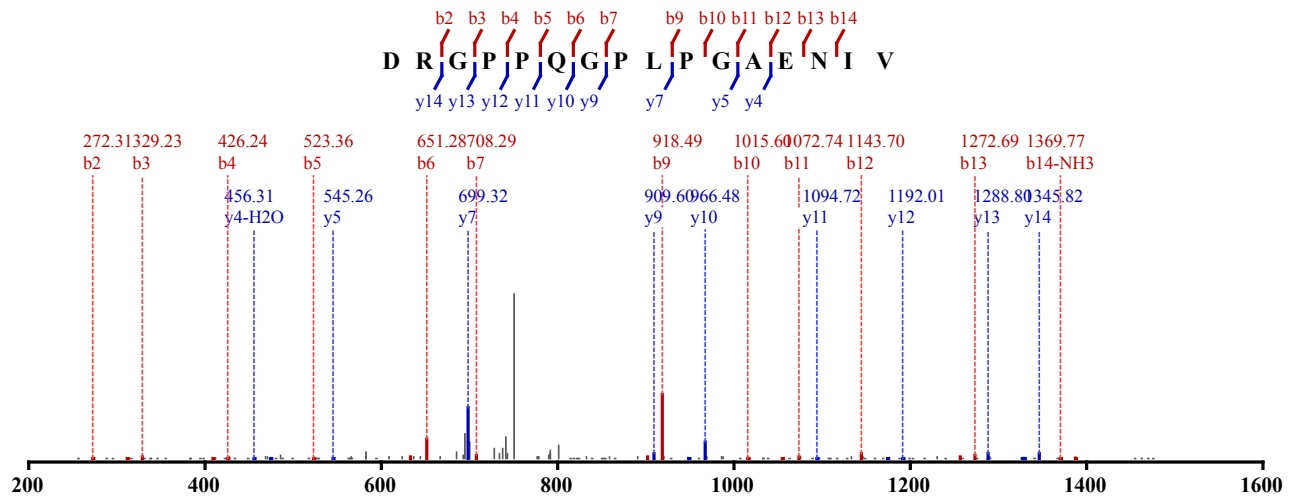

Not Modified

Identified in MSS134 with qvalue 0.00

Charge: 2, Exp. m/z: 614.302, Calc. m/z: 614.297

Data File: HeLa\_GluC-try\_HCD\_2, Scans: 47384 - 47384

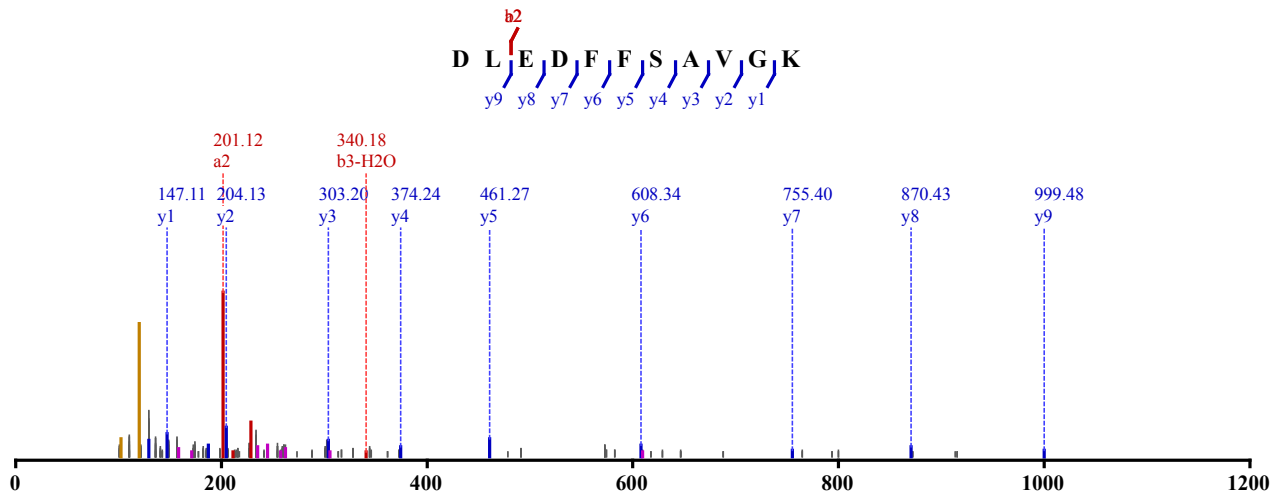

Not Modified

Identified in MSS480 with qvalue 0.00

Charge: 2, Exp. m/z: 614.299, Calc. m/z: 614.297

Data File: HeLa\_try\_pH2\_CID\_3xload, Scans: 34905 - 34905

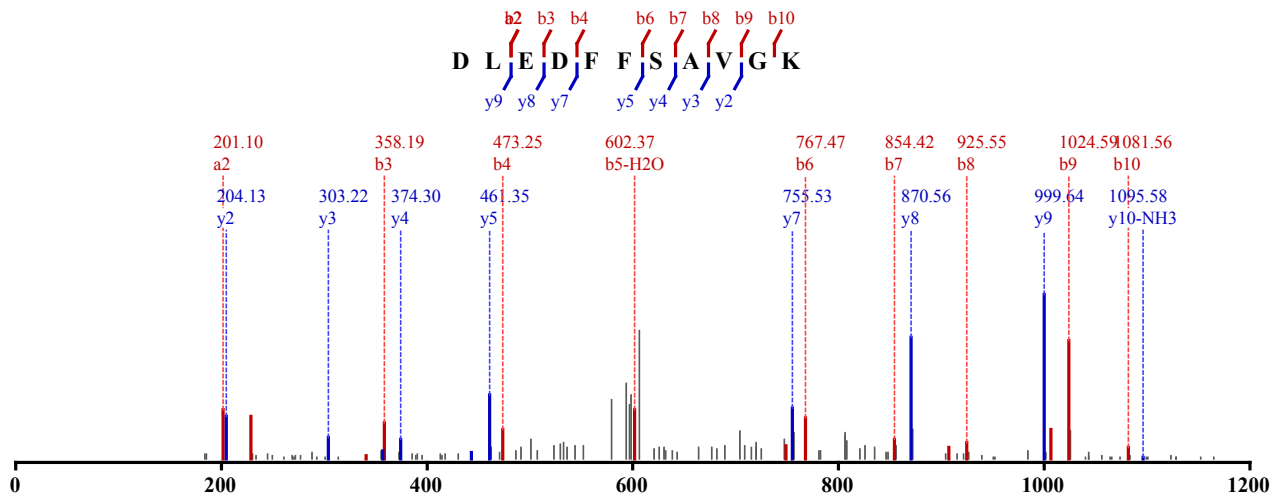

Not Modified

Identified in MSS484 with qvalue 0.00  
 Charge: 2, Exp. m/z: 614.297, Calc. m/z: 614.297  
 Data File: HeLa\_Try\_pH2\_HCD\_1, Scans: 49517 - 49517

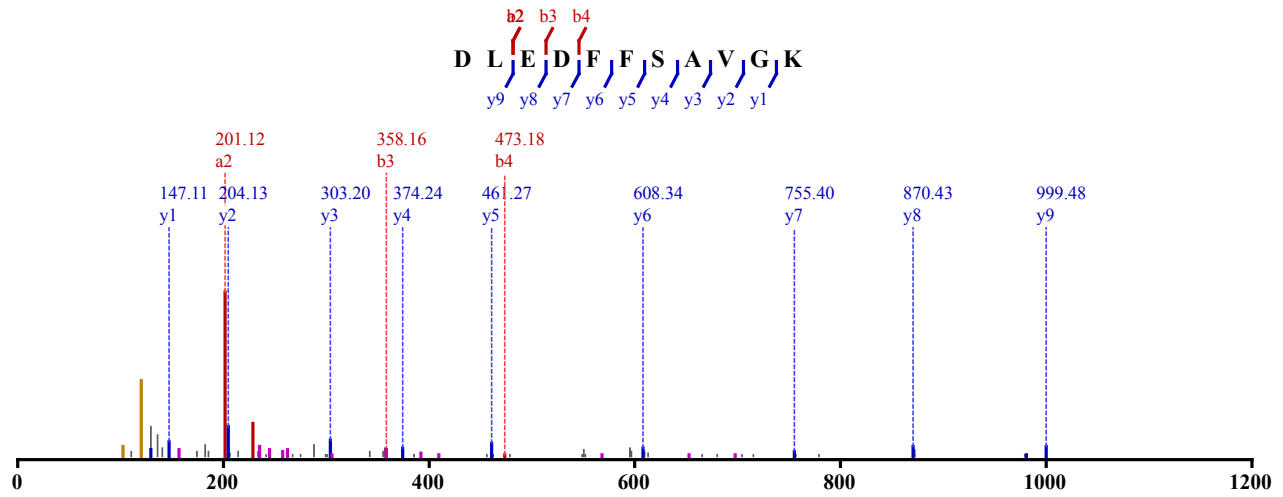

Not Modified  
 Identified in MSS484 with qvalue 0.00  
 Charge: 2, Exp. m/z: 614.296, Calc. m/z: 614.297  
 Data File: HeLa\_Try\_pH2\_HCD\_2, Scans: 48944 - 48944

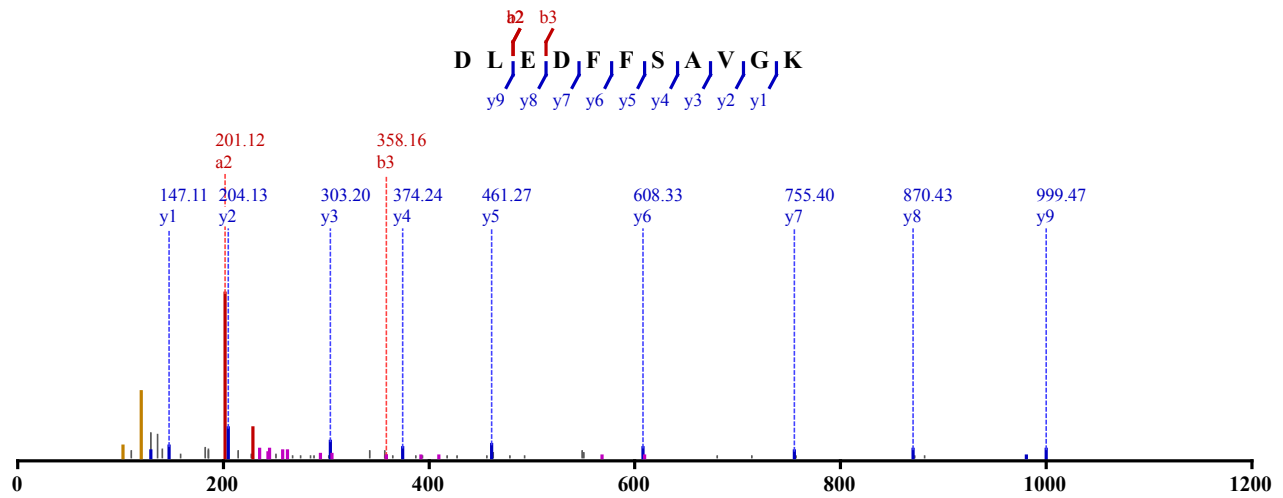

Not Modified  
 Identified in MSS484 with qvalue 0.00  
 Charge: 2, Exp. m/z: 614.299, Calc. m/z: 614.297  
 Data File: HeLa\_Try\_pH2\_HCD\_3, Scans: 46435 - 46435

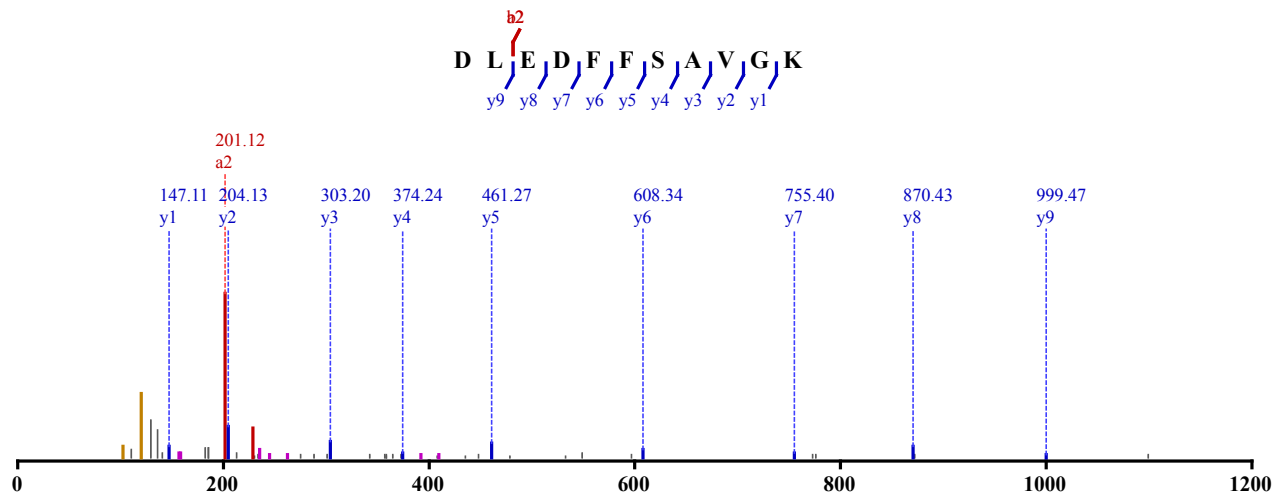

Not Modified  
 Identified in MSS488 with qvalue 0.00  
 Charge: 2, Exp. m/z: 614.300, Calc. m/z: 614.297  
 Data File: HeLa\_chy-try\_pH2\_CID\_3xload, Scans: 42803 - 42803

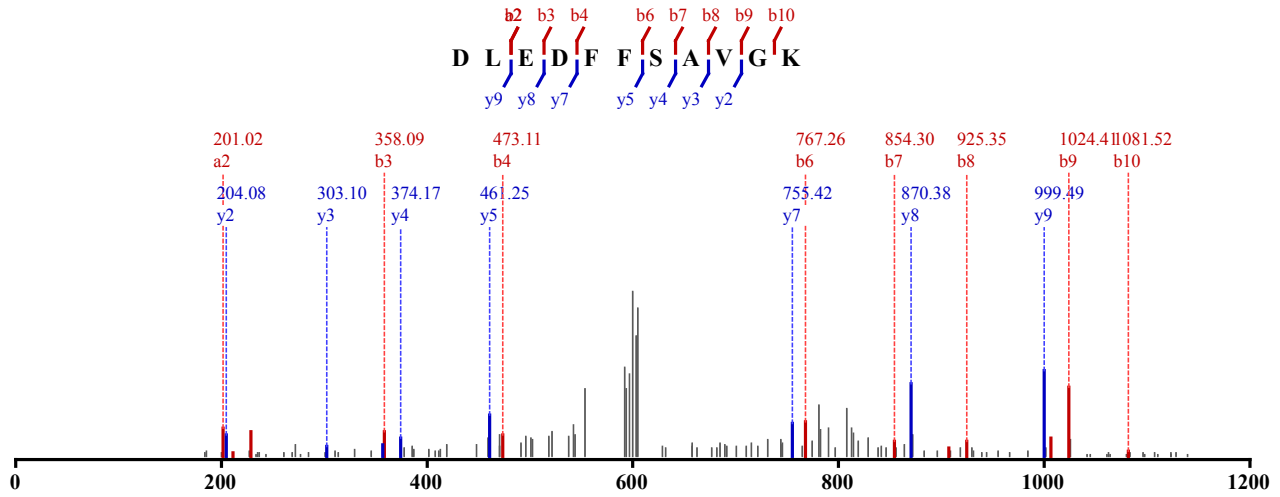

Not Modified  
 Identified in MSS480 with qvalue 0.00  
 Charge: 4, Exp. m/z: 923.166, Calc. m/z: 923.167  
 Data File: HeLa\_try\_pH3\_CID\_3xload\_3, Scans: 24192 - 24192

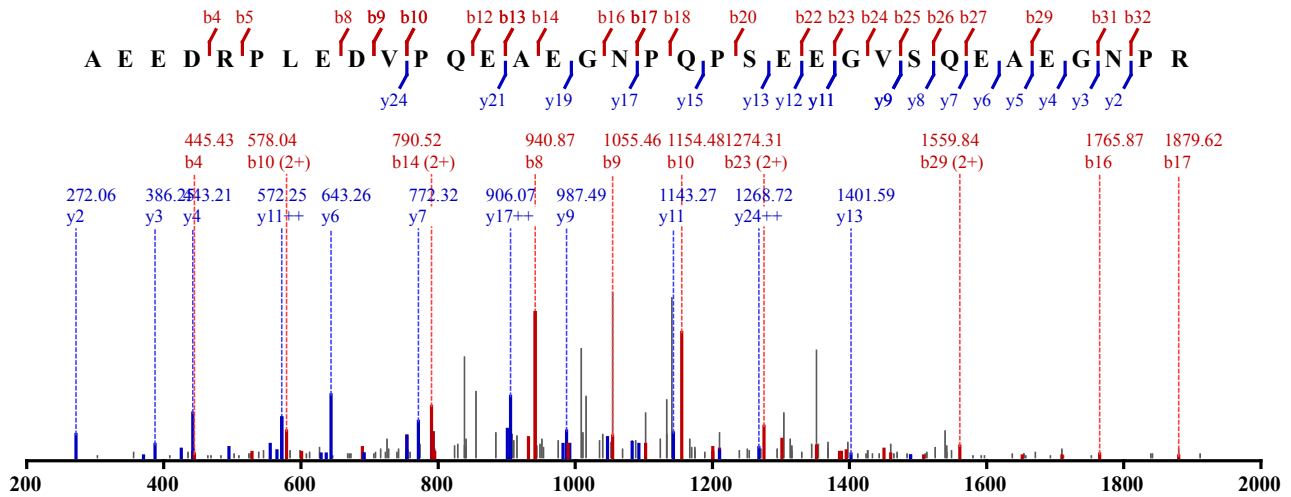

Not Modified  
 Identified in MSS480 with qvalue 0.00  
 Charge: 4, Exp. m/z: 922.916, Calc. m/z: 923.167  
 Data File: HeLa\_try\_pH3\_CID\_3xload, Scans: 21477 - 21477

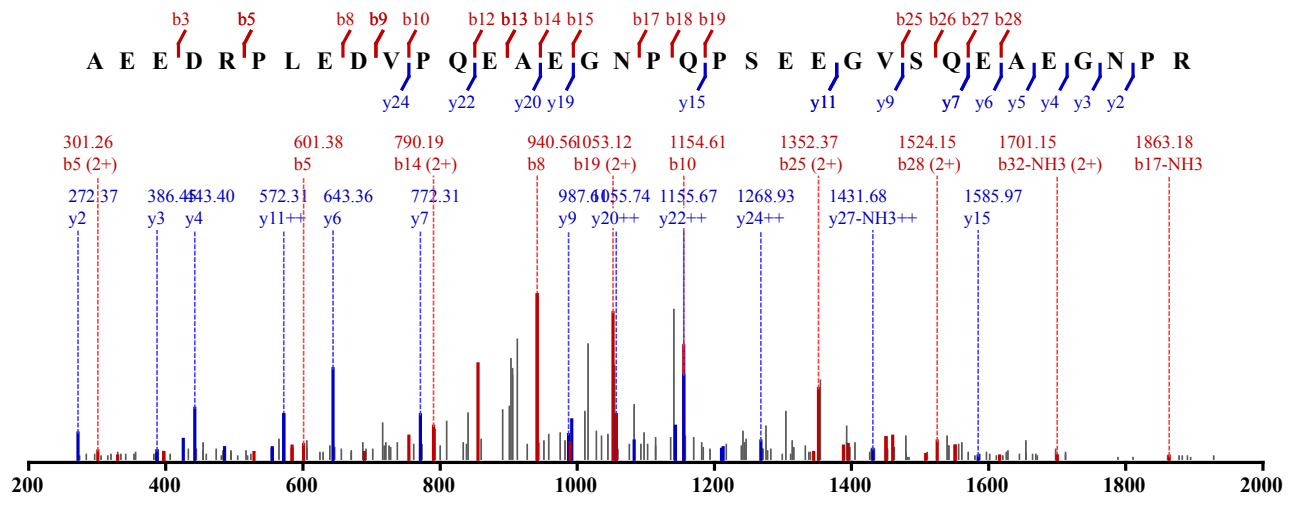

Not Modified  
 Identified in MSS484 with qvalue 0.00  
 Charge: 3, Exp. m/z: 1230.560, Calc. m/z: 1230.554  
 Data File: HeLa\_Try\_pH3\_HCD\_1, Scans: 31853 - 31853

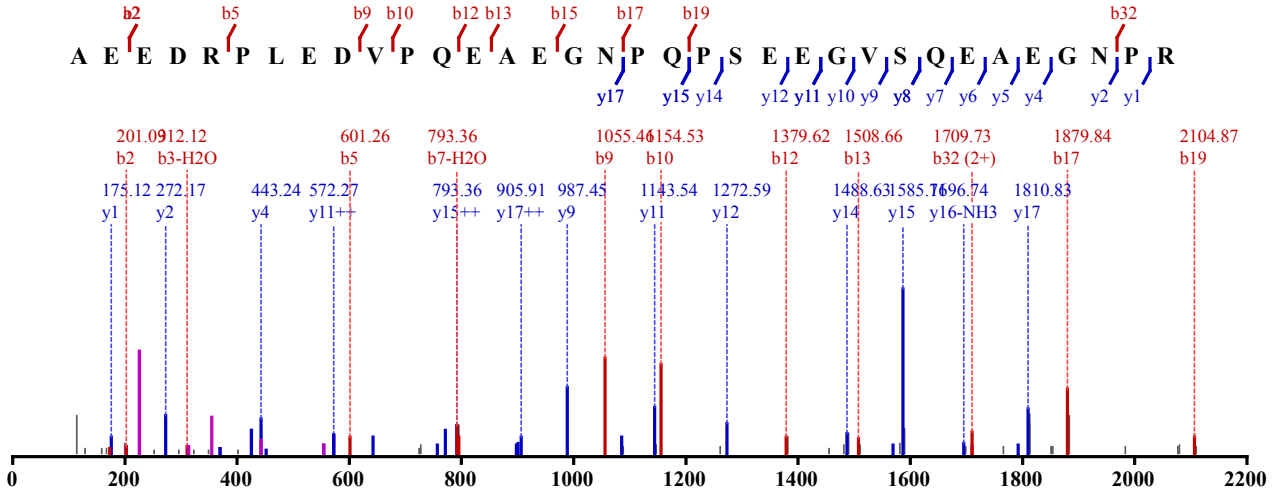

Not Modified  
 Identified in MSS484 with qvalue 0.00  
 Charge: 4, Exp. m/z: 923.166, Calc. m/z: 923.167  
 Data File: HeLa\_Try\_pH3\_HCD\_2, Scans: 32055 - 32055

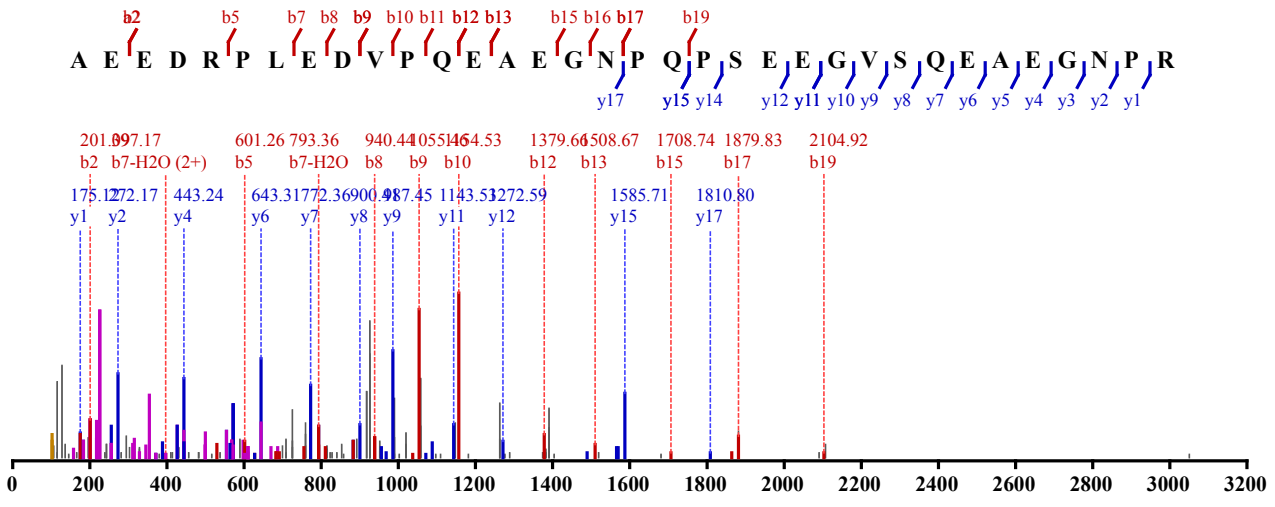

Not Modified  
 Identified in MSS488 with qvalue 0.00  
 Charge: 4, Exp. m/z: 923.166, Calc. m/z: 923.167

Data File: HeLa\_chy-try\_pH2\_CID\_3xload\_2, Scans: 19033 - 19033

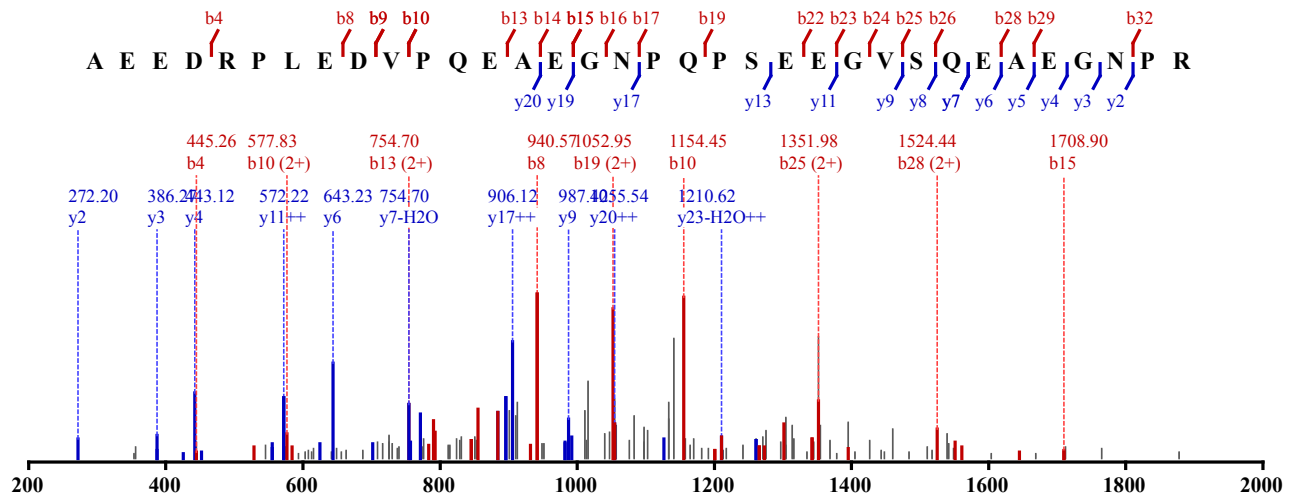

Not Modified

Identified in MSS488 with qvalue 0.00

Charge: 4, Exp. m/z: 923.417, Calc. m/z: 923.167

Data File: HeLa\_chy-try\_pH2\_CID\_3xload\_3, Scans: 20445 - 20445

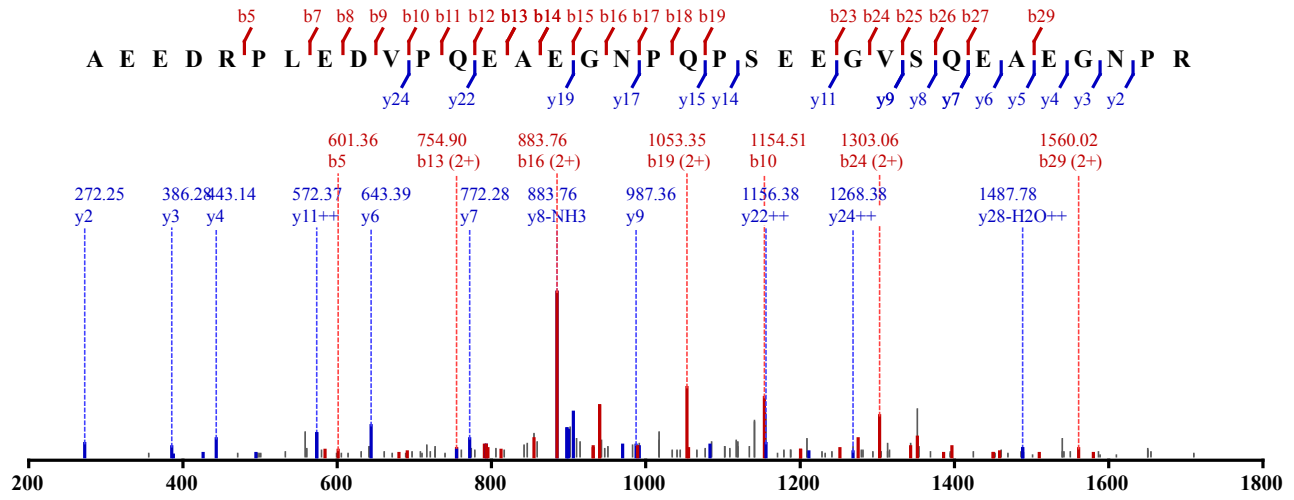

Not Modified

Identified in MSS485 with qvalue 0.00

Charge: 2, Exp. m/z: 564.338, Calc. m/z: 564.337

Data File: HeLa\_LysC\_pH11\_HCD\_3, Scans: 42214 - 42214

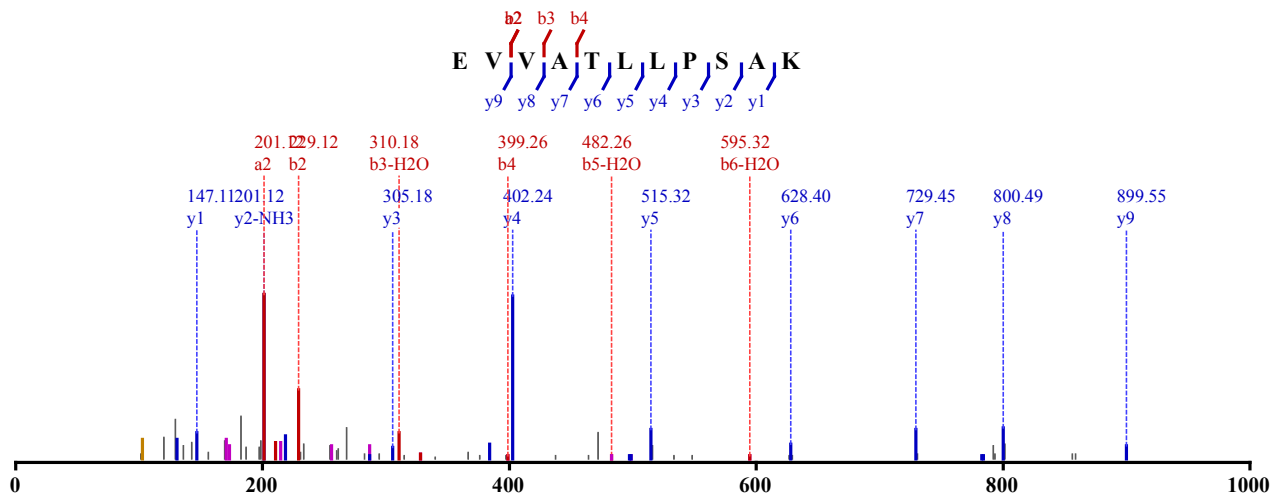

Not Modified

Identified in MSS485 with qvalue 0.00  
 Charge: 2, Exp. m/z: 564.337, Calc. m/z: 564.337  
 Data File: HeLa\_LysC\_pH11\_HCD\_2, Scans: 43304 - 43304

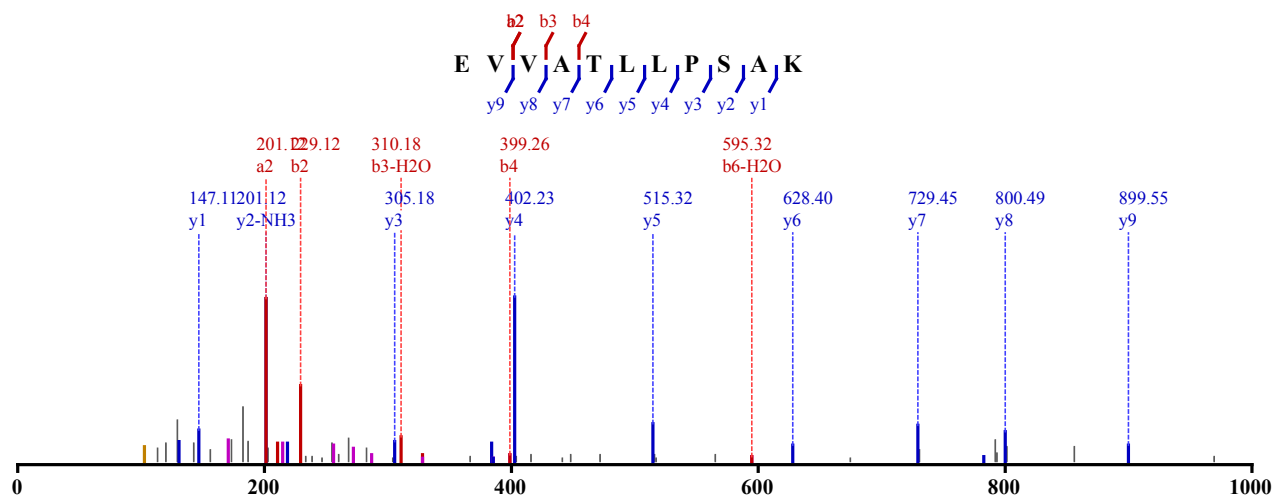

Not Modified  
 Identified in MSS486 with qvalue 0.00  
 Charge: 5, Exp. m/z: 421.632, Calc. m/z: 421.229  
 Data File: HeLa\_GluC\_80pcACN\_HCD\_3, Scans: 19910 - 19910

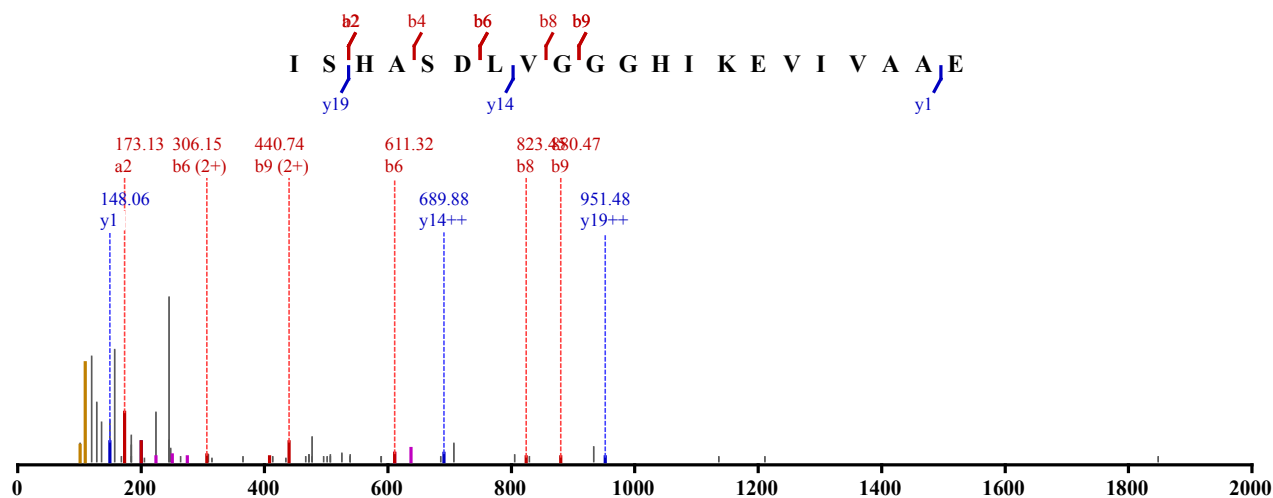

Not Modified  
 Identified in MSS485 with qvalue 0.00  
 Charge: 3, Exp. m/z: 679.347, Calc. m/z: 679.347  
 Data File: HeLa\_LysC\_pH2\_HCD\_2, Scans: 46923 - 46923

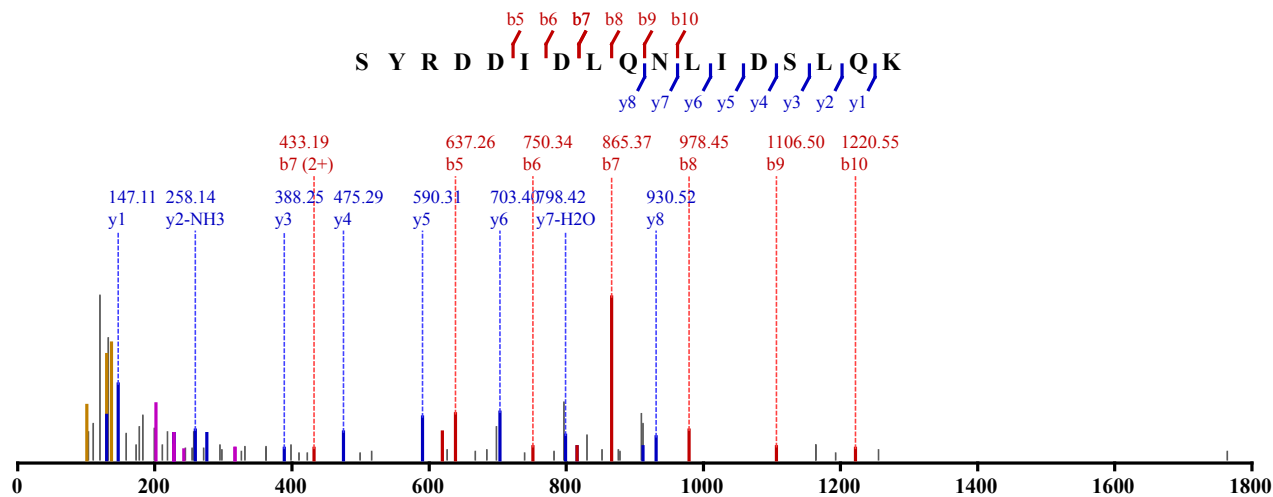

Not Modified  
 Identified in MSS485 with qvalue 0.00  
 Charge: 3, Exp. m/z: 679.350, Calc. m/z: 679.347  
 Data File: HeLa\_LysC\_pH2\_HCD\_3, Scans: 47870 - 47870

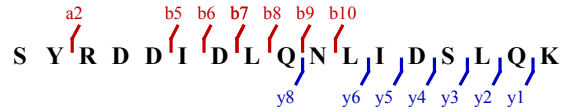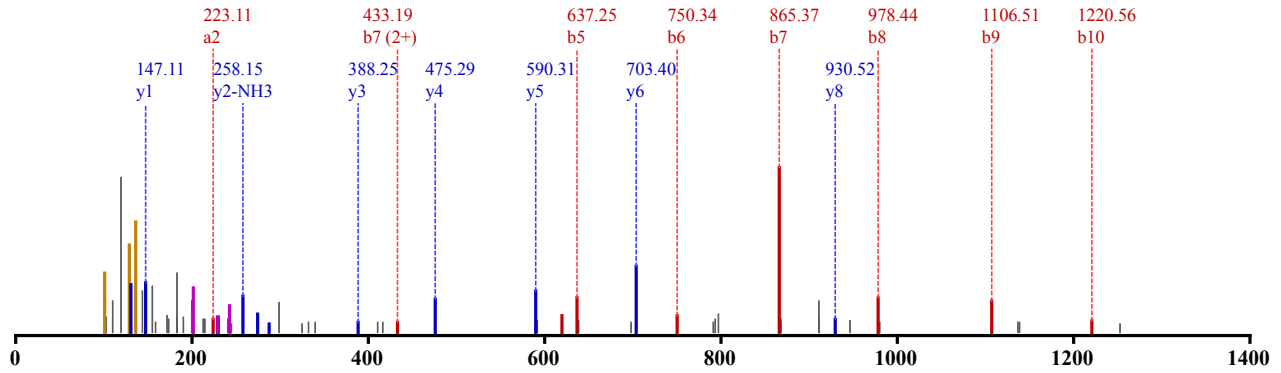

Not Modified  
 Identified in MSS128 with qvalue 0.00  
 Charge: 2, Exp. m/z: 559.759, Calc. m/z: 559.757  
 Data File: HeLa\_AspN\_HCD\_2, Scans: 7996 - 7996

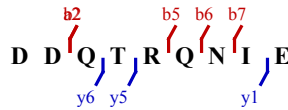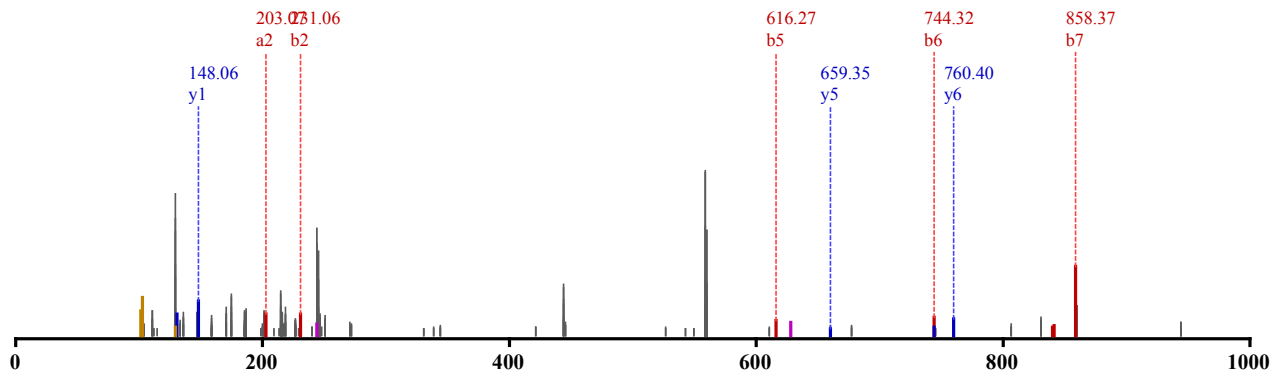

Not Modified  
 Identified in MSS479 with qvalue 0.00  
 Charge: 2, Exp. m/z: 559.758, Calc. m/z: 559.757  
 Data File: HeLa\_AspN\_pH11\_HCD\_1, Scans: 9718 - 9718

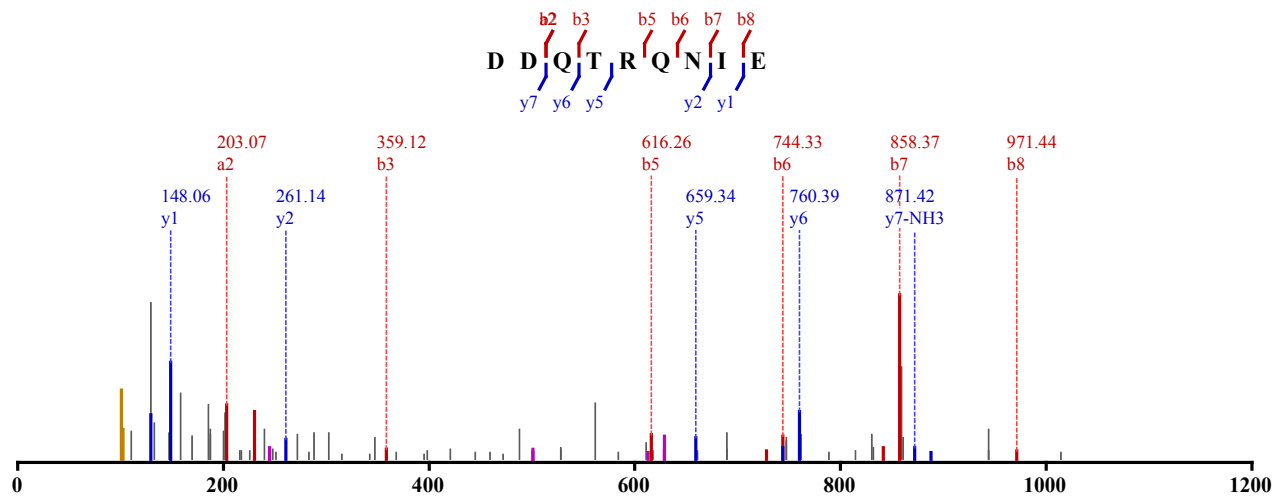

Not Modified  
 Identified in MSS483 with qvalue 0.01  
 Charge: 2, Exp. m/z: 559.757, Calc. m/z: 559.757  
 Data File: HeLa\_AspN\_pH11\_CID\_3xload\_2, Scans: 7397 - 7397

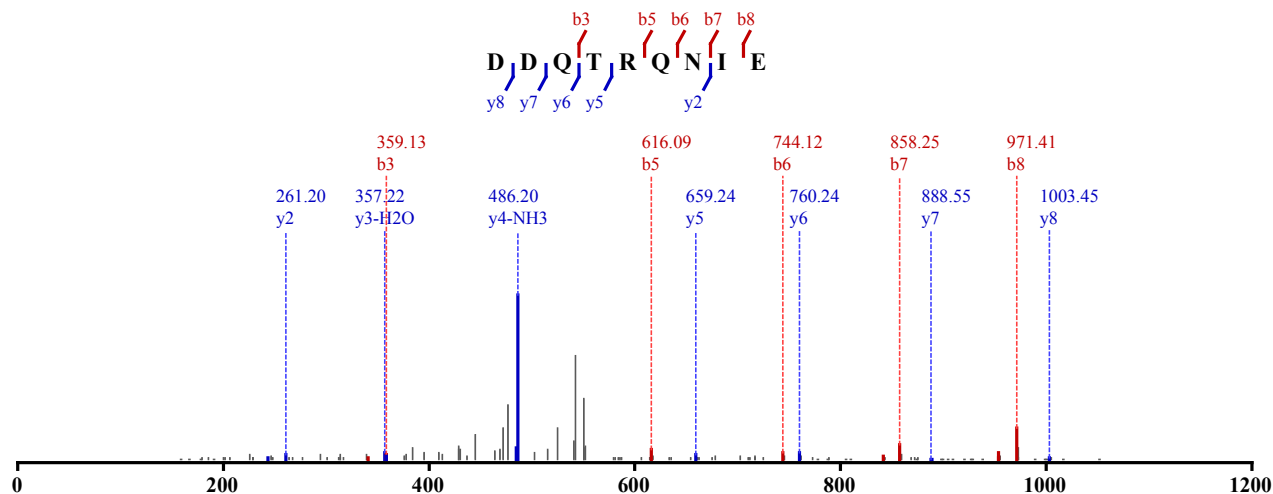

1 x Oxidation (M)  
 Identified in MSS480 with qvalue 0.00  
 Charge: 3, Exp. m/z: 869.062, Calc. m/z: 869.061  
 Data File: HeLa\_try\_pH3\_CID\_3xload, Scans: 16570 - 16570

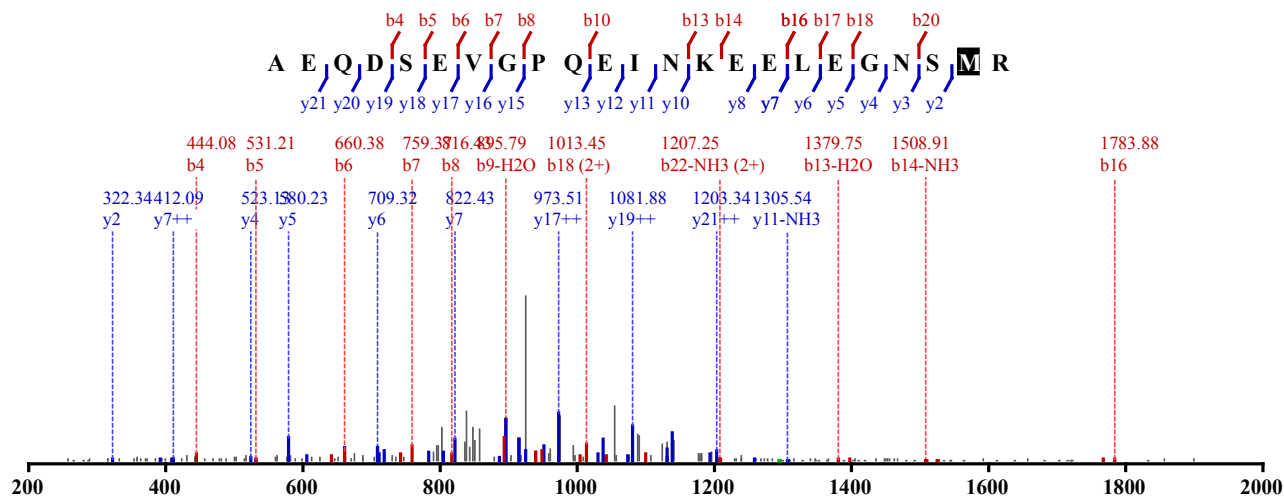

Not Modified  
 Identified in MSS481 with qvalue 0.00  
 Charge: 2, Exp. m/z: 884.980, Calc. m/z: 884.477



Data File: HeLa\_LysC\_pH8\_CID\_3load\_3, Scans: 41918 - 41918

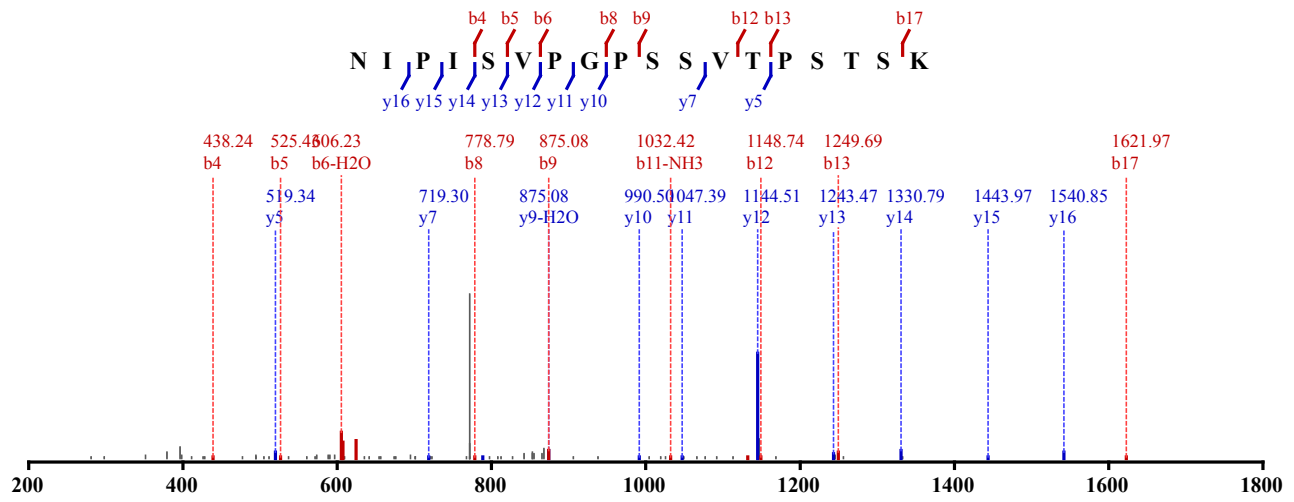

1 x Oxidation (M)

Identified in MSS484 with qvalue 0.00

Charge: 3, Exp. m/z: 648.654, Calc. m/z: 648.654

Data File: HeLa\_Try\_pH11\_HCD\_2, Scans: 26029 - 26029

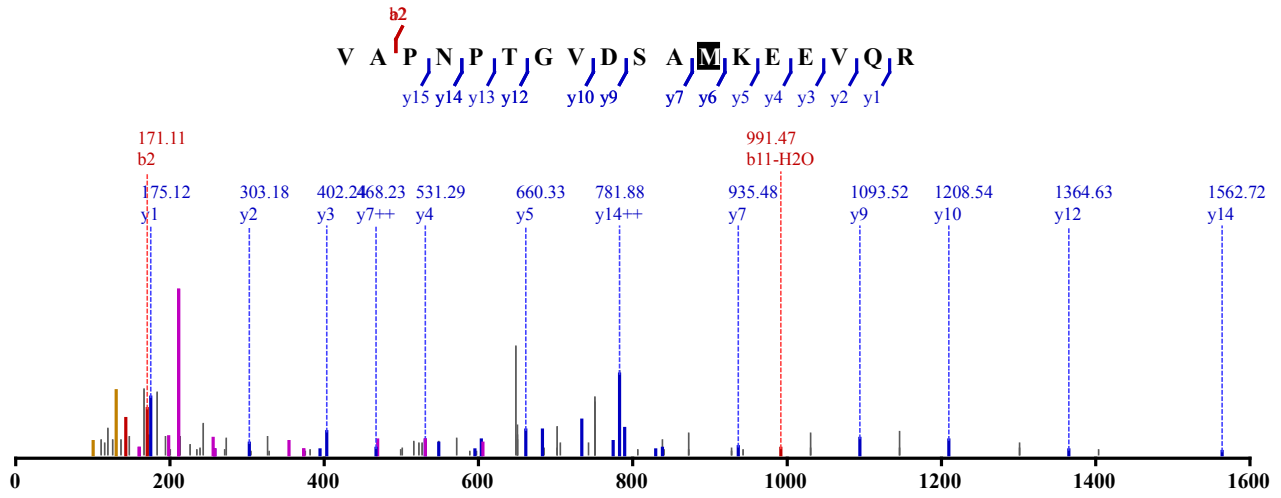

1 x Oxidation (M)

Identified in MSS484 with qvalue 0.00

Charge: 3, Exp. m/z: 648.654, Calc. m/z: 648.654

Data File: HeLa\_Try\_pH11\_HCD\_3, Scans: 23560 - 23560

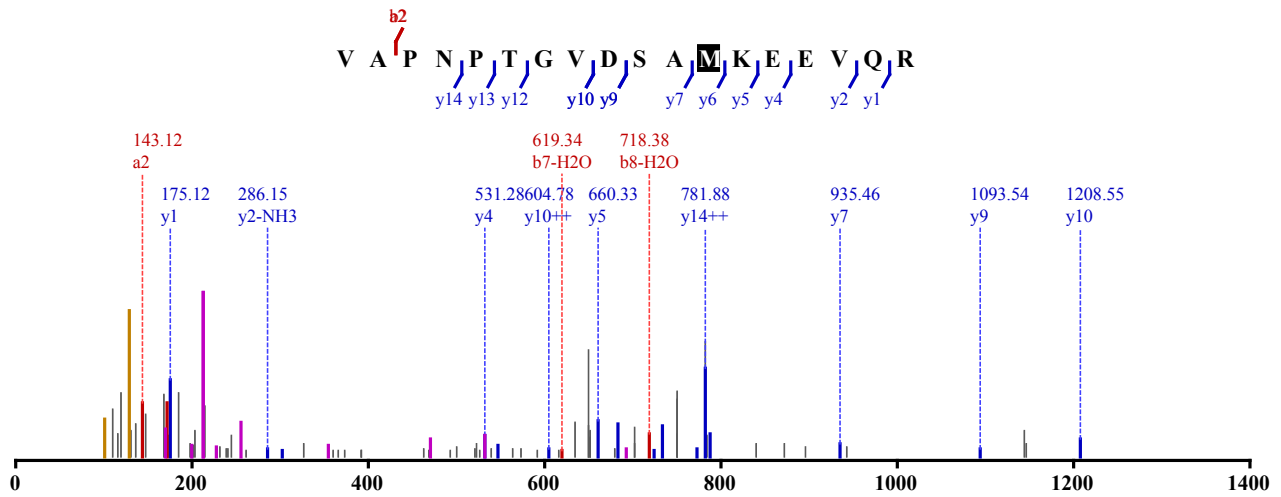

Not Modified

Identified in MSS483 with qvalue 0.00  
 Charge: 2, Exp. m/z: 738.385, Calc. m/z: 738.387  
 Data File: HeLa\_AspN\_pH2\_CID\_3xload\_2, Scans: 39173 - 39173

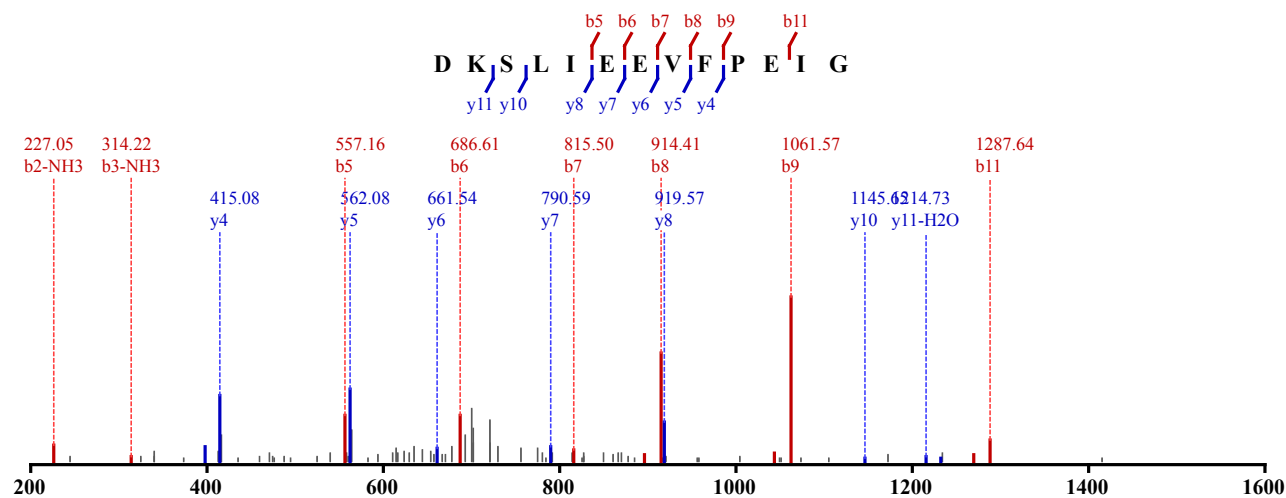

Not Modified  
 Identified in MSS483 with qvalue 0.00  
 Charge: 2, Exp. m/z: 738.386, Calc. m/z: 738.387  
 Data File: HeLa\_AspN\_pH2\_CID\_3xload\_2, Scans: 39242 - 39242

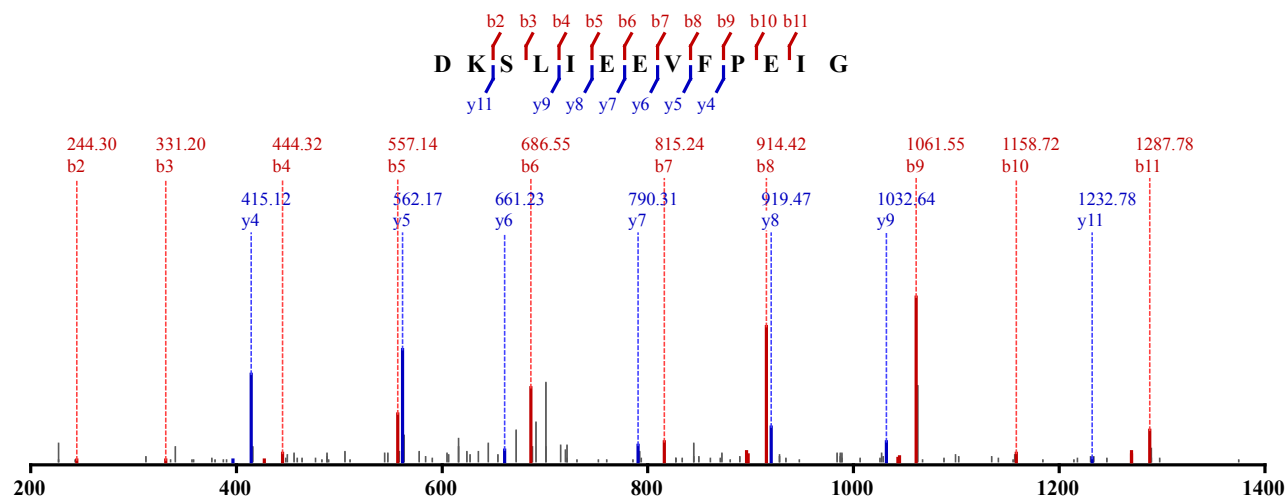

Not Modified  
 Identified in MSS483 with qvalue 0.00  
 Charge: 2, Exp. m/z: 738.385, Calc. m/z: 738.387  
 Data File: HeLa\_AspN\_pH2\_CID\_3xload, Scans: 39304 - 39304

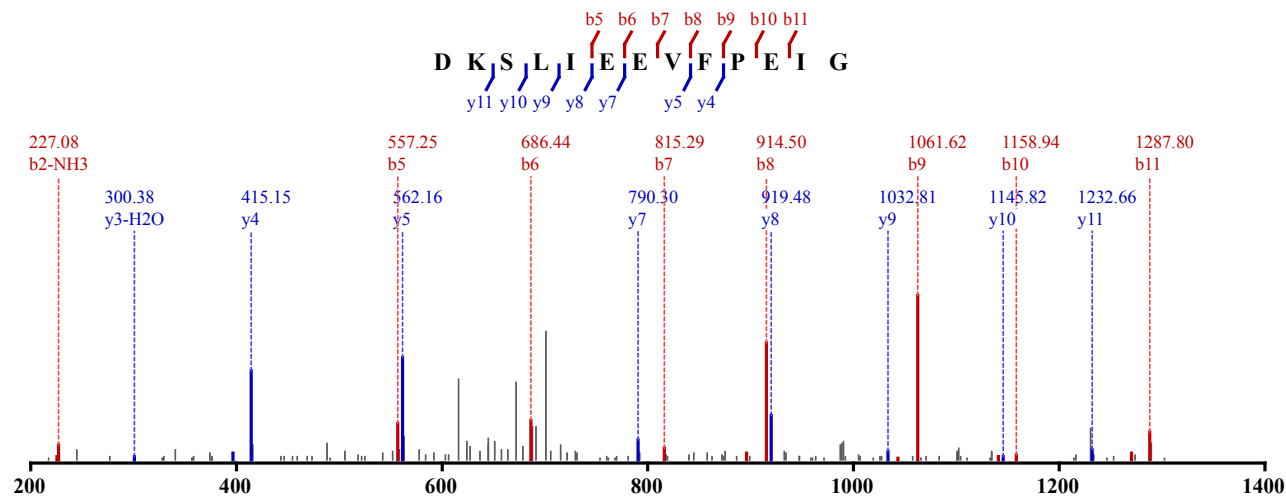

Not Modified

Identified in MSS483 with qvalue 0.00

Charge: 2, Exp. m/z: 738.385, Calc. m/z: 738.387

Data File: HeLa\_AspN\_pH2\_CID\_3xload, Scans: 39373 - 39373

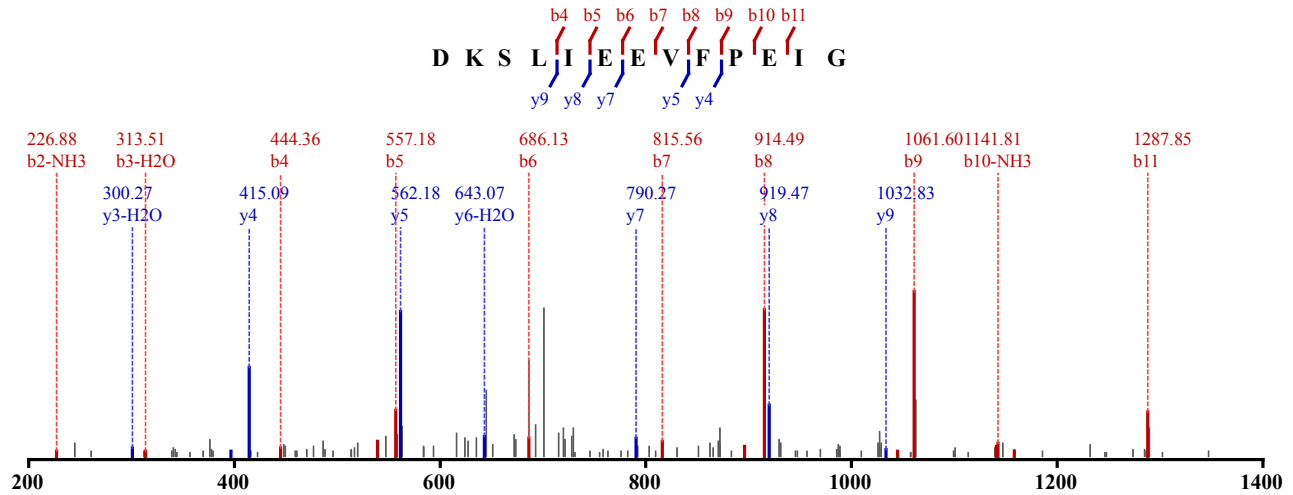

Not Modified

Identified in MSS483 with qvalue 0.00

Charge: 2, Exp. m/z: 738.886, Calc. m/z: 738.387

Data File: HeLa\_AspN\_pH2\_CID\_3xload, Scans: 39420 - 39420

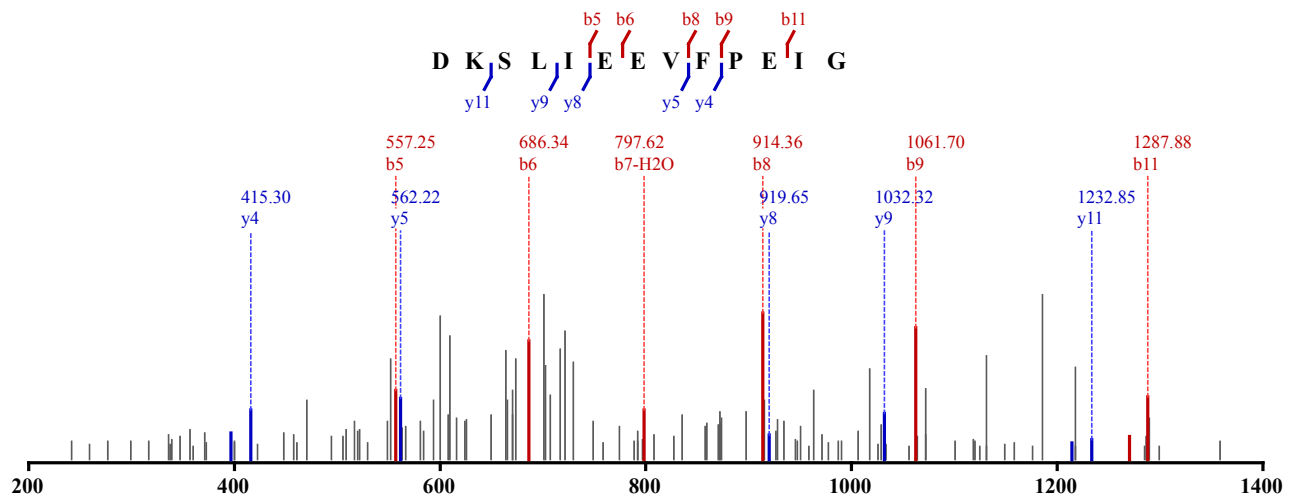

Not Modified

Identified in MSS483 with qvalue 0.00

Charge: 2, Exp. m/z: 737.863, Calc. m/z: 738.357

Data File: HeLa\_AspN\_80pcACN\_CID\_3xload, Scans: 32339 - 32339

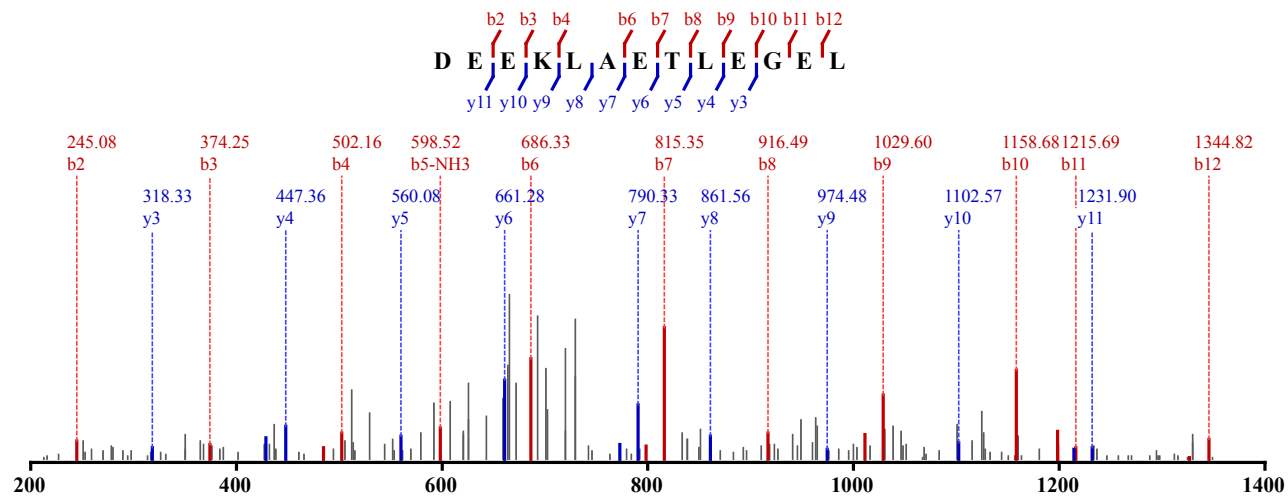

Not Modified  
 Identified in MSS483 with qvalue 0.00  
 Charge: 2, Exp. m/z: 738.359, Calc. m/z: 738.357  
 Data File: HeLa\_AspN\_pH2\_CID\_3xload\_2, Scans: 26338 - 26338

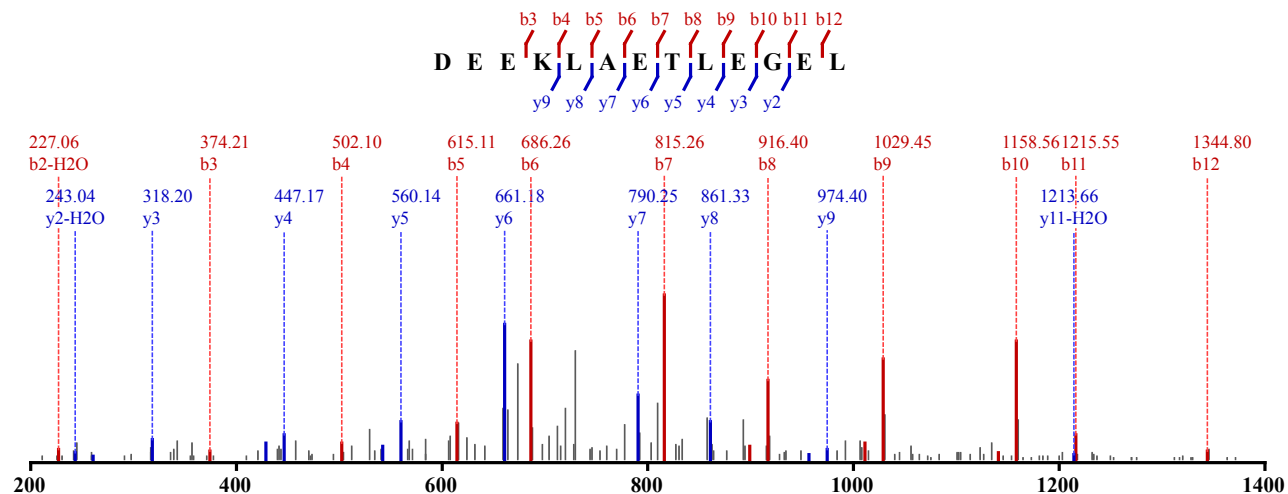

Not Modified  
 Identified in MSS479 with qvalue 0.01  
 Charge: 3, Exp. m/z: 793.004, Calc. m/z: 793.007  
 Data File: HeLa\_AspN\_pH2\_HCD\_1, Scans: 17136 - 17136

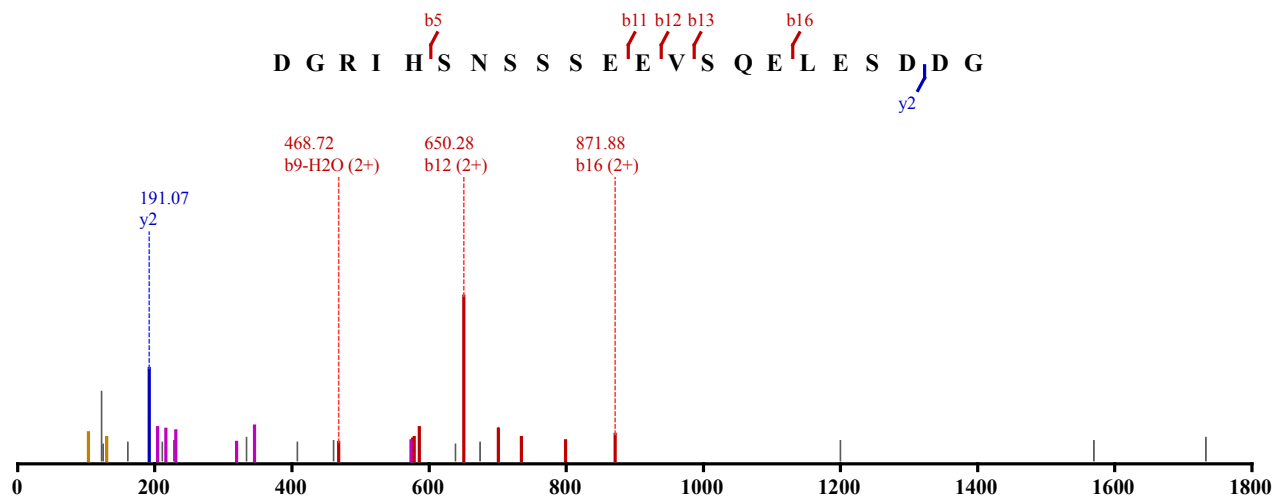

Not Modified  
 Identified in MSS479 with qvalue 0.00  
 Charge: 3, Exp. m/z: 793.007, Calc. m/z: 793.007

Data File: HeLa\_AspN\_pH2\_HCD\_2, Scans: 16428 - 16428

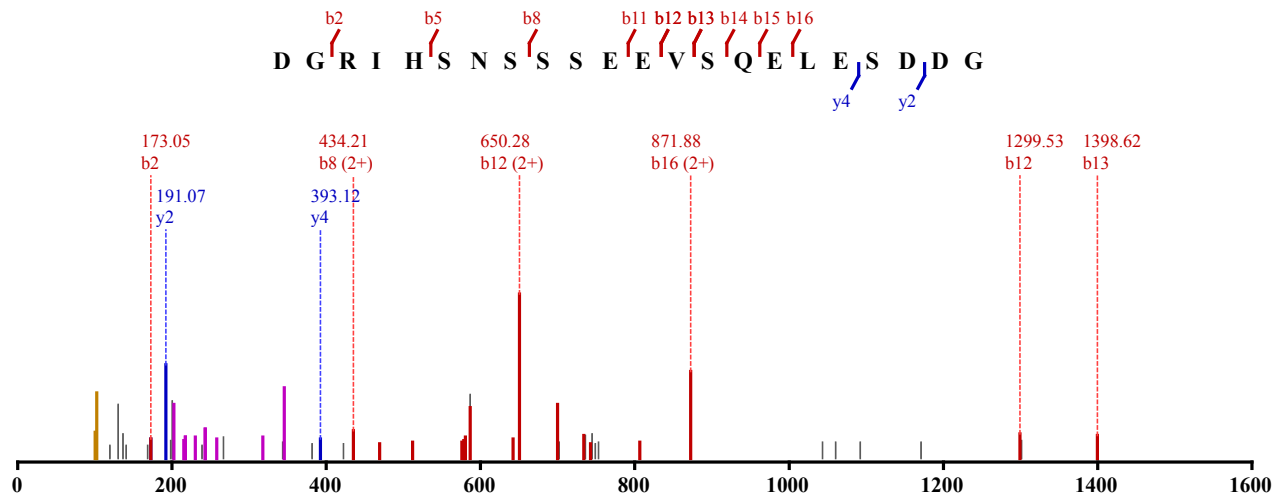

Not Modified

Identified in MSS479 with qvalue 0.00

Charge: 3, Exp. m/z: 793.006, Calc. m/z: 793.007

Data File: HeLa\_AspN\_pH3\_HCD\_1, Scans: 17967 - 17967

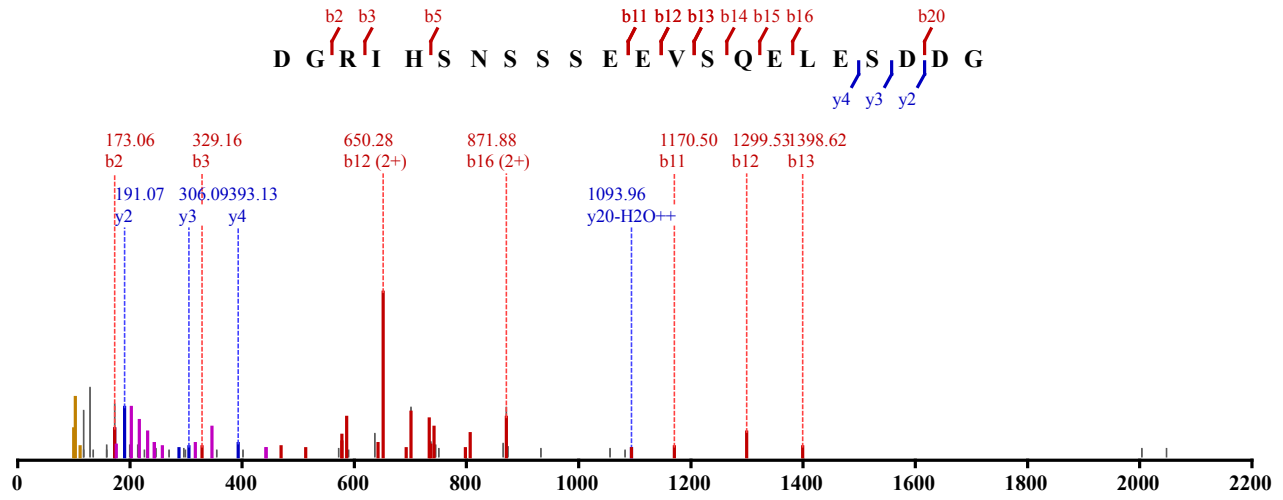

Not Modified

Identified in MSS479 with qvalue 0.00

Charge: 3, Exp. m/z: 793.004, Calc. m/z: 793.007

Data File: HeLa\_AspN\_pH3\_HCD\_2, Scans: 17364 - 17364

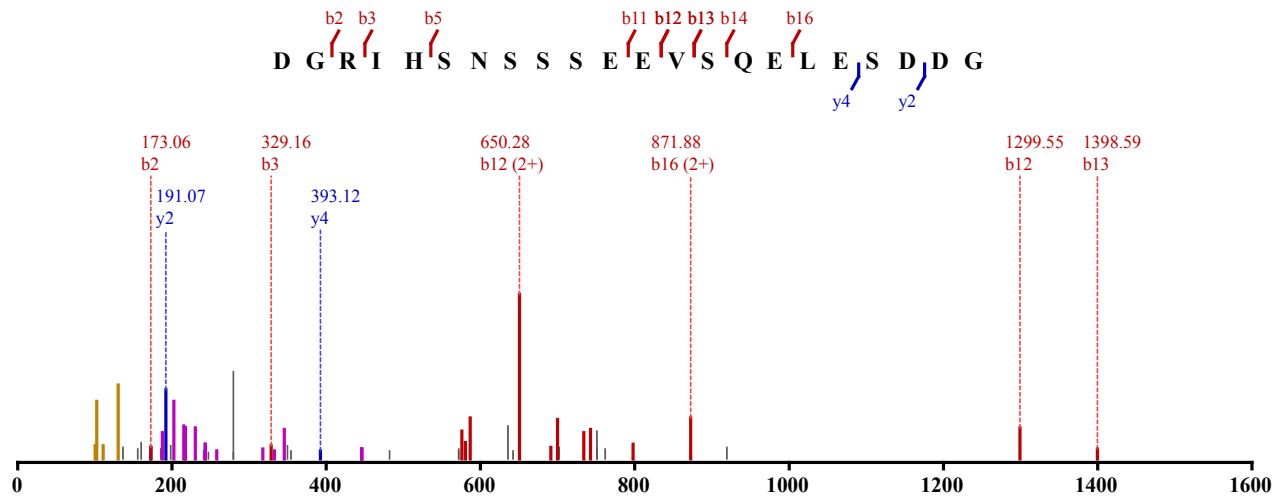

Not Modified

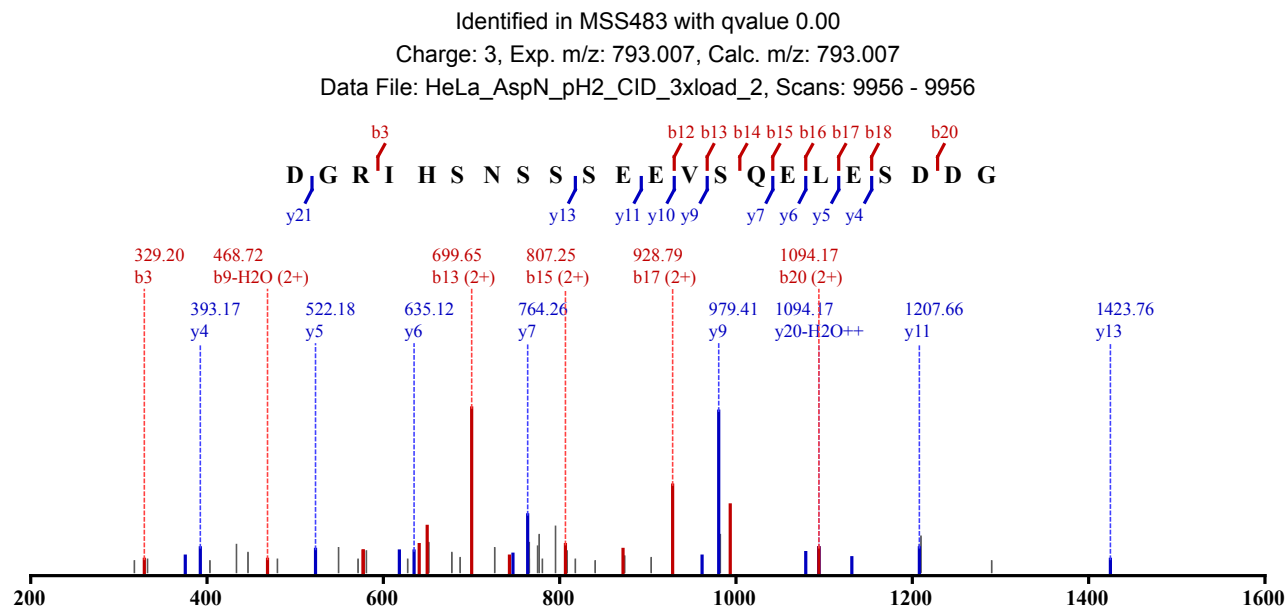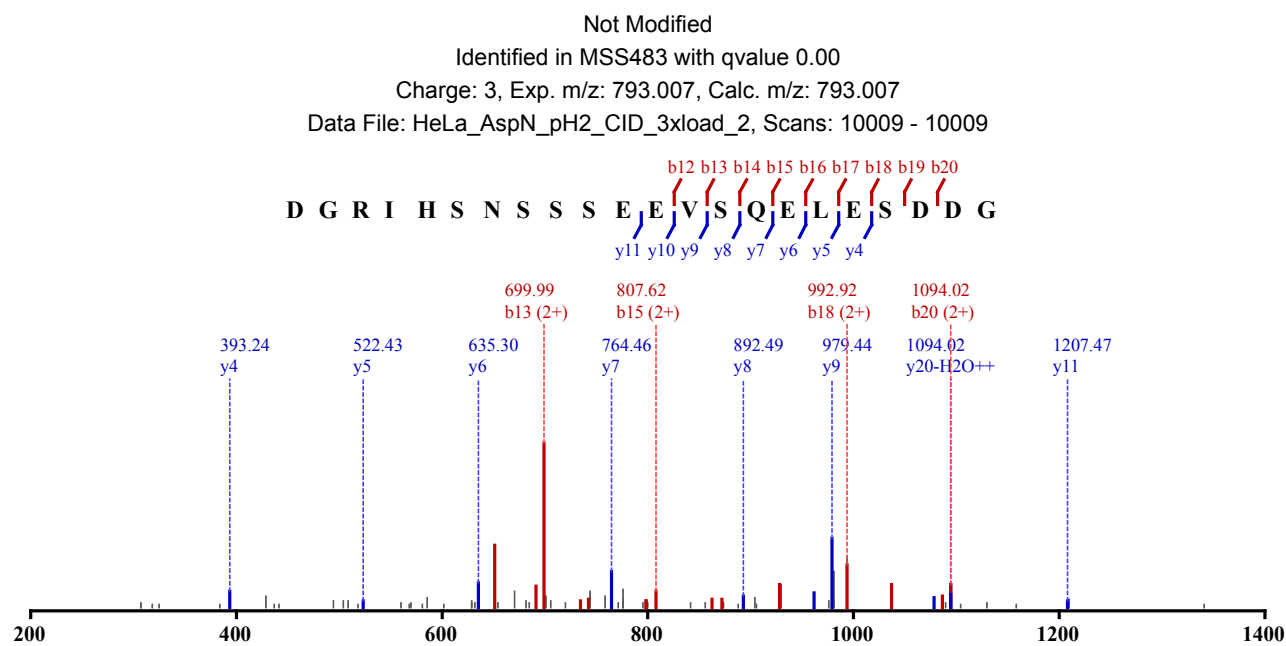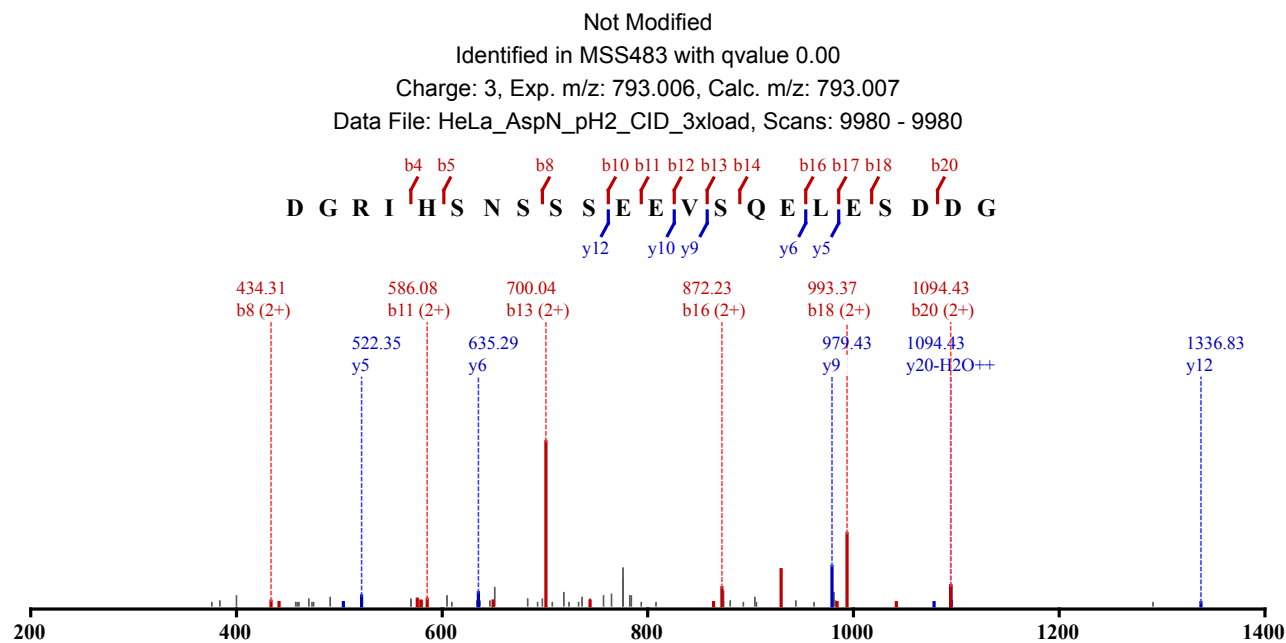

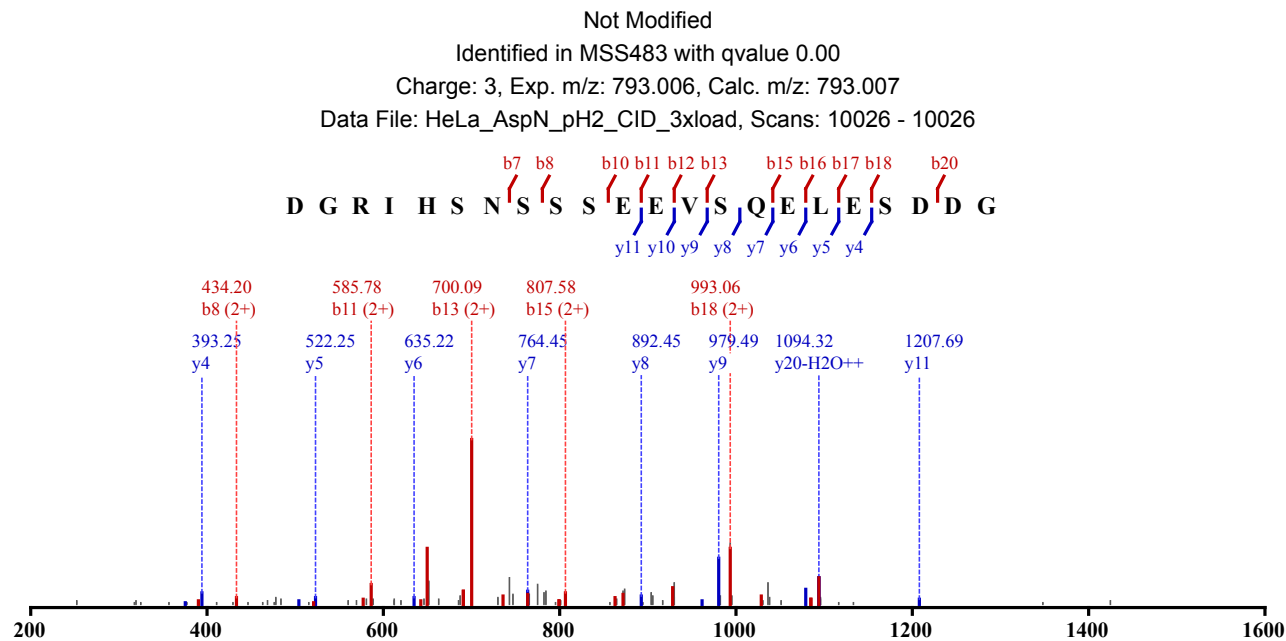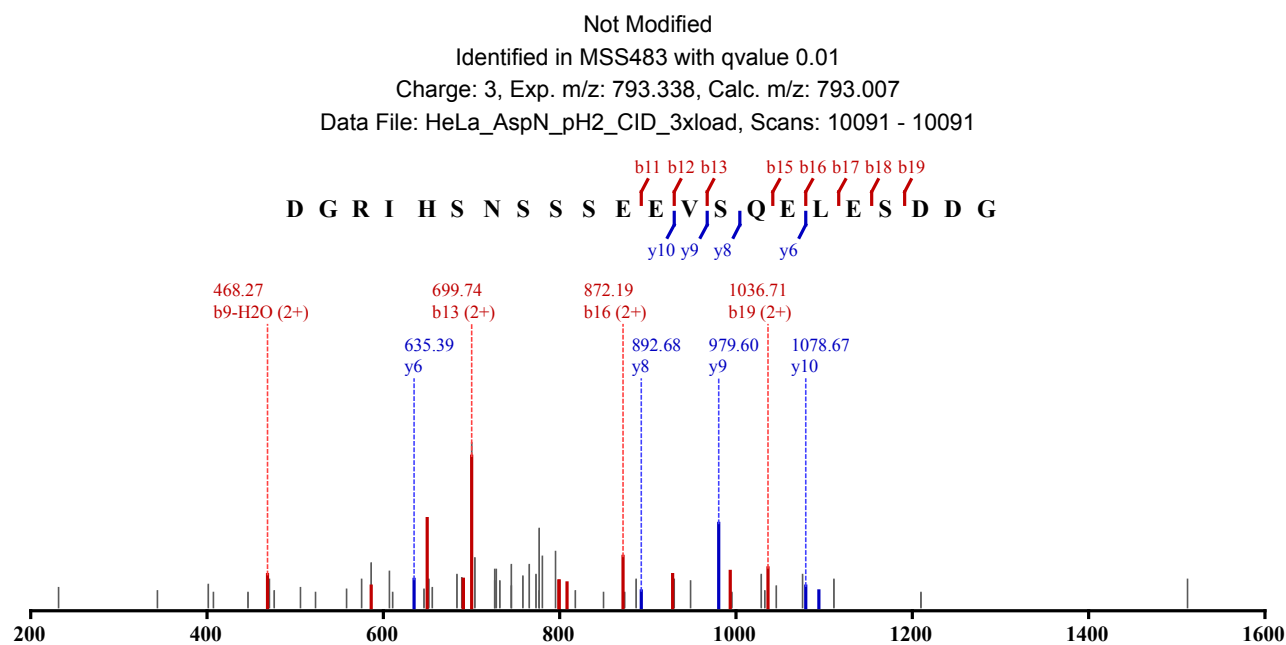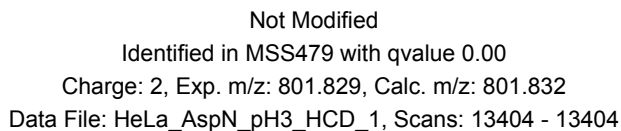

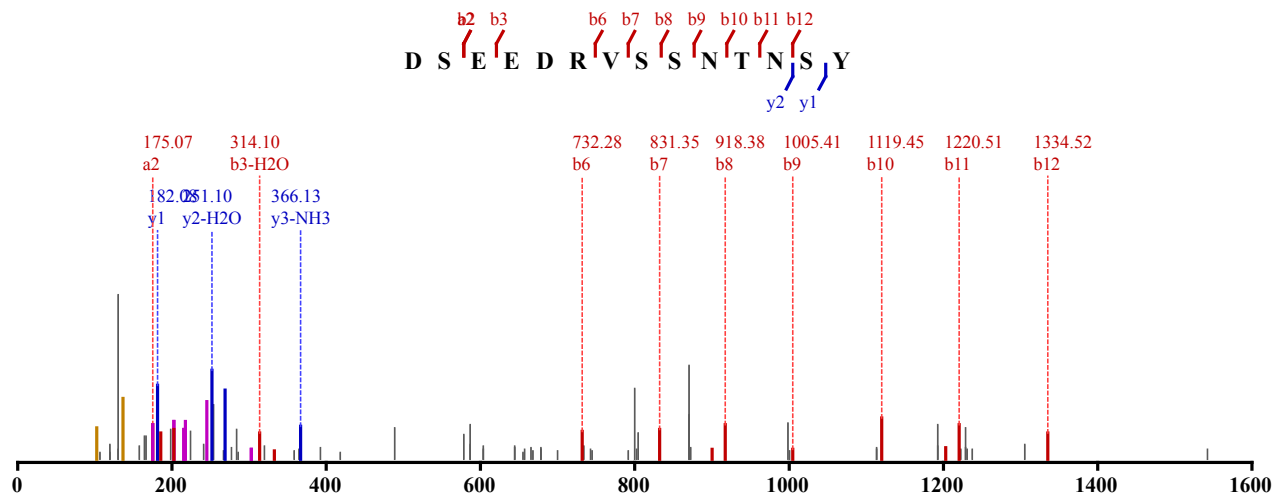

Not Modified  
 Identified in MSS479 with qvalue 0.00  
 Charge: 2, Exp. m/z: 801.829, Calc. m/z: 801.832  
 Data File: HeLa\_AspN\_pH3\_HCD\_2, Scans: 12600 - 12600

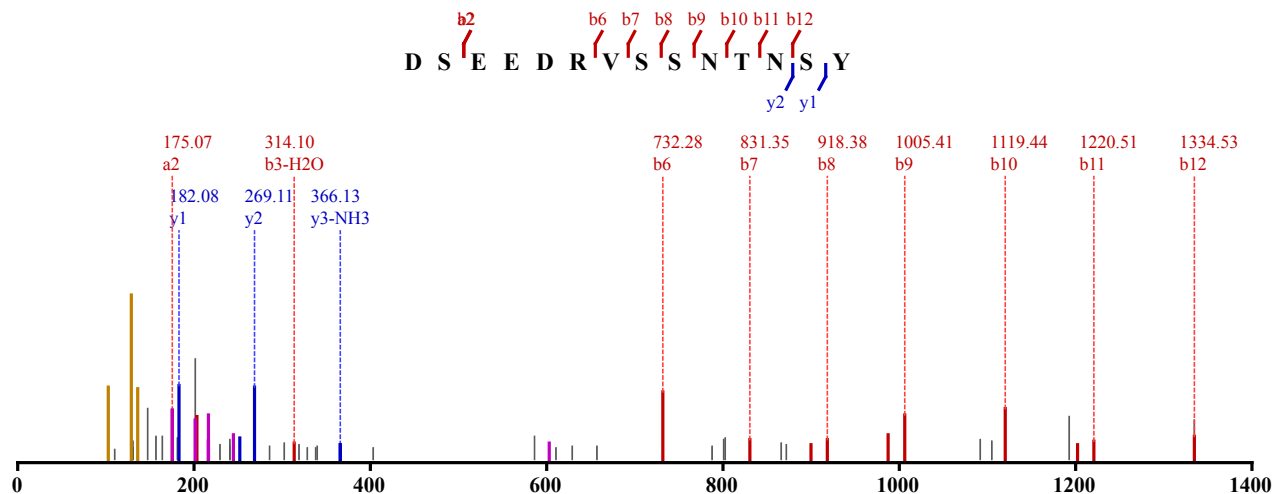

Not Modified  
 Identified in MSS479 with qvalue 0.00  
 Charge: 2, Exp. m/z: 801.829, Calc. m/z: 801.832  
 Data File: HeLa\_AspN\_pH3\_HCD\_3, Scans: 12656 - 12656

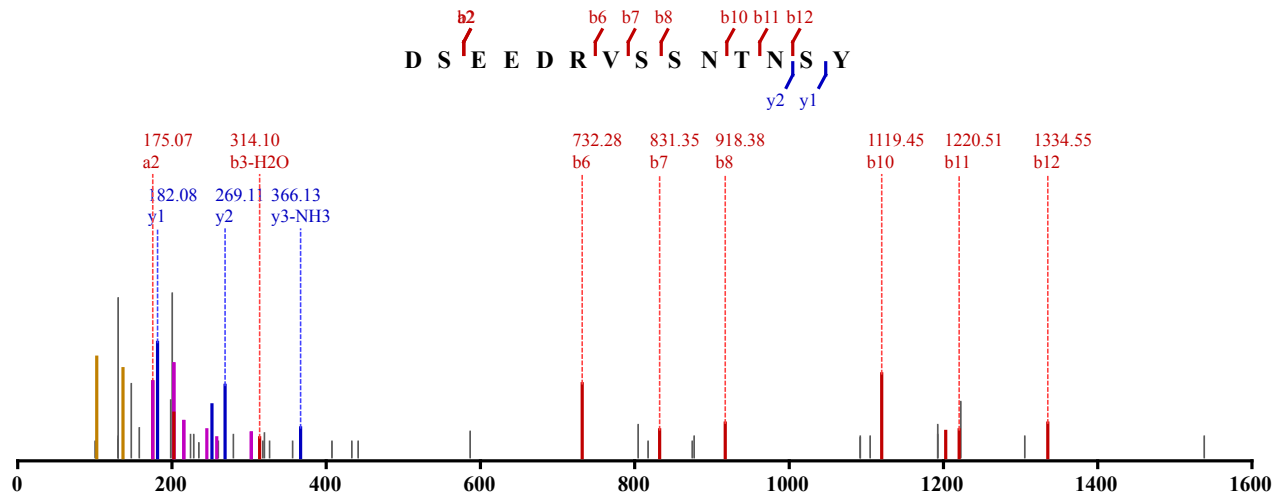

Not Modified  
 Identified in MSS483 with qvalue 0.00  
 Charge: 2, Exp. m/z: 801.829, Calc. m/z: 801.827



Data File: HeLa\_AspN\_pH4\_CID\_3xload, Scans: 7711 - 7711

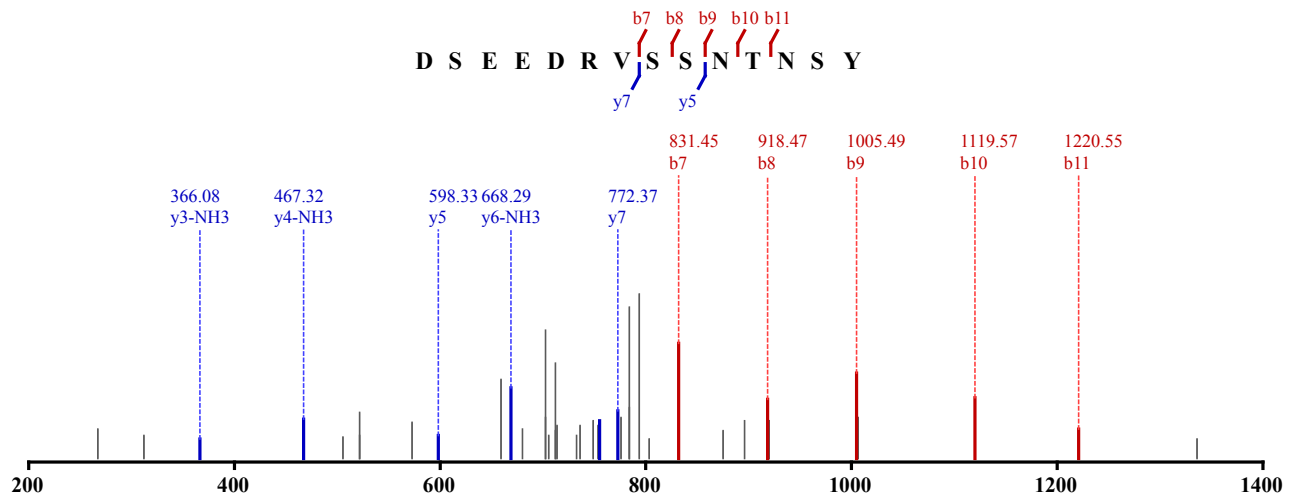

Not Modified

Identified in MSS483 with qvalue 0.00

Charge: 2, Exp. m/z: 801.829, Calc. m/z: 801.832

Data File: HeLa\_AspN\_pH3\_CID\_3xload\_2, Scans: 8389 - 8389

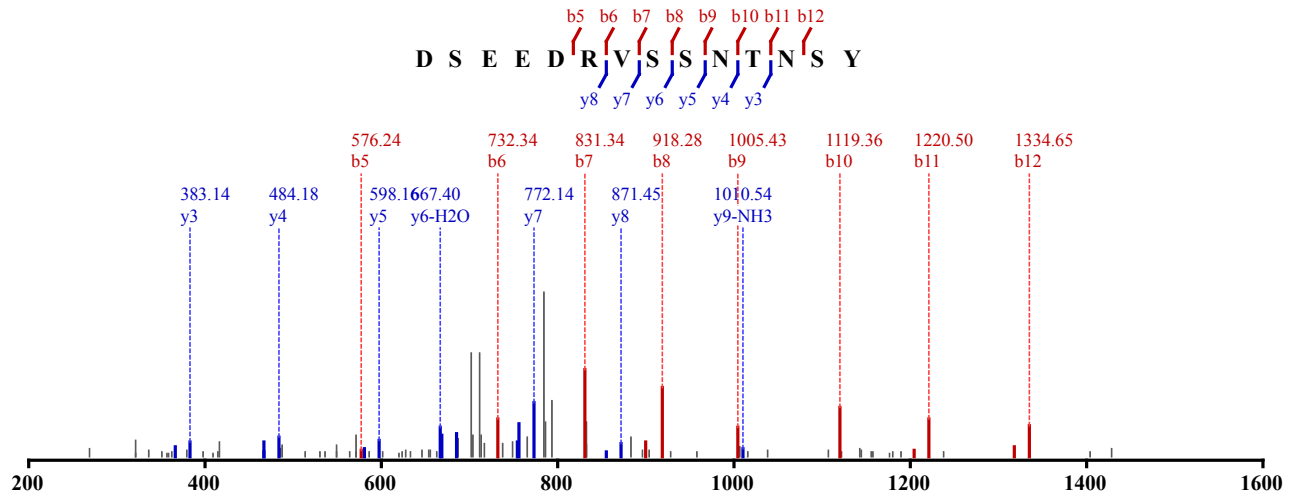

Not Modified

Identified in MSS483 with qvalue 0.00

Charge: 2, Exp. m/z: 801.830, Calc. m/z: 801.832

Data File: HeLa\_AspN\_pH3\_CID\_3xload, Scans: 8512 - 8512

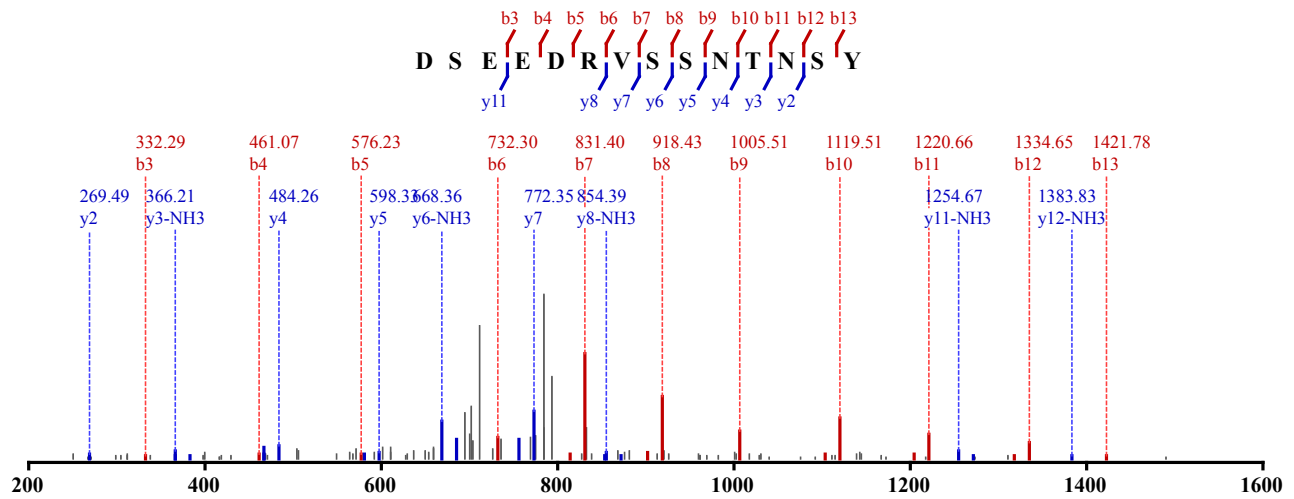

Not Modified

Identified in MSS483 with qvalue 0.00  
 Charge: 2, Exp. m/z: 802.332, Calc. m/z: 801.832  
 Data File: HeLa\_AspN\_pH4\_CID\_3xload\_2, Scans: 7502 - 7502

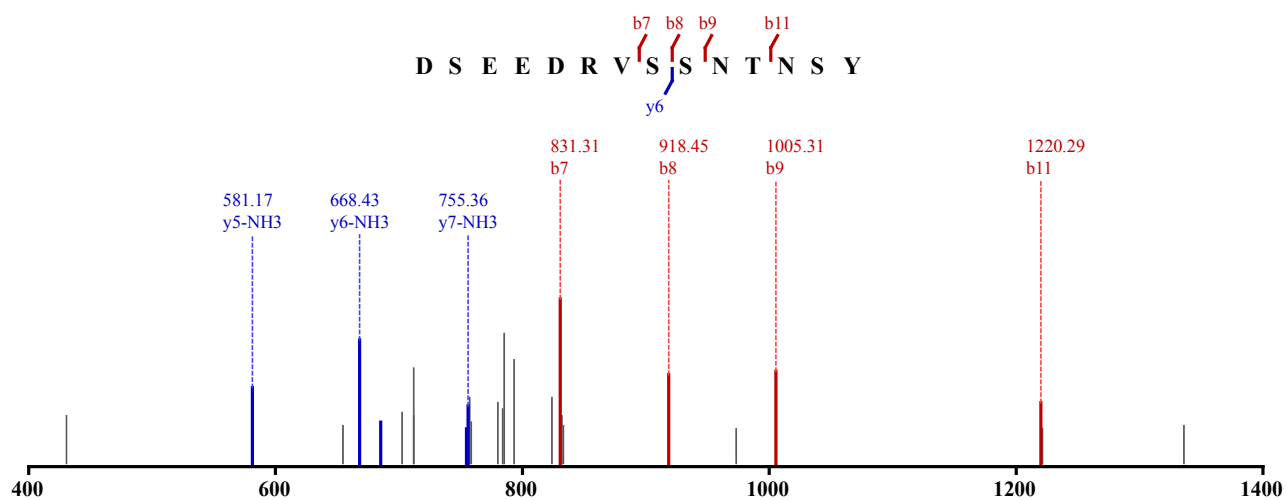

Not Modified  
 Identified in MSS483 with qvalue 0.00  
 Charge: 2, Exp. m/z: 801.831, Calc. m/z: 801.832  
 Data File: HeLa\_AspN\_pH4\_CID\_3xload\_2, Scans: 7517 - 7517

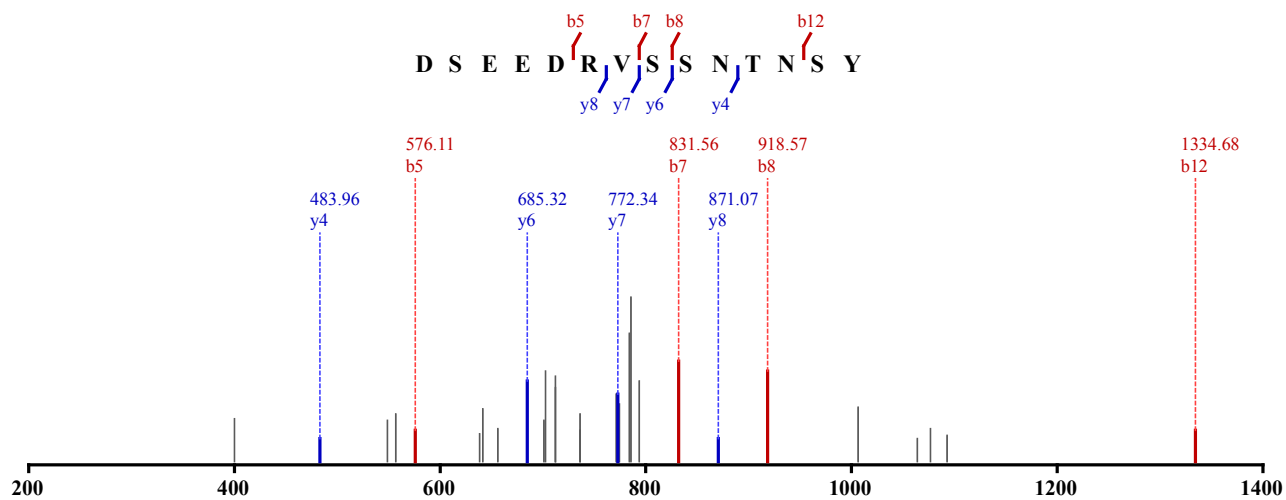

Not Modified  
 Identified in MSS483 with qvalue 0.00  
 Charge: 2, Exp. m/z: 801.829, Calc. m/z: 801.832  
 Data File: HeLa\_AspN\_pH6\_CID\_3xload\_2, Scans: 8800 - 8800

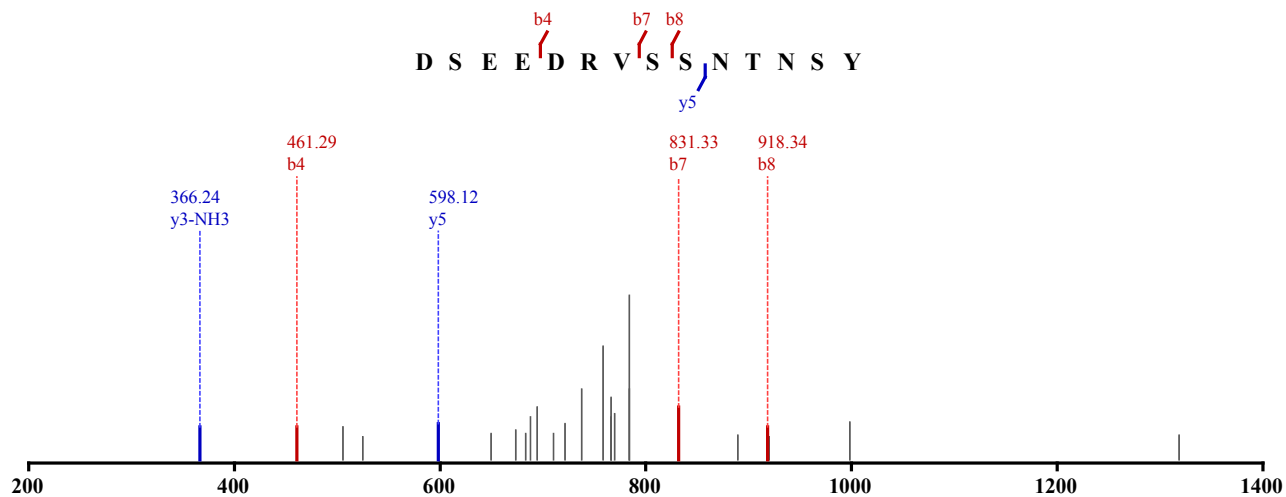

Not Modified

Identified in MSS481 with qvalue 0.00

Charge: 2, Exp. m/z: 700.821, Calc. m/z: 700.822

Data File: HeLa\_LysC\_pH3\_CID\_3xload\_2, Scans: 14002 - 14002

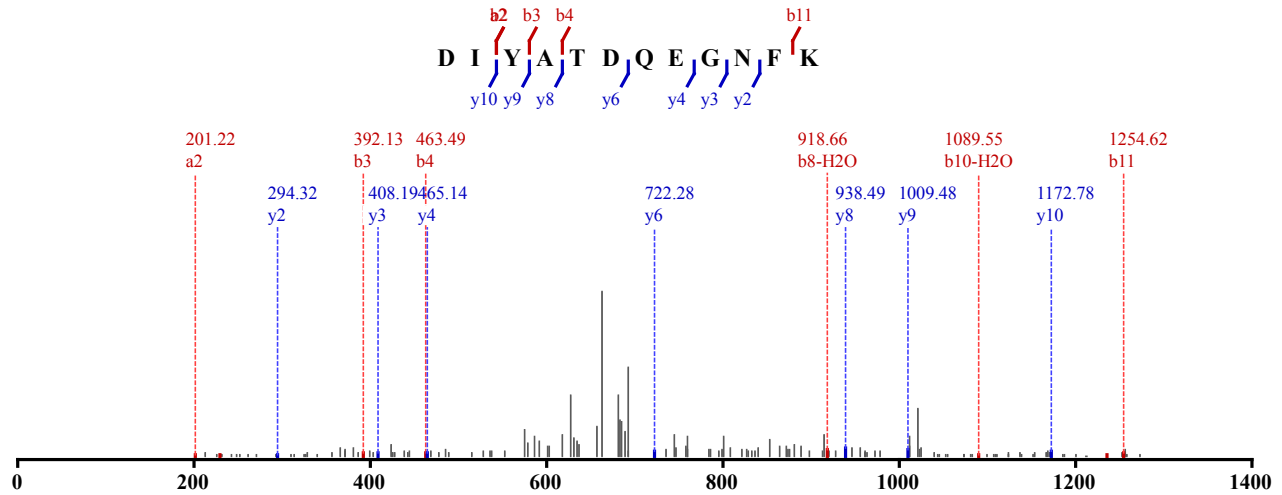

Not Modified

Identified in MSS481 with qvalue 0.00

Charge: 2, Exp. m/z: 700.823, Calc. m/z: 700.822

Data File: HeLa\_LysC\_pH5\_CID\_3xload\_2, Scans: 14284 - 14284

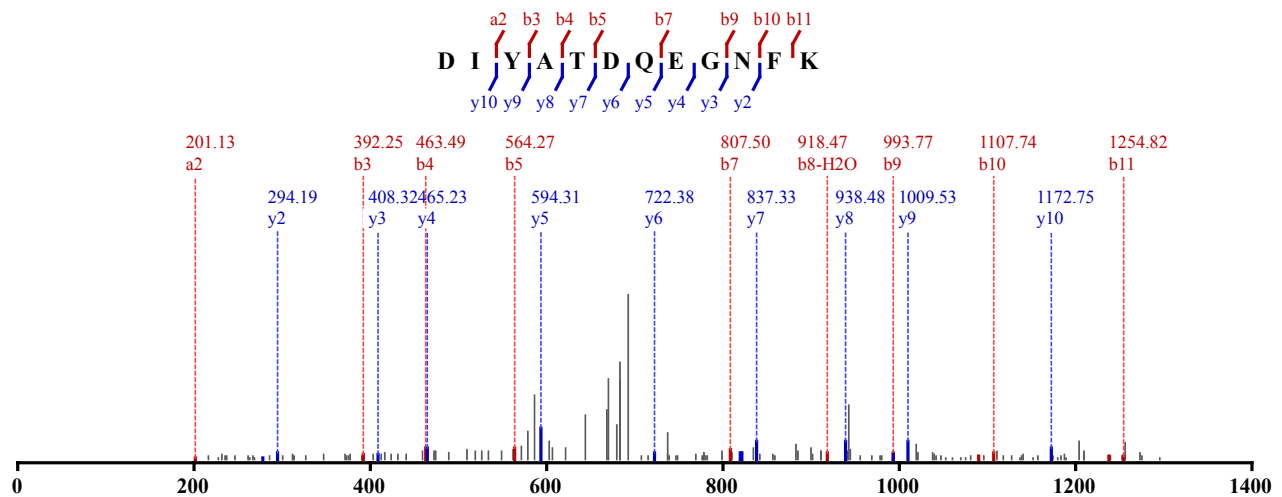

Not Modified

Identified in MSS481 with qvalue 0.00

Charge: 2, Exp. m/z: 700.820, Calc. m/z: 700.822

Data File: HeLa\_LysC\_pH4\_CID\_3xload, Scans: 12788 - 12788

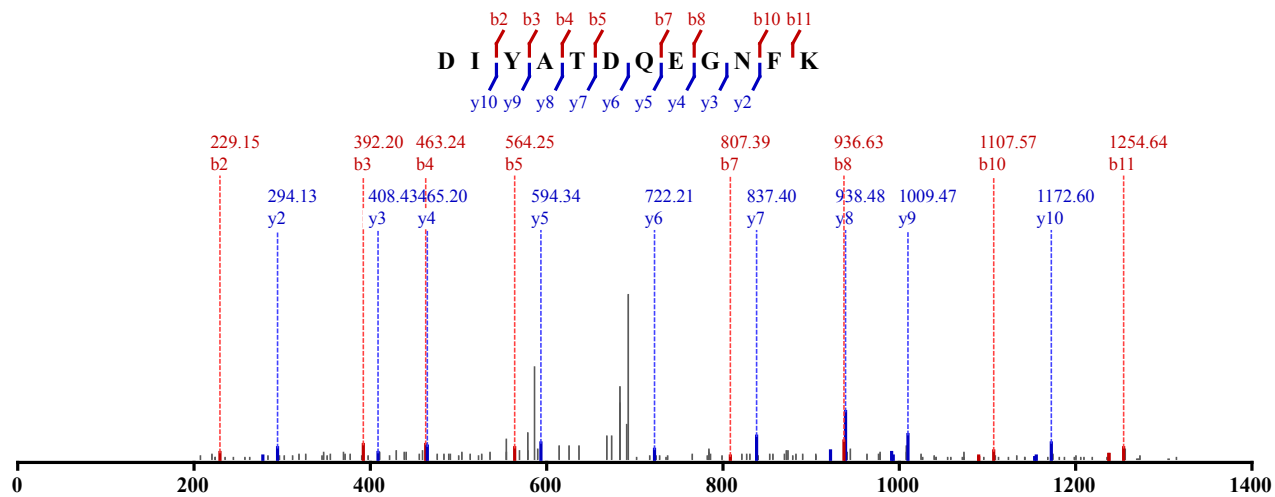

Not Modified

Identified in MSS481 with qvalue 0.00

Charge: 2, Exp. m/z: 700.822, Calc. m/z: 700.822

Data File: HeLa\_LysC\_pH4\_CID\_3xload\_2, Scans: 12374 - 12374

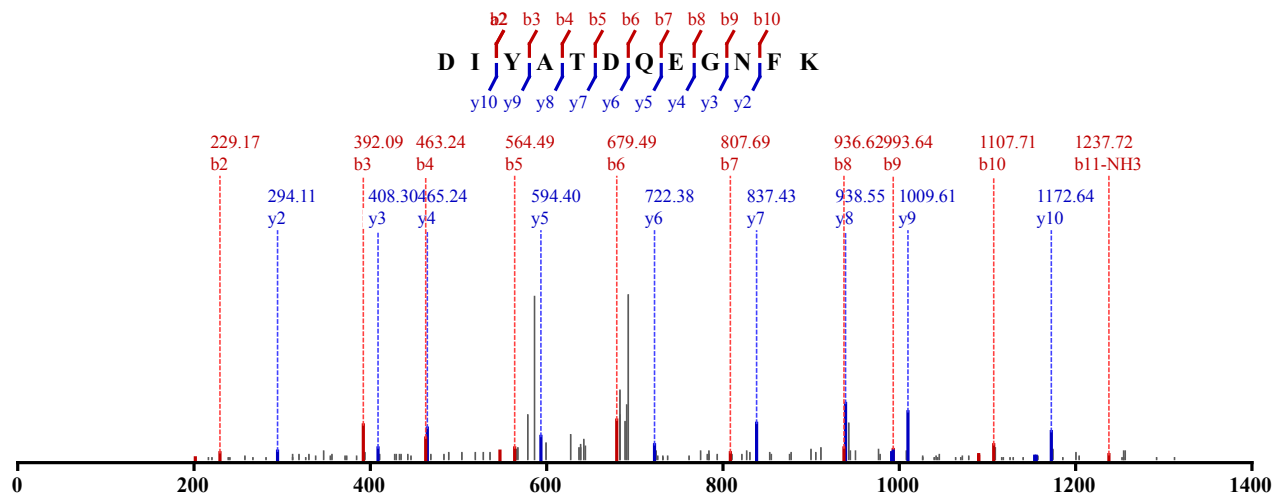

Not Modified

Identified in MSS481 with qvalue 0.00

Charge: 2, Exp. m/z: 700.821, Calc. m/z: 700.822

Data File: HeLa\_LysC\_pH4\_CID\_3xload, Scans: 12687 - 12687

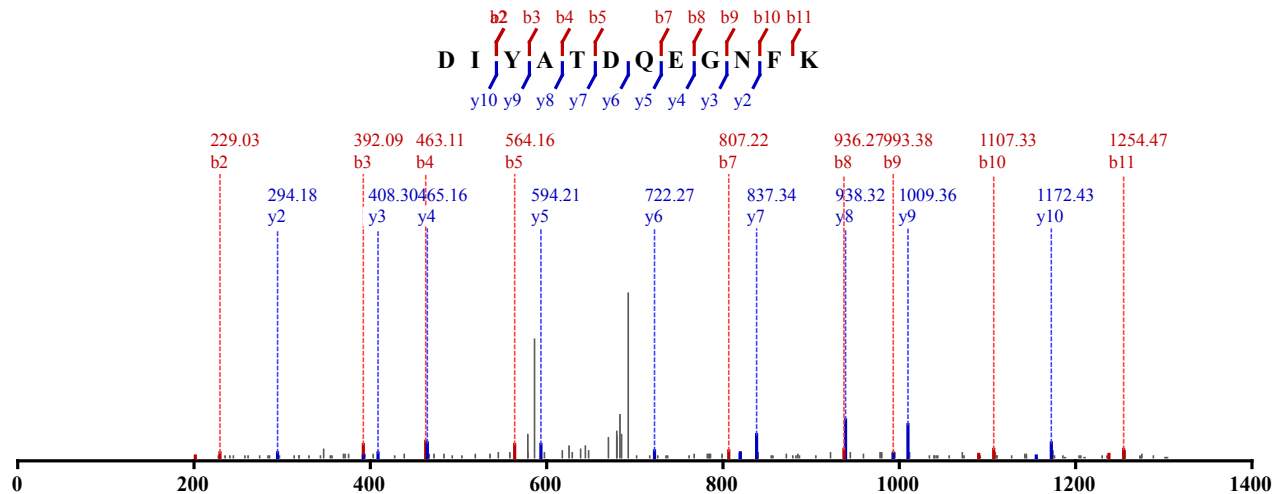

Not Modified

Identified in MSS484 with qvalue 0.00

Charge: 2, Exp. m/z: 700.819, Calc. m/z: 700.822

Data File: HeLa\_Try\_pH4\_HCD\_3, Scans: 26490 - 26490

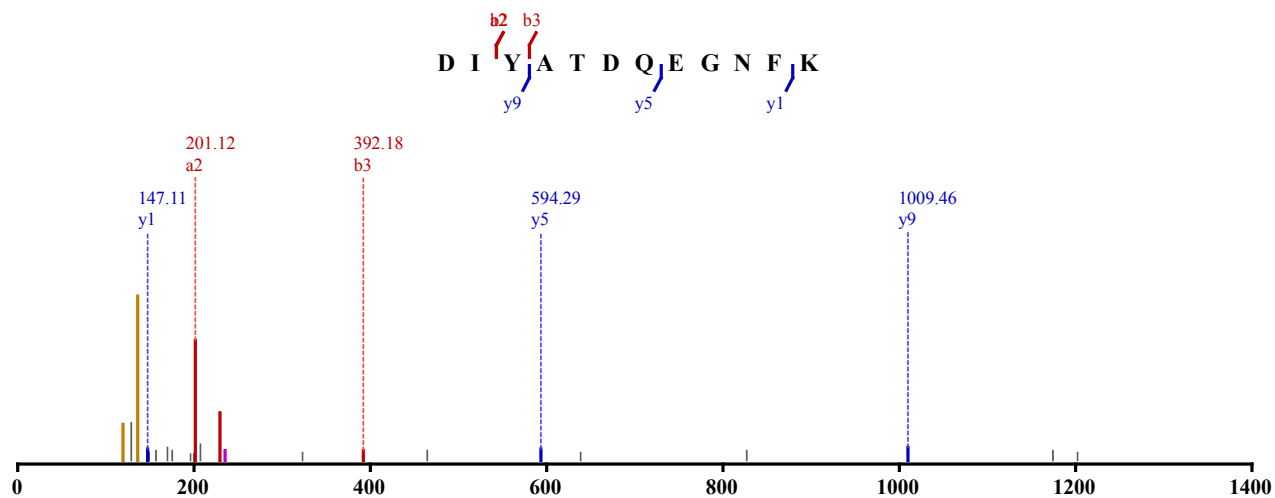

Not Modified

Identified in MSS484 with qvalue 0.00

Charge: 2, Exp. m/z: 700.819, Calc. m/z: 700.822

Data File: HeLa\_Try\_pH4\_HCD\_2, Scans: 27100 - 27100

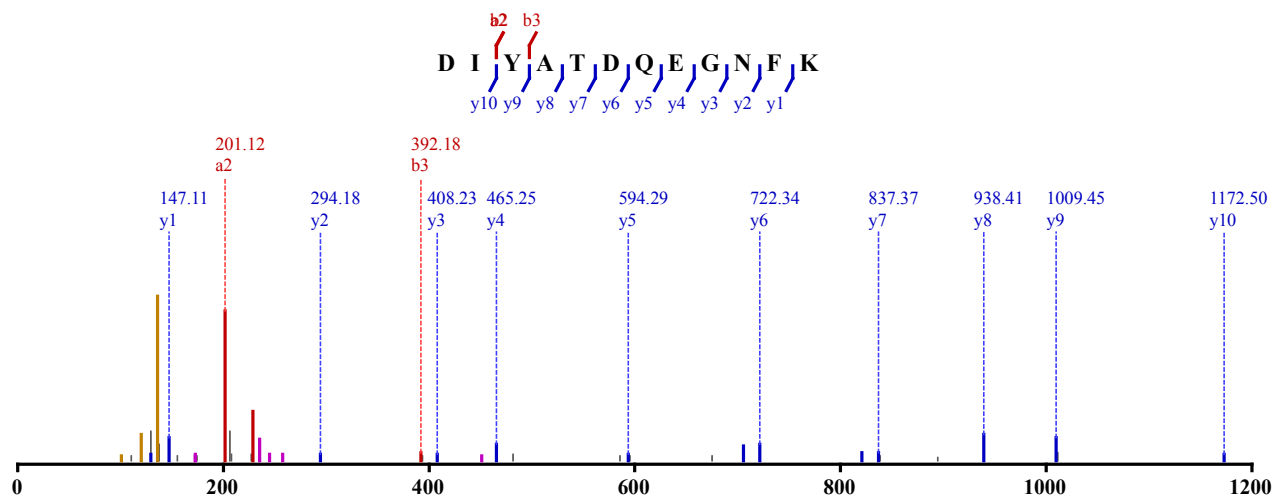

Not Modified

Identified in MSS485 with qvalue 0.00

Charge: 2, Exp. m/z: 700.820, Calc. m/z: 700.822

Data File: HeLa\_LysC\_pH4\_HCD\_1, Scans: 26946 - 26946

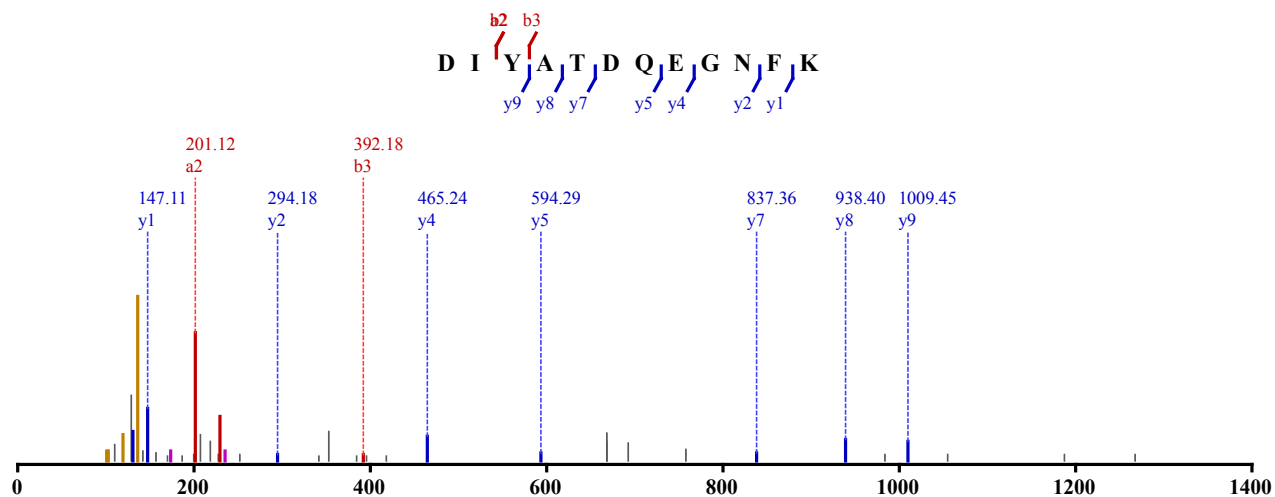

Not Modified

Identified in MSS485 with qvalue 0.00  
 Charge: 2, Exp. m/z: 700.820, Calc. m/z: 700.822  
 Data File: HeLa\_LysC\_pH4\_HCD\_1, Scans: 27036 - 27036

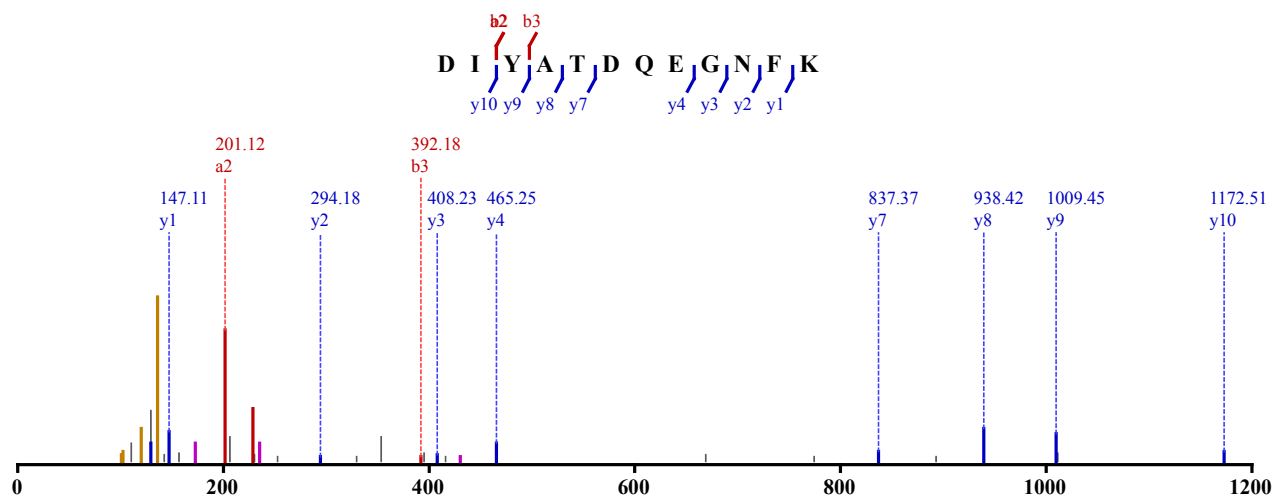

Not Modified  
 Identified in MSS485 with qvalue 0.00  
 Charge: 2, Exp. m/z: 700.821, Calc. m/z: 700.822  
 Data File: HeLa\_LysC\_pH4\_HCD\_2, Scans: 25433 - 25433

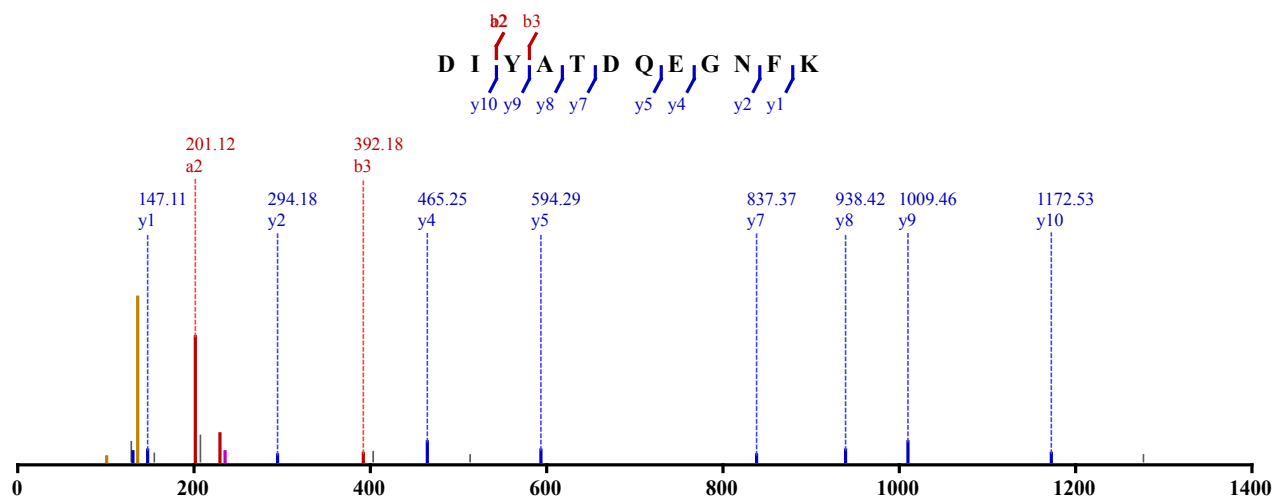

Not Modified  
 Identified in MSS485 with qvalue 0.00  
 Charge: 2, Exp. m/z: 700.819, Calc. m/z: 700.822  
 Data File: HeLa\_LysC\_pH4\_HCD\_3, Scans: 25923 - 25923

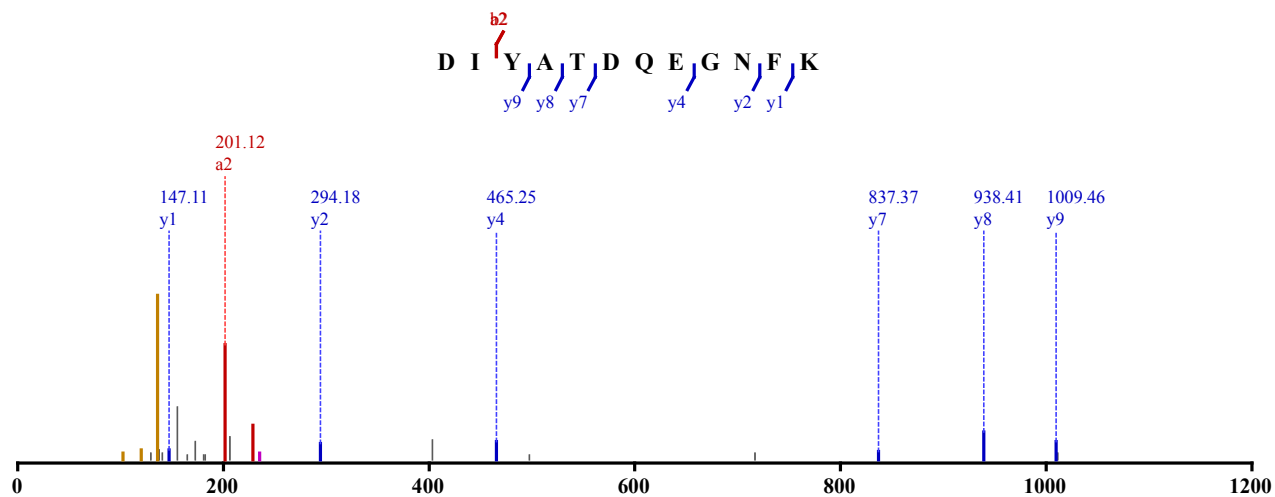

Not Modified

Identified in MSS479 with qvalue 0.00

Charge: 4, Exp. m/z: 927.647, Calc. m/z: 927.647

Data File: HeLa\_AspN\_pH3\_HCD\_1, Scans: 17846 - 17846

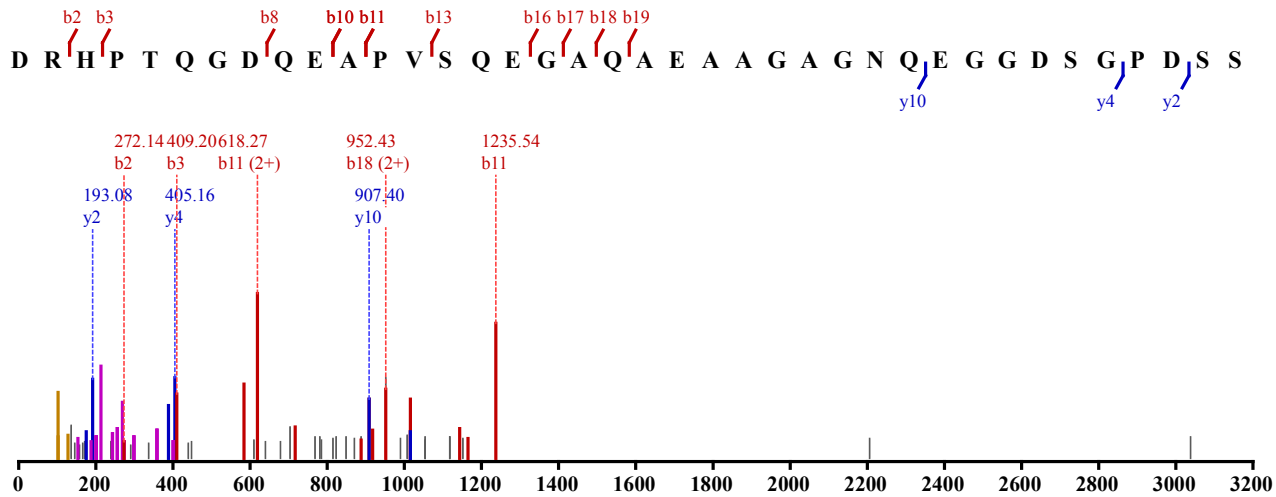

Not Modified

Identified in MSS479 with qvalue 0.00

Charge: 3, Exp. m/z: 1236.530, Calc. m/z: 1236.527

Data File: HeLa\_AspN\_pH3\_HCD\_1, Scans: 17854 - 17854

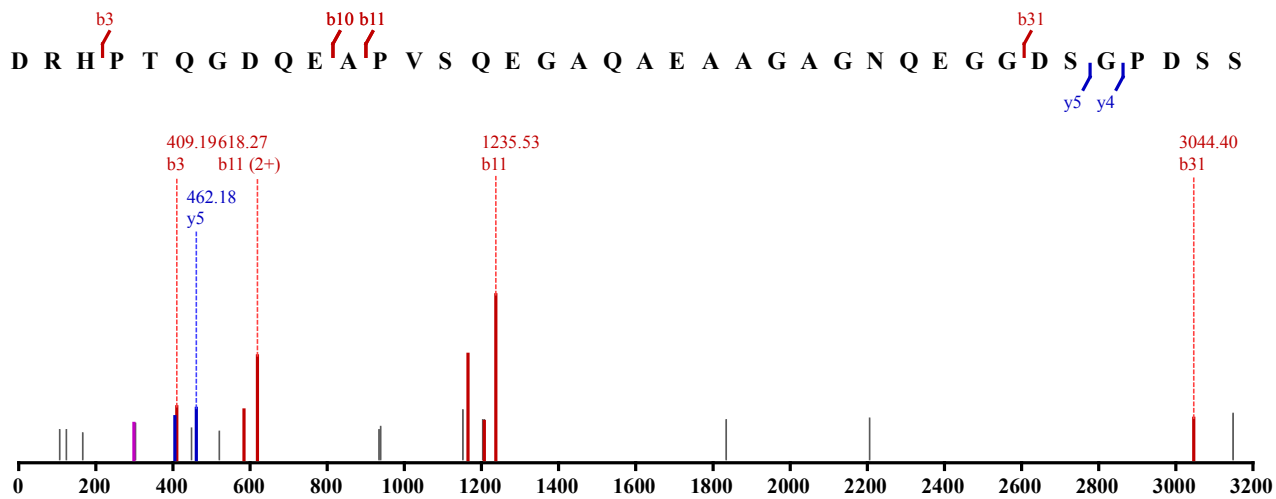

Not Modified

Identified in MSS481 with qvalue 0.00

Charge: 2, Exp. m/z: 585.332, Calc. m/z: 585.332

Data File: HeLa\_LysC\_pH5\_CID\_3xload\_3, Scans: 30122 - 30122

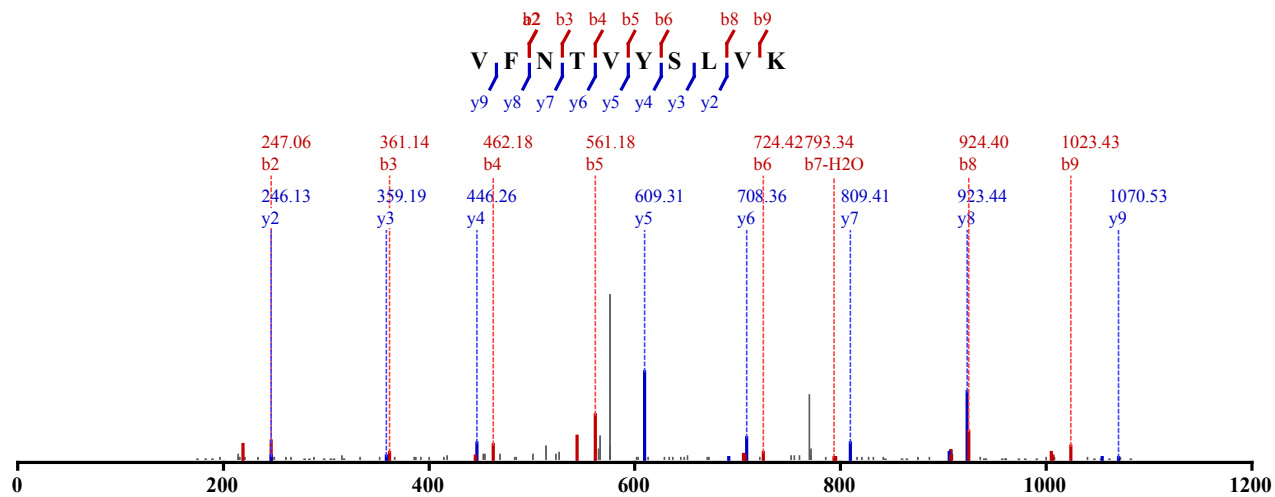

Not Modified  
 Identified in MSS481 with qvalue 0.00  
 Charge: 2, Exp. m/z: 585.333, Calc. m/z: 585.332  
 Data File: HeLa\_LysC\_pH4\_CID\_3xload\_3, Scans: 26731 - 26731

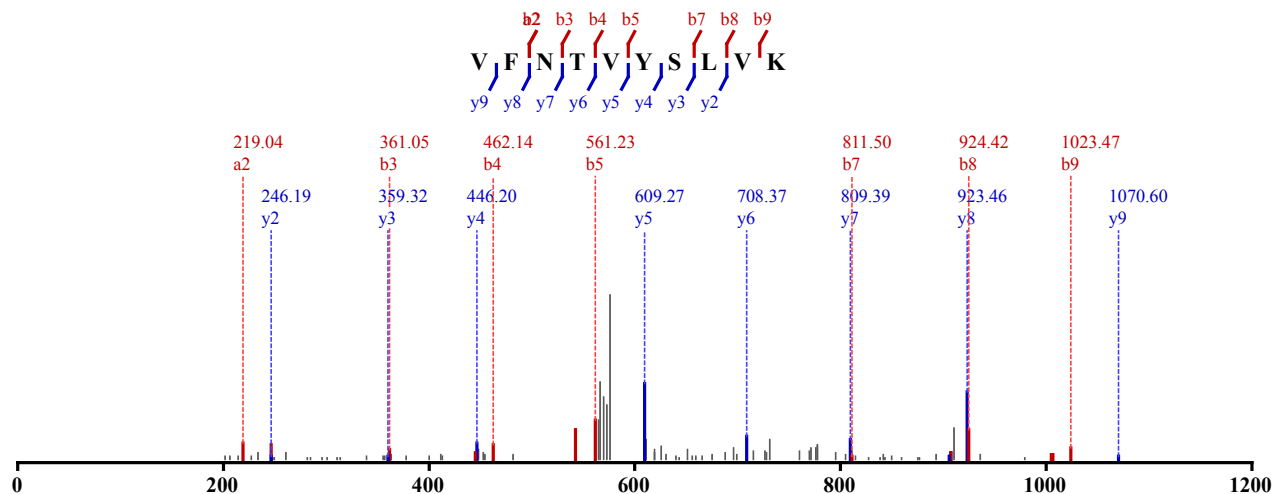

Not Modified  
 Identified in MSS480 with qvalue 0.00  
 Charge: 3, Exp. m/z: 626.625, Calc. m/z: 626.624  
 Data File: HeLa\_try\_pH4\_CID\_3xload\_2, Scans: 20458 - 20458

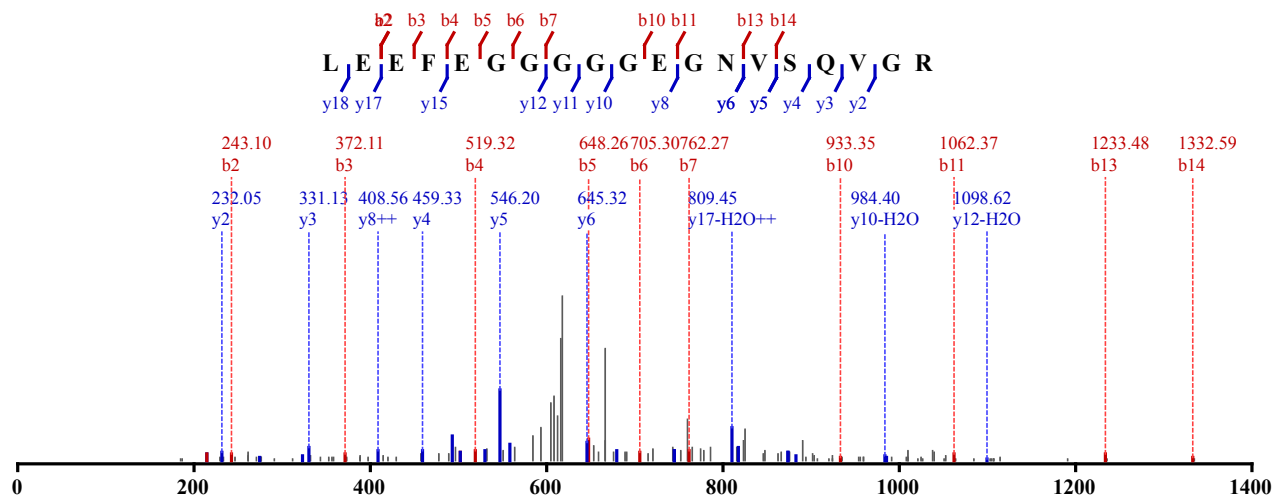

Not Modified  
 Identified in MSS484 with qvalue 0.00  
 Charge: 2, Exp. m/z: 939.435, Calc. m/z: 939.437



Data File: HeLa\_Try\_pH4\_HCD\_3, Scans: 26482 - 26482

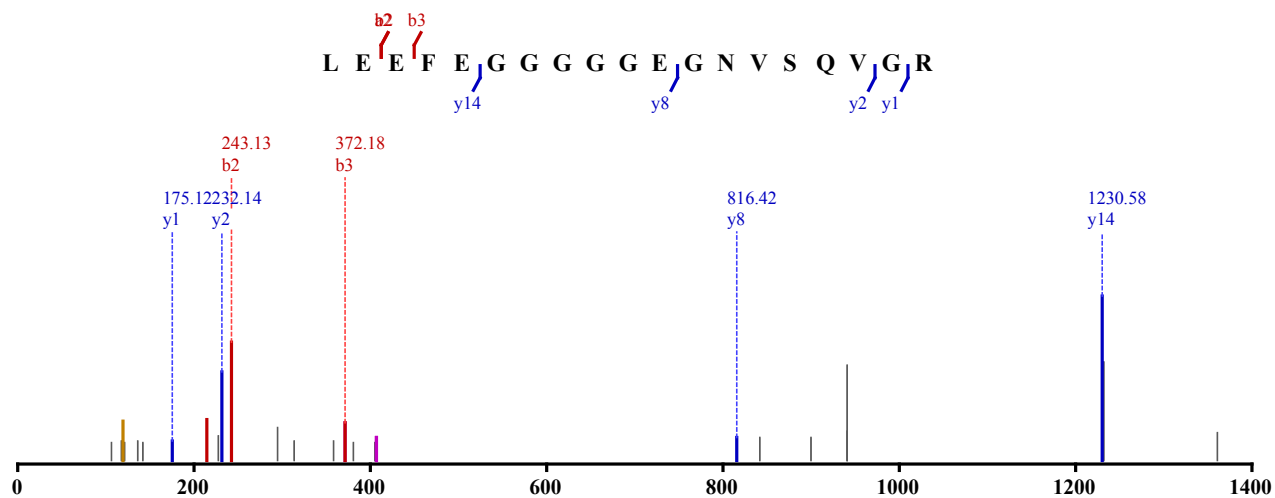

Not Modified

Identified in MSS484 with qvalue 0.00

Charge: 2, Exp. m/z: 939.435, Calc. m/z: 939.432

Data File: HeLa\_Try\_pH4\_HCD\_1, Scans: 32382 - 32382

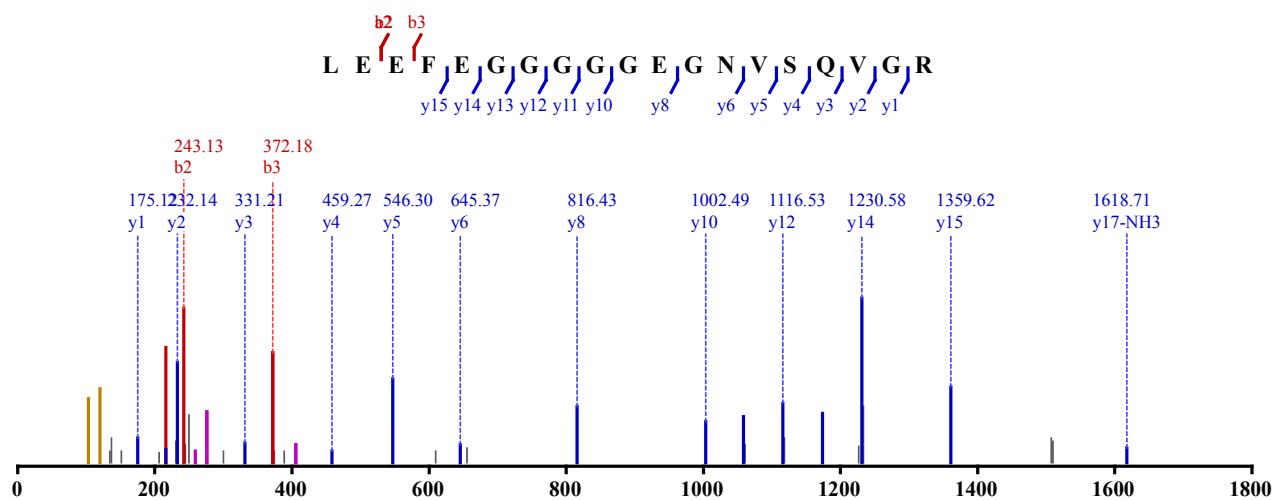

Not Modified

Identified in MSS484 with qvalue 0.00

Charge: 2, Exp. m/z: 939.437, Calc. m/z: 939.432

Data File: HeLa\_Try\_pH4\_HCD\_2, Scans: 27073 - 27073

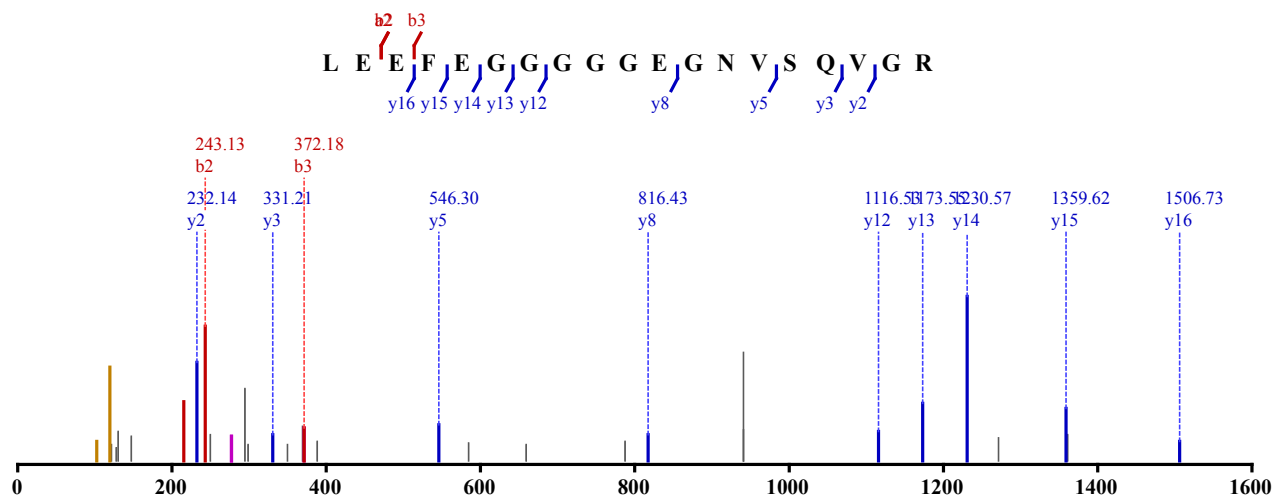

1 x Glu->pyro-Glu (N-term E)

Identified in MSS480 with qvalue 0.01  
 Charge: 2, Exp. m/z: 888.471, Calc. m/z: 888.472  
 Data File: HeLa\_try\_pH3\_CID\_3xload, Scans: 56951 - 56951

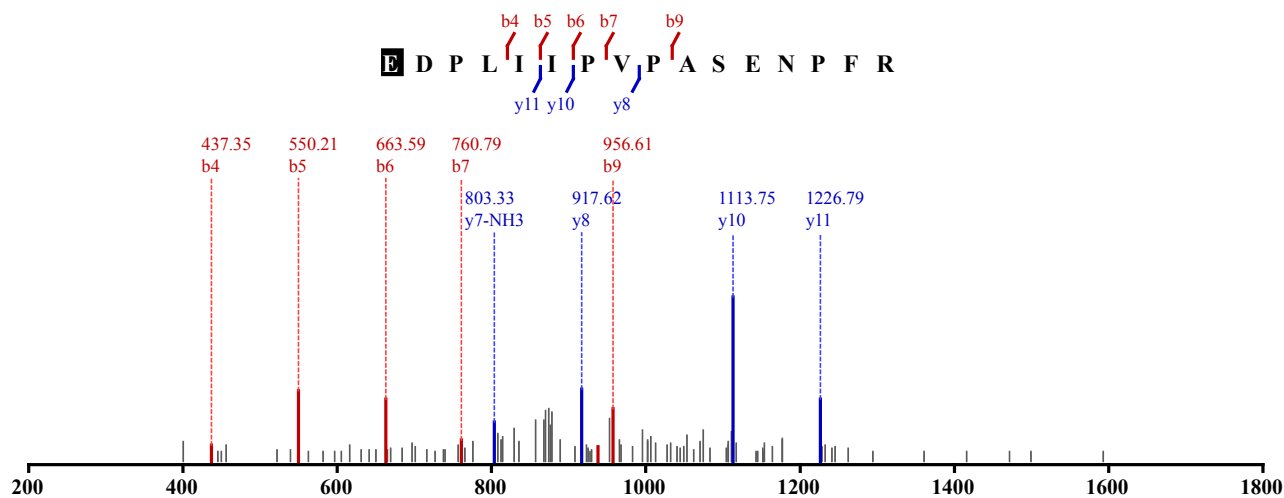

Not Modified  
 Identified in MSS480 with qvalue 0.00  
 Charge: 2, Exp. m/z: 897.477, Calc. m/z: 897.477  
 Data File: HeLa\_try\_pH3\_CID\_3xload\_3, Scans: 51288 - 51288

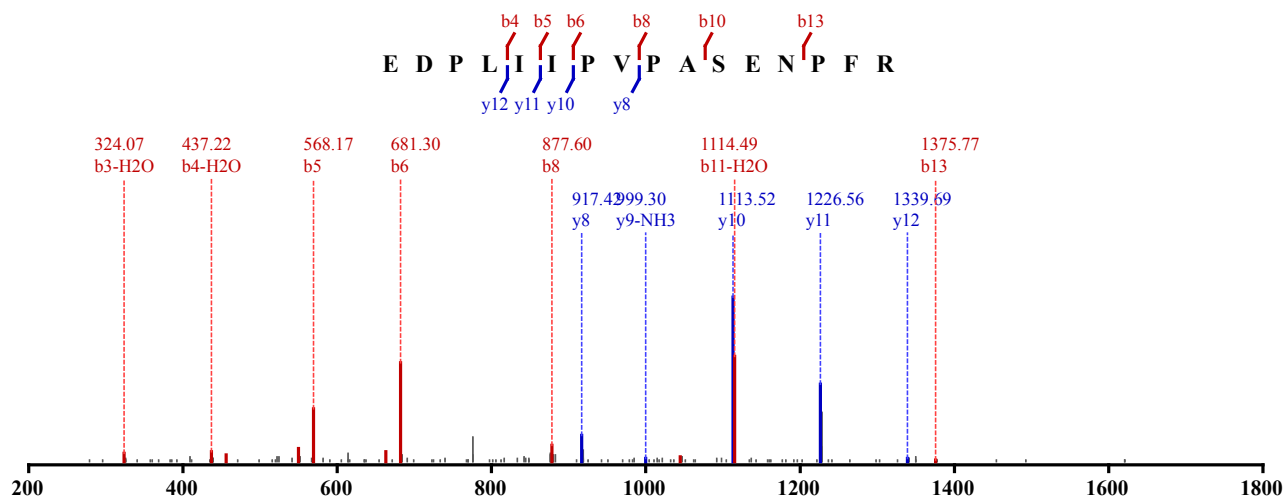

Not Modified  
 Identified in MSS484 with qvalue 0.00  
 Charge: 3, Exp. m/z: 598.653, Calc. m/z: 598.654  
 Data File: HeLa\_Try\_pH3\_HCD\_1, Scans: 57695 - 57695

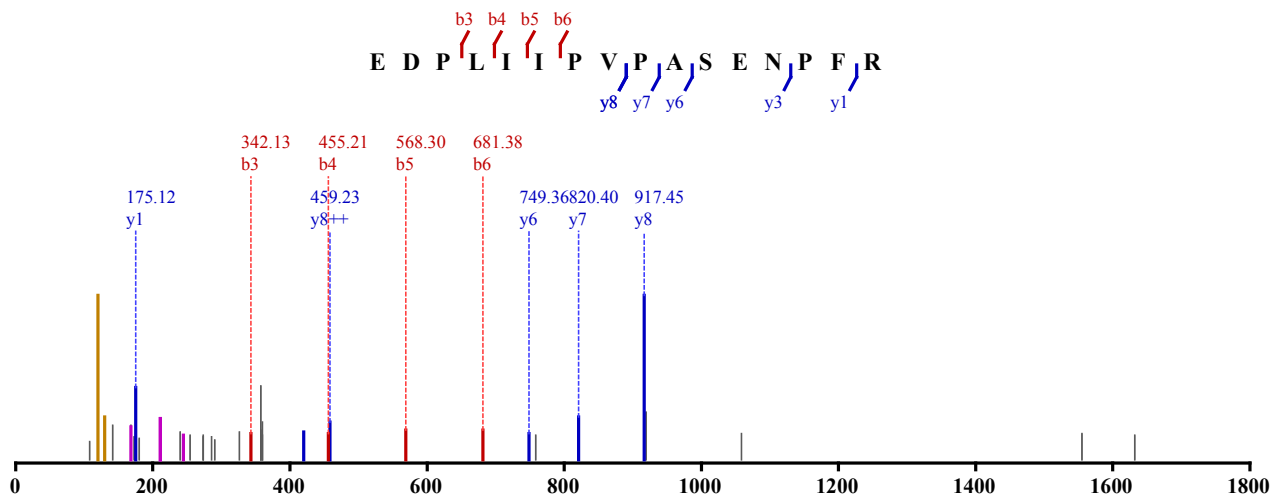

Not Modified

Identified in MSS484 with qvalue 0.00

Charge: 3, Exp. m/z: 598.653, Calc. m/z: 598.654

Data File: HeLa\_Try\_pH3\_HCD\_2, Scans: 57428 - 57428

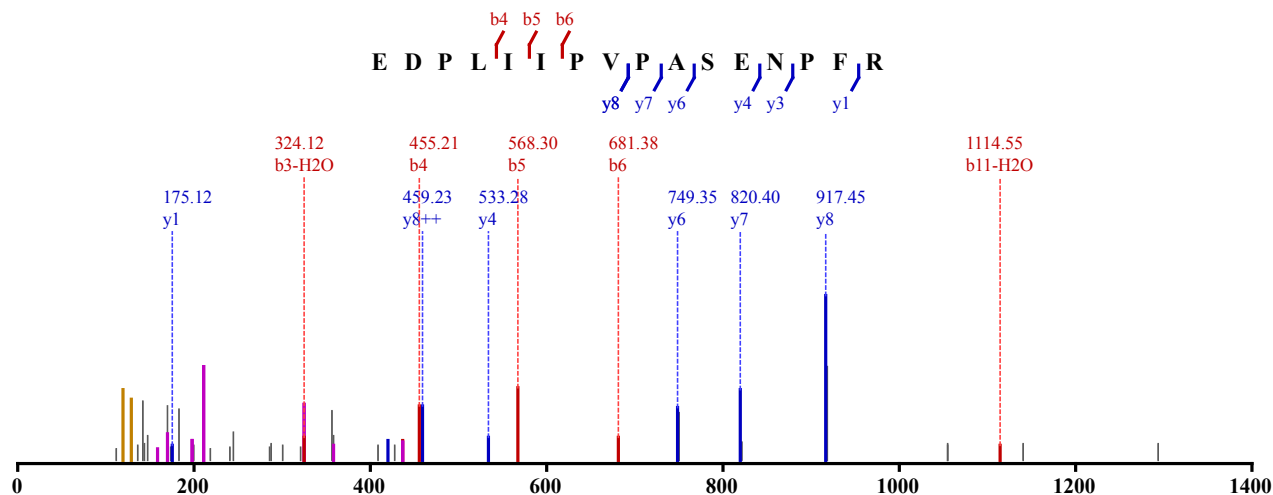

Not Modified

Identified in MSS484 with qvalue 0.00

Charge: 2, Exp. m/z: 897.475, Calc. m/z: 897.477

Data File: HeLa\_Try\_pH3\_HCD\_1, Scans: 57712 - 57712

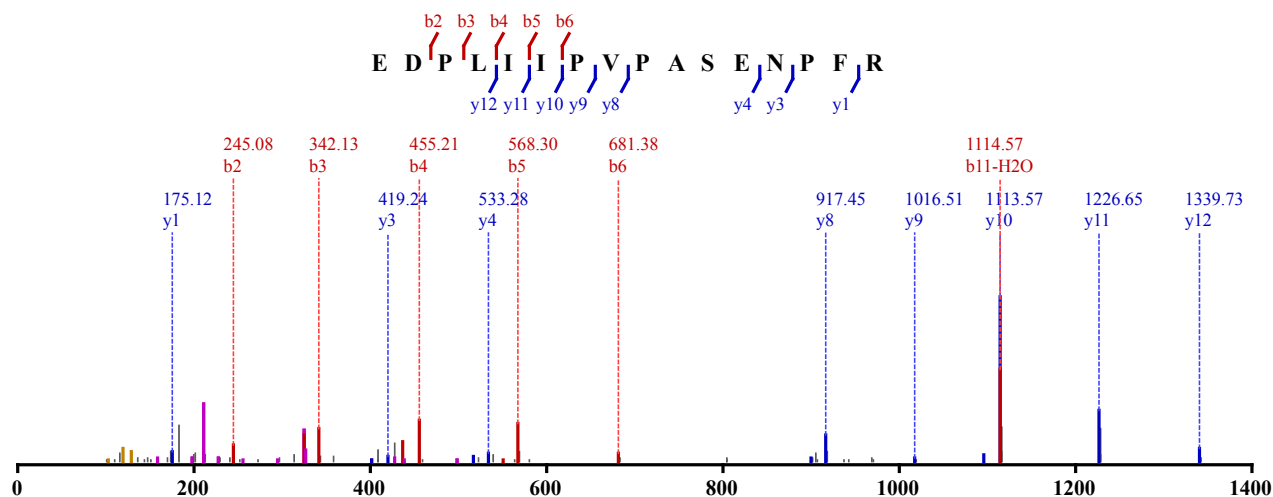

Not Modified

Identified in MSS484 with qvalue 0.00

Charge: 2, Exp. m/z: 897.478, Calc. m/z: 897.477

Data File: HeLa\_Try\_pH3\_HCD\_2, Scans: 57409 - 57409

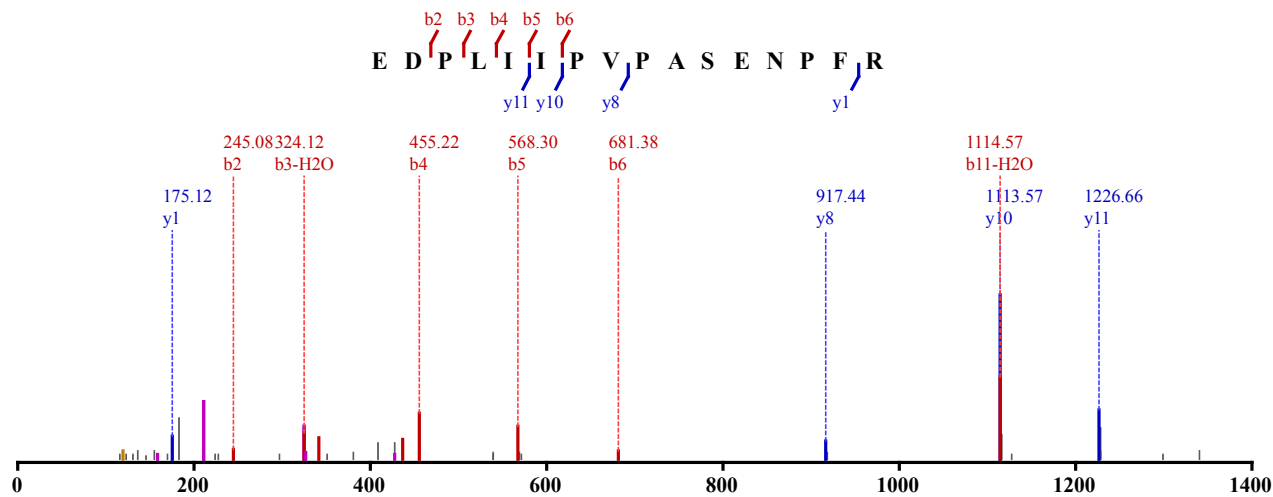

Not Modified  
 Identified in MSS484 with qvalue 0.00  
 Charge: 2, Exp. m/z: 897.475, Calc. m/z: 897.477  
 Data File: HeLa\_Try\_pH3\_HCD\_3, Scans: 55428 - 55428

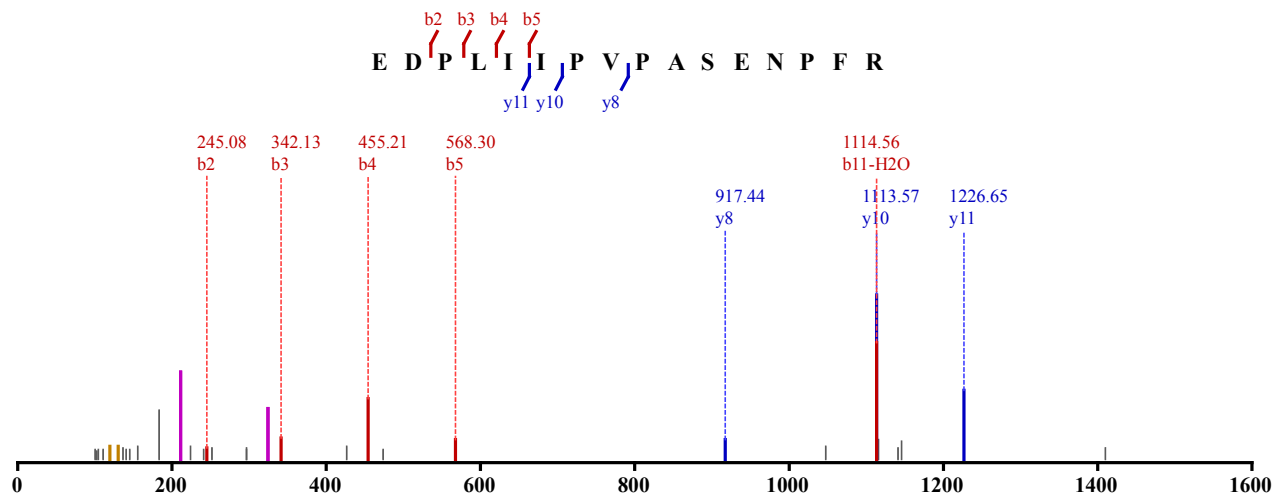

Not Modified  
 Identified in MSS481 with qvalue 0.00  
 Charge: 4, Exp. m/z: 583.827, Calc. m/z: 583.825  
 Data File: HeLa\_LysC\_80pcACN\_CID\_3xload\_3, Scans: 34094 - 34094

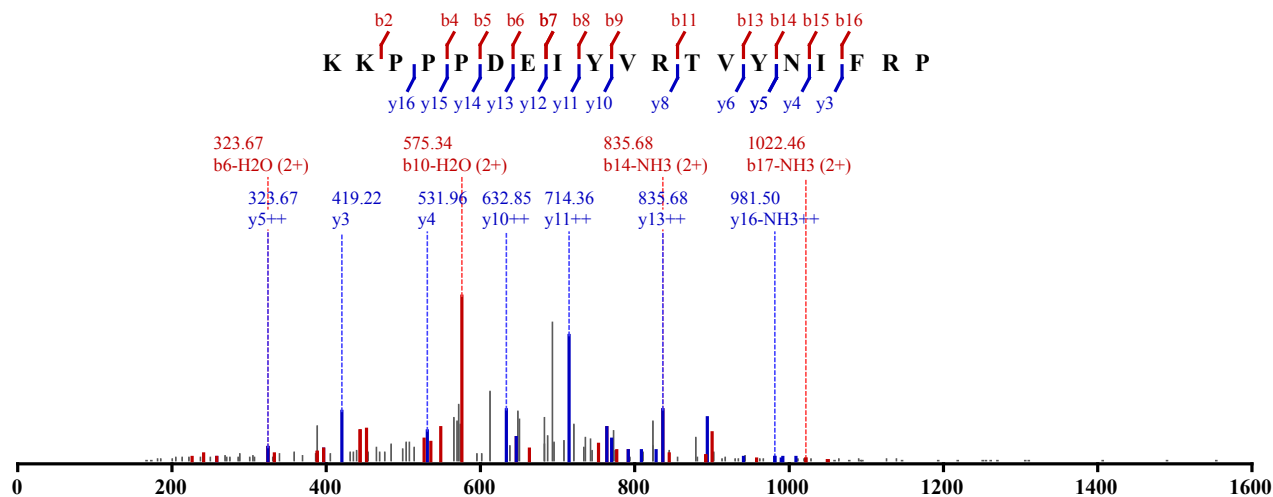

Not Modified  
 Identified in MSS481 with qvalue 0.00  
 Charge: 4, Exp. m/z: 584.076, Calc. m/z: 583.825

Data File: HeLa\_LysC\_80pcACN\_CID\_3xload, Scans: 32760 - 32760

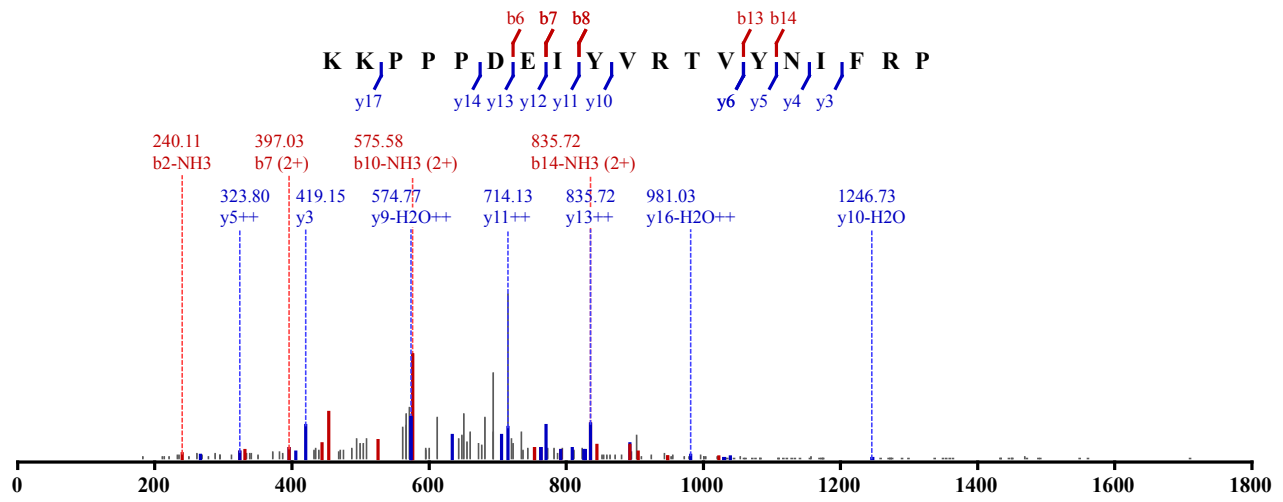

Not Modified

Identified in MSS481 with qvalue 0.00

Charge: 4, Exp. m/z: 583.558, Calc. m/z: 583.825

Data File: HeLa\_LysC\_80pcACN\_CID\_3xload\_3, Scans: 34154 - 34154

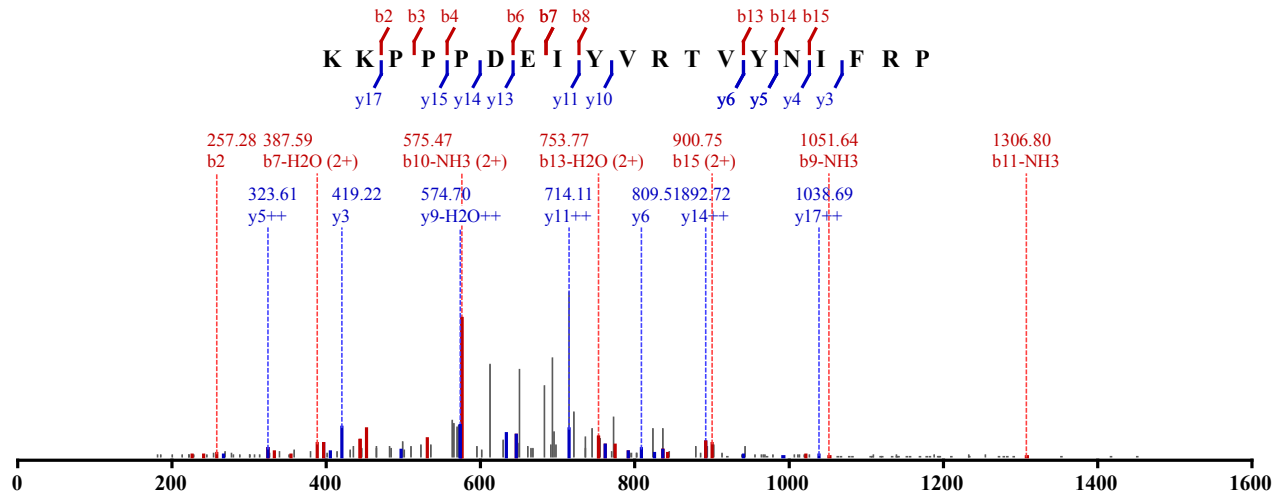

Not Modified

Identified in MSS485 with qvalue 0.00

Charge: 2, Exp. m/z: 548.812, Calc. m/z: 548.812

Data File: HeLa\_LysC\_pH11\_HCD\_2, Scans: 40579 - 40579

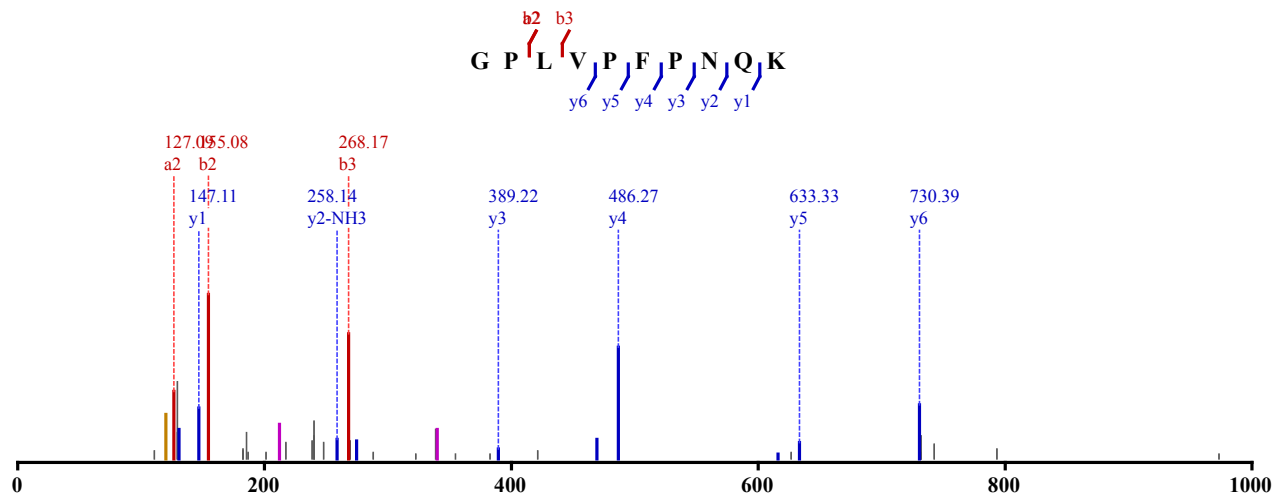

Not Modified

Identified in MSS485 with qvalue 0.00  
 Charge: 2, Exp. m/z: 548.812, Calc. m/z: 548.812  
 Data File: HeLa\_LysC\_pH11\_HCD\_3, Scans: 39633 - 39633

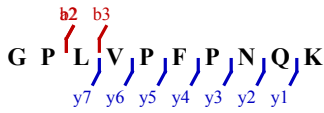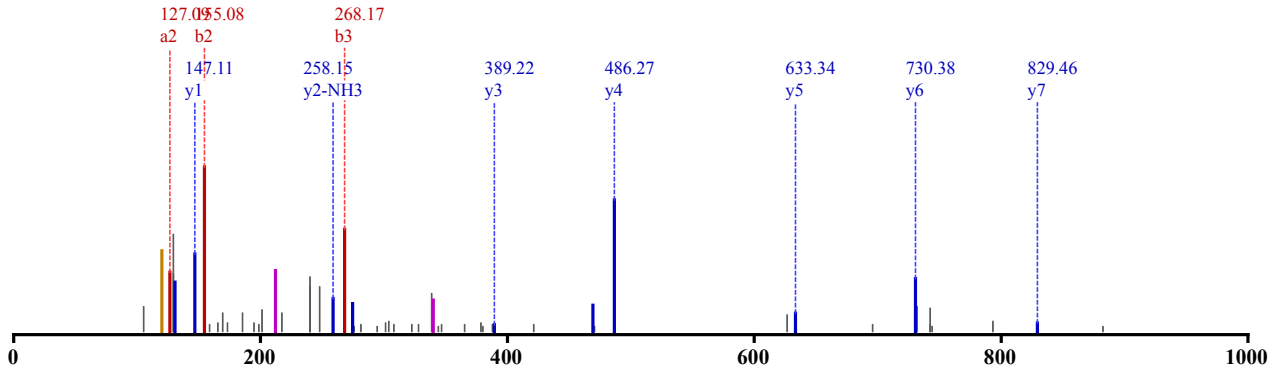

Not Modified  
 Identified in MSS485 with qvalue 0.00  
 Charge: 2, Exp. m/z: 548.812, Calc. m/z: 548.812  
 Data File: HeLa\_LysC\_pH11\_HCD\_3, Scans: 39533 - 39533

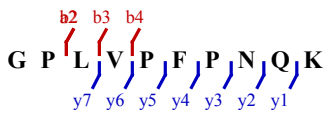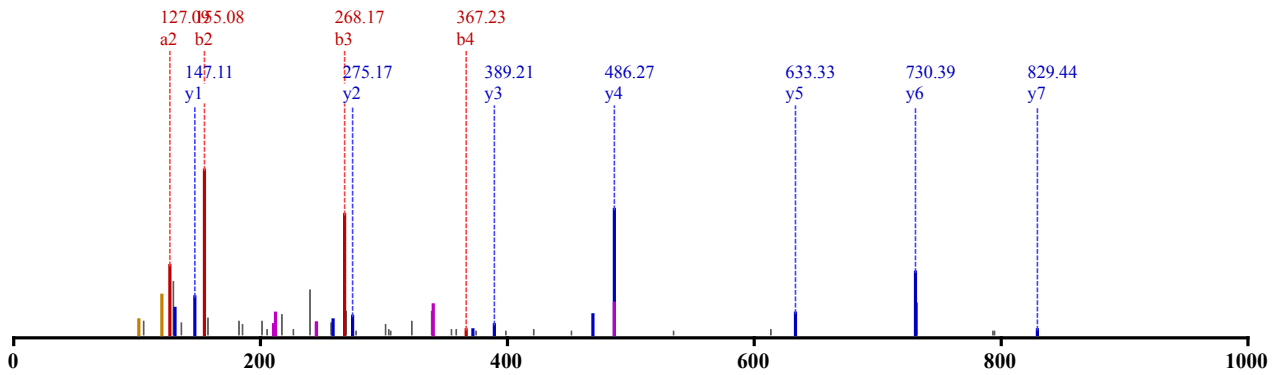

1 x Oxidation (M)  
 Identified in MSS481 with qvalue 0.00  
 Charge: 3, Exp. m/z: 586.946, Calc. m/z: 586.944  
 Data File: HeLa\_LysC\_pH3\_CID\_3xload\_2, Scans: 15053 - 15053

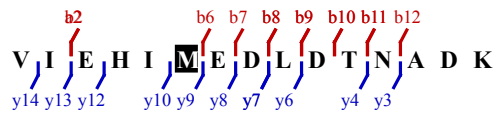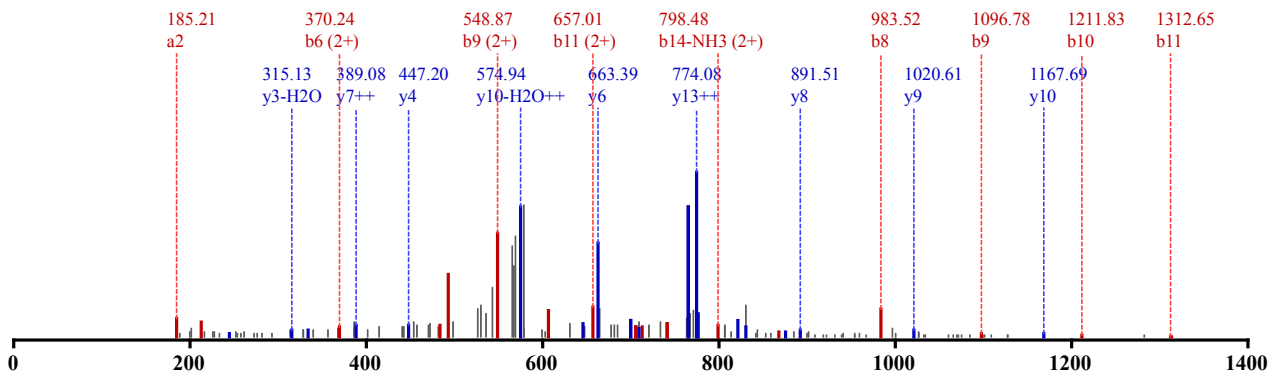

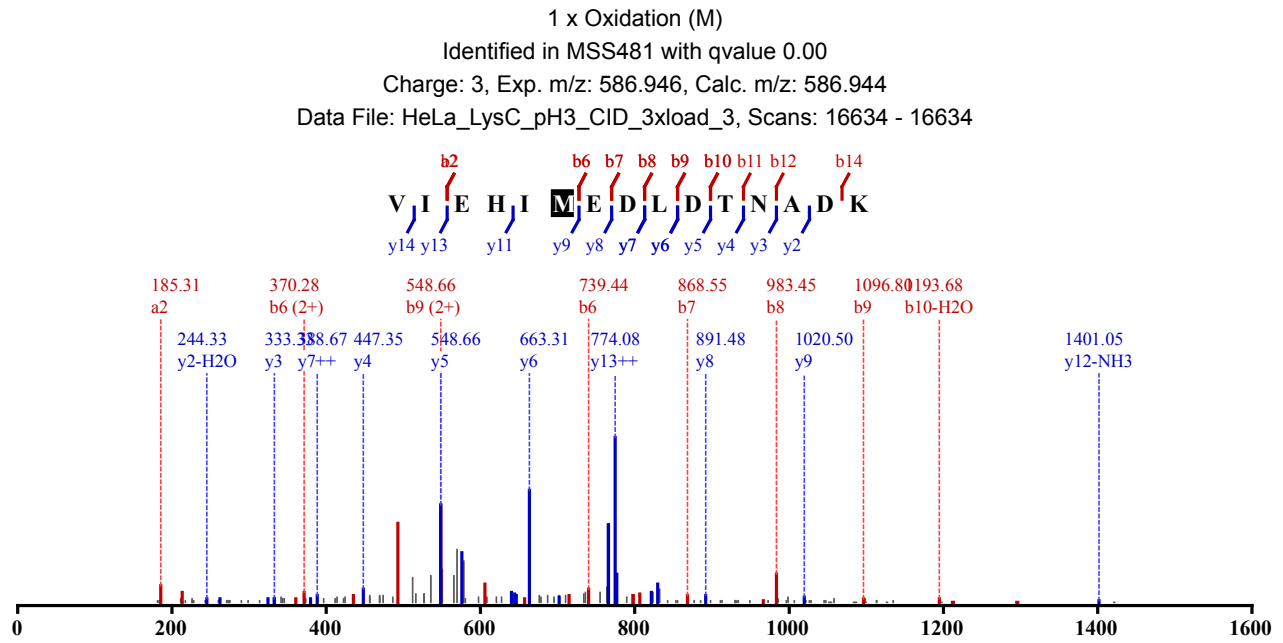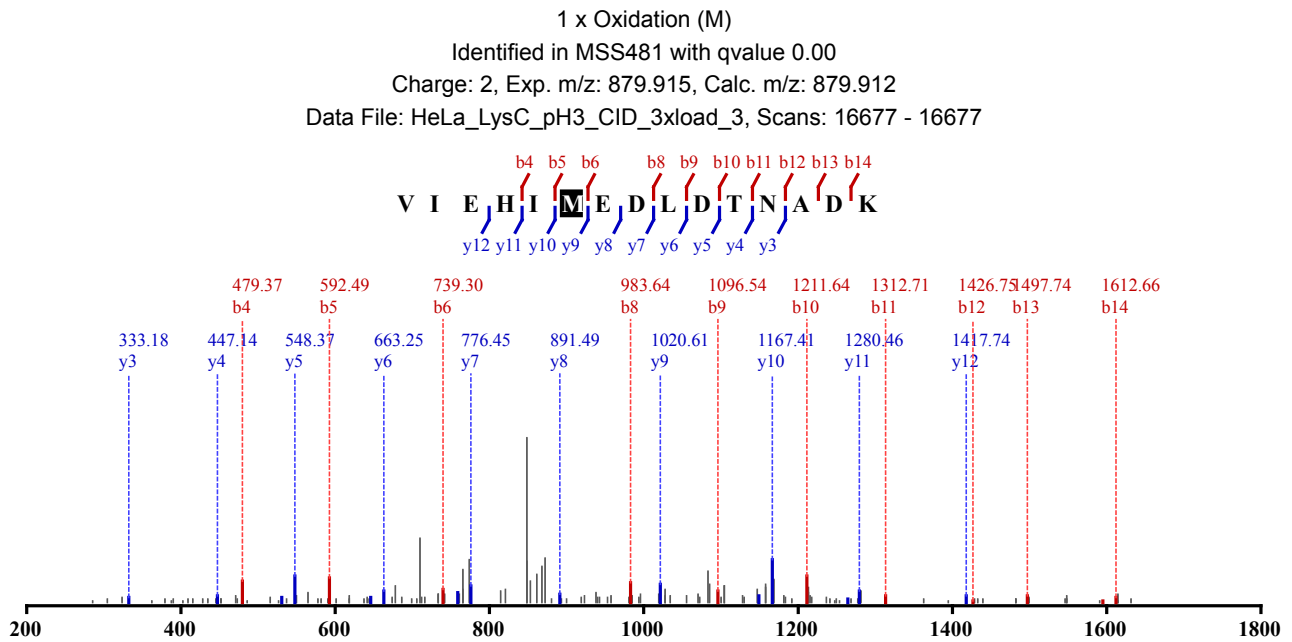

Not Modified  
 Identified in MSS485 with qvalue 0.00  
 Charge: 3, Exp. m/z: 581.610, Calc. m/z: 581.614  
 Data File: HeLa\_LysC\_pH3\_HCD\_2, Scans: 32178 - 32178

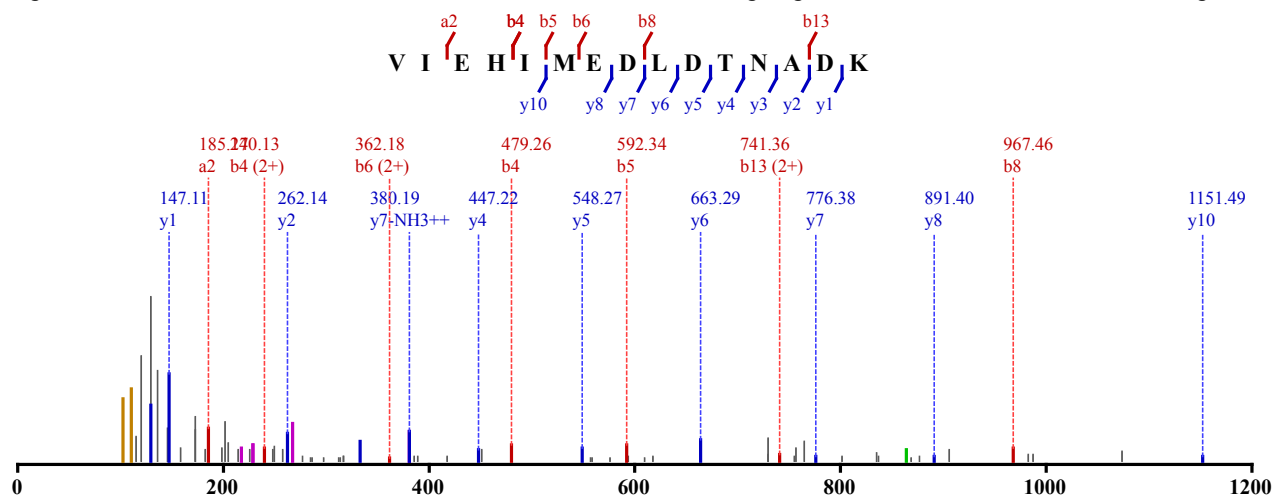

1 x Oxidation (M)

Identified in MSS485 with qvalue 0.00

Charge: 3, Exp. m/z: 586.946, Calc. m/z: 586.944

Data File: HeLa\_LysC\_pH3\_HCD\_2, Scans: 23646 - 23646

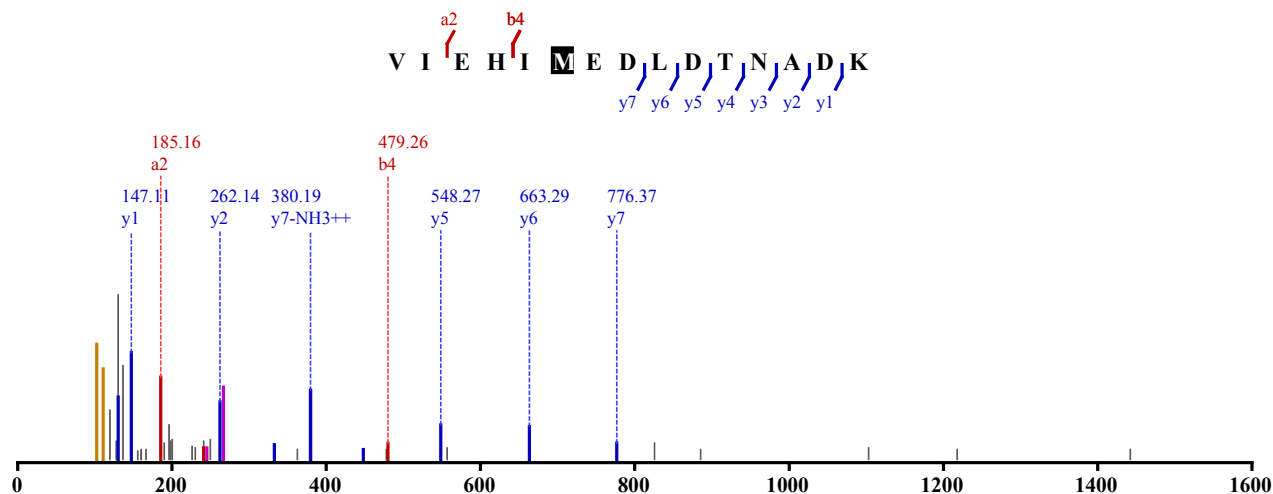

1 x Oxidation (M)

Identified in MSS485 with qvalue 0.00

Charge: 3, Exp. m/z: 586.946, Calc. m/z: 586.944

Data File: HeLa\_LysC\_pH3\_HCD\_2, Scans: 23878 - 23878

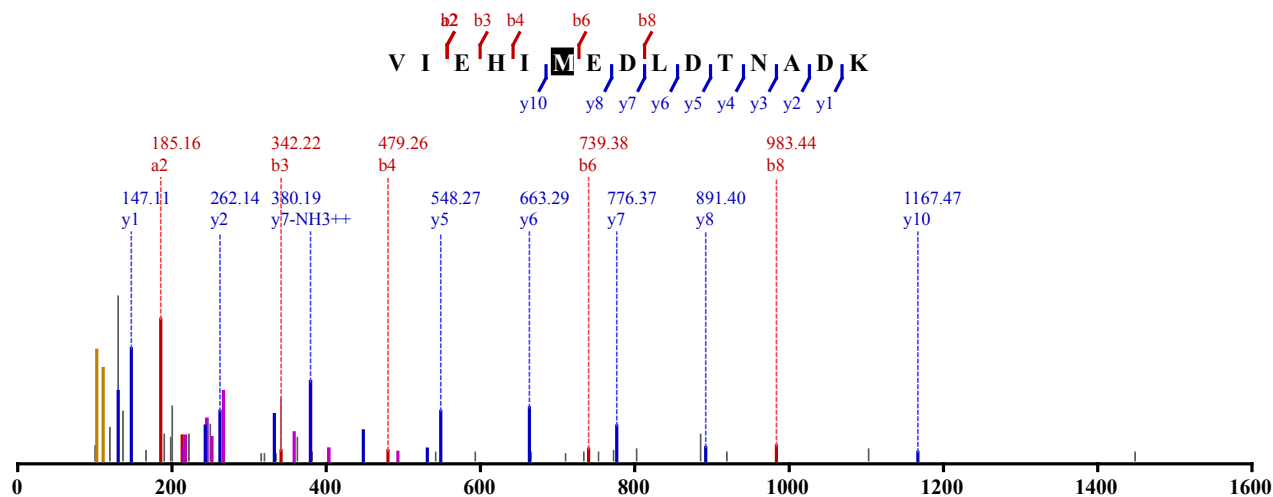

1 x Oxidation (M)

Identified in MSS485 with qvalue 0.00

Charge: 2, Exp. m/z: 879.914, Calc. m/z: 879.912



Data File: HeLa\_LysC\_pH3\_HCD\_1, Scans: 28032 - 28032

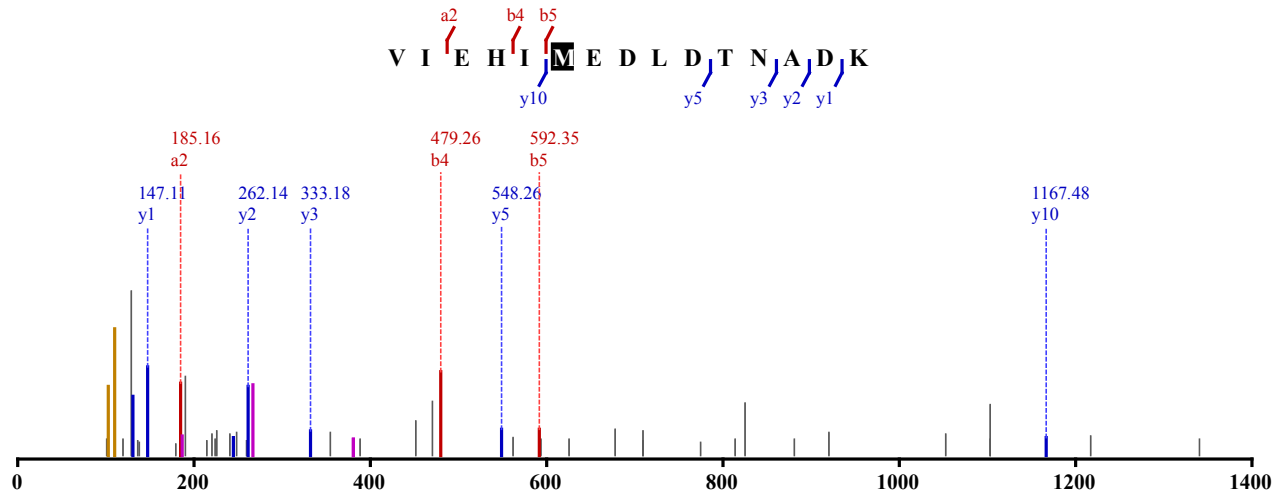

Not Modified

Identified in MSS479 with qvalue 0.00

Charge: 3, Exp. m/z: 447.581, Calc. m/z: 447.581

Data File: HeLa\_AspN\_pH11\_HCD\_1, Scans: 15990 - 15990

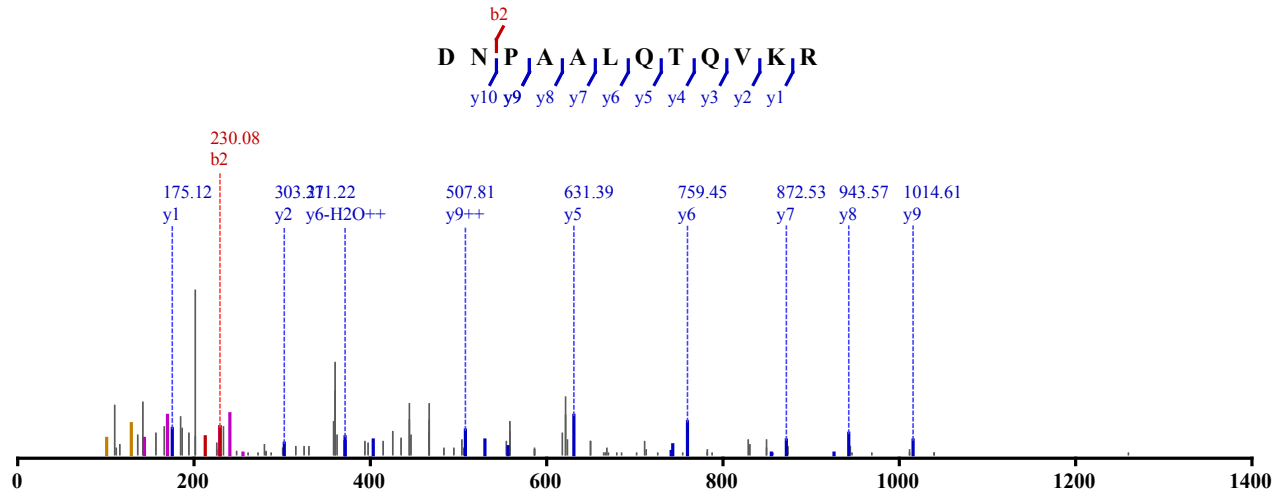

Not Modified

Identified in MSS479 with qvalue 0.00

Charge: 3, Exp. m/z: 447.581, Calc. m/z: 447.581

Data File: HeLa\_AspN\_pH11\_HCD\_2, Scans: 14762 - 14762

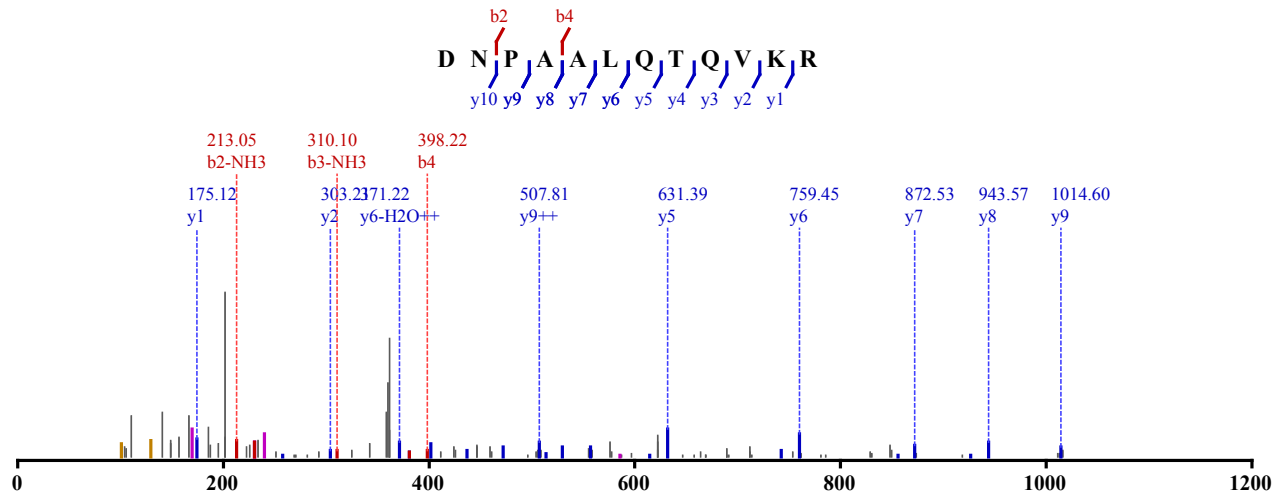

Not Modified

Identified in MSS479 with qvalue 0.00  
 Charge: 3, Exp. m/z: 447.580, Calc. m/z: 447.581  
 Data File: HeLa\_AspN\_pH11\_HCD\_3, Scans: 14374 - 14374

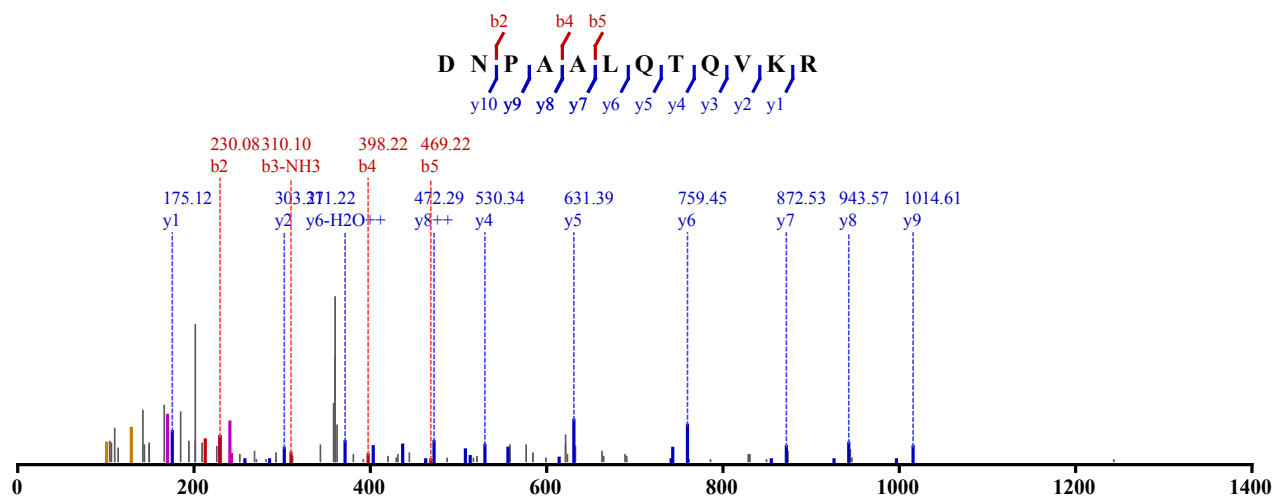

Not Modified  
 Identified in MSS479 with qvalue 0.00  
 Charge: 2, Exp. m/z: 670.867, Calc. m/z: 670.867  
 Data File: HeLa\_AspN\_pH11\_HCD\_1, Scans: 15946 - 15946

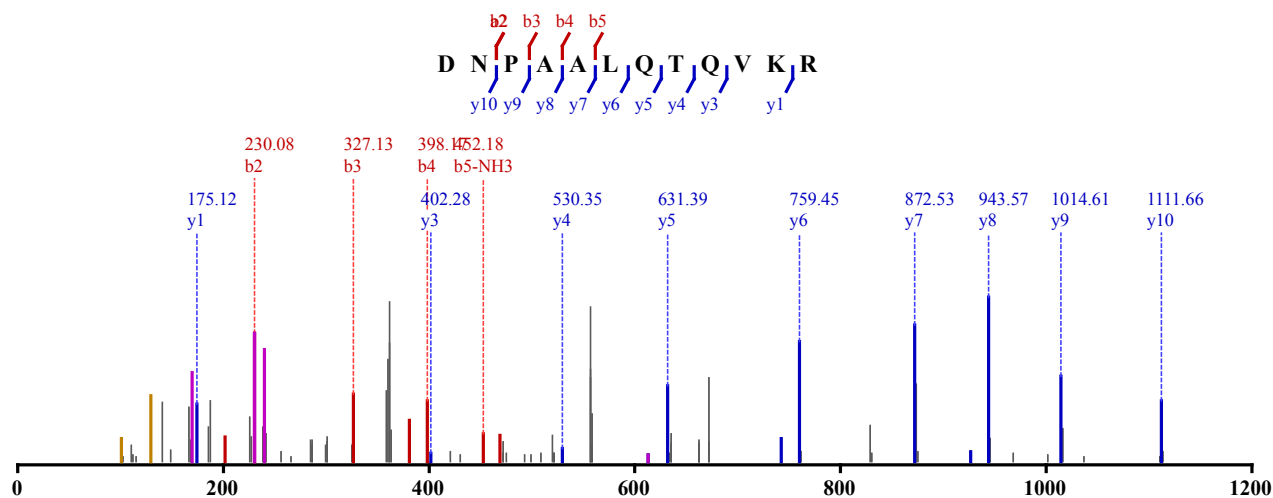

Not Modified  
 Identified in MSS479 with qvalue 0.00  
 Charge: 2, Exp. m/z: 670.867, Calc. m/z: 670.867  
 Data File: HeLa\_AspN\_pH11\_HCD\_2, Scans: 14732 - 14732

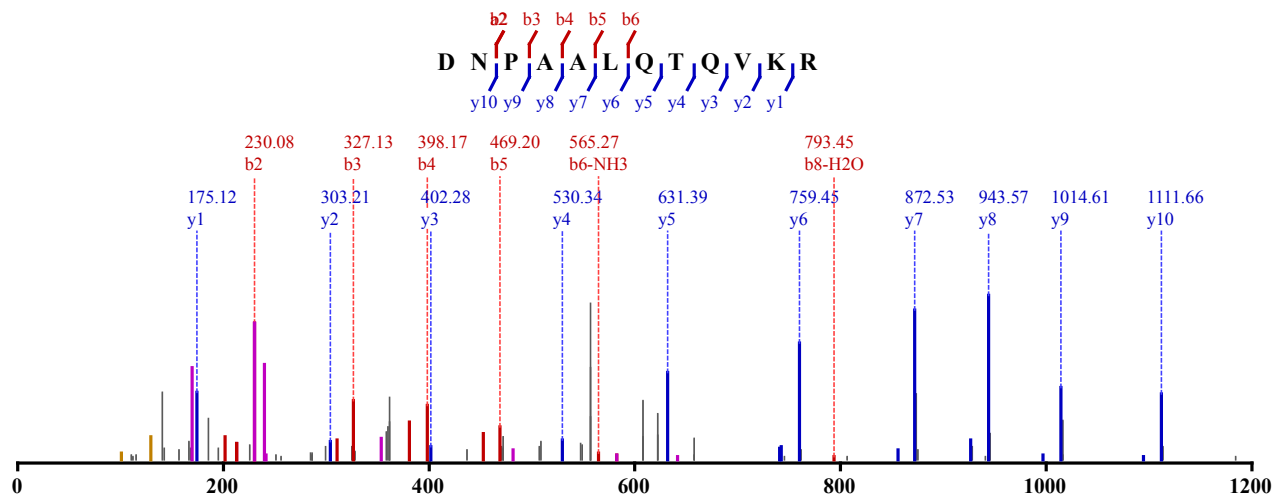

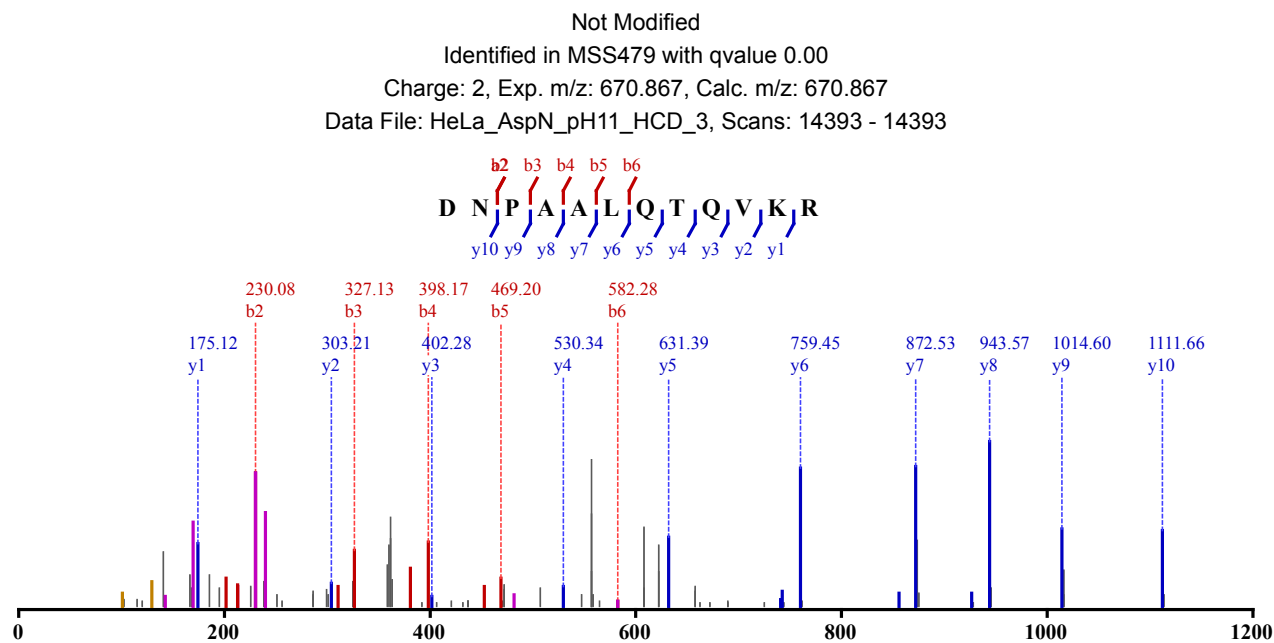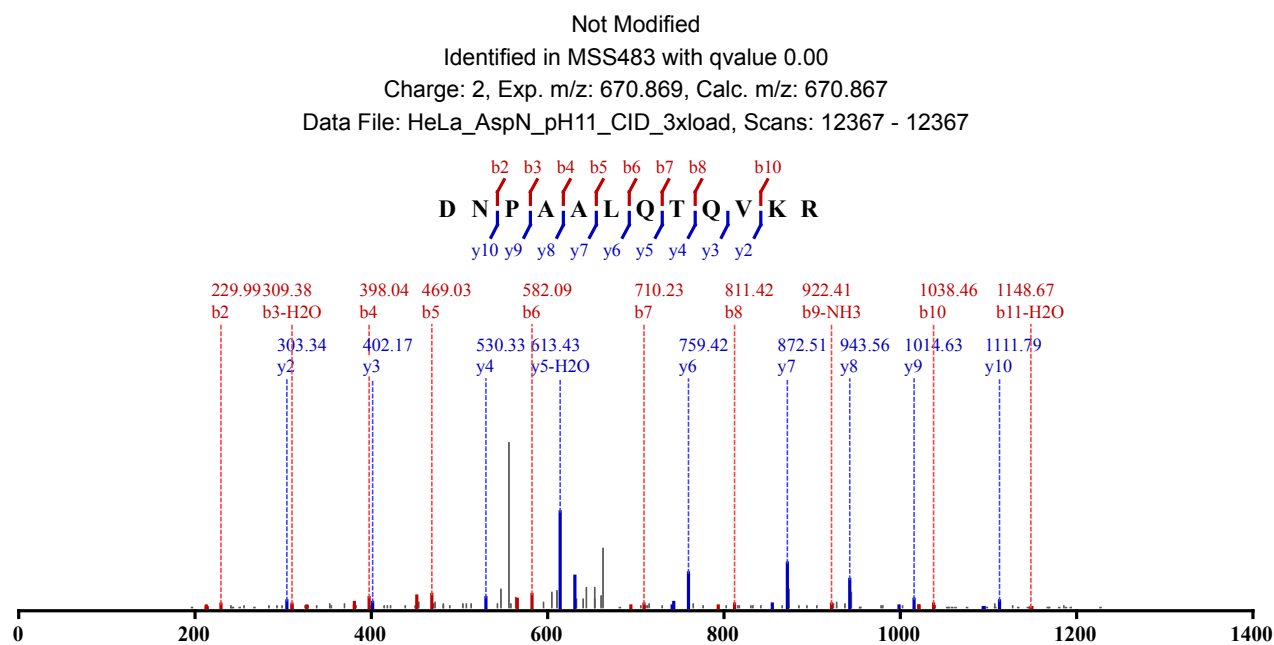

2 x Carbamidomethyl (C)  
 Identified in MSS30 with qvalue 0.00  
 Charge: 3, Exp. m/z: 871.999, Calc. m/z: 872.004  
 Data File: 20100611\_Velos1\_TaGe\_SA\_Hela\_6, Scans: 5412 - 5412

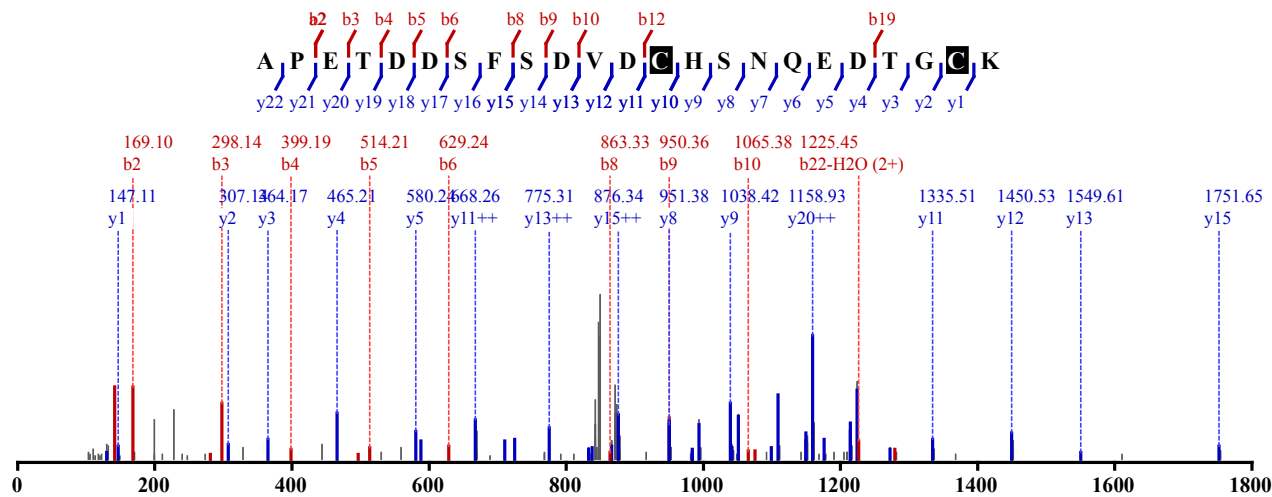

2 x Carbamidomethyl (C)  
 Identified in MSS485 with qvalue 0.00  
 Charge: 3, Exp. m/z: 872.000, Calc. m/z: 872.004  
 Data File: HeLa\_LysC\_pH3\_HCD\_2, Scans: 20320 - 20320

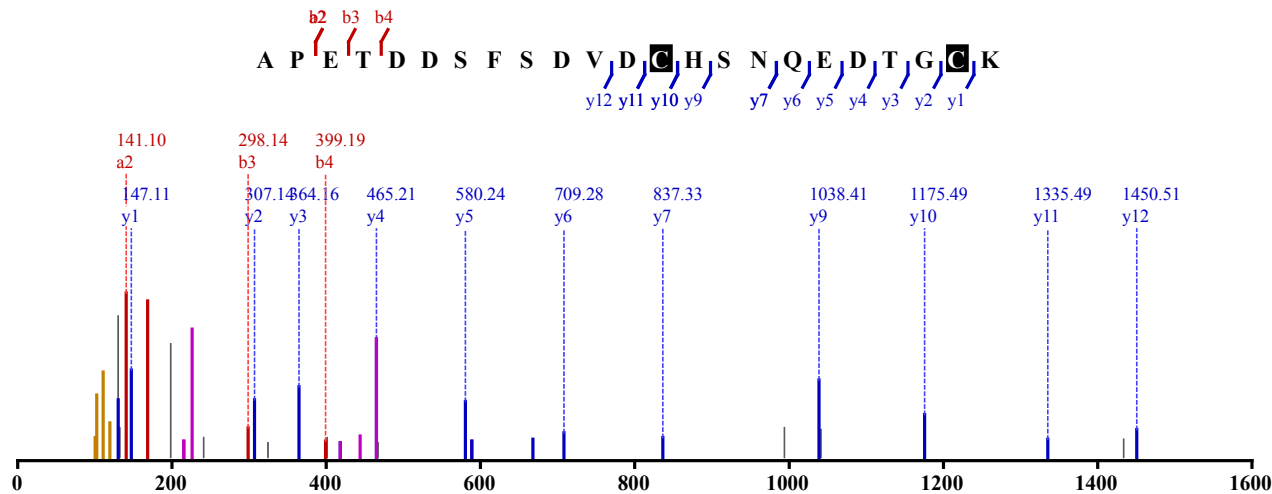

Not Modified  
 Identified in MSS479 with qvalue 0.00  
 Charge: 2, Exp. m/z: 478.792, Calc. m/z: 478.792  
 Data File: HeLa\_AspN\_pH5\_HCD\_1, Scans: 35962 - 35962

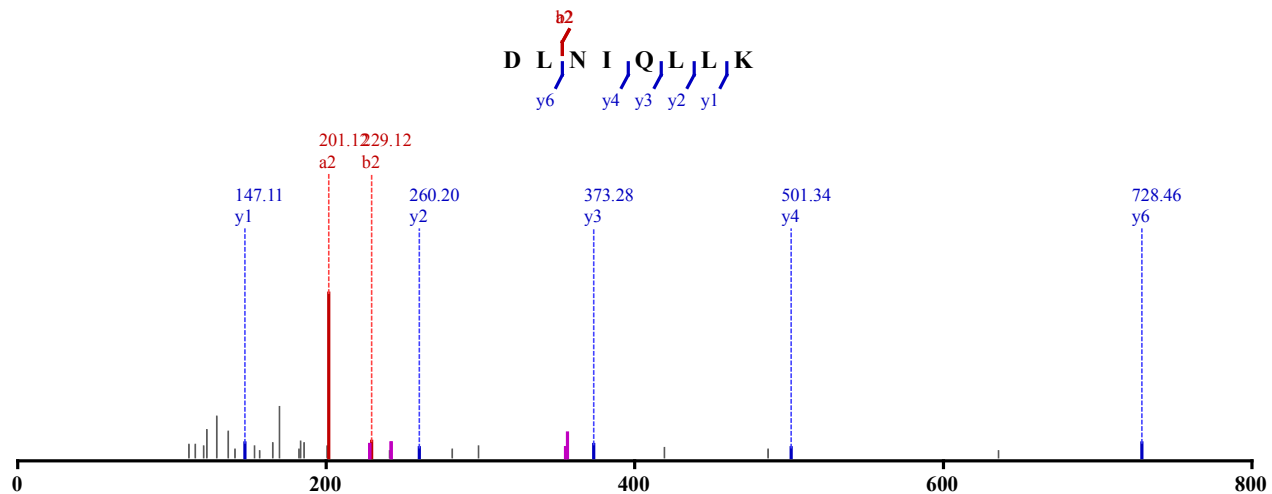

Not Modified  
 Identified in MSS479 with qvalue 0.00  
 Charge: 2, Exp. m/z: 478.792, Calc. m/z: 478.792

Data File: HeLa\_AspN\_pH5\_HCD\_2, Scans: 35109 - 35109

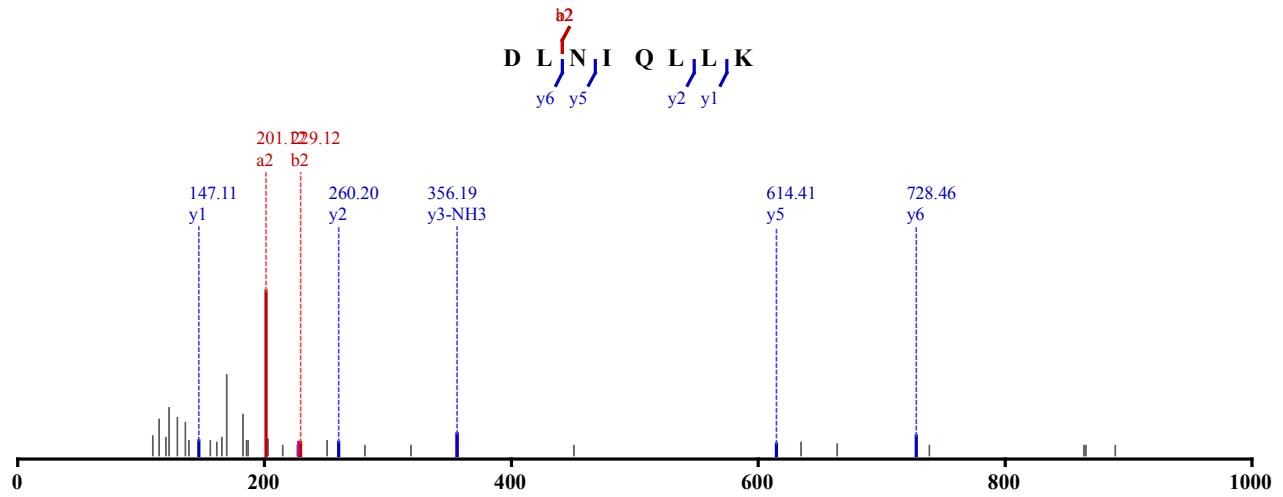

Not Modified

Identified in MSS479 with qvalue 0.00

Charge: 2, Exp. m/z: 478.792, Calc. m/z: 478.792

Data File: HeLa\_AspN\_pH6\_HCD\_3, Scans: 37453 - 37453

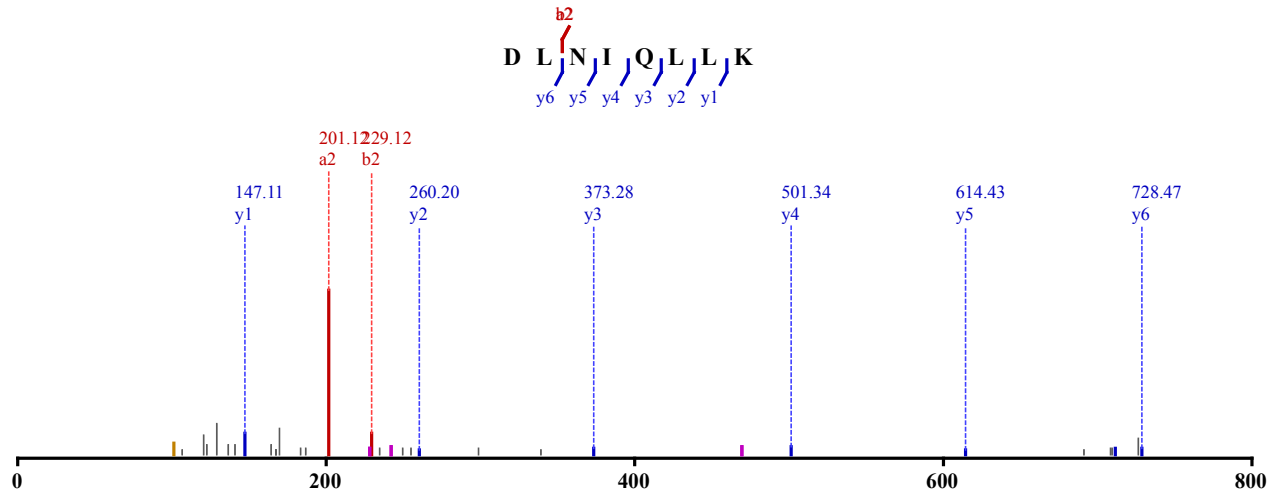

Not Modified

Identified in MSS479 with qvalue 0.00

Charge: 2, Exp. m/z: 478.792, Calc. m/z: 478.793

Data File: HeLa\_AspN\_pH11\_HCD\_1, Scans: 43048 - 43048

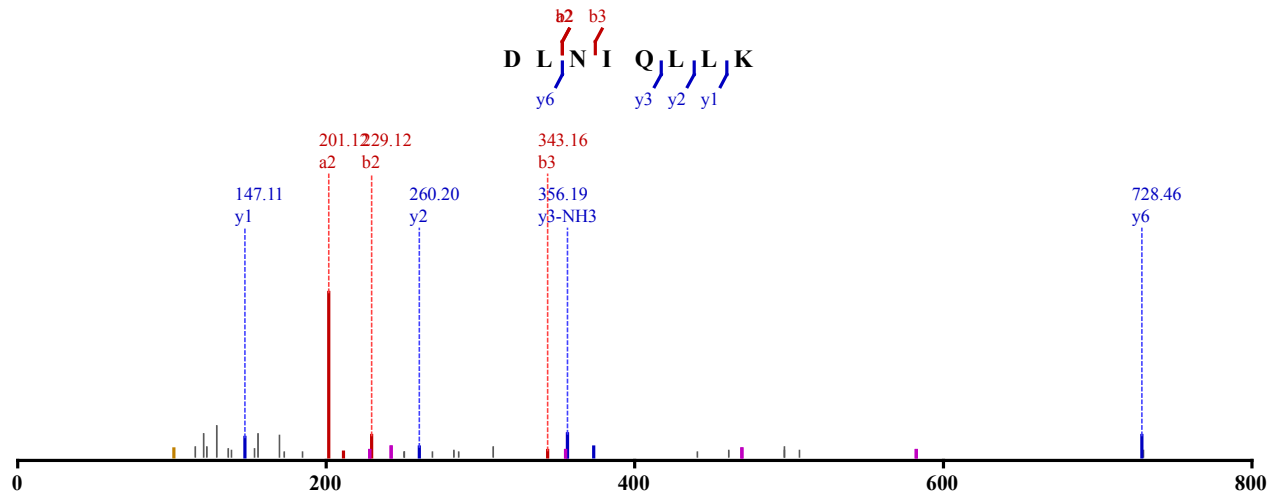

Not Modified

Identified in MSS479 with qvalue 0.00  
 Charge: 2, Exp. m/z: 478.792, Calc. m/z: 478.793  
 Data File: HeLa\_AspN\_pH11\_HCD\_1, Scans: 43128 - 43128

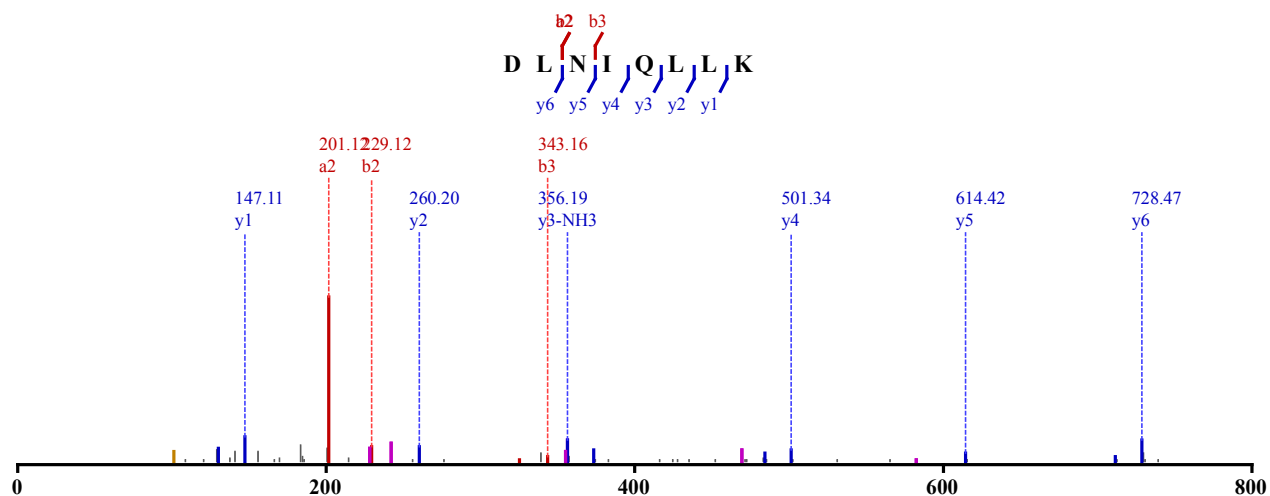

Not Modified  
 Identified in MSS479 with qvalue 0.00  
 Charge: 2, Exp. m/z: 478.792, Calc. m/z: 478.793  
 Data File: HeLa\_AspN\_pH11\_HCD\_2, Scans: 41762 - 41762

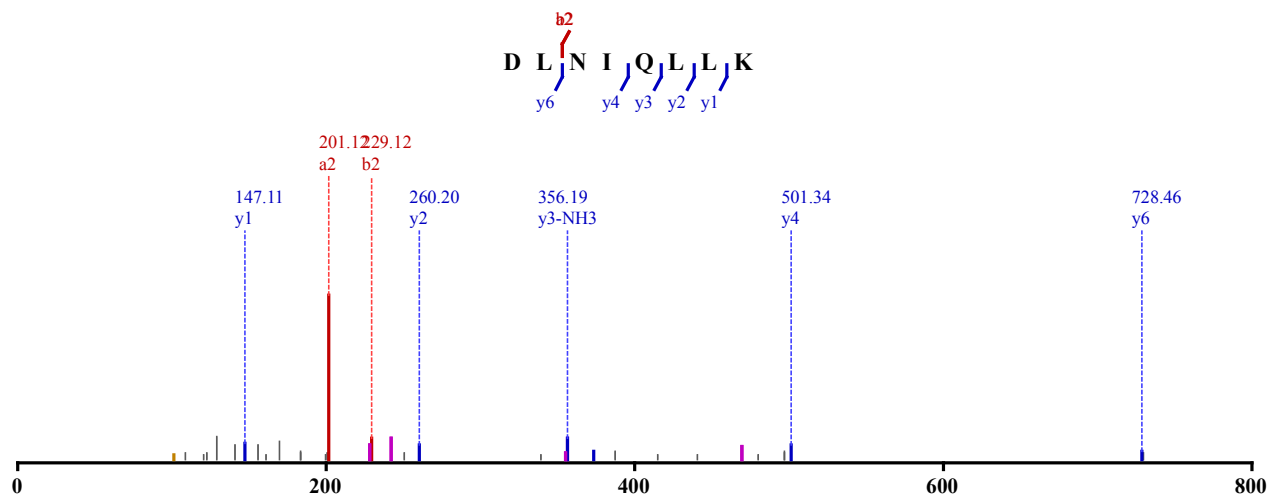

Not Modified  
 Identified in MSS479 with qvalue 0.00  
 Charge: 2, Exp. m/z: 478.792, Calc. m/z: 478.793  
 Data File: HeLa\_AspN\_pH11\_HCD\_2, Scans: 41834 - 41834

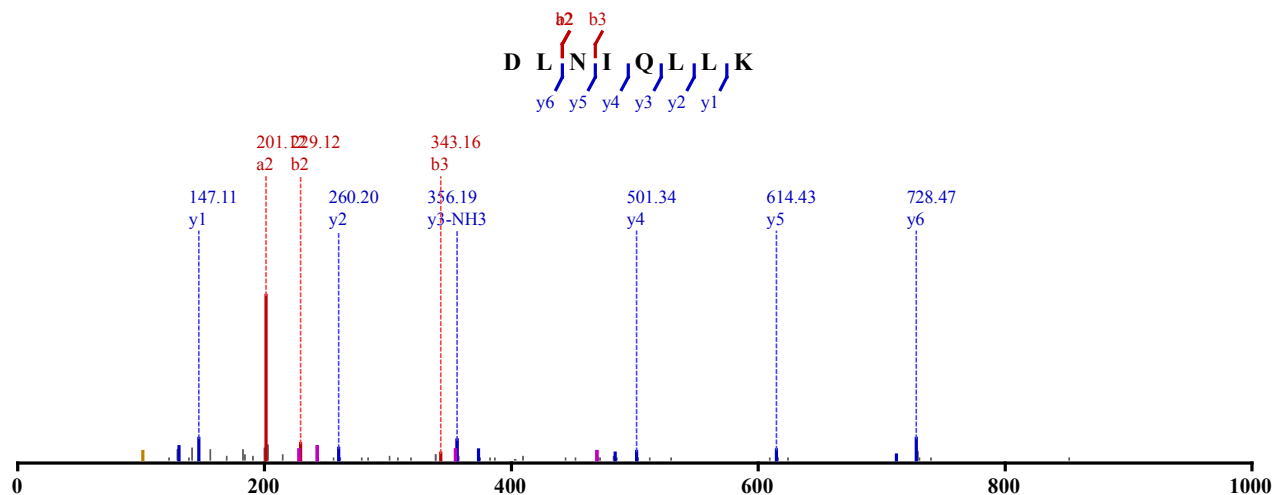

Not Modified

Identified in MSS479 with qvalue 0.00

Charge: 2, Exp. m/z: 478.792, Calc. m/z: 478.793

Data File: HeLa\_AspN\_pH11\_HCD\_3, Scans: 40962 - 40962

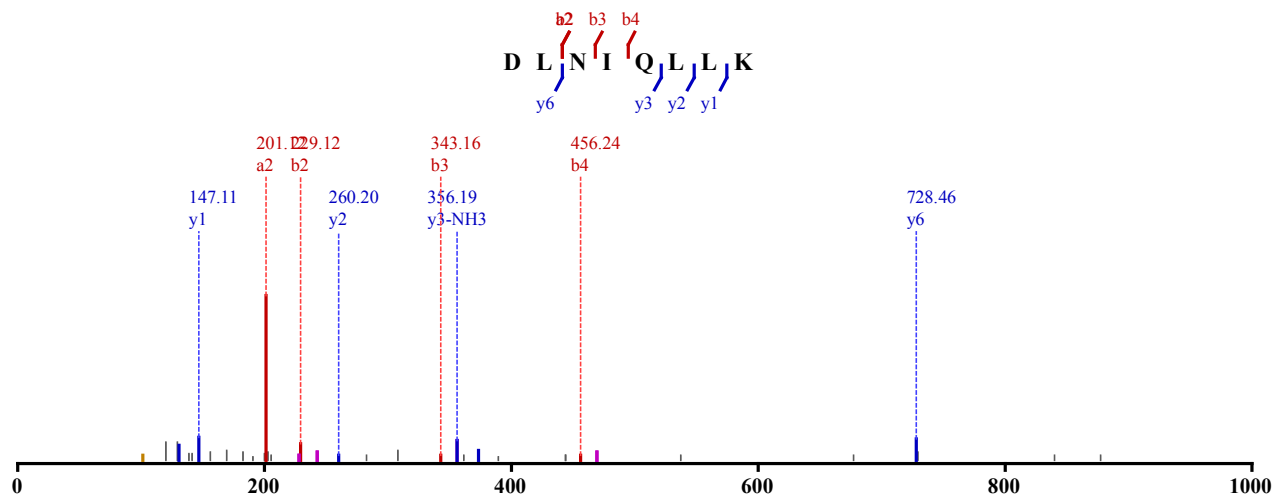

Not Modified

Identified in MSS479 with qvalue 0.00

Charge: 2, Exp. m/z: 478.792, Calc. m/z: 478.793

Data File: HeLa\_AspN\_pH11\_HCD\_3, Scans: 41039 - 41039

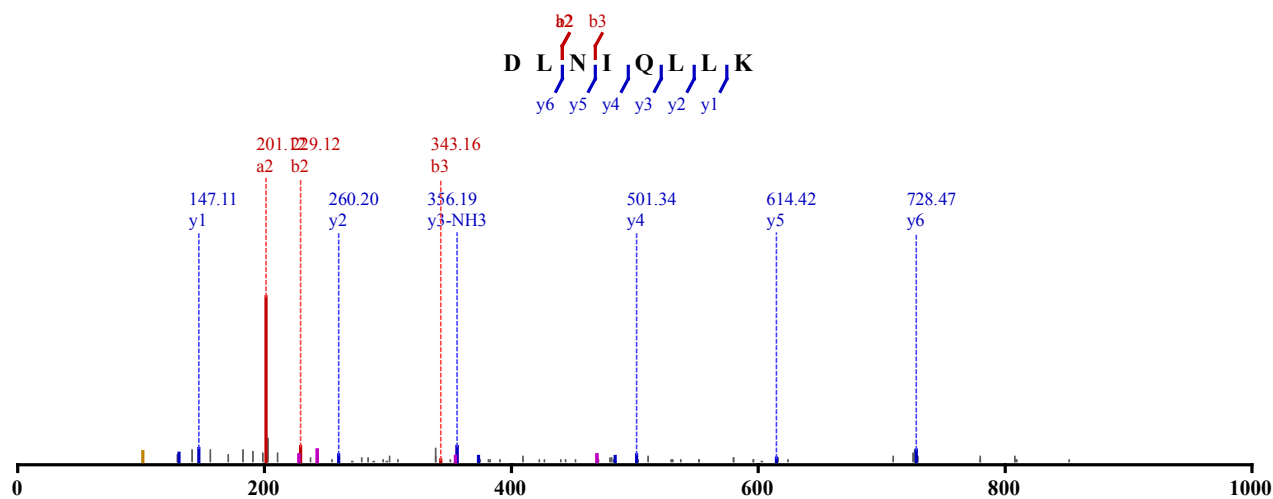

Not Modified

Identified in MSS479 with qvalue 0.00

Charge: 2, Exp. m/z: 478.792, Calc. m/z: 478.793

Data File: HeLa\_AspN\_pH6\_HCD\_1, Scans: 39022 - 39022

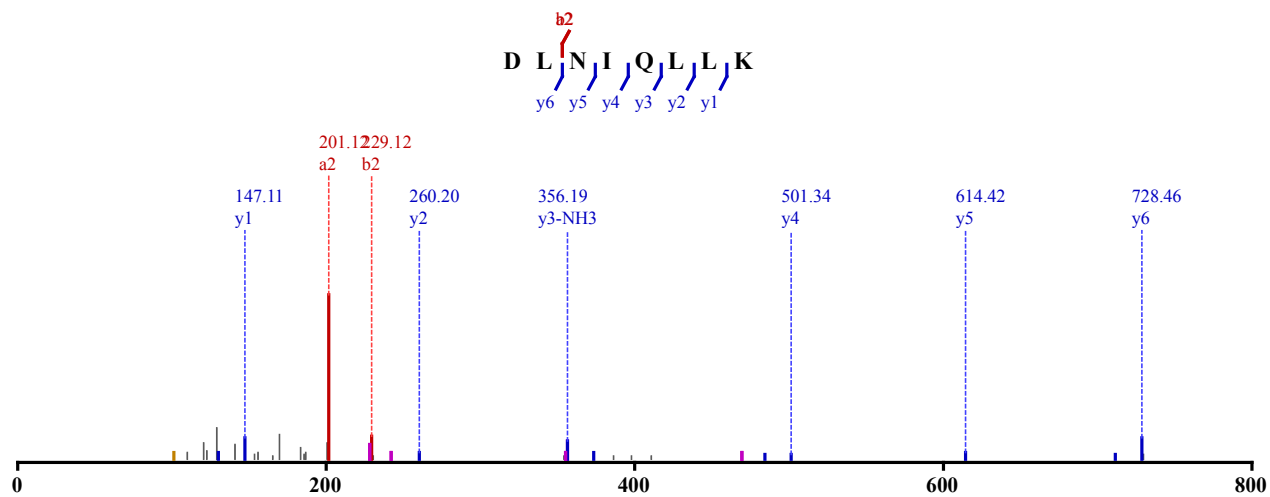

Not Modified

Identified in MSS479 with qvalue 0.00

Charge: 2, Exp. m/z: 478.792, Calc. m/z: 478.793

Data File: HeLa\_AspN\_pH6\_HCD\_2, Scans: 38248 - 38248

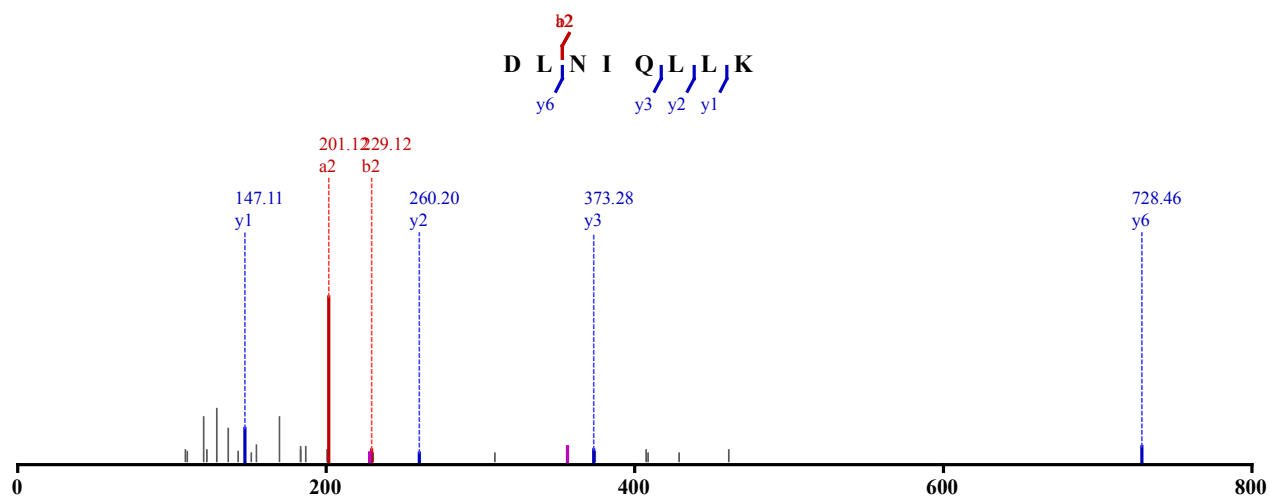

Not Modified

Identified in MSS479 with qvalue 0.00

Charge: 2, Exp. m/z: 478.792, Calc. m/z: 478.793

Data File: HeLa\_AspN\_pH6\_HCD\_2, Scans: 38330 - 38330

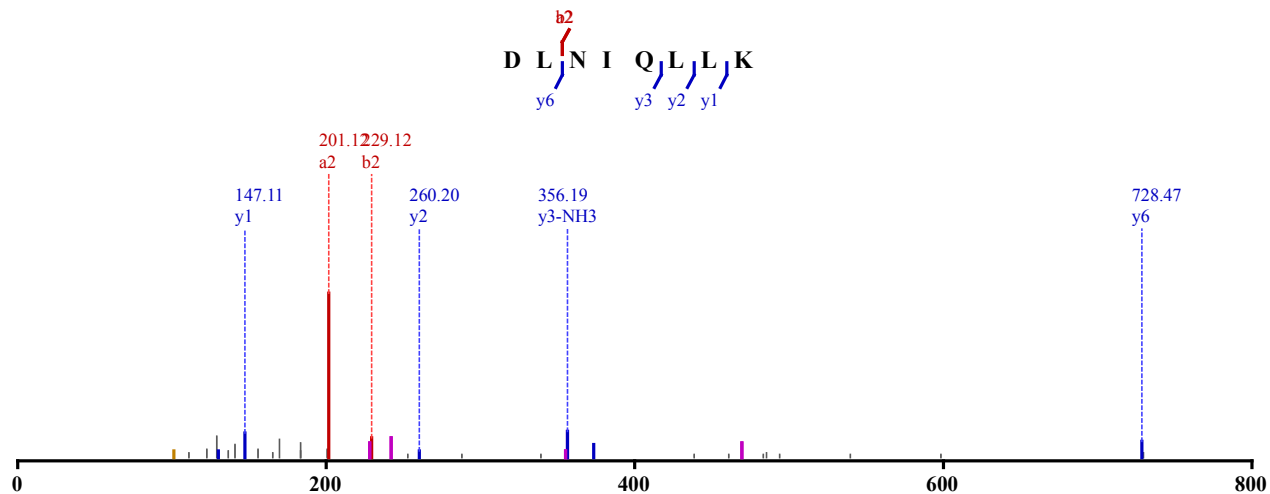

Not Modified

Identified in MSS479 with qvalue 0.00

Charge: 2, Exp. m/z: 478.792, Calc. m/z: 478.793



Data File: HeLa\_AspN\_pH8\_HCD\_1, Scans: 40068 - 40068

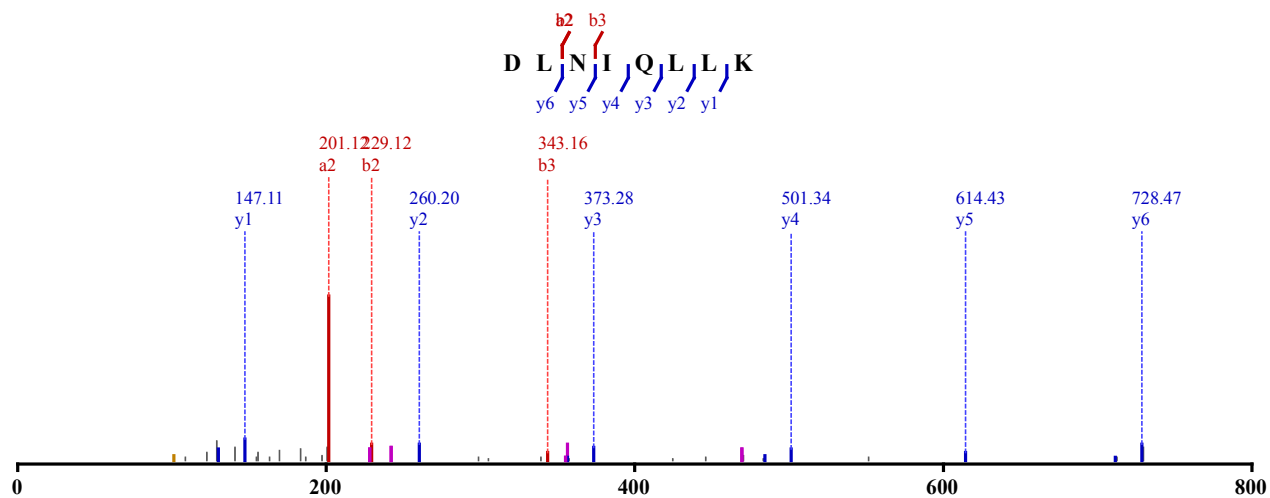

Not Modified

Identified in MSS479 with qvalue 0.00

Charge: 2, Exp. m/z: 478.793, Calc. m/z: 478.793

Data File: HeLa\_AspN\_pH8\_HCD\_2, Scans: 39058 - 39058

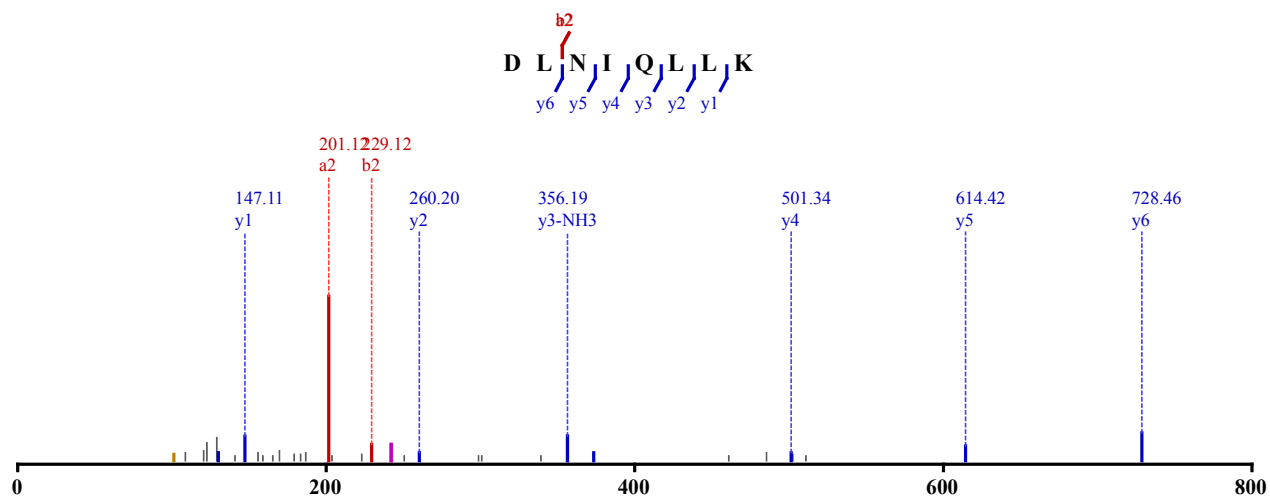

Not Modified

Identified in MSS479 with qvalue 0.00

Charge: 2, Exp. m/z: 478.792, Calc. m/z: 478.793

Data File: HeLa\_AspN\_pH8\_HCD\_2, Scans: 39134 - 39134

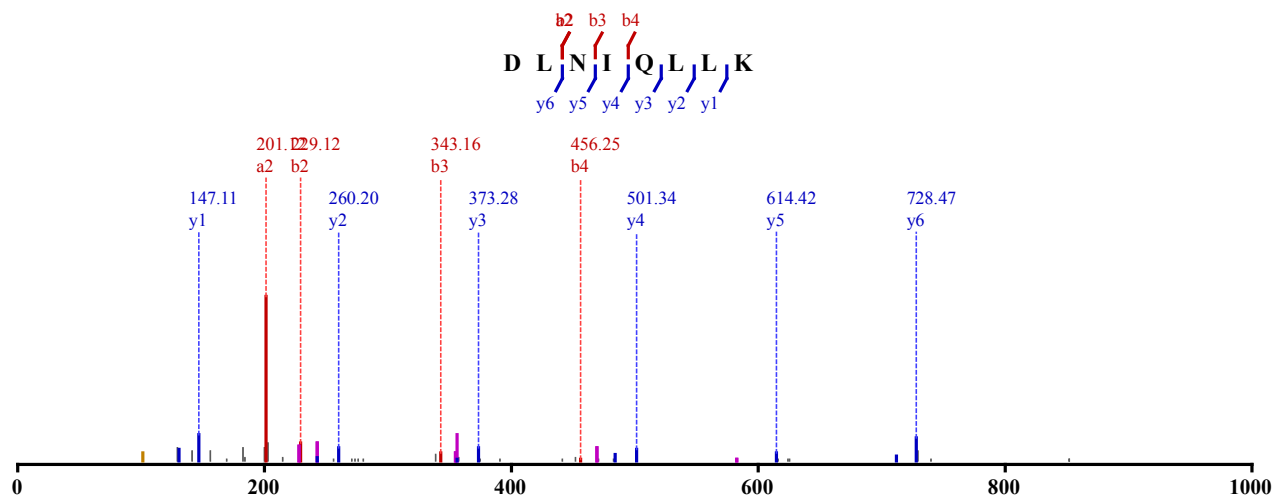

Not Modified

Identified in MSS479 with qvalue 0.00  
 Charge: 2, Exp. m/z: 478.792, Calc. m/z: 478.793  
 Data File: HeLa\_AspN\_pH8\_HCD\_3, Scans: 38177 - 38177

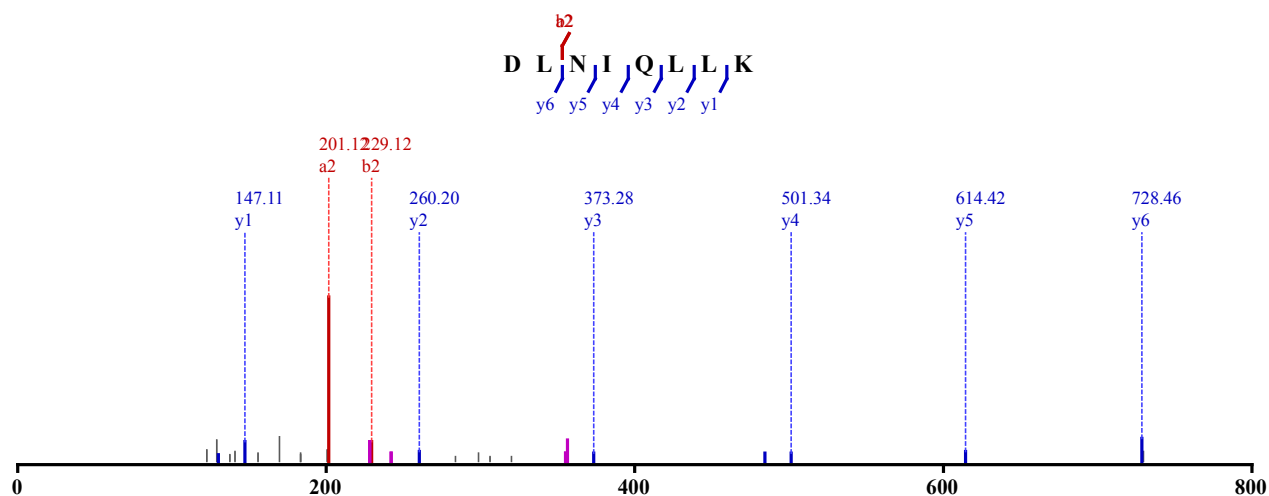

Not Modified  
 Identified in MSS479 with qvalue 0.00  
 Charge: 2, Exp. m/z: 478.793, Calc. m/z: 478.793  
 Data File: HeLa\_AspN\_pH8\_HCD\_3, Scans: 38250 - 38250

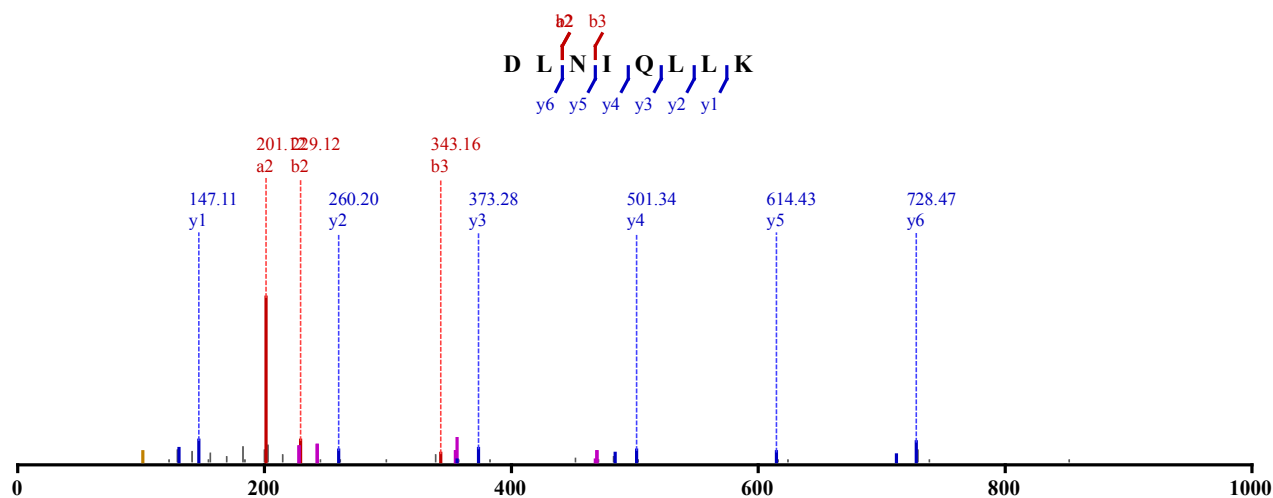

Not Modified  
 Identified in MSS483 with qvalue 0.00  
 Charge: 2, Exp. m/z: 478.792, Calc. m/z: 478.793  
 Data File: HeLa\_AspN\_pH11\_CID\_3xload\_2, Scans: 33639 - 33639

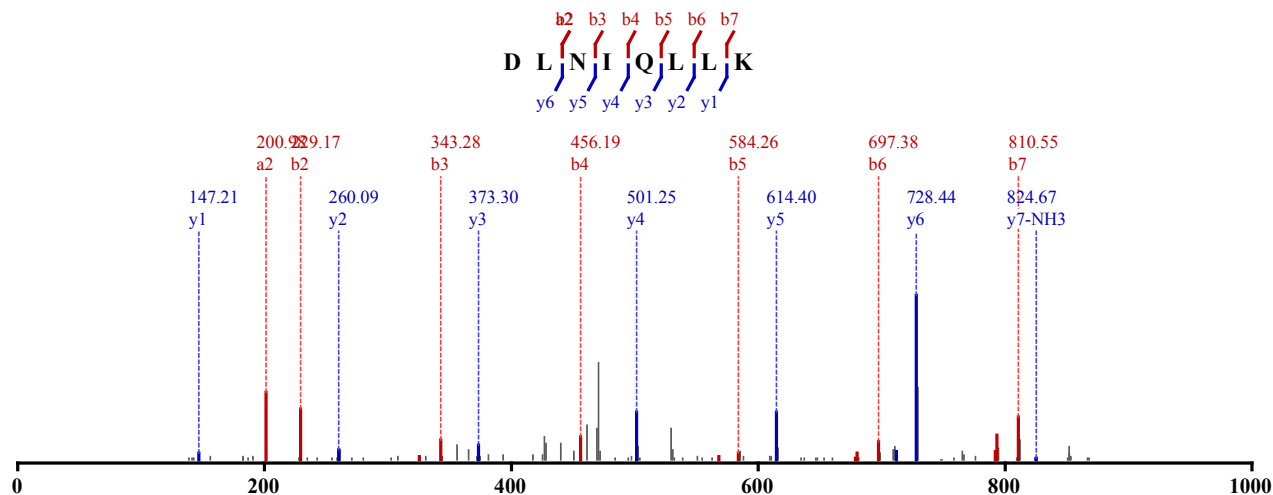

Not Modified

Identified in MSS483 with qvalue 0.00

Charge: 2, Exp. m/z: 478.792, Calc. m/z: 478.793

Data File: HeLa\_AspN\_pH11\_CID\_3xload\_2, Scans: 33706 - 33706

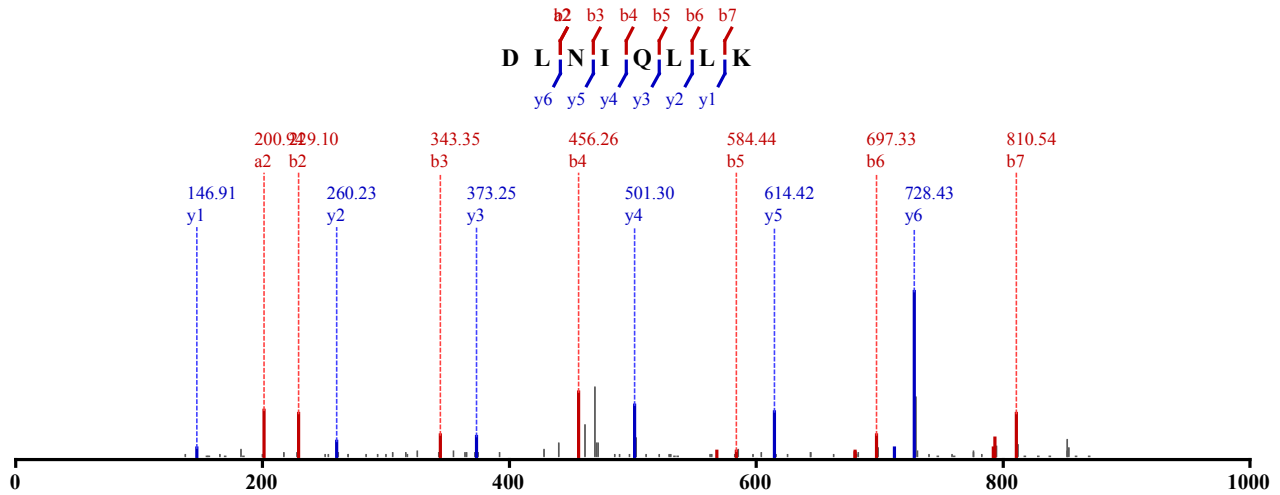

Not Modified

Identified in MSS483 with qvalue 0.00

Charge: 2, Exp. m/z: 478.792, Calc. m/z: 478.793

Data File: HeLa\_AspN\_pH11\_CID\_3xload, Scans: 33702 - 33702

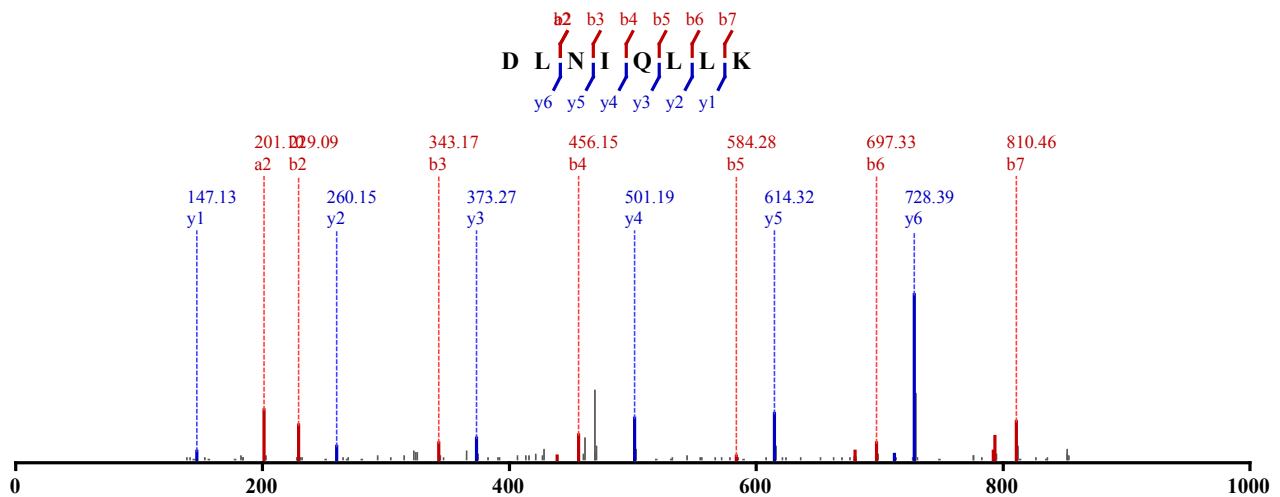

Not Modified

Identified in MSS483 with qvalue 0.00

Charge: 2, Exp. m/z: 478.792, Calc. m/z: 478.793

Data File: HeLa\_AspN\_pH4\_CID\_3xload, Scans: 22533 - 22533

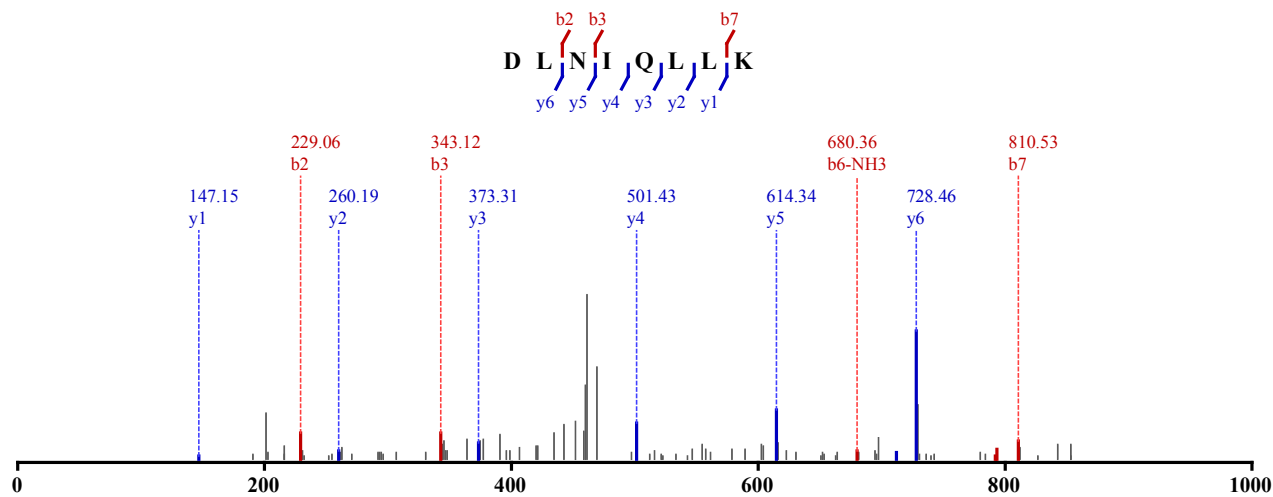

Not Modified  
 Identified in MSS483 with qvalue 0.00  
 Charge: 2, Exp. m/z: 478.793, Calc. m/z: 478.793  
 Data File: HeLa\_AspN\_pH6\_CID\_3xload\_2, Scans: 24969 - 24969

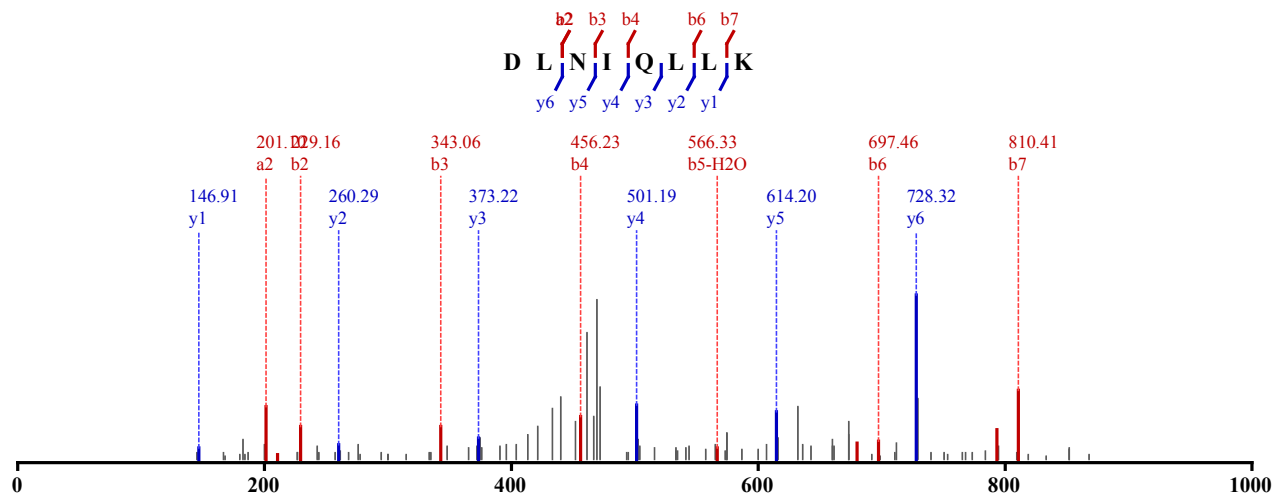

Not Modified  
 Identified in MSS483 with qvalue 0.00  
 Charge: 2, Exp. m/z: 478.792, Calc. m/z: 478.793  
 Data File: HeLa\_AspN\_pH8\_CID\_3xload\_2, Scans: 30708 - 30708

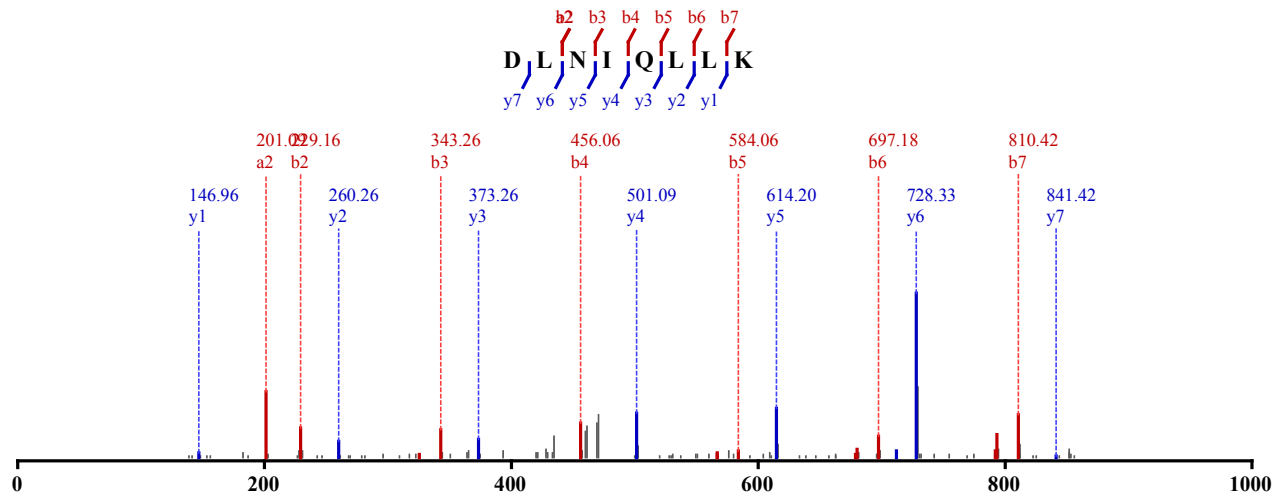

Not Modified  
 Identified in MSS483 with qvalue 0.00  
 Charge: 2, Exp. m/z: 478.792, Calc. m/z: 478.793

Data File: HeLa\_AspN\_pH8\_CID\_3xload\_2, Scans: 30778 - 30778

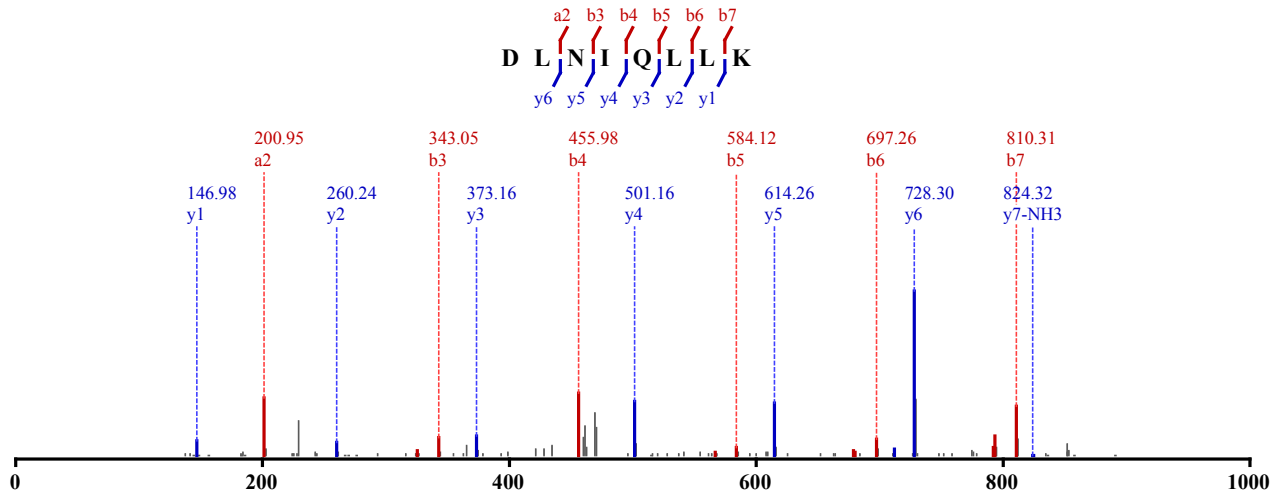

Not Modified

Identified in MSS483 with qvalue 0.00

Charge: 2, Exp. m/z: 478.793, Calc. m/z: 478.793

Data File: HeLa\_AspN\_pH8\_CID\_3xload, Scans: 30798 - 30798

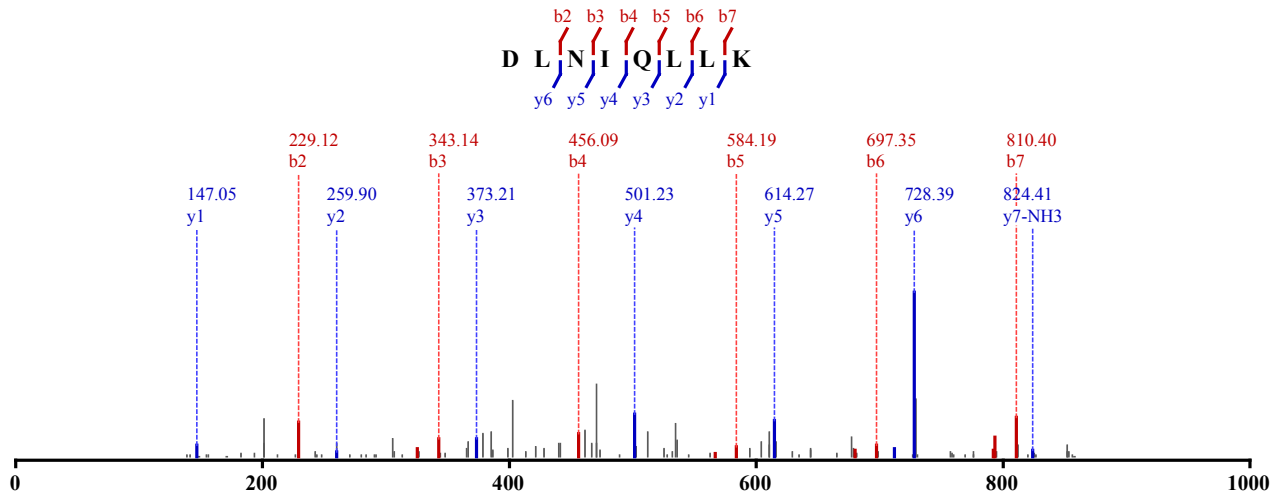

Not Modified

Identified in MSS483 with qvalue 0.00

Charge: 2, Exp. m/z: 478.792, Calc. m/z: 478.793

Data File: HeLa\_AspN\_pH8\_CID\_3xload, Scans: 30868 - 30868

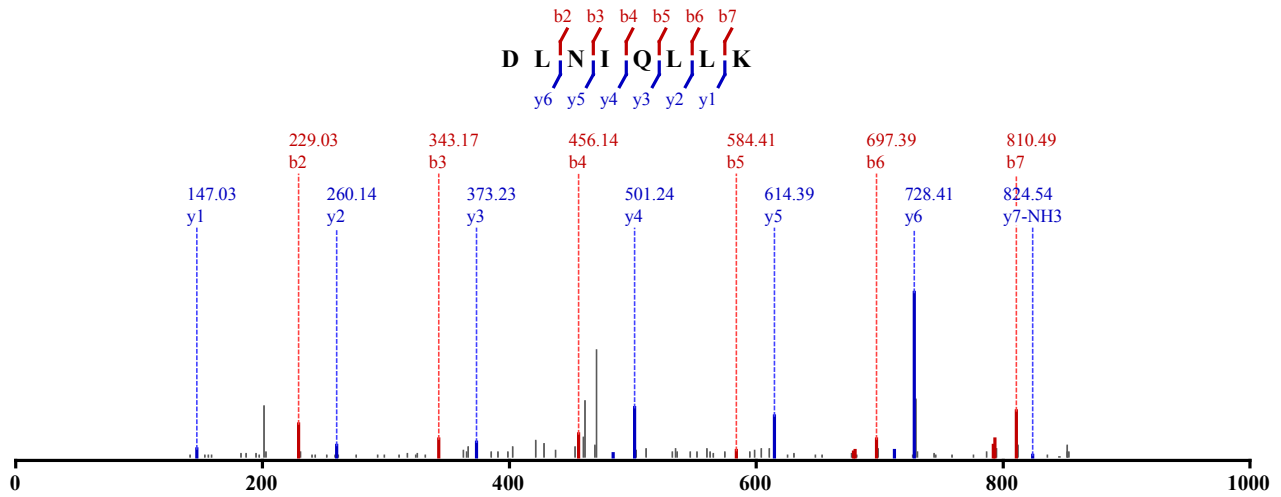

Not Modified

Identified in MSS480 with qvalue 0.00

Charge: 2, Exp. m/z: 670.302, Calc. m/z: 669.802

Data File: HeLa\_try\_pH11\_CID\_3xload\_2, Scans: 9316 - 9316

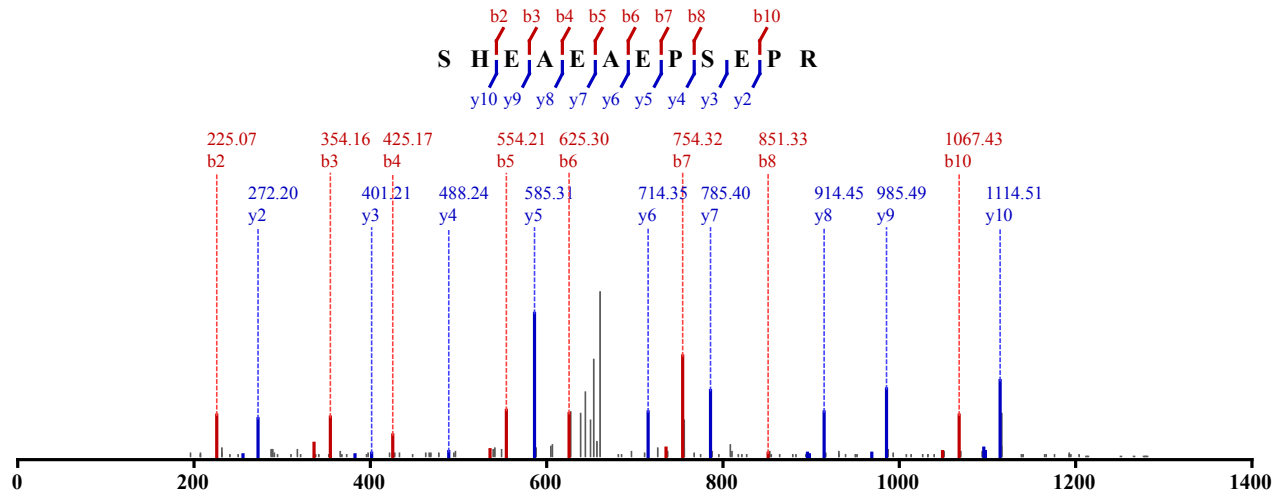

Not Modified

Identified in MSS480 with qvalue 0.00

Charge: 2, Exp. m/z: 670.304, Calc. m/z: 669.802

Data File: HeLa\_try\_pH11\_CID\_3xload\_2, Scans: 9421 - 9421

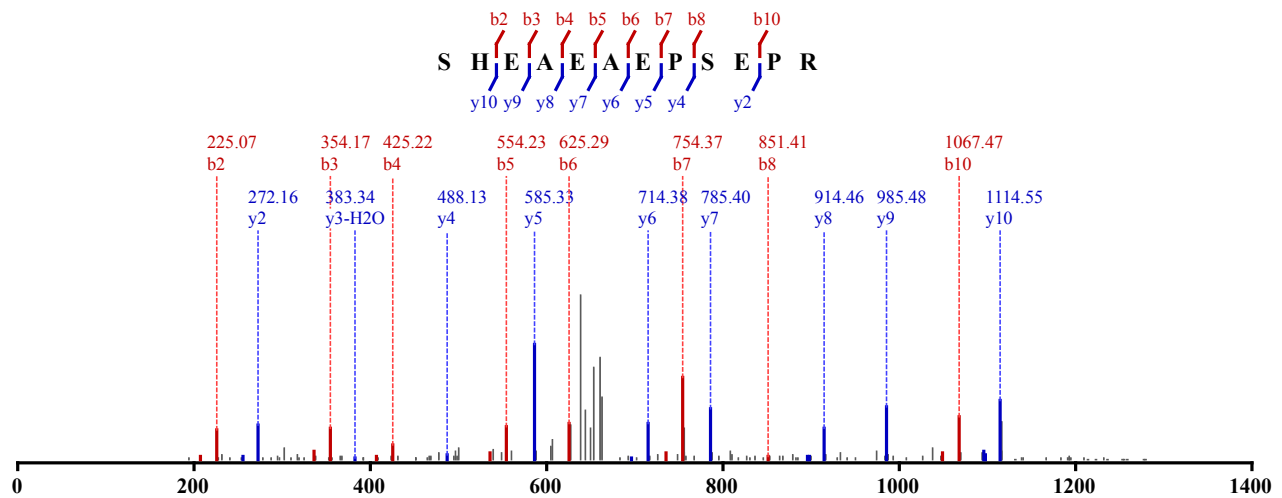

Not Modified

Identified in MSS480 with qvalue 0.00

Charge: 2, Exp. m/z: 669.801, Calc. m/z: 669.802

Data File: HeLa\_try\_pH11\_CID\_3xload\_3, Scans: 9133 - 9133

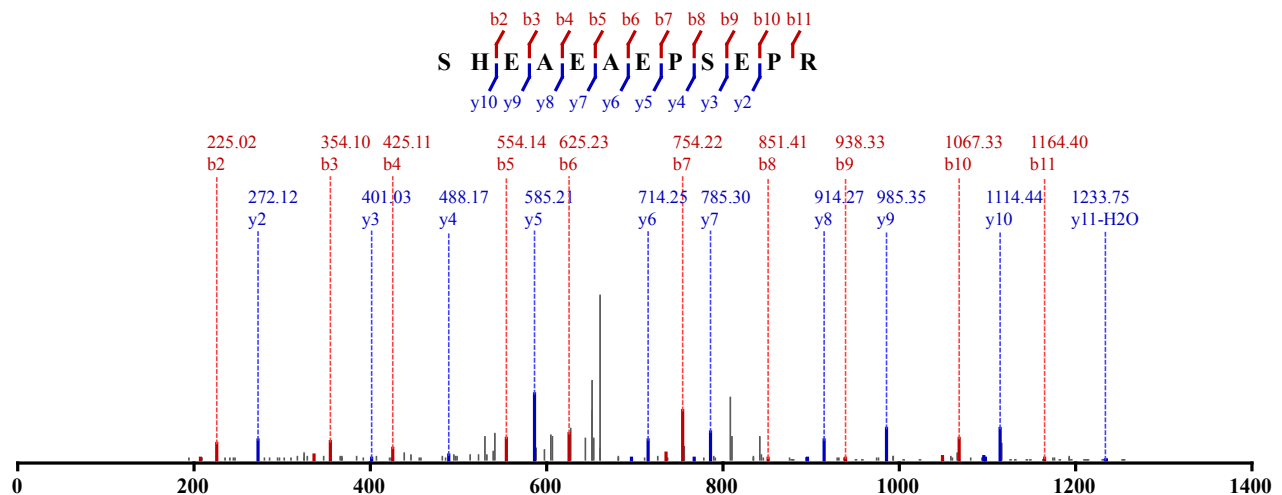

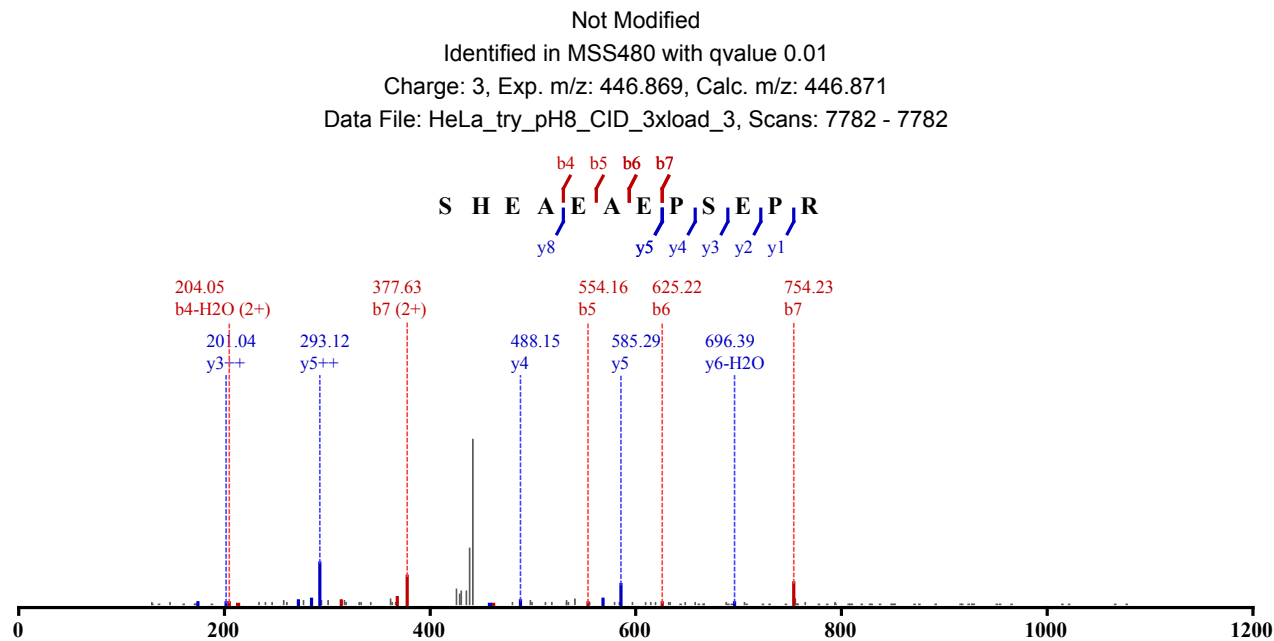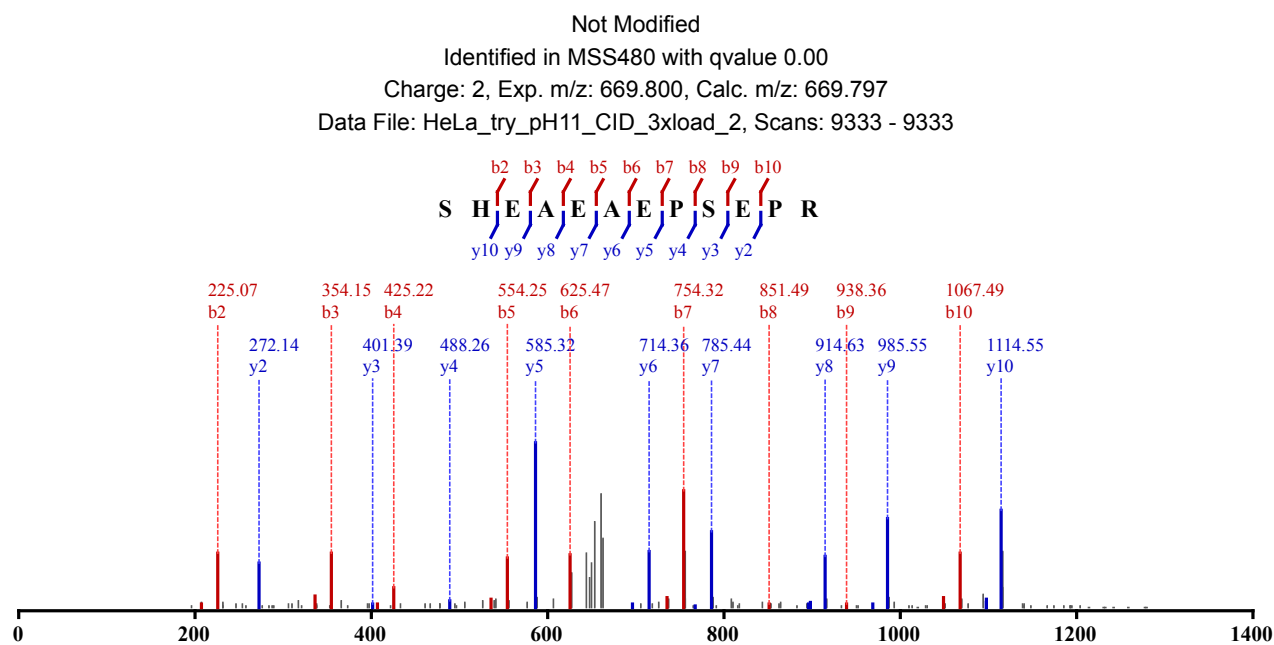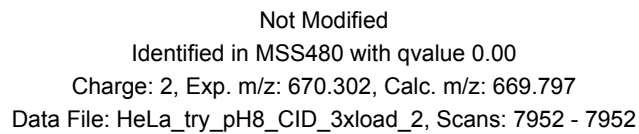

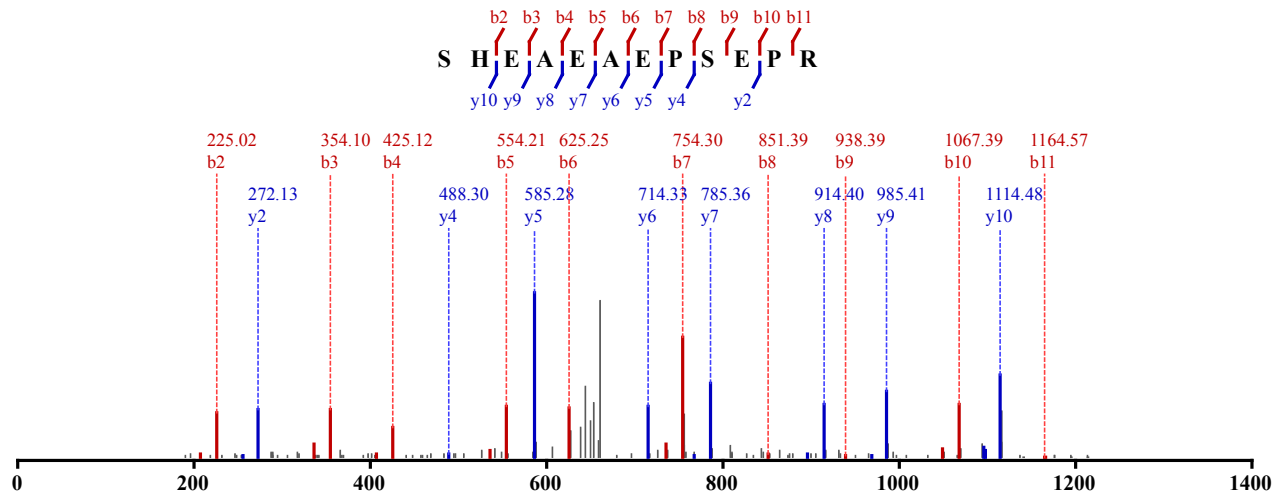

Not Modified

Identified in MSS480 with qvalue 0.00

Charge: 2, Exp. m/z: 669.799, Calc. m/z: 669.797

Data File: HeLa\_try\_pH8\_CID\_3xload\_3, Scans: 7788 - 7788

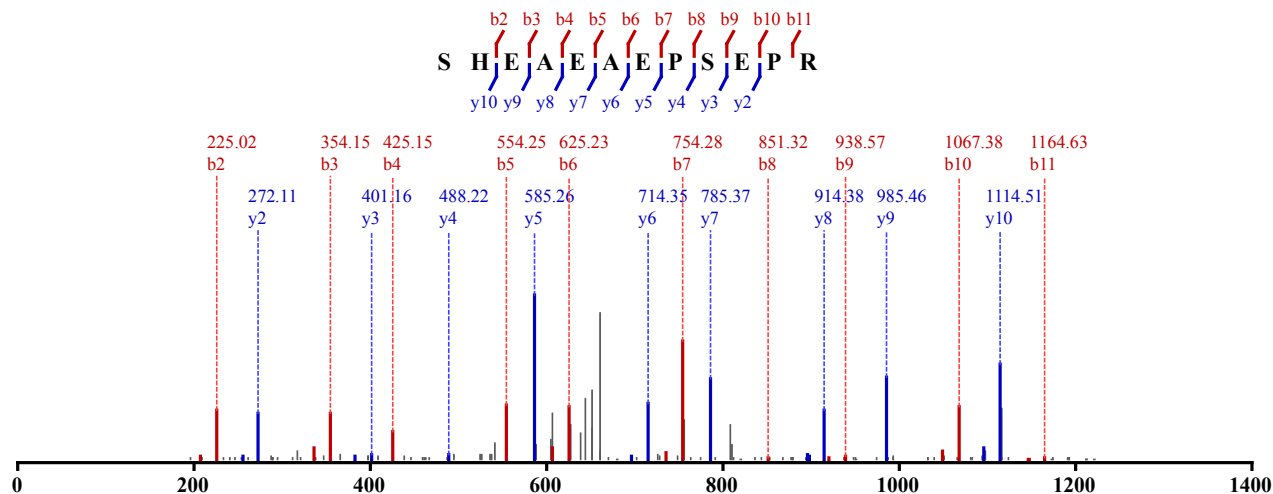

Not Modified

Identified in MSS484 with qvalue 0.00

Charge: 3, Exp. m/z: 446.869, Calc. m/z: 446.867

Data File: HeLa\_Try\_pH8\_HCD\_3, Scans: 11450 - 11450

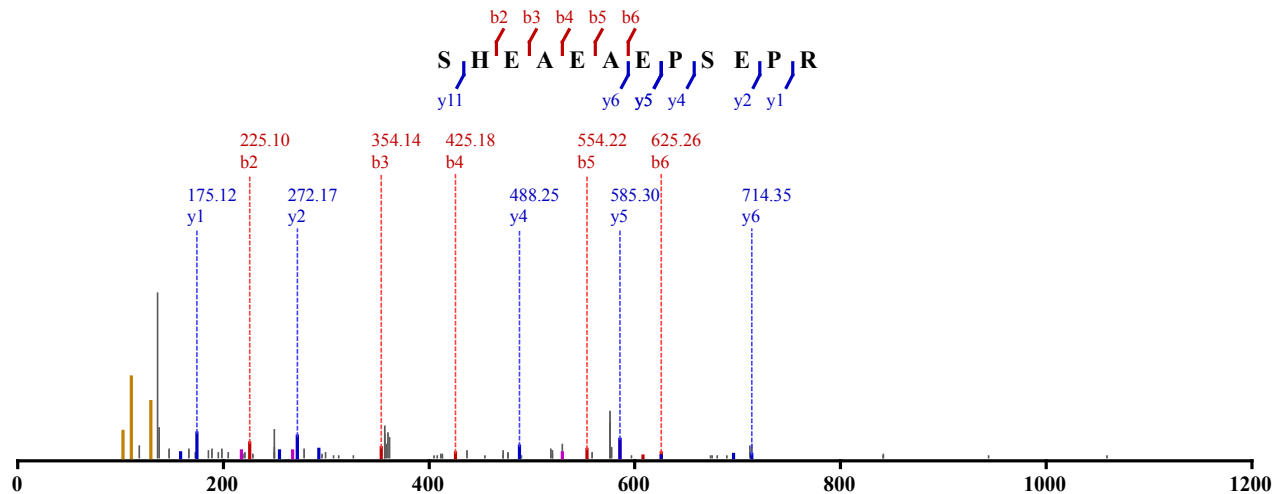

Not Modified

Identified in MSS484 with qvalue 0.00

Charge: 3, Exp. m/z: 446.869, Calc. m/z: 446.871



Data File: HeLa\_Try\_pH11\_HCD\_2, Scans: 13012 - 13012

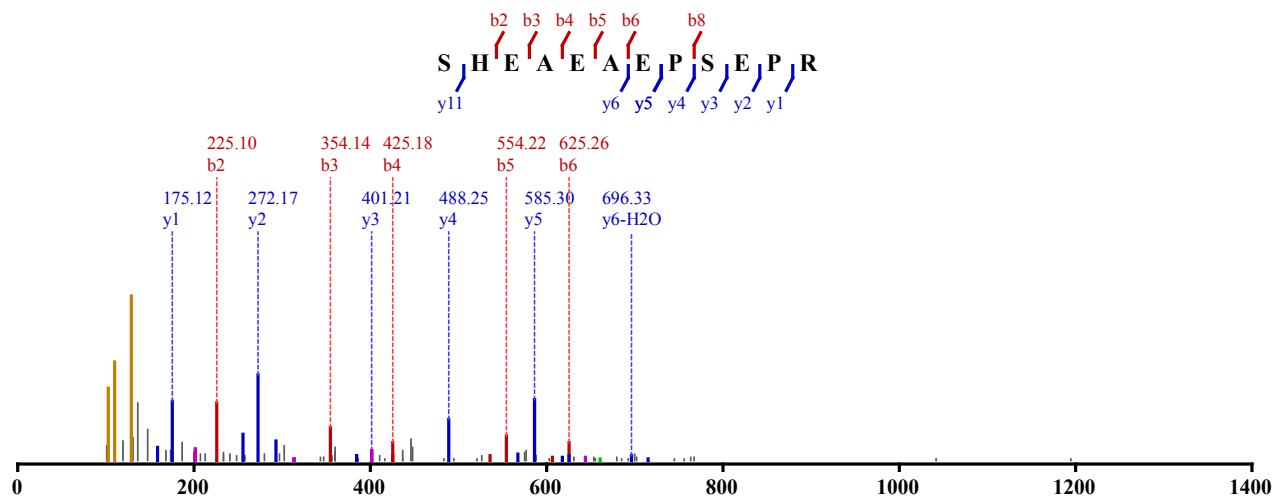

Not Modified

Identified in MSS484 with qvalue 0.00

Charge: 2, Exp. m/z: 669.800, Calc. m/z: 669.802

Data File: HeLa\_Try\_pH11\_HCD\_2, Scans: 13014 - 13014

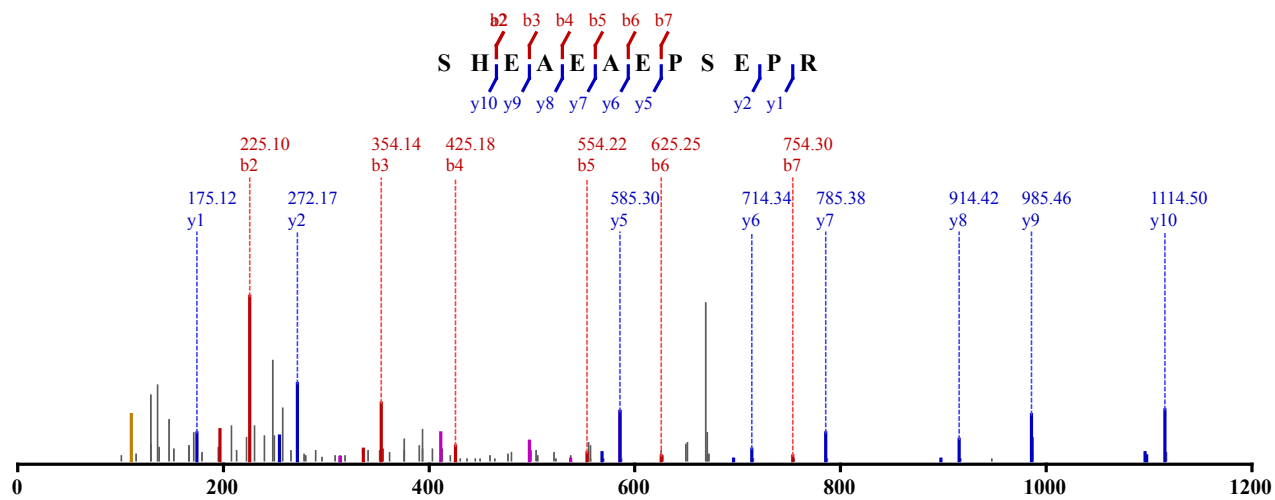

Not Modified

Identified in MSS484 with qvalue 0.00

Charge: 2, Exp. m/z: 669.302, Calc. m/z: 669.797

Data File: HeLa\_Try\_pH11\_HCD\_1, Scans: 10927 - 10927

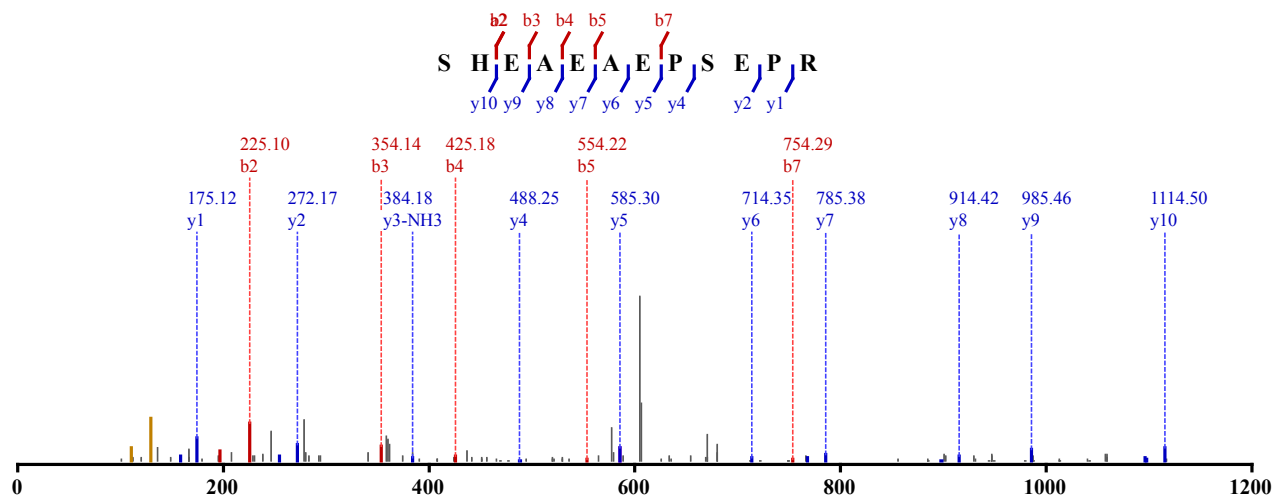

Not Modified

Identified in MSS488 with qvalue 0.00  
 Charge: 2, Exp. m/z: 669.800, Calc. m/z: 669.802  
 Data File: HeLa\_chy-try\_pH11\_CID\_3xload, Scans: 10840 - 10840

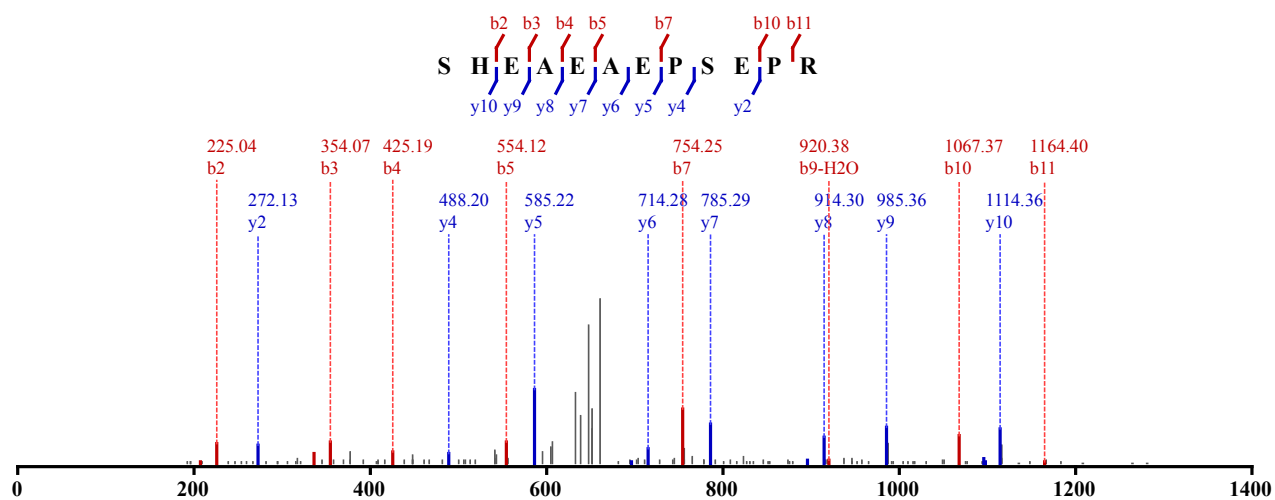

Not Modified  
 Identified in MSS488 with qvalue 0.00  
 Charge: 2, Exp. m/z: 669.800, Calc. m/z: 669.802  
 Data File: HeLa\_chy-try\_pH8\_CID\_3xload, Scans: 8673 - 8673

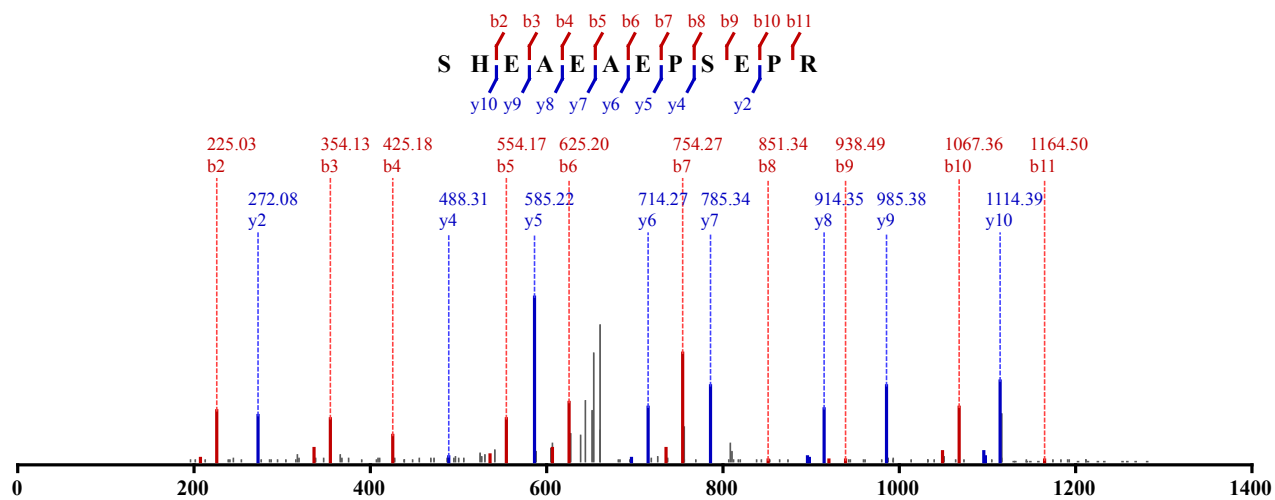

Not Modified  
 Identified in MSS488 with qvalue 0.00  
 Charge: 2, Exp. m/z: 669.800, Calc. m/z: 669.797  
 Data File: HeLa\_chy-try\_pH11\_CID\_3xload\_3, Scans: 11459 - 11459

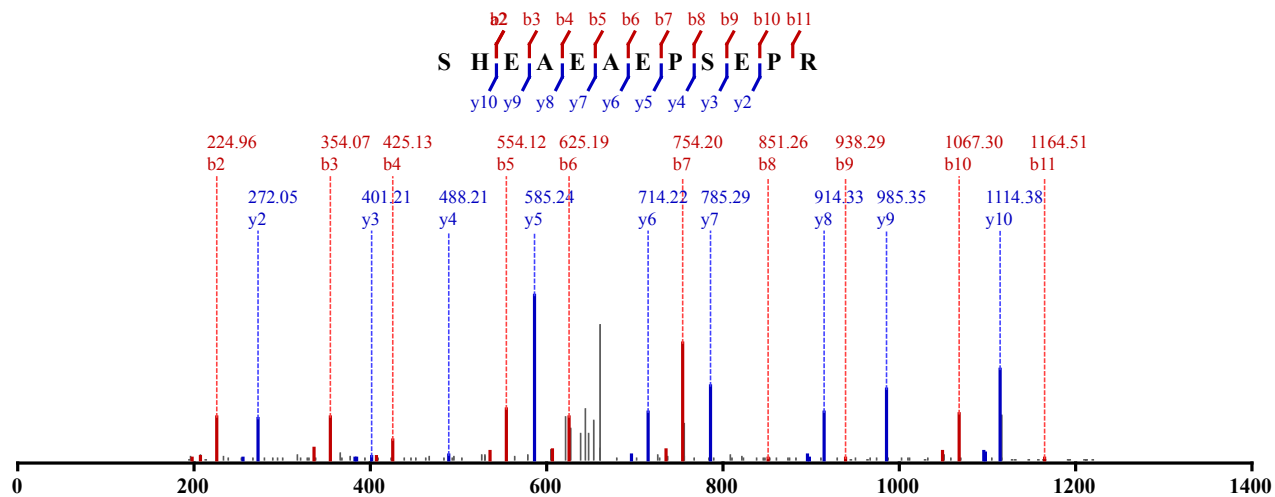



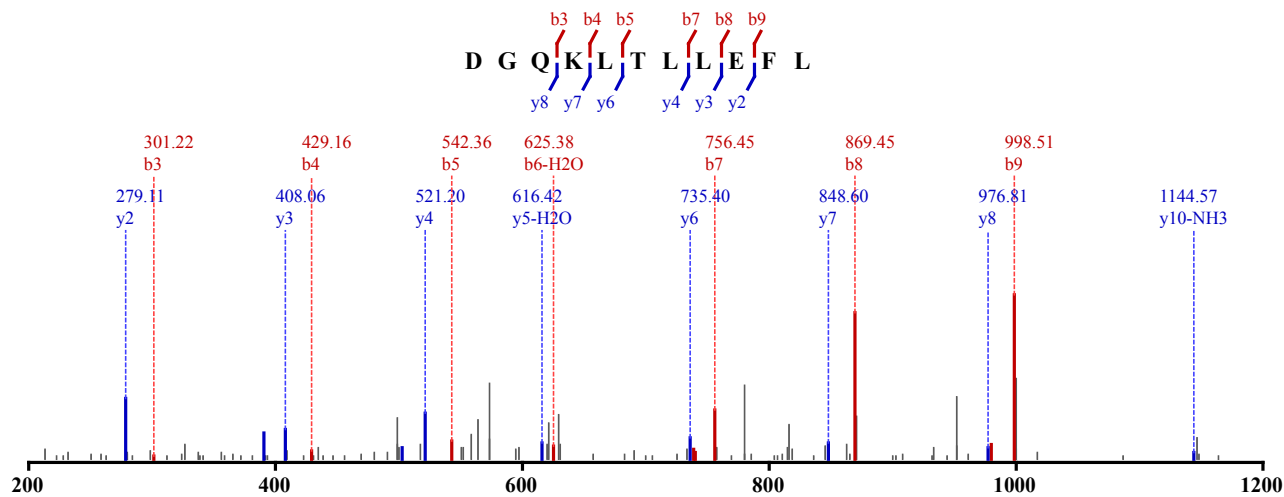

Not Modified

Identified in MSS483 with qvalue 0.00

Charge: 2, Exp. m/z: 638.861, Calc. m/z: 638.862

Data File: HeLa\_AspN\_pH2\_CID\_3xload, Scans: 39192 - 39192

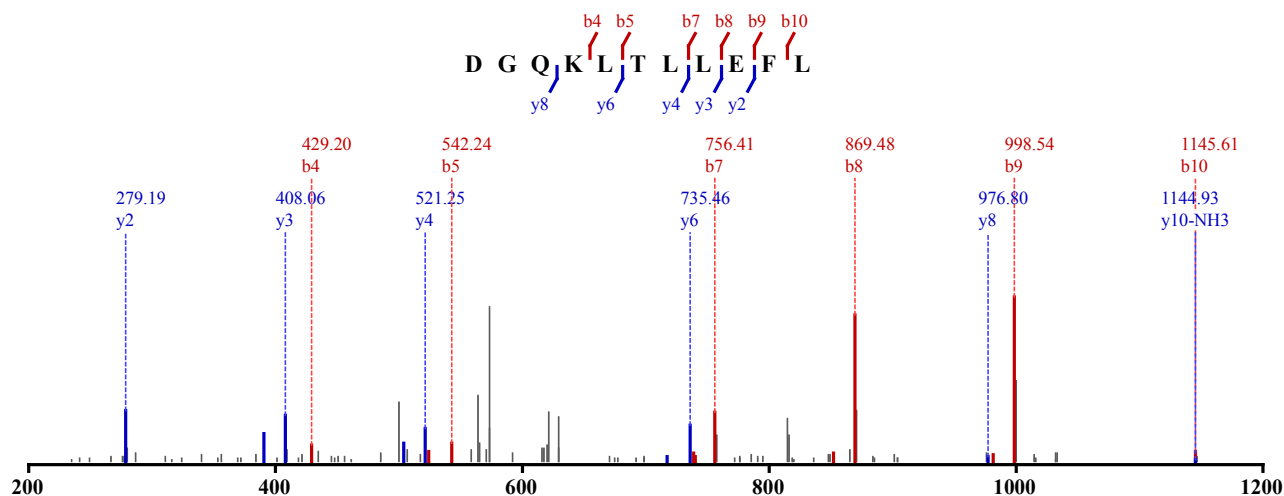

Not Modified

Identified in MSS483 with qvalue 0.01

Charge: 2, Exp. m/z: 638.842, Calc. m/z: 638.862

Data File: HeLa\_AspN\_pH2\_CID\_3xload\_2, Scans: 39343 - 39343

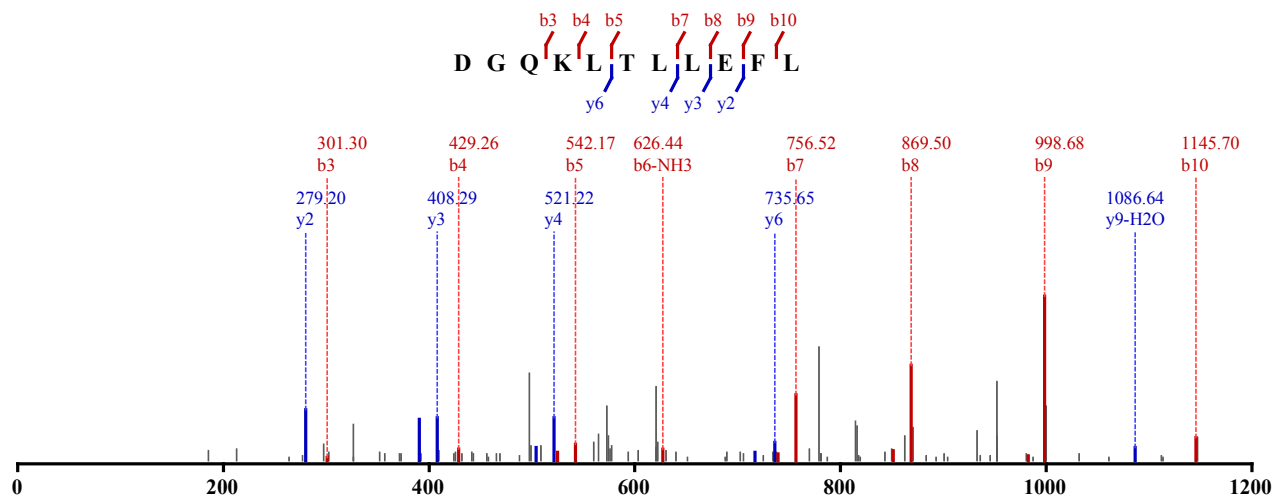

Not Modified

Identified in MSS484 with qvalue 0.00

Charge: 2, Exp. m/z: 585.828, Calc. m/z: 585.827

Data File: HeLa\_Try\_pH11\_HCD\_3, Scans: 47031 - 47031

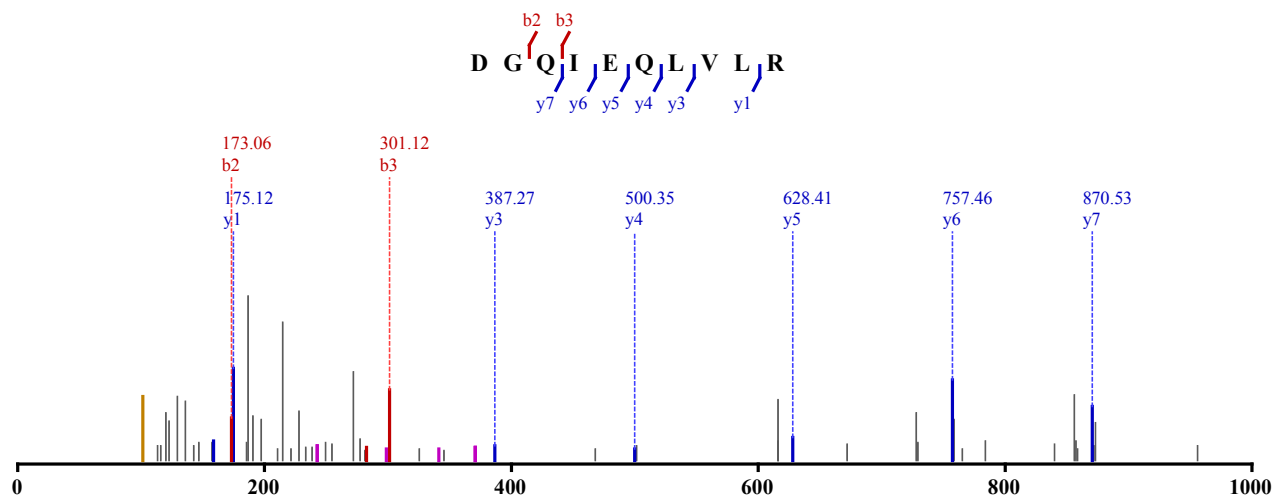

Not Modified

Identified in MSS484 with qvalue 0.00

Charge: 2, Exp. m/z: 585.827, Calc. m/z: 585.827

Data File: HeLa\_Try\_pH8\_HCD\_3, Scans: 44337 - 44337

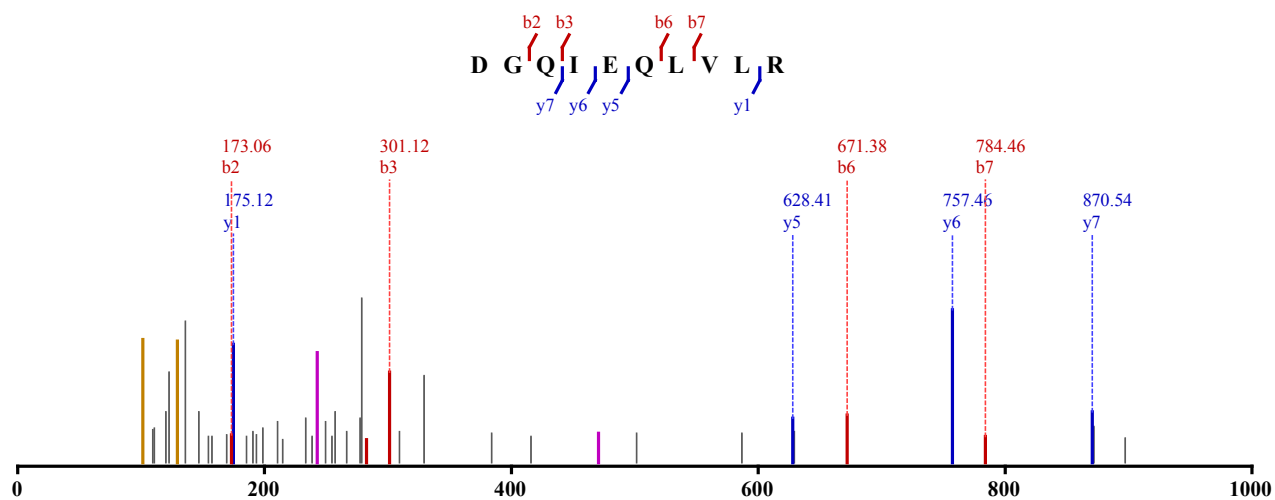

Not Modified

Identified in MSS484 with qvalue 0.00

Charge: 2, Exp. m/z: 585.827, Calc. m/z: 585.827

Data File: HeLa\_Try\_pH11\_HCD\_1, Scans: 51703 - 51703

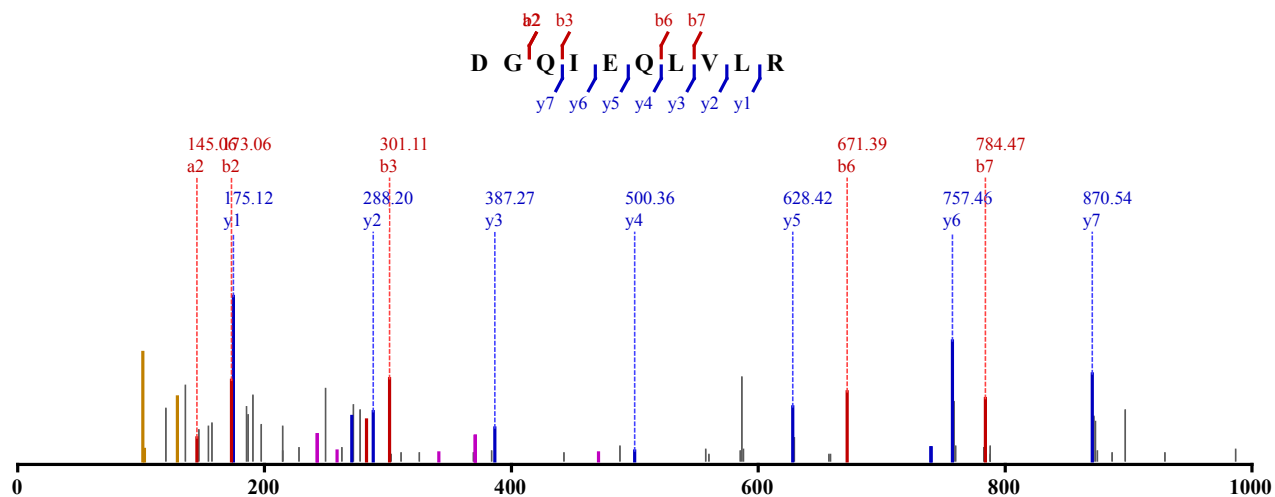

1 x Acetylation (Protein N-term)

Identified in MSS480 with qvalue 0.00

Charge: 2, Exp. m/z: 806.904, Calc. m/z: 806.907

Data File: HeLa\_try\_pH11\_CID\_3xload\_3, Scans: 60299 - 60299

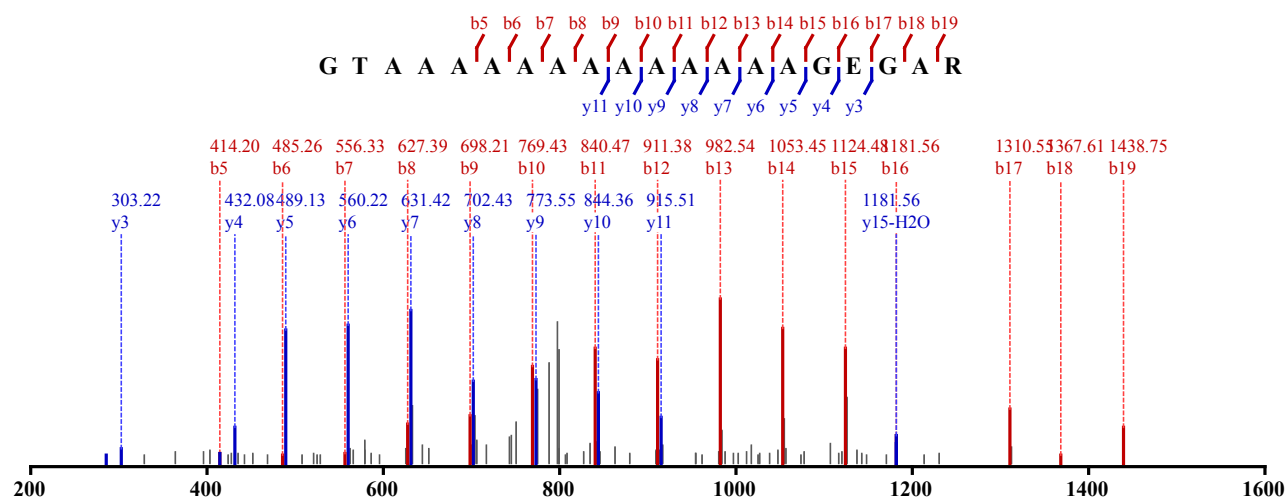

1 x Acetylation (Protein N-term)

Identified in MSS480 with qvalue 0.00

Charge: 2, Exp. m/z: 806.906, Calc. m/z: 806.907

Data File: HeLa\_try\_pH11\_CID\_3xload\_3, Scans: 60227 - 60227

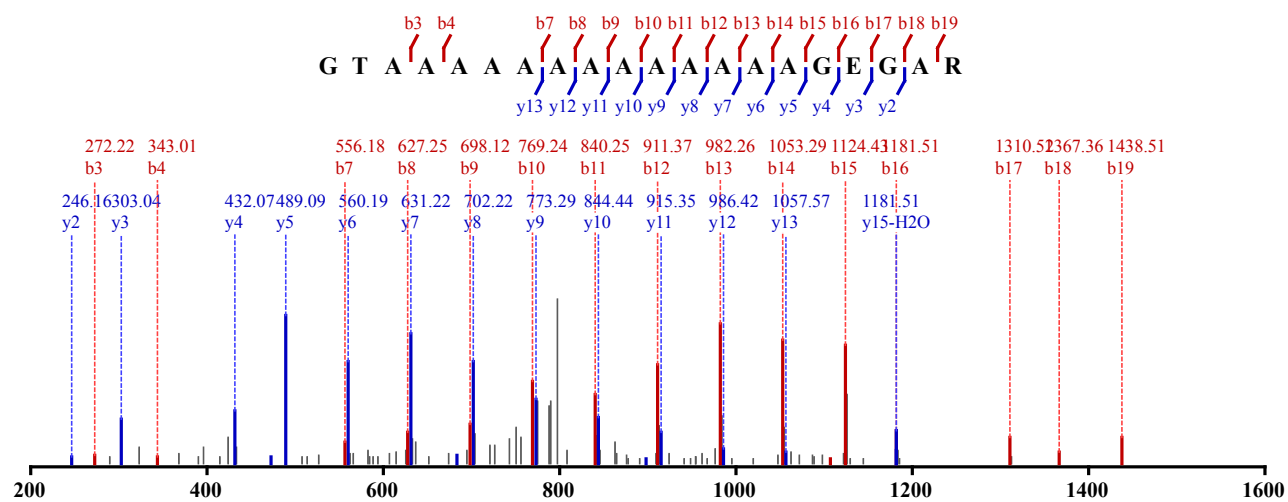

1 x Acetylation (Protein N-term)

Identified in MSS480 with qvalue 0.01

Charge: 3, Exp. m/z: 538.282, Calc. m/z: 538.274

Data File: HeLa\_try\_pH2\_CID\_3xload, Scans: 28286 - 28286

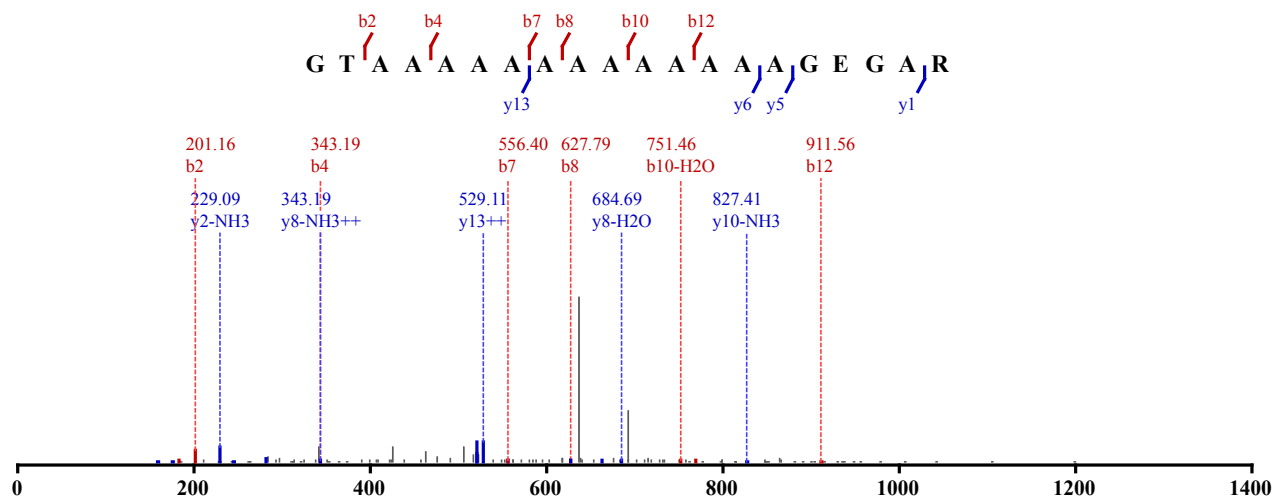

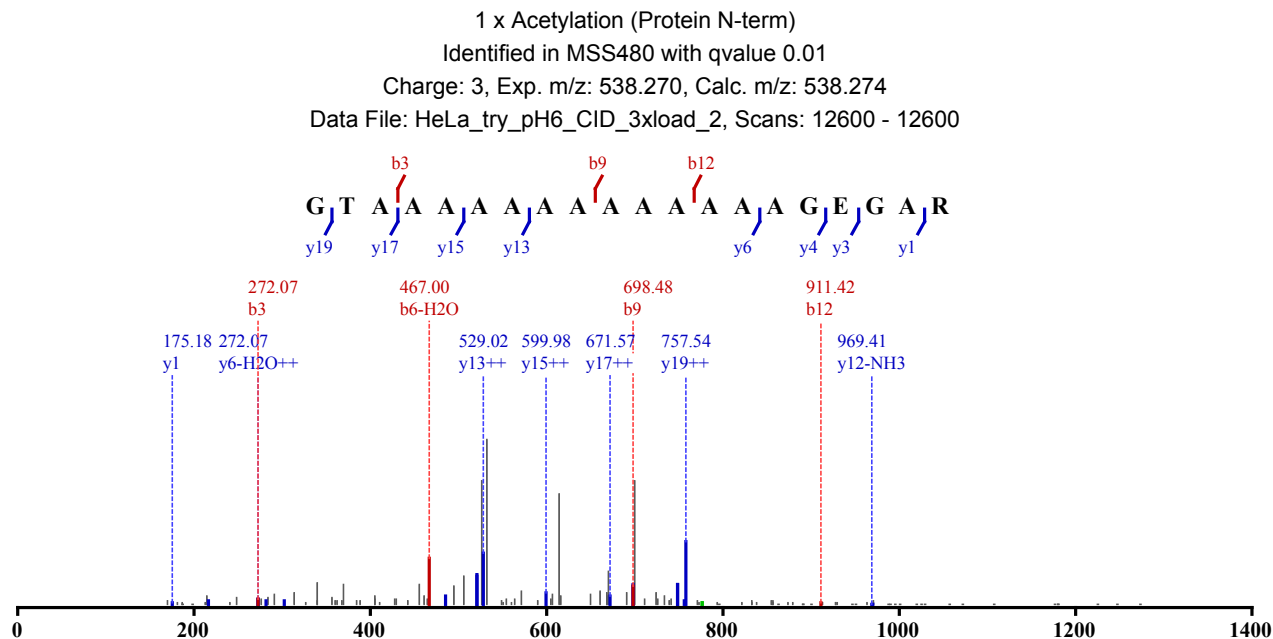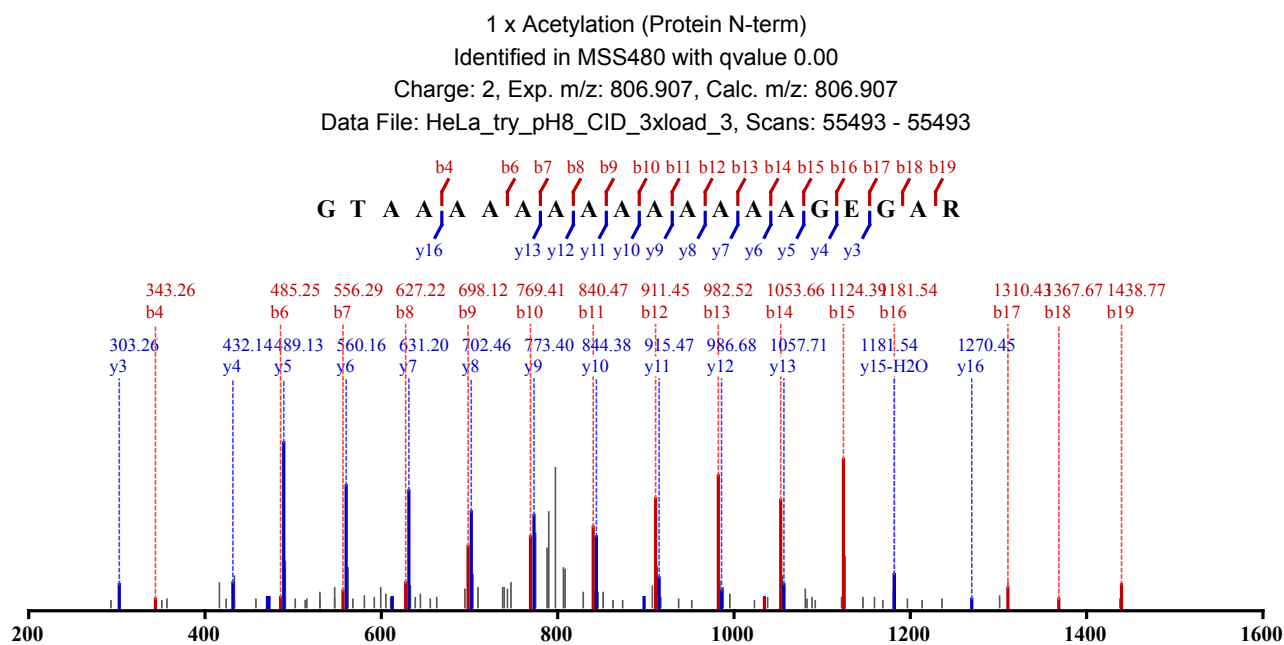

1 x Acetylation (Protein N-term)  
 Identified in MSS484 with qvalue 0.00  
 Charge: 2, Exp. m/z: 806.904, Calc. m/z: 806.907  
 Data File: HeLa\_Try\_pH11\_HCD\_1, Scans: 63243 - 63243

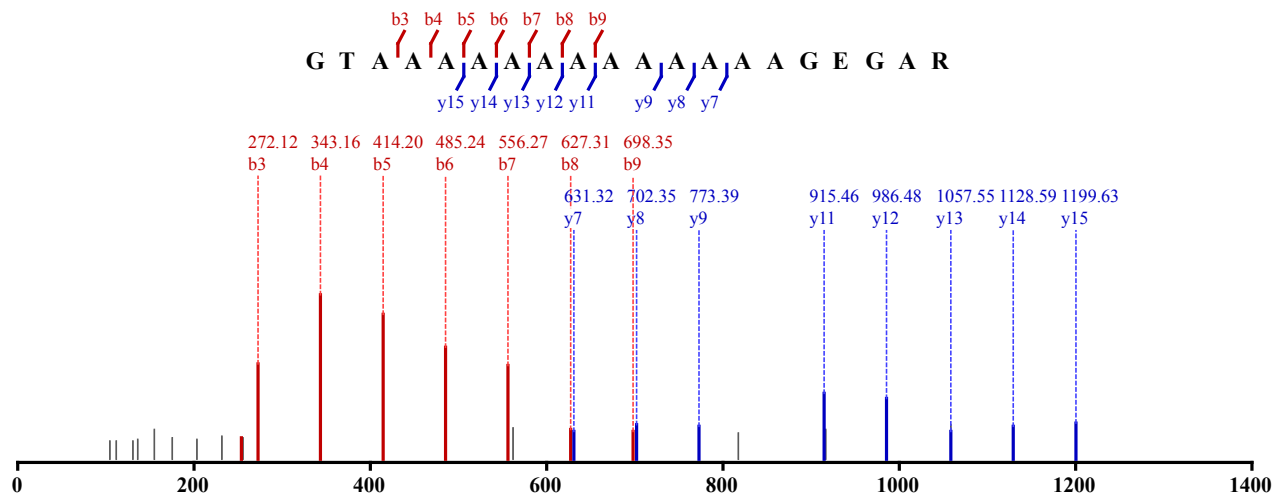

1 x Acetylation (Protein N-term)  
 Identified in MSS484 with qvalue 0.00  
 Charge: 2, Exp. m/z: 806.904, Calc. m/z: 806.907  
 Data File: HeLa\_Try\_pH11\_HCD\_2, Scans: 65015 - 65015

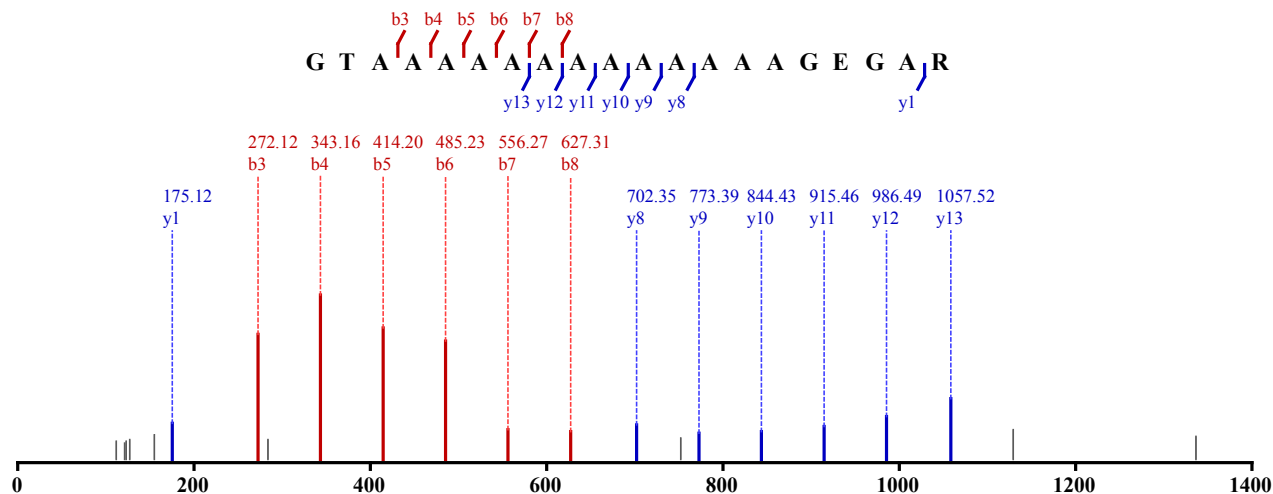

1 x Acetylation (Protein N-term)  
 Identified in MSS484 with qvalue 0.00  
 Charge: 2, Exp. m/z: 806.905, Calc. m/z: 806.907  
 Data File: HeLa\_Try\_pH8\_HCD\_1, Scans: 59275 - 59275

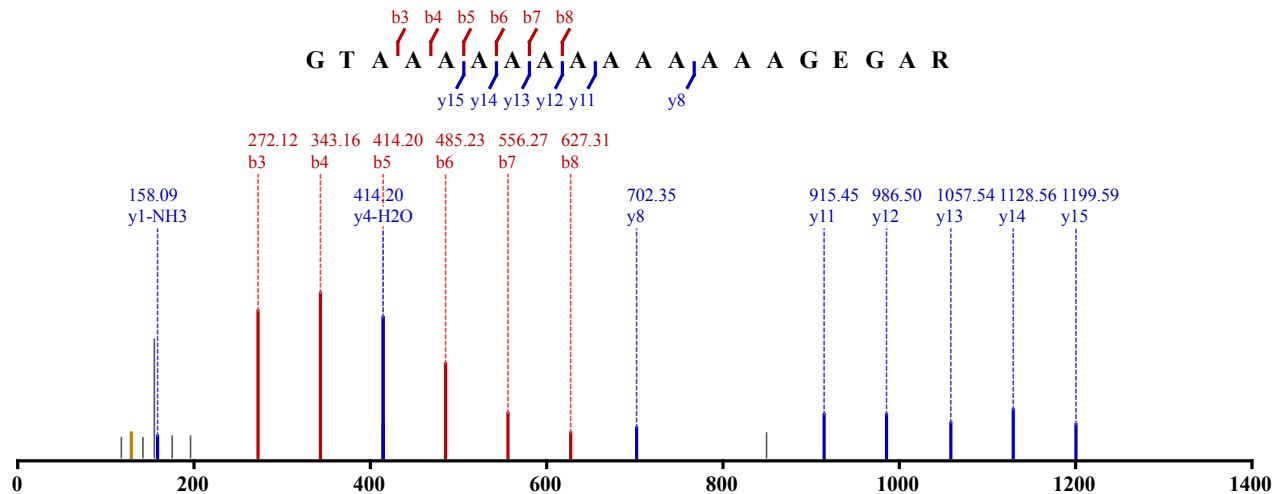

1 x Acetylation (Protein N-term)  
 Identified in MSS484 with qvalue 0.00  
 Charge: 2, Exp. m/z: 806.905, Calc. m/z: 806.907



Data File: HeLa\_Tryp\_pH11\_HCD\_2, Scans: 64947 - 64947

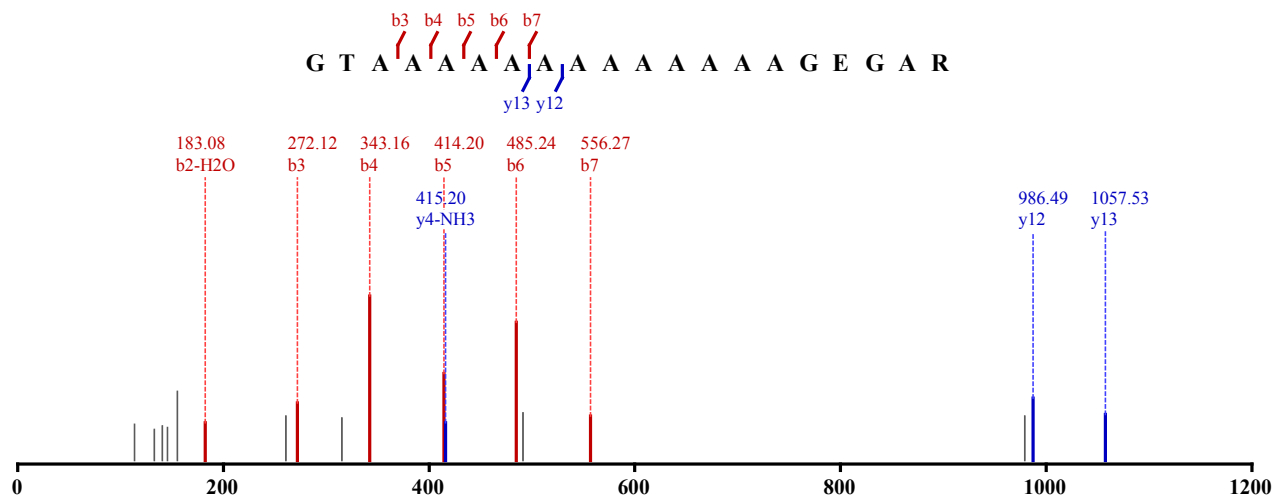

1 x Acetylation (Protein N-term)

Identified in MSS484 with qvalue 0.00

Charge: 2, Exp. m/z: 806.904, Calc. m/z: 806.907

Data File: HeLa\_Tryp\_pH11\_HCD\_3, Scans: 57146 - 57146

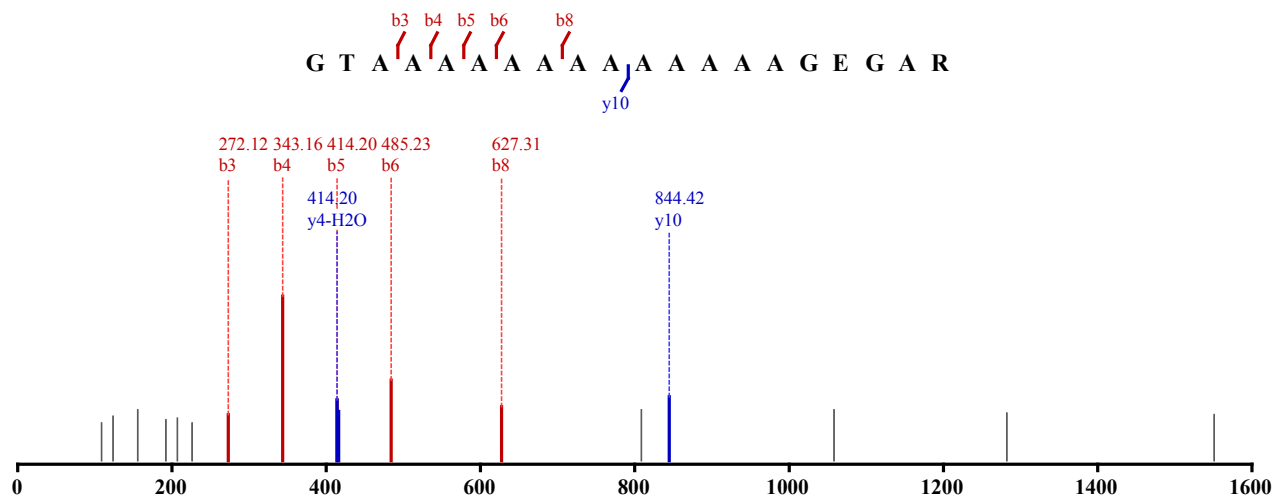

Not Modified

Identified in MSS30 with qvalue 0.00

Charge: 3, Exp. m/z: 888.771, Calc. m/z: 888.767

Data File: 20101224\_Velos1\_TaGe\_SA\_HeLa\_05, Scans: 19650 - 19650

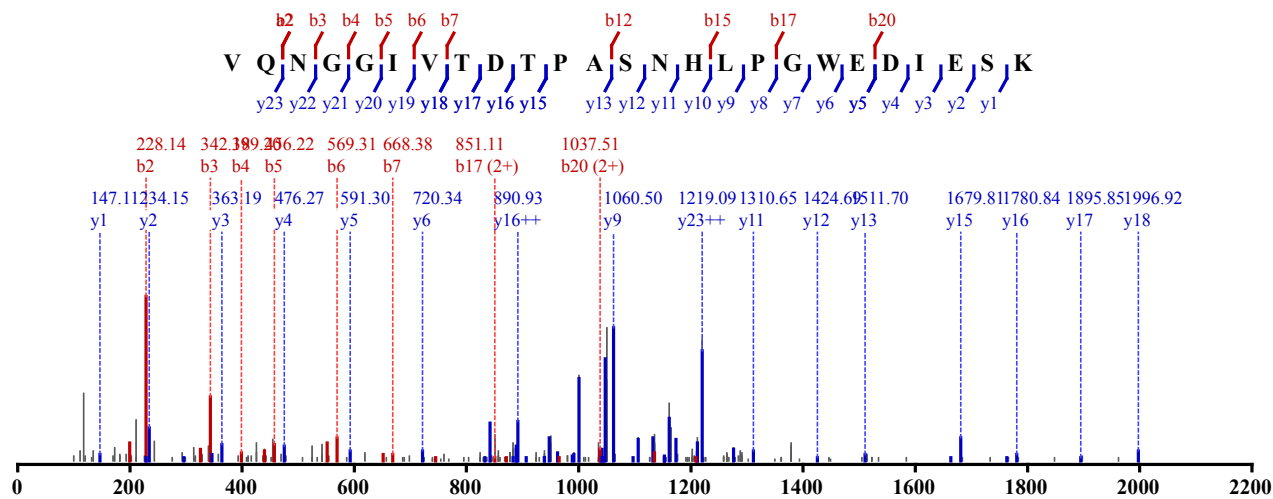

Not Modified

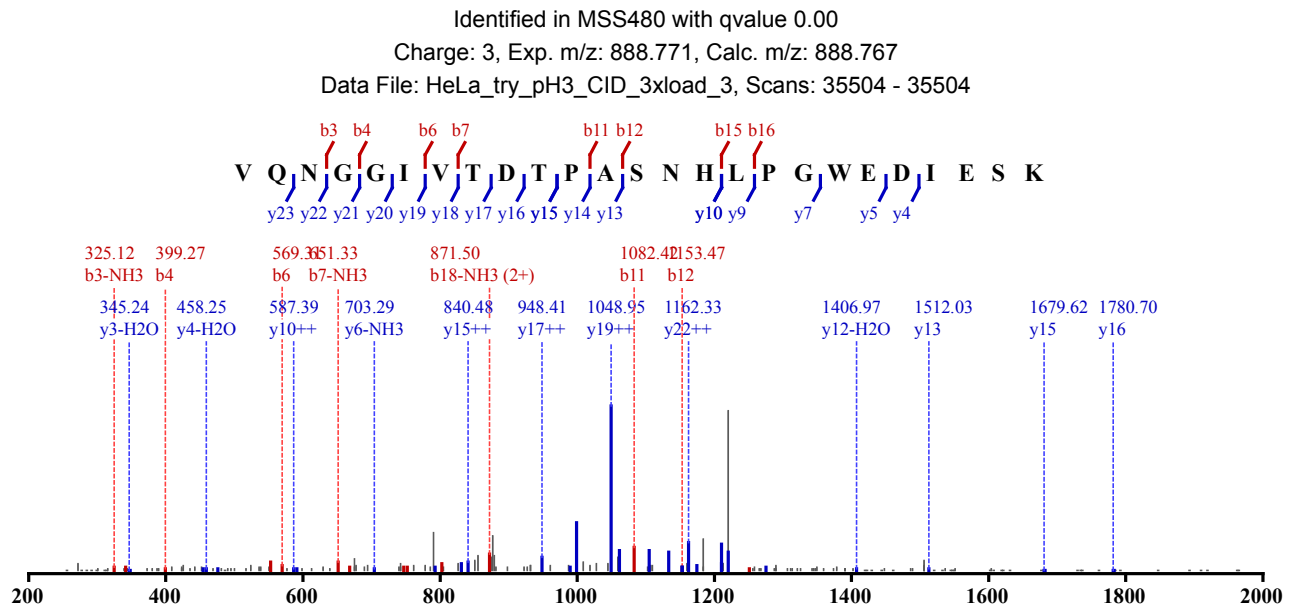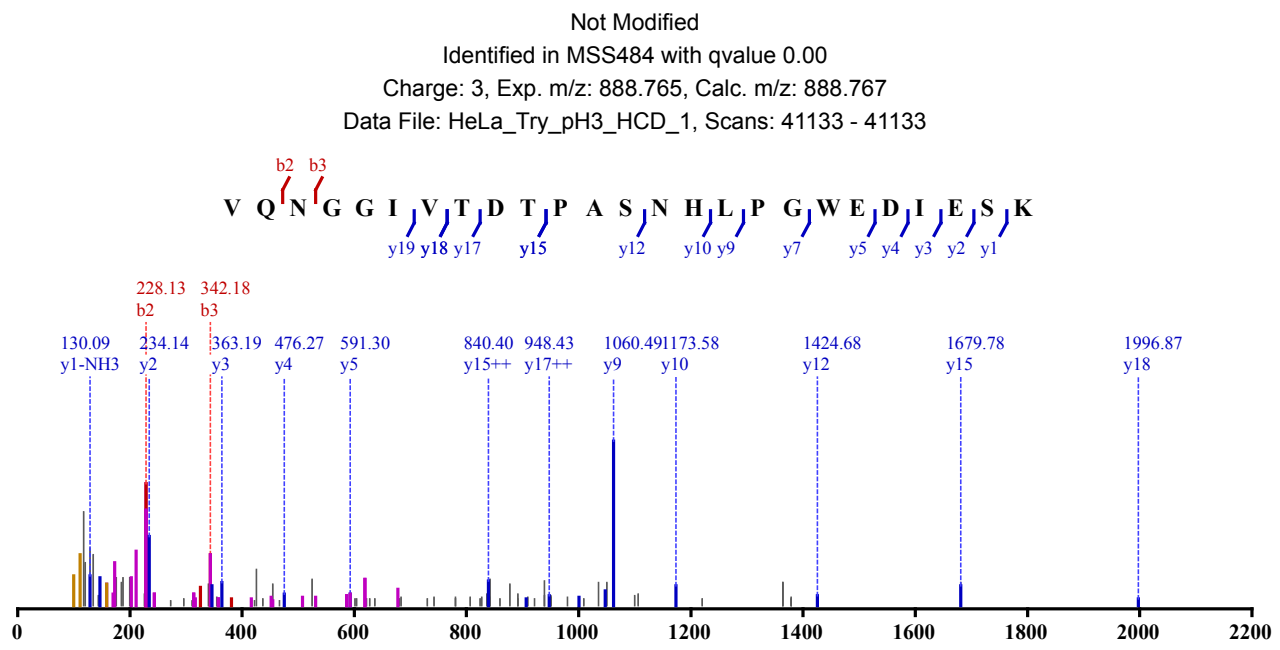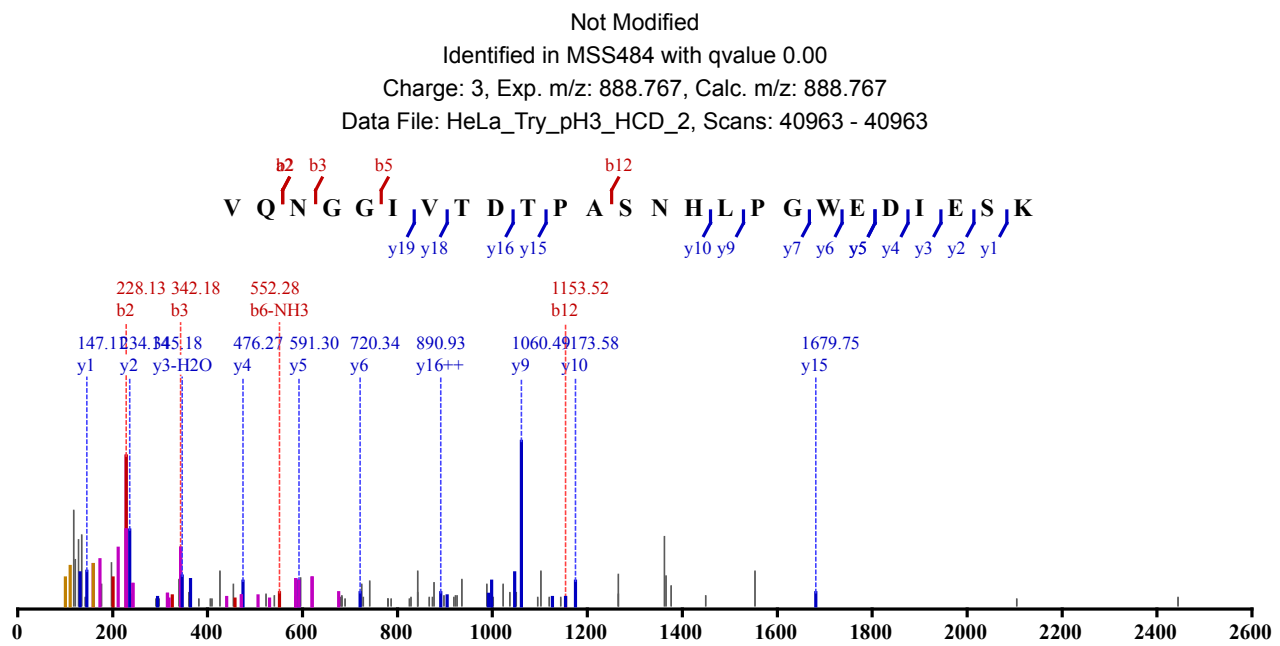

Not Modified

Identified in MSS484 with qvalue 0.00

Charge: 3, Exp. m/z: 888.768, Calc. m/z: 888.767

Data File: HeLa\_Try\_pH3\_HCD\_3, Scans: 40069 - 40069

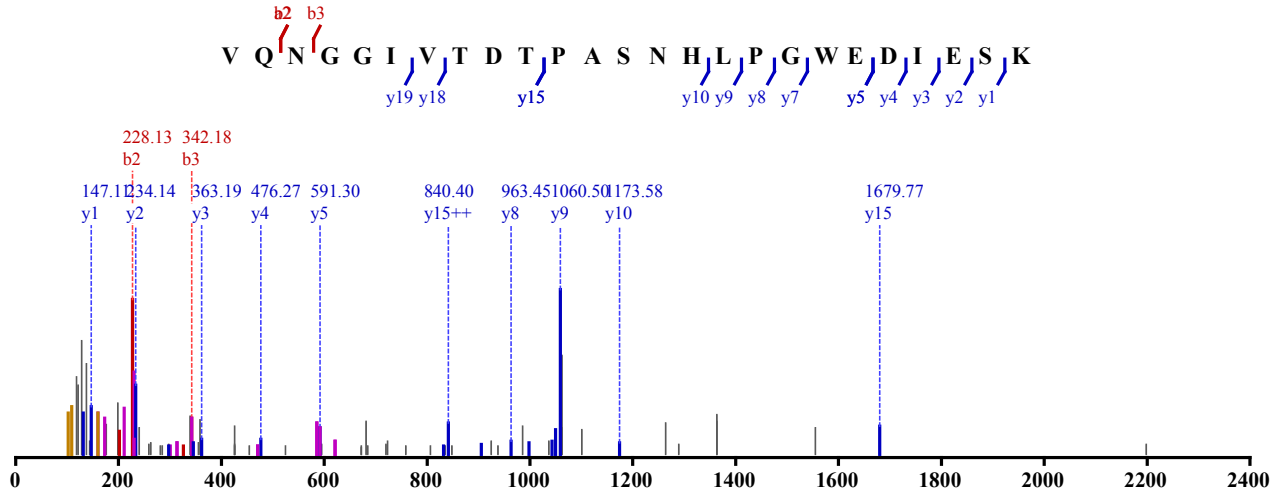

Not Modified

Identified in MSS485 with qvalue 0.00

Charge: 3, Exp. m/z: 888.767, Calc. m/z: 888.767

Data File: HeLa\_LysC\_pH3\_HCD\_1, Scans: 46573 - 46573

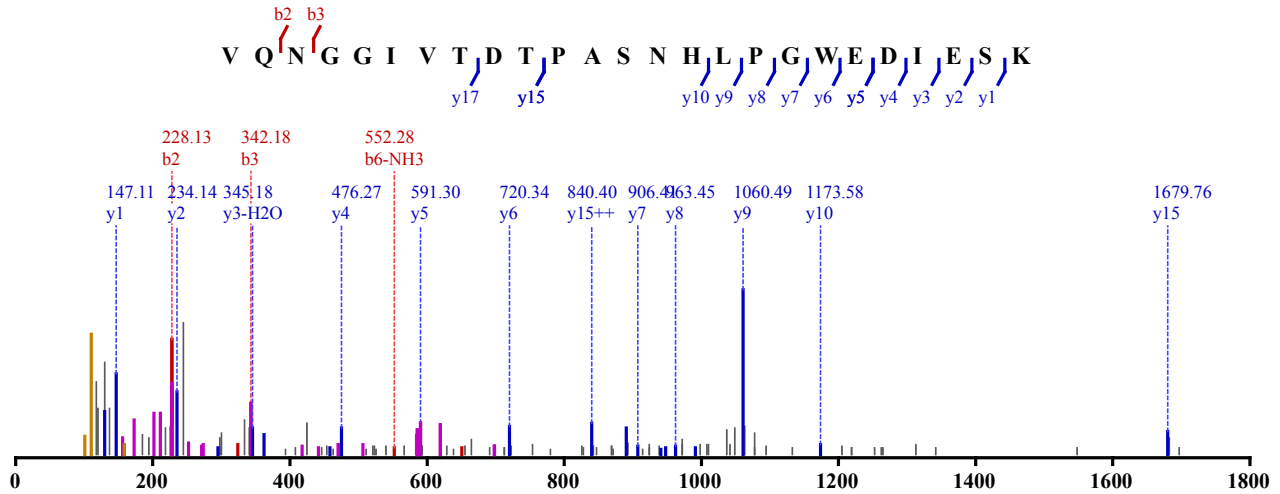

Not Modified

Identified in MSS480 with qvalue 0.00

Charge: 3, Exp. m/z: 713.023, Calc. m/z: 713.024

Data File: HeLa\_try\_pH4\_CID\_3xload, Scans: 25553 - 25553

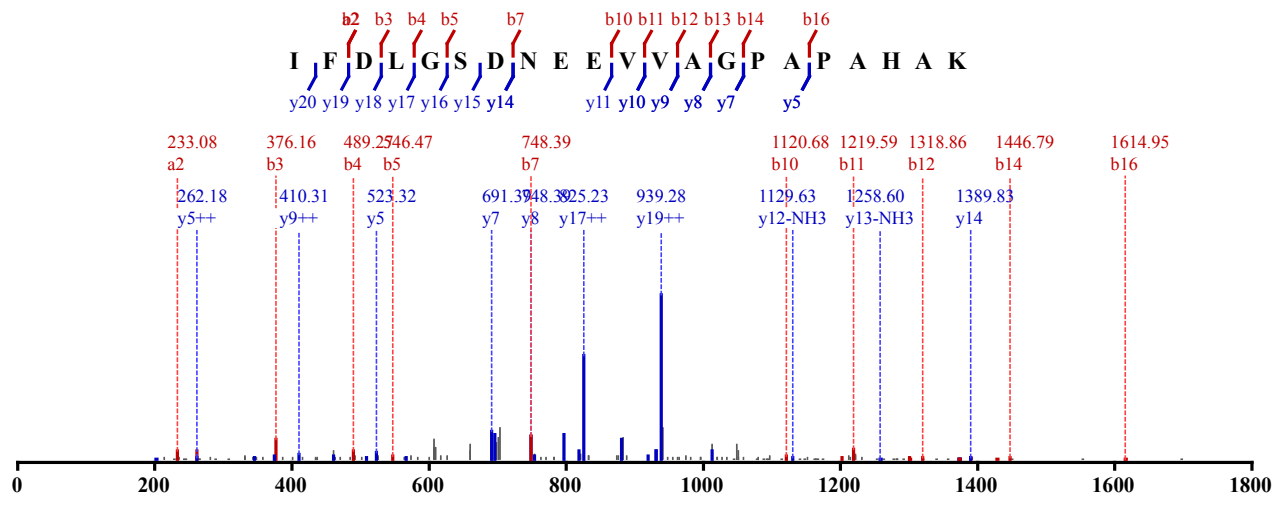

Not Modified  
 Identified in MSS484 with qvalue 0.00  
 Charge: 3, Exp. m/z: 713.022, Calc. m/z: 713.024  
 Data File: HeLa\_Try\_pH4\_HCD\_2, Scans: 37182 - 37182

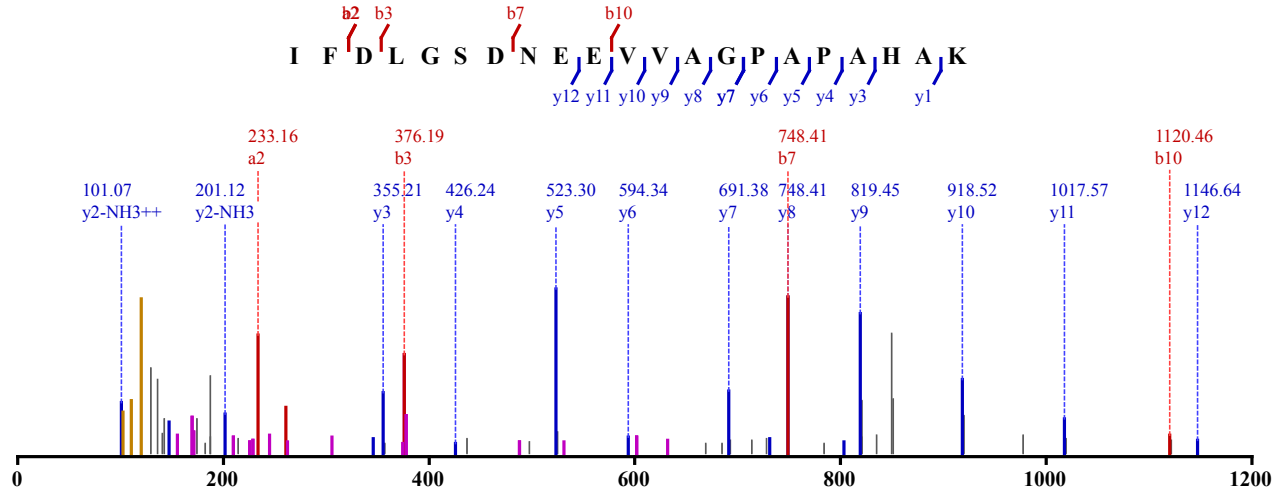

Not Modified  
 Identified in MSS479 with qvalue 0.00  
 Charge: 2, Exp. m/z: 717.874, Calc. m/z: 717.877  
 Data File: HeLa\_AspN\_pH8\_HCD\_3, Scans: 42774 - 42774

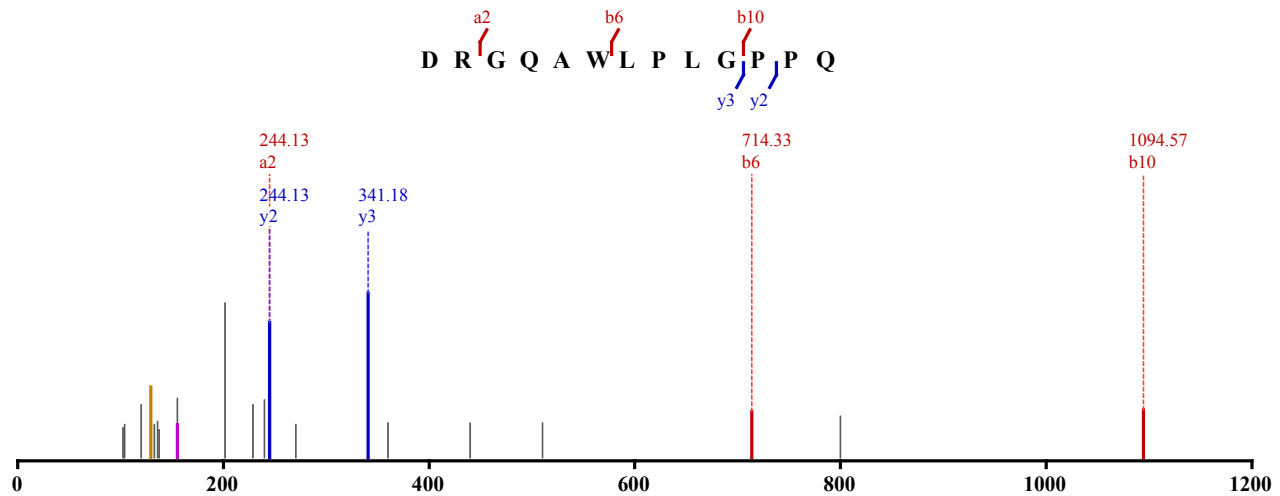

Not Modified  
 Identified in MSS479 with qvalue 0.00  
 Charge: 2, Exp. m/z: 717.878, Calc. m/z: 717.877

Data File: HeLa\_AspN\_pH11\_HCD\_1, Scans: 47711 - 47711

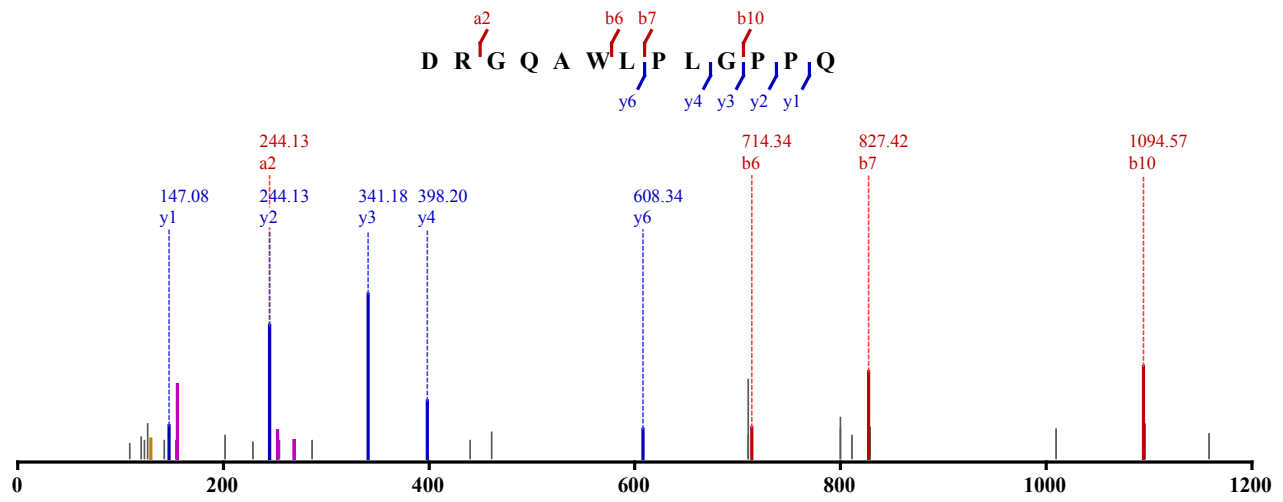

Not Modified

Identified in MSS479 with qvalue 0.00

Charge: 2, Exp. m/z: 717.878, Calc. m/z: 717.877

Data File: HeLa\_AspN\_pH11\_HCD\_1, Scans: 47777 - 47777

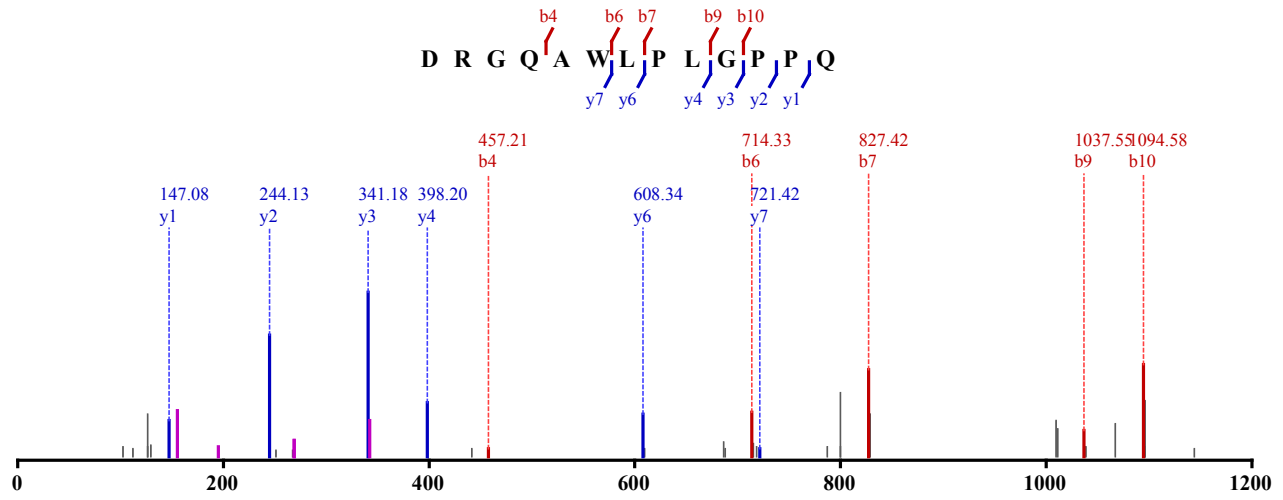

Not Modified

Identified in MSS479 with qvalue 0.00

Charge: 2, Exp. m/z: 717.878, Calc. m/z: 717.877

Data File: HeLa\_AspN\_pH11\_HCD\_2, Scans: 46521 - 46521

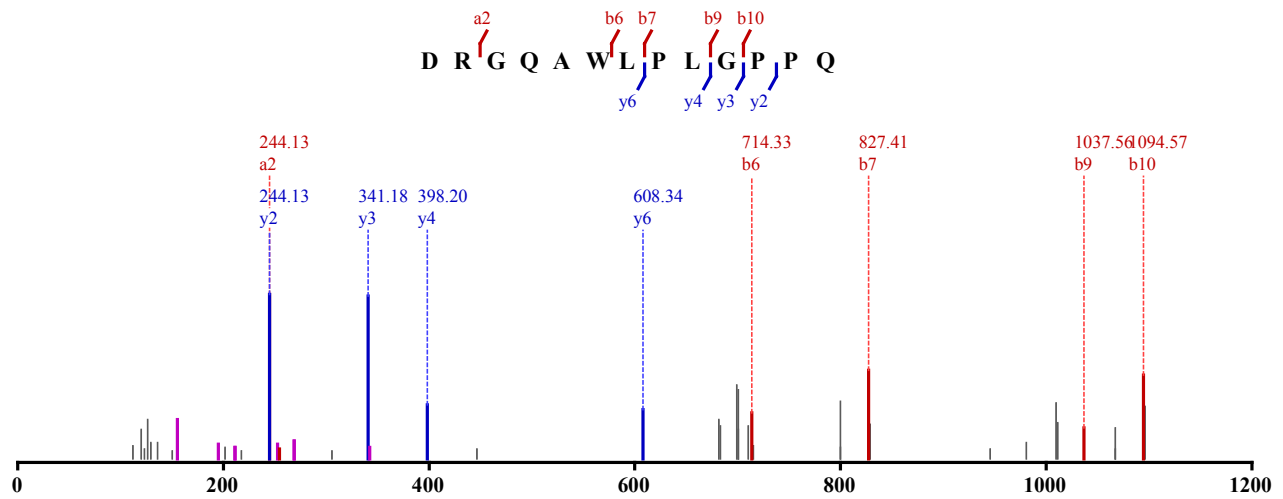

Not Modified

Identified in MSS479 with qvalue 0.00  
 Charge: 2, Exp. m/z: 717.877, Calc. m/z: 717.877  
 Data File: HeLa\_AspN\_pH11\_HCD\_2, Scans: 46587 - 46587

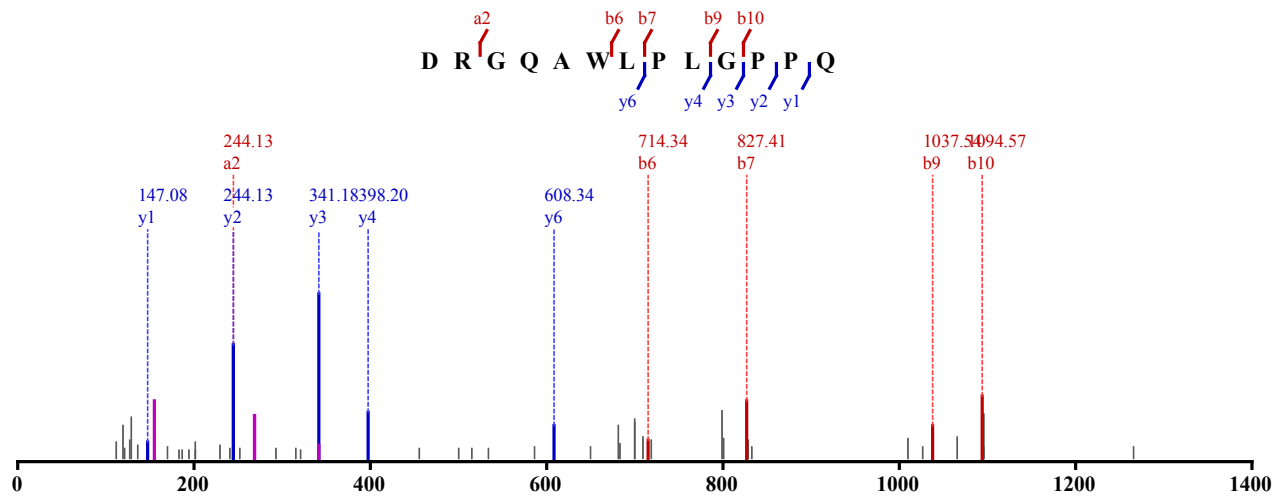

Not Modified  
 Identified in MSS479 with qvalue 0.00  
 Charge: 2, Exp. m/z: 717.879, Calc. m/z: 717.877  
 Data File: HeLa\_AspN\_pH11\_HCD\_3, Scans: 45602 - 45602

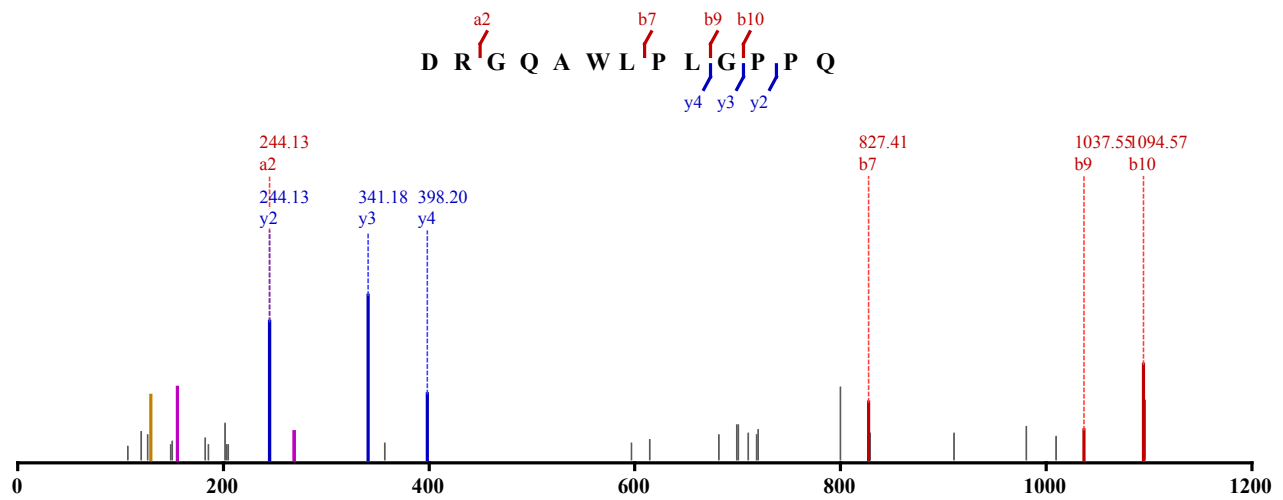

Not Modified  
 Identified in MSS479 with qvalue 0.00  
 Charge: 2, Exp. m/z: 717.877, Calc. m/z: 717.877  
 Data File: HeLa\_AspN\_pH11\_HCD\_3, Scans: 45676 - 45676

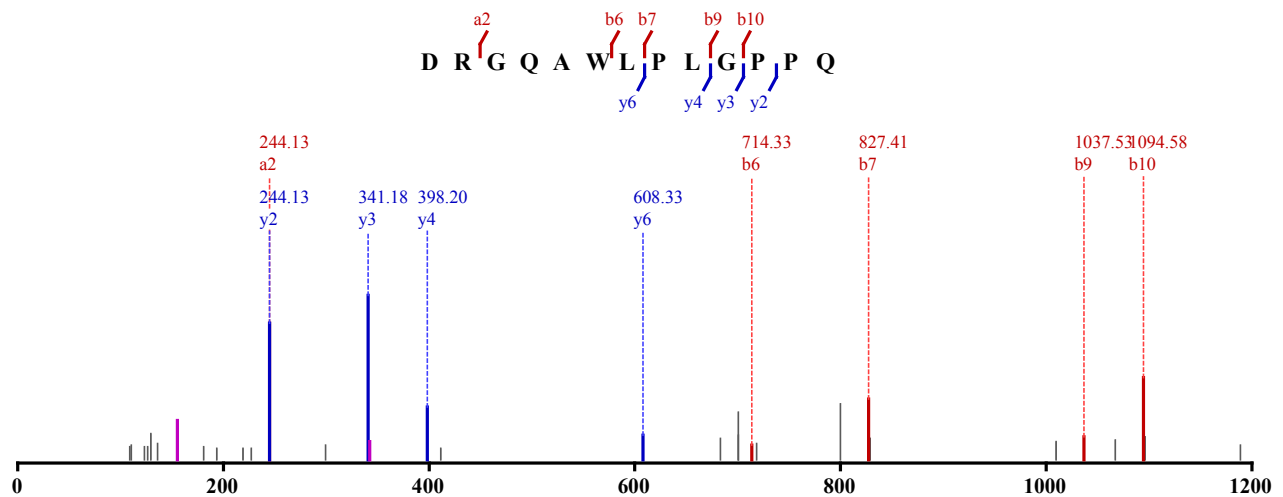

Not Modified

Identified in MSS479 with qvalue 0.00

Charge: 2, Exp. m/z: 717.878, Calc. m/z: 717.877

Data File: HeLa\_AspN\_pH8\_HCD\_1, Scans: 44648 - 44648

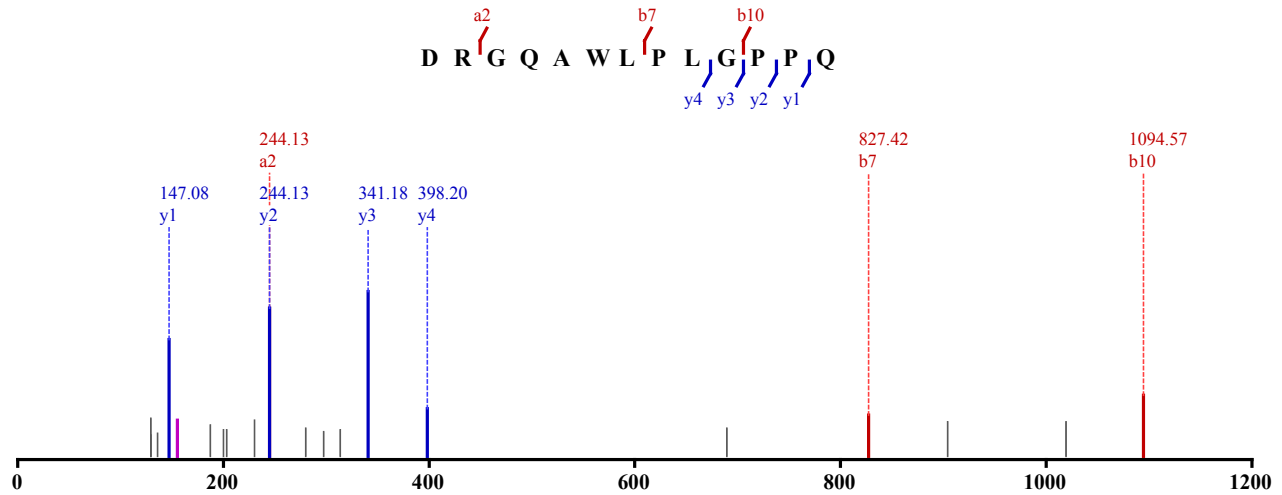

Not Modified

Identified in MSS483 with qvalue 0.00

Charge: 2, Exp. m/z: 717.878, Calc. m/z: 717.877

Data File: HeLa\_AspN\_pH11\_CID\_3xload\_2, Scans: 37248 - 37248

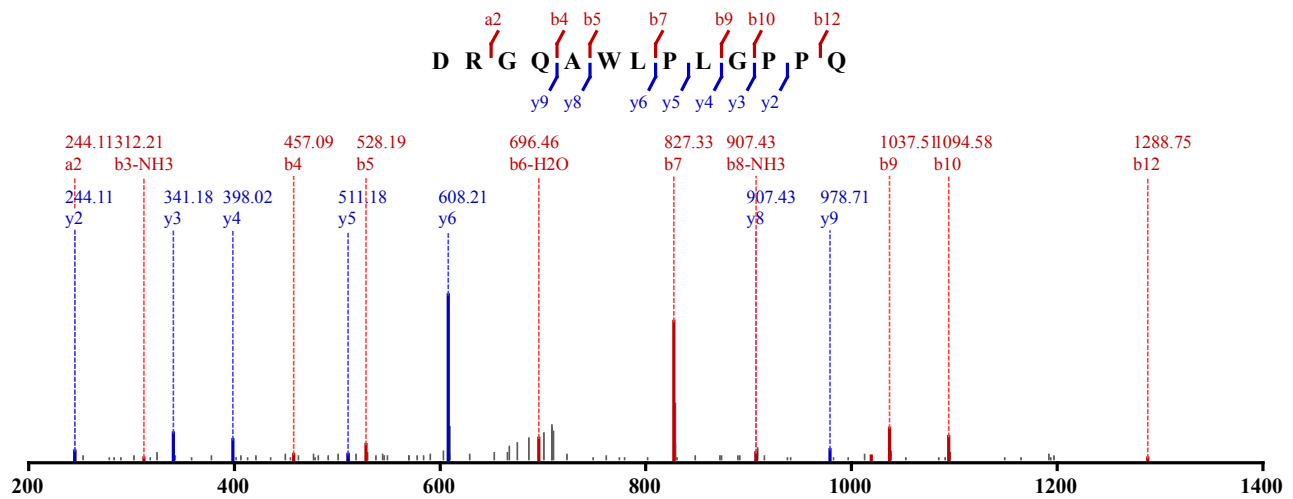

Not Modified

Identified in MSS483 with qvalue 0.00

Charge: 2, Exp. m/z: 717.878, Calc. m/z: 717.877

Data File: HeLa\_AspN\_pH11\_CID\_3xload\_2, Scans: 37321 - 37321

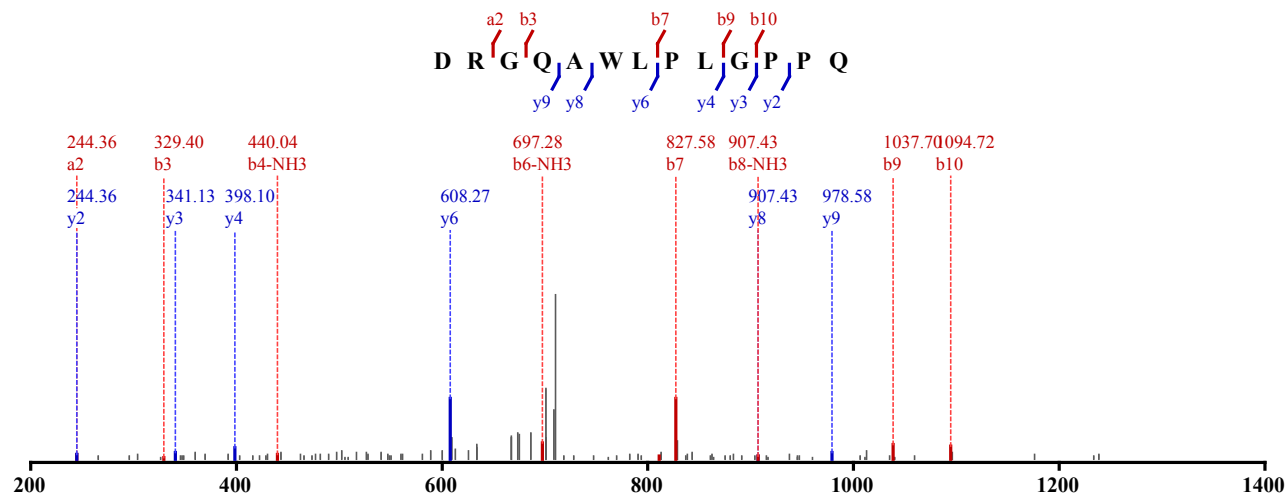

Not Modified  
 Identified in MSS484 with qvalue 0.00  
 Charge: 3, Exp. m/z: 962.461, Calc. m/z: 962.461  
 Data File: HeLa\_Try\_80pcACN\_HCD\_3, Scans: 42189 - 42189

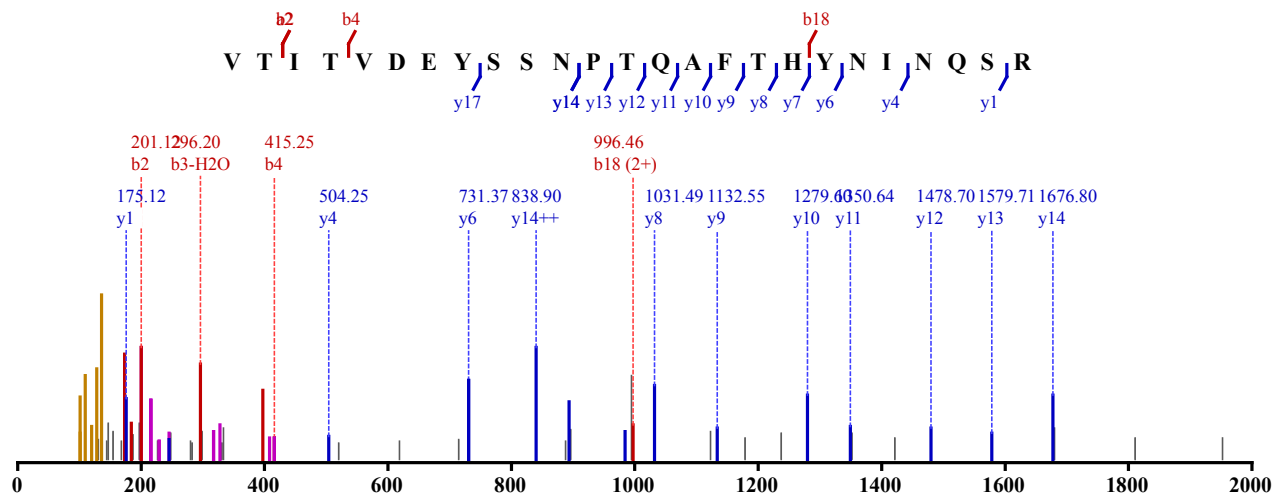

Not Modified  
 Identified in MSS479 with qvalue 0.00  
 Charge: 3, Exp. m/z: 661.636, Calc. m/z: 661.637  
 Data File: HeLa\_AspN\_pH3\_HCD\_2, Scans: 17163 - 17163

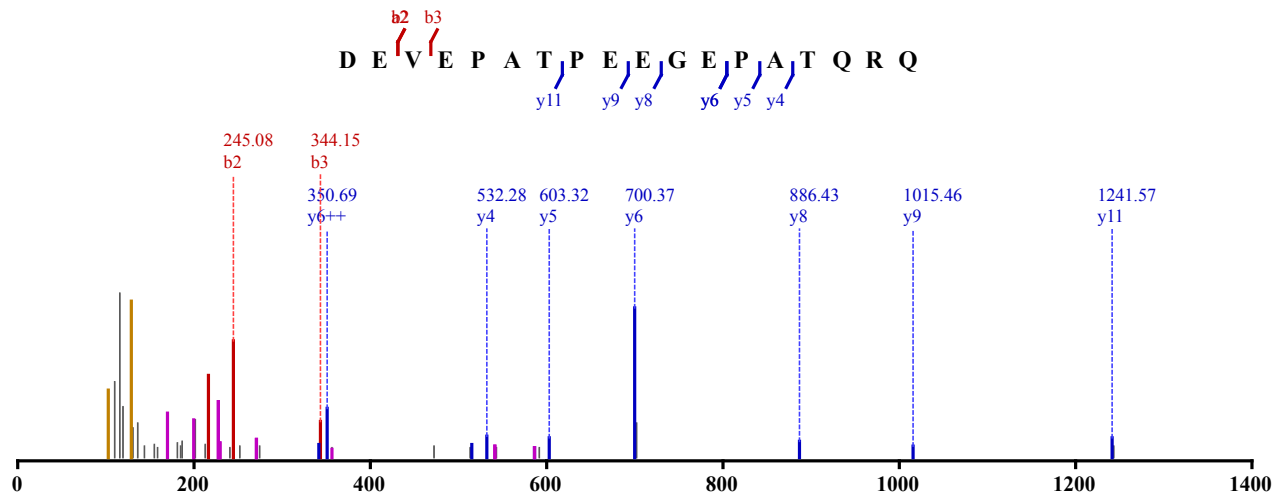

Not Modified  
 Identified in MSS479 with qvalue 0.00  
 Charge: 2, Exp. m/z: 991.950, Calc. m/z: 991.952



Data File: HeLa\_AspN\_pH3\_HCD\_1, Scans: 17752 - 17752

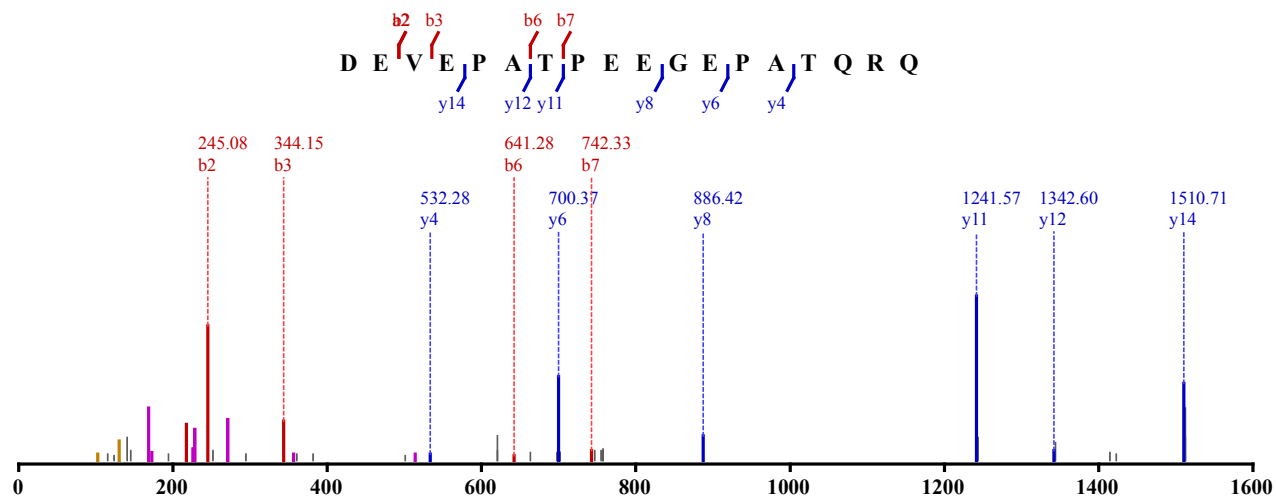

Not Modified

Identified in MSS479 with qvalue 0.00

Charge: 3, Exp. m/z: 661.636, Calc. m/z: 661.637

Data File: HeLa\_AspN\_pH3\_HCD\_1, Scans: 17770 - 17770

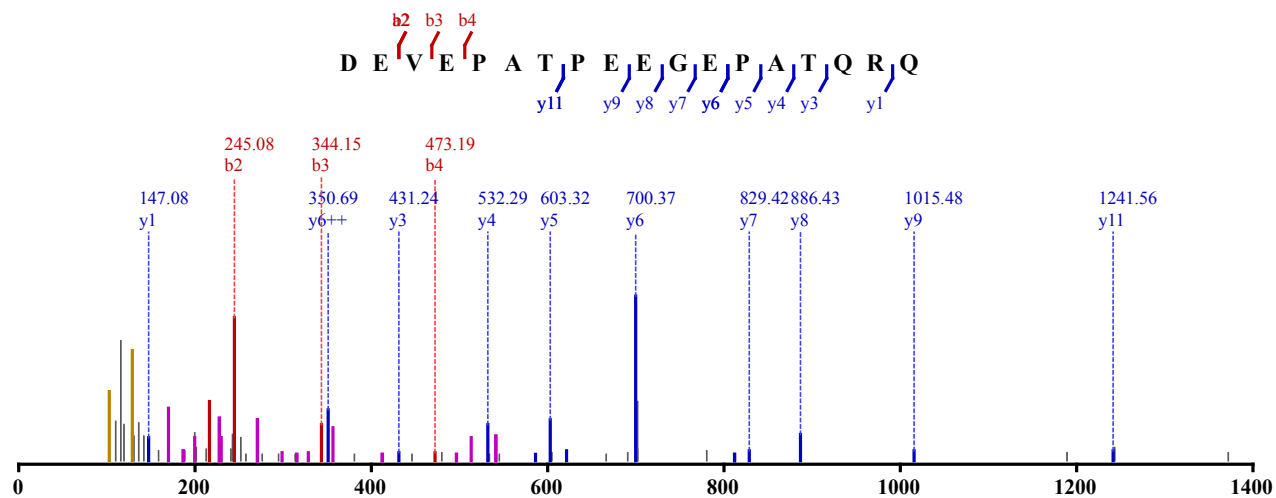

Not Modified

Identified in MSS479 with qvalue 0.00

Charge: 2, Exp. m/z: 991.950, Calc. m/z: 991.952

Data File: HeLa\_AspN\_pH3\_HCD\_2, Scans: 17144 - 17144

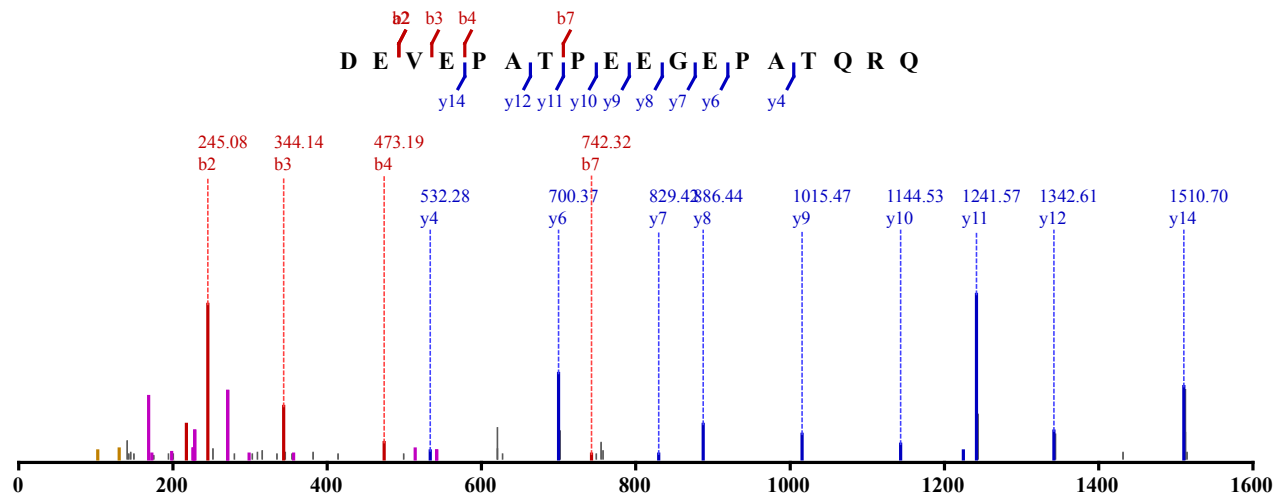

Not Modified

Identified in MSS479 with qvalue 0.00  
 Charge: 2, Exp. m/z: 991.949, Calc. m/z: 991.952  
 Data File: HeLa\_AspN\_pH3\_HCD\_3, Scans: 17196 - 17196

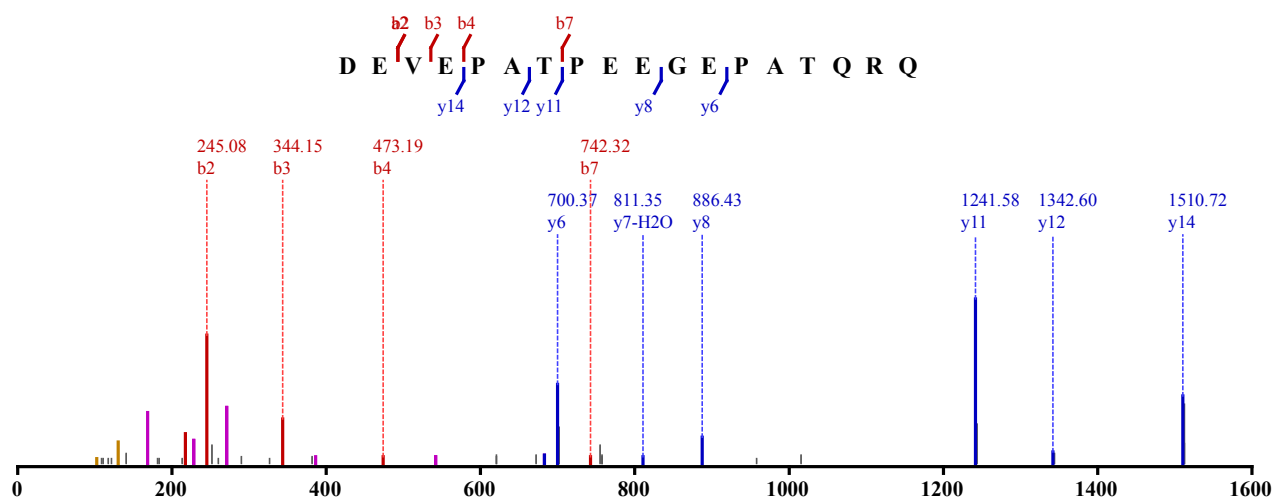

Not Modified  
 Identified in MSS479 with qvalue 0.01  
 Charge: 3, Exp. m/z: 661.635, Calc. m/z: 661.637  
 Data File: HeLa\_AspN\_pH3\_HCD\_3, Scans: 17215 - 17215

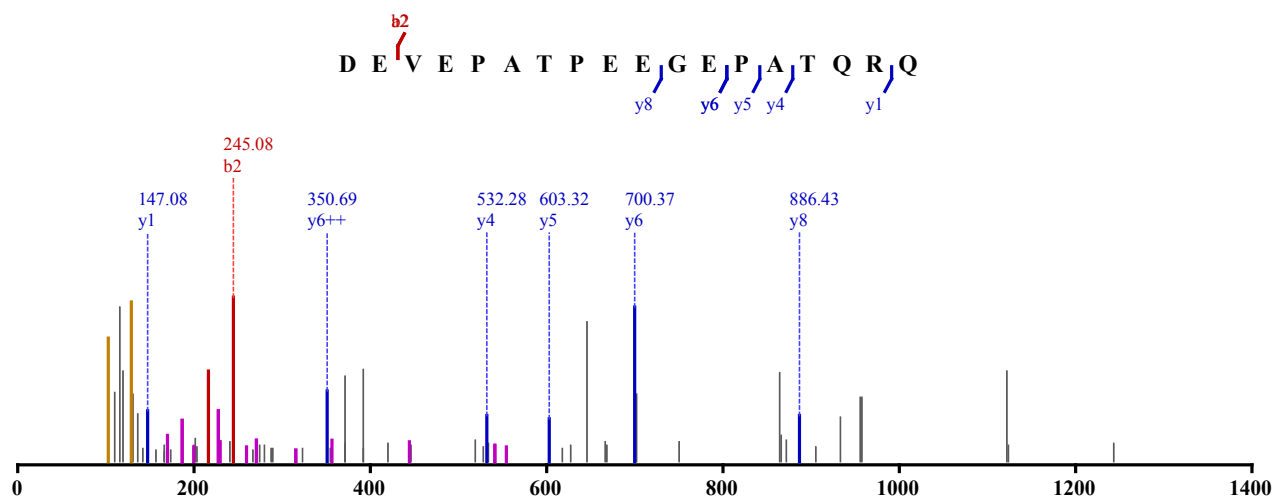

Not Modified  
 Identified in MSS483 with qvalue 0.00  
 Charge: 3, Exp. m/z: 661.637, Calc. m/z: 661.637  
 Data File: HeLa\_AspN\_pH3\_CID\_3xload\_2, Scans: 11713 - 11713

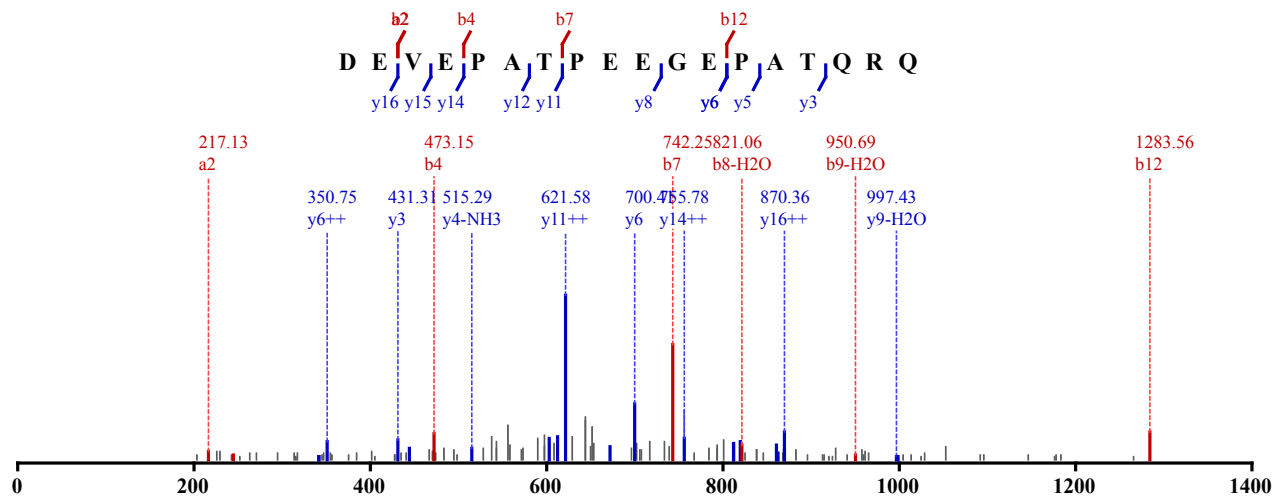

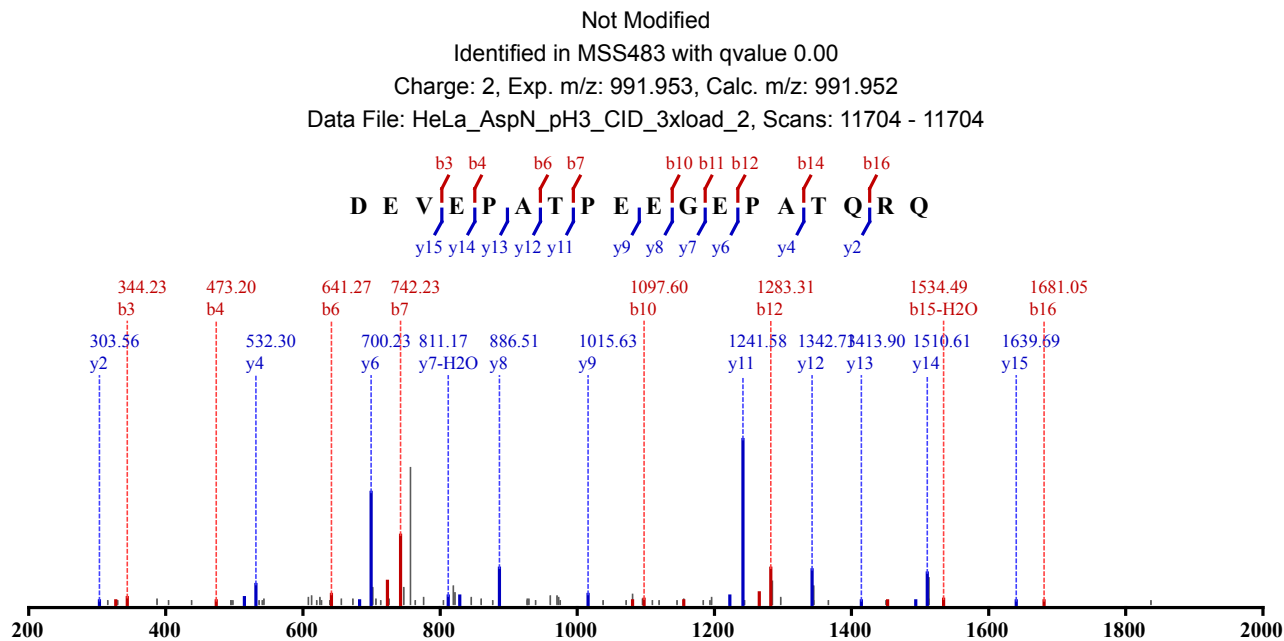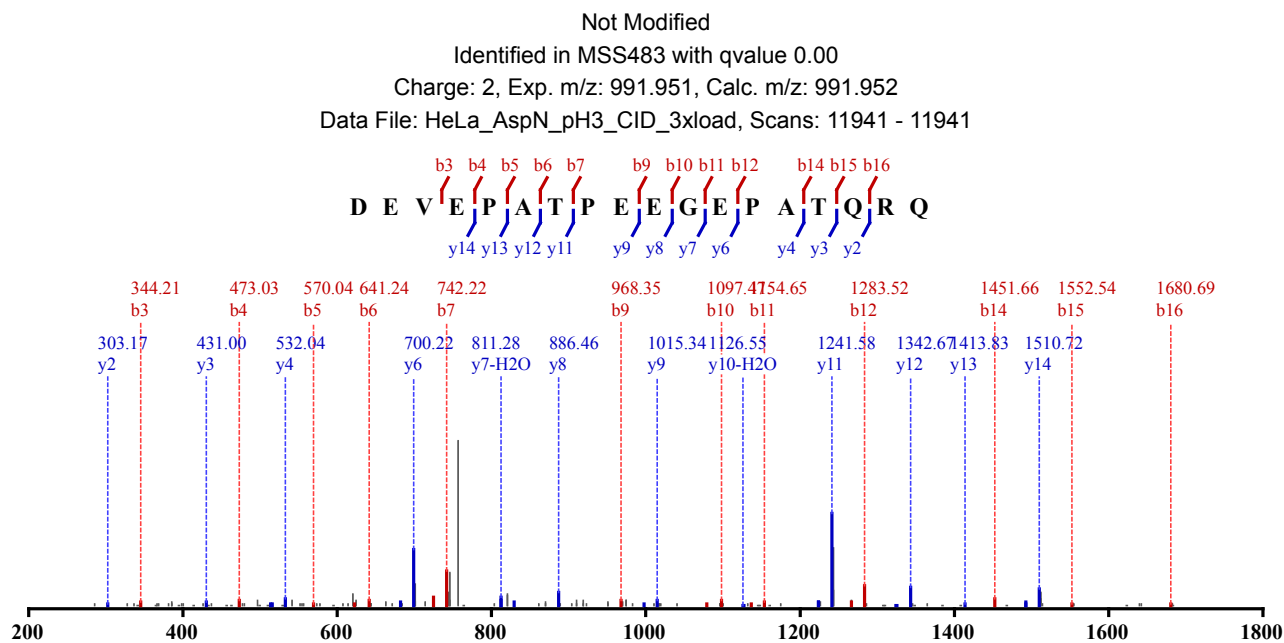

Not Modified  
 Identified in MSS484 with qvalue 0.00  
 Charge: 3, Exp. m/z: 368.854, Calc. m/z: 368.854  
 Data File: HeLa\_Try\_pH5\_HCD\_3, Scans: 22044 - 22044

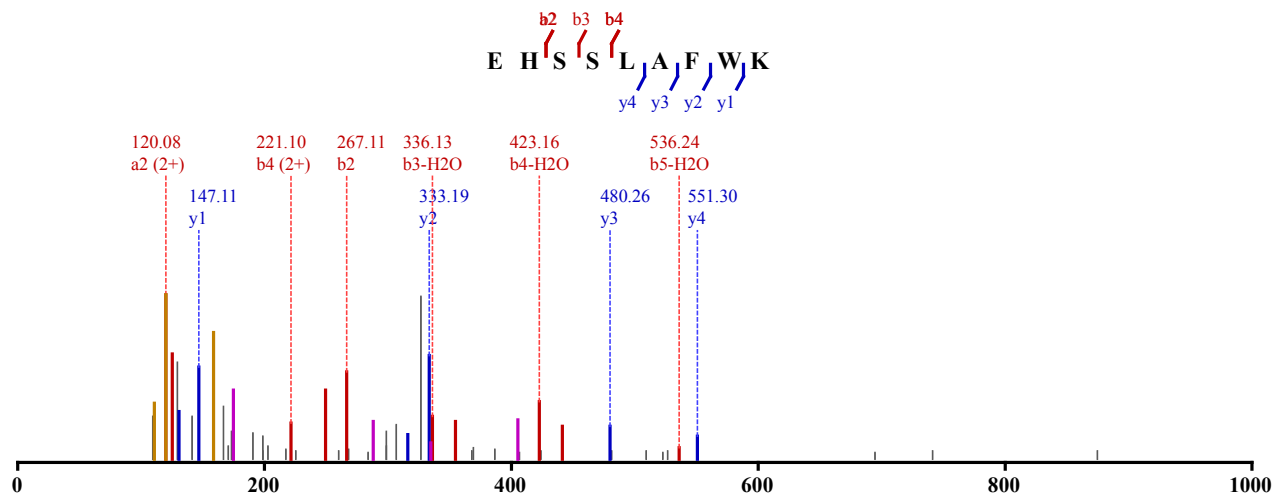

Not Modified

Identified in MSS485 with qvalue 0.00

Charge: 3, Exp. m/z: 368.854, Calc. m/z: 368.854

Data File: HeLa\_LysC\_pH6\_HCD\_2, Scans: 28863 - 28863

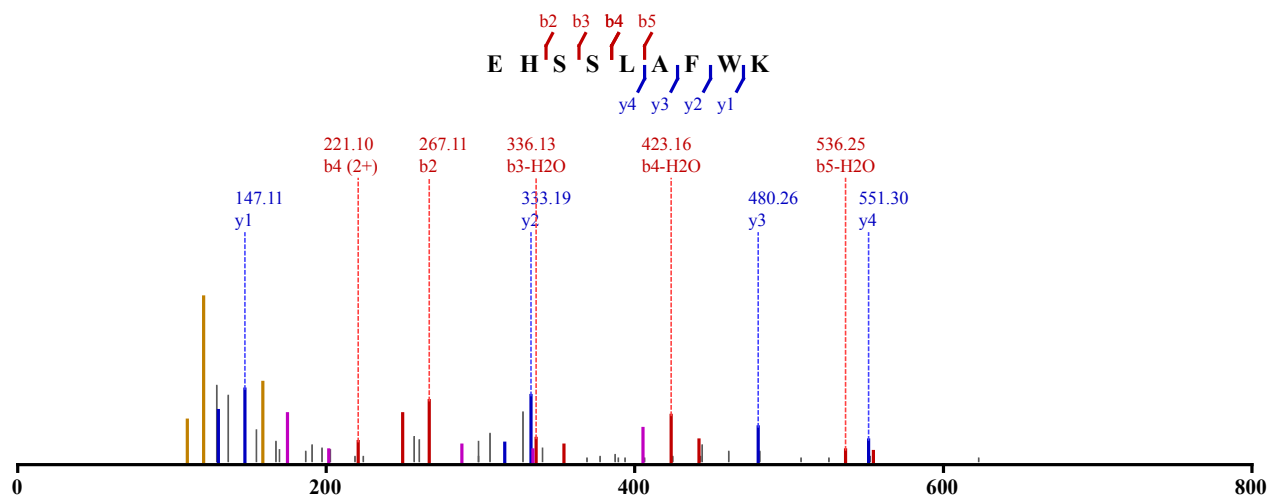

Not Modified

Identified in MSS485 with qvalue 0.00

Charge: 2, Exp. m/z: 552.778, Calc. m/z: 552.777

Data File: HeLa\_LysC\_pH6\_HCD\_2, Scans: 28851 - 28851

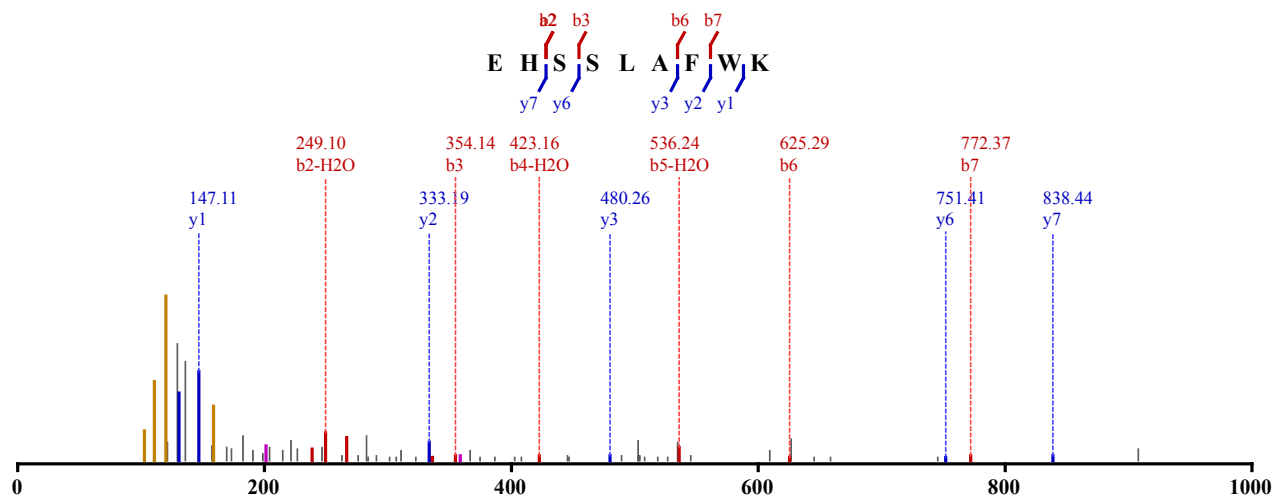

Not Modified

Identified in MSS485 with qvalue 0.00

Charge: 3, Exp. m/z: 368.854, Calc. m/z: 368.854

Data File: HeLa\_LysC\_pH6\_HCD\_3, Scans: 29384 - 29384

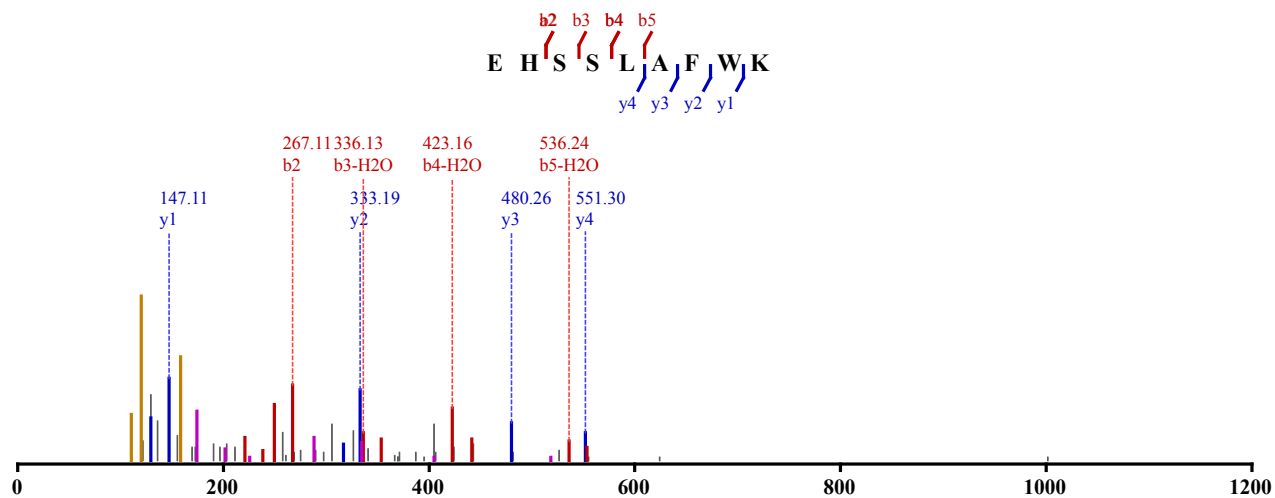

Not Modified

Identified in MSS487 with qvalue 0.00

Charge: 2, Exp. m/z: 552.777, Calc. m/z: 552.777

Data File: HeLa\_ArgC-Try\_pH5\_HCD\_1, Scans: 21908 - 21908

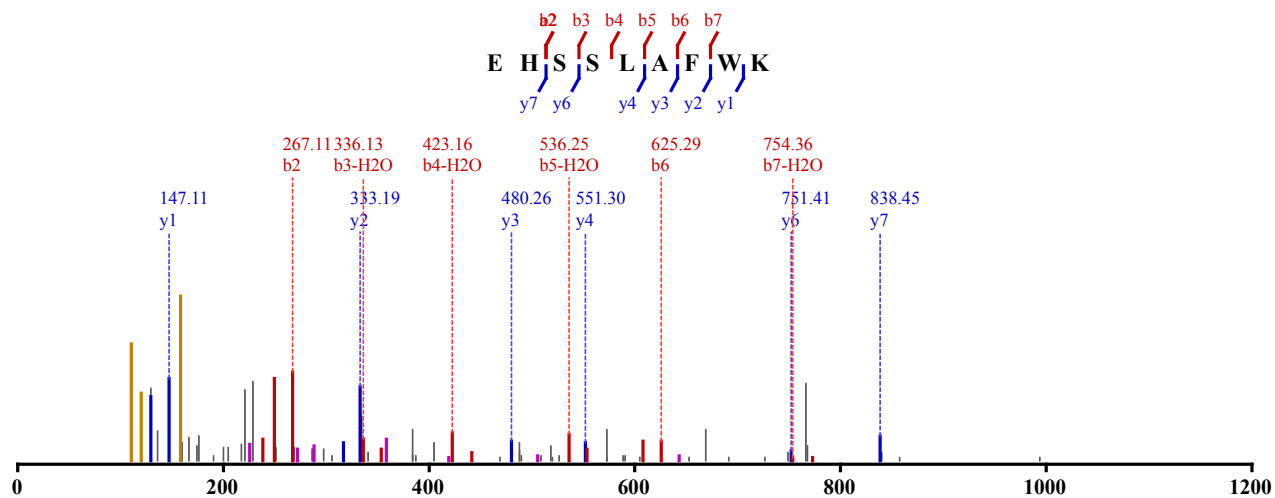

Not Modified

Identified in MSS487 with qvalue 0.00

Charge: 3, Exp. m/z: 368.854, Calc. m/z: 368.854

Data File: HeLa\_ArgC-Try\_pH4\_HCD\_2, Scans: 22596 - 22596

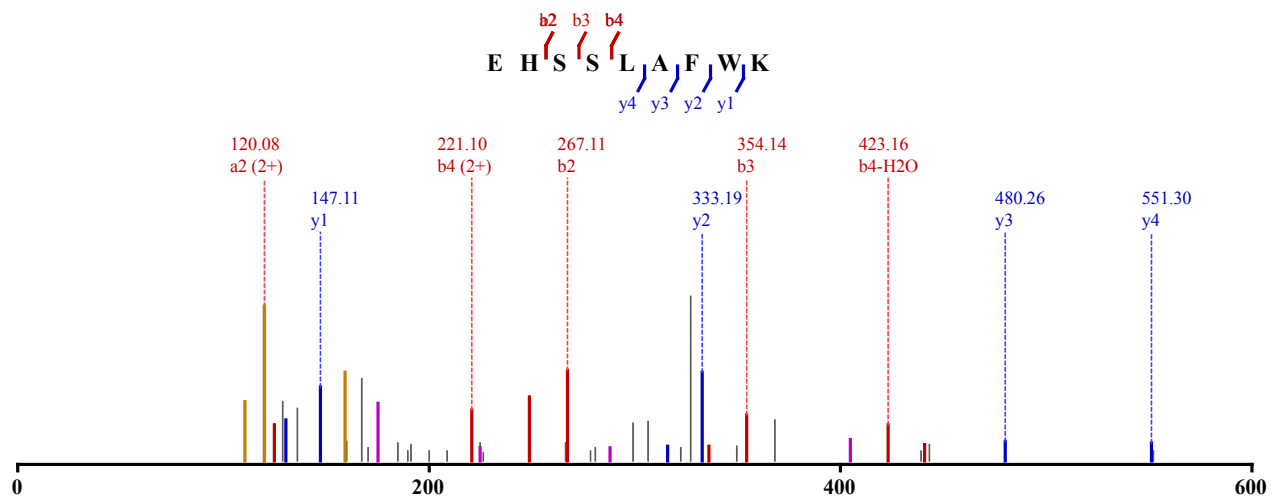

Not Modified



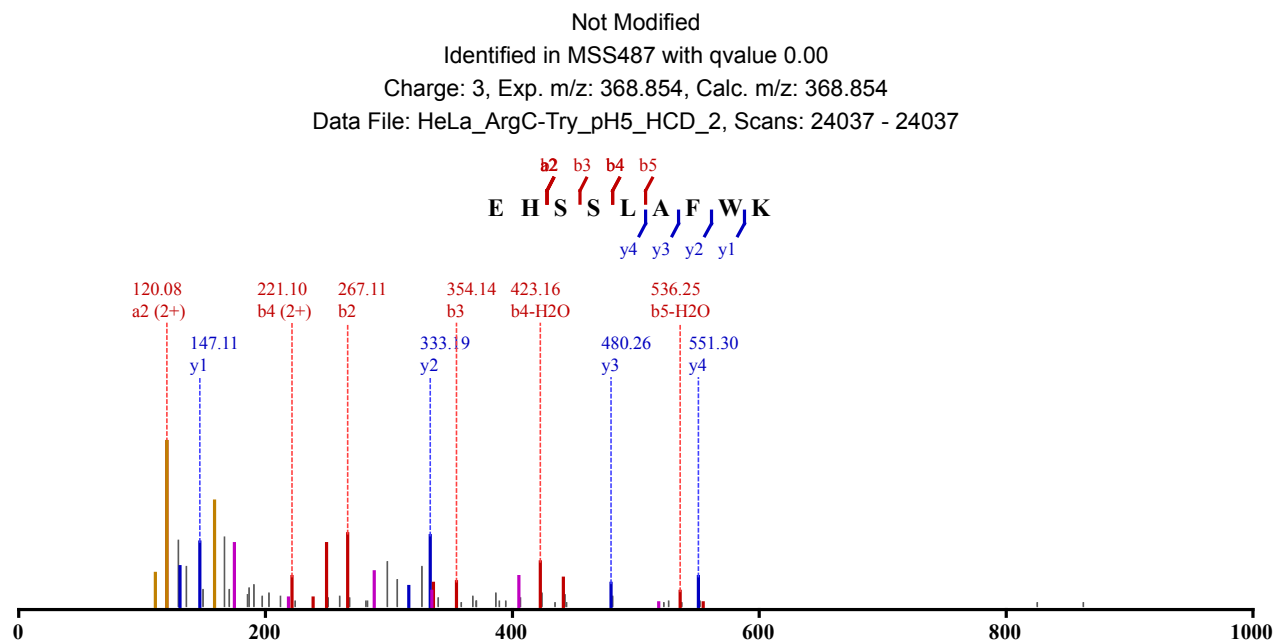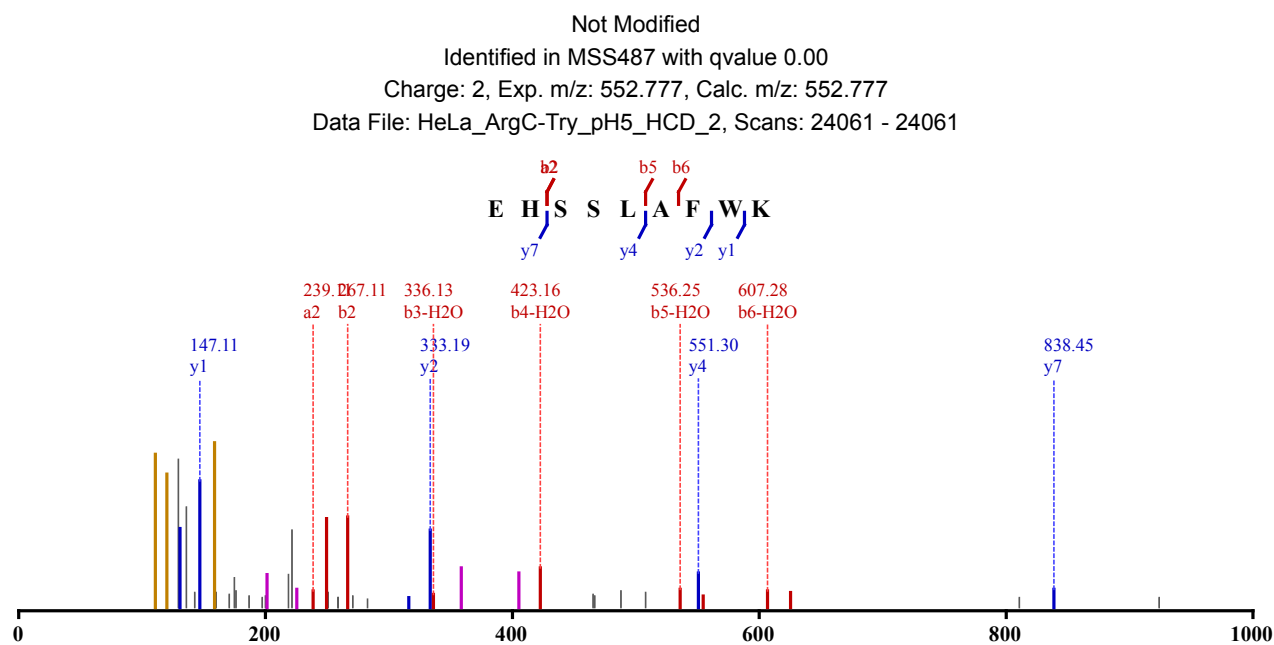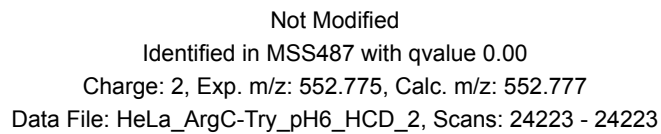

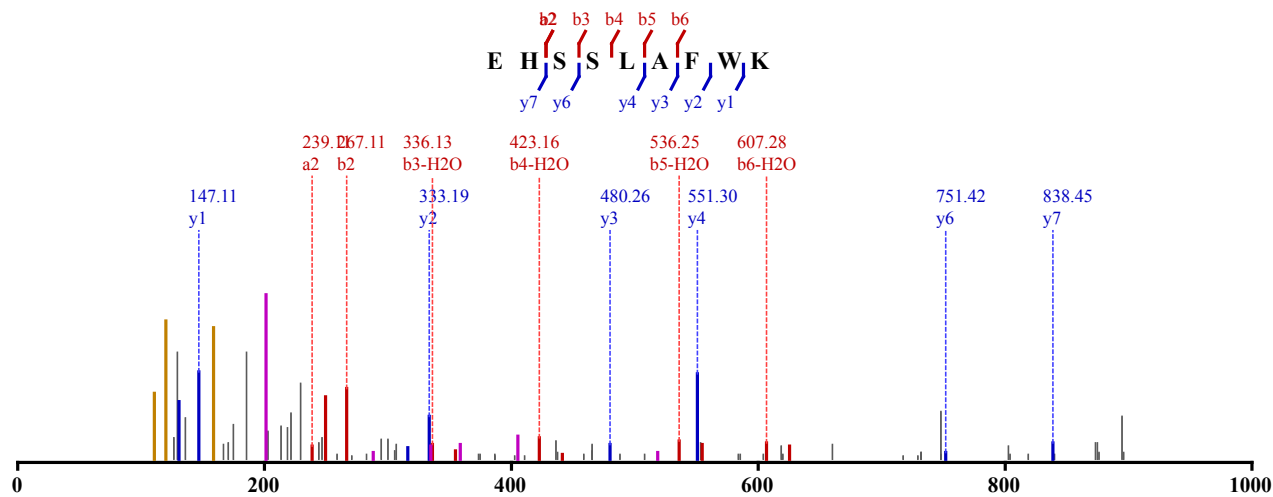

Not Modified  
 Identified in MSS487 with qvalue 0.00  
 Charge: 2, Exp. m/z: 552.777, Calc. m/z: 552.777  
 Data File: HeLa\_ArgC-Try\_pH5\_HCD\_2, Scans: 23971 - 23971

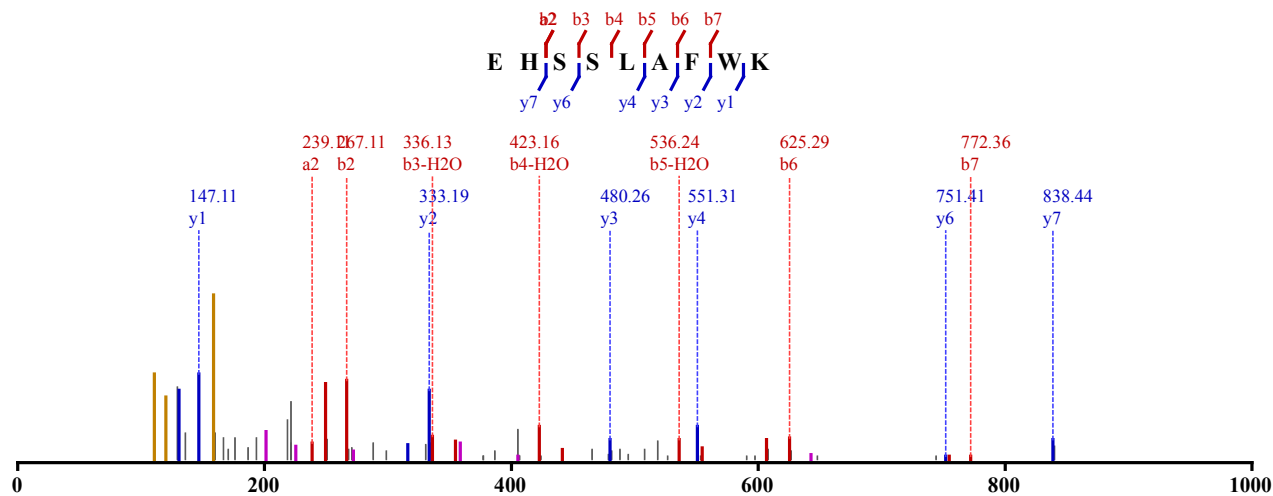

Not Modified  
 Identified in MSS484 with qvalue 0.00  
 Charge: 2, Exp. m/z: 978.461, Calc. m/z: 978.462  
 Data File: HeLa\_Try\_pH6\_HCD\_1, Scans: 41144 - 41144

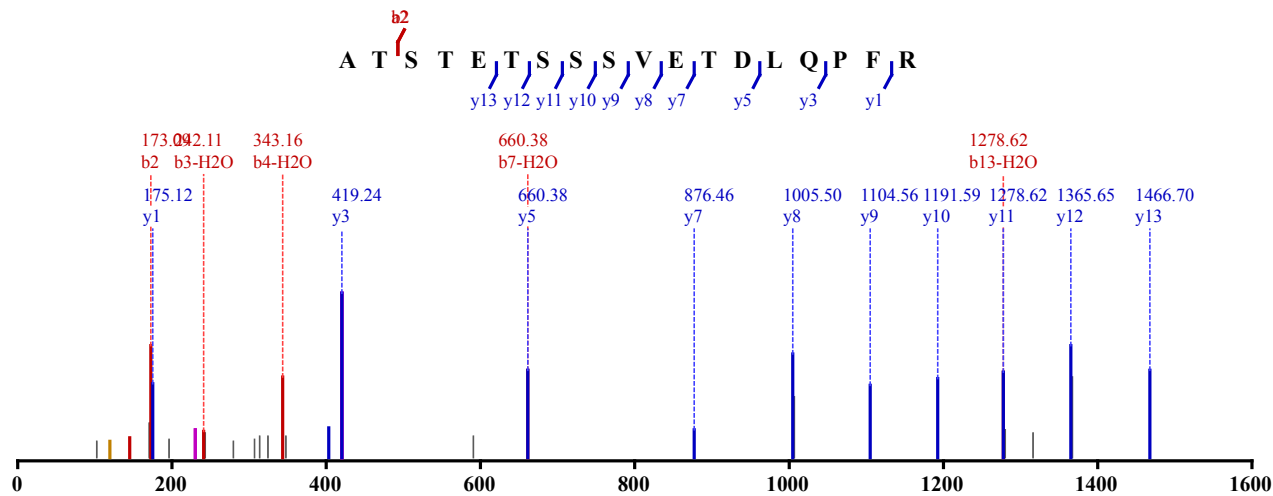

Not Modified  
 Identified in MSS485 with qvalue 0.00  
 Charge: 3, Exp. m/z: 499.926, Calc. m/z: 499.924



Data File: HeLa\_LysC\_pH6\_HCD\_3, Scans: 25415 - 25415

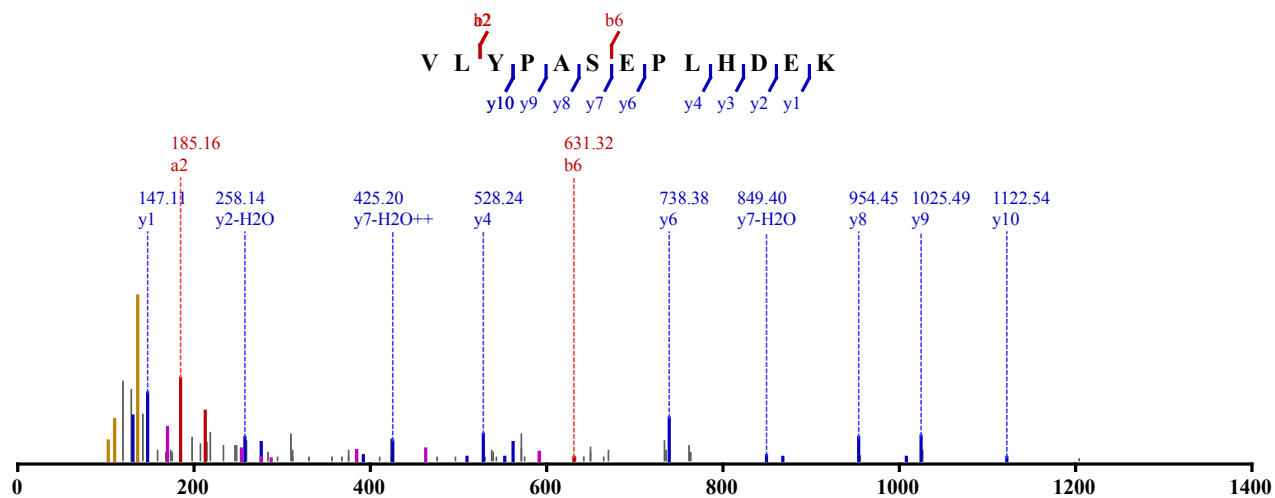

Not Modified

Identified in MSS485 with qvalue 0.00

Charge: 3, Exp. m/z: 499.926, Calc. m/z: 499.924

Data File: HeLa\_LysC\_pH6\_HCD\_2, Scans: 24741 - 24741

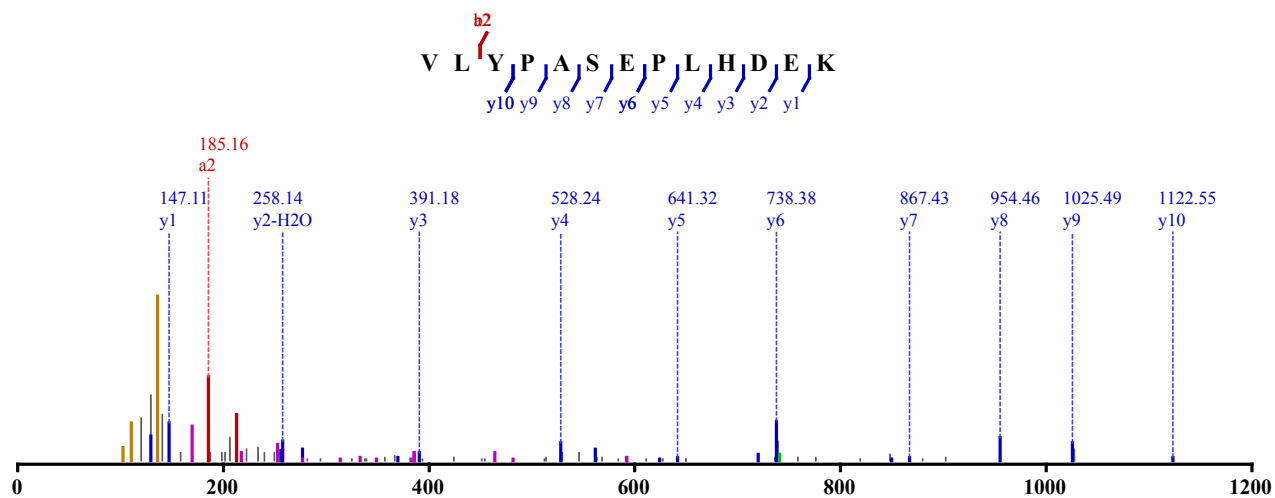

Not Modified

Identified in MSS127 with qvalue 0.00

Charge: 2, Exp. m/z: 715.363, Calc. m/z: 715.362

Data File: HeLa\_chytry\_HCD\_2, Scans: 9367 - 9367

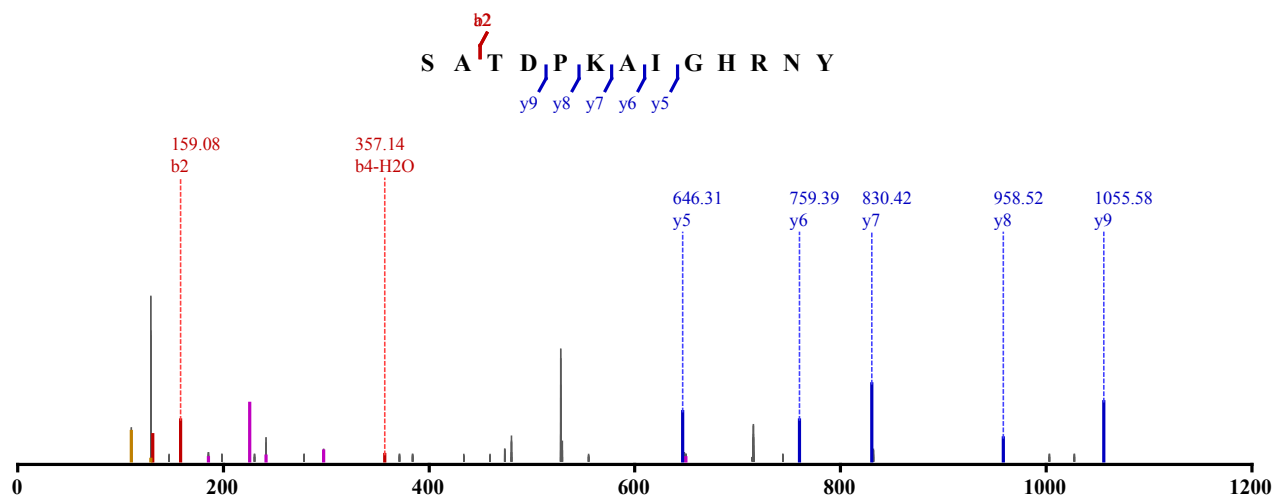

Not Modified

Identified in MSS127 with qvalue 0.00  
 Charge: 3, Exp. m/z: 477.245, Calc. m/z: 477.244  
 Data File: HeLa\_chytry\_HCD\_1, Scans: 5911 - 5911

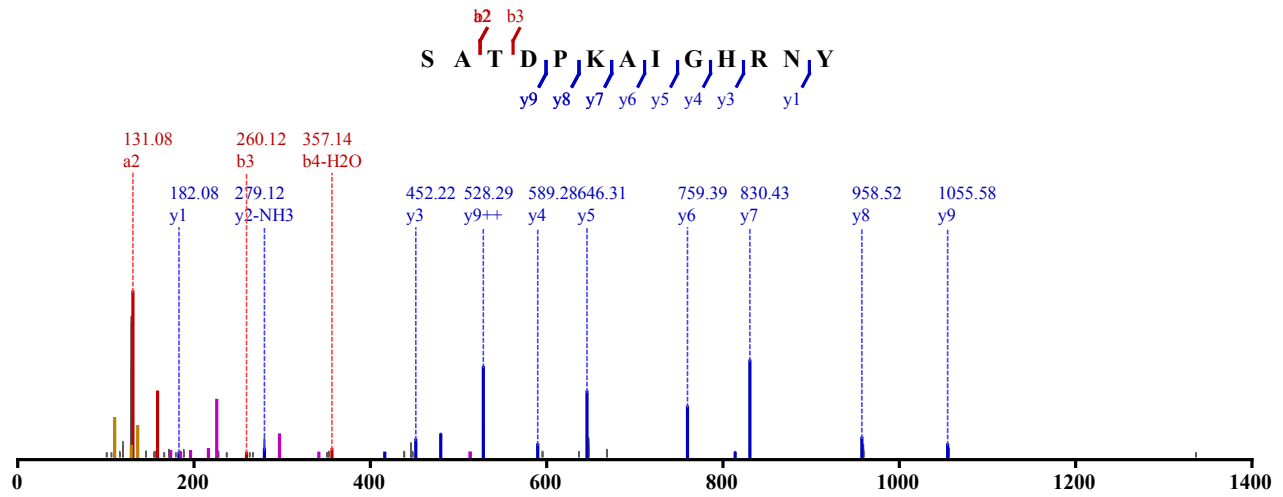

Not Modified  
 Identified in MSS127 with qvalue 0.00  
 Charge: 3, Exp. m/z: 477.245, Calc. m/z: 477.244  
 Data File: HeLa\_chytry\_HCD\_3, Scans: 9319 - 9319

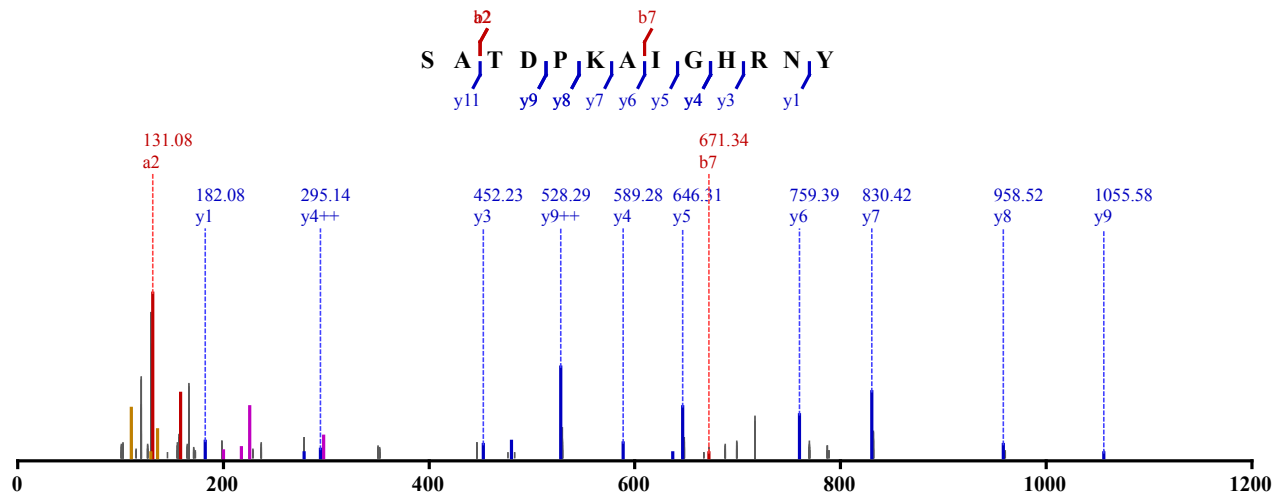

Not Modified  
 Identified in MSS149 with qvalue 0.00  
 Charge: 3, Exp. m/z: 477.244, Calc. m/z: 477.244  
 Data File: HeLa\_Chtry\_CID\_1, Scans: 8352 - 8352

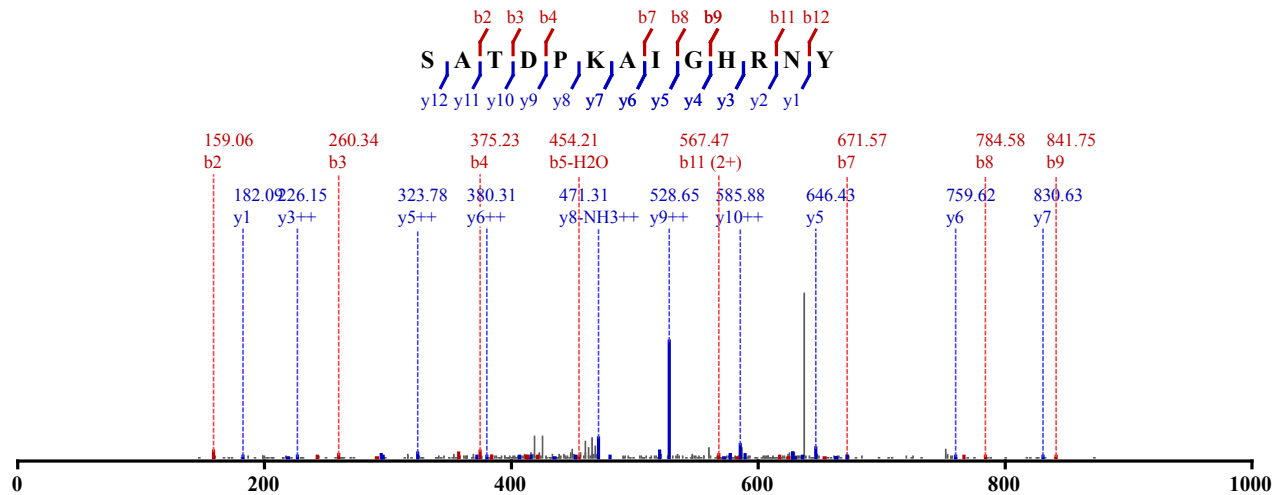

Not Modified

Identified in MSS149 with qvalue 0.00

Charge: 3, Exp. m/z: 477.245, Calc. m/z: 477.244

Data File: HeLa\_Chytry\_CID\_3, Scans: 8558 - 8558

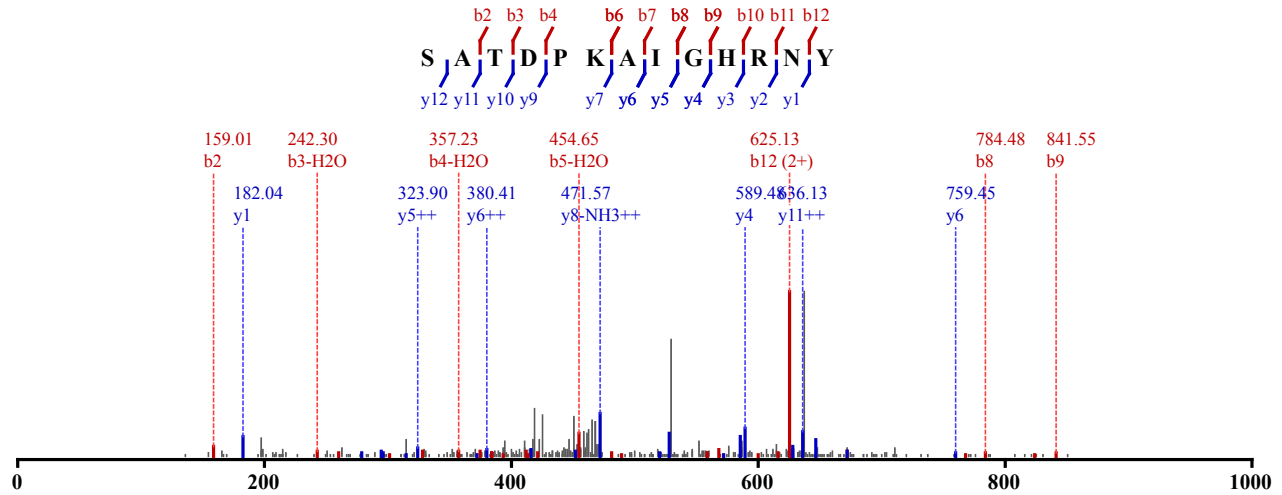

Not Modified

Identified in MSS436 with qvalue 0.00

Charge: 3, Exp. m/z: 477.243, Calc. m/z: 477.244

Data File: HeLa\_Chytry\_CID-ETD\_1, Scans: 6806 - 6806

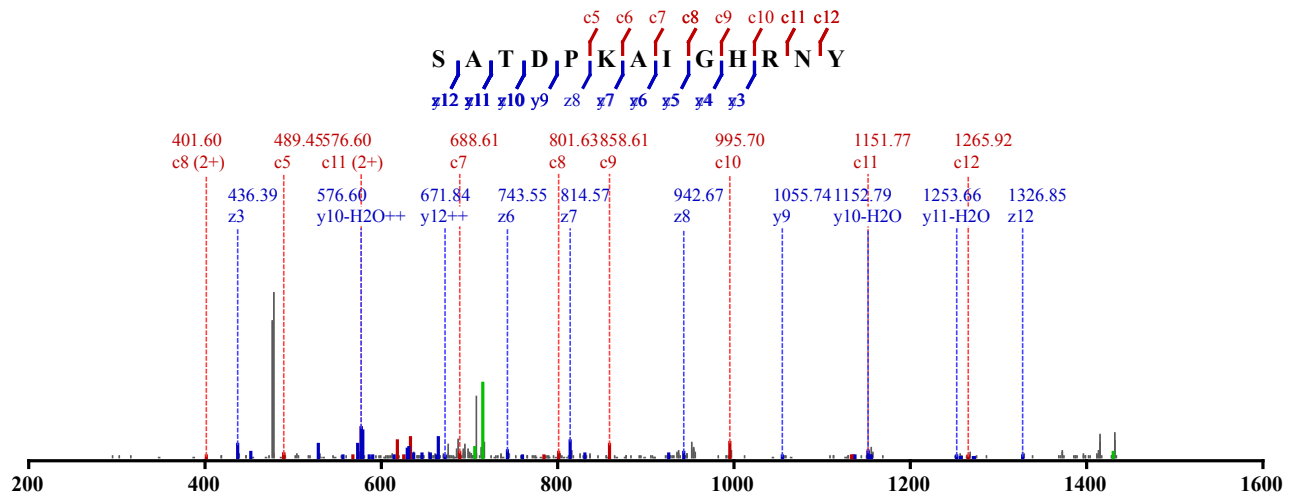

Not Modified

Identified in MSS30 with qvalue 0.00

Charge: 2, Exp. m/z: 934.403, Calc. m/z: 934.407

Data File: 20100611\_Velos1\_TaGe\_SA\_Hela\_6, Scans: 11014 - 11014

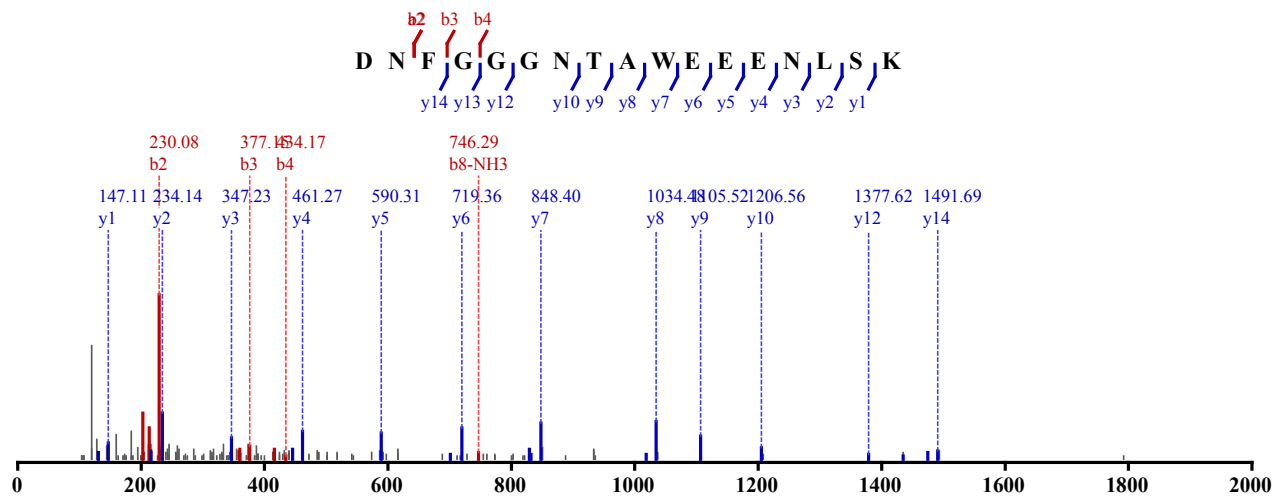

Not Modified  
 Identified in MSS480 with qvalue 0.00  
 Charge: 2, Exp. m/z: 934.411, Calc. m/z: 934.407  
 Data File: HeLa\_try\_pH3\_CID\_3xload, Scans: 22144 - 22144

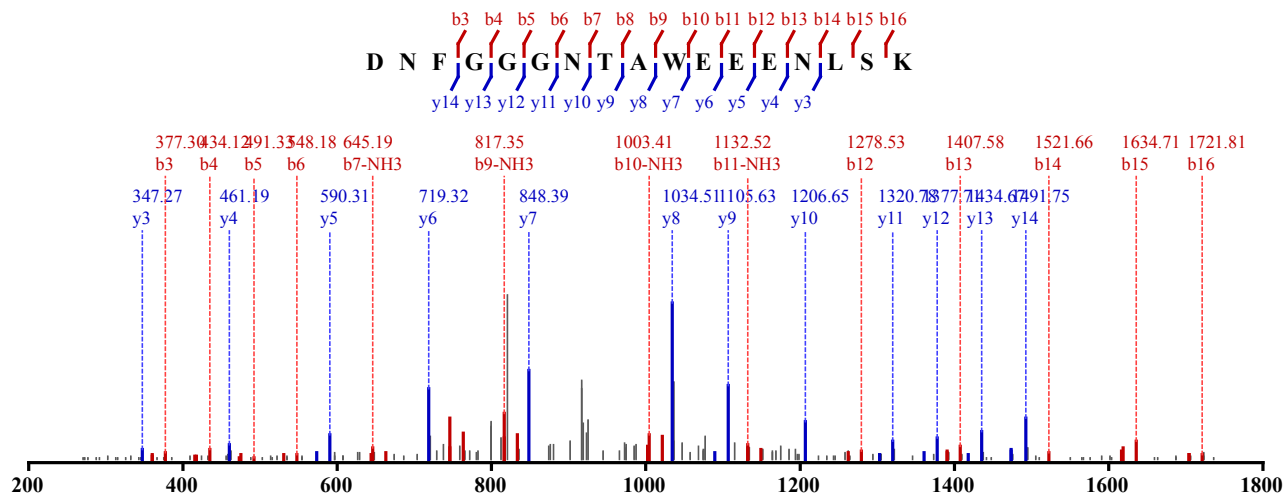

Not Modified  
 Identified in MSS255 with qvalue 0.00  
 Charge: 2, Exp. m/z: 433.715, Calc. m/z: 433.715  
 Data File: HeLa\_ArgC\_CID\_1, Scans: 1352 - 1352

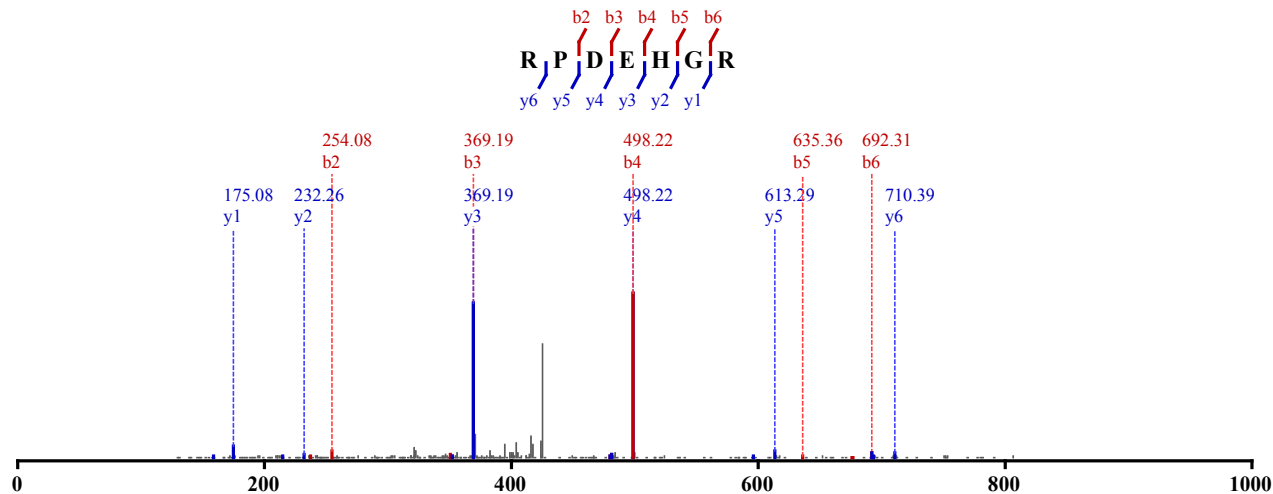

Not Modified  
 Identified in MSS257 with qvalue 0.00  
 Charge: 2, Exp. m/z: 433.715, Calc. m/z: 433.715

Data File: HeLa\_ArgC\_HCD\_1, Scans: 6275 - 6275

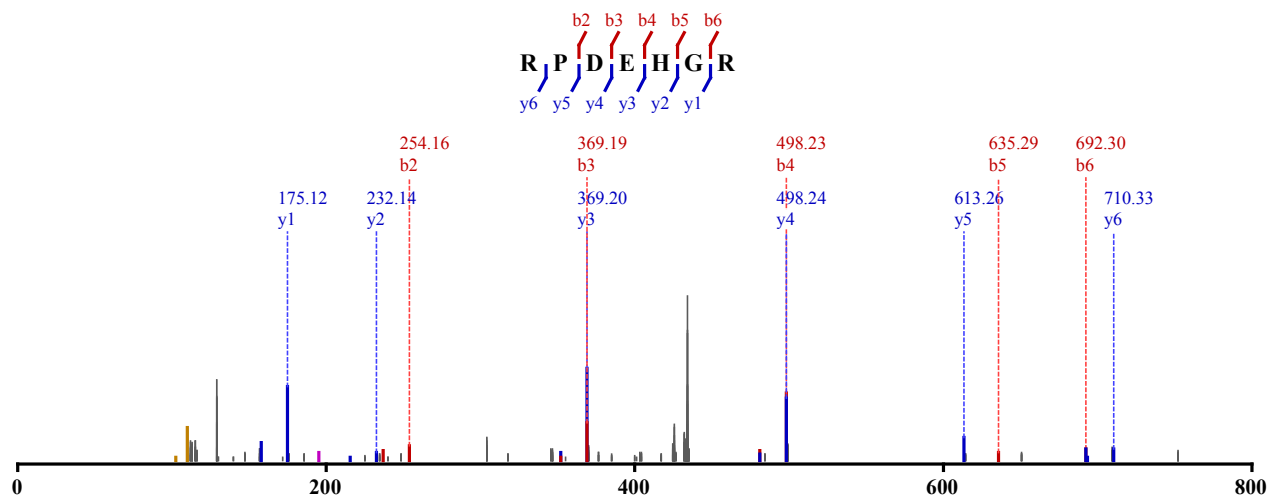

Not Modified

Identified in MSS255 with qvalue 0.00

Charge: 2, Exp. m/z: 433.715, Calc. m/z: 433.715

Data File: HeLa\_ArgC\_CID\_2, Scans: 1302 - 1302

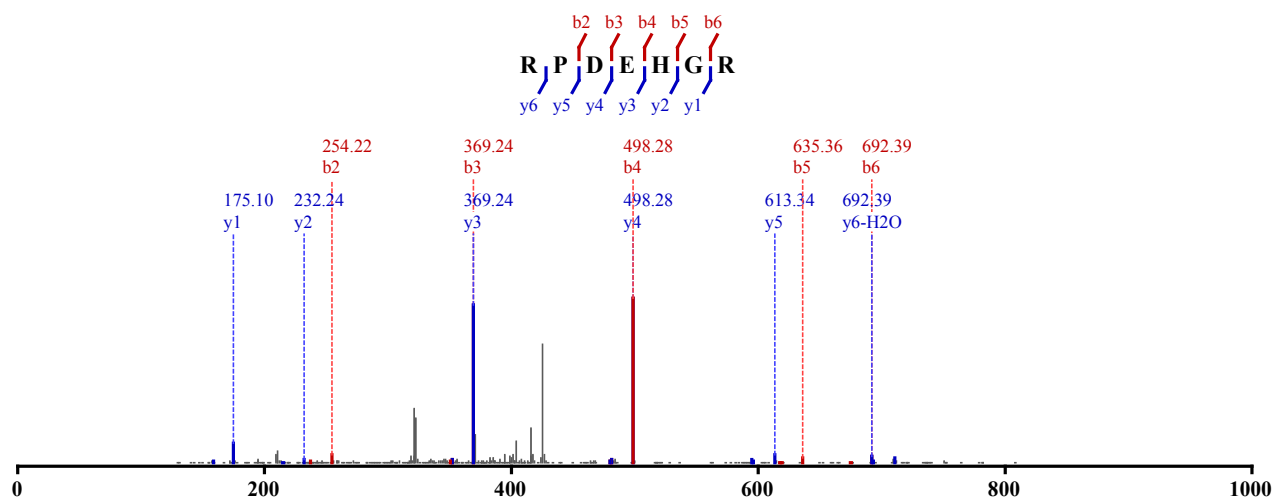

Not Modified

Identified in MSS257 with qvalue 0.00

Charge: 2, Exp. m/z: 433.715, Calc. m/z: 433.715

Data File: HeLa\_ArgC\_HCD\_2, Scans: 6278 - 6278

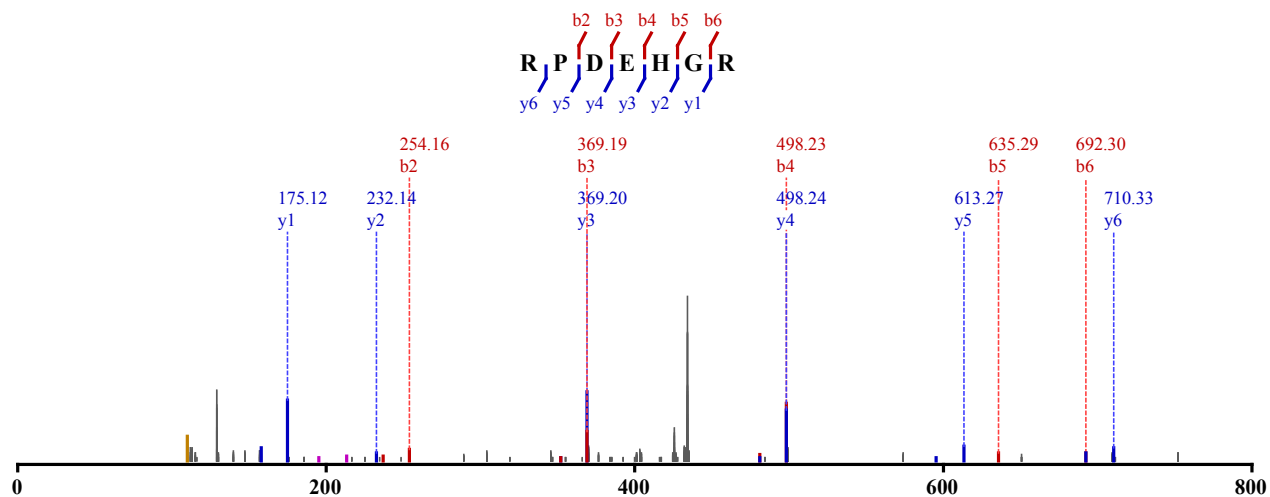

Not Modified

Identified in MSS255 with qvalue 0.00

Charge: 2, Exp. m/z: 433.715, Calc. m/z: 433.715

Data File: HeLa\_ArgC\_CID\_3, Scans: 1107 - 1107

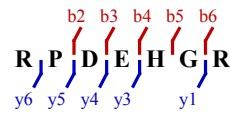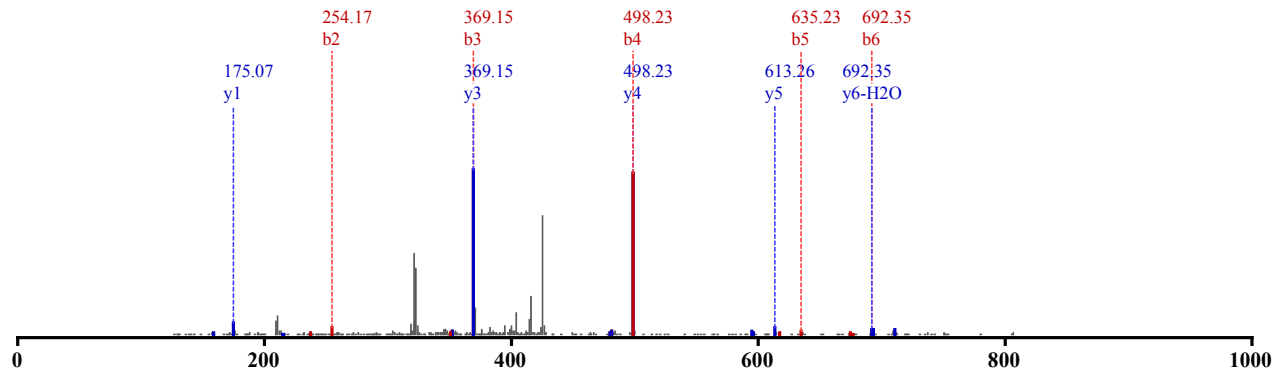

Not Modified

Identified in MSS257 with qvalue 0.00

Charge: 2, Exp. m/z: 433.715, Calc. m/z: 433.715

Data File: HeLa\_ArgC\_HCD\_3, Scans: 7123 - 7123

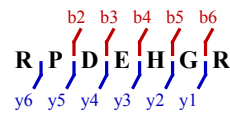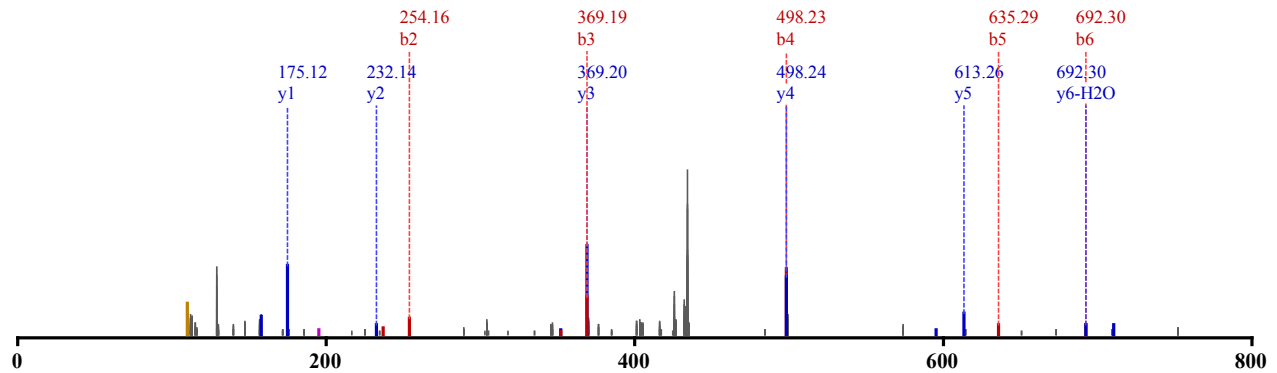

Not Modified

Identified in MSS259 with qvalue 0.00

Charge: 2, Exp. m/z: 433.715, Calc. m/z: 433.715

Data File: HeLa\_ArgC-LysC\_CID\_1, Scans: 1187 - 1187

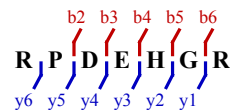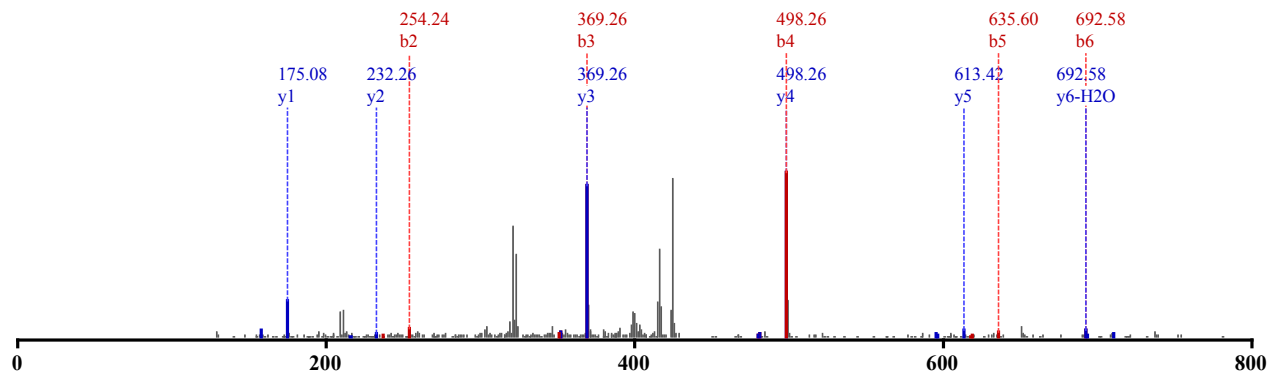

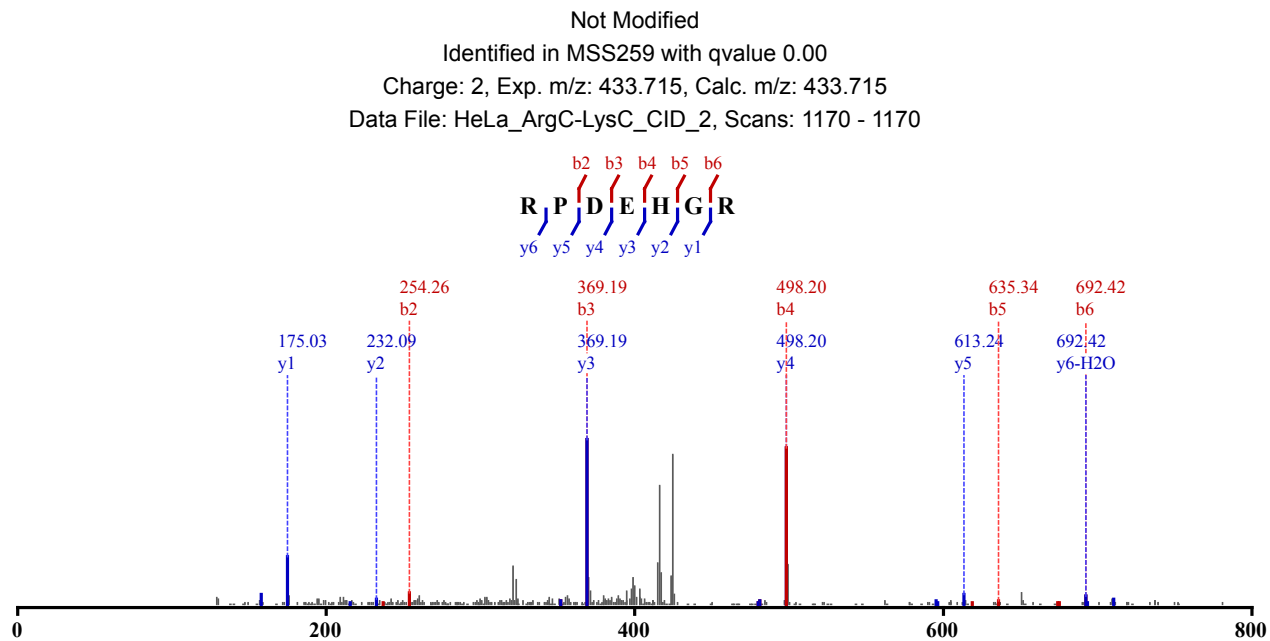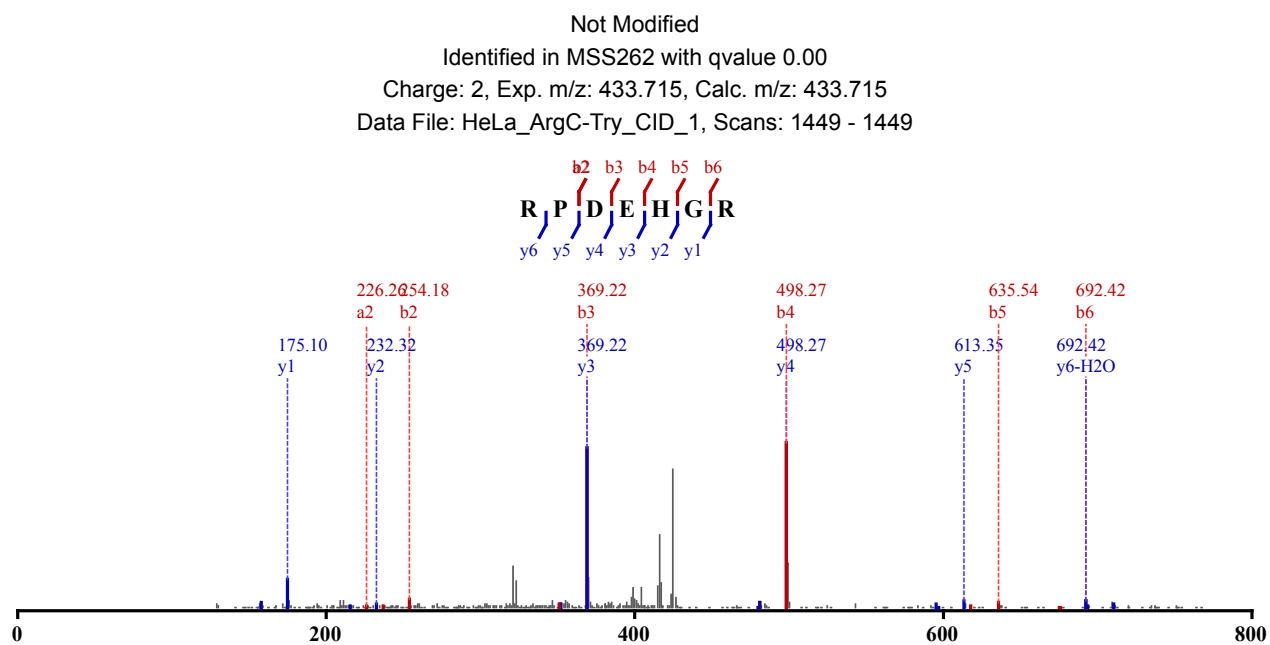

Not Modified  
 Identified in MSS263 with qvalue 0.01  
 Charge: 2, Exp. m/z: 433.715, Calc. m/z: 433.715  
 Data File: HeLa\_ArgC-AspN\_CID\_1, Scans: 1192 - 1192

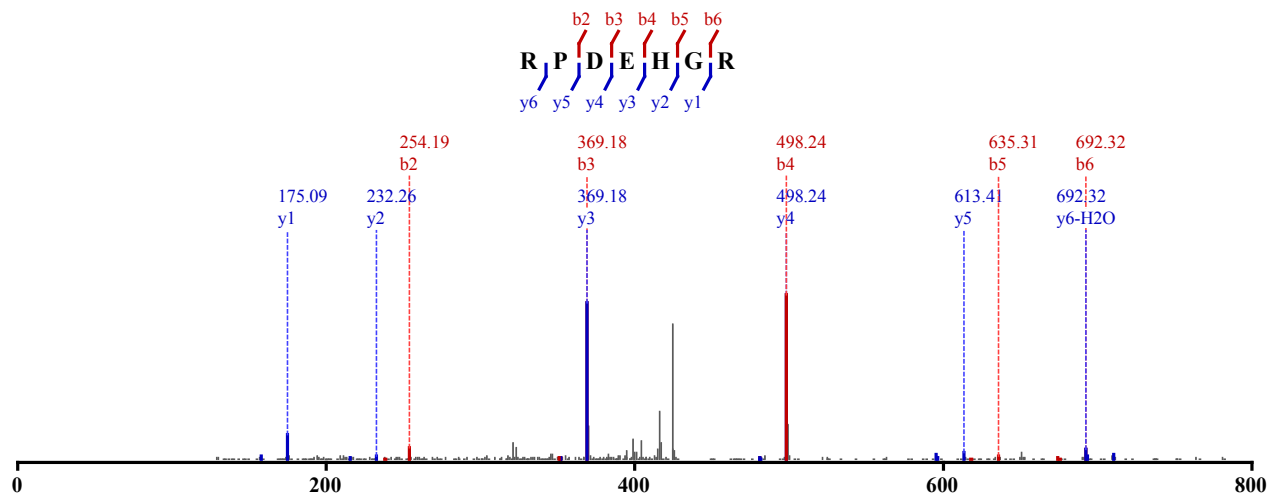

Not Modified  
 Identified in MSS263 with qvalue 0.01  
 Charge: 2, Exp. m/z: 433.715, Calc. m/z: 433.715  
 Data File: HeLa\_ArgC-AspN\_CID\_2, Scans: 988 - 988

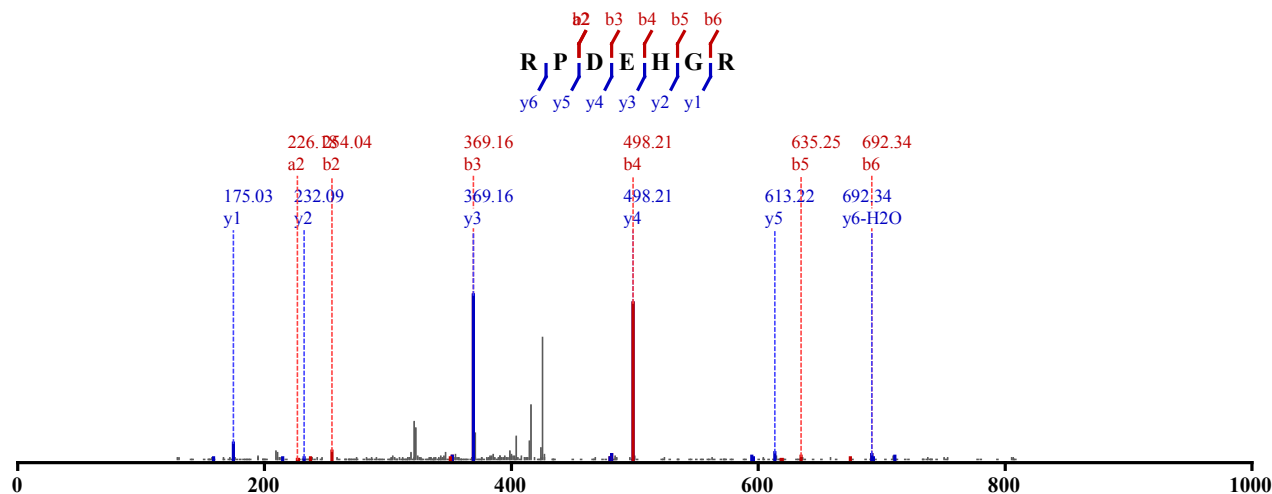

Not Modified  
 Identified in MSS263 with qvalue 0.00  
 Charge: 2, Exp. m/z: 433.715, Calc. m/z: 433.715  
 Data File: HeLa\_ArgC-AspN\_CID\_3, Scans: 1189 - 1189

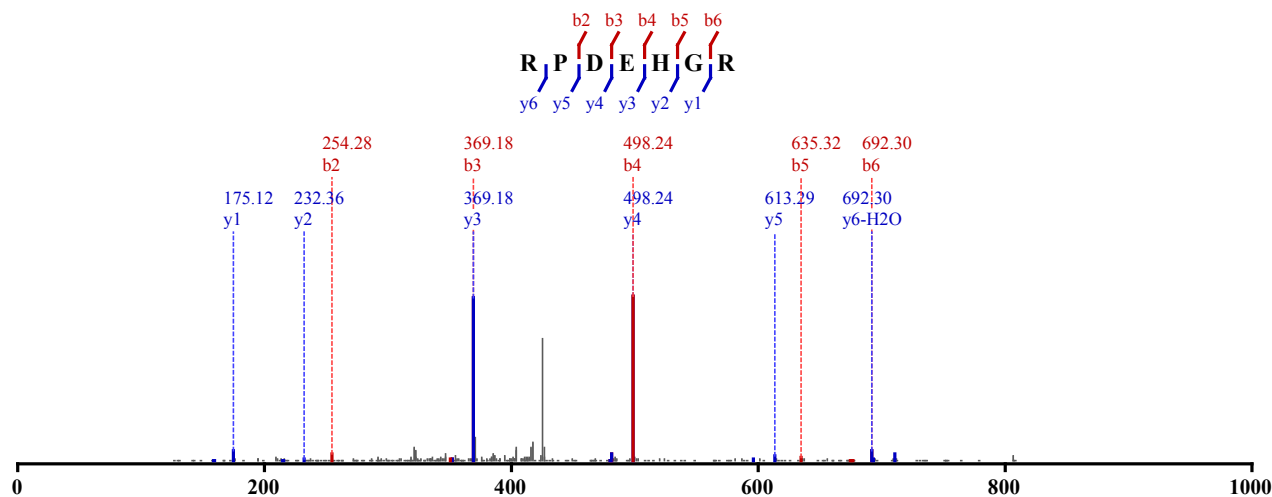

Not Modified  
 Identified in MSS268 with qvalue 0.01  
 Charge: 2, Exp. m/z: 433.715, Calc. m/z: 433.715



Data File: HeLa\_ArgC-GluC\_HCD\_1, Scans: 7157 - 7157

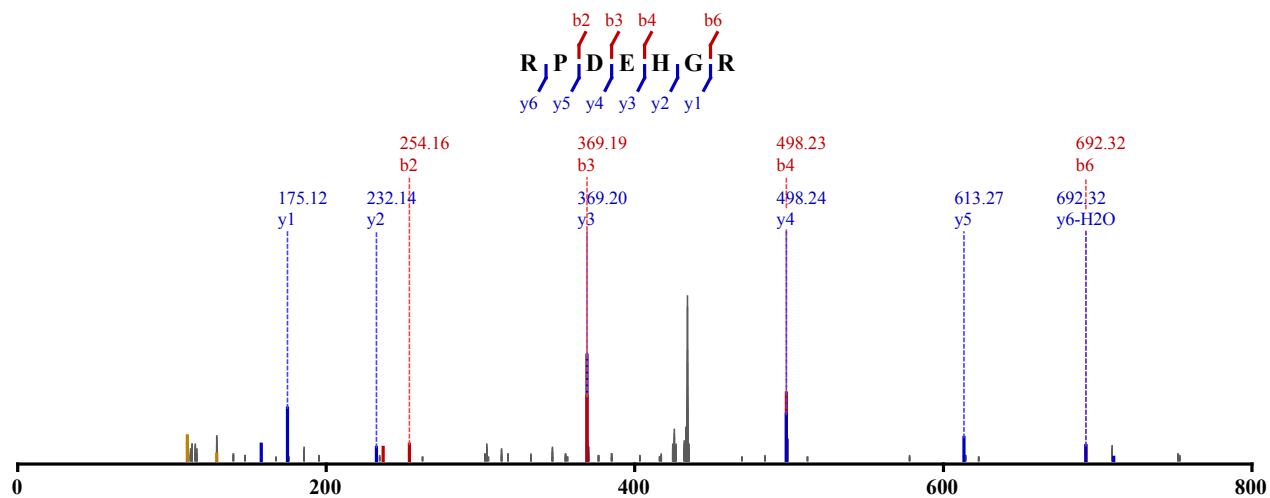

Not Modified

Identified in MSS268 with qvalue 0.00

Charge: 2, Exp. m/z: 433.715, Calc. m/z: 433.715

Data File: HeLa\_ArgC-GluC\_HCD\_2, Scans: 7015 - 7015

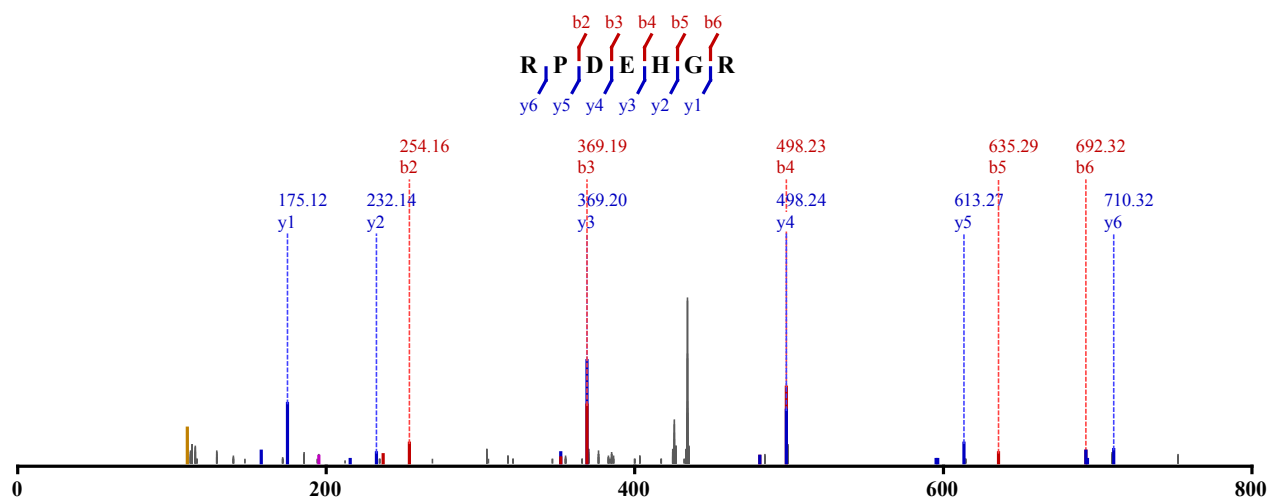

Not Modified

Identified in MSS268 with qvalue 0.00

Charge: 2, Exp. m/z: 433.715, Calc. m/z: 433.715

Data File: HeLa\_ArgC-GluC\_HCD\_3, Scans: 5724 - 5724

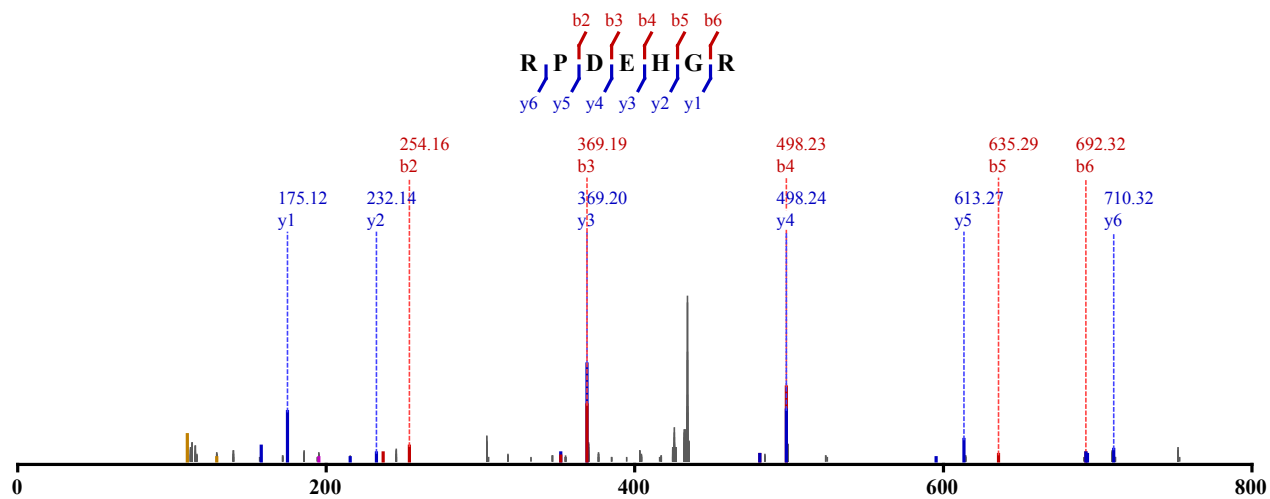

Not Modified

Identified in MSS265 with qvalue 0.00  
 Charge: 2, Exp. m/z: 433.715, Calc. m/z: 433.715  
 Data File: HeLa\_ArgC-GluC\_CID\_2, Scans: 1135 - 1135

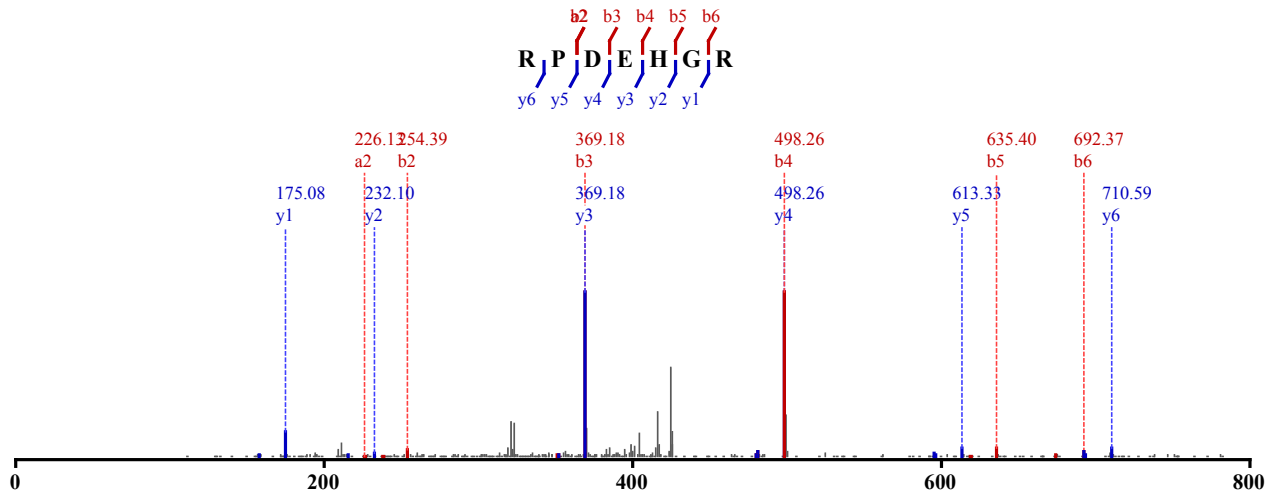

Not Modified  
 Identified in MSS270 with qvalue 0.01  
 Charge: 2, Exp. m/z: 433.715, Calc. m/z: 433.715  
 Data File: HeLa\_ArgC-AspN\_HCD\_1, Scans: 7018 - 7018

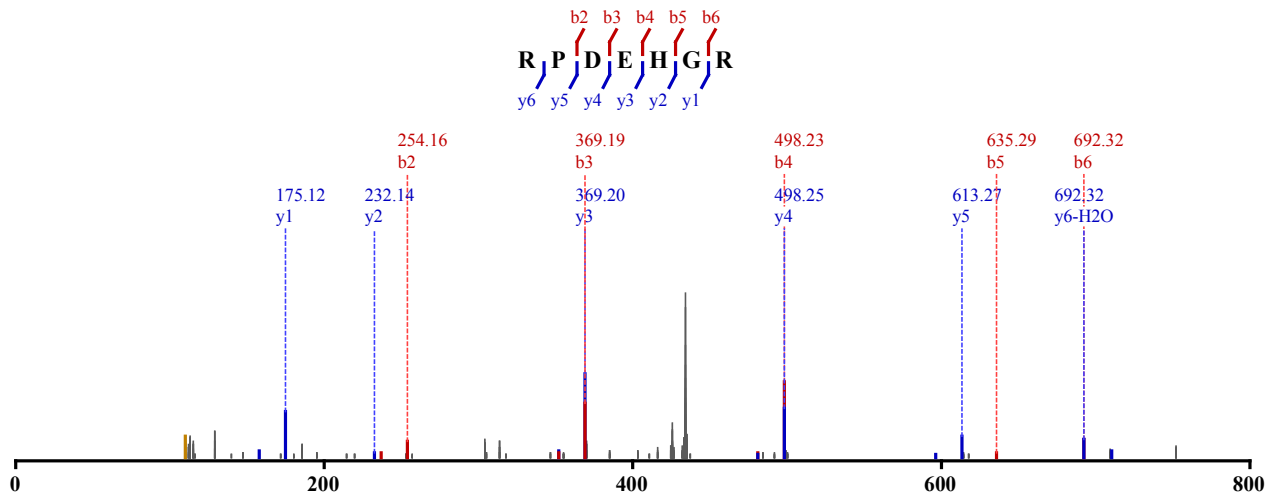

Not Modified  
 Identified in MSS270 with qvalue 0.00  
 Charge: 2, Exp. m/z: 433.715, Calc. m/z: 433.715  
 Data File: HeLa\_ArgC-AspN\_HCD\_2, Scans: 7076 - 7076

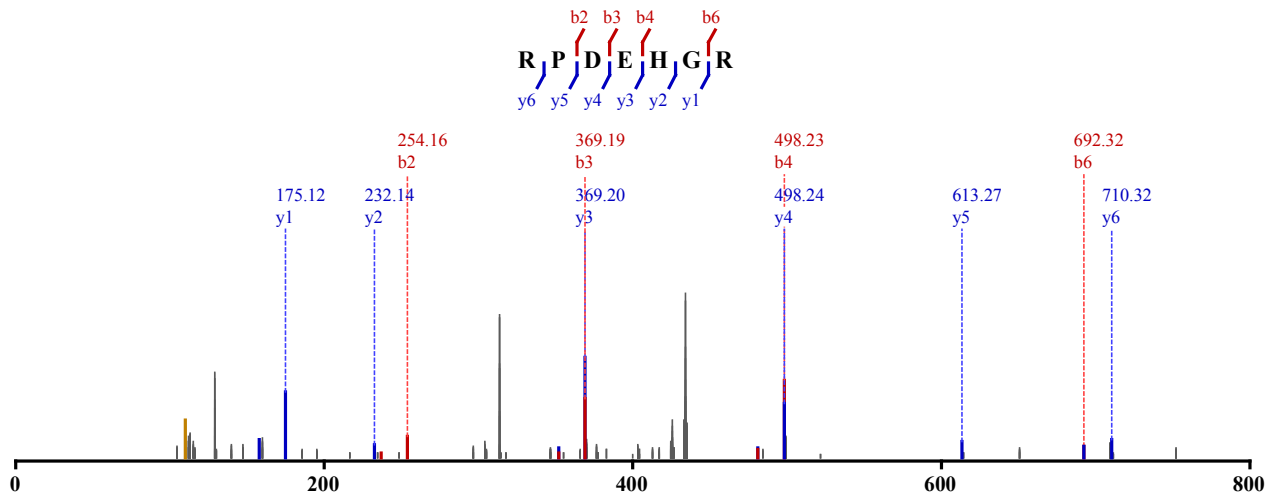

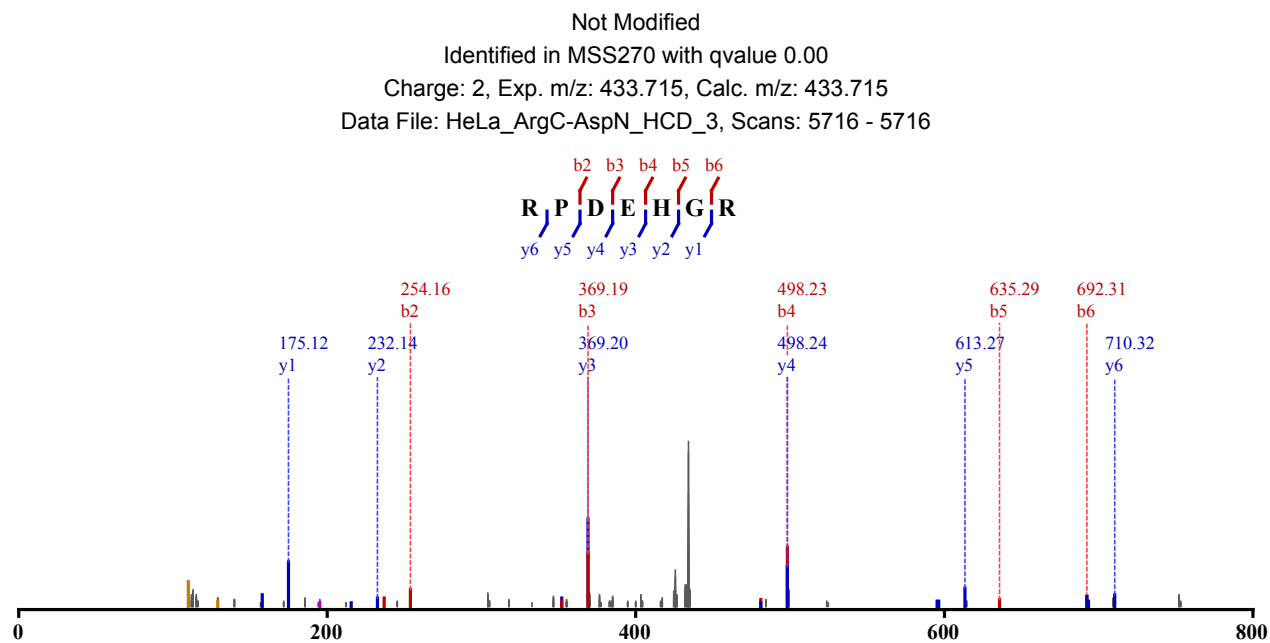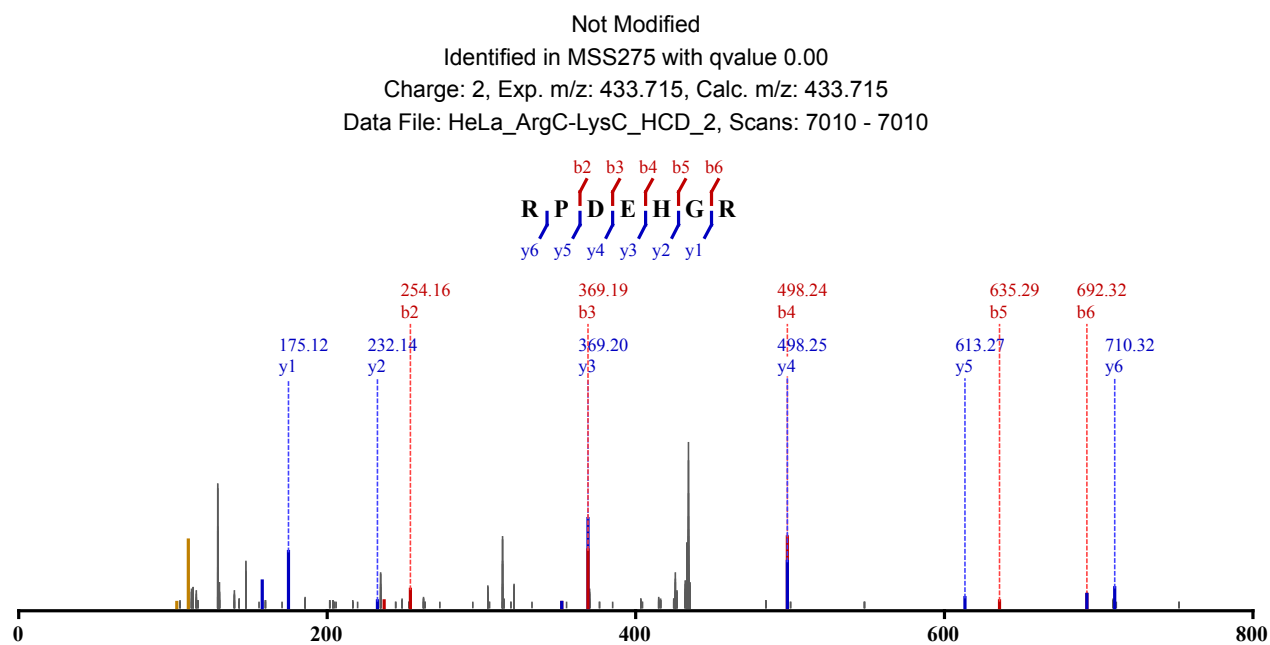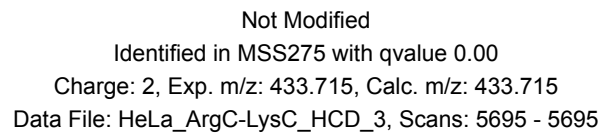

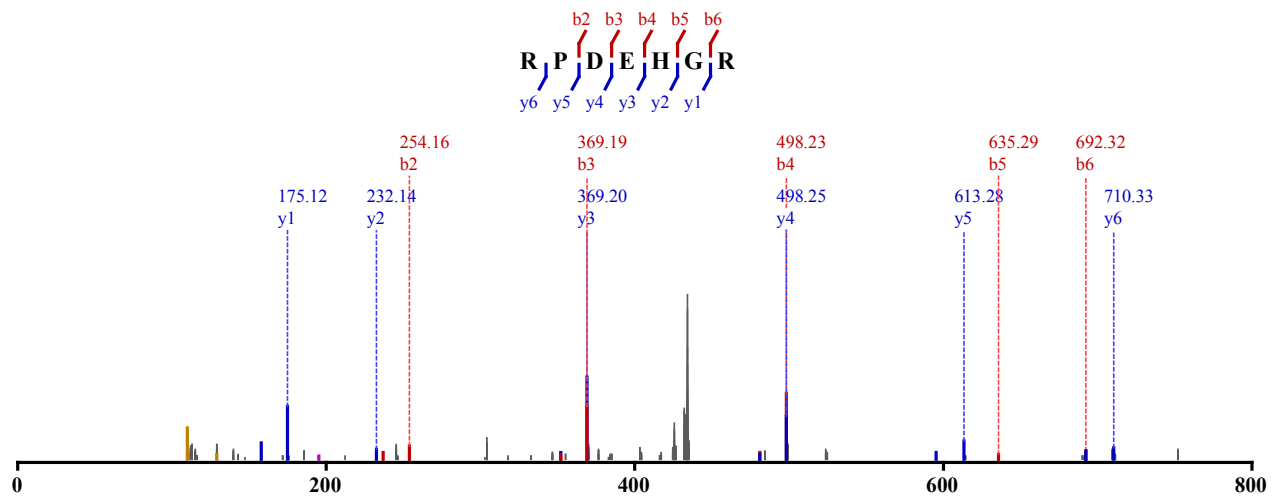

Not Modified

Identified in MSS271 with qvalue 0.00

Charge: 2, Exp. m/z: 433.715, Calc. m/z: 433.715

Data File: HeLa\_ArgC-Chytry\_HCD\_1, Scans: 6993 - 6993

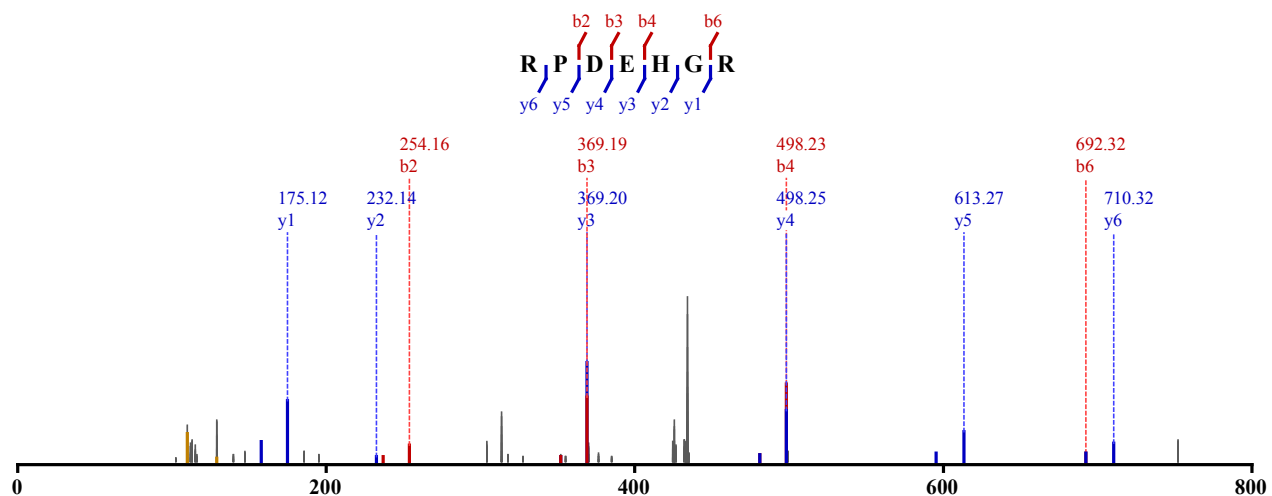

Not Modified

Identified in MSS271 with qvalue 0.00

Charge: 2, Exp. m/z: 433.715, Calc. m/z: 433.715

Data File: HeLa\_ArgC-Chytry\_HCD\_2, Scans: 6959 - 6959

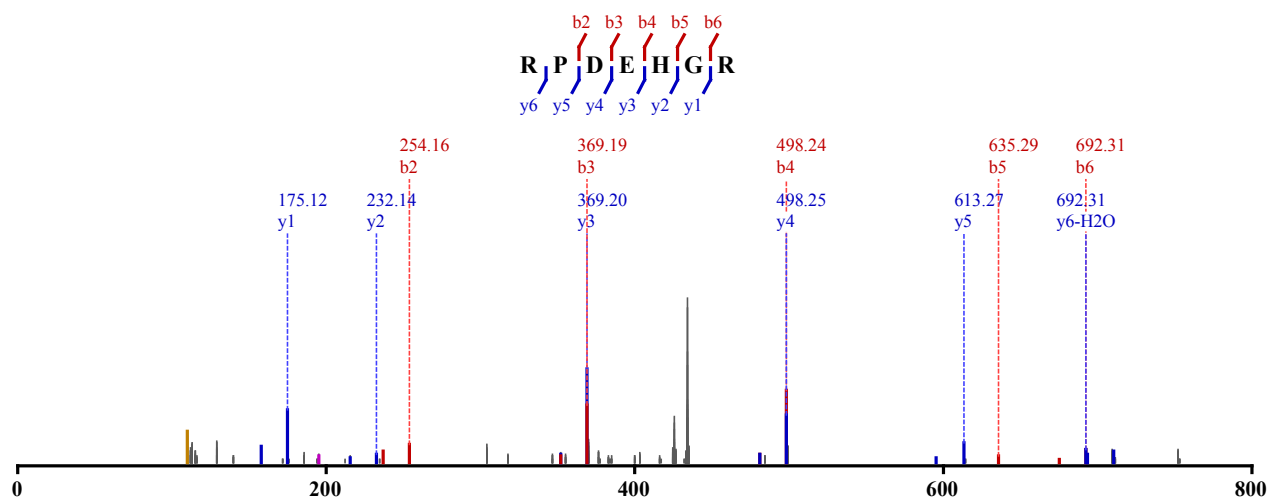

Not Modified

Identified in MSS295 with qvalue 0.00

Charge: 2, Exp. m/z: 433.715, Calc. m/z: 433.715

Data File: HeLa\_ArgC\_CID-ETD\_1, Scans: 1149 - 1149

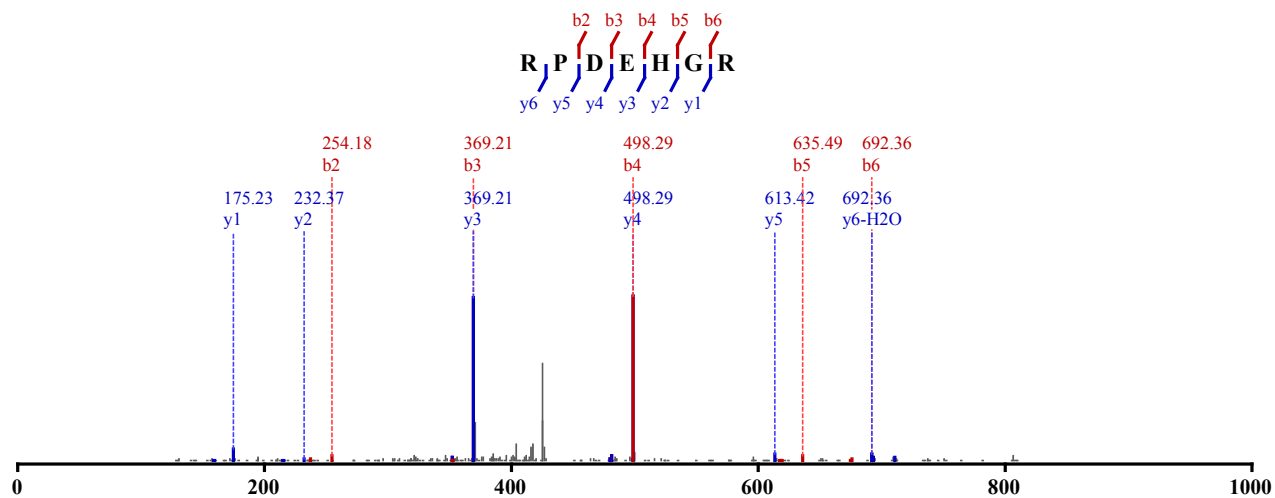

Not Modified

Identified in MSS295 with qvalue 0.00

Charge: 2, Exp. m/z: 433.715, Calc. m/z: 433.715

Data File: HeLa\_ArgC\_CID-ETD\_2, Scans: 1494 - 1494

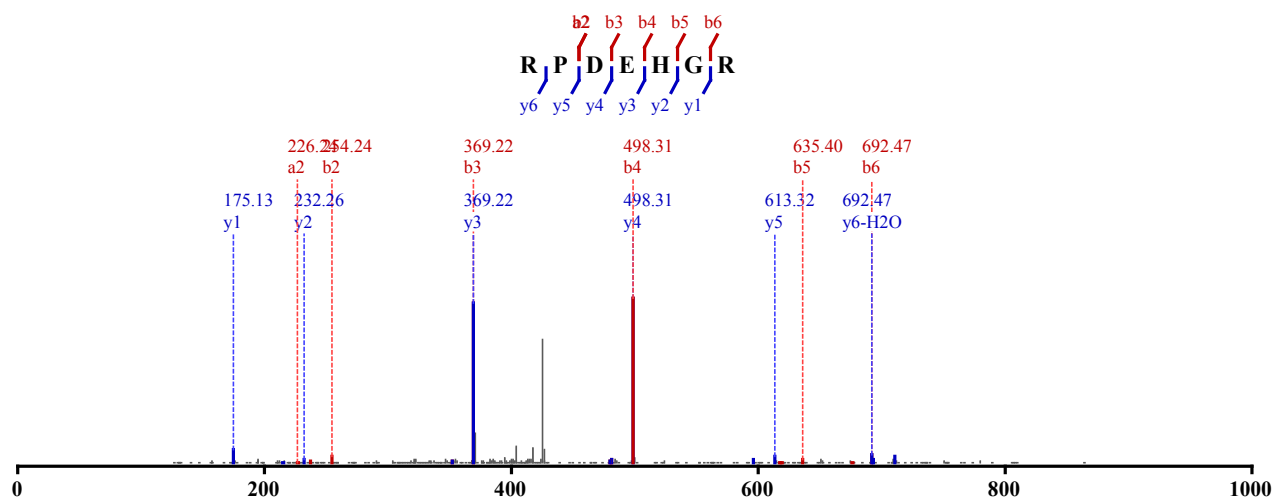

Not Modified

Identified in MSS295 with qvalue 0.00

Charge: 2, Exp. m/z: 433.715, Calc. m/z: 433.715

Data File: HeLa\_ArgC\_CID-ETD\_3, Scans: 1502 - 1502

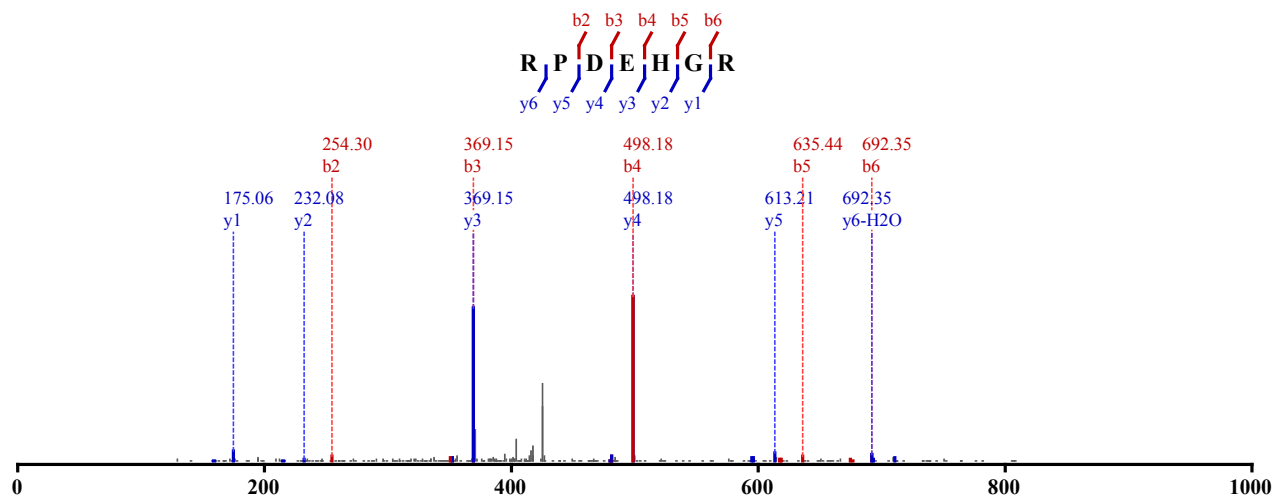

Not Modified

Identified in MSS291 with qvalue 0.00  
 Charge: 2, Exp. m/z: 433.715, Calc. m/z: 433.715  
 Data File: HeLa\_ArgC-Elastase\_CID\_1, Scans: 1275 - 1275

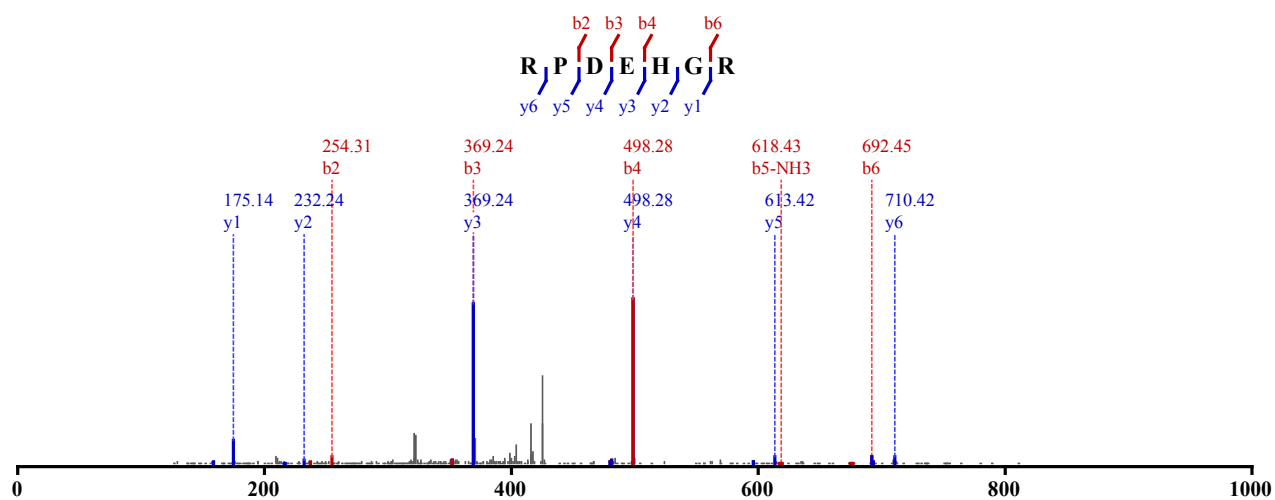

Not Modified  
 Identified in MSS291 with qvalue 0.00  
 Charge: 2, Exp. m/z: 433.715, Calc. m/z: 433.715  
 Data File: HeLa\_ArgC-Elastase\_CID\_2, Scans: 1061 - 1061

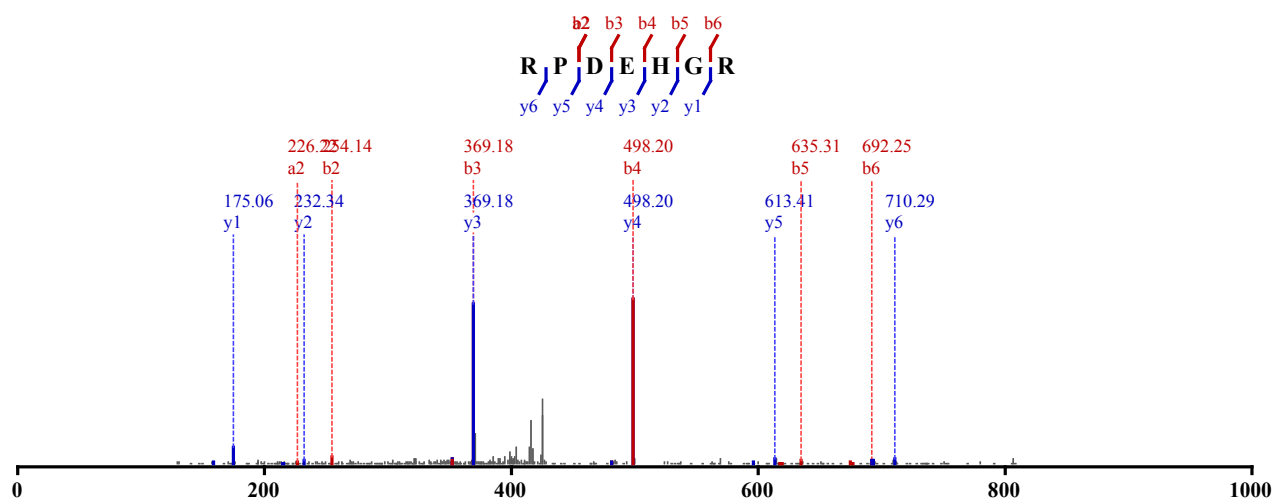

Not Modified  
 Identified in MSS301 with qvalue 0.00  
 Charge: 2, Exp. m/z: 433.715, Calc. m/z: 433.715  
 Data File: HeLa\_ArgC-Try\_HCD\_1, Scans: 7400 - 7400

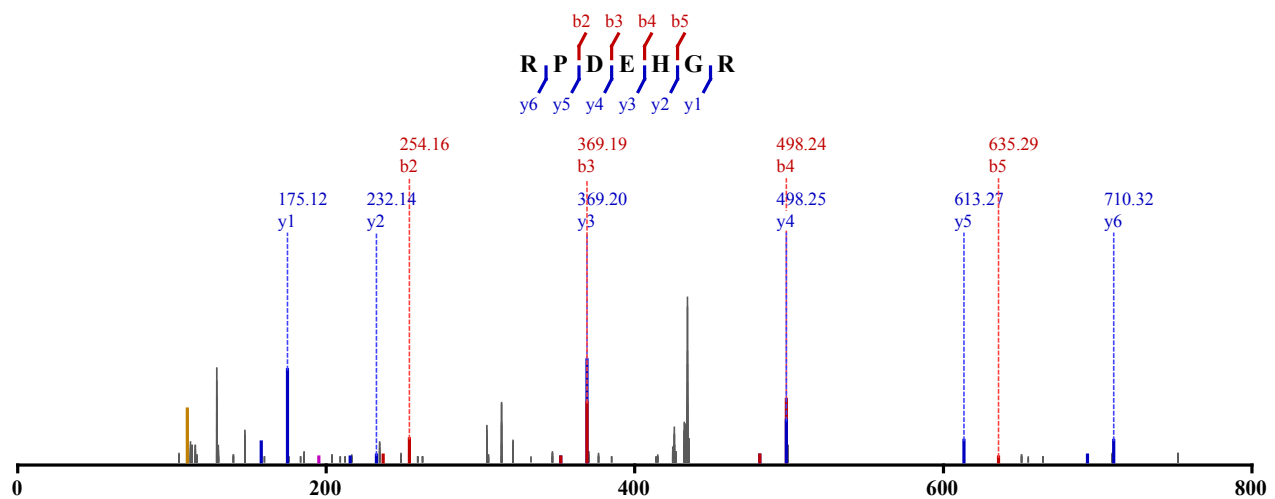

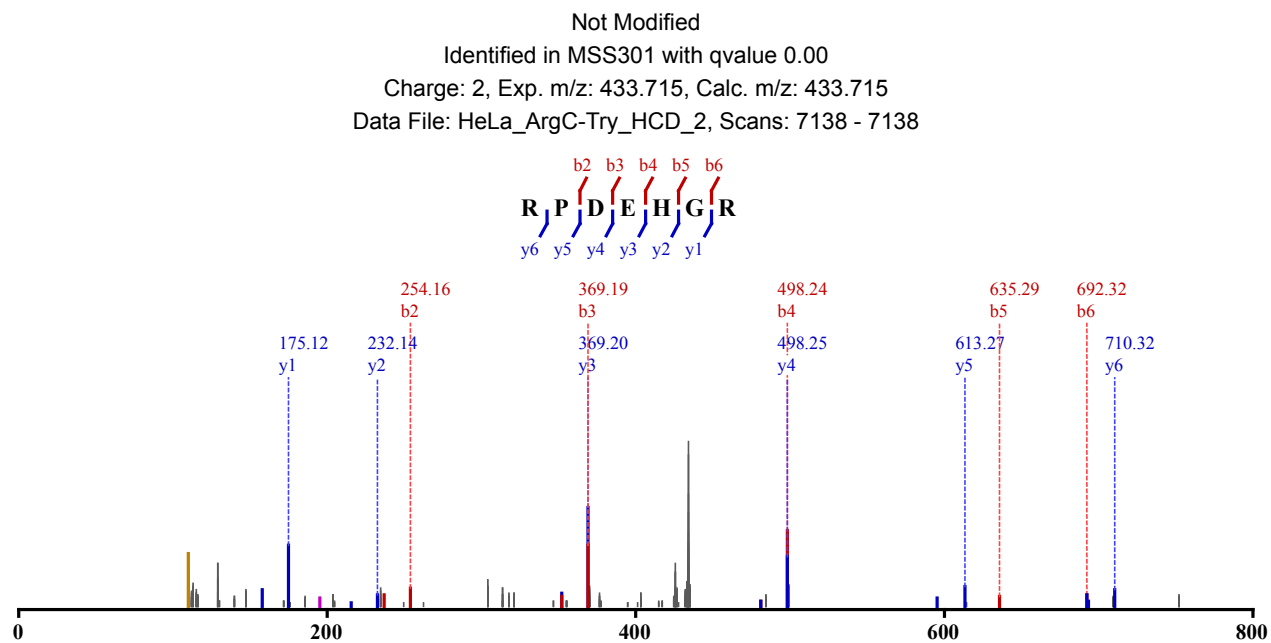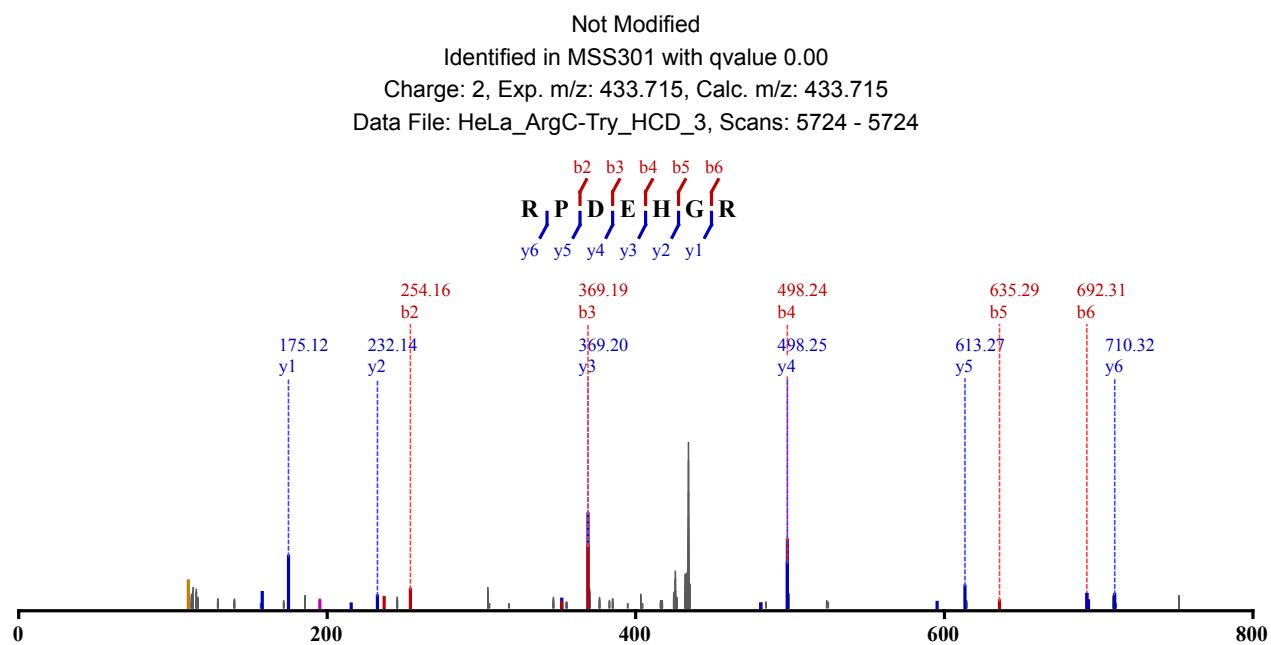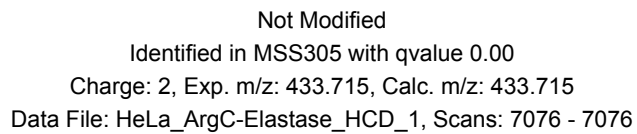

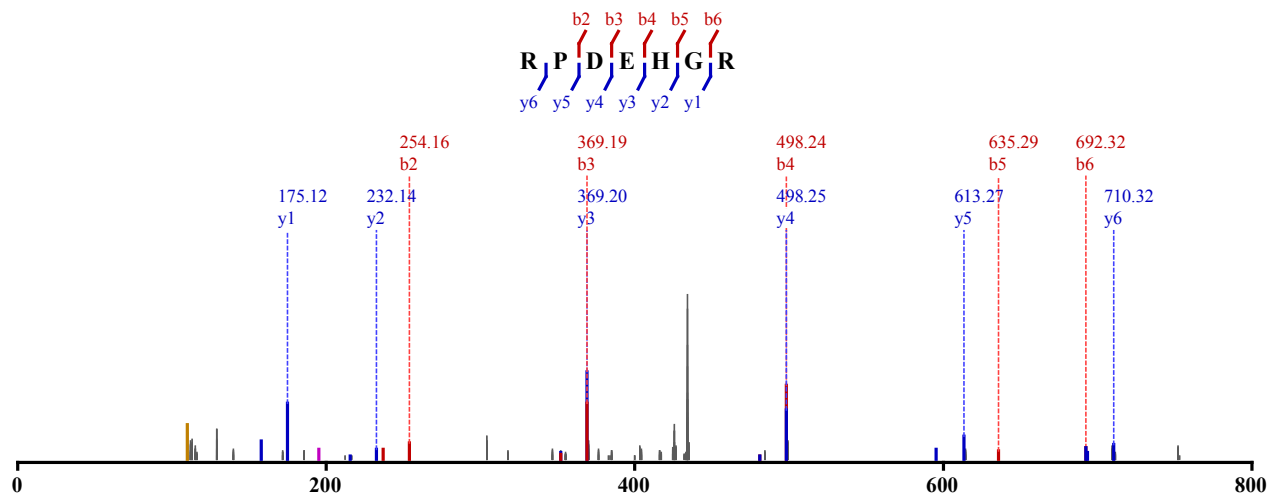

Not Modified

Identified in MSS305 with qvalue 0.00

Charge: 2, Exp. m/z: 433.715, Calc. m/z: 433.715

Data File: HeLa\_ArgC-Elastase\_HCD\_2, Scans: 7044 - 7044

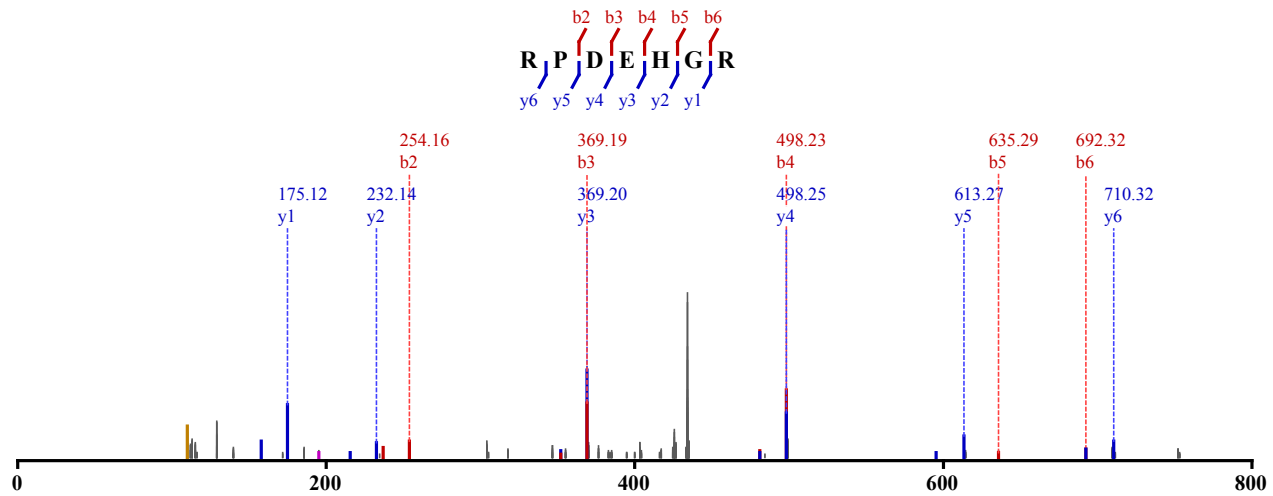

Not Modified

Identified in MSS305 with qvalue 0.00

Charge: 2, Exp. m/z: 433.715, Calc. m/z: 433.715

Data File: HeLa\_ArgC-Elastase\_HCD\_3, Scans: 5782 - 5782

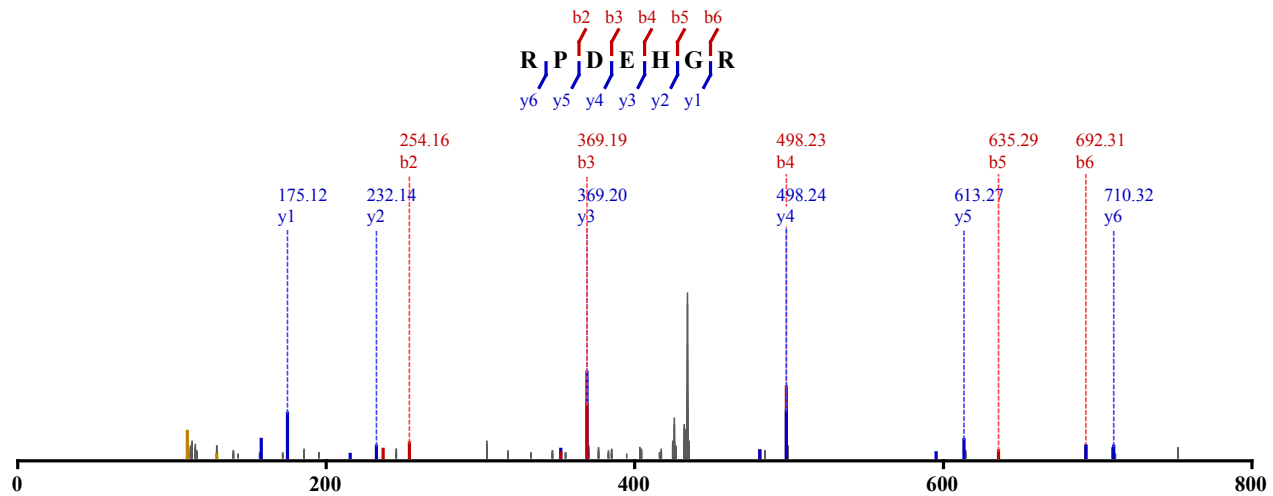

Not Modified

Identified in MSS420 with qvalue 0.00

Charge: 2, Exp. m/z: 433.715, Calc. m/z: 433.715



Data File: HeLa\_ArgC-Try\_CID-ETD\_1, Scans: 1495 - 1495

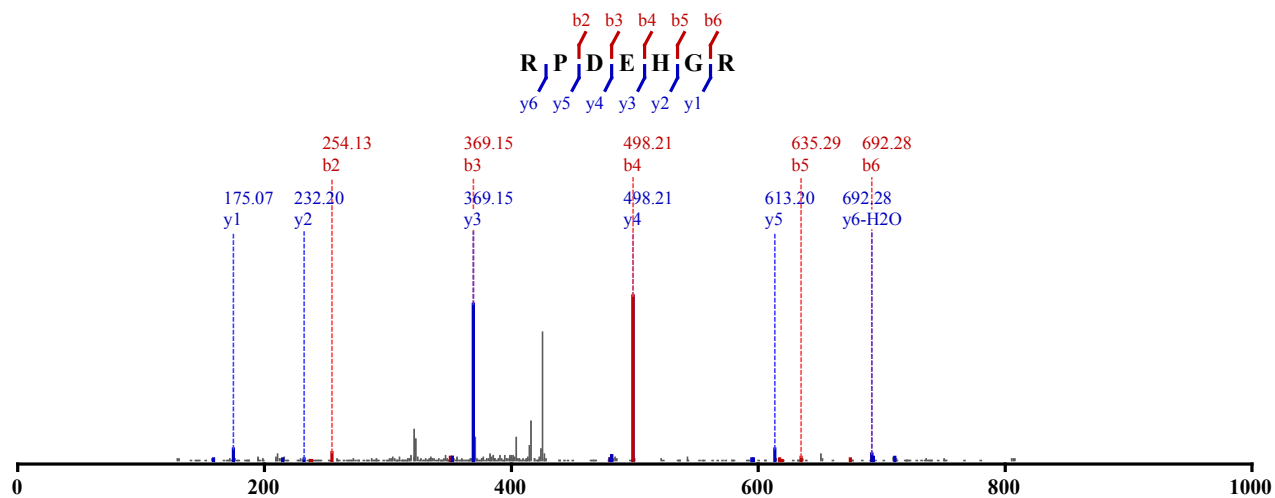

Not Modified

Identified in MSS418 with qvalue 0.01

Charge: 2, Exp. m/z: 433.715, Calc. m/z: 433.715

Data File: HeLa\_ArgC-GluC\_CID-ETD\_1, Scans: 1346 - 1346

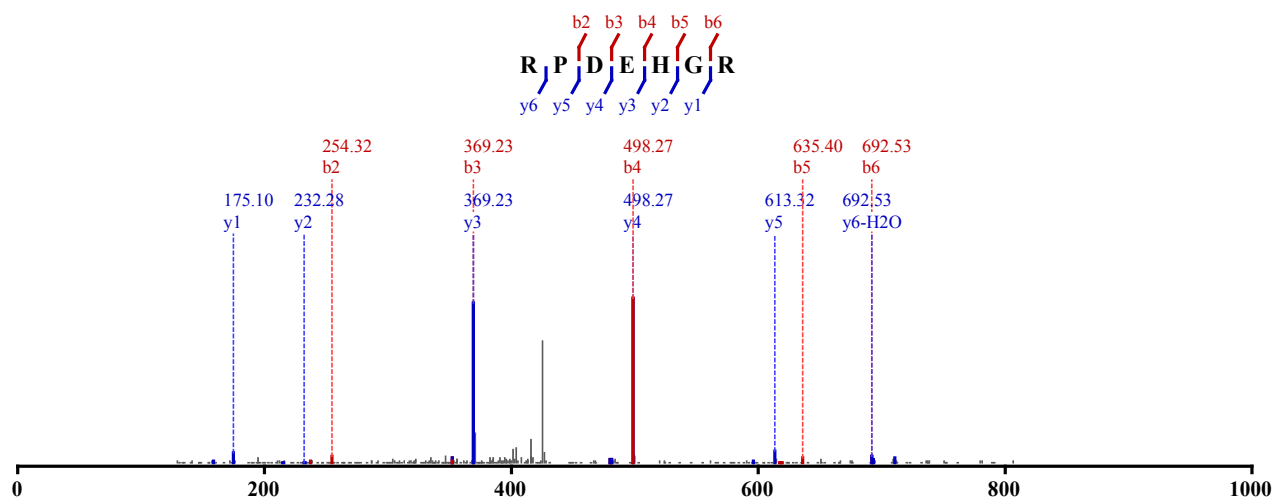

Not Modified

Identified in MSS416 with qvalue 0.01

Charge: 2, Exp. m/z: 433.715, Calc. m/z: 433.715

Data File: HeLa\_ArgC-Chytry\_CID-ETD\_1, Scans: 1352 - 1352

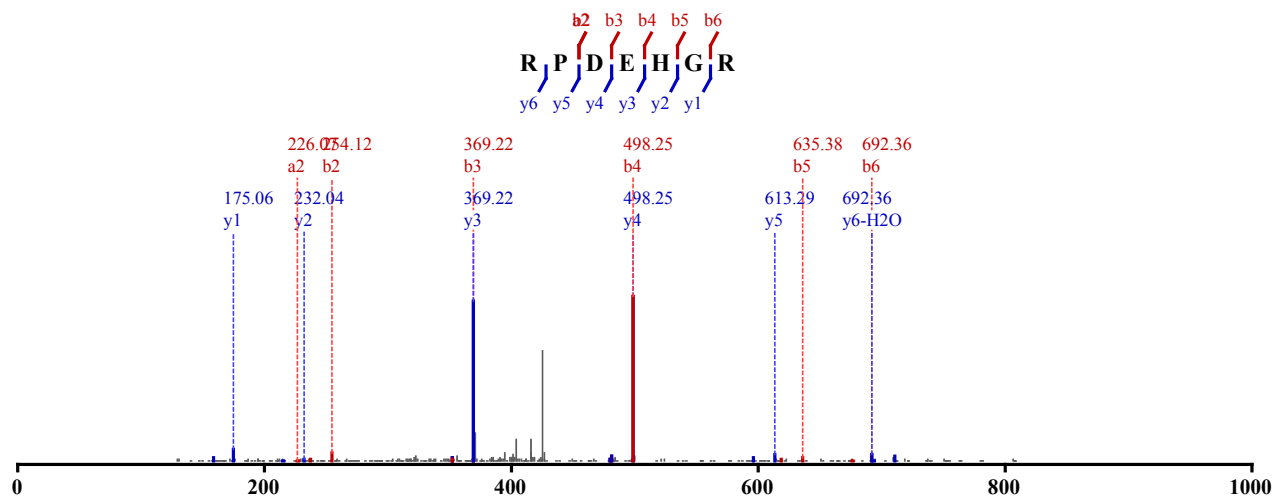

Not Modified

Identified in MSS417 with qvalue 0.00  
 Charge: 2, Exp. m/z: 433.715, Calc. m/z: 433.715  
 Data File: HeLa\_ArgC-Elastase\_CID-ETD\_1, Scans: 1455 - 1455

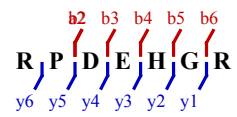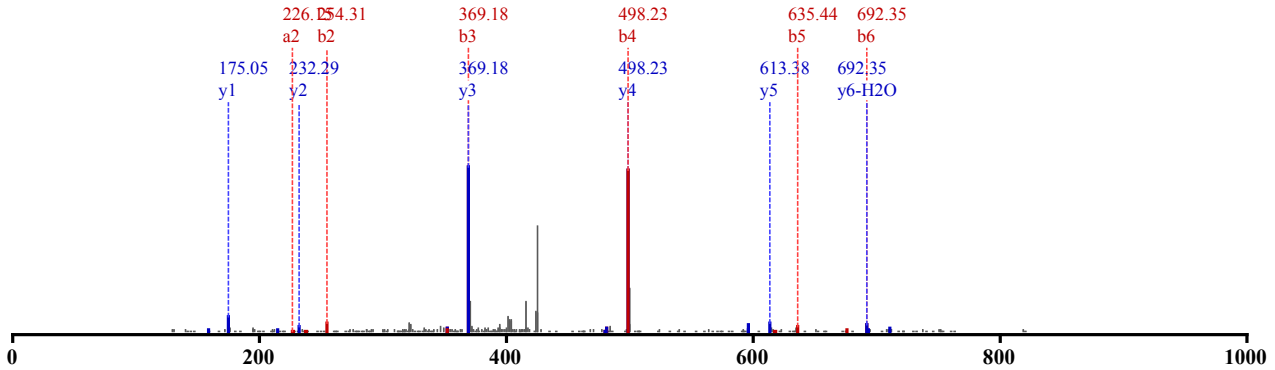

Not Modified  
 Identified in MSS480 with qvalue 0.01  
 Charge: 2, Exp. m/z: 433.728, Calc. m/z: 433.715  
 Data File: HeLa\_try\_pH4\_CID\_3xload\_2, Scans: 4761 - 4761

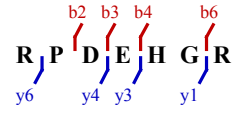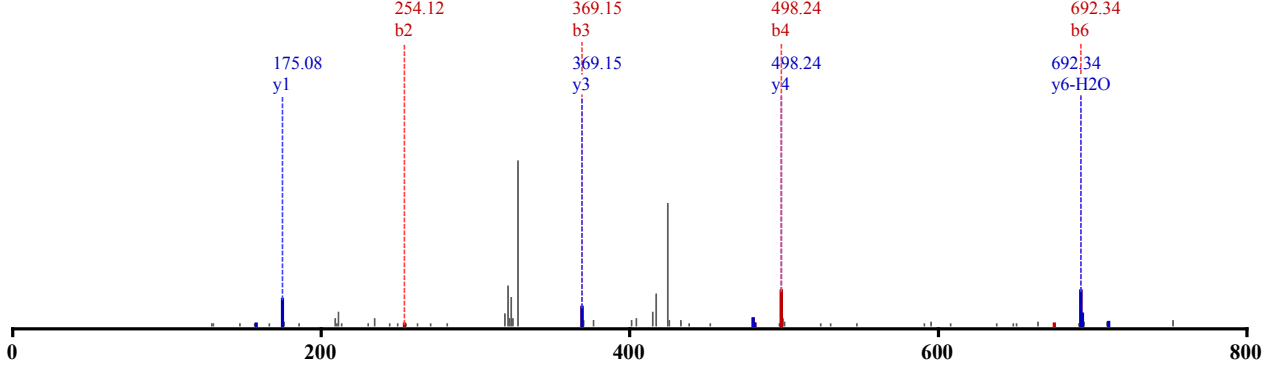

Not Modified  
 Identified in MSS480 with qvalue 0.01  
 Charge: 2, Exp. m/z: 433.728, Calc. m/z: 433.715  
 Data File: HeLa\_try\_pH4\_CID\_3xload\_2, Scans: 4809 - 4809

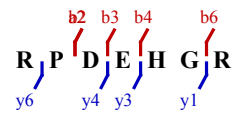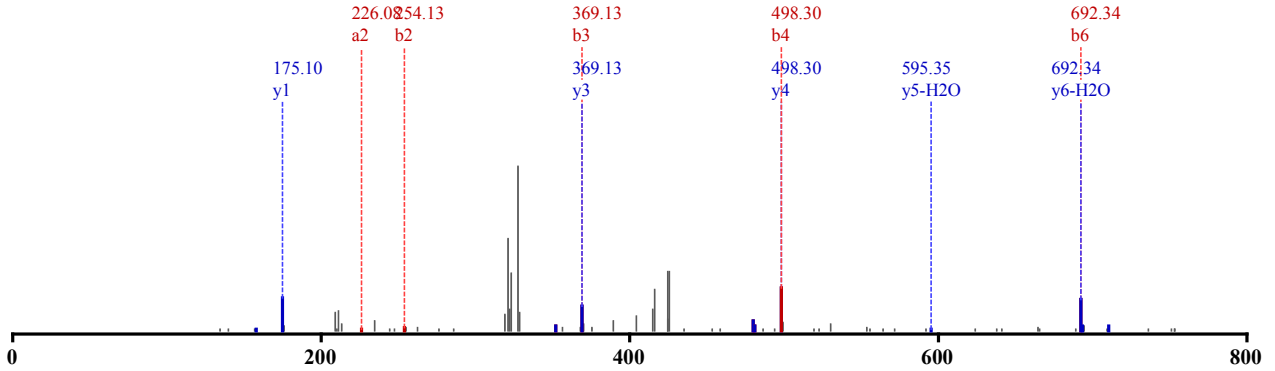

Not Modified

Identified in MSS487 with qvalue 0.00

Charge: 2, Exp. m/z: 433.715, Calc. m/z: 433.715

Data File: HeLa\_ArgC-Try\_pH11\_HCD\_1, Scans: 3415 - 3415

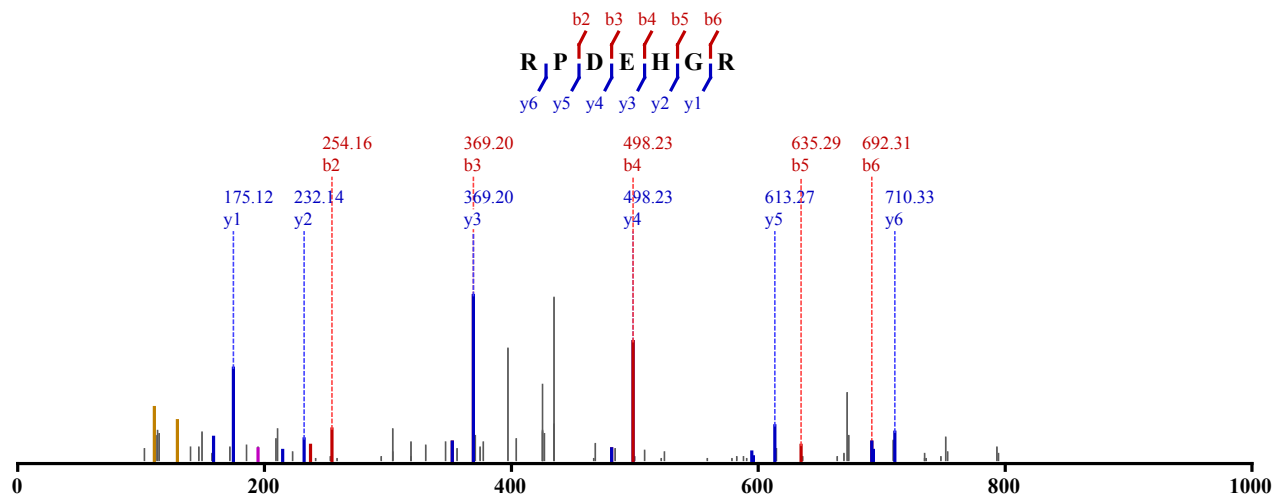

Not Modified

Identified in MSS487 with qvalue 0.00

Charge: 2, Exp. m/z: 433.715, Calc. m/z: 433.715

Data File: HeLa\_ArgC-Try\_pH11\_HCD\_2, Scans: 4959 - 4959

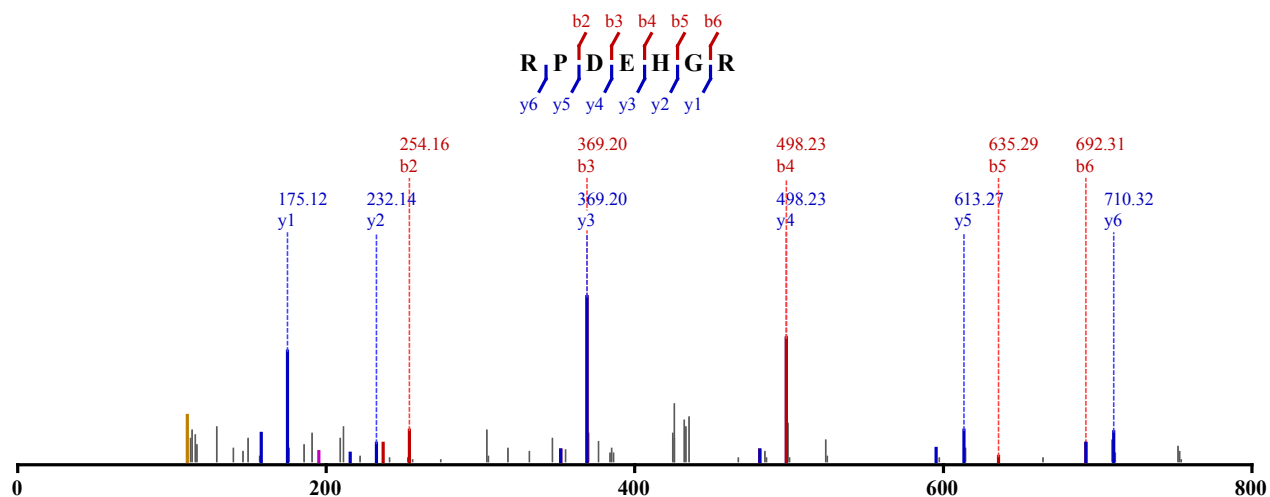

1 x Oxidation (M)

Identified in MSS481 with qvalue 0.00

Charge: 2, Exp. m/z: 876.988, Calc. m/z: 876.482

Data File: HeLa\_LysC\_pH5\_CID\_3xload\_3, Scans: 41058 - 41058

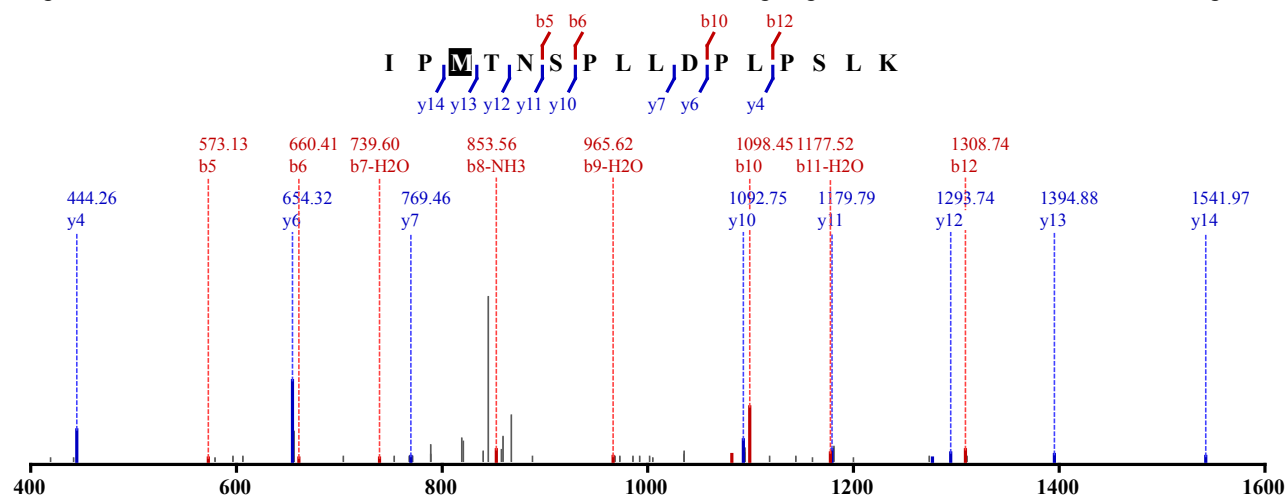

1 x Oxidation (M)

Identified in MSS481 with qvalue 0.00

Charge: 2, Exp. m/z: 876.486, Calc. m/z: 876.482

Data File: HeLa\_LysC\_pH5\_CID\_3xload\_3, Scans: 41062 - 41062

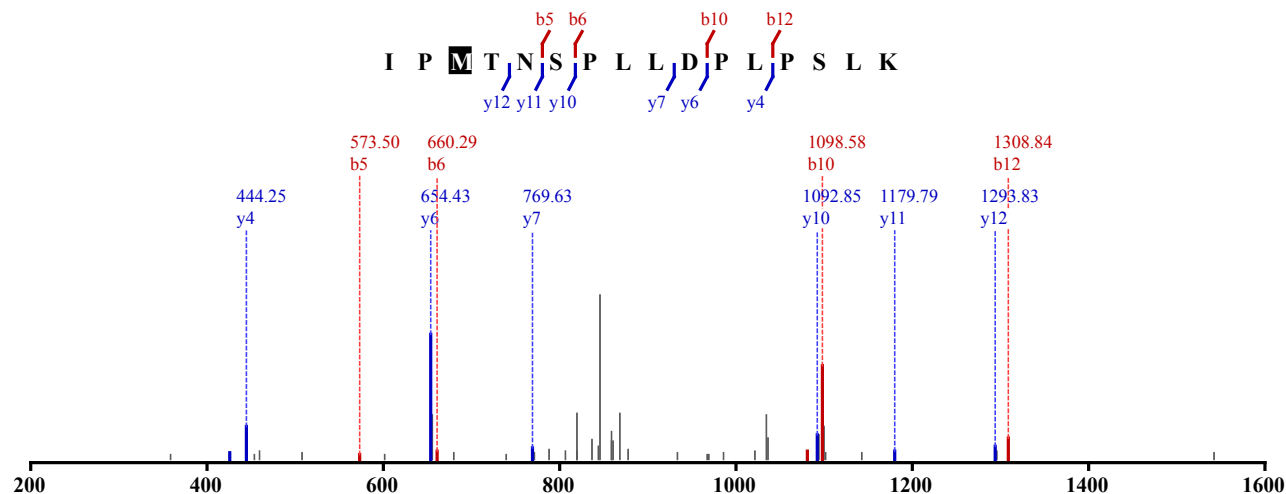

1 x Oxidation (M)

Identified in MSS481 with qvalue 0.00

Charge: 2, Exp. m/z: 876.987, Calc. m/z: 876.482

Data File: HeLa\_LysC\_pH5\_CID\_3xload\_3, Scans: 41123 - 41123

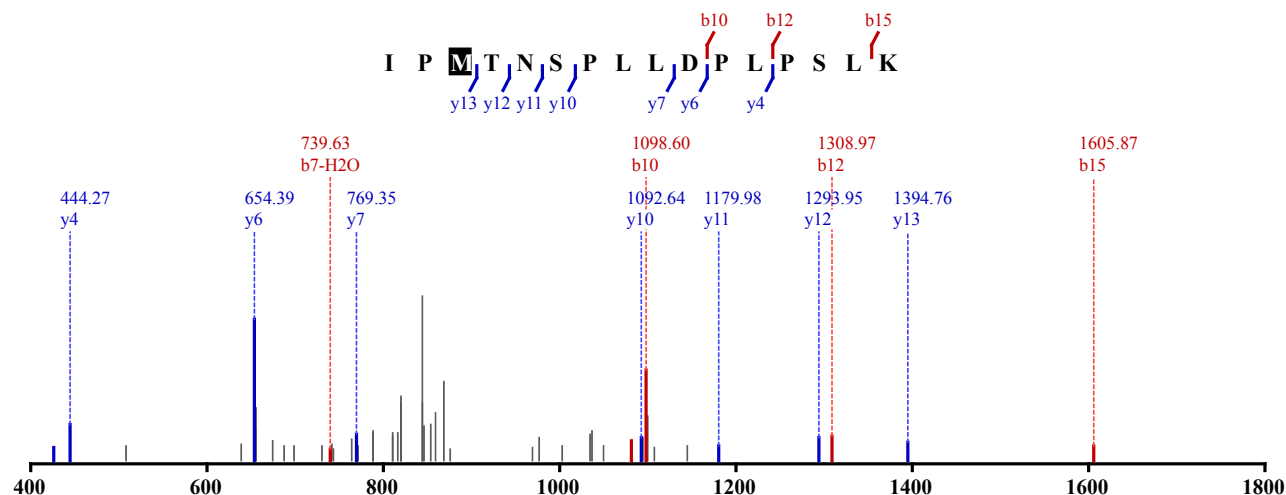

1 x Acetylation (Protein N-term)

Identified in MSS479 with qvalue 0.00

Charge: 2, Exp. m/z: 706.823, Calc. m/z: 706.822

Data File: HeLa\_AspN\_pH11\_HCD\_1, Scans: 10434 - 10434

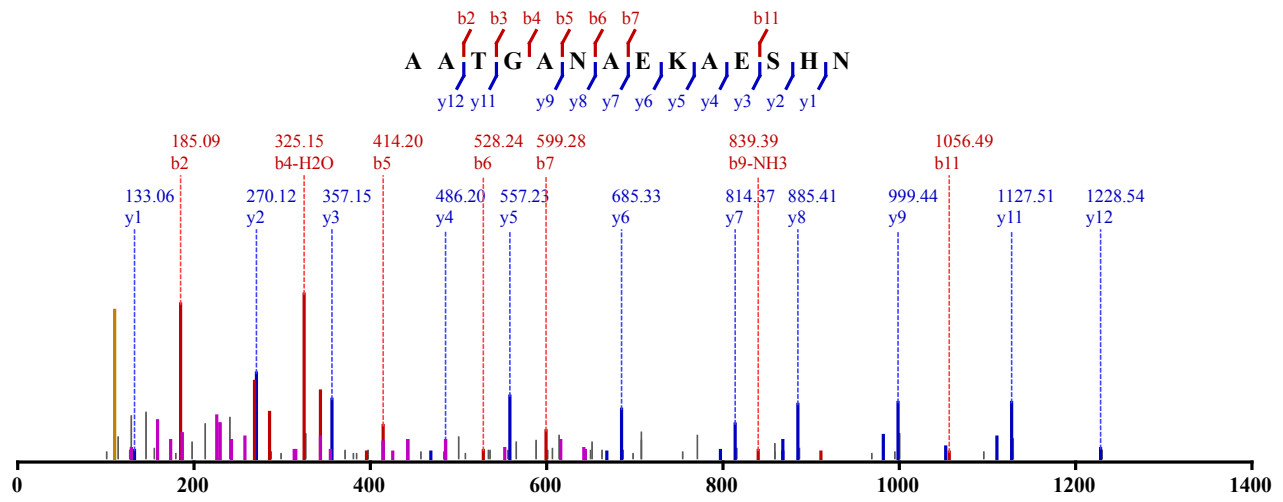

1 x Acetylation (Protein N-term)

Identified in MSS479 with qvalue 0.00

Charge: 2, Exp. m/z: 706.824, Calc. m/z: 706.822

Data File: HeLa\_AspN\_pH11\_HCD\_2, Scans: 9177 - 9177

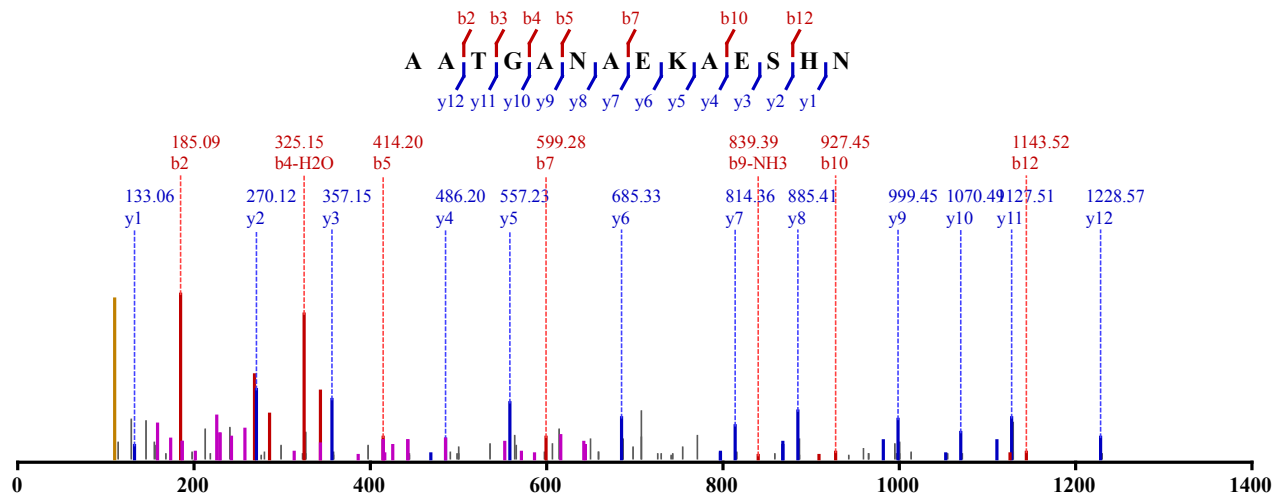

1 x Acetylation (Protein N-term)

Identified in MSS479 with qvalue 0.00

Charge: 2, Exp. m/z: 706.823, Calc. m/z: 706.822

Data File: HeLa\_AspN\_pH11\_HCD\_3, Scans: 8935 - 8935

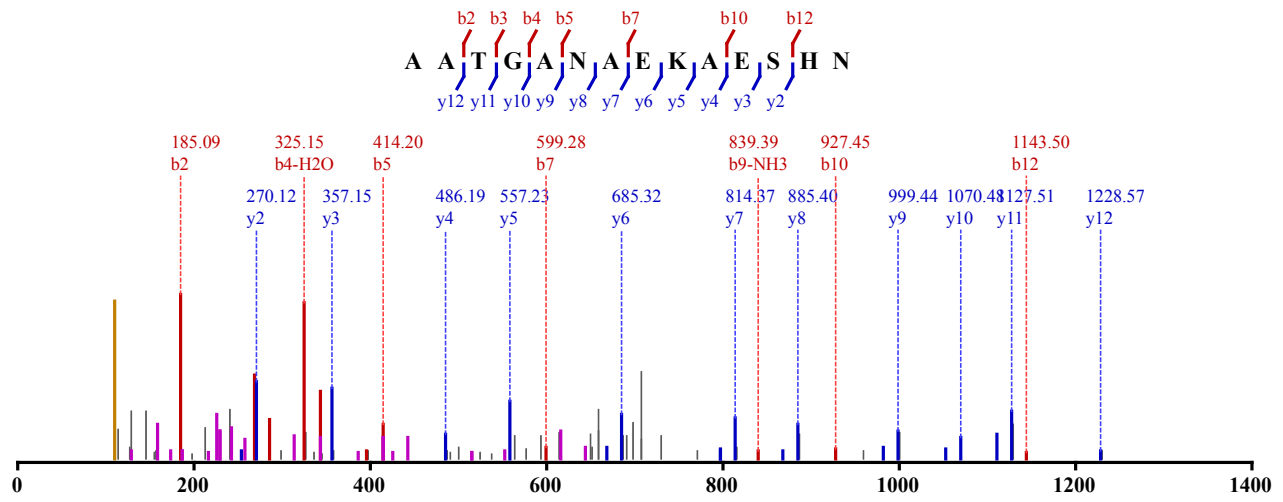

1 x Acetylation (Protein N-term)

Identified in MSS483 with qvalue 0.00

Charge: 2, Exp. m/z: 706.824, Calc. m/z: 706.822

Data File: HeLa\_AspN\_pH11\_CID\_3xload, Scans: 7940 - 7940

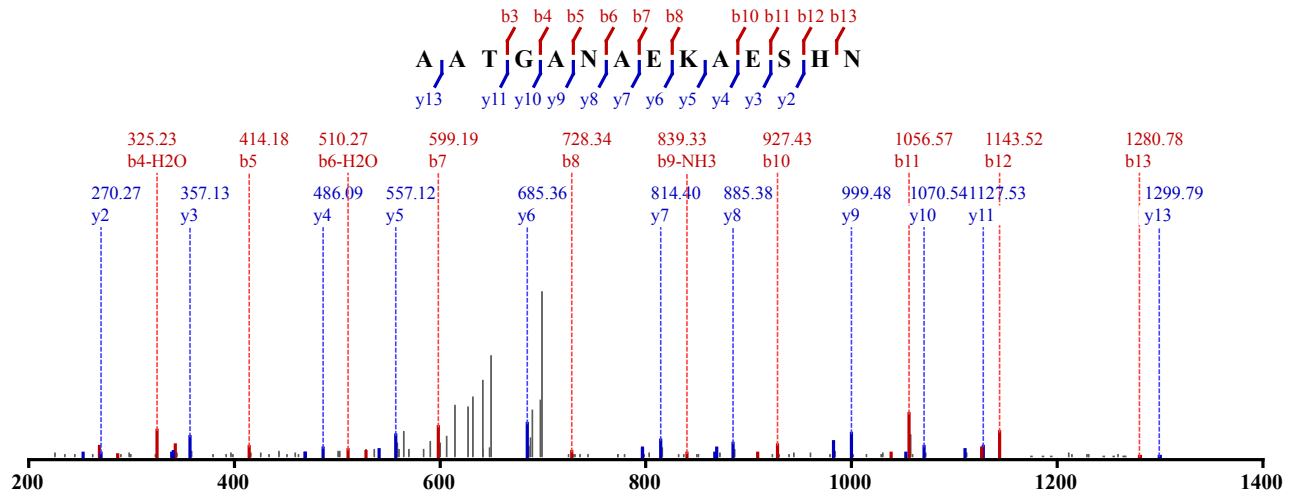

1 x Oxidation (M)

Identified in MSS484 with qvalue 0.00

Charge: 2, Exp. m/z: 608.817, Calc. m/z: 608.817

Data File: HeLa\_Try\_pH11\_HCD\_2, Scans: 50302 - 50302

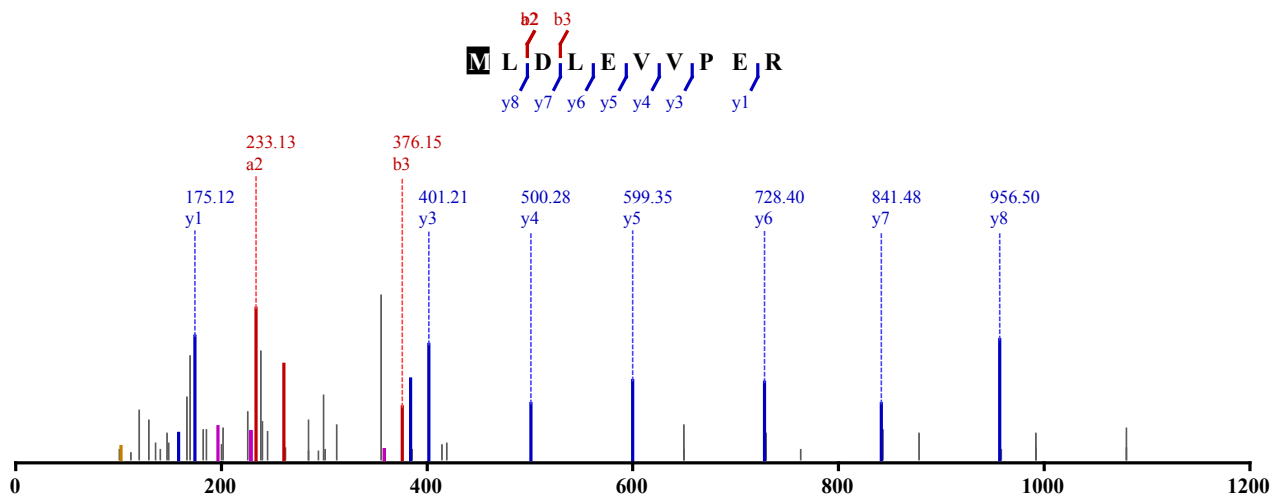

1 x Oxidation (M)

Identified in MSS484 with qvalue 0.00

Charge: 2, Exp. m/z: 608.816, Calc. m/z: 608.817

Data File: HeLa\_Try\_pH11\_HCD\_3, Scans: 44508 - 44508

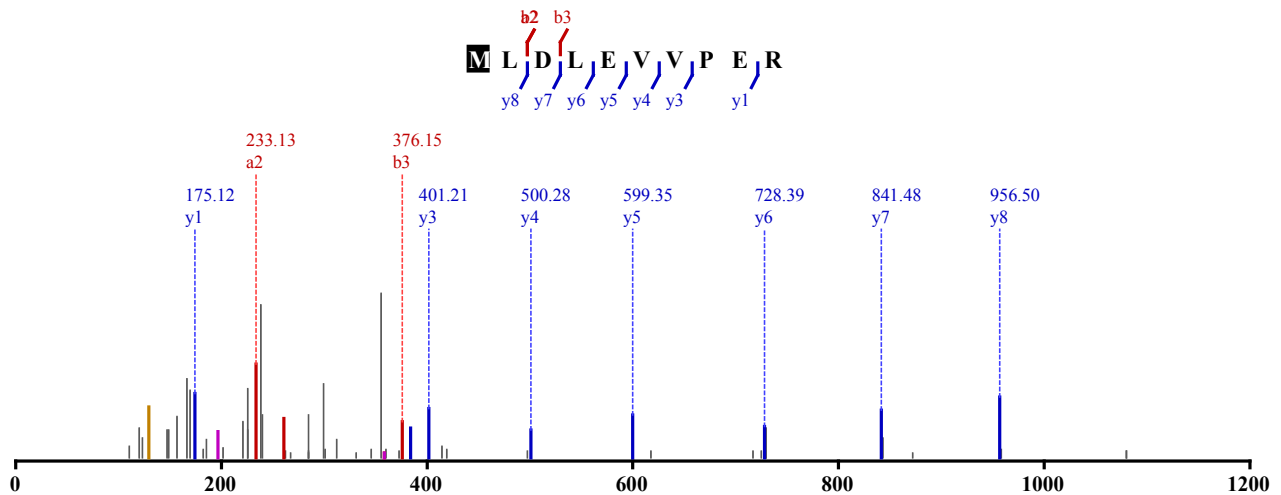

Not Modified

Identified in MSS484 with qvalue 0.00

Charge: 2, Exp. m/z: 600.818, Calc. m/z: 600.817

Data File: HeLa\_Try\_pH5\_HCD\_1, Scans: 45962 - 45962

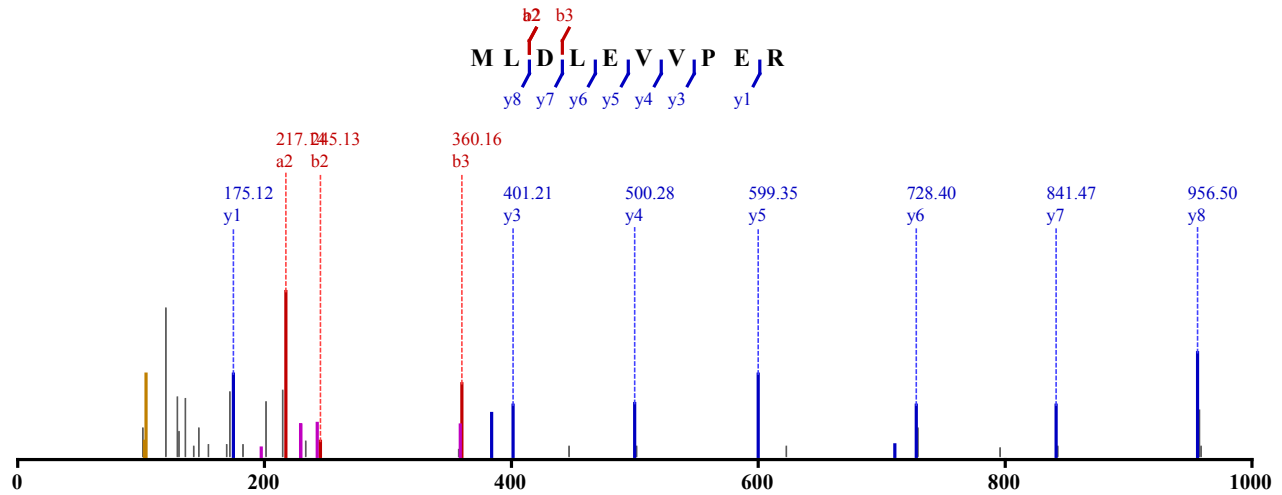

1 x Oxidation (M)

Identified in MSS484 with qvalue 0.00

Charge: 2, Exp. m/z: 608.815, Calc. m/z: 608.817

Data File: HeLa\_Try\_pH11\_HCD\_1, Scans: 48859 - 48859

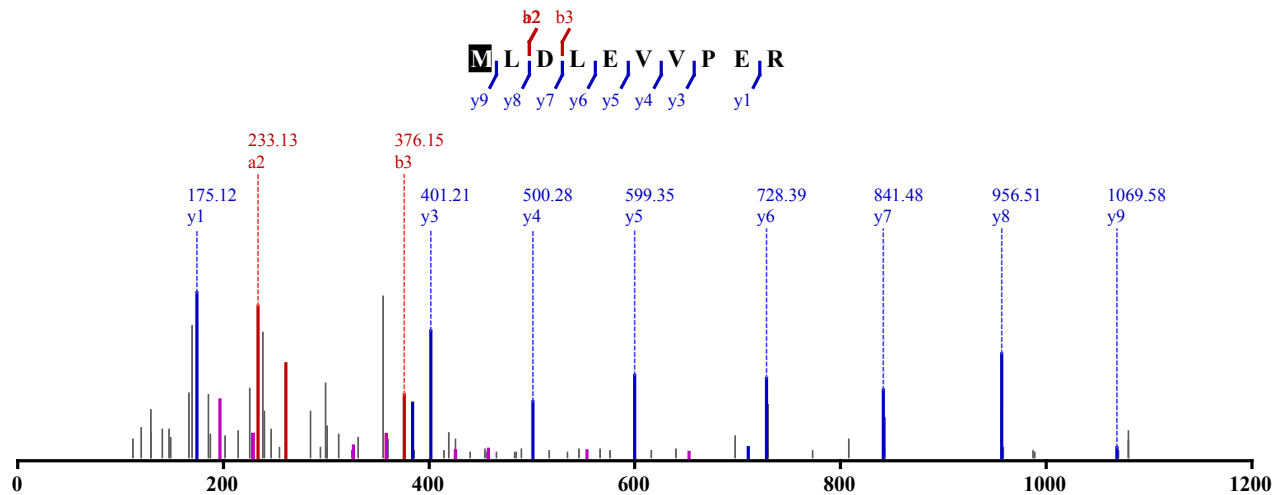

1 x Oxidation (M)

Identified in MSS484 with qvalue 0.00

Charge: 2, Exp. m/z: 608.816, Calc. m/z: 608.817

Data File: HeLa\_Try\_pH11\_HCD\_2, Scans: 50181 - 50181

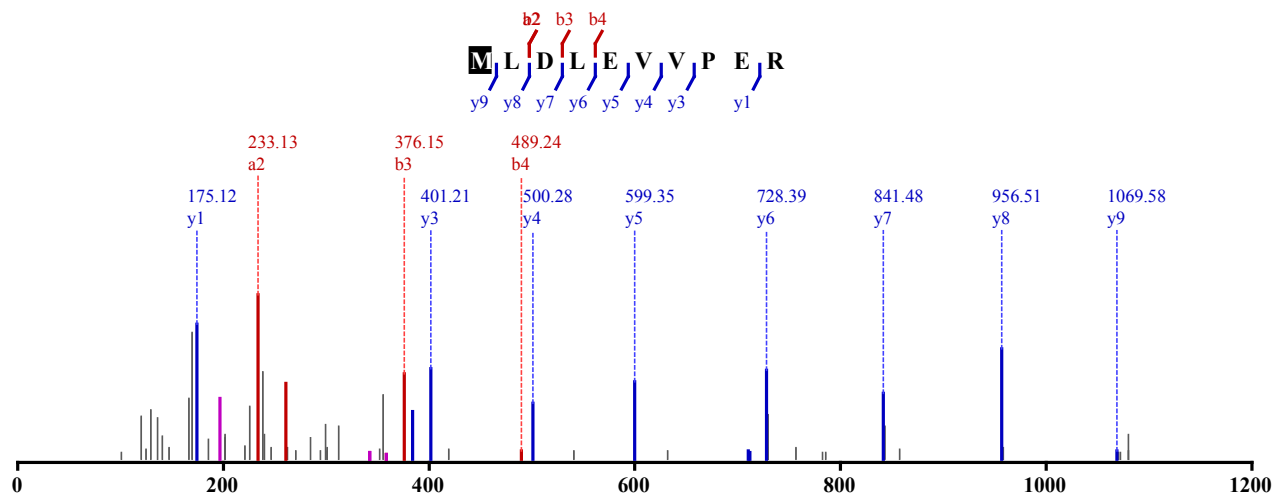

1 x Oxidation (M)  
 Identified in MSS484 with qvalue 0.00  
 Charge: 2, Exp. m/z: 608.815, Calc. m/z: 608.817  
 Data File: HeLa\_TrypH11\_HCD\_3, Scans: 44405 - 44405

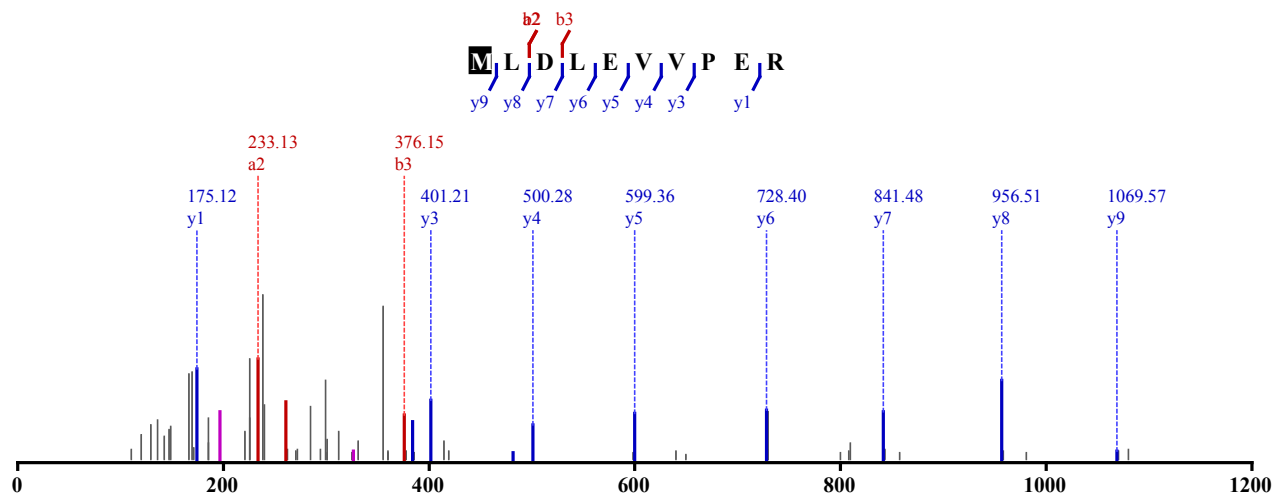

1 x Oxidation (M)  
 Identified in MSS488 with qvalue 0.00  
 Charge: 2, Exp. m/z: 608.816, Calc. m/z: 608.817  
 Data File: HeLa\_chy-trypH11\_CID\_3xload\_2, Scans: 28288 - 28288

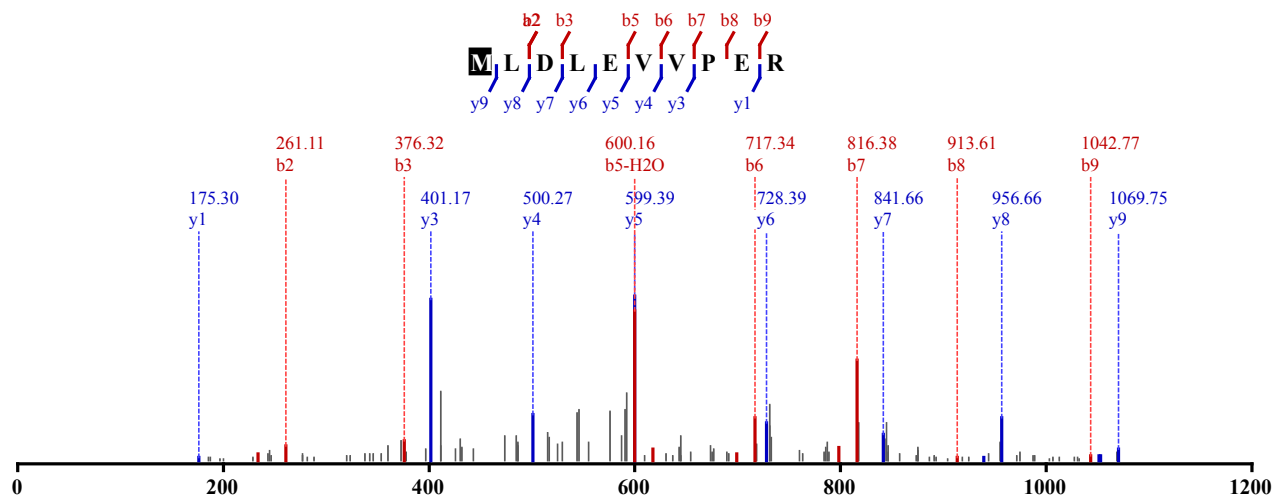

1 x Oxidation (M)  
 Identified in MSS488 with qvalue 0.01  
 Charge: 2, Exp. m/z: 608.818, Calc. m/z: 608.817



Data File: HeLa\_chy-try\_pH11\_CID\_3xload\_3, Scans: 44896 - 44896

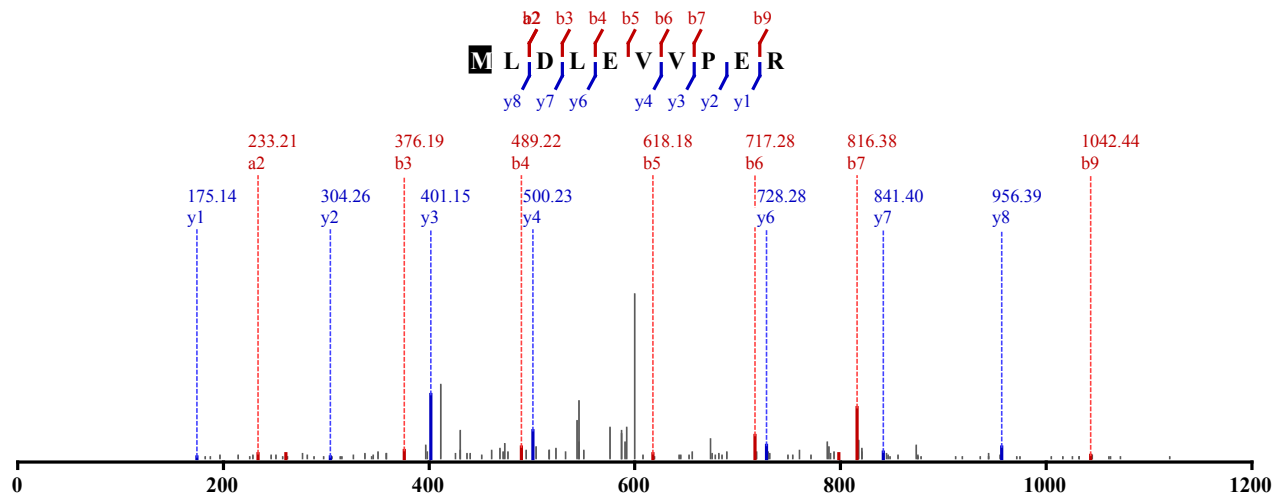

1 x Oxidation (M)

Identified in MSS488 with qvalue 0.00

Charge: 2, Exp. m/z: 608.817, Calc. m/z: 608.817

Data File: HeLa\_chy-try\_pH11\_CID\_3xload\_3, Scans: 44966 - 44966

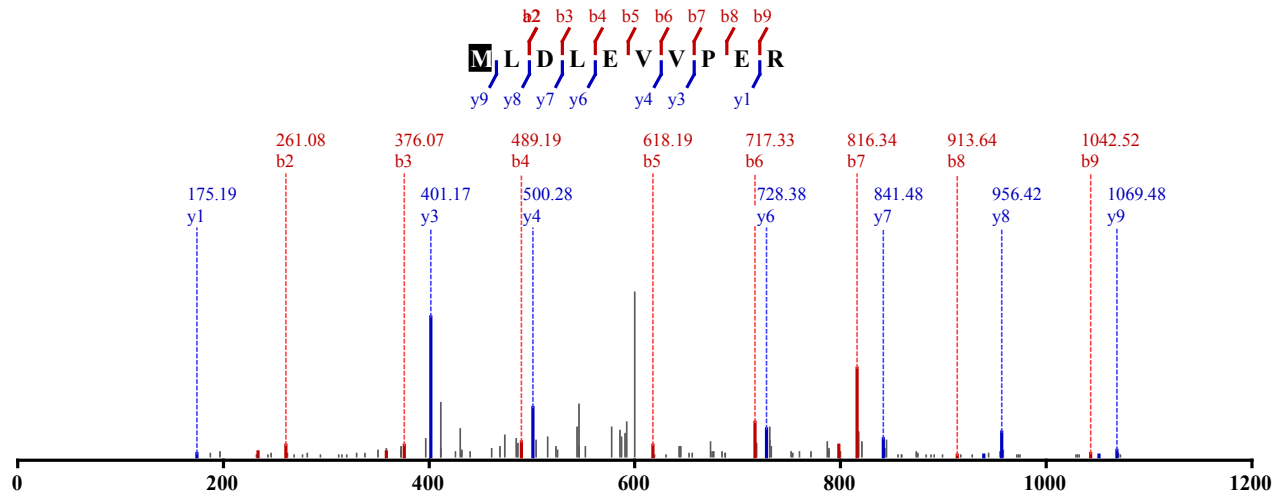

1 x Oxidation (M)

Identified in MSS488 with qvalue 0.00

Charge: 2, Exp. m/z: 608.817, Calc. m/z: 608.817

Data File: HeLa\_chy-try\_pH11\_CID\_3xload, Scans: 49325 - 49325

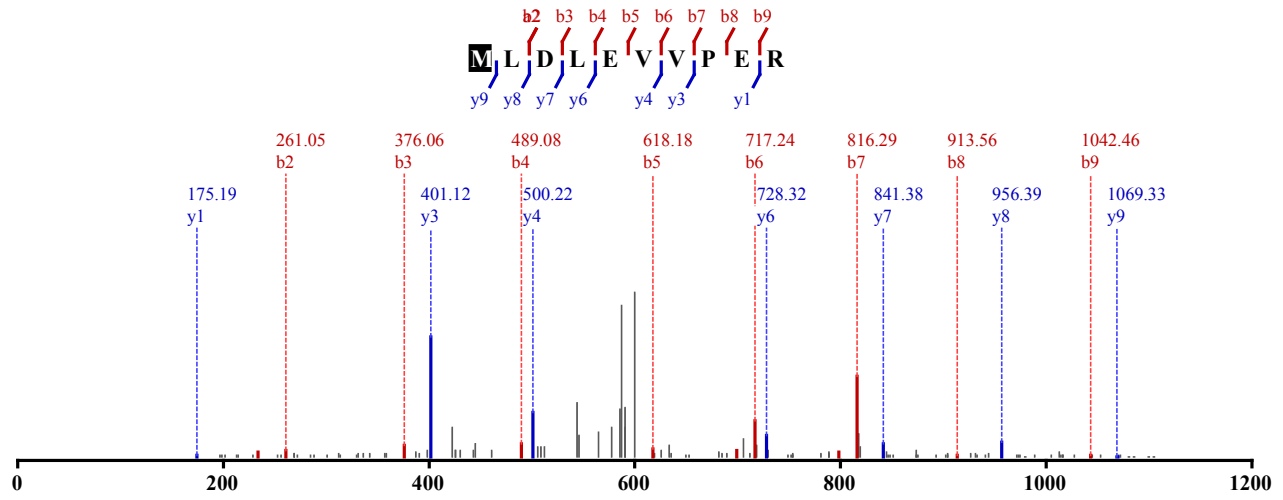

1 x Oxidation (M)

Identified in MSS488 with qvalue 0.00

Charge: 2, Exp. m/z: 608.820, Calc. m/z: 608.817

Data File: HeLa\_chy-try\_pH11\_CID\_3xload, Scans: 49399 - 49399

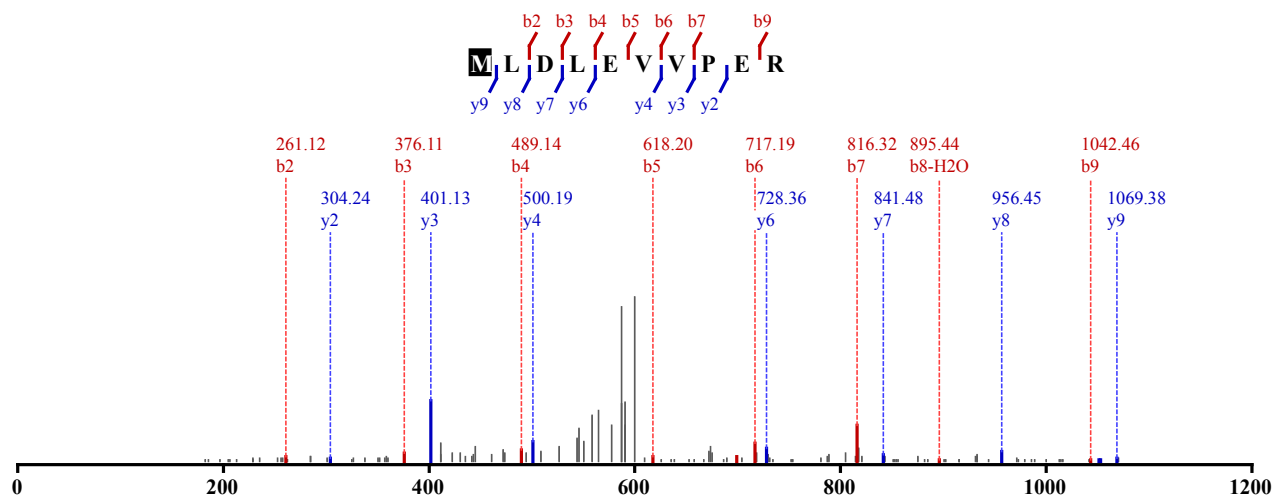

1 x Oxidation (M)

Identified in MSS488 with qvalue 0.00

Charge: 2, Exp. m/z: 608.820, Calc. m/z: 608.817

Data File: HeLa\_chy-try\_pH11\_CID\_3xload, Scans: 49428 - 49428

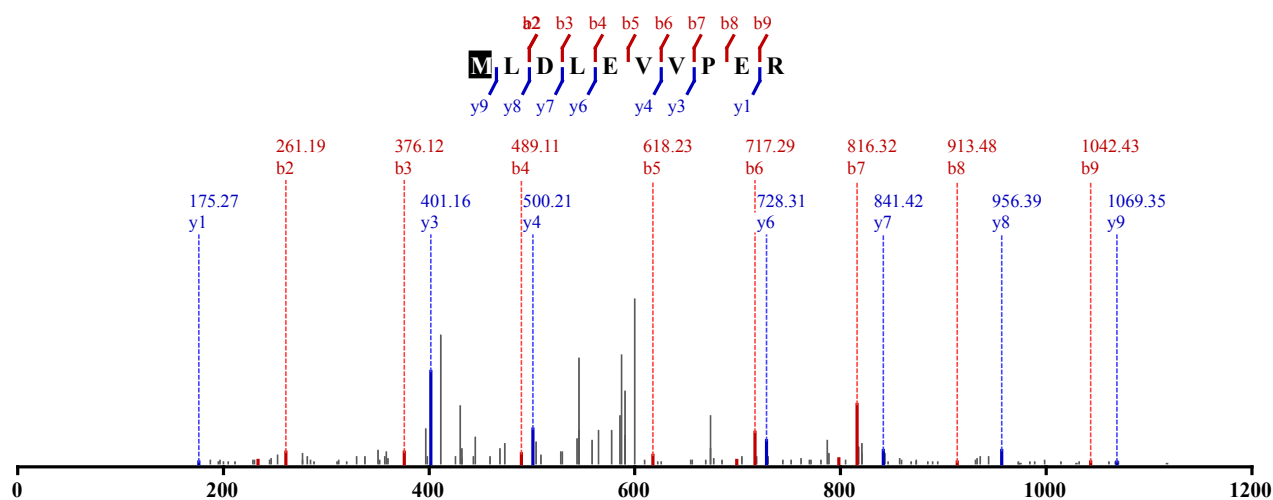

1 x Oxidation (M)

Identified in MSS488 with qvalue 0.00

Charge: 2, Exp. m/z: 608.817, Calc. m/z: 608.817

Data File: HeLa\_chy-try\_pH11\_CID\_3xload, Scans: 49498 - 49498

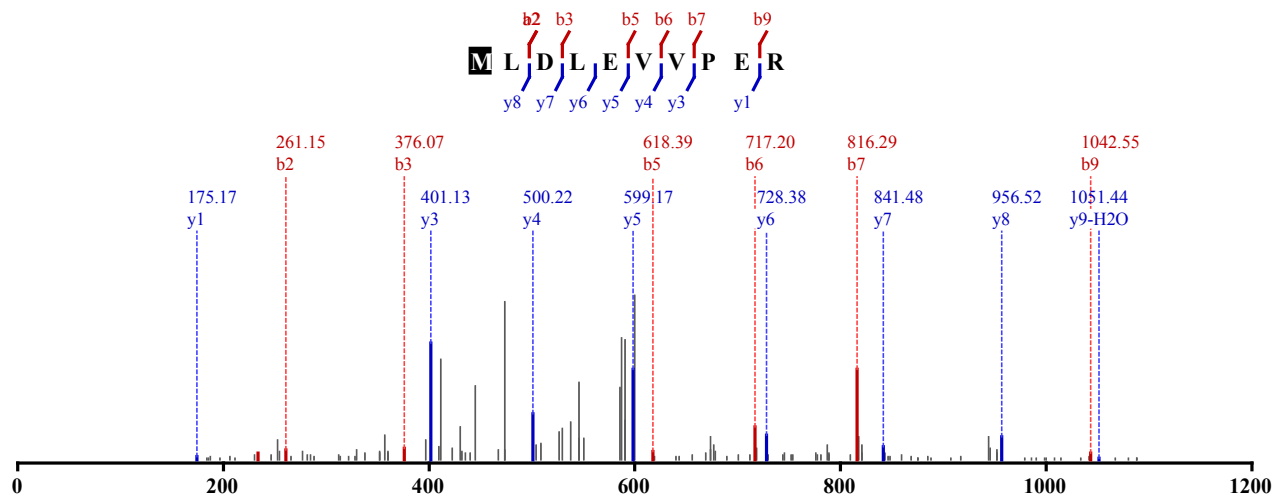

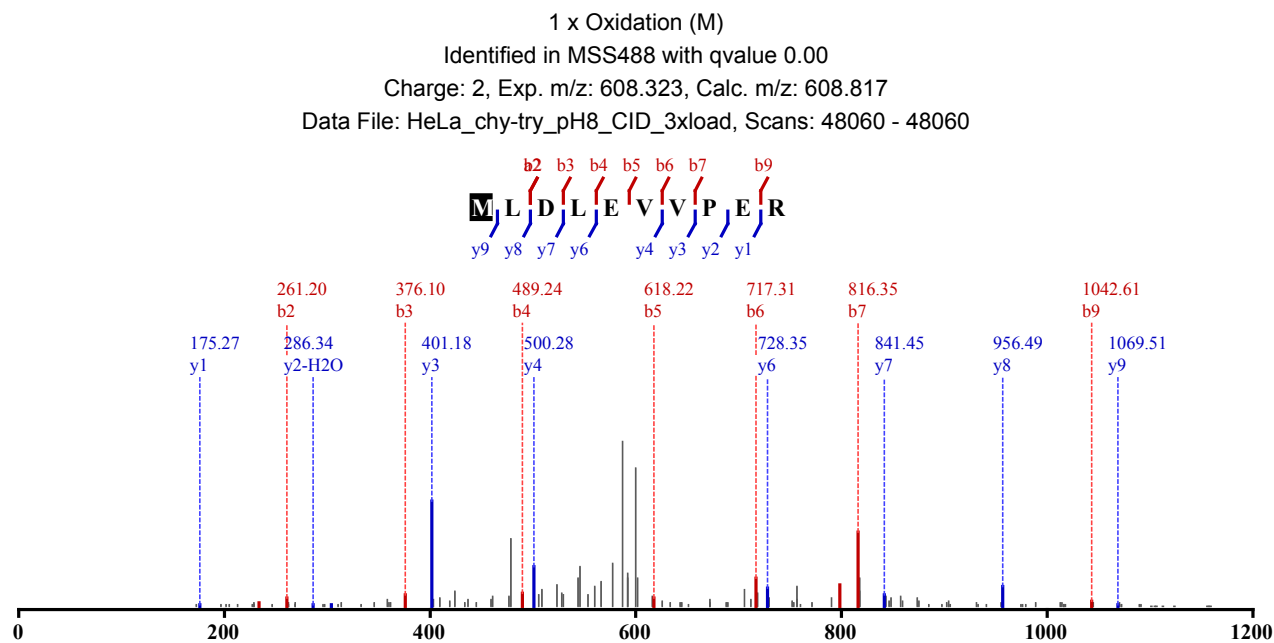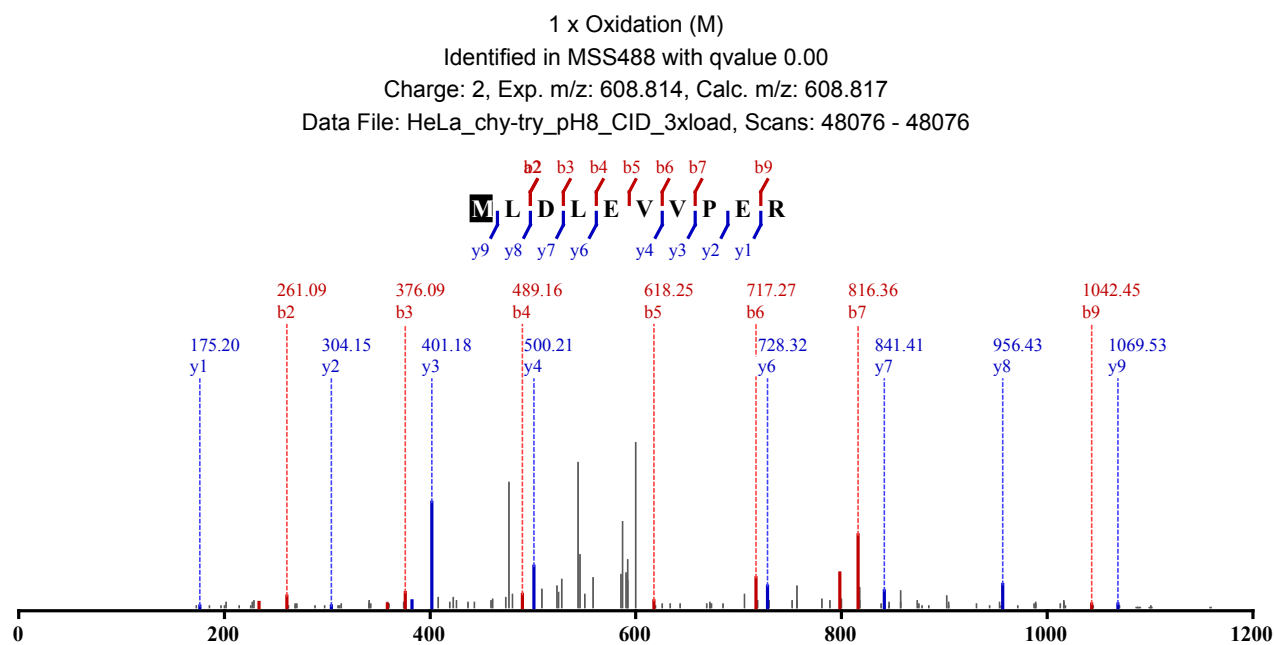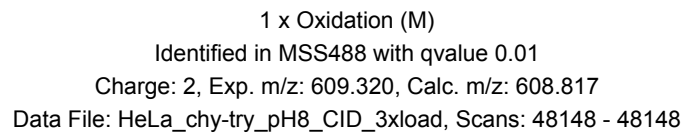

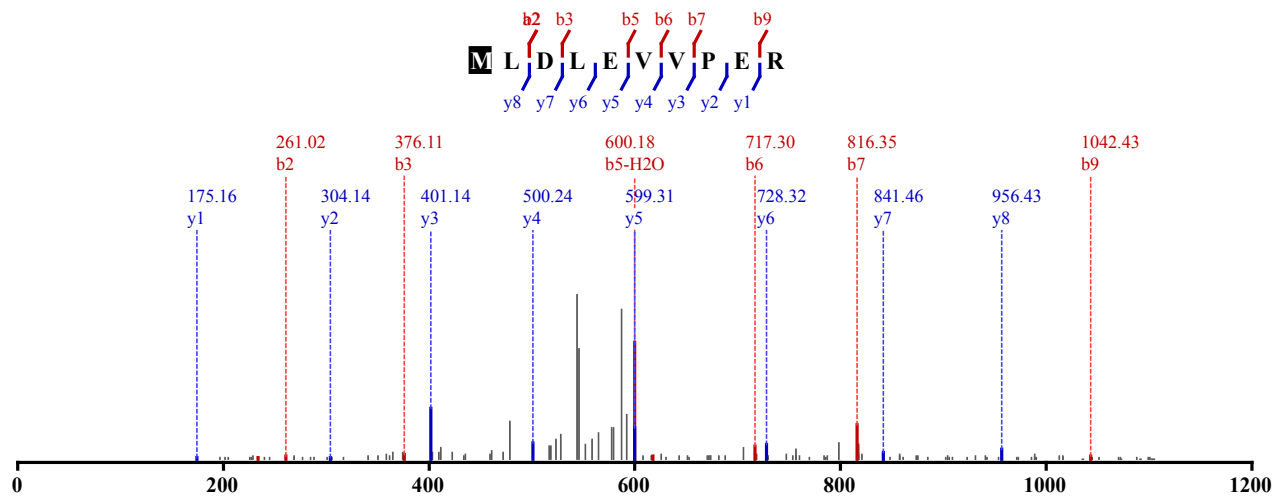

Not Modified  
 Identified in MSS484 with qvalue 0.00  
 Charge: 2, Exp. m/z: 774.371, Calc. m/z: 774.372  
 Data File: HeLa\_Try\_pH3\_HCD\_1, Scans: 29527 - 29527

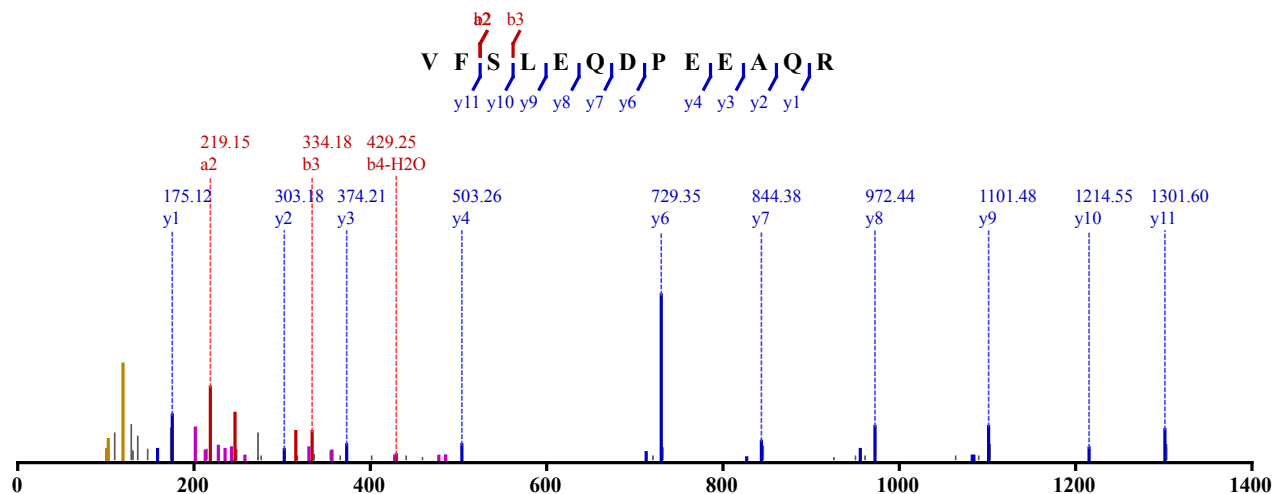

Not Modified  
 Identified in MSS479 with qvalue 0.00  
 Charge: 3, Exp. m/z: 521.610, Calc. m/z: 521.611  
 Data File: HeLa\_AspN\_pH11\_HCD\_1, Scans: 31896 - 31896

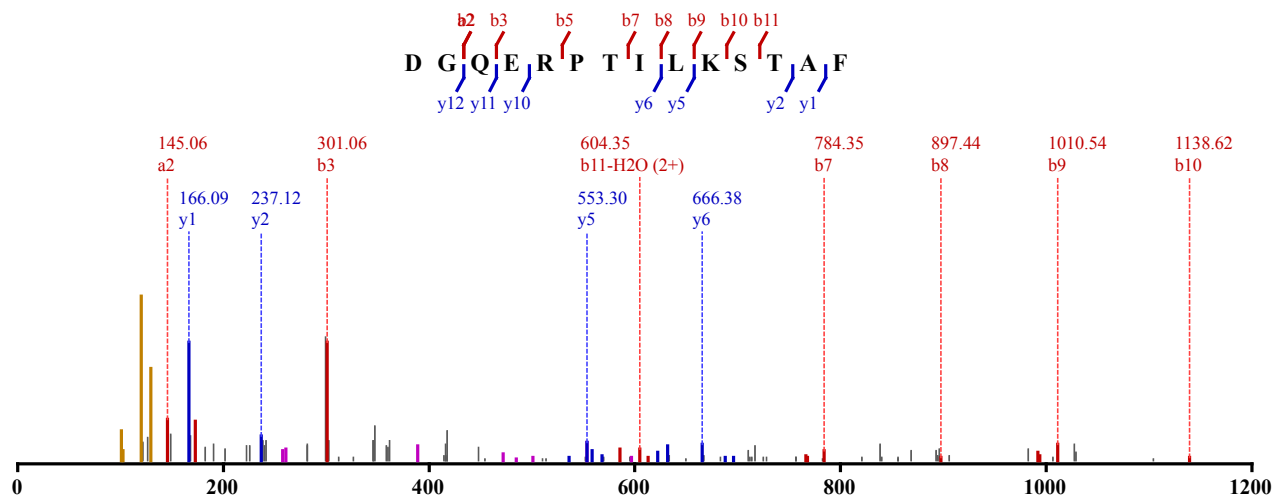

Not Modified  
 Identified in MSS479 with qvalue 0.00  
 Charge: 3, Exp. m/z: 521.611, Calc. m/z: 521.611

Data File: HeLa\_AspN\_pH11\_HCD\_1, Scans: 31793 - 31793

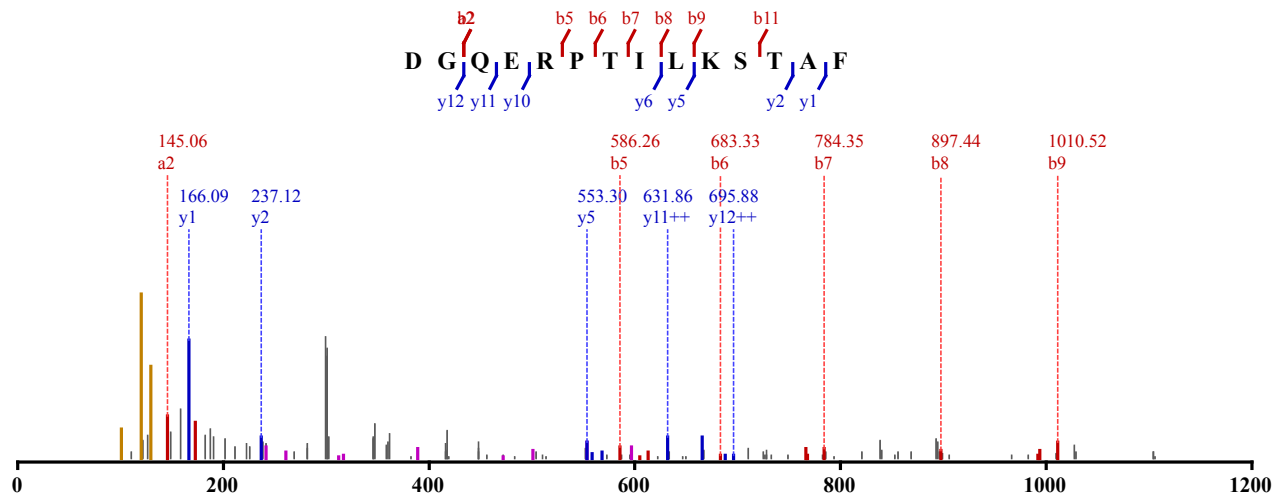

Not Modified

Identified in MSS479 with qvalue 0.00

Charge: 3, Exp. m/z: 521.611, Calc. m/z: 521.611

Data File: HeLa\_AspN\_pH11\_HCD\_2, Scans: 30772 - 30772

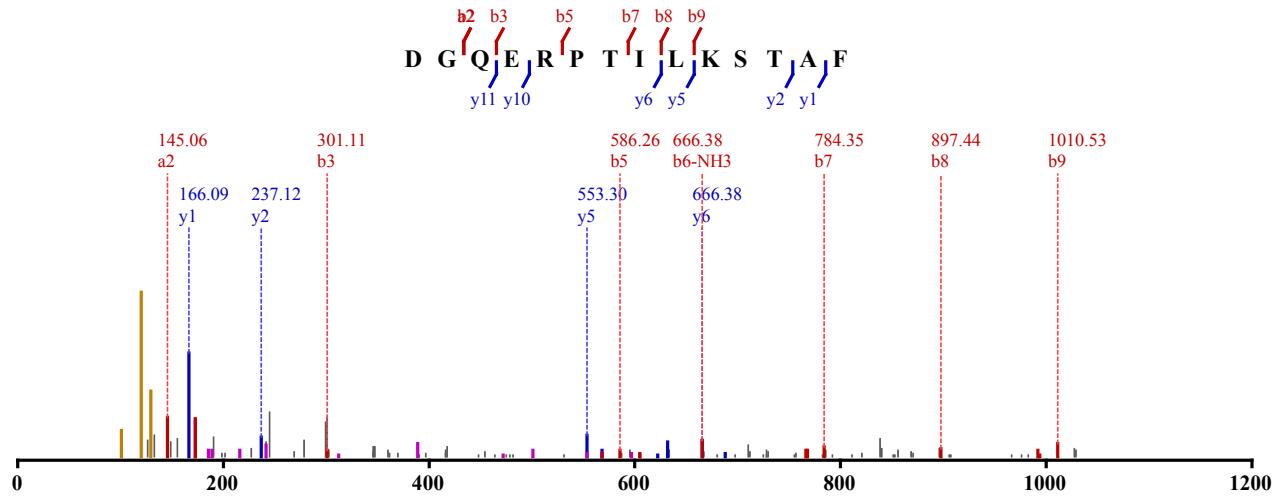

Not Modified

Identified in MSS479 with qvalue 0.00

Charge: 3, Exp. m/z: 521.611, Calc. m/z: 521.611

Data File: HeLa\_AspN\_pH11\_HCD\_3, Scans: 30010 - 30010

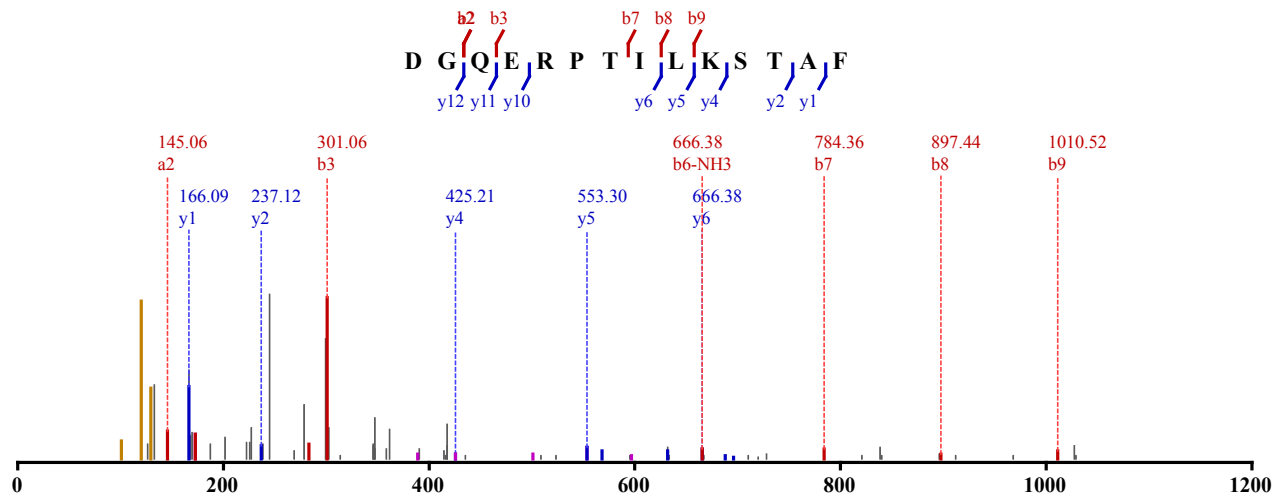

Not Modified

Identified in MSS479 with qvalue 0.00  
 Charge: 3, Exp. m/z: 521.611, Calc. m/z: 521.611  
 Data File: HeLa\_AspN\_pH11\_HCD\_2, Scans: 30683 - 30683

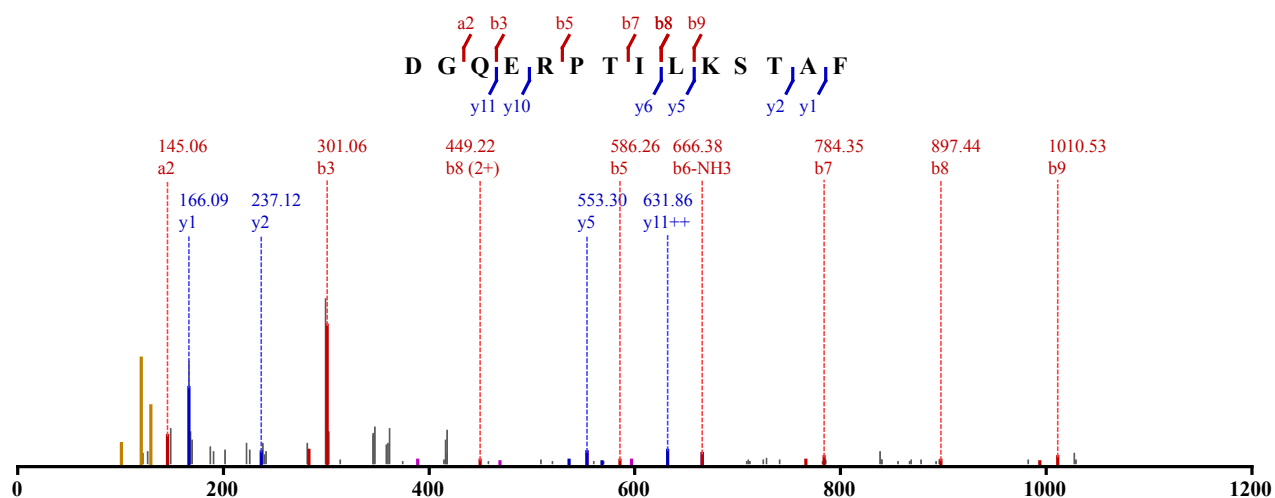

Not Modified  
 Identified in MSS479 with qvalue 0.00  
 Charge: 3, Exp. m/z: 521.611, Calc. m/z: 521.611  
 Data File: HeLa\_AspN\_pH8\_HCD\_1, Scans: 29116 - 29116

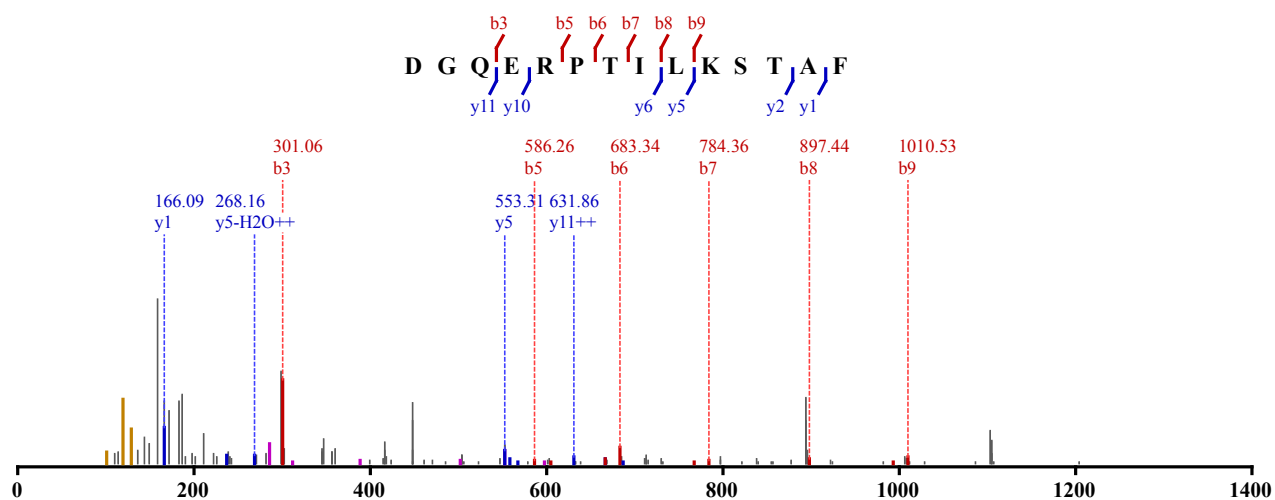

Not Modified  
 Identified in MSS479 with qvalue 0.00  
 Charge: 3, Exp. m/z: 521.611, Calc. m/z: 521.611  
 Data File: HeLa\_AspN\_pH8\_HCD\_2, Scans: 28192 - 28192

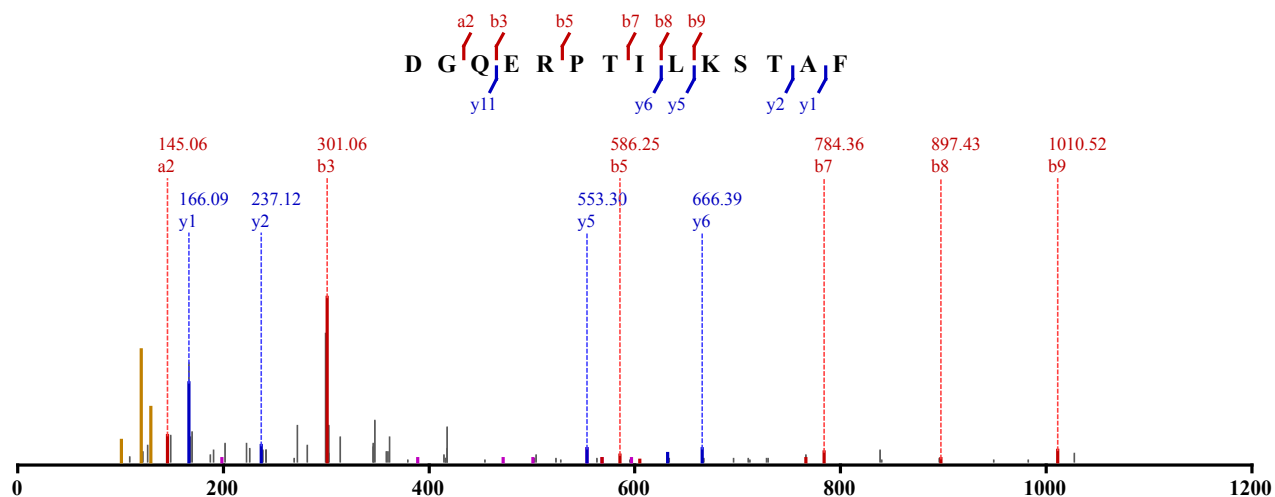

Not Modified

Identified in MSS479 with qvalue 0.00

Charge: 3, Exp. m/z: 521.611, Calc. m/z: 521.611

Data File: HeLa\_AspN\_pH8\_HCD\_3, Scans: 27486 - 27486

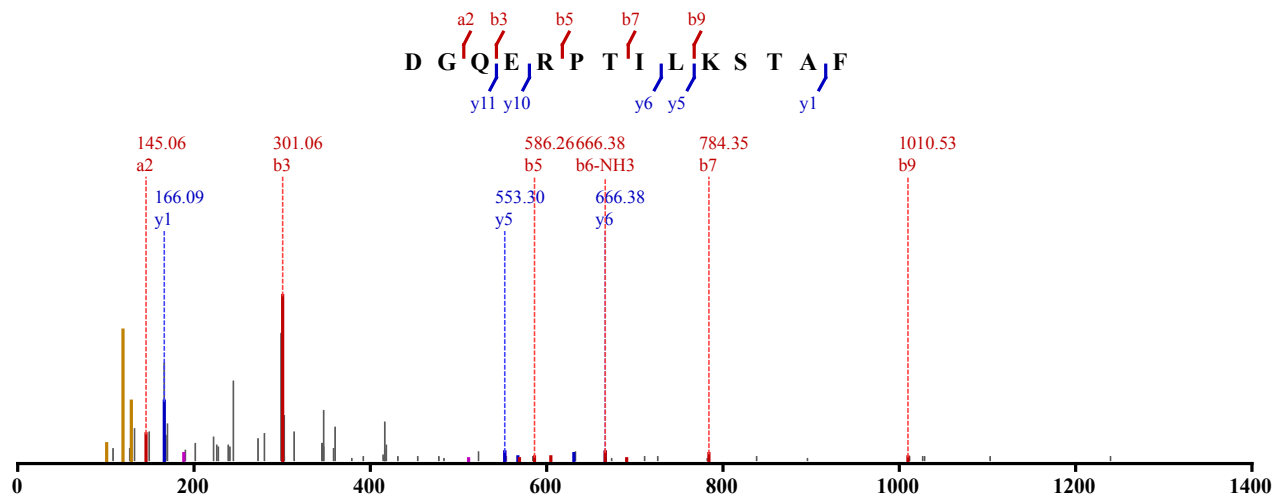

Not Modified

Identified in MSS479 with qvalue 0.01

Charge: 2, Exp. m/z: 781.914, Calc. m/z: 781.912

Data File: HeLa\_AspN\_pH11\_HCD\_2, Scans: 30703 - 30703

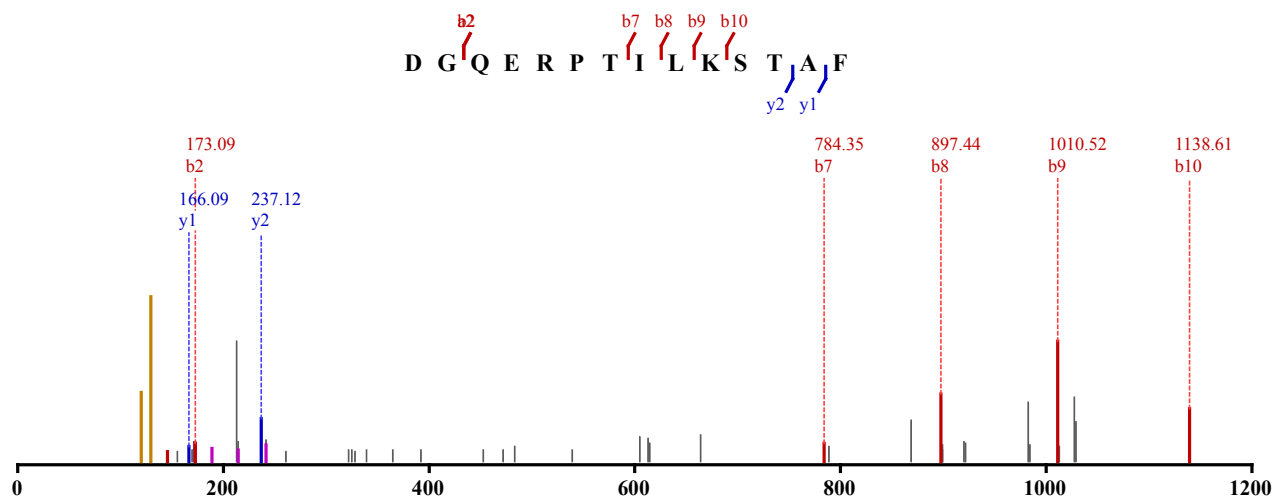

Not Modified

Identified in MSS479 with qvalue 0.00

Charge: 2, Exp. m/z: 781.912, Calc. m/z: 781.912

Data File: HeLa\_AspN\_pH11\_HCD\_3, Scans: 30040 - 30040

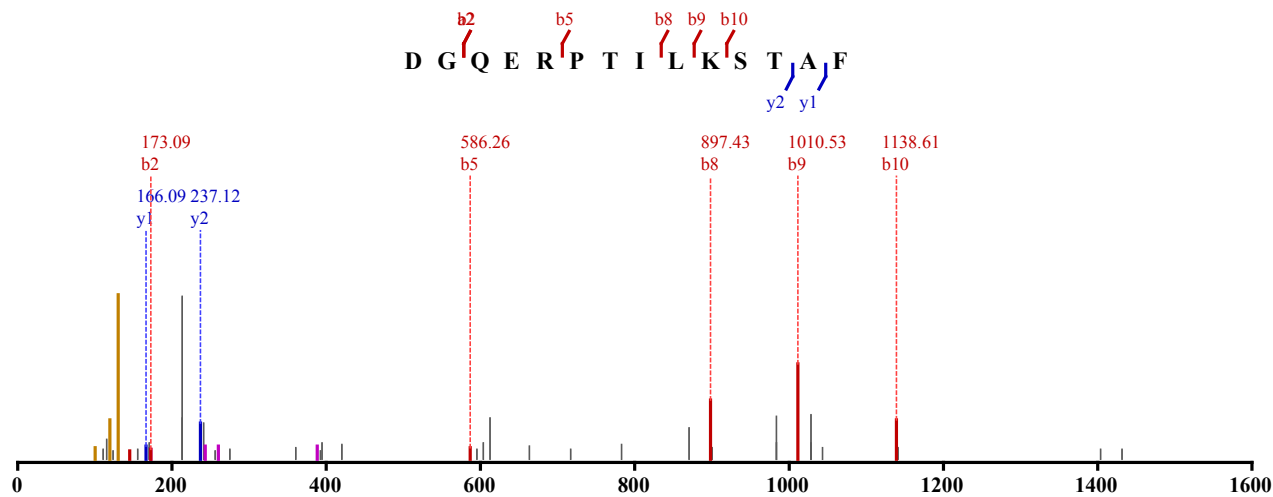

Not Modified  
 Identified in MSS479 with qvalue 0.00  
 Charge: 3, Exp. m/z: 521.611, Calc. m/z: 521.611  
 Data File: HeLa\_AspN\_pH11\_HCD\_3, Scans: 30099 - 30099

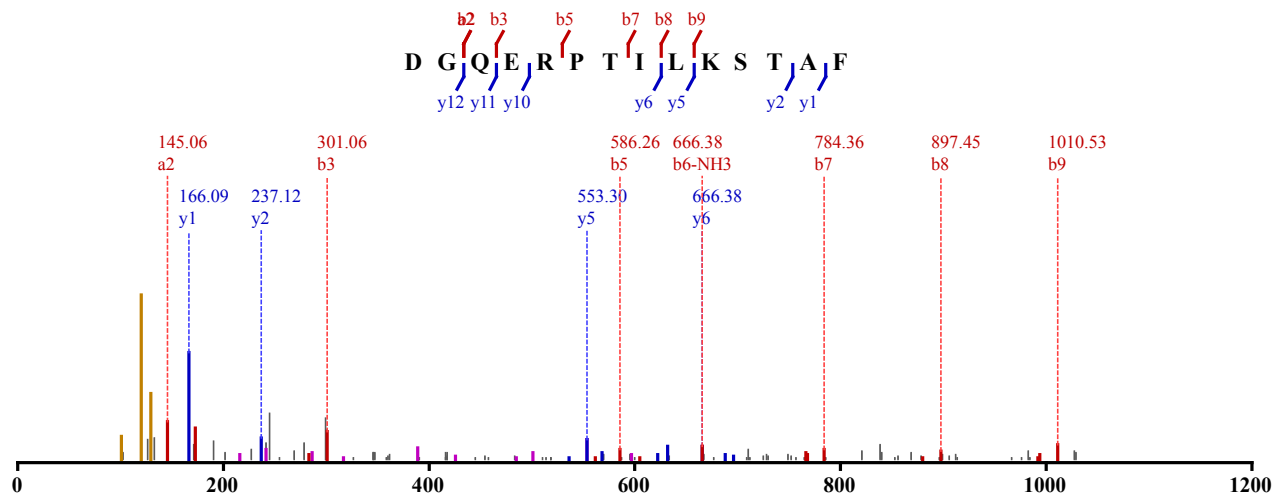

Not Modified  
 Identified in MSS479 with qvalue 0.00  
 Charge: 2, Exp. m/z: 781.911, Calc. m/z: 781.912  
 Data File: HeLa\_AspN\_pH11\_HCD\_3, Scans: 30141 - 30141

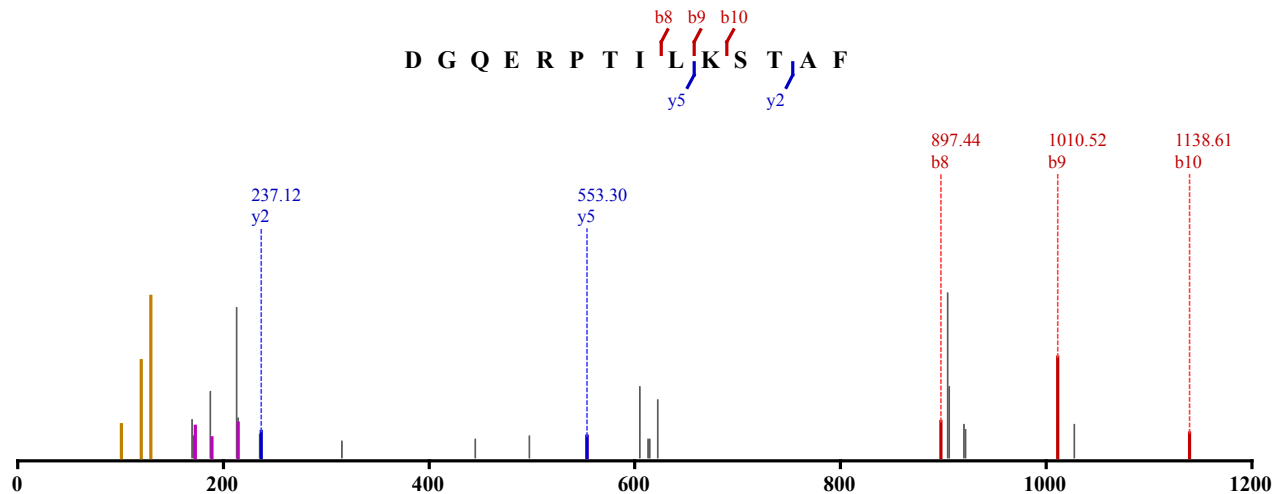

Not Modified  
 Identified in MSS479 with qvalue 0.00  
 Charge: 2, Exp. m/z: 781.912, Calc. m/z: 781.912



Data File: HeLa\_AspN\_pH8\_HCD\_2, Scans: 28224 - 28224

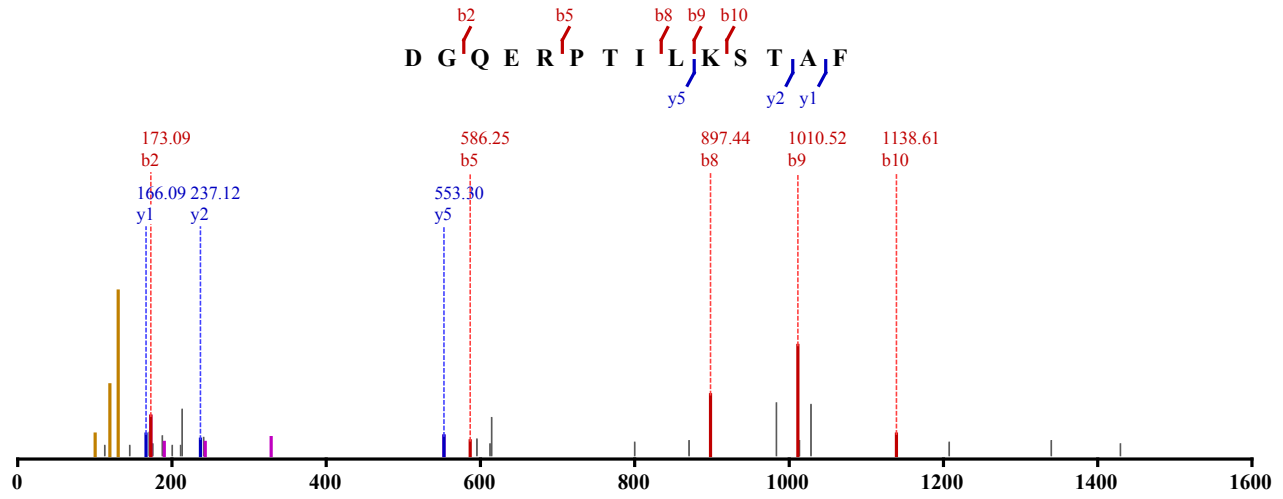

Not Modified

Identified in MSS483 with qvalue 0.00

Charge: 2, Exp. m/z: 781.913, Calc. m/z: 781.912

Data File: HeLa\_AspN\_pH11\_CID\_3xload\_2, Scans: 25801 - 25801

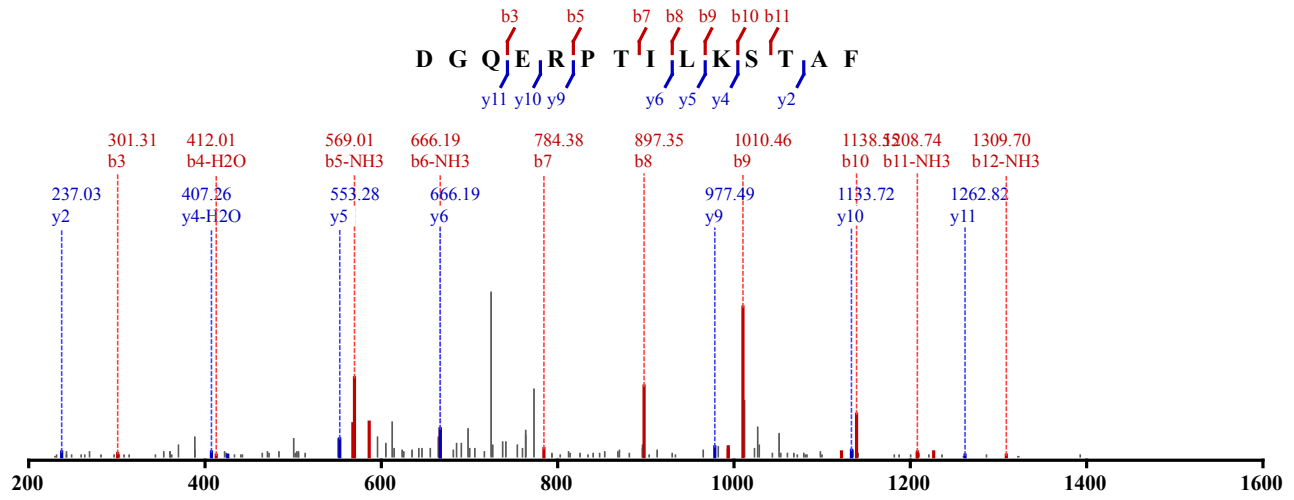

Not Modified

Identified in MSS483 with qvalue 0.00

Charge: 3, Exp. m/z: 521.611, Calc. m/z: 521.611

Data File: HeLa\_AspN\_pH11\_CID\_3xload\_2, Scans: 25773 - 25773

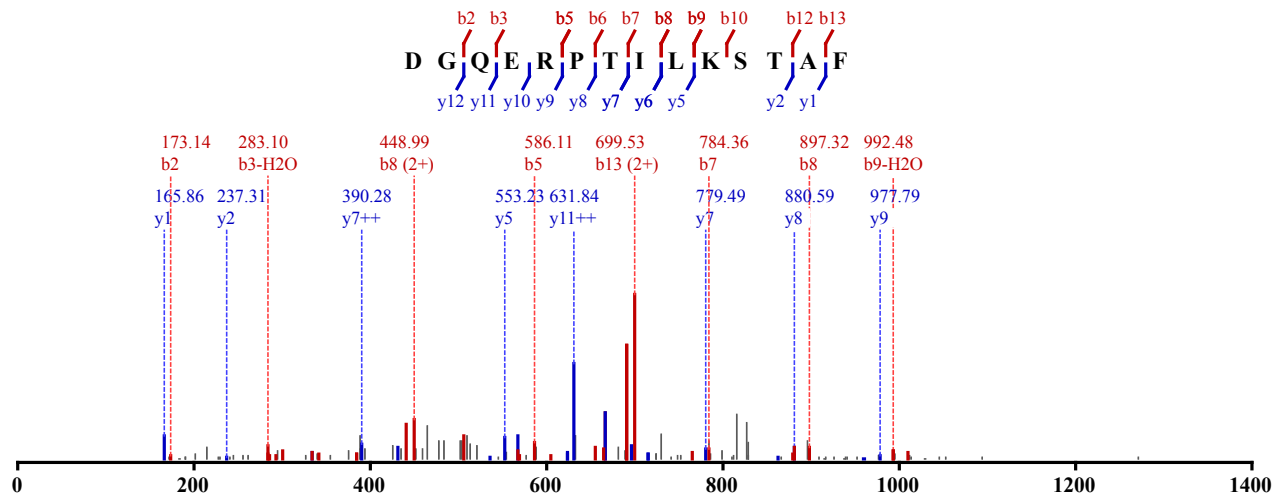

Not Modified

Identified in MSS483 with qvalue 0.00  
 Charge: 3, Exp. m/z: 521.610, Calc. m/z: 521.611  
 Data File: HeLa\_AspN\_pH11\_CID\_3xload\_2, Scans: 25856 - 25856

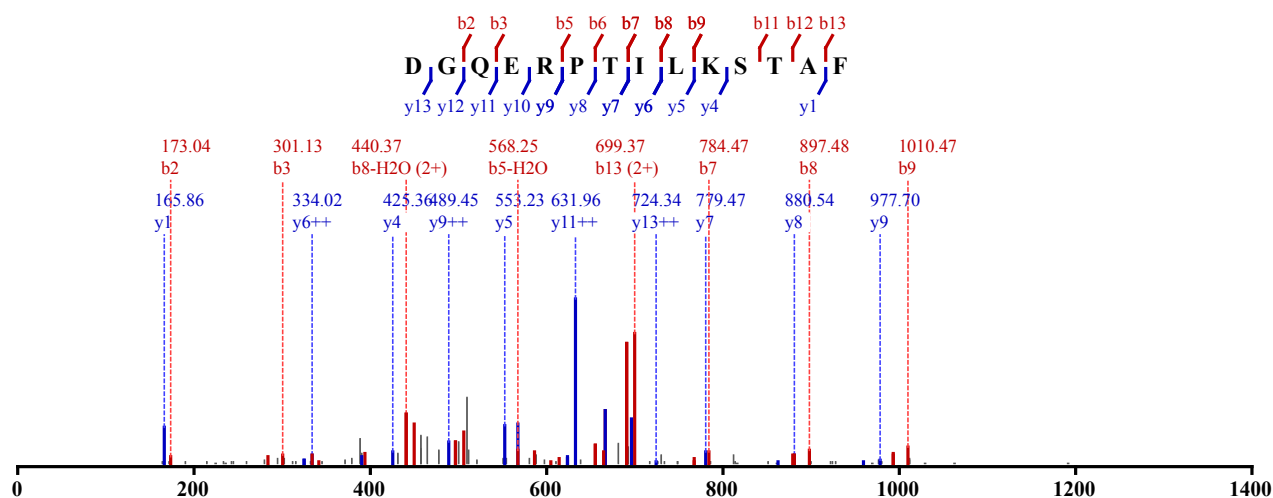

Not Modified  
 Identified in MSS483 with qvalue 0.00  
 Charge: 3, Exp. m/z: 521.611, Calc. m/z: 521.611  
 Data File: HeLa\_AspN\_pH11\_CID\_3xload\_2, Scans: 25950 - 25950

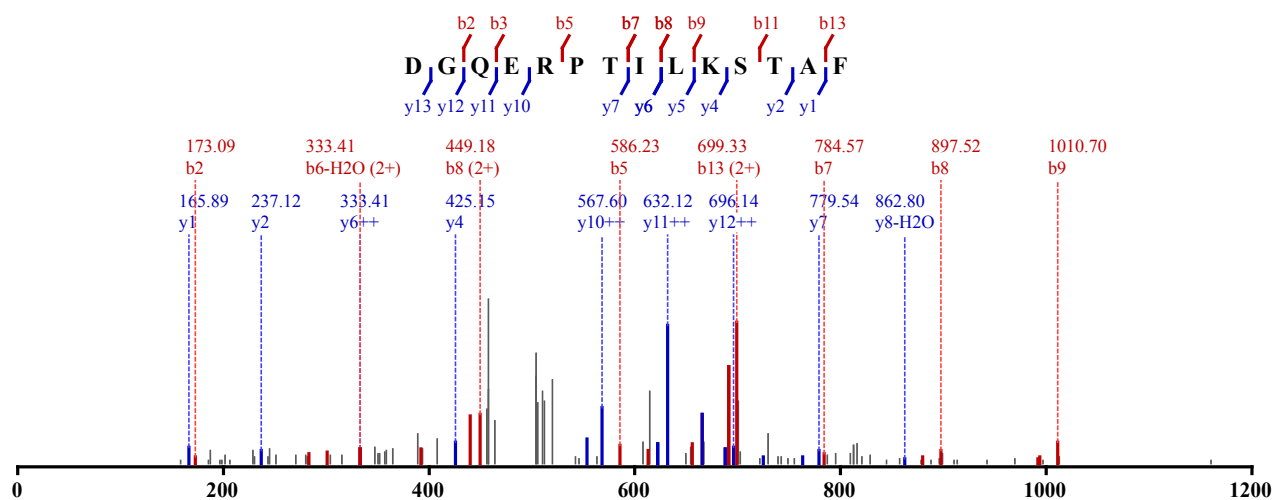

Not Modified  
 Identified in MSS483 with qvalue 0.00  
 Charge: 3, Exp. m/z: 521.611, Calc. m/z: 521.611  
 Data File: HeLa\_AspN\_pH11\_CID\_3xload, Scans: 24821 - 24821

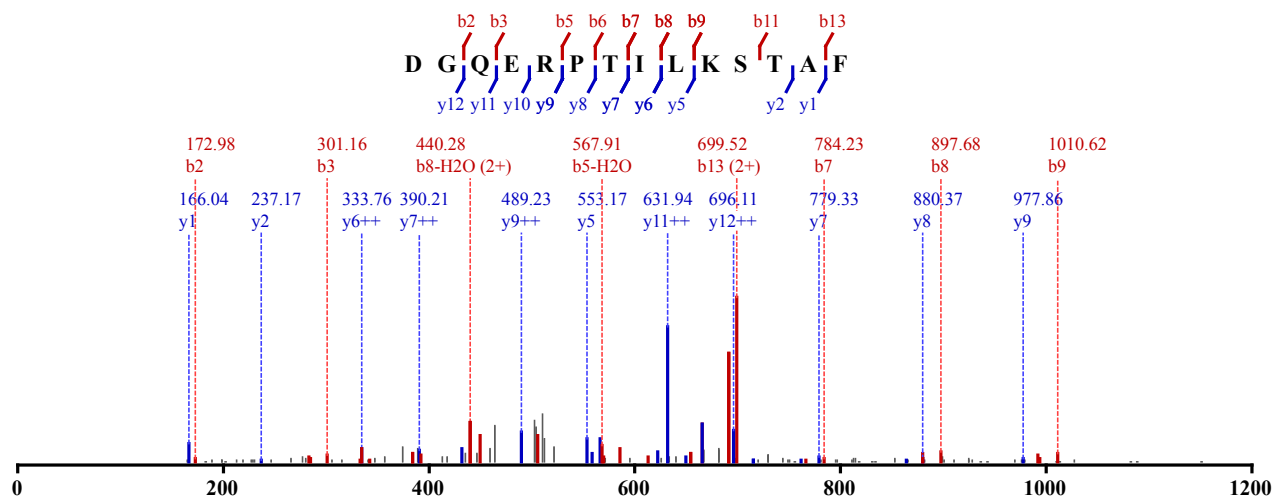

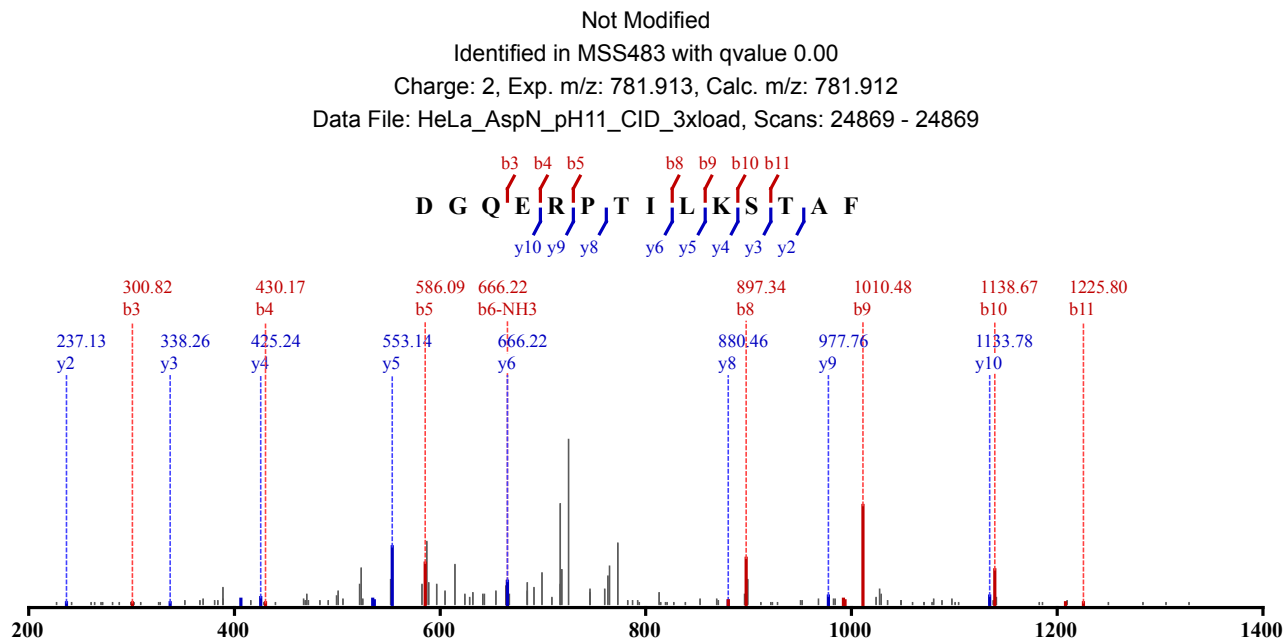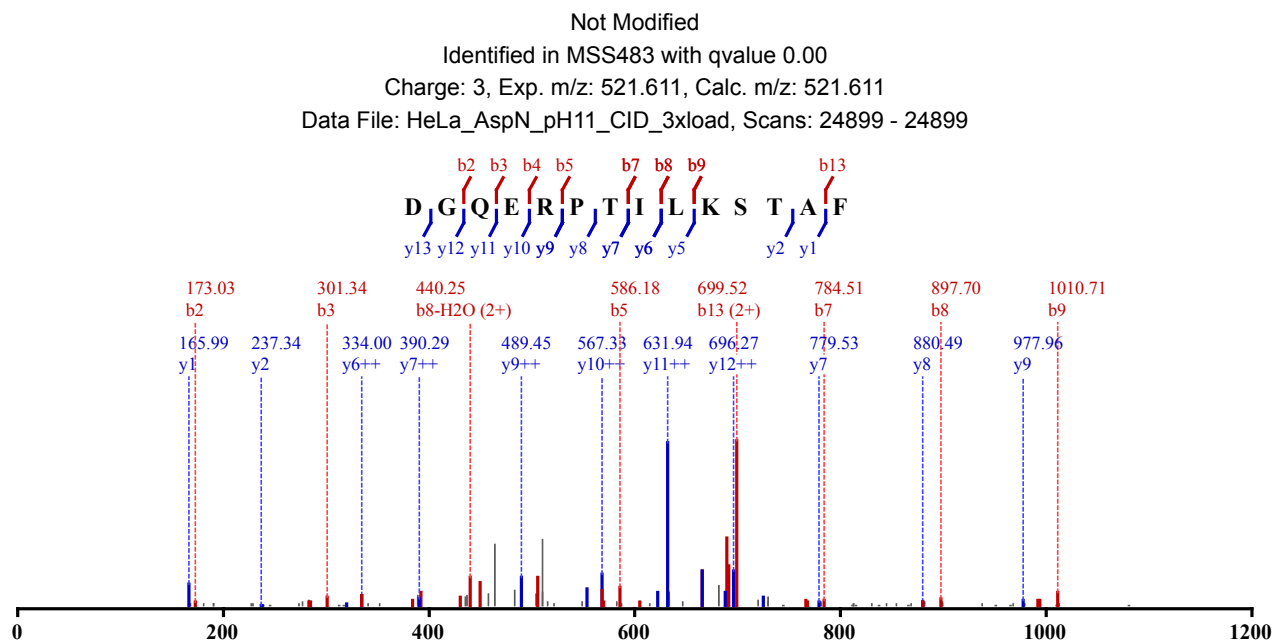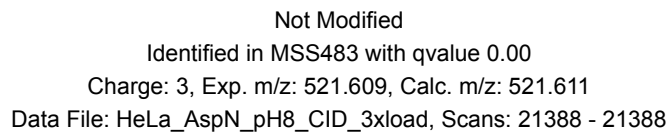

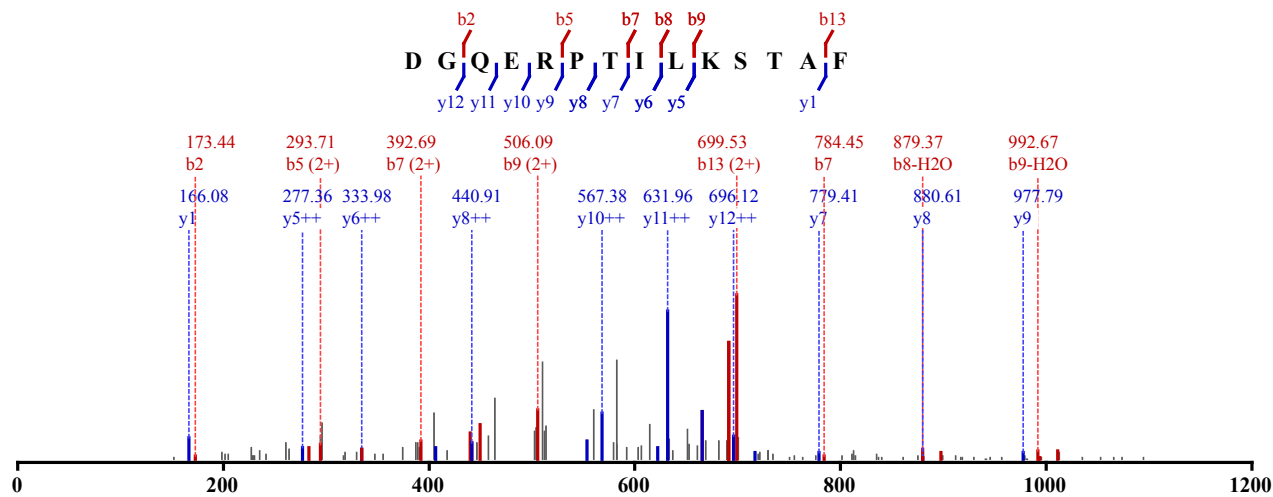

Not Modified

Identified in MSS484 with qvalue 0.00

Charge: 2, Exp. m/z: 629.790, Calc. m/z: 629.792

Data File: HeLa\_Try\_pH4\_HCD\_2, Scans: 31814 - 31814

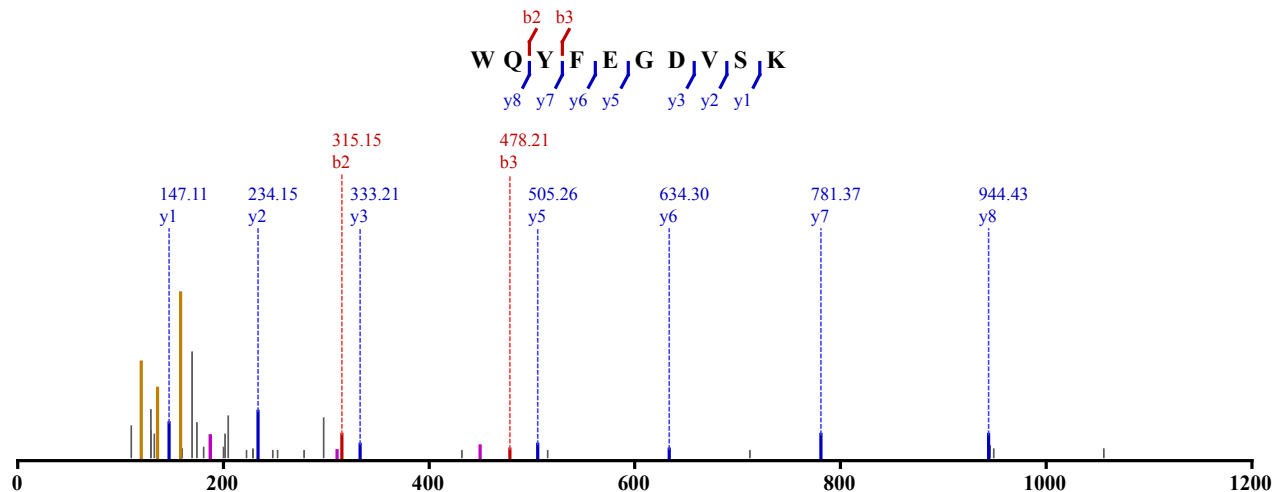

Not Modified

Identified in MSS110 with qvalue 0.01

Charge: 3, Exp. m/z: 465.587, Calc. m/z: 465.584

Data File: HeLa\_LysC-try\_CID\_2, Scans: 26218 - 26218

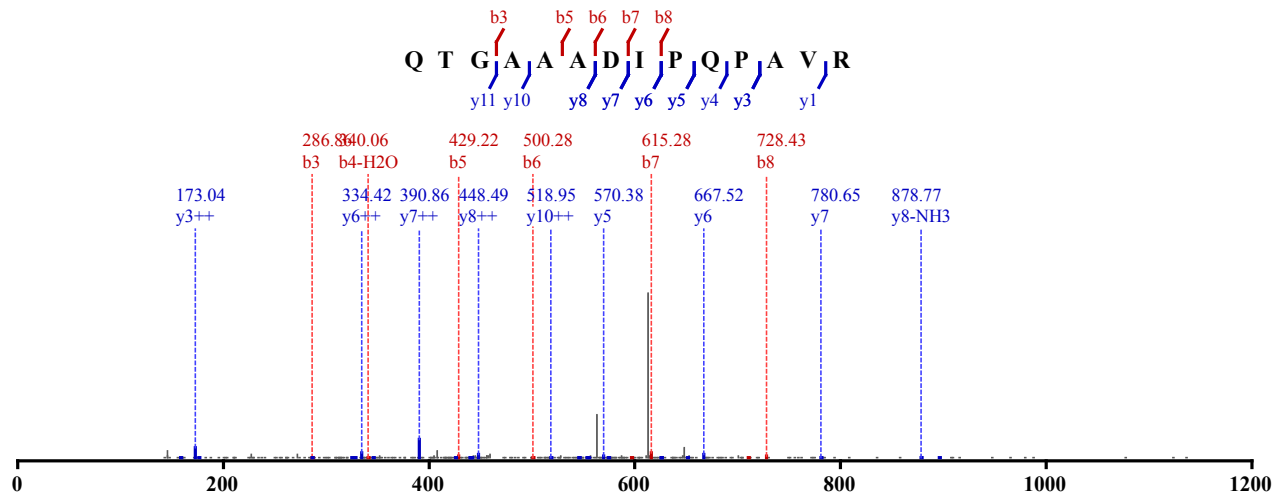

Not Modified

Identified in MSS110 with qvalue 0.01

Charge: 2, Exp. m/z: 697.878, Calc. m/z: 697.872

Data File: HeLa\_LysC-try\_CID\_3, Scans: 28132 - 28132

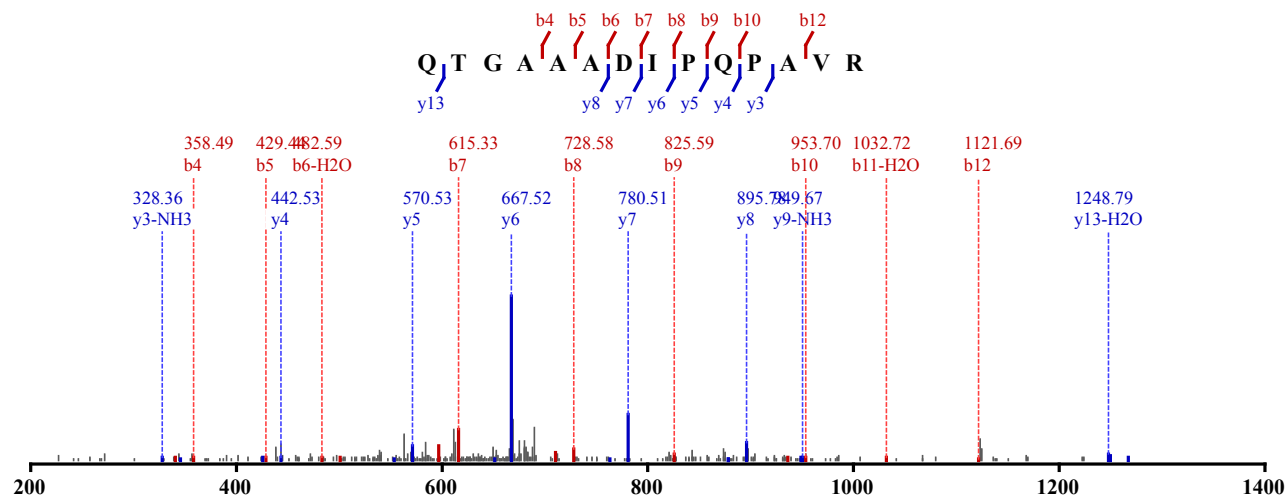

Not Modified

Identified in MSS110 with qvalue 0.00

Charge: 2, Exp. m/z: 697.877, Calc. m/z: 697.872

Data File: HeLa\_LysC-try\_CID\_1, Scans: 26265 - 26265

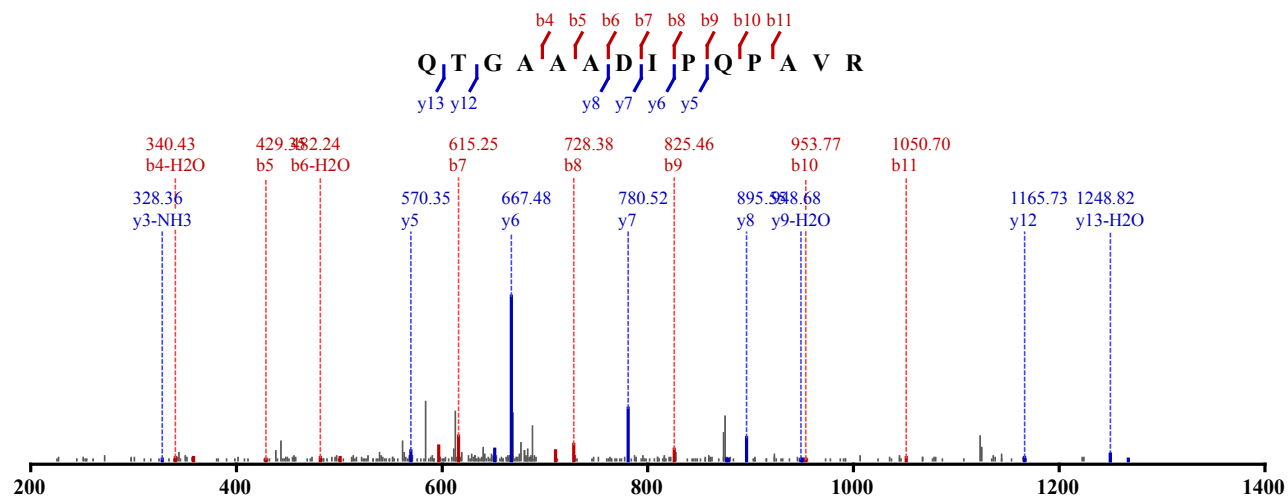

Not Modified

Identified in MSS110 with qvalue 0.00

Charge: 3, Exp. m/z: 465.587, Calc. m/z: 465.584

Data File: HeLa\_LysC-try\_CID\_1, Scans: 26369 - 26369

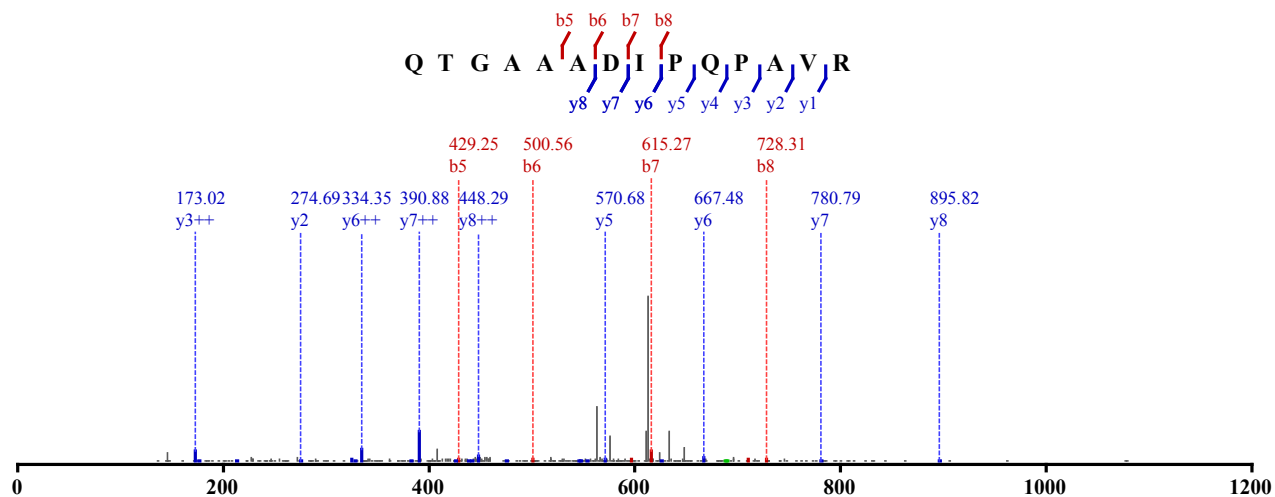

Not Modified

Identified in MSS110 with qvalue 0.00  
 Charge: 2, Exp. m/z: 697.878, Calc. m/z: 697.872  
 Data File: HeLa\_LysC-try\_CID\_2, Scans: 26070 - 26070

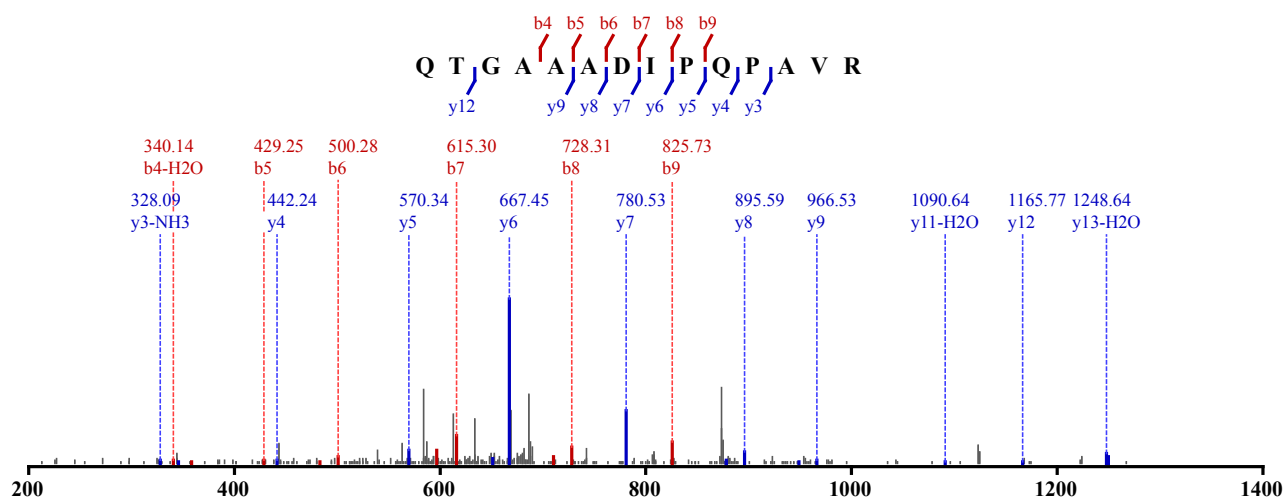

Not Modified  
 Identified in MSS122 with qvalue 0.01  
 Charge: 3, Exp. m/z: 465.590, Calc. m/z: 465.584  
 Data File: HeLa\_try\_HCD\_1, Scans: 25318 - 25318

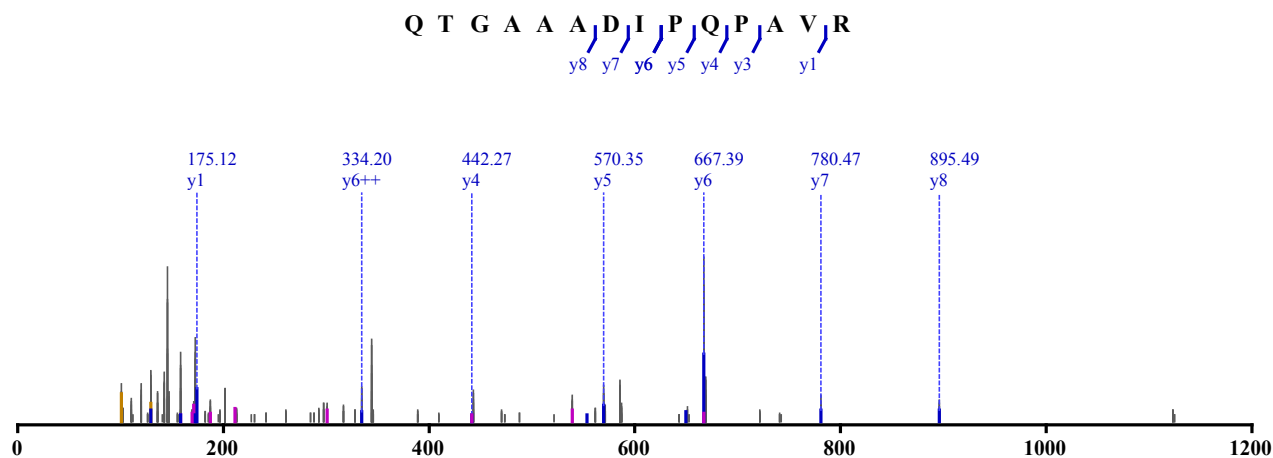

Not Modified  
 Identified in MSS122 with qvalue 0.01  
 Charge: 3, Exp. m/z: 465.589, Calc. m/z: 465.584  
 Data File: HeLa\_try\_HCD\_1, Scans: 25874 - 25874

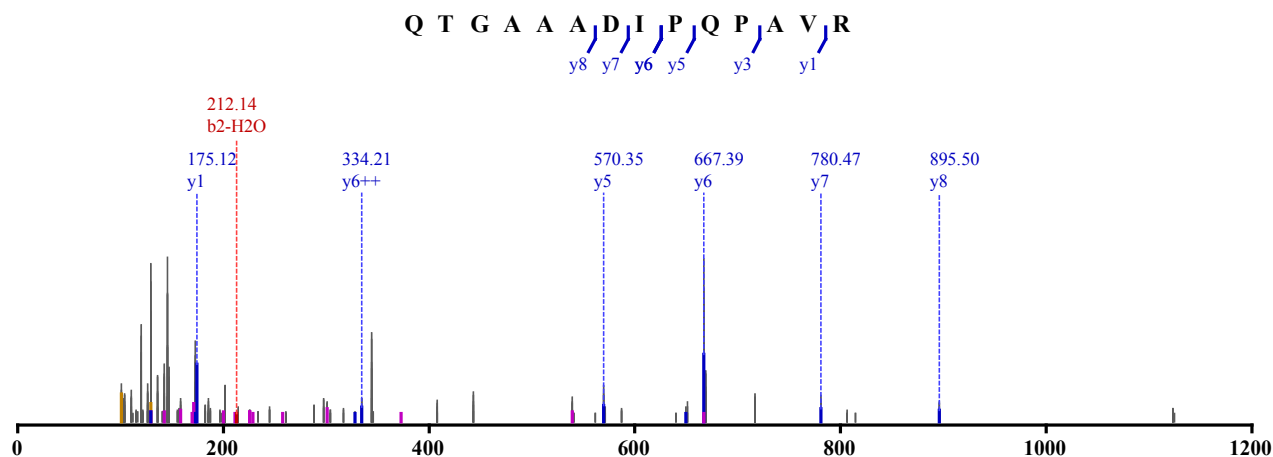

Not Modified

Identified in MSS122 with qvalue 0.00

Charge: 3, Exp. m/z: 465.585, Calc. m/z: 465.584

Data File: HeLa\_try\_HCD\_1, Scans: 25479 - 25479

Q T G A A A D I P Q P A V R  
 y8 y7 y6 y5 y3 y1

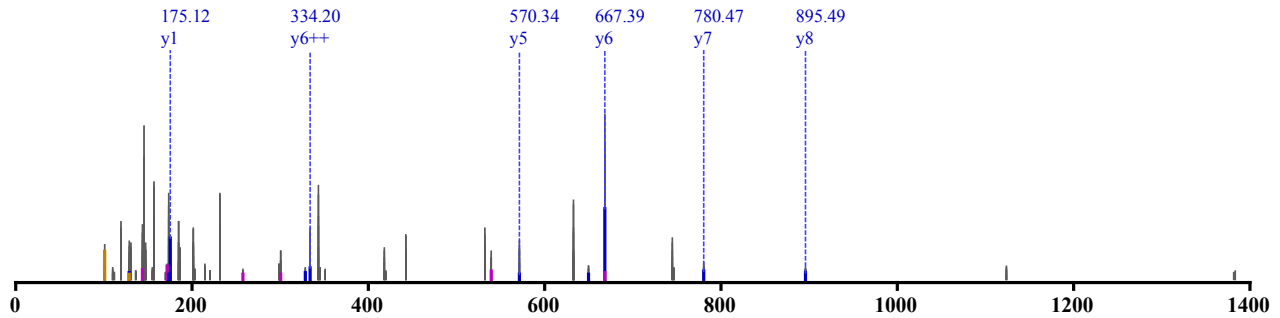

Not Modified

Identified in MSS130 with qvalue 0.00

Charge: 3, Exp. m/z: 465.587, Calc. m/z: 465.584

Data File: HeLa\_LysC-try\_HCD\_1, Scans: 21754 - 21754

Q T G A A A D I P Q P A V R  
 y8 y7 y6 y5 y4 y3 y1  
 b5

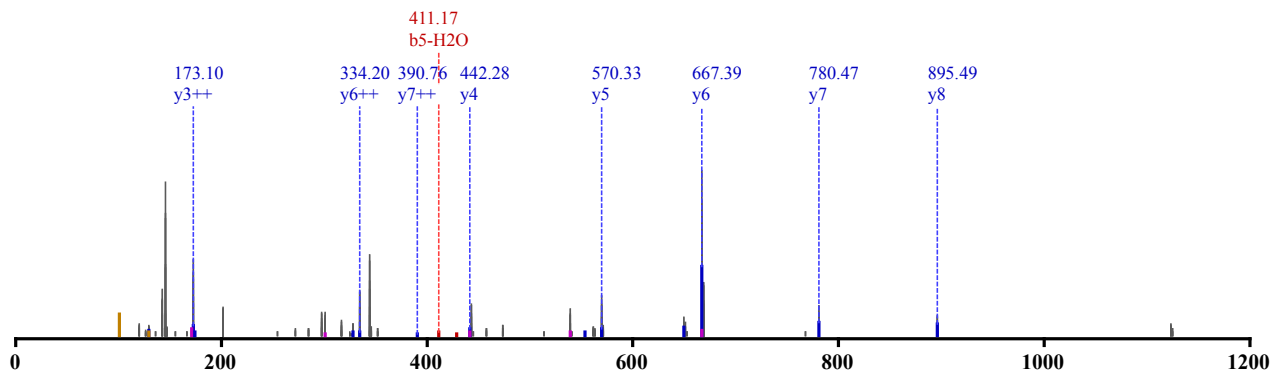

Not Modified

Identified in MSS130 with qvalue 0.00

Charge: 3, Exp. m/z: 465.587, Calc. m/z: 465.584

Data File: HeLa\_LysC-try\_HCD\_1, Scans: 21151 - 21151

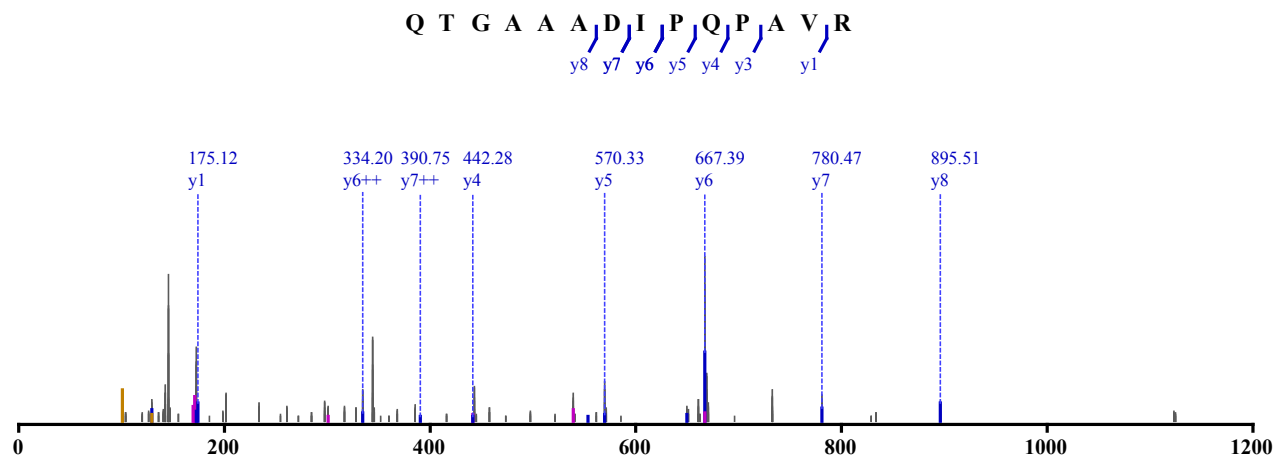

Not Modified

Identified in MSS130 with qvalue 0.00

Charge: 3, Exp. m/z: 465.586, Calc. m/z: 465.584

Data File: HeLa\_LysC-try\_HCD\_1, Scans: 21949 - 21949

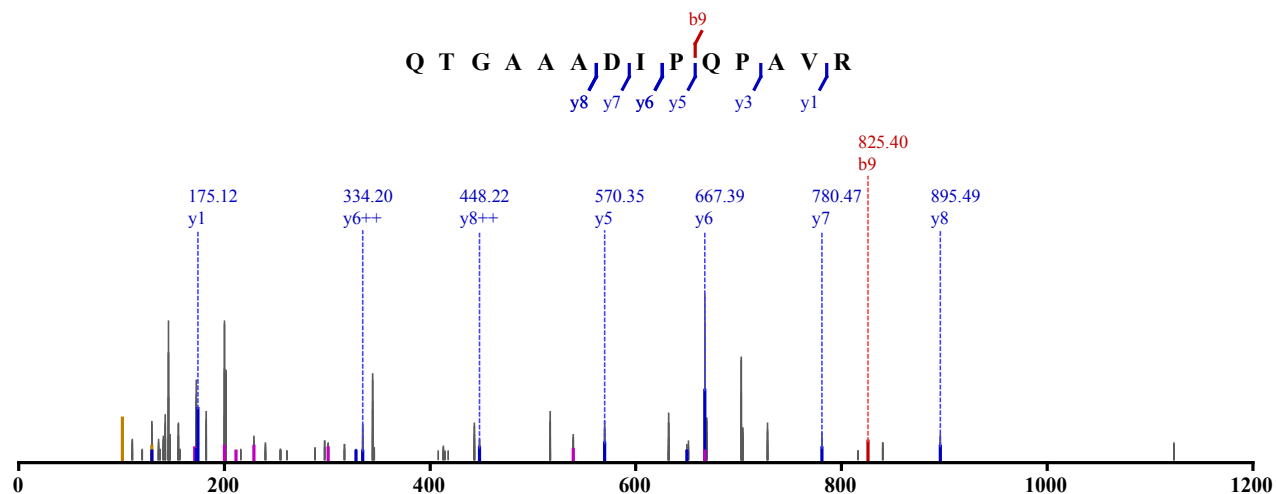

Not Modified

Identified in MSS130 with qvalue 0.00

Charge: 3, Exp. m/z: 465.586, Calc. m/z: 465.584

Data File: HeLa\_LysC-try\_HCD\_1, Scans: 21450 - 21450

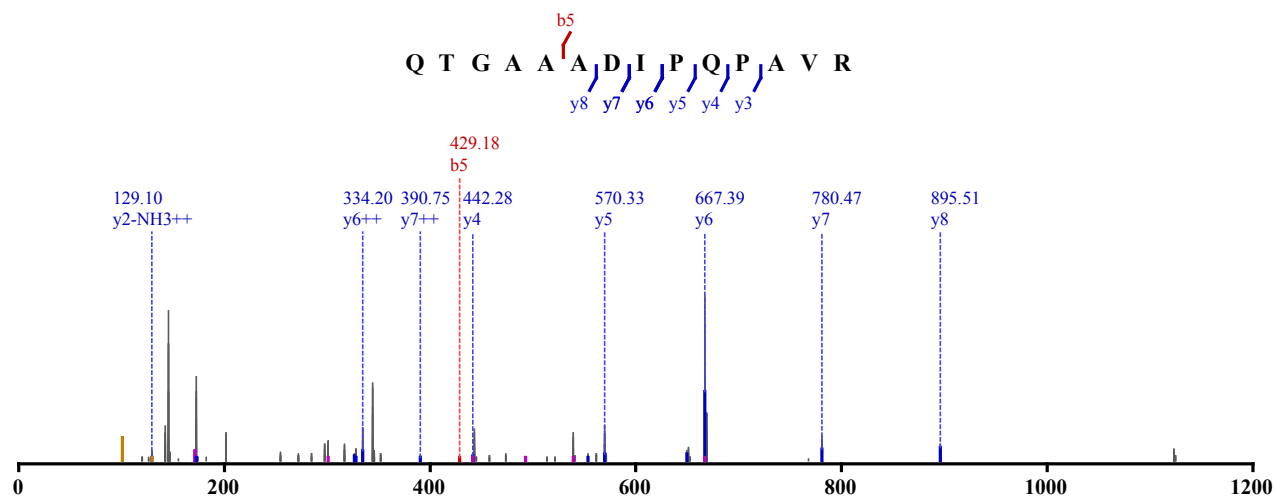

Not Modified

Identified in MSS130 with qvalue 0.00

Charge: 3, Exp. m/z: 465.587, Calc. m/z: 465.584



Data File: HeLa\_LysC-try\_HCD\_1, Scans: 21593 - 21593

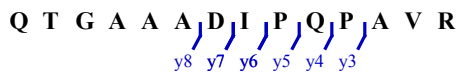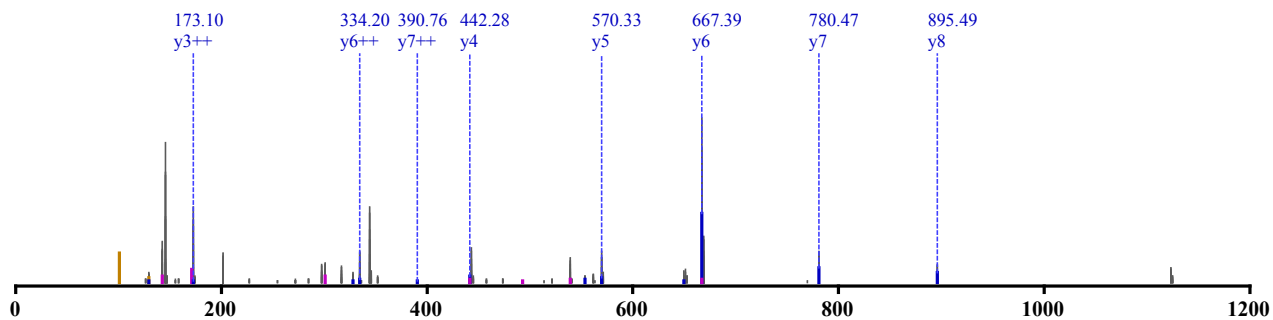

Not Modified

Identified in MSS130 with qvalue 0.00

Charge: 2, Exp. m/z: 697.875, Calc. m/z: 697.872

Data File: HeLa\_LysC-try\_HCD\_1, Scans: 21224 - 21224

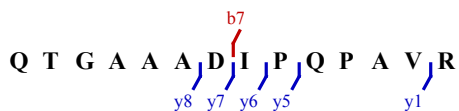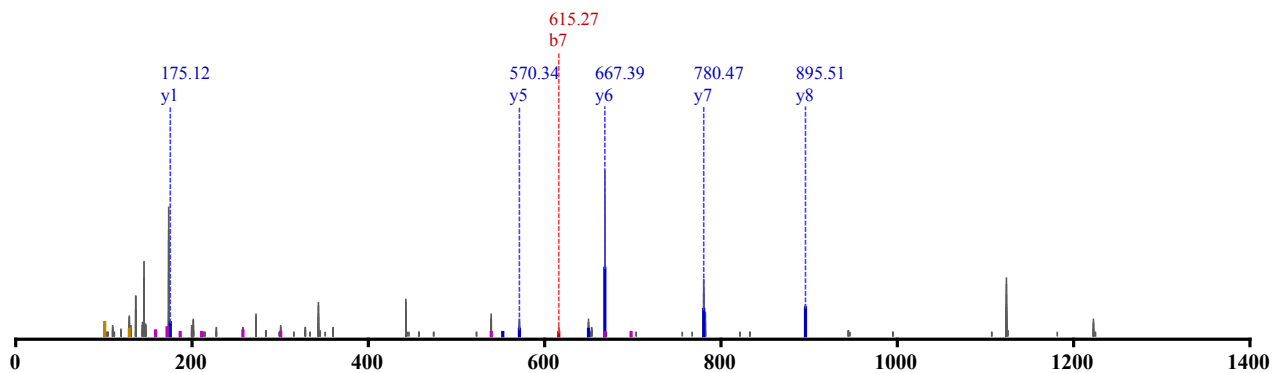

Not Modified

Identified in MSS130 with qvalue 0.00

Charge: 3, Exp. m/z: 465.587, Calc. m/z: 465.584

Data File: HeLa\_LysC-try\_HCD\_1, Scans: 21303 - 21303

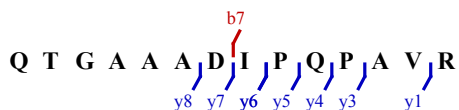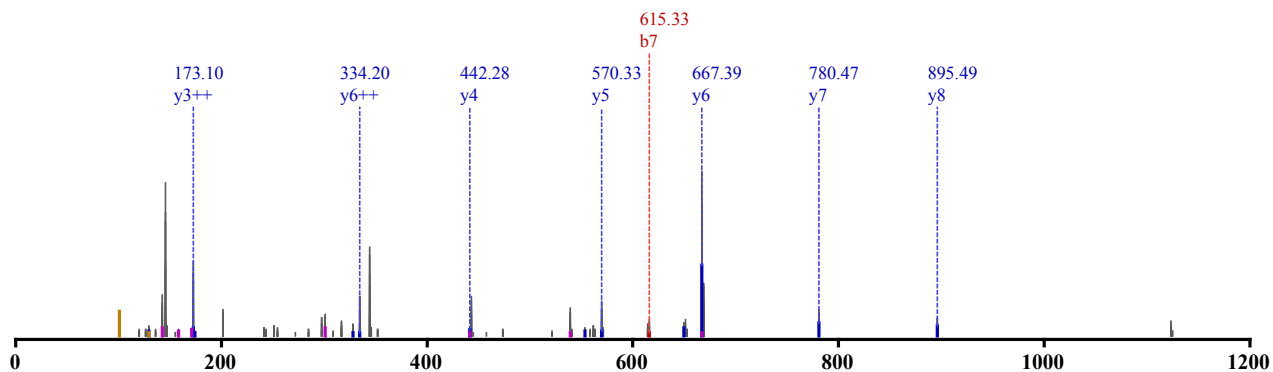

Not Modified

Identified in MSS130 with qvalue 0.00  
 Charge: 3, Exp. m/z: 465.587, Calc. m/z: 465.584  
 Data File: HeLa\_LysC-try\_HCD\_2, Scans: 28540 - 28540

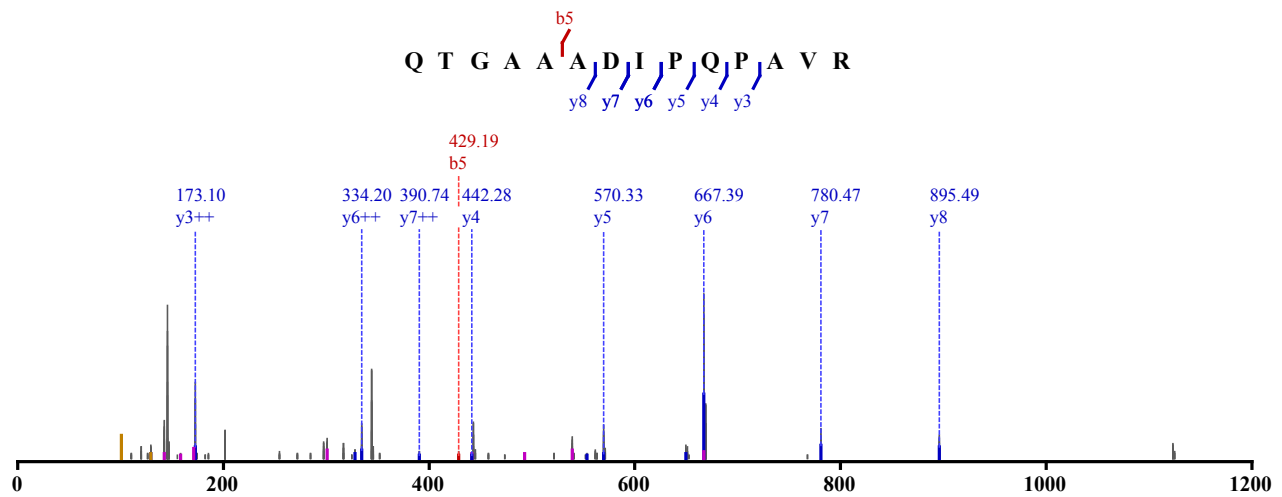

Not Modified  
 Identified in MSS130 with qvalue 0.01  
 Charge: 3, Exp. m/z: 465.587, Calc. m/z: 465.584  
 Data File: HeLa\_LysC-try\_HCD\_2, Scans: 29010 - 29010

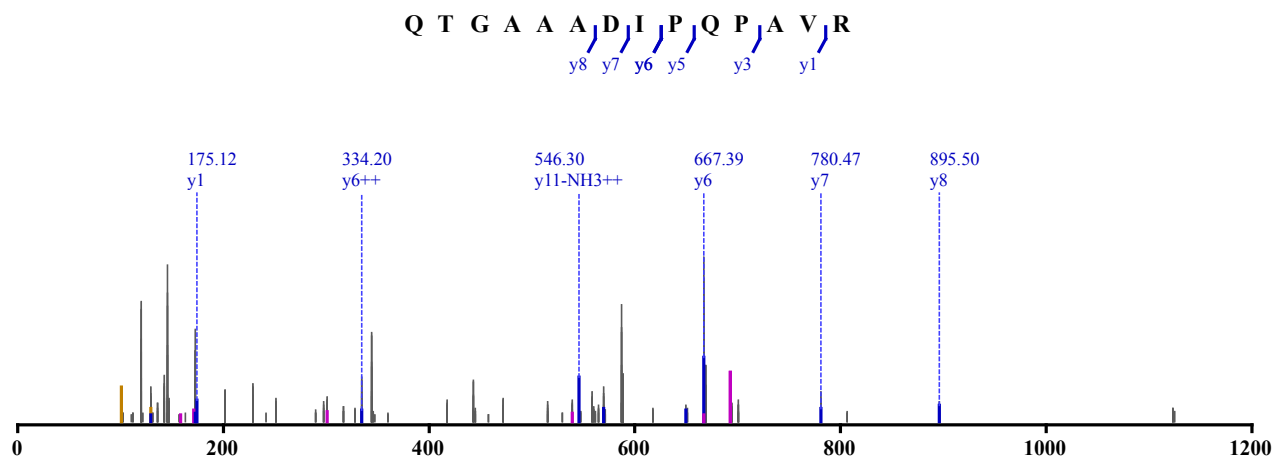

Not Modified  
 Identified in MSS130 with qvalue 0.00  
 Charge: 3, Exp. m/z: 465.586, Calc. m/z: 465.584  
 Data File: HeLa\_LysC-try\_HCD\_2, Scans: 28382 - 28382

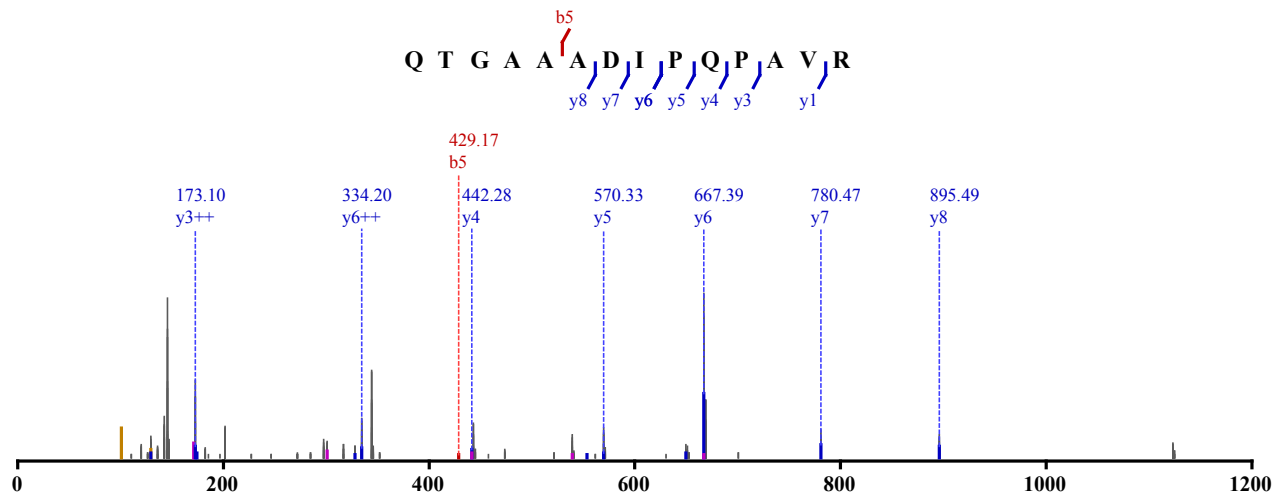

Not Modified

Identified in MSS130 with qvalue 0.00

Charge: 3, Exp. m/z: 465.587, Calc. m/z: 465.584

Data File: HeLa\_LysC-try\_HCD\_2, Scans: 27768 - 27768

Q T G A A A D I P Q P A V R  
 y8 y7 y6 y5 y4 y3 y1

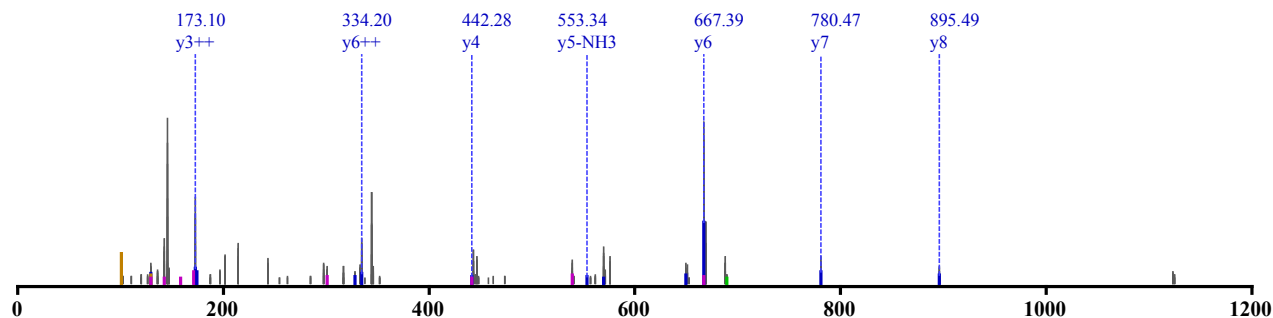

Not Modified

Identified in MSS130 with qvalue 0.00

Charge: 3, Exp. m/z: 465.588, Calc. m/z: 465.584

Data File: HeLa\_LysC-try\_HCD\_2, Scans: 29300 - 29300

Q T G A A A D I P Q P A V R  
 y8 y7 y6 y5 y4 y3 y1  
 b5

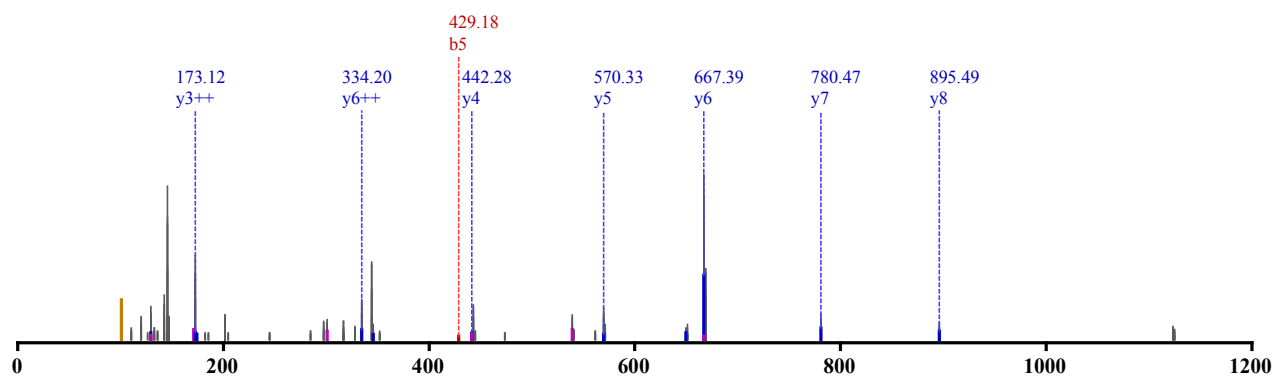

Not Modified

Identified in MSS130 with qvalue 0.01

Charge: 2, Exp. m/z: 697.876, Calc. m/z: 697.872

Data File: HeLa\_LysC-try\_HCD\_2, Scans: 28964 - 28964

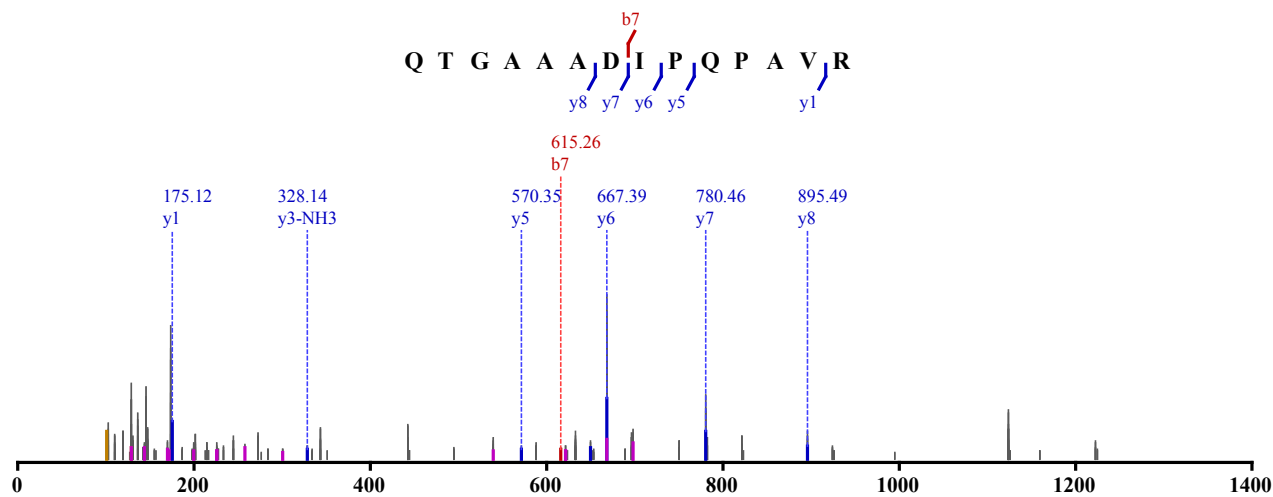

Not Modified

Identified in MSS130 with qvalue 0.00

Charge: 3, Exp. m/z: 465.587, Calc. m/z: 465.584

Data File: HeLa\_LysC-try\_HCD\_3, Scans: 27162 - 27162

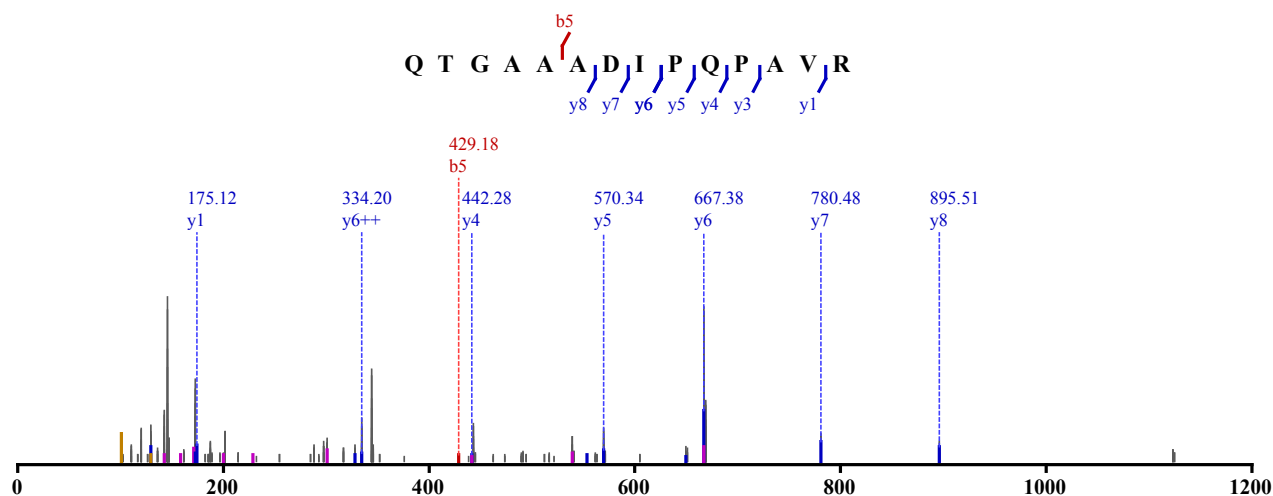

Not Modified

Identified in MSS130 with qvalue 0.01

Charge: 2, Exp. m/z: 697.876, Calc. m/z: 697.872

Data File: HeLa\_LysC-try\_HCD\_3, Scans: 28458 - 28458

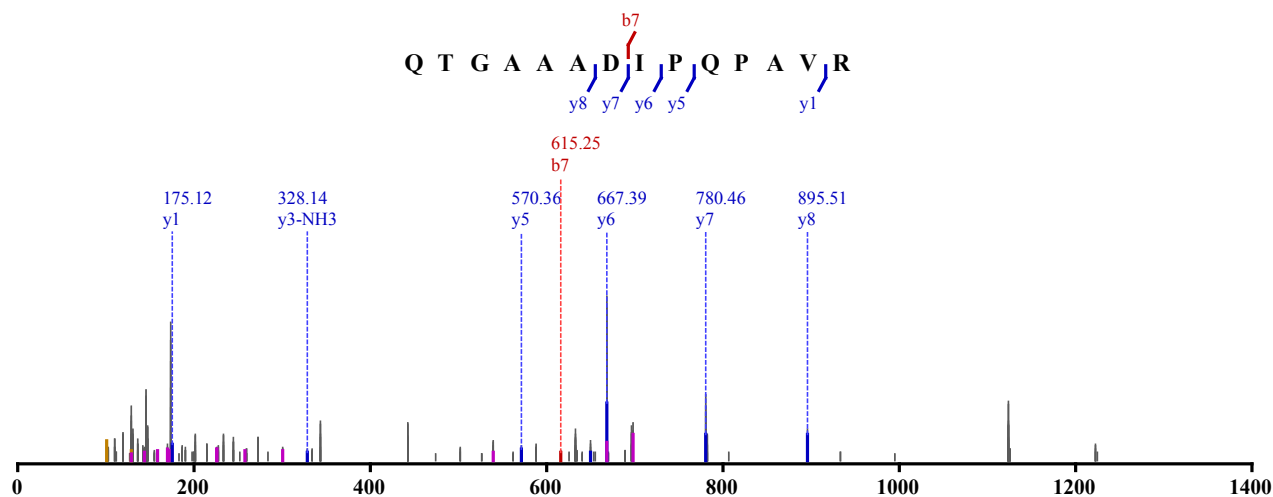

Not Modified

Identified in MSS130 with qvalue 0.00

Charge: 3, Exp. m/z: 465.588, Calc. m/z: 465.584

Data File: HeLa\_LysC-try\_HCD\_2, Scans: 27919 - 27919

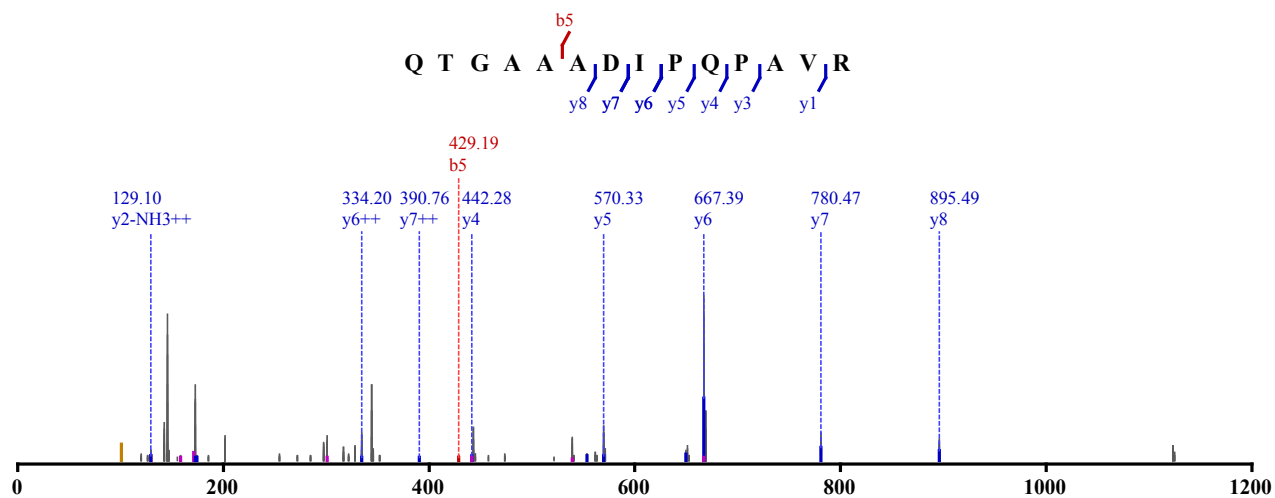

Not Modified

Identified in MSS130 with qvalue 0.00

Charge: 3, Exp. m/z: 465.586, Calc. m/z: 465.584

Data File: HeLa\_LysC-try\_HCD\_2, Scans: 28232 - 28232

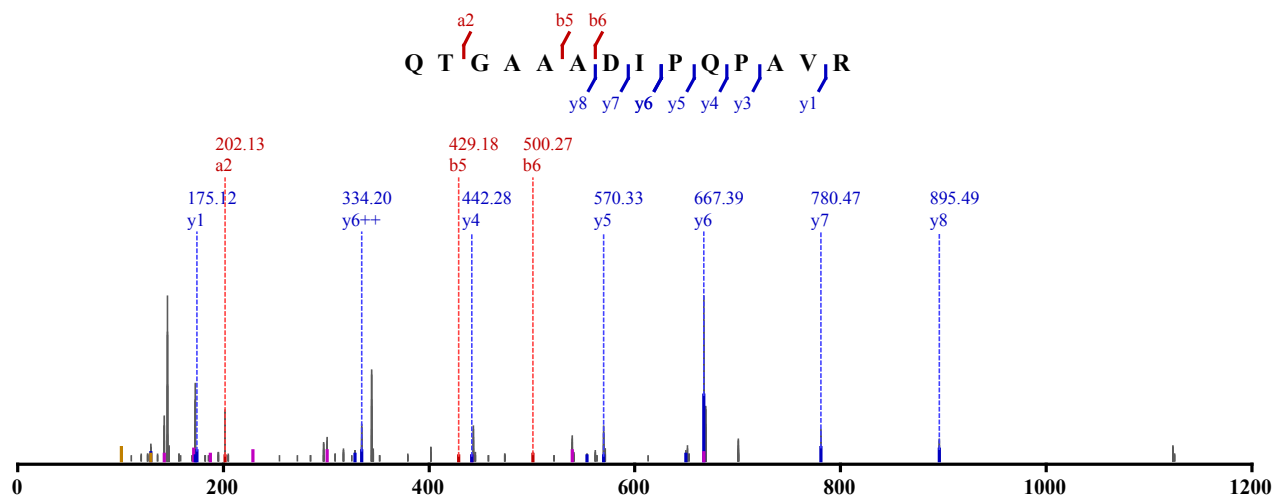

Not Modified

Identified in MSS130 with qvalue 0.00

Charge: 3, Exp. m/z: 465.586, Calc. m/z: 465.584

Data File: HeLa\_LysC-try\_HCD\_3, Scans: 27933 - 27933

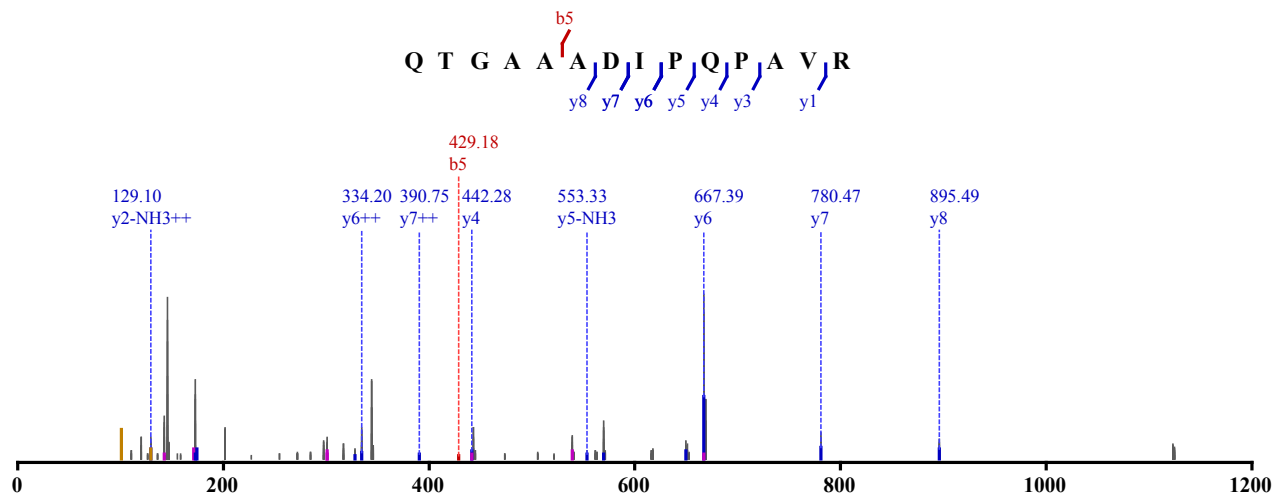

Not Modified

Identified in MSS130 with qvalue 0.00  
 Charge: 3, Exp. m/z: 465.586, Calc. m/z: 465.584  
 Data File: HeLa\_LysC-try\_HCD\_3, Scans: 27478 - 27478

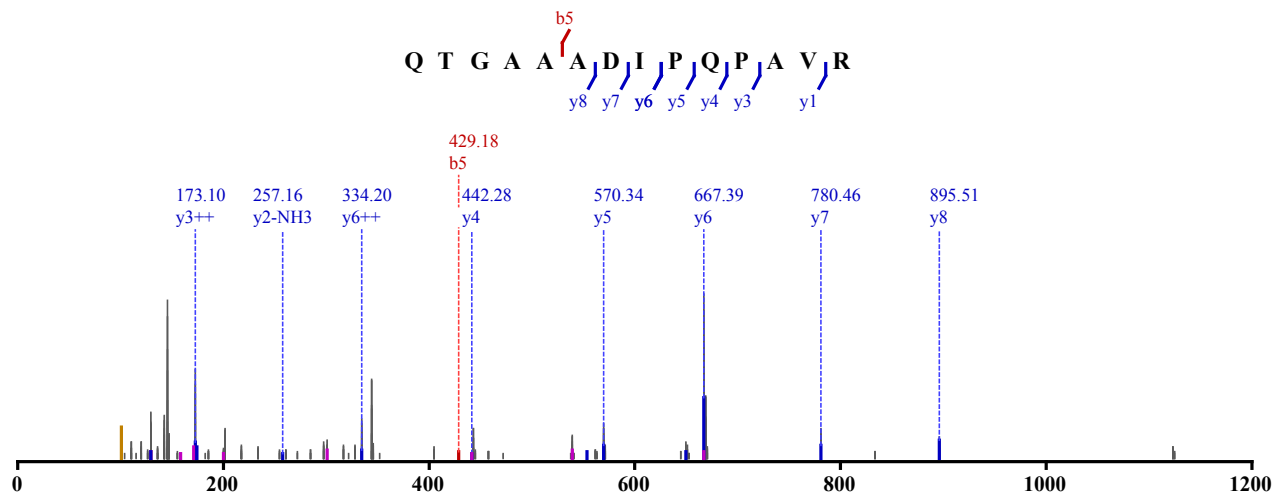

Not Modified  
 Identified in MSS130 with qvalue 0.00  
 Charge: 3, Exp. m/z: 465.586, Calc. m/z: 465.584  
 Data File: HeLa\_LysC-try\_HCD\_3, Scans: 27623 - 27623

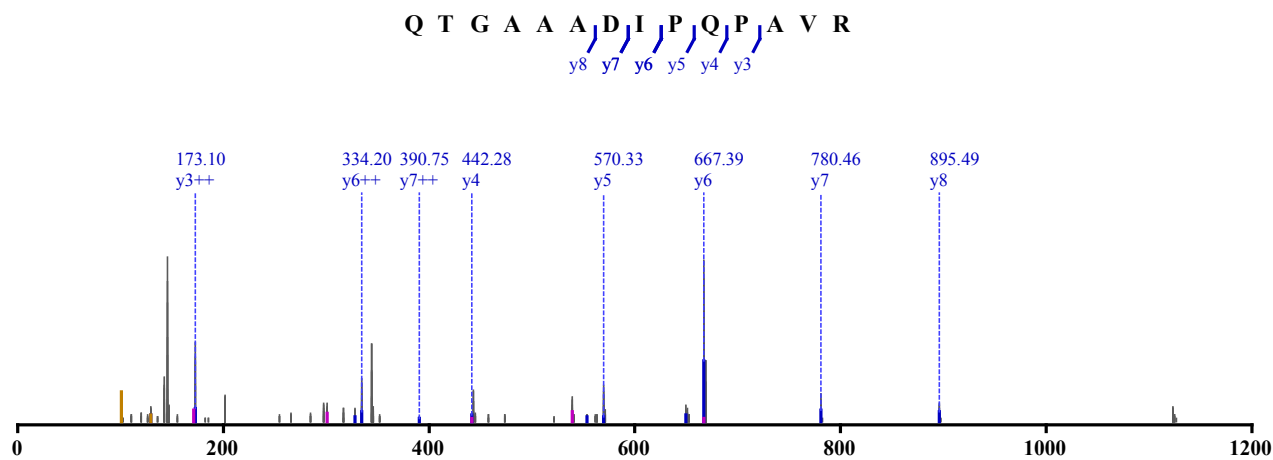

Not Modified  
 Identified in MSS130 with qvalue 0.01  
 Charge: 2, Exp. m/z: 697.876, Calc. m/z: 697.872  
 Data File: HeLa\_LysC-try\_HCD\_3, Scans: 28295 - 28295

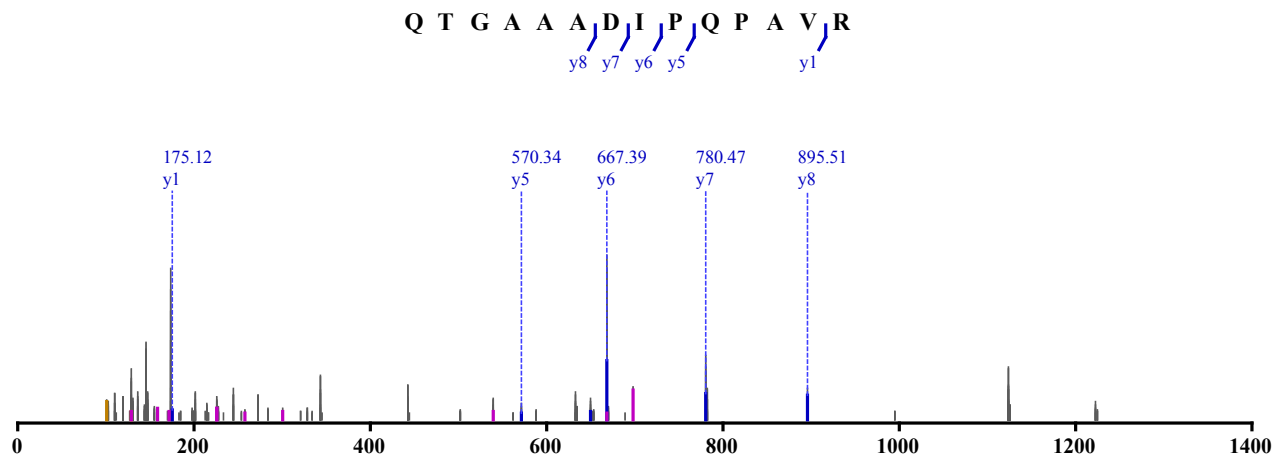

Not Modified

Identified in MSS130 with qvalue 0.00

Charge: 3, Exp. m/z: 465.586, Calc. m/z: 465.584

Data File: HeLa\_LysC-try\_HCD\_3, Scans: 27762 - 27762

Q T G A A A D I P Q P A V R  
 y8 y7 y6 y5 y4 y3 y1

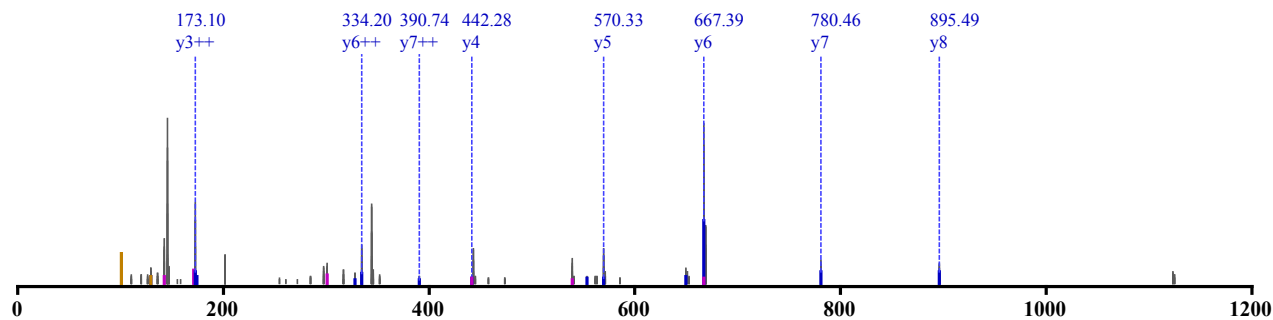

Not Modified

Identified in MSS130 with qvalue 0.00

Charge: 3, Exp. m/z: 465.586, Calc. m/z: 465.584

Data File: HeLa\_LysC-try\_HCD\_3, Scans: 28086 - 28086

Q T G A A A D I P Q P A V R  
 y8 y7 y6 y5 y4 y3 y1

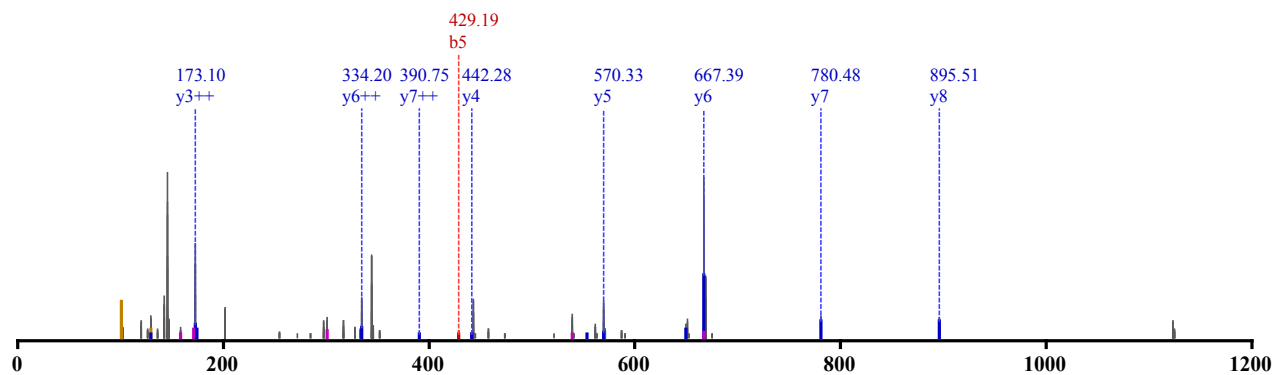

Not Modified

Identified in MSS130 with qvalue 0.00

Charge: 3, Exp. m/z: 465.587, Calc. m/z: 465.584

Data File: HeLa\_LysC-try\_HCD\_1, Scans: 20976 - 20976

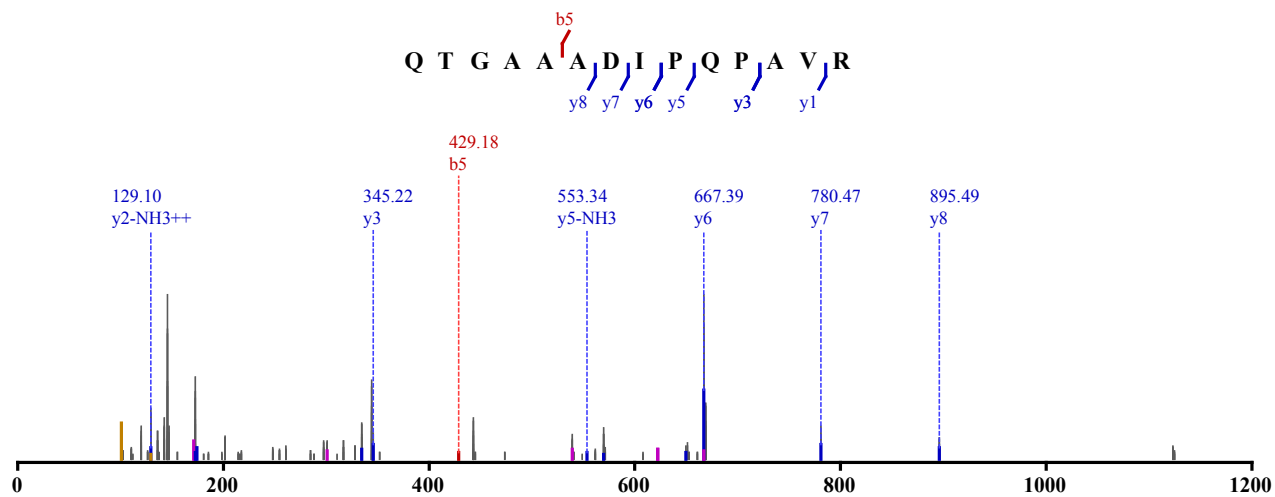

Not Modified

Identified in MSS130 with qvalue 0.01

Charge: 2, Exp. m/z: 697.876, Calc. m/z: 697.872

Data File: HeLa\_LysC-try\_HCD\_1, Scans: 21893 - 21893

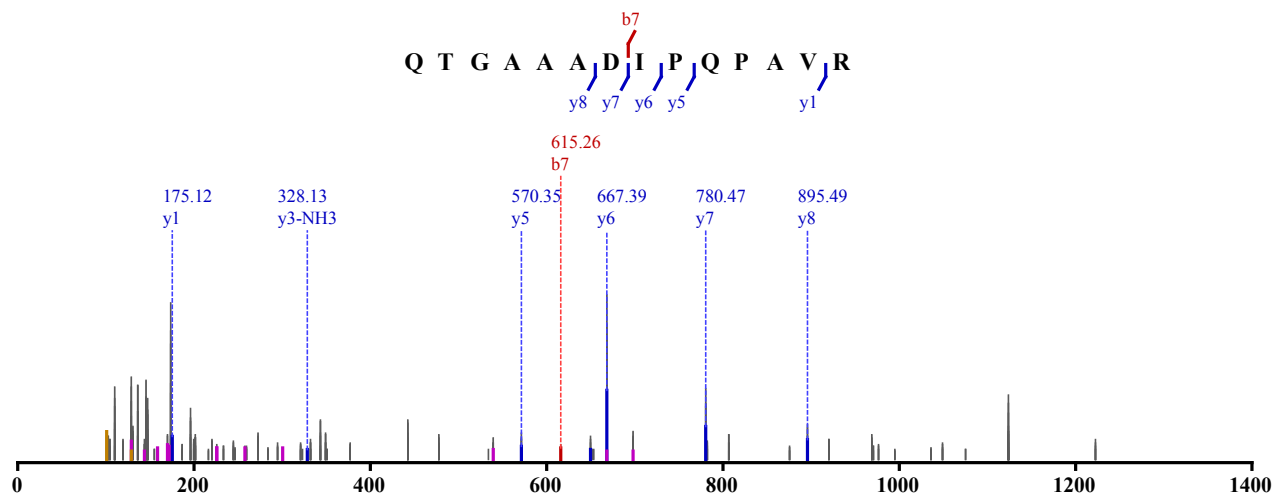

Not Modified

Identified in MSS130 with qvalue 0.00

Charge: 3, Exp. m/z: 465.587, Calc. m/z: 465.584

Data File: HeLa\_LysC-try\_HCD\_2, Scans: 28709 - 28709

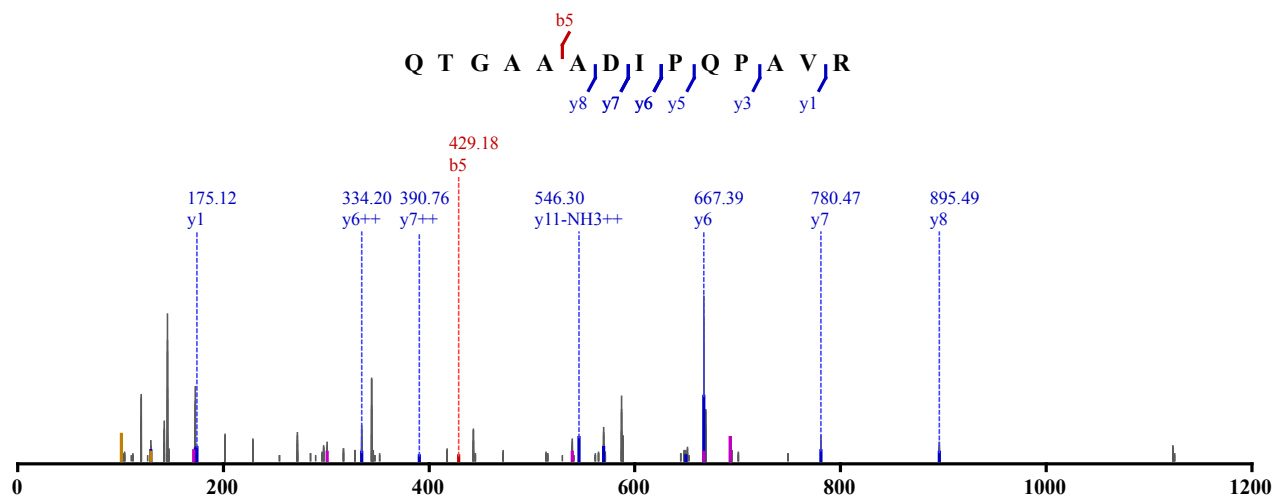

Not Modified

Identified in MSS130 with qvalue 0.00

Charge: 2, Exp. m/z: 697.876, Calc. m/z: 697.872



Data File: HeLa\_LysC-try\_HCD\_2, Scans: 28372 - 28372

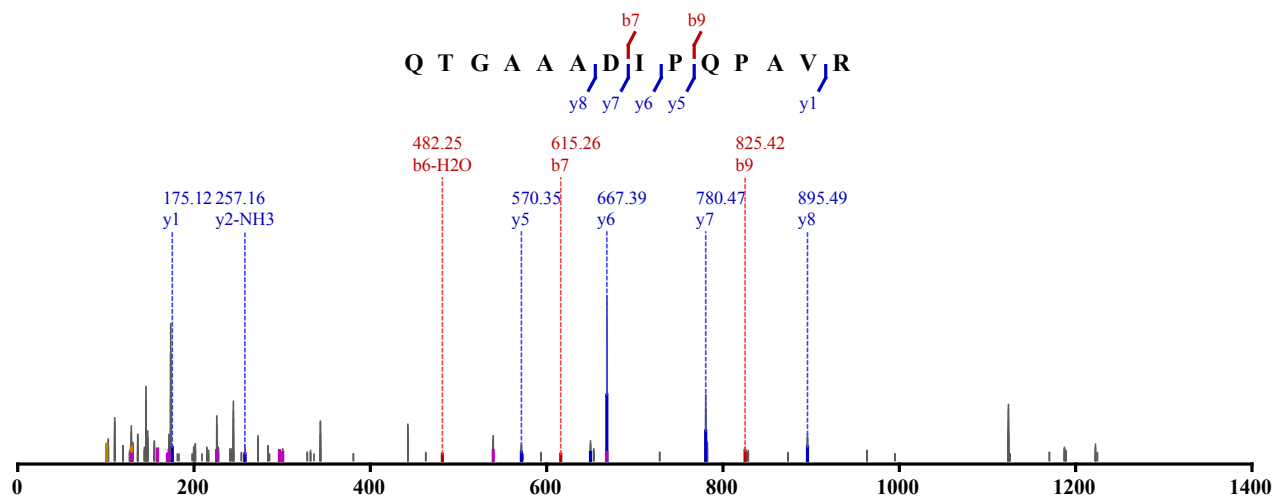

Not Modified

Identified in MSS130 with qvalue 0.00

Charge: 3, Exp. m/z: 465.587, Calc. m/z: 465.584

Data File: HeLa\_LysC-try\_HCD\_2, Scans: 27400 - 27400

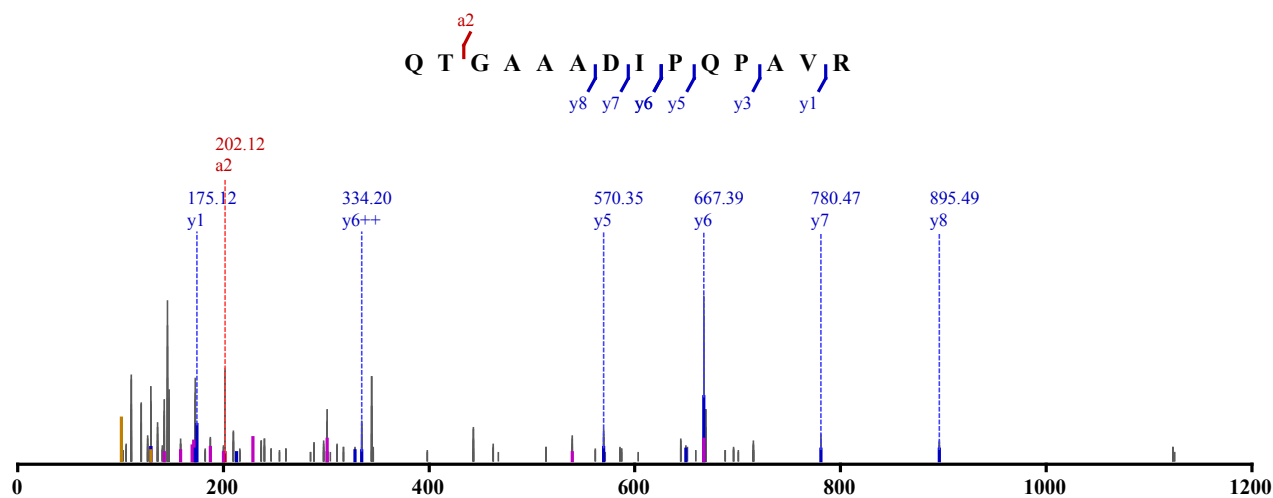

Not Modified

Identified in MSS130 with qvalue 0.00

Charge: 3, Exp. m/z: 465.587, Calc. m/z: 465.584

Data File: HeLa\_LysC-try\_HCD\_2, Scans: 29455 - 29455

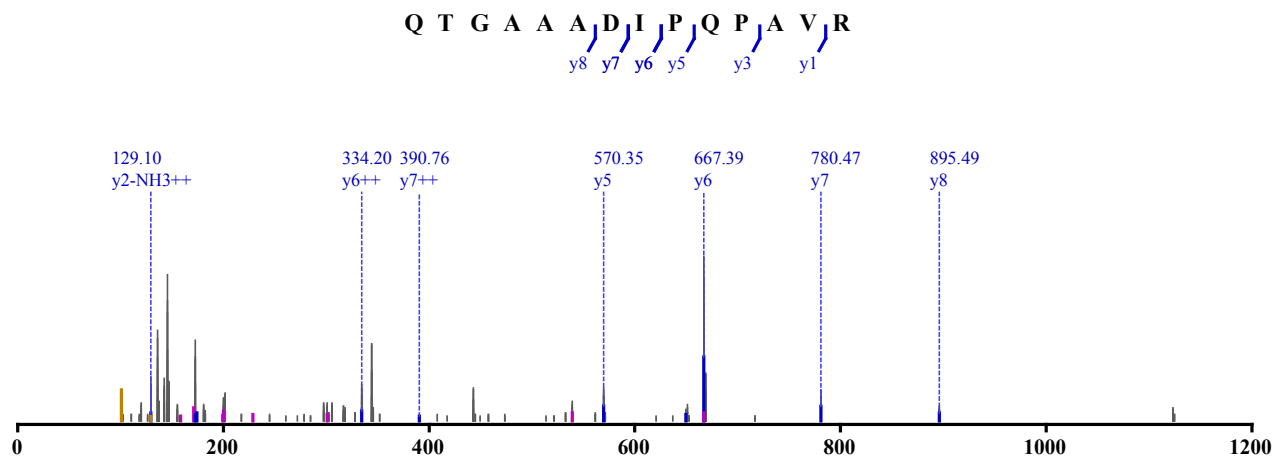

Not Modified

Identified in MSS130 with qvalue 0.00  
 Charge: 3, Exp. m/z: 465.587, Calc. m/z: 465.584  
 Data File: HeLa\_LysC-try\_HCD\_2, Scans: 27608 - 27608

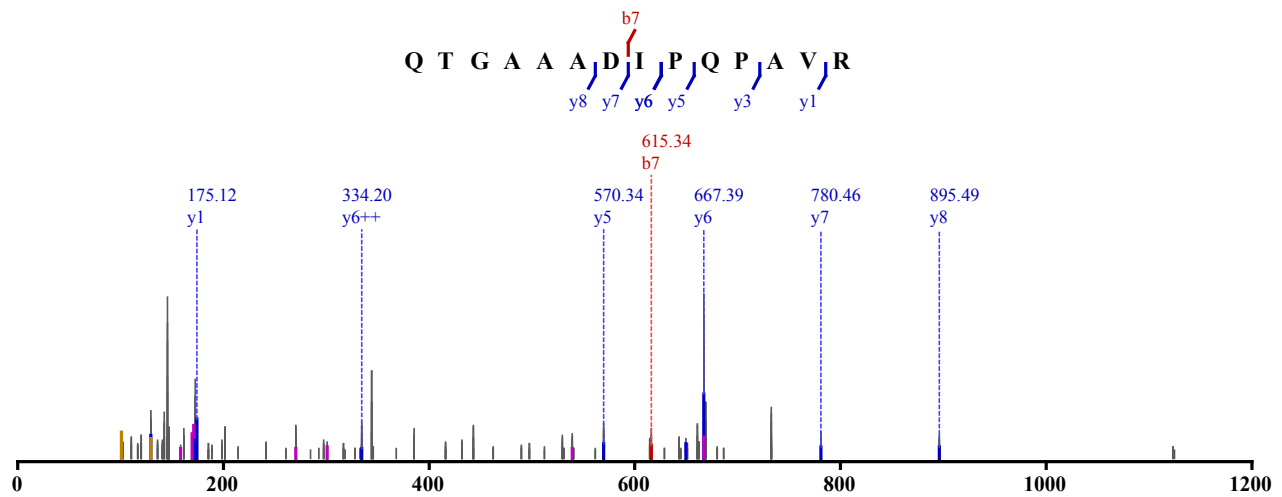

Not Modified  
 Identified in MSS130 with qvalue 0.00  
 Charge: 3, Exp. m/z: 465.587, Calc. m/z: 465.584  
 Data File: HeLa\_LysC-try\_HCD\_2, Scans: 28073 - 28073

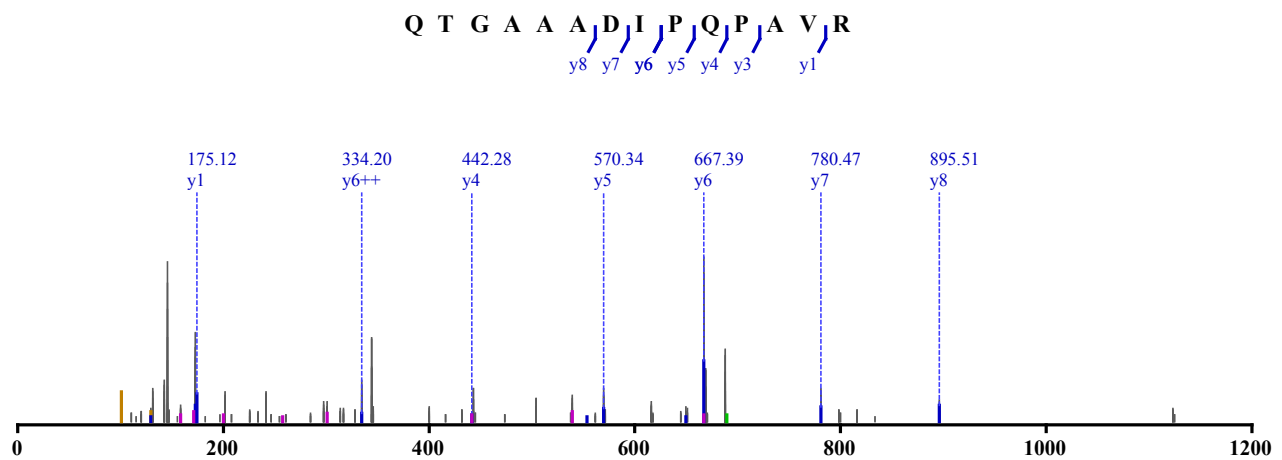

Not Modified  
 Identified in MSS130 with qvalue 0.00  
 Charge: 3, Exp. m/z: 465.587, Calc. m/z: 465.584  
 Data File: HeLa\_LysC-try\_HCD\_3, Scans: 28720 - 28720

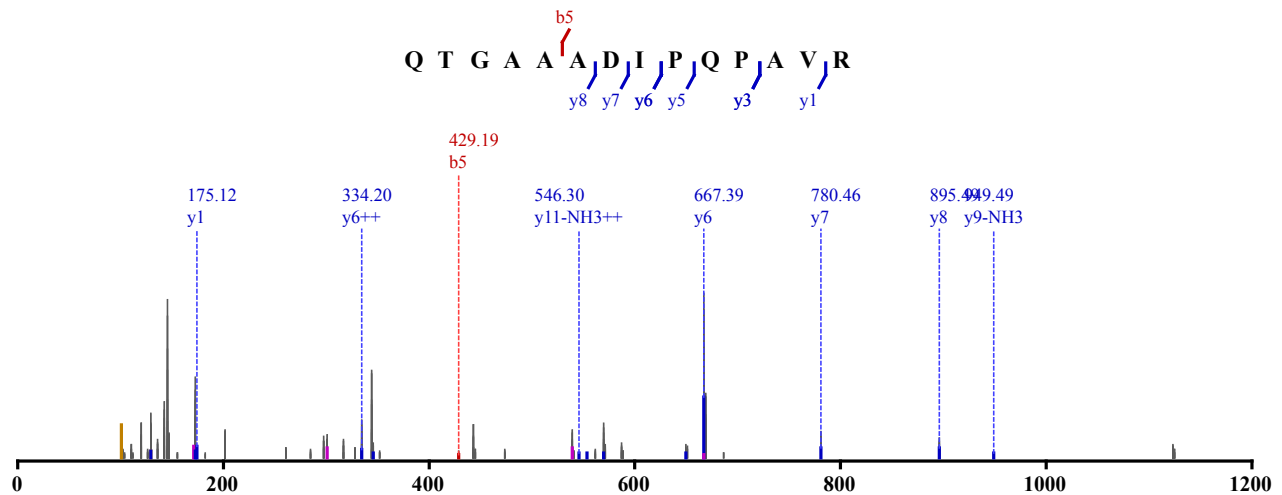

Not Modified

Identified in MSS130 with qvalue 0.00

Charge: 3, Exp. m/z: 465.587, Calc. m/z: 465.584

Data File: HeLa\_LysC-try\_HCD\_3, Scans: 27321 - 27321

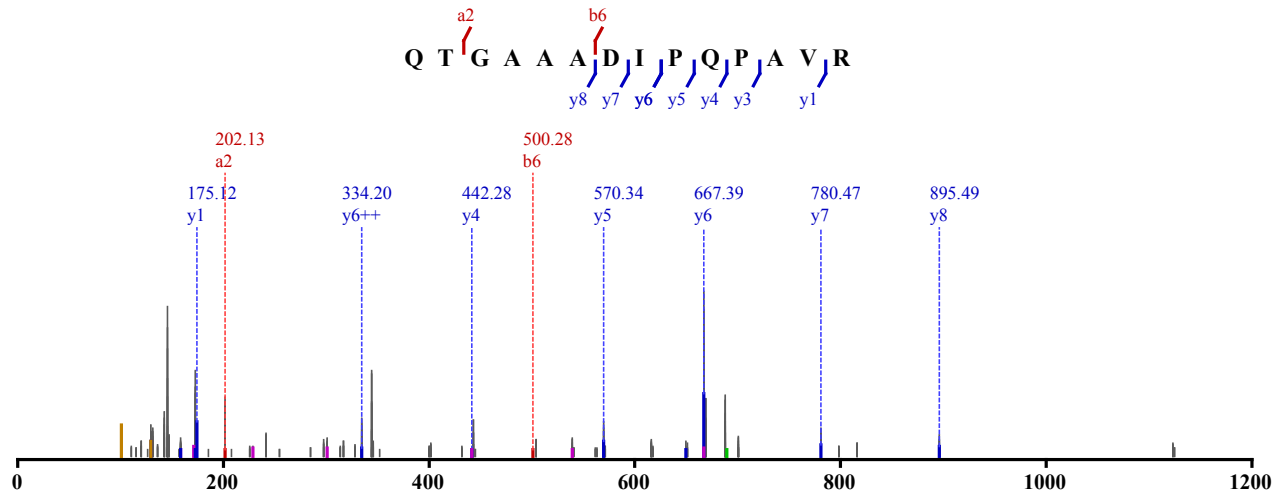

Not Modified

Identified in MSS130 with qvalue 0.00

Charge: 3, Exp. m/z: 465.586, Calc. m/z: 465.584

Data File: HeLa\_LysC-try\_HCD\_3, Scans: 27016 - 27016

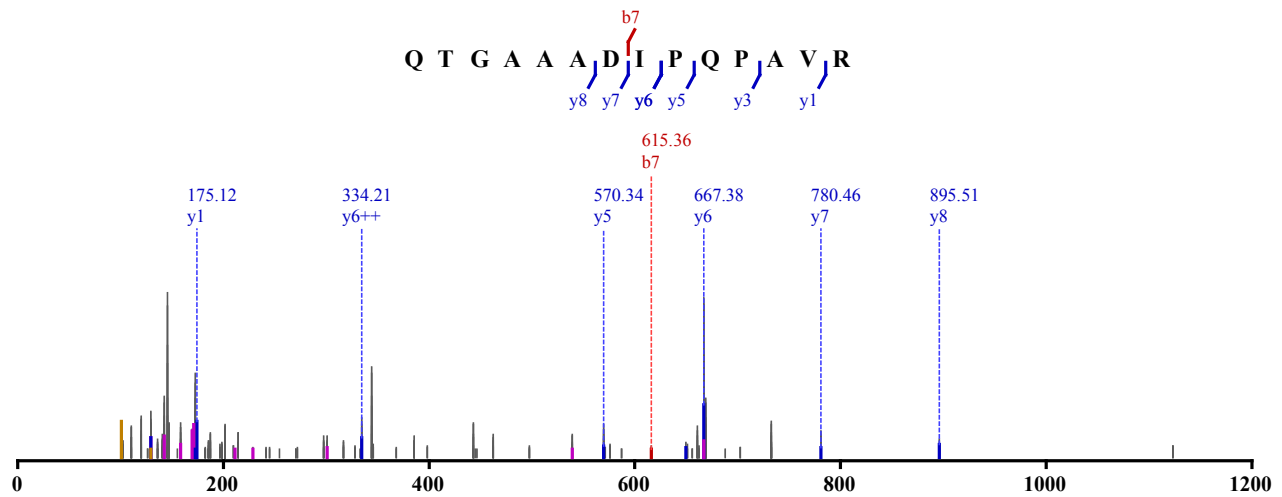

Not Modified

Identified in MSS130 with qvalue 0.00

Charge: 2, Exp. m/z: 697.876, Calc. m/z: 697.872

Data File: HeLa\_LysC-try\_HCD\_3, Scans: 27898 - 27898

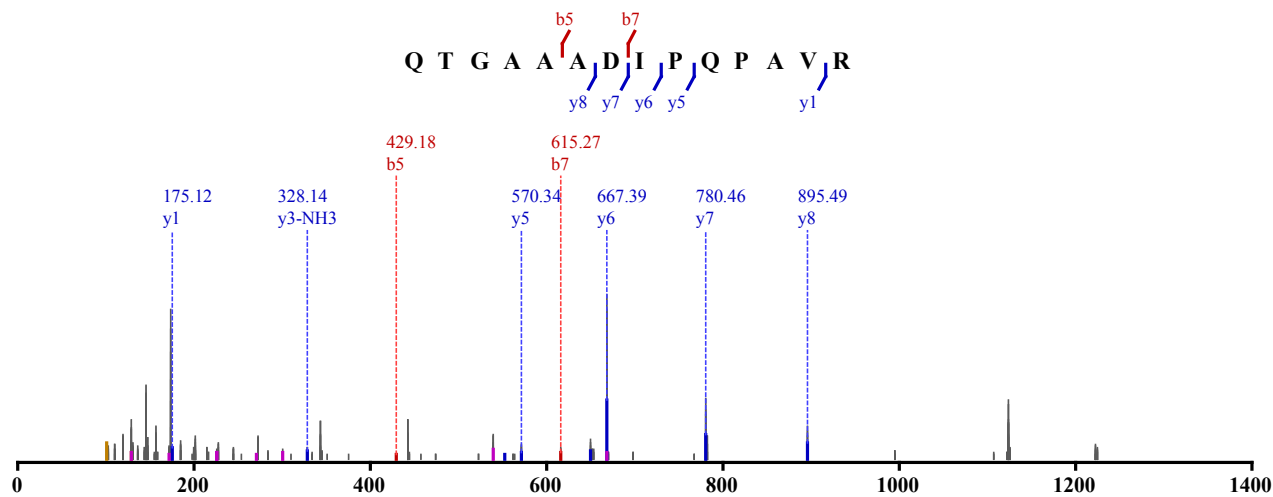

Not Modified  
 Identified in MSS130 with qvalue 0.01  
 Charge: 2, Exp. m/z: 697.875, Calc. m/z: 697.872  
 Data File: HeLa\_LysC-try\_HCD\_3, Scans: 27553 - 27553

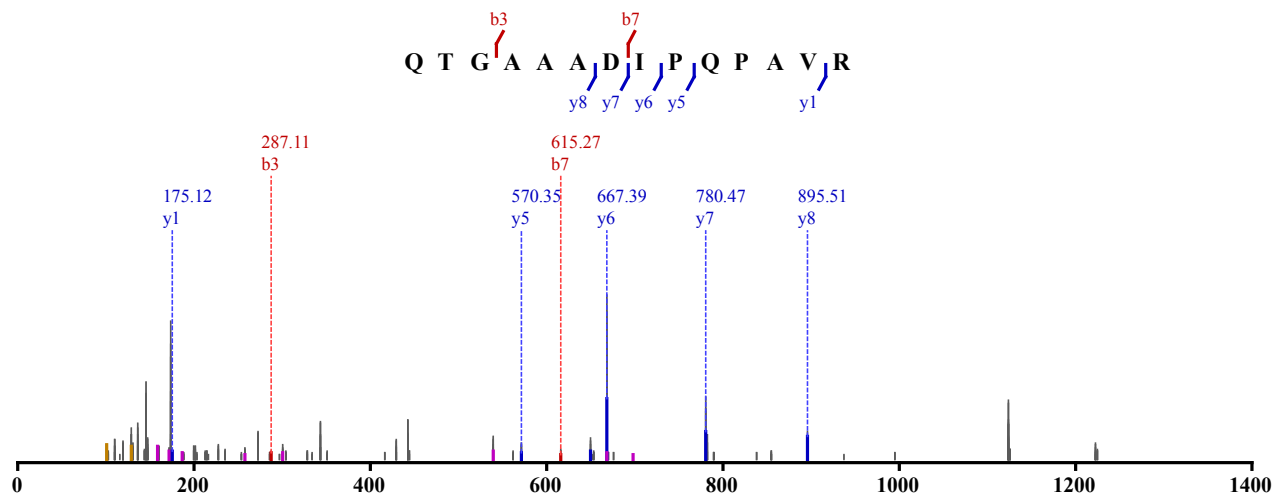

Not Modified  
 Identified in MSS130 with qvalue 0.00  
 Charge: 3, Exp. m/z: 465.587, Calc. m/z: 465.584  
 Data File: HeLa\_LysC-try\_HCD\_3, Scans: 28540 - 28540

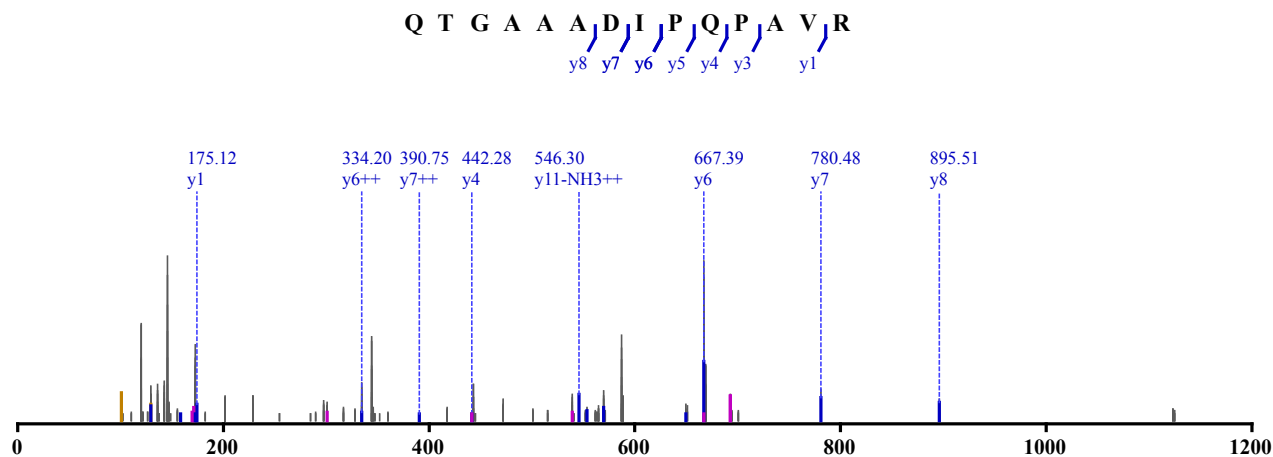

Not Modified  
 Identified in MSS128 with qvalue 0.00  
 Charge: 3, Exp. m/z: 497.628, Calc. m/z: 497.627

Data File: HeLa\_AspN\_HCD\_2, Scans: 21402 - 21402

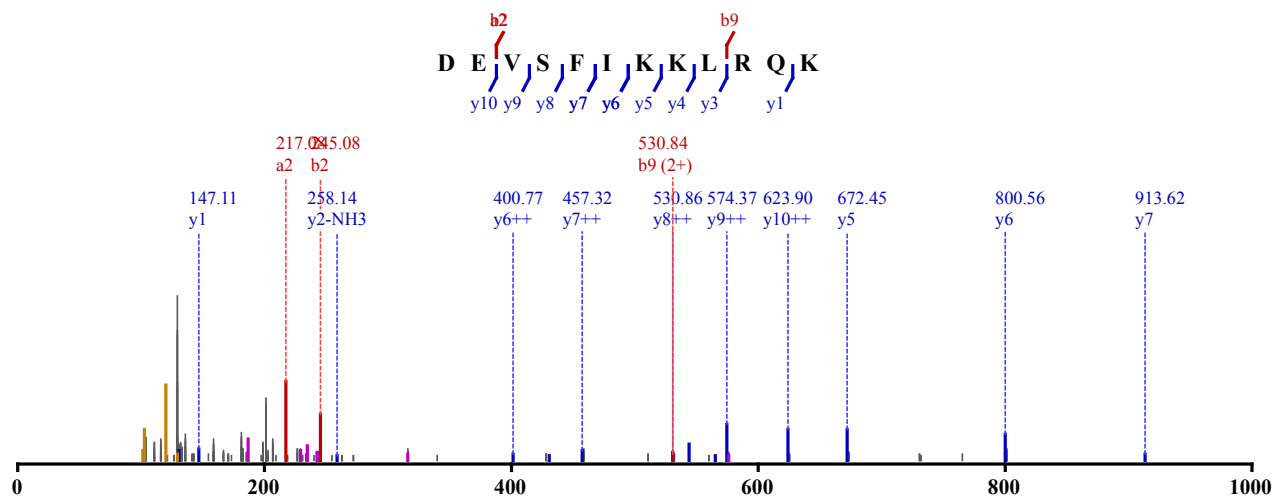

2 x Oxidation (M)

Identified in MSS483 with qvalue 0.00

Charge: 2, Exp. m/z: 901.905, Calc. m/z: 901.402

Data File: HeLa\_AspN\_pH11\_CID\_3xload, Scans: 41623 - 41623

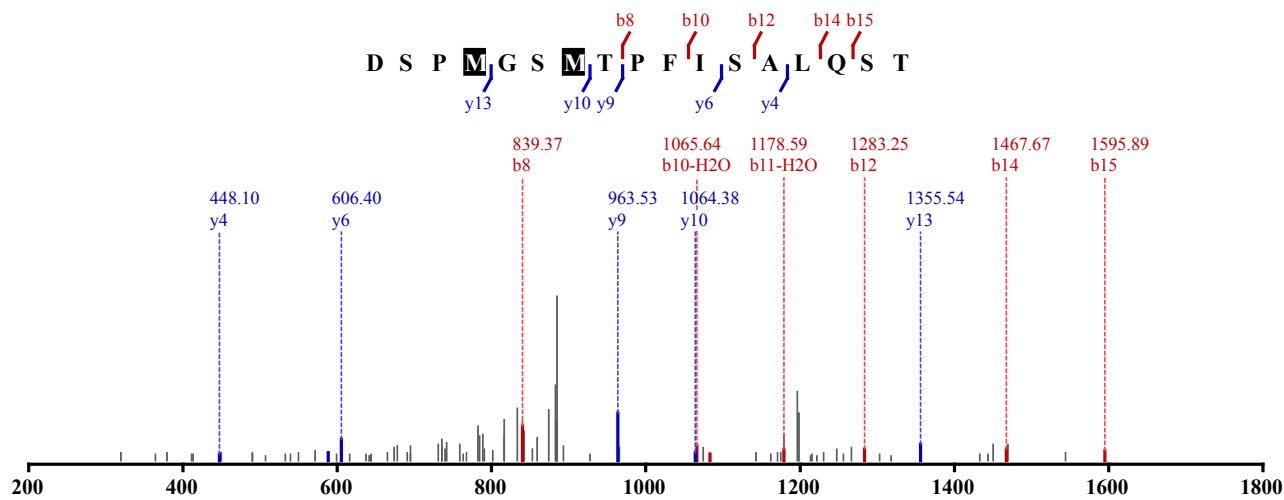

2 x Oxidation (M)

Identified in MSS483 with qvalue 0.00

Charge: 2, Exp. m/z: 901.404, Calc. m/z: 901.402

Data File: HeLa\_AspN\_pH11\_CID\_3xload, Scans: 41642 - 41642

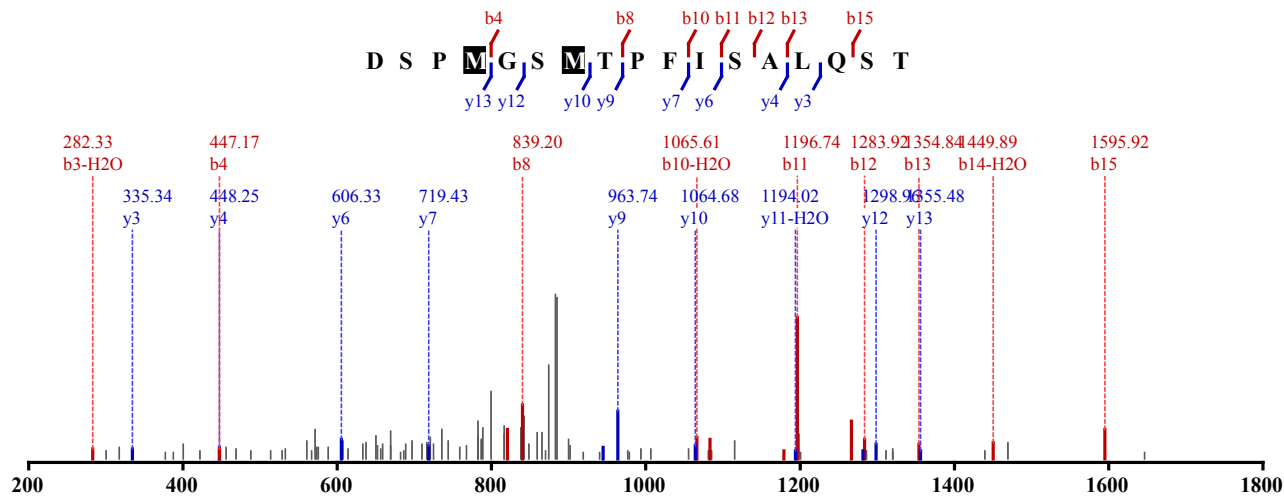

2 x Oxidation (M)

Identified in MSS483 with qvalue 0.00  
 Charge: 2, Exp. m/z: 901.403, Calc. m/z: 901.402  
 Data File: HeLa\_AspN\_pH11\_CID\_3xload, Scans: 41709 - 41709

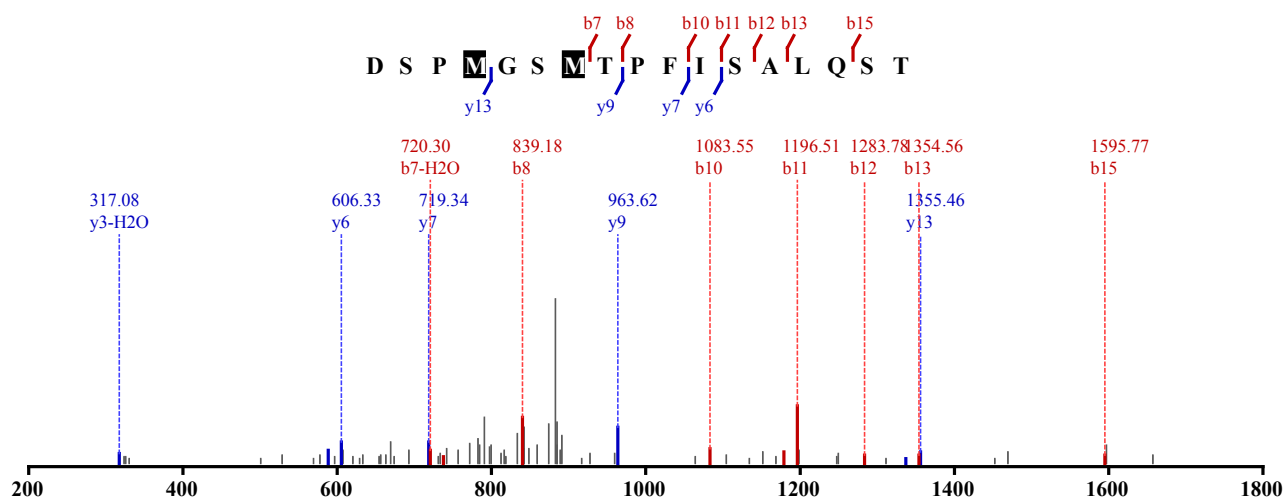

2 x Oxidation (M)  
 Identified in MSS483 with qvalue 0.00  
 Charge: 2, Exp. m/z: 901.403, Calc. m/z: 901.402  
 Data File: HeLa\_AspN\_pH11\_CID\_3xload\_2, Scans: 40833 - 40833

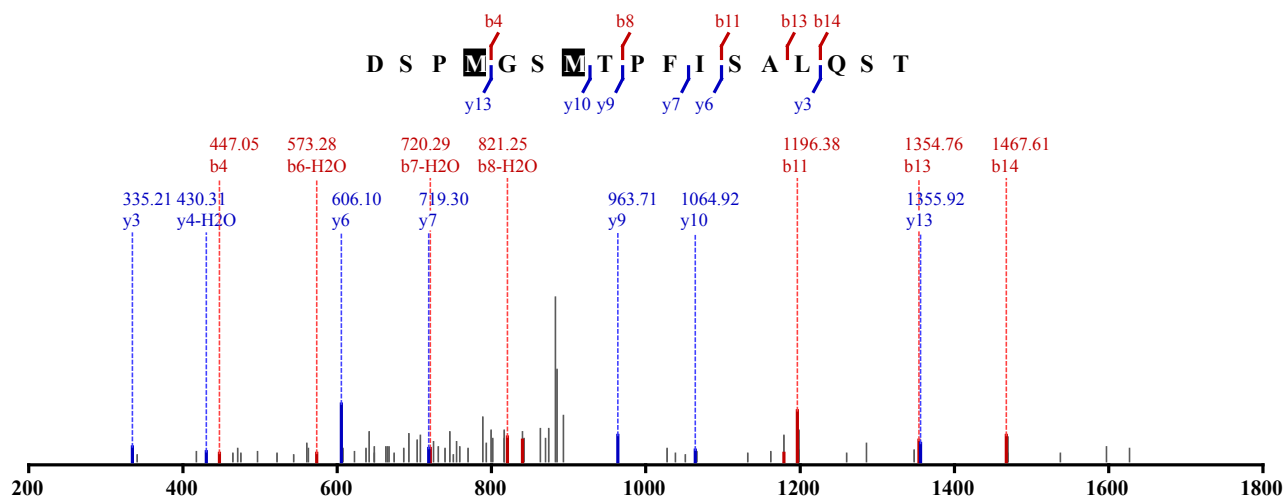

2 x Oxidation (M)  
 Identified in MSS483 with qvalue 0.00  
 Charge: 2, Exp. m/z: 901.906, Calc. m/z: 901.402  
 Data File: HeLa\_AspN\_pH11\_CID\_3xload\_2, Scans: 40854 - 40854

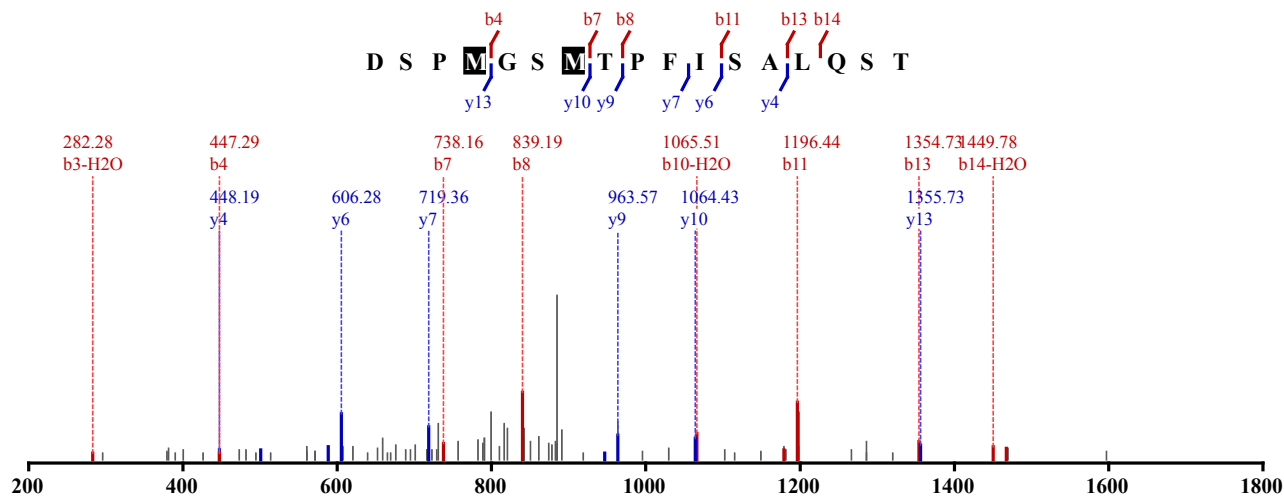

2 x Oxidation (M)

Identified in MSS483 with qvalue 0.00

Charge: 2, Exp. m/z: 901.404, Calc. m/z: 901.402

Data File: HeLa\_AspN\_pH11\_CID\_3xload\_2, Scans: 40906 - 40906

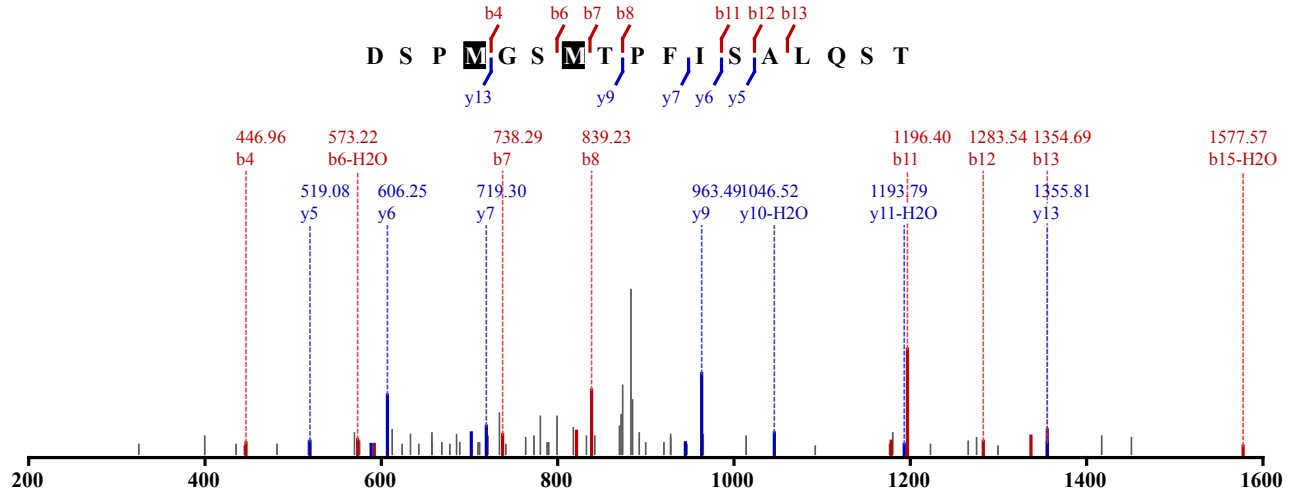

Not Modified

Identified in MSS271 with qvalue 0.00

Charge: 2, Exp. m/z: 478.793, Calc. m/z: 478.793

Data File: HeLa\_ArgC-Chytry\_HCD\_3, Scans: 25828 - 25828

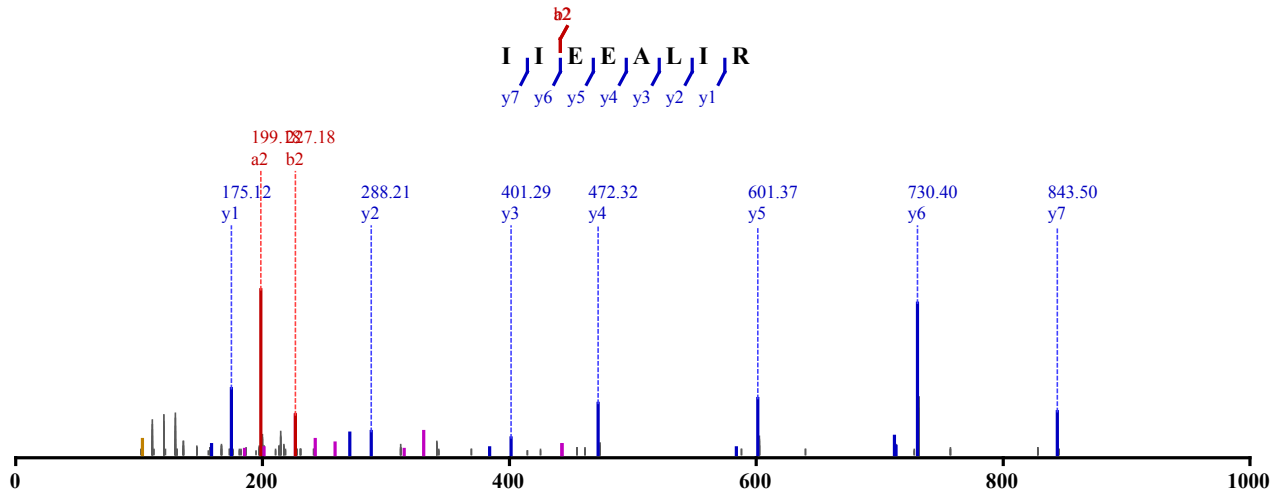

Not Modified

Identified in MSS427 with qvalue 0.00

Charge: 2, Exp. m/z: 478.793, Calc. m/z: 478.793

Data File: HeLa\_chytry-try\_CID-ETD\_2, Scans: 20498 - 20498

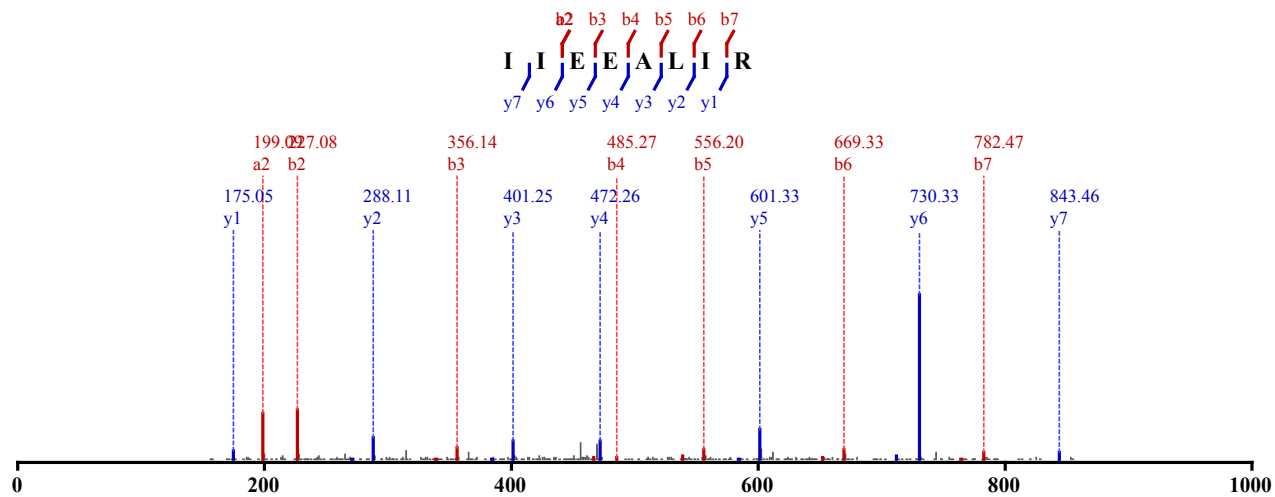

Not Modified  
 Identified in MSS488 with qvalue 0.00  
 Charge: 2, Exp. m/z: 478.792, Calc. m/z: 478.793  
 Data File: HeLa\_chy-try\_pH3\_CID\_3xload, Scans: 32465 - 32465

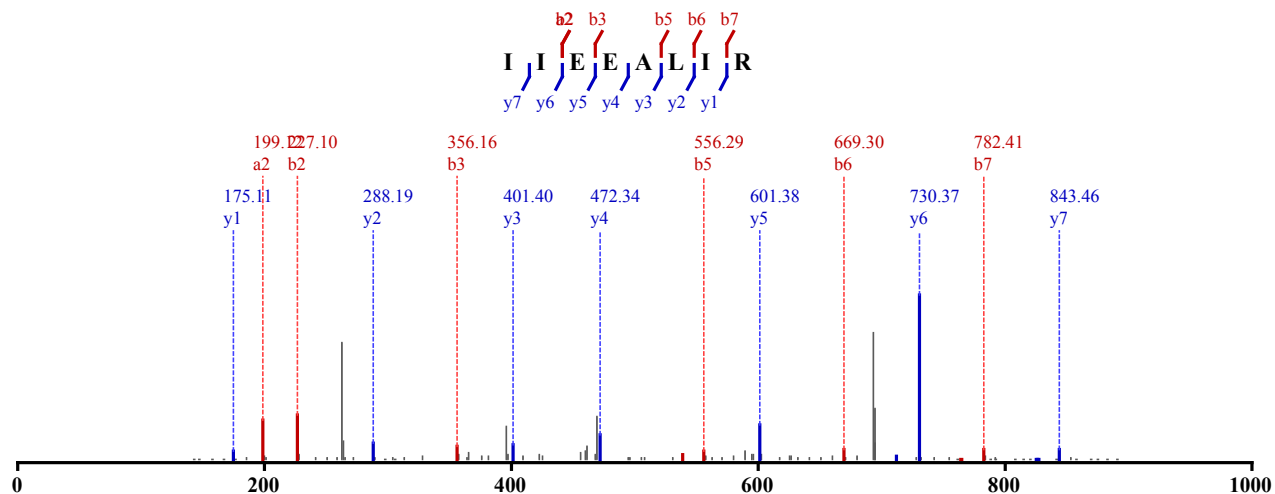

Not Modified  
 Identified in MSS488 with qvalue 0.00  
 Charge: 2, Exp. m/z: 478.792, Calc. m/z: 478.793  
 Data File: HeLa\_chy-try\_pH4\_CID\_3xload\_3, Scans: 26326 - 26326

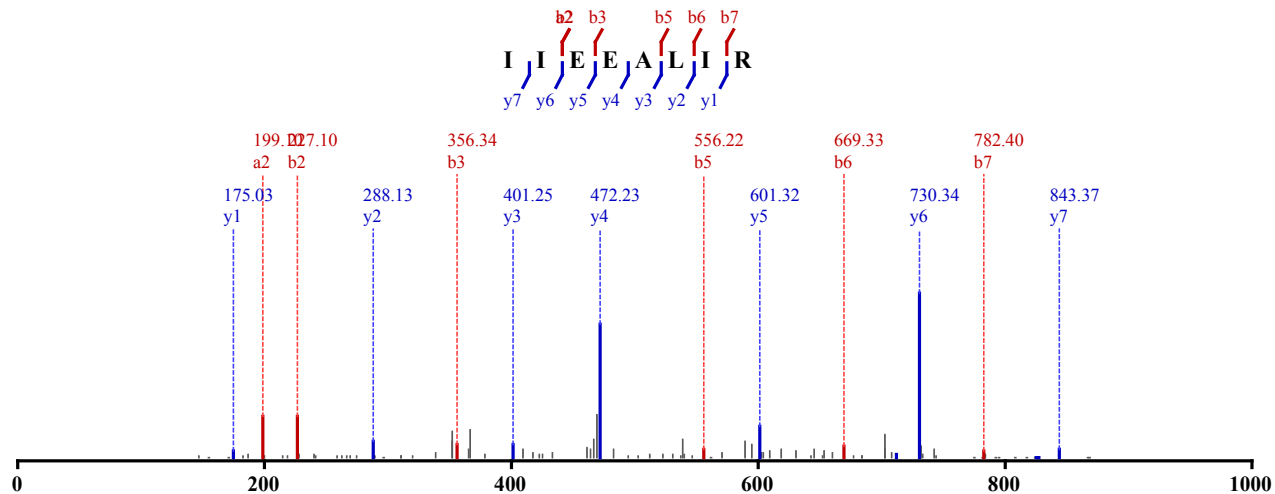

Not Modified  
 Identified in MSS488 with qvalue 0.00  
 Charge: 2, Exp. m/z: 478.792, Calc. m/z: 478.793



Data File: HeLa\_chy-try\_pH4\_CID\_3xload, Scans: 29977 - 29977

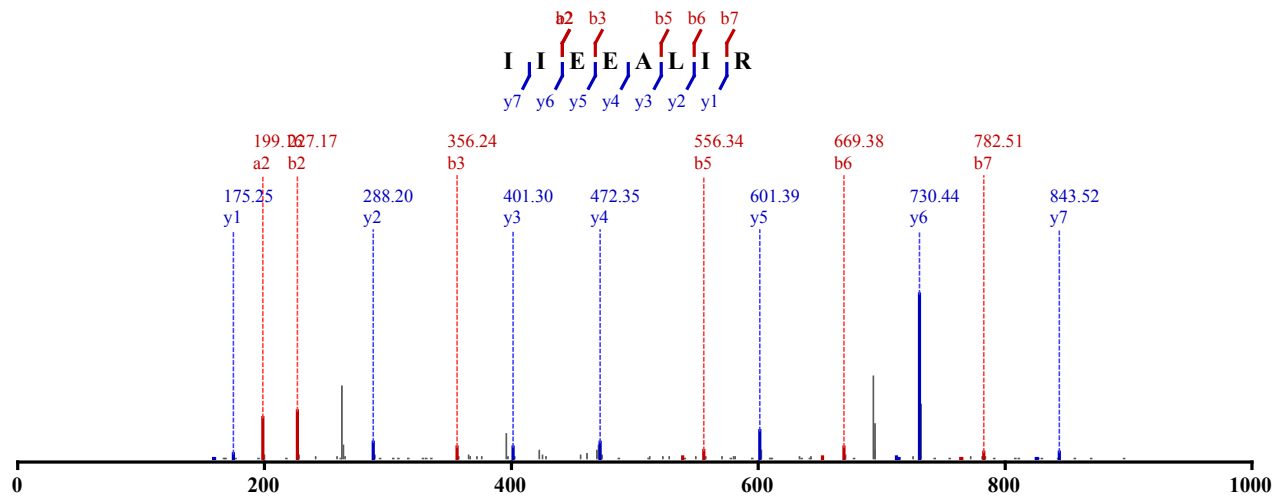

Not Modified

Identified in MSS488 with qvalue 0.00

Charge: 2, Exp. m/z: 478.792, Calc. m/z: 478.793

Data File: HeLa\_chy-try\_pH5\_CID\_3xload\_3, Scans: 27722 - 27722

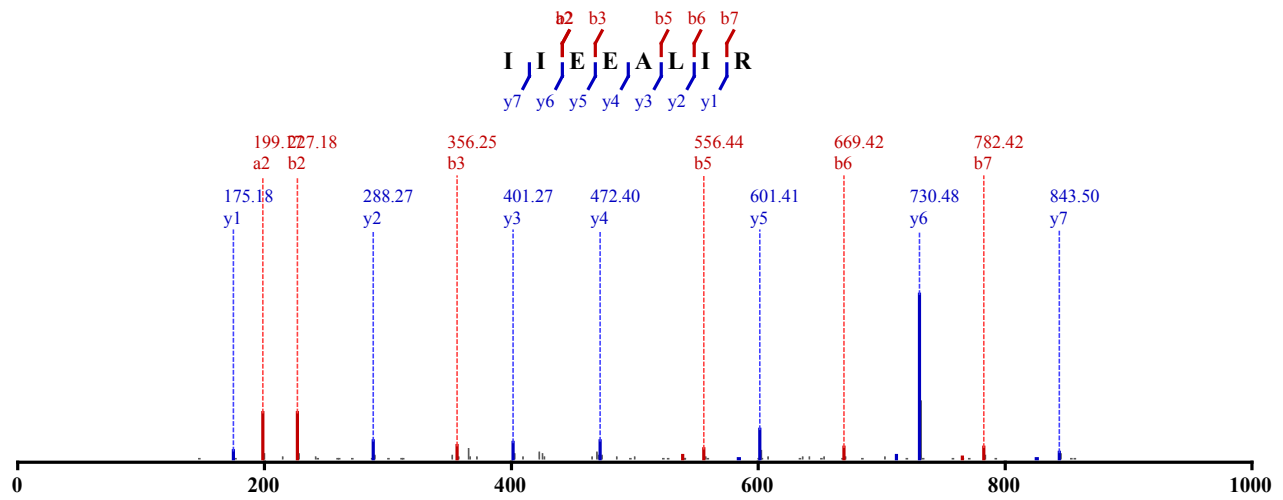

Not Modified

Identified in MSS488 with qvalue 0.00

Charge: 2, Exp. m/z: 478.793, Calc. m/z: 478.793

Data File: HeLa\_chy-try\_pH5\_CID\_3xload\_3, Scans: 27863 - 27863

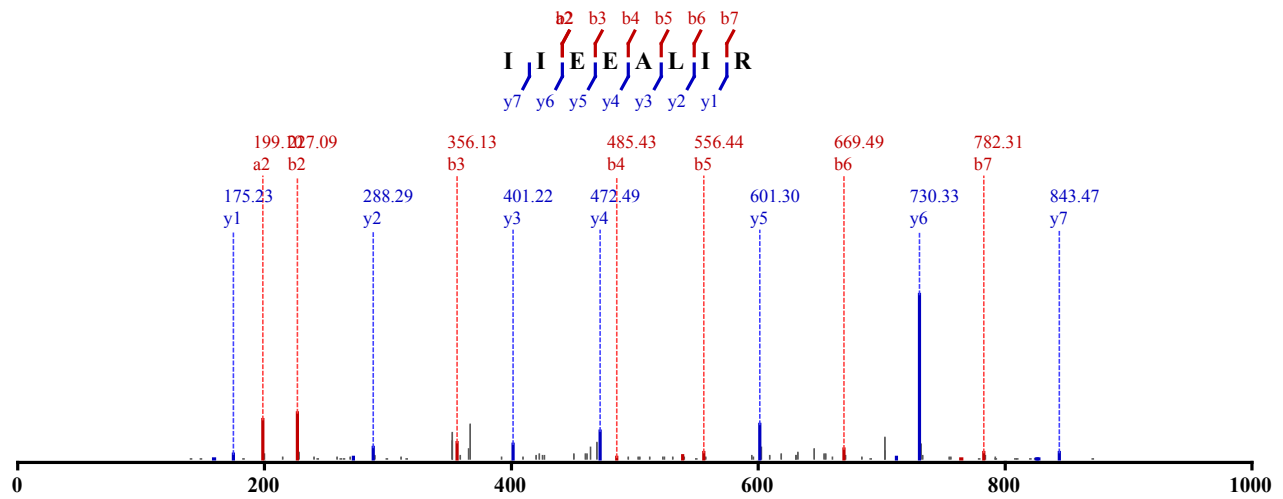

Not Modified

Identified in MSS488 with qvalue 0.00  
 Charge: 2, Exp. m/z: 478.793, Calc. m/z: 478.792  
 Data File: HeLa\_chy-try\_80pcACN\_CID\_3xload\_3, Scans: 28543 - 28543

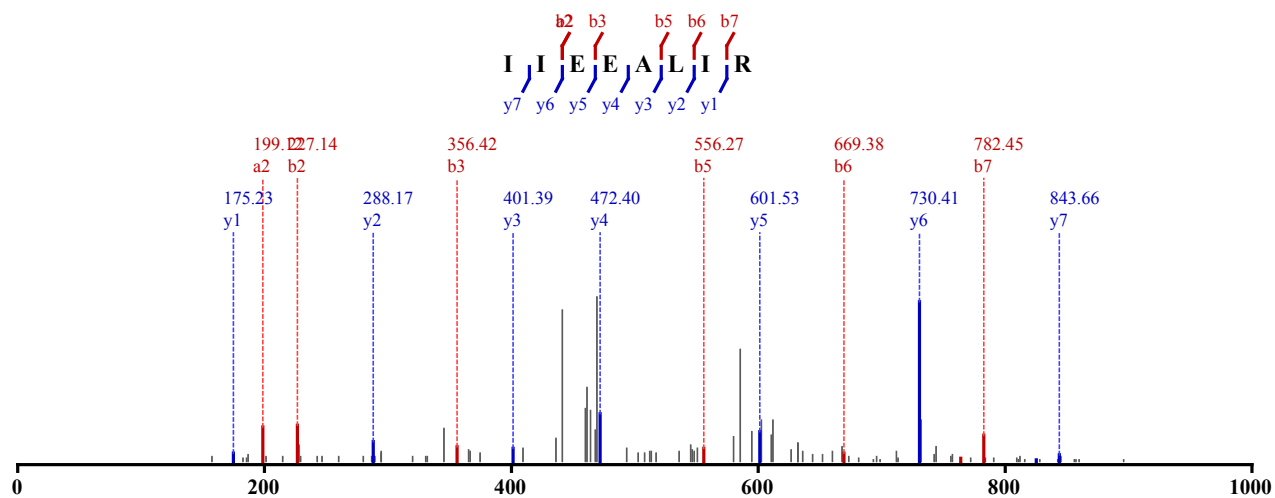

Not Modified  
 Identified in MSS488 with qvalue 0.00  
 Charge: 2, Exp. m/z: 478.793, Calc. m/z: 478.792  
 Data File: HeLa\_chy-try\_pH6\_CID\_3xload\_2, Scans: 34247 - 34247

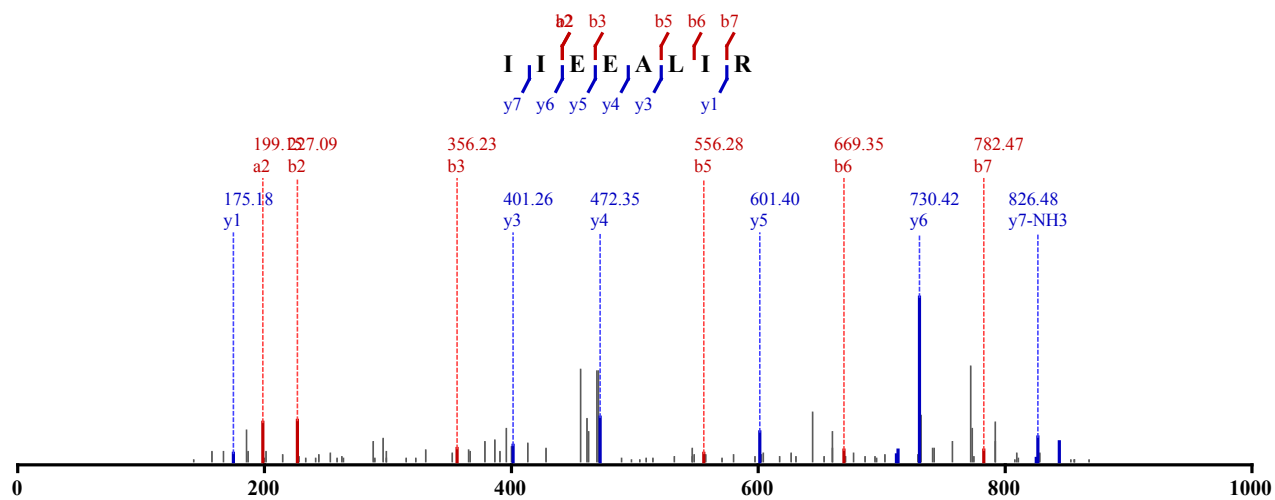

Not Modified  
 Identified in MSS488 with qvalue 0.00  
 Charge: 2, Exp. m/z: 478.792, Calc. m/z: 478.792  
 Data File: HeLa\_chy-try\_pH8\_CID\_3xload\_3, Scans: 23958 - 23958

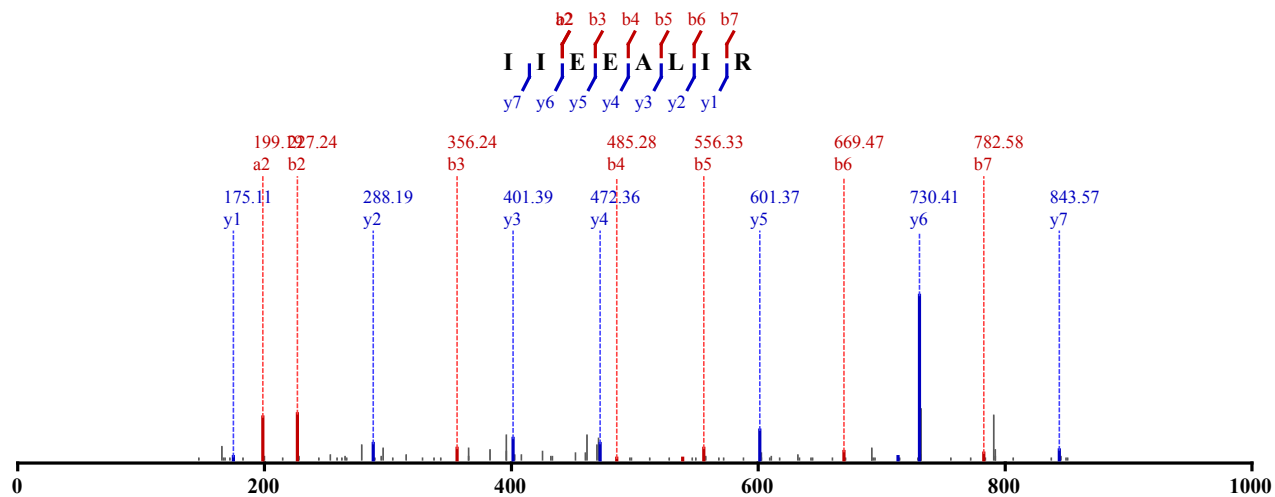

Not Modified

Identified in MSS479 with qvalue 0.00

Charge: 2, Exp. m/z: 526.202, Calc. m/z: 526.202

Data File: HeLa\_AspN\_pH5\_HCD\_1, Scans: 7933 - 7933

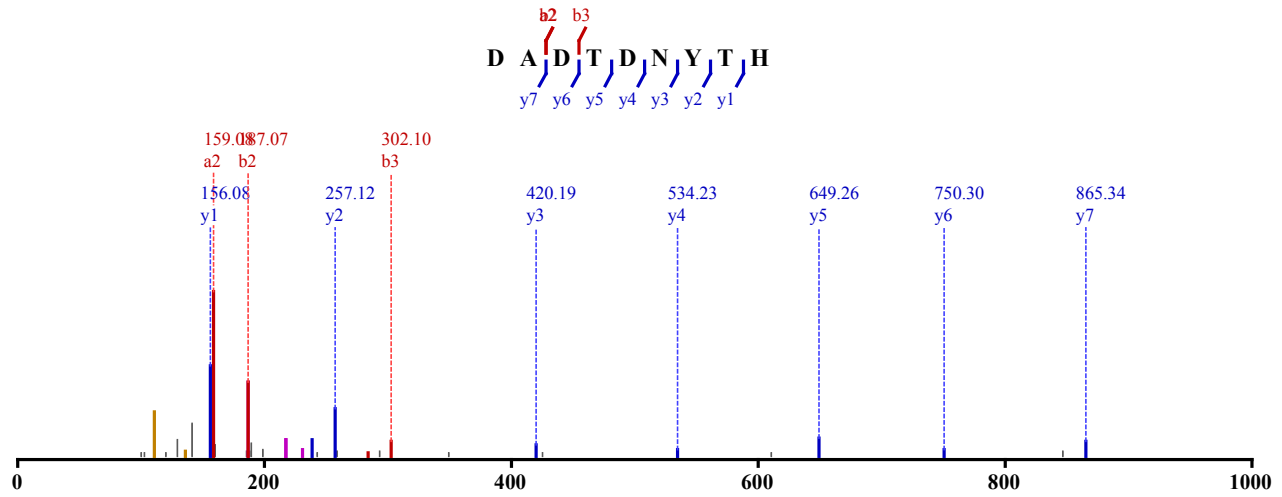

Not Modified

Identified in MSS479 with qvalue 0.00

Charge: 2, Exp. m/z: 526.200, Calc. m/z: 526.202

Data File: HeLa\_AspN\_pH5\_HCD\_2, Scans: 6686 - 6686

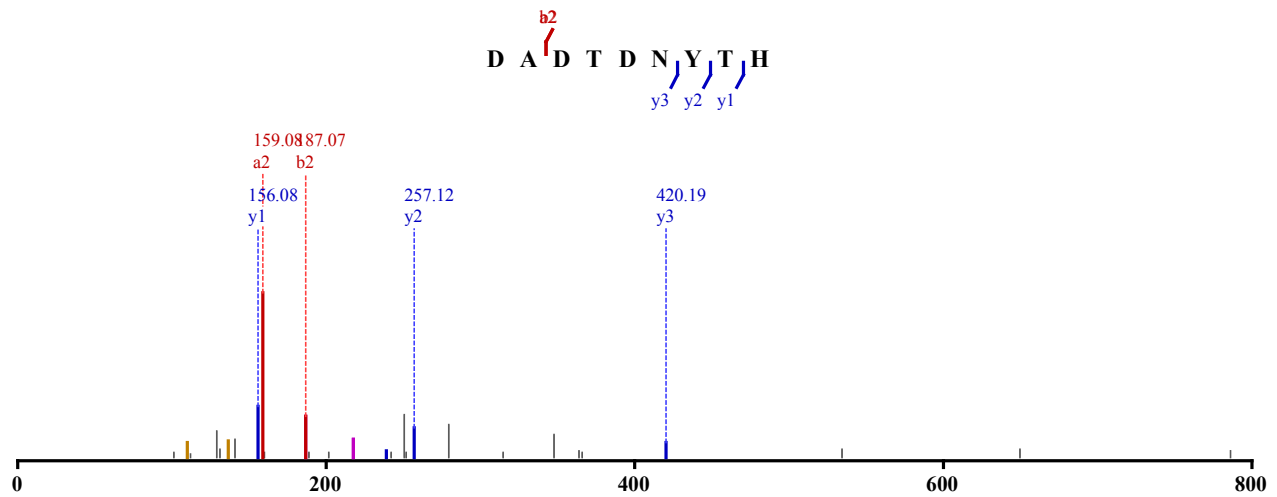

Not Modified

Identified in MSS483 with qvalue 0.00

Charge: 2, Exp. m/z: 526.201, Calc. m/z: 526.202

Data File: HeLa\_AspN\_pH6\_CID\_3xload, Scans: 4724 - 4724

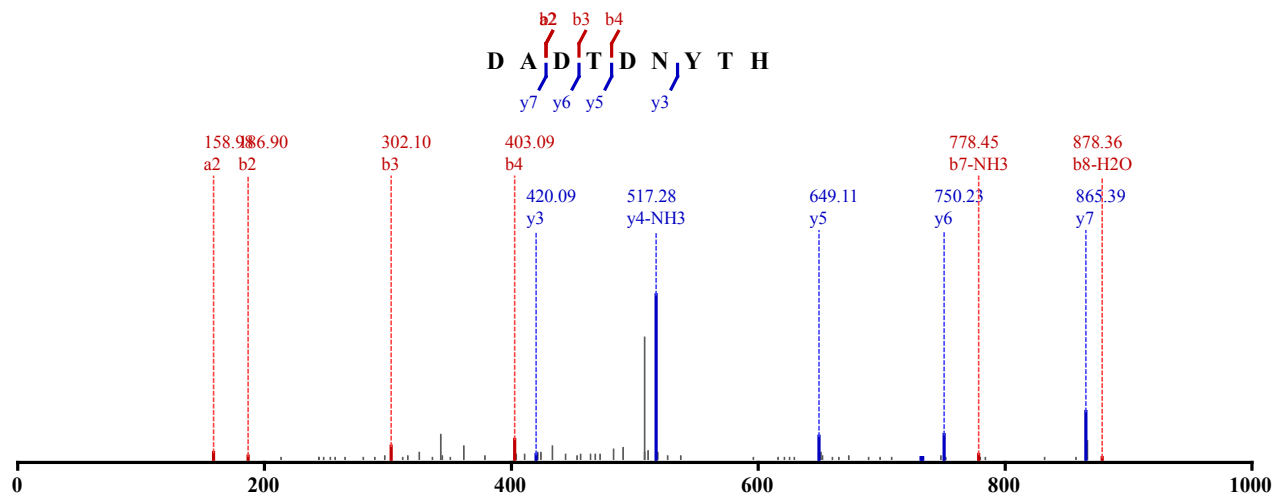

Not Modified  
 Identified in MSS483 with qvalue 0.00  
 Charge: 2, Exp. m/z: 526.201, Calc. m/z: 526.202  
 Data File: HeLa\_AspN\_pH4\_CID\_3xload, Scans: 3997 - 3997

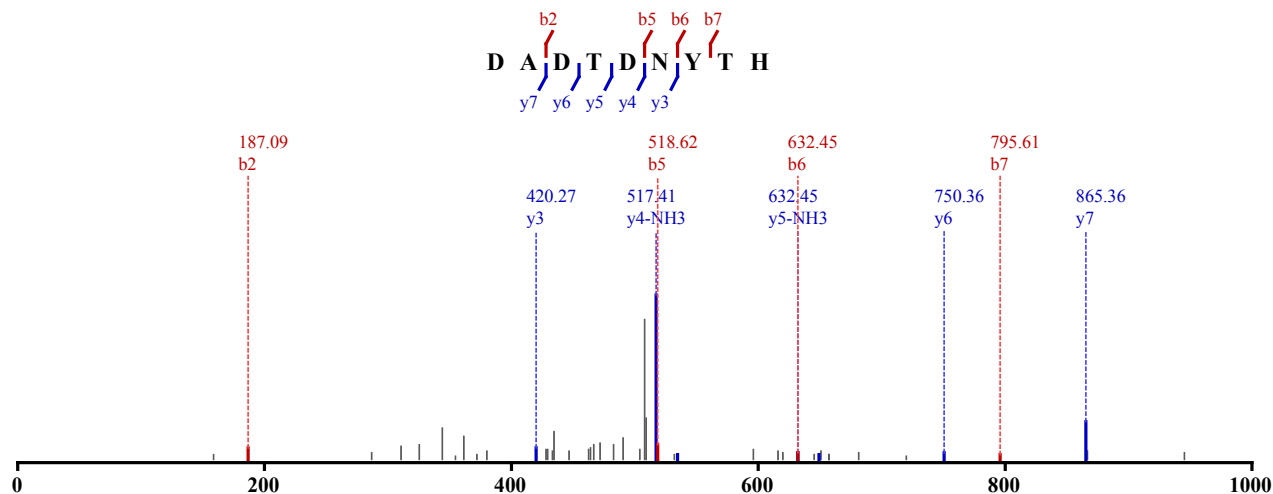

Not Modified  
 Identified in MSS483 with qvalue 0.00  
 Charge: 2, Exp. m/z: 526.202, Calc. m/z: 526.202  
 Data File: HeLa\_AspN\_pH6\_CID\_3xload\_2, Scans: 4674 - 4674

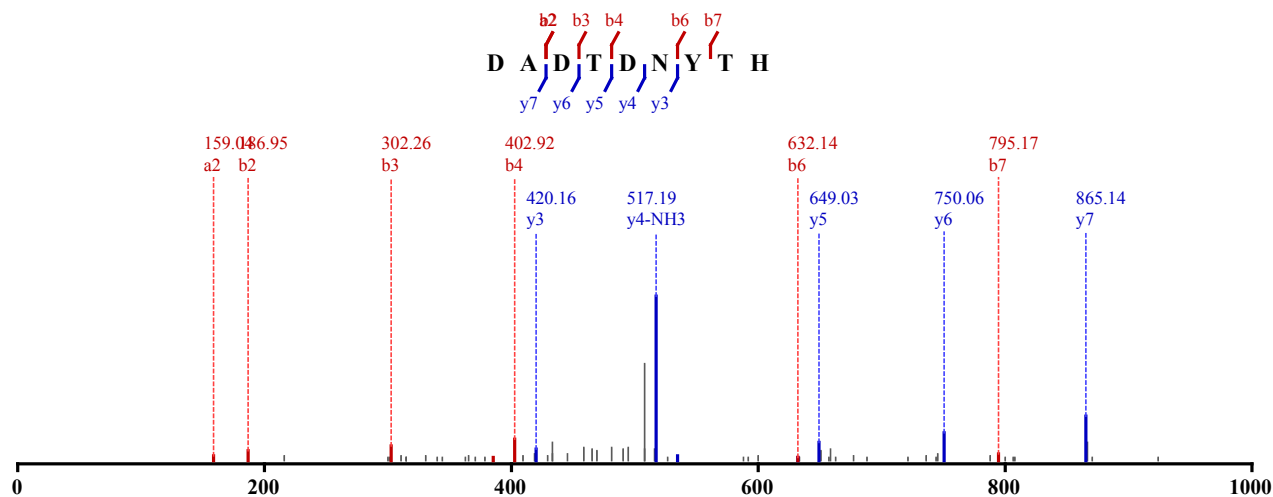

Not Modified  
 Identified in MSS479 with qvalue 0.00  
 Charge: 2, Exp. m/z: 520.803, Calc. m/z: 520.802

Data File: HeLa\_AspN\_pH6\_HCD\_1, Scans: 42295 - 42295

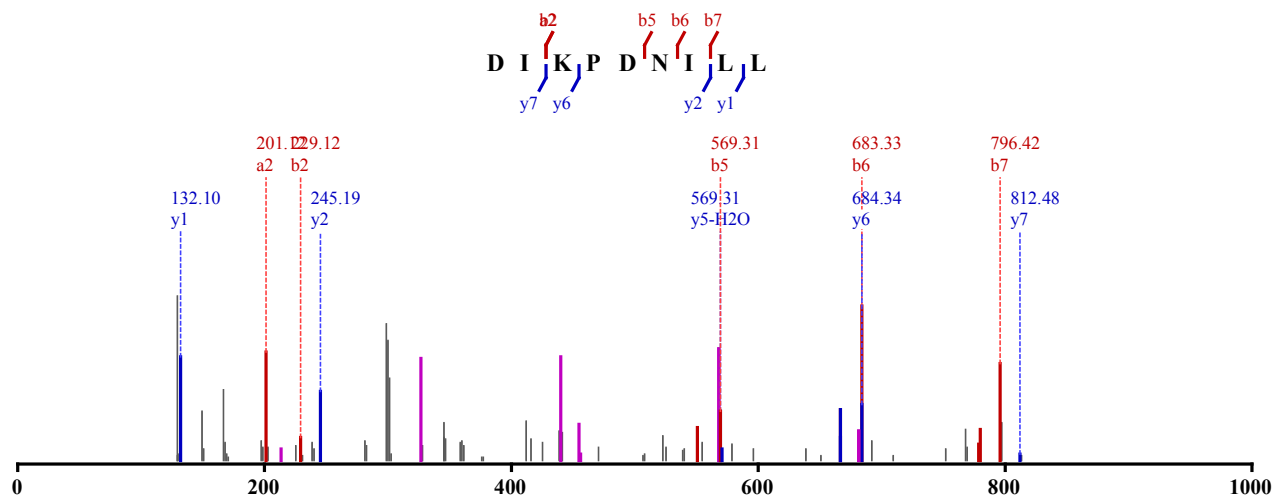

Not Modified

Identified in MSS479 with qvalue 0.00

Charge: 2, Exp. m/z: 520.803, Calc. m/z: 520.802

Data File: HeLa\_AspN\_pH6\_HCD\_2, Scans: 41479 - 41479

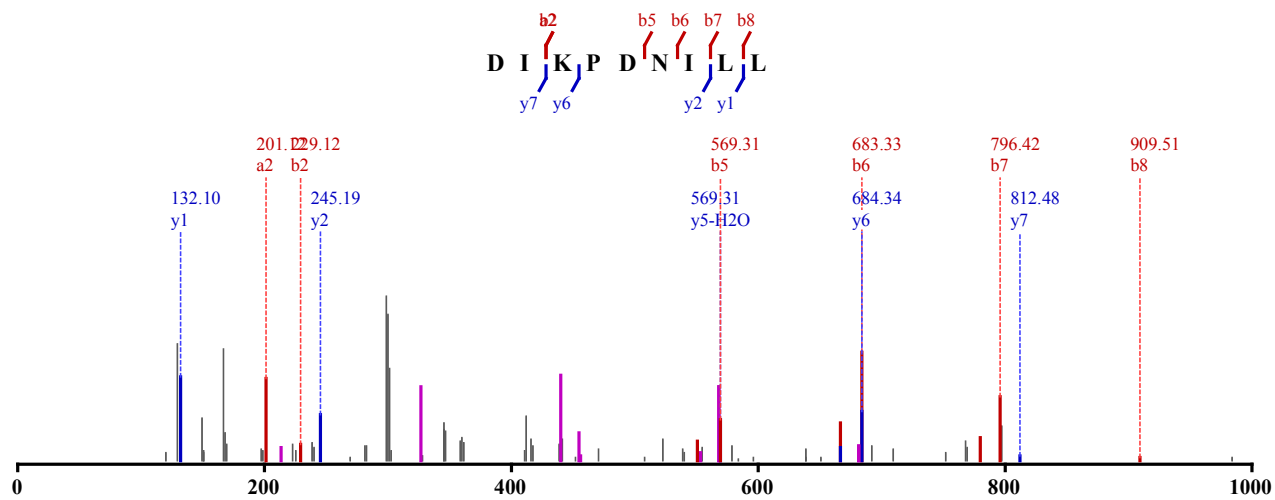

Not Modified

Identified in MSS479 with qvalue 0.00

Charge: 2, Exp. m/z: 520.803, Calc. m/z: 520.802

Data File: HeLa\_AspN\_pH6\_HCD\_2, Scans: 41571 - 41571

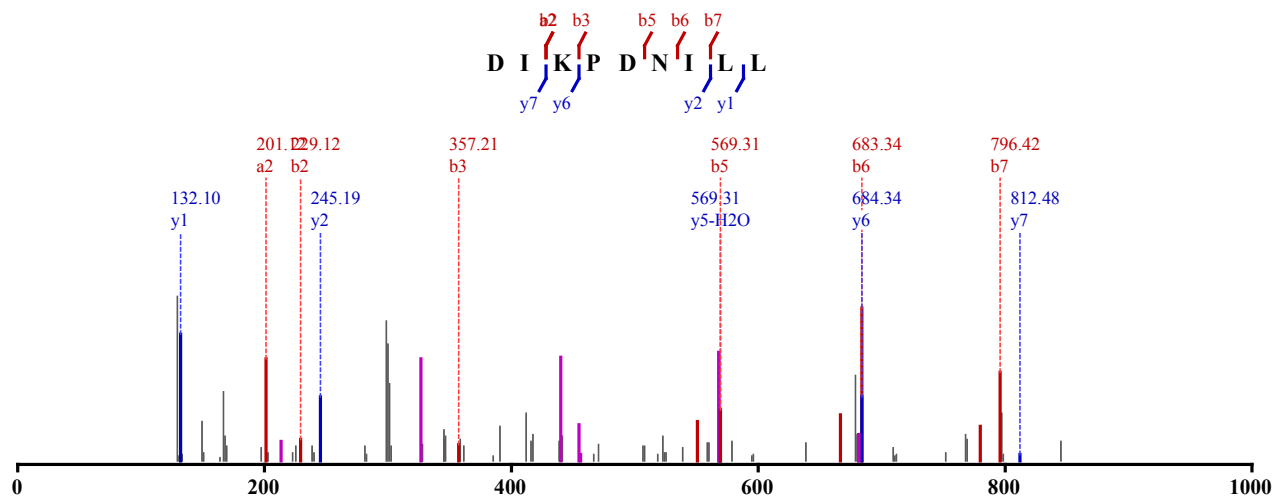

Not Modified

Identified in MSS483 with qvalue 0.00  
 Charge: 2, Exp. m/z: 520.803, Calc. m/z: 520.802  
 Data File: HeLa\_AspN\_pH6\_CID\_3xload, Scans: 27015 - 27015

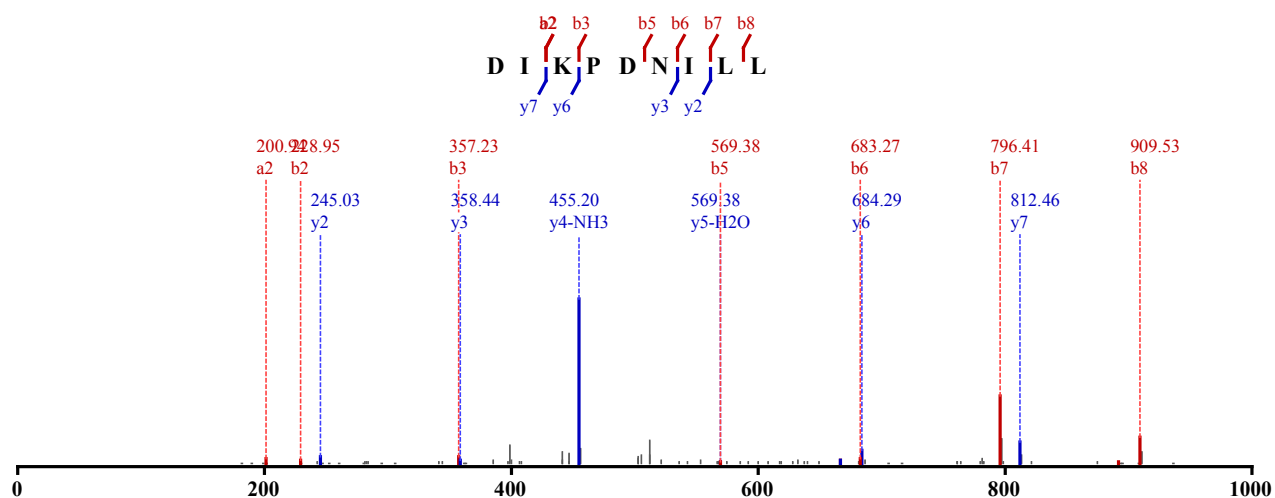

Not Modified  
 Identified in MSS483 with qvalue 0.00  
 Charge: 2, Exp. m/z: 520.803, Calc. m/z: 520.802  
 Data File: HeLa\_AspN\_pH8\_CID\_3xload\_2, Scans: 32793 - 32793

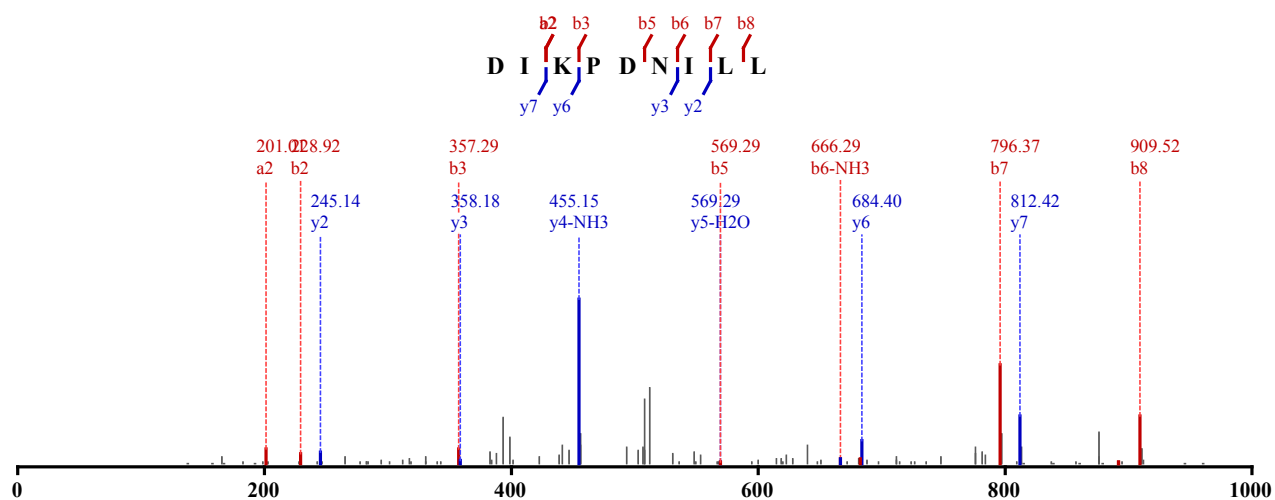

Not Modified  
 Identified in MSS483 with qvalue 0.00  
 Charge: 2, Exp. m/z: 520.803, Calc. m/z: 520.802  
 Data File: HeLa\_AspN\_pH8\_CID\_3xload, Scans: 32083 - 32083

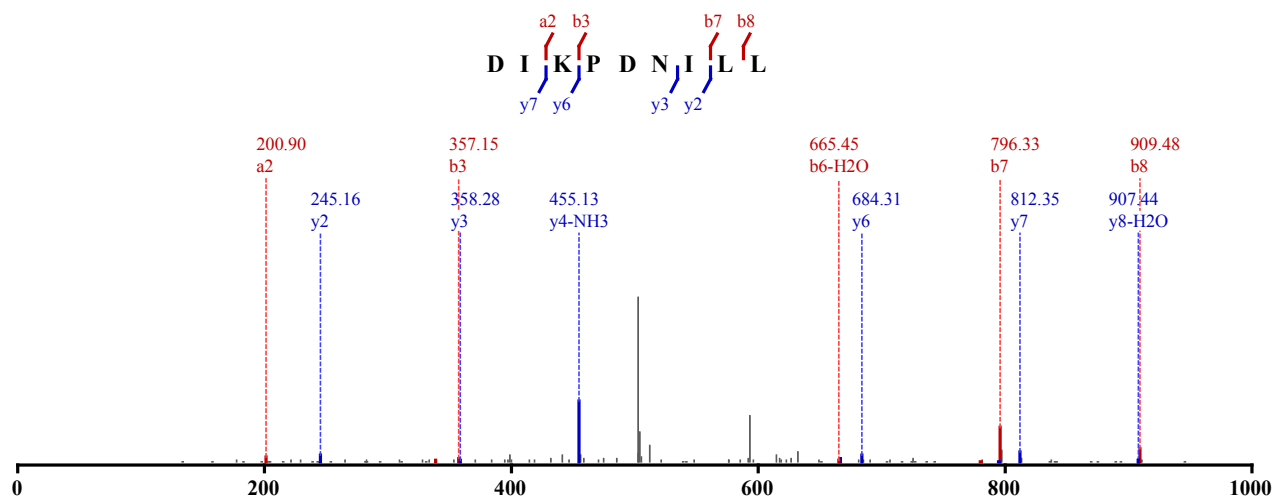

Not Modified  
 Identified in MSS483 with qvalue 0.00  
 Charge: 2, Exp. m/z: 520.803, Calc. m/z: 520.802  
 Data File: HeLa\_AspN\_pH8\_CID\_3xload, Scans: 32989 - 32989

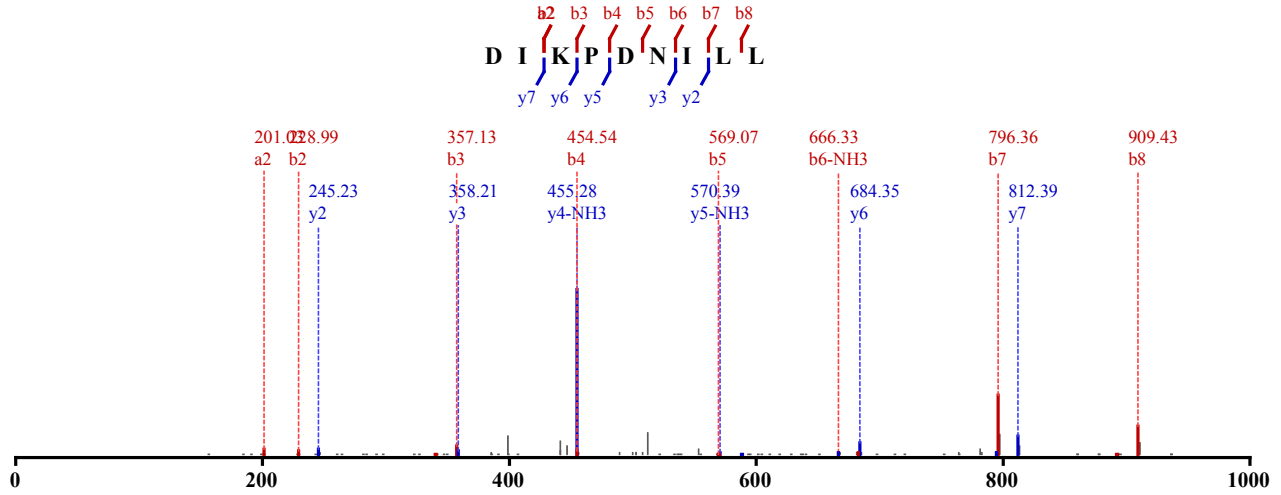

Not Modified  
 Identified in MSS480 with qvalue 0.00  
 Charge: 2, Exp. m/z: 812.422, Calc. m/z: 812.422  
 Data File: HeLa\_try\_pH5\_CID\_3xload\_2, Scans: 39865 - 39865

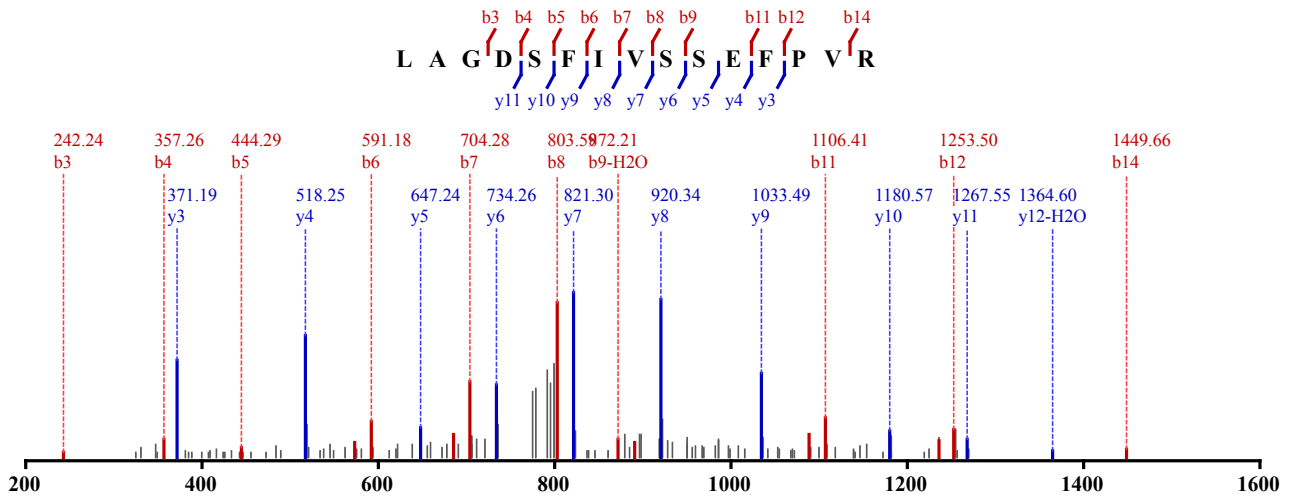

Not Modified  
 Identified in MSS480 with qvalue 0.00  
 Charge: 2, Exp. m/z: 812.425, Calc. m/z: 812.422  
 Data File: HeLa\_try\_pH5\_CID\_3xload\_3, Scans: 39791 - 39791

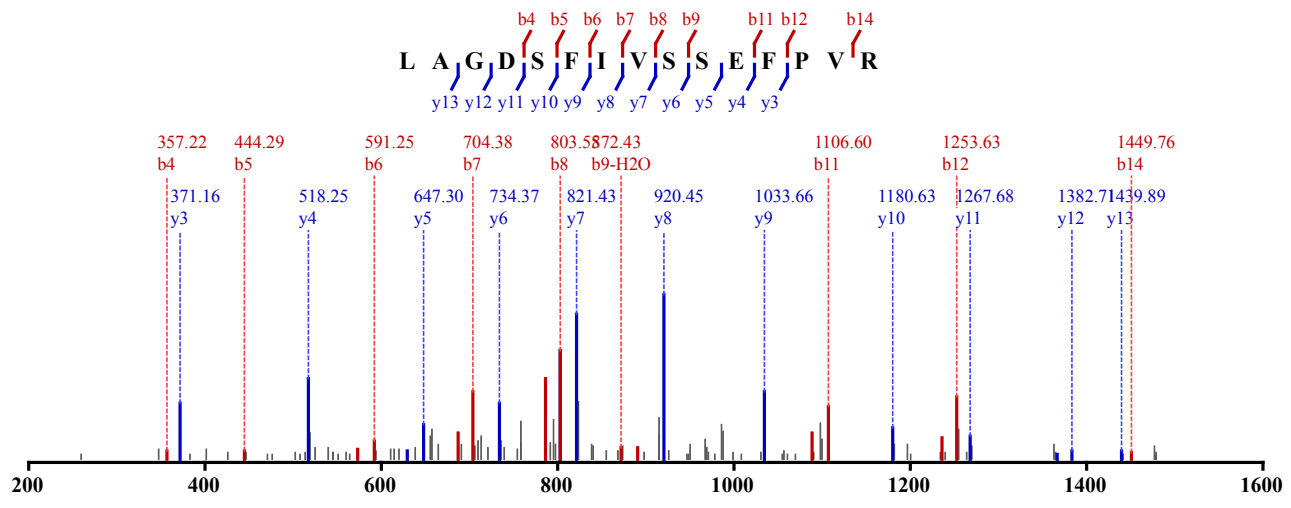

Not Modified  
 Identified in MSS484 with qvalue 0.00  
 Charge: 2, Exp. m/z: 812.423, Calc. m/z: 812.422  
 Data File: HeLa\_Try\_pH6\_HCD\_1, Scans: 55663 - 55663

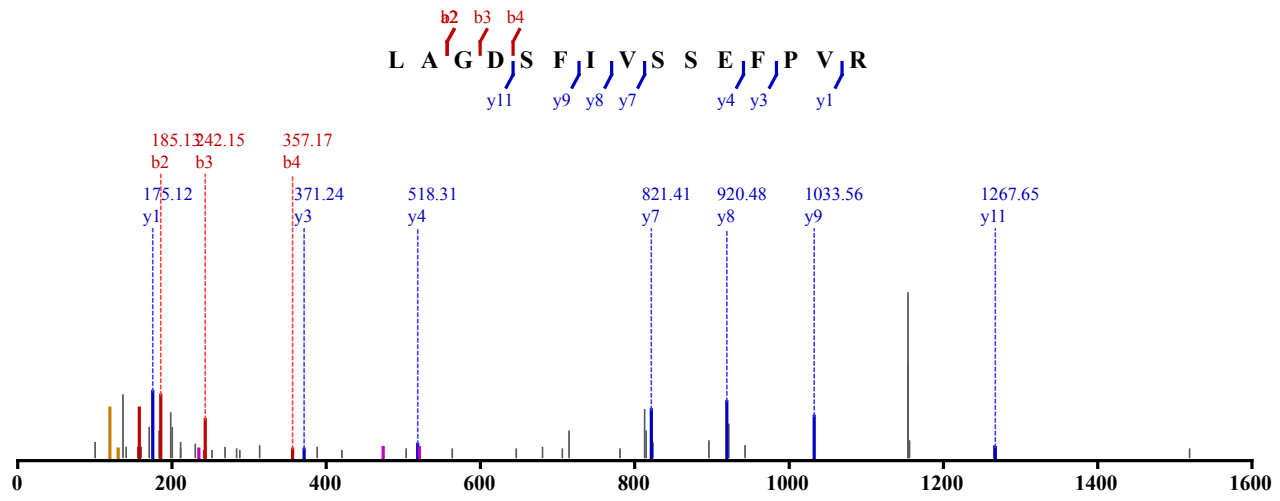

Not Modified  
 Identified in MSS484 with qvalue 0.00  
 Charge: 2, Exp. m/z: 812.421, Calc. m/z: 812.422  
 Data File: HeLa\_Try\_pH5\_HCD\_1, Scans: 53846 - 53846

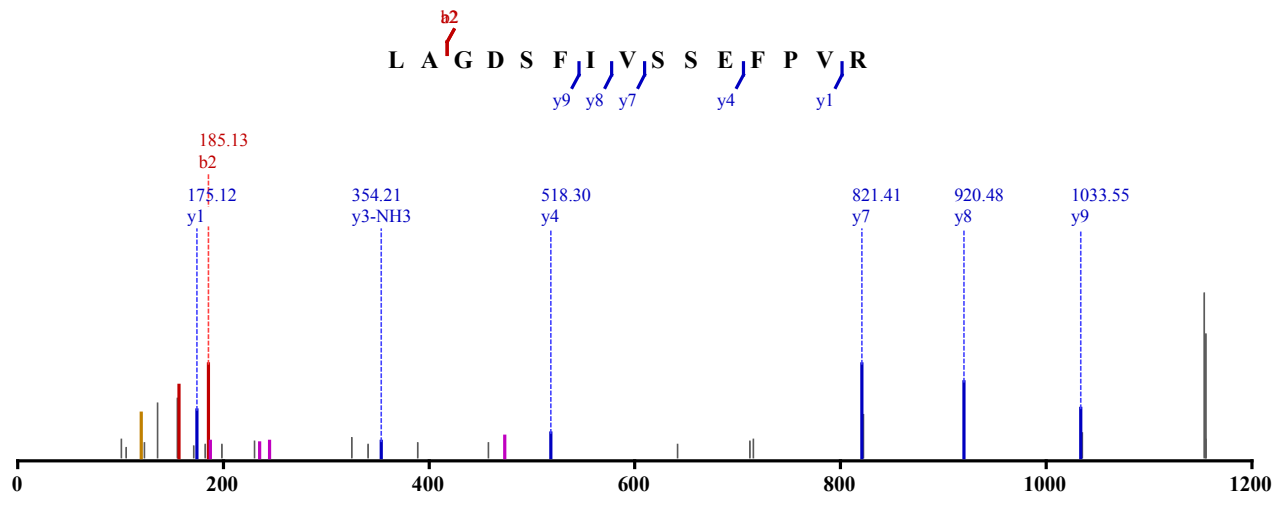

Not Modified  
 Identified in MSS485 with qvalue 0.00  
 Charge: 2, Exp. m/z: 909.924, Calc. m/z: 909.922



Data File: HeLa\_LysC\_pH11\_HCD\_3, Scans: 23061 - 23061

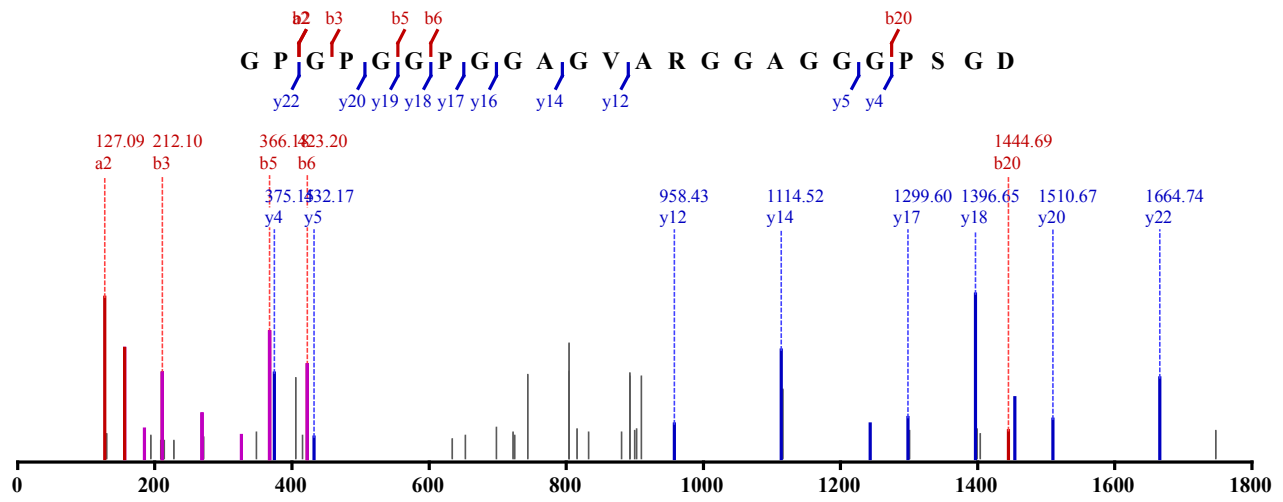

Not Modified

Identified in MSS485 with qvalue 0.00

Charge: 2, Exp. m/z: 909.922, Calc. m/z: 909.927

Data File: HeLa\_LysC\_pH11\_HCD\_1, Scans: 24652 - 24652

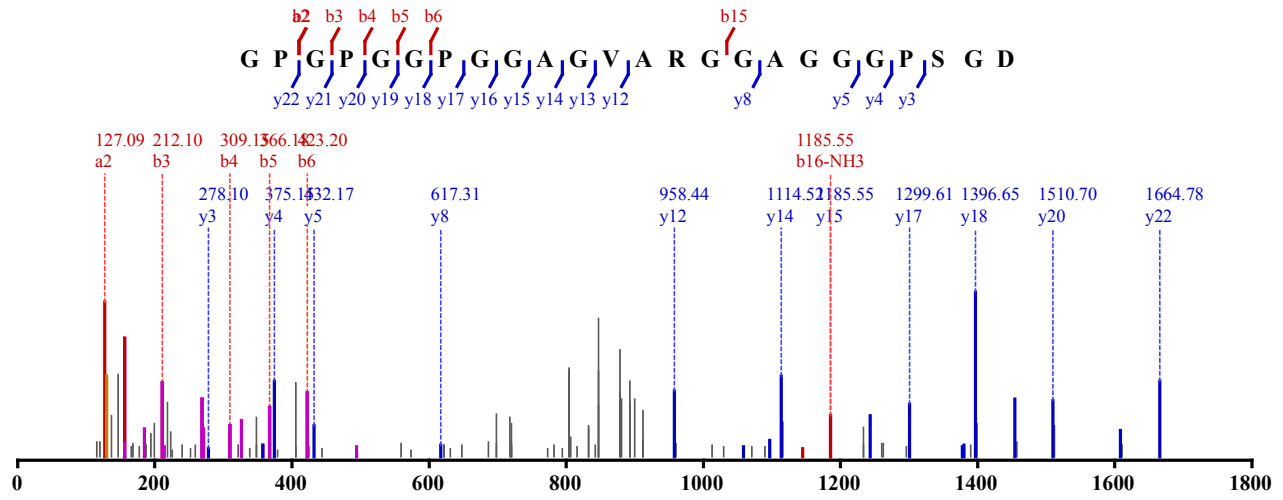

Not Modified

Identified in MSS485 with qvalue 0.00

Charge: 2, Exp. m/z: 909.928, Calc. m/z: 909.927

Data File: HeLa\_LysC\_pH11\_HCD\_2, Scans: 23655 - 23655

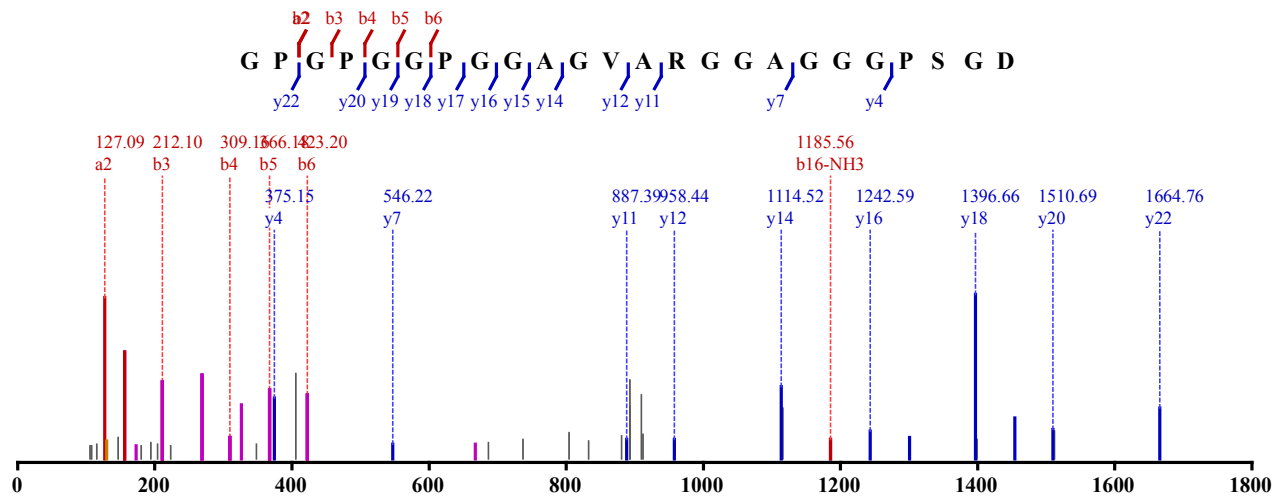

Not Modified



Not Modified

Identified in MSS113 with qvalue 0.00

Charge: 2, Exp. m/z: 642.862, Calc. m/z: 642.862

Data File: HeLa\_try\_CID\_1, Scans: 46818 - 46818

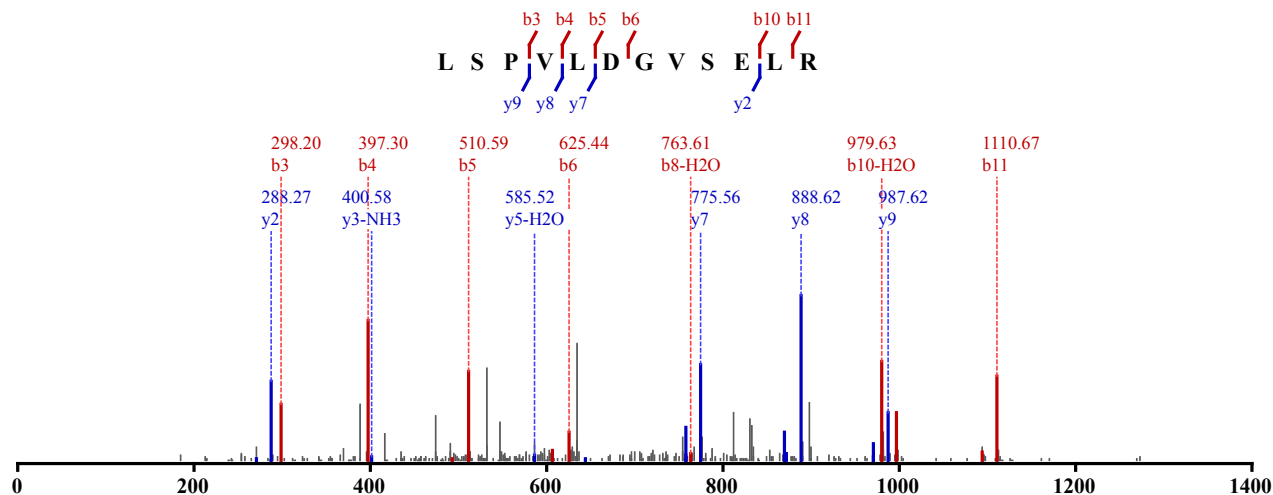

Not Modified

Identified in MSS113 with qvalue 0.00

Charge: 2, Exp. m/z: 642.862, Calc. m/z: 642.862

Data File: HeLa\_try\_CID\_3, Scans: 48483 - 48483

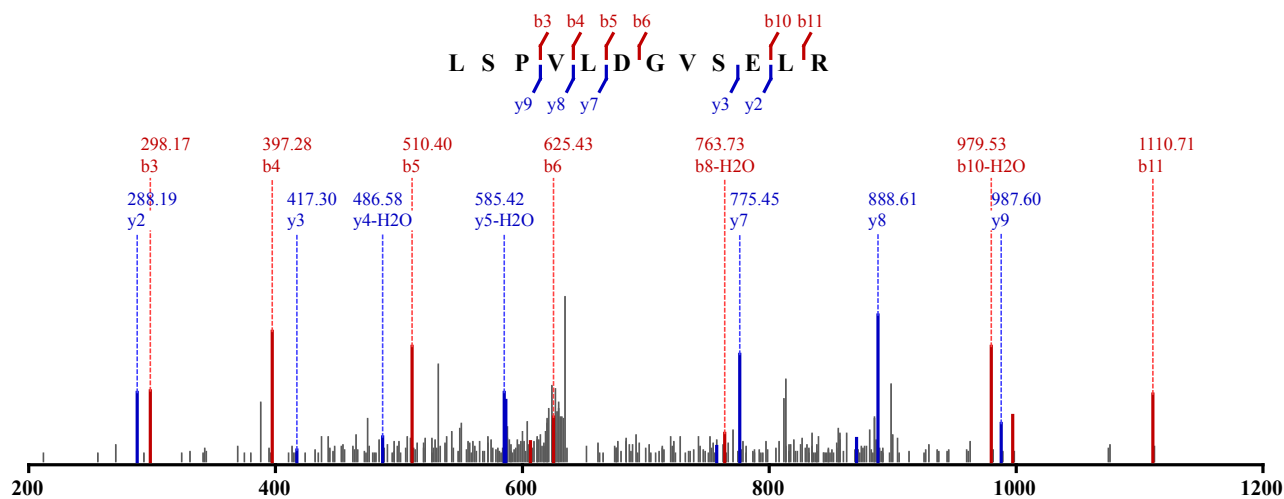

Not Modified

Identified in MSS122 with qvalue 0.00

Charge: 2, Exp. m/z: 642.862, Calc. m/z: 642.862

Data File: HeLa\_try\_HCD\_2, Scans: 49403 - 49403

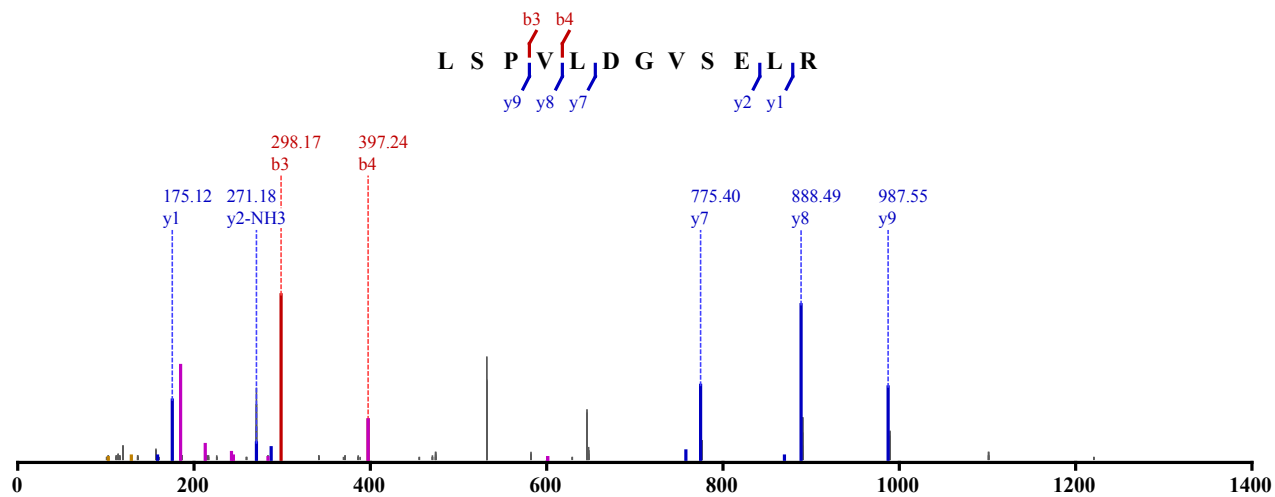

Not Modified

Identified in MSS122 with qvalue 0.00

Charge: 2, Exp. m/z: 642.860, Calc. m/z: 642.862

Data File: HeLa\_try\_HCD\_1, Scans: 48299 - 48299

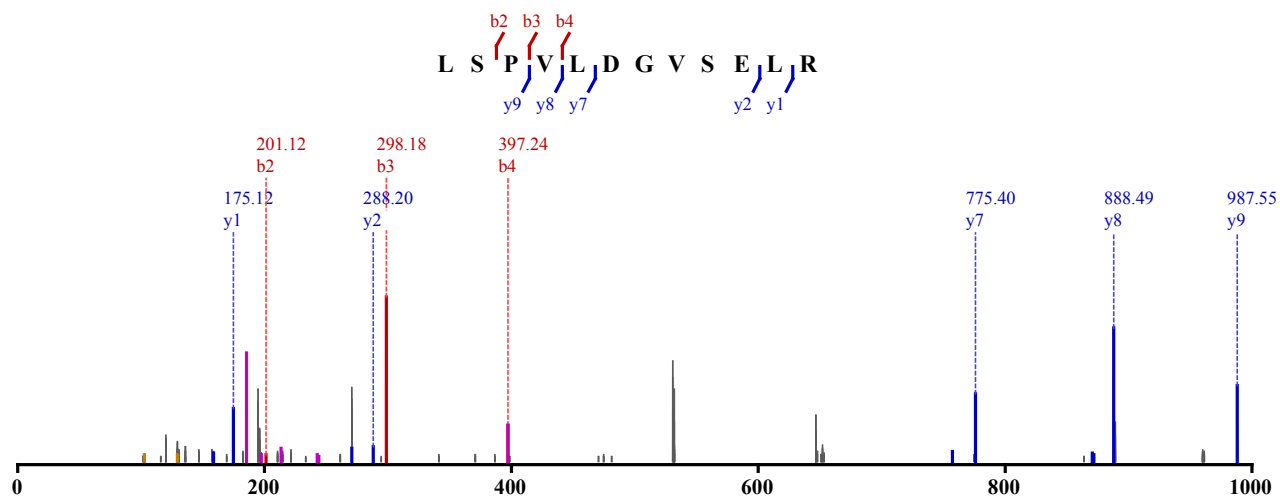

Not Modified

Identified in MSS122 with qvalue 0.00

Charge: 2, Exp. m/z: 642.860, Calc. m/z: 642.862

Data File: HeLa\_try\_HCD\_3, Scans: 48057 - 48057

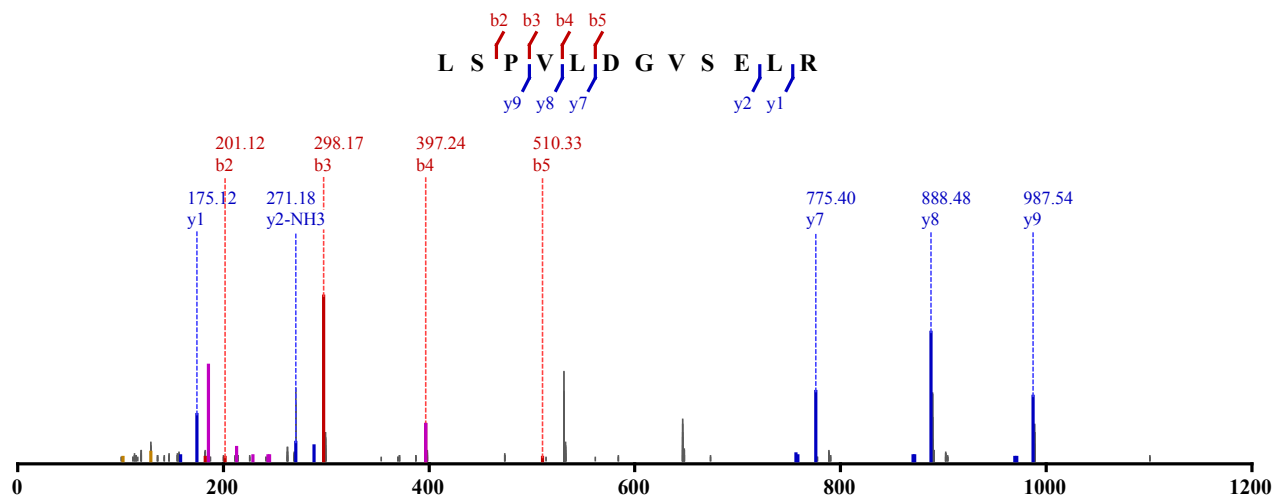

Not Modified

Identified in MSS130 with qvalue 0.00

Charge: 2, Exp. m/z: 642.862, Calc. m/z: 642.862

Data File: HeLa\_LysC-try\_HCD\_1, Scans: 43781 - 43781

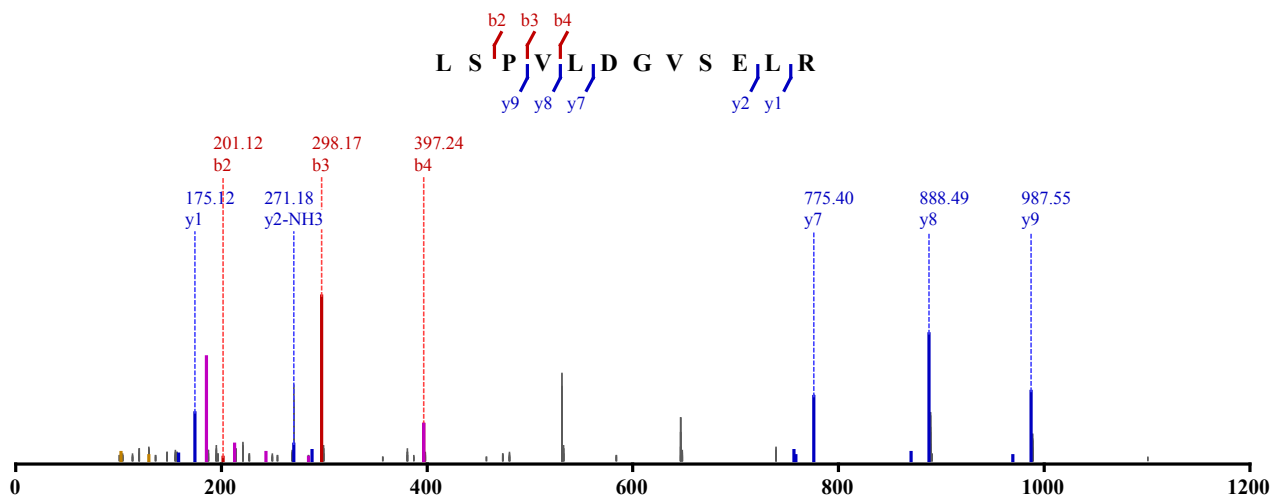

Not Modified

Identified in MSS241 with qvalue 0.00

Charge: 2, Exp. m/z: 642.862, Calc. m/z: 642.862

Data File: HeLa\_try\_CID-ETD\_1, Scans: 32767 - 32767

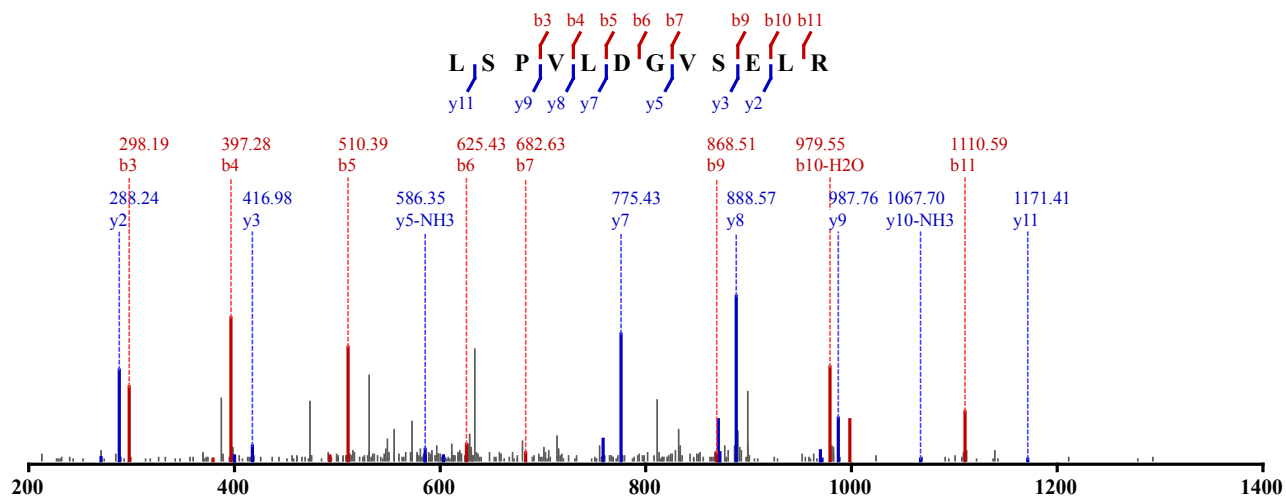

Not Modified

Identified in MSS241 with qvalue 0.00

Charge: 2, Exp. m/z: 642.862, Calc. m/z: 642.862

Data File: HeLa\_try\_CID-ETD\_2, Scans: 29807 - 29807

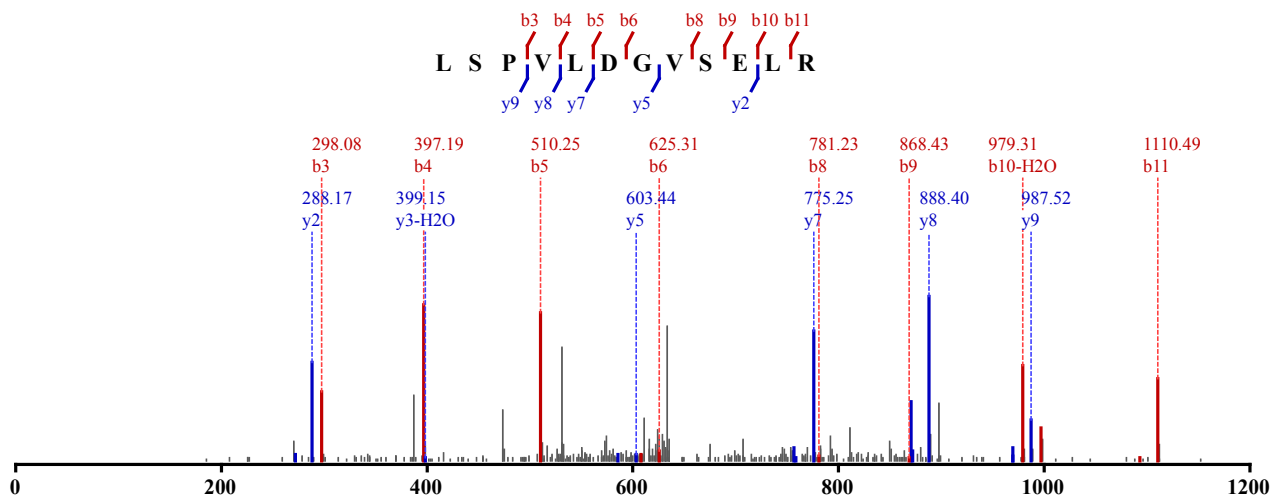

Not Modified

Identified in MSS241 with qvalue 0.00  
 Charge: 2, Exp. m/z: 642.862, Calc. m/z: 642.862  
 Data File: HeLa\_Try\_CID-ETD\_3, Scans: 27704 - 27704

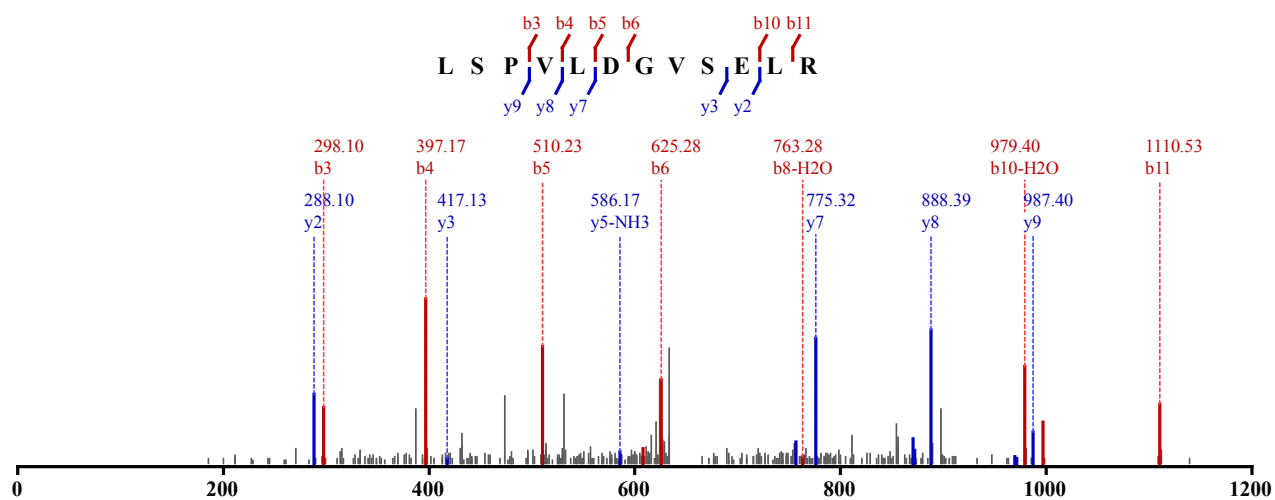

Not Modified  
 Identified in MSS275 with qvalue 0.00  
 Charge: 2, Exp. m/z: 642.863, Calc. m/z: 642.862  
 Data File: HeLa\_ArgC-LysC\_HCD\_1, Scans: 41391 - 41391

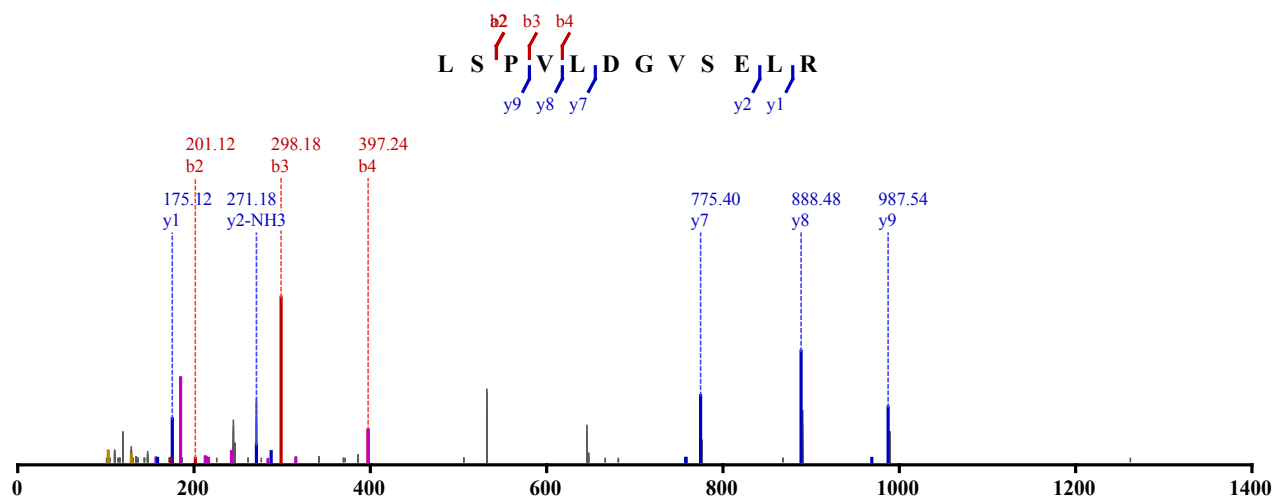

Not Modified  
 Identified in MSS275 with qvalue 0.01  
 Charge: 2, Exp. m/z: 642.861, Calc. m/z: 642.862  
 Data File: HeLa\_ArgC-LysC\_HCD\_2, Scans: 42157 - 42157

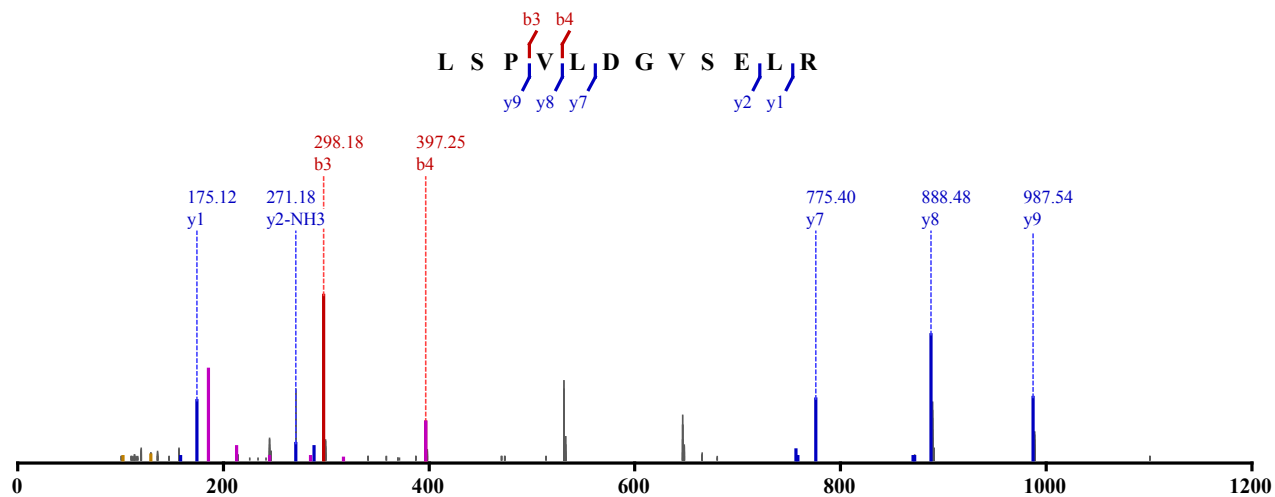

Not Modified

Identified in MSS275 with qvalue 0.00

Charge: 2, Exp. m/z: 642.862, Calc. m/z: 642.862

Data File: HeLa\_ArgC-LysC\_HCD\_3, Scans: 40710 - 40710

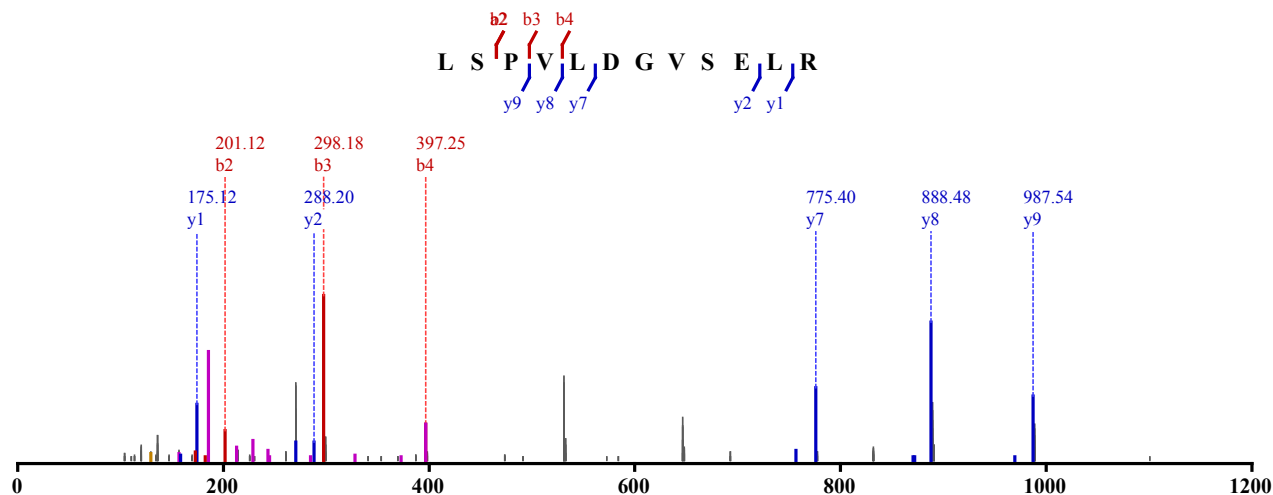

Not Modified

Identified in MSS301 with qvalue 0.00

Charge: 2, Exp. m/z: 642.861, Calc. m/z: 642.862

Data File: HeLa\_ArgC-Try\_HCD\_3, Scans: 41213 - 41213

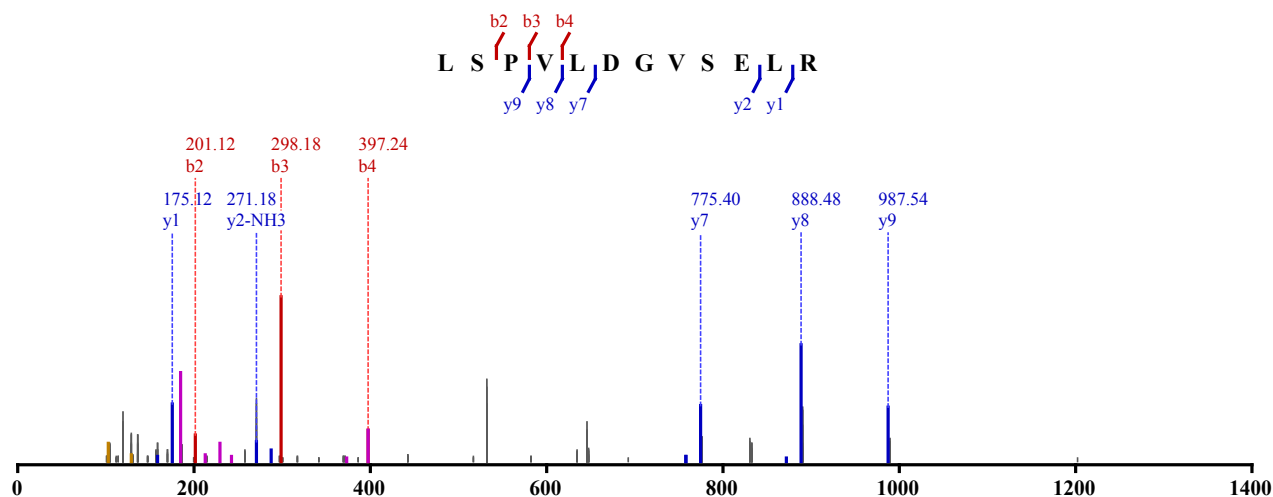

Not Modified

Identified in MSS434 with qvalue 0.00

Charge: 2, Exp. m/z: 642.862, Calc. m/z: 642.862

Data File: HeLa\_LysC-try\_CID-ETD\_2, Scans: 29617 - 29617

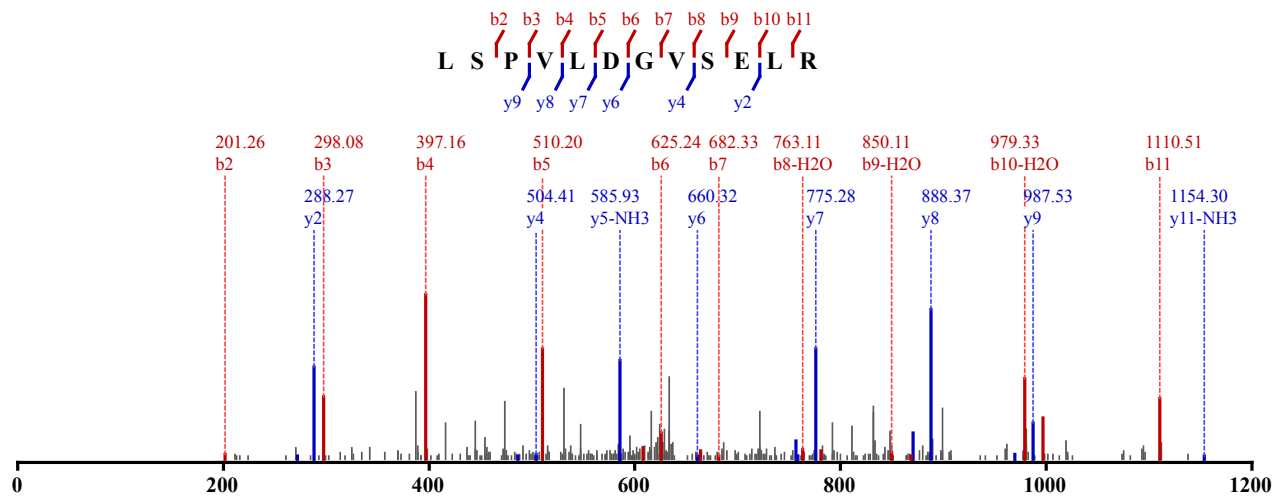

Not Modified

Identified in MSS434 with qvalue 0.00

Charge: 2, Exp. m/z: 642.862, Calc. m/z: 642.862

Data File: HeLa\_LysC-try\_CID-ETD\_1, Scans: 32632 - 32632

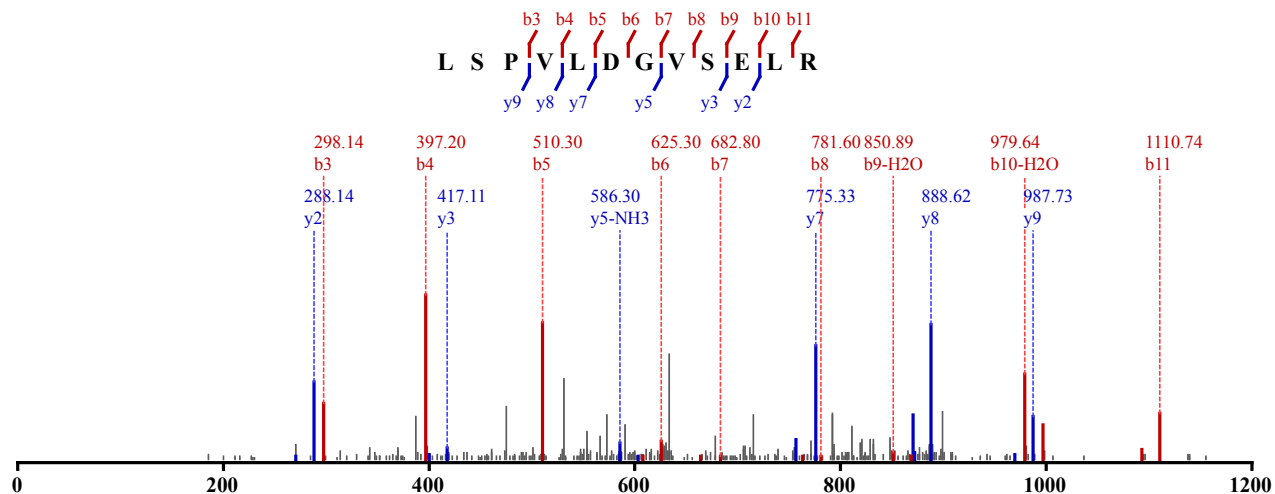

Not Modified

Identified in MSS480 with qvalue 0.00

Charge: 2, Exp. m/z: 642.861, Calc. m/z: 642.862

Data File: HeLa\_try\_pH11\_CID\_3xload\_2, Scans: 61319 - 61319

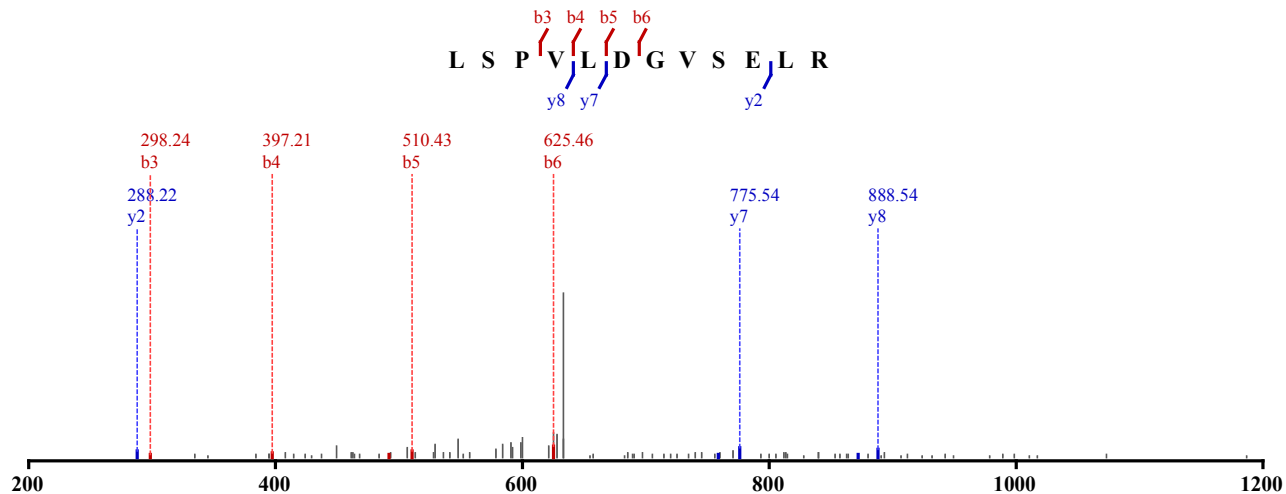

Not Modified

Identified in MSS480 with qvalue 0.00

Charge: 2, Exp. m/z: 642.862, Calc. m/z: 642.862



Data File: HeLa\_try\_pH11\_CID\_3xload, Scans: 55287 - 55287

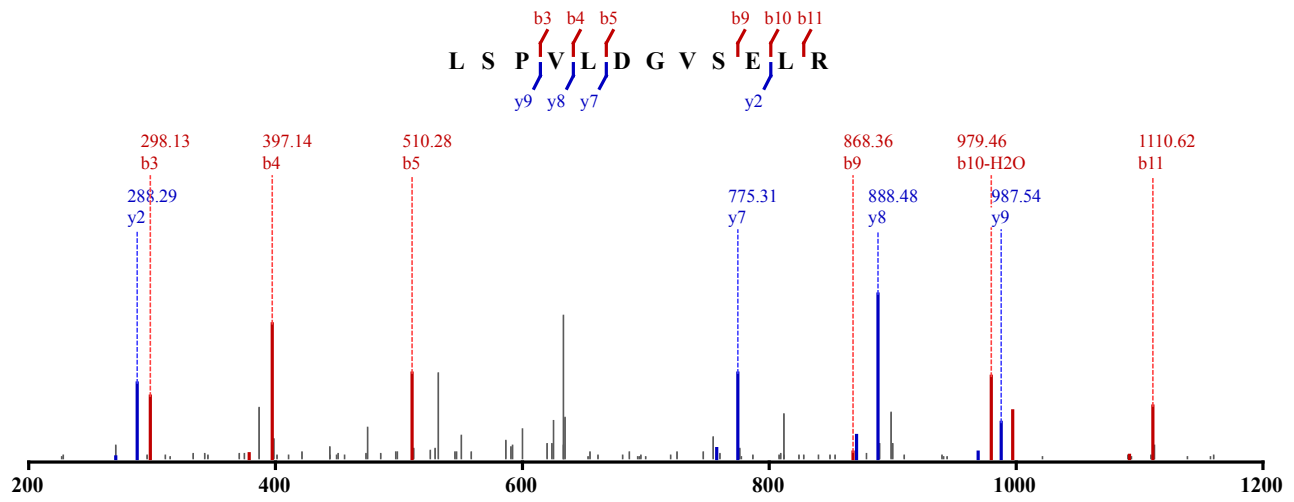

Not Modified

Identified in MSS480 with qvalue 0.00

Charge: 2, Exp. m/z: 642.861, Calc. m/z: 642.862

Data File: HeLa\_try\_pH8\_CID\_3xload\_2, Scans: 54046 - 54046

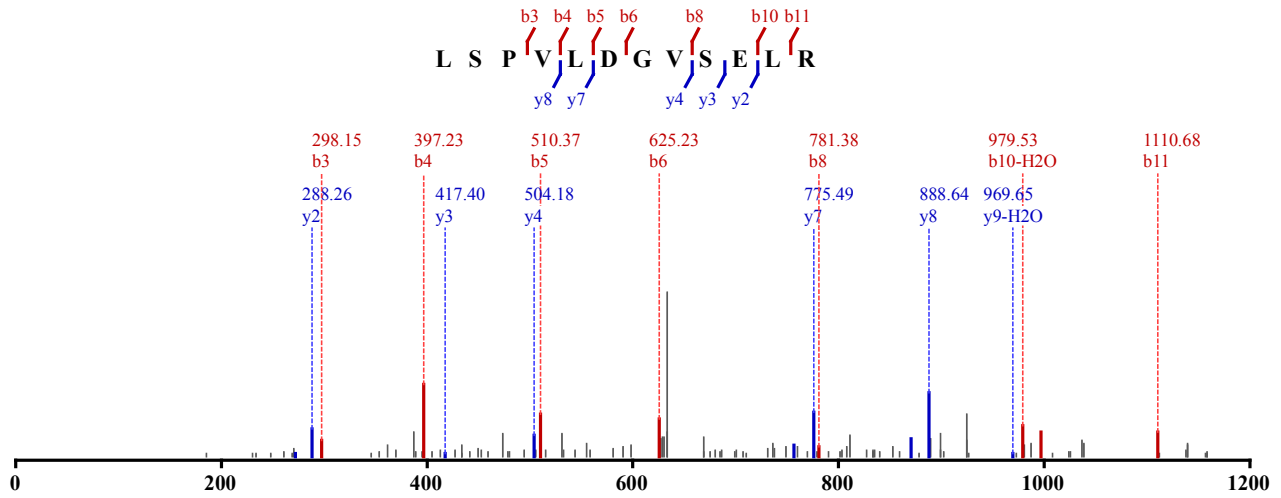

Not Modified

Identified in MSS480 with qvalue 0.00

Charge: 2, Exp. m/z: 642.862, Calc. m/z: 642.862

Data File: HeLa\_try\_pH8\_CID\_3xload\_2, Scans: 54206 - 54206

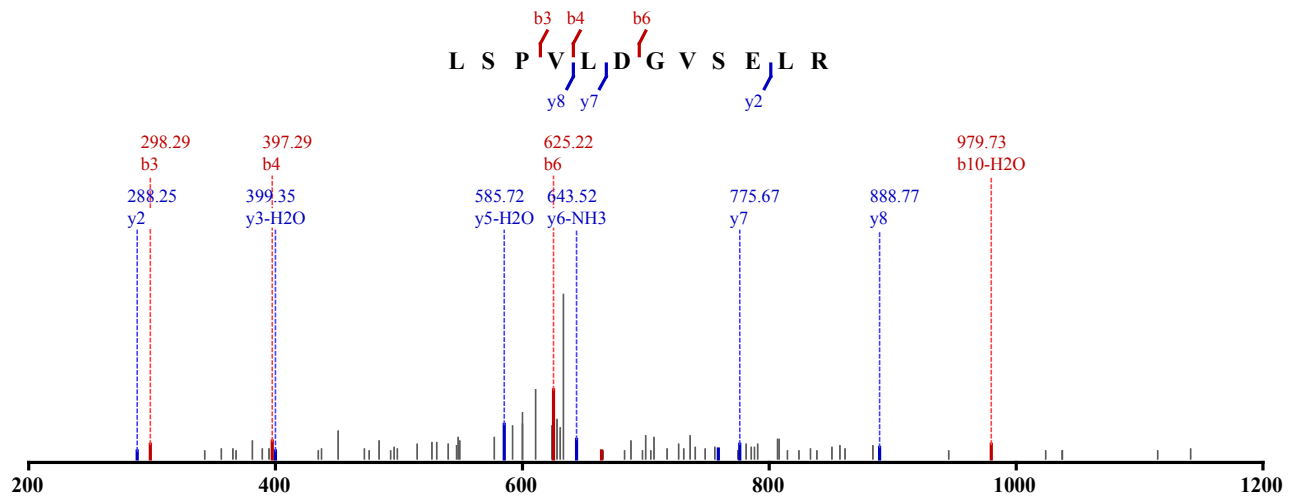

Not Modified

Identified in MSS480 with qvalue 0.00  
 Charge: 2, Exp. m/z: 642.862, Calc. m/z: 642.862  
 Data File: HeLa\_try\_pH8\_CID\_3xload, Scans: 48807 - 48807

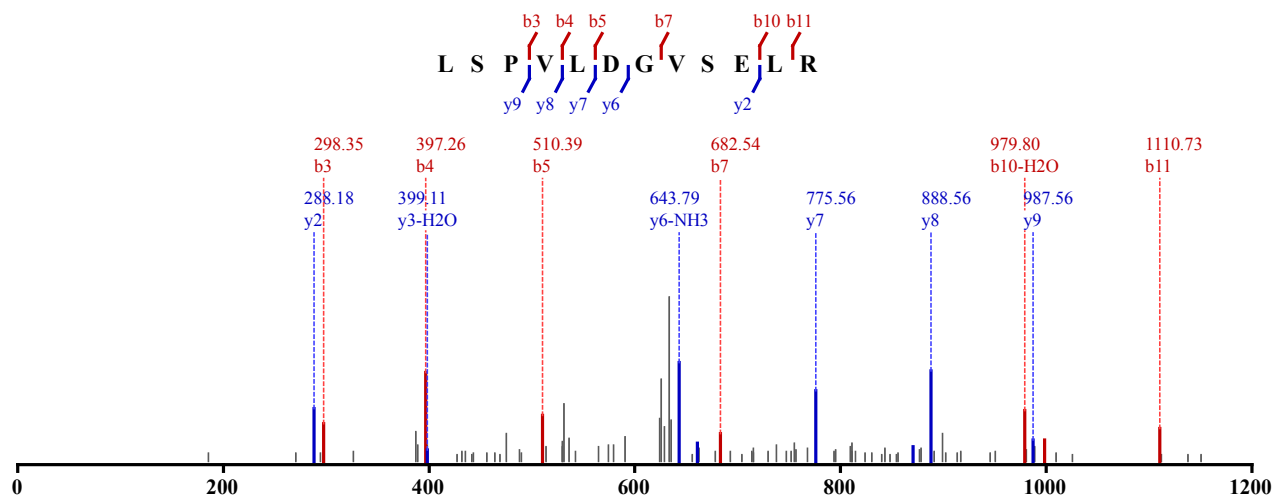

Not Modified  
 Identified in MSS480 with qvalue 0.01  
 Charge: 2, Exp. m/z: 643.364, Calc. m/z: 642.862  
 Data File: HeLa\_try\_pH8\_CID\_3xload, Scans: 49019 - 49019

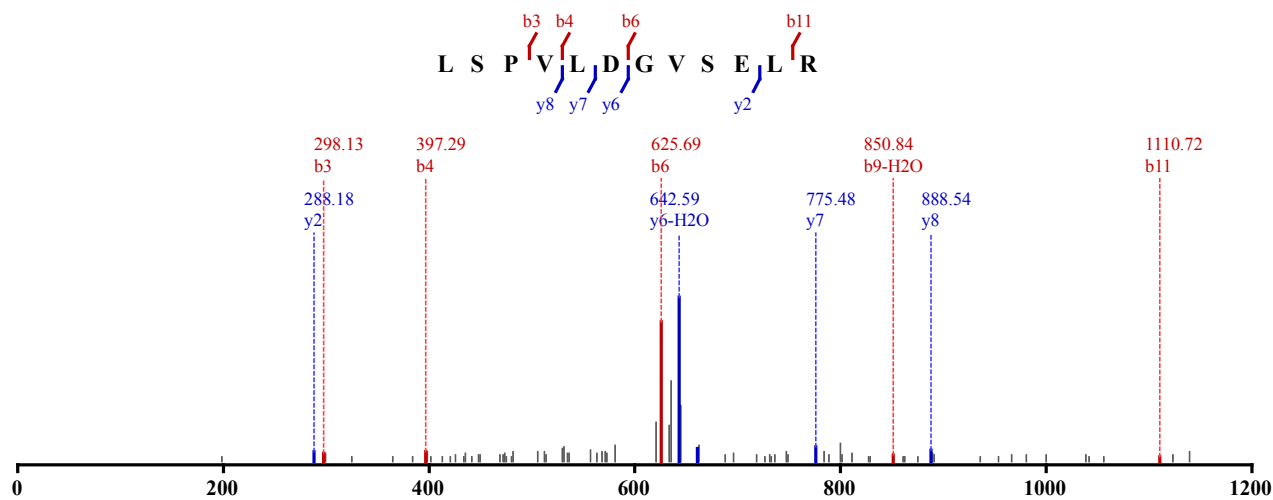

1 x Oxidation (M)  
 Identified in MSS483 with qvalue 0.00  
 Charge: 2, Exp. m/z: 649.837, Calc. m/z: 649.837  
 Data File: HeLa\_AspN\_pH11\_CID\_3xload, Scans: 33159 - 33159

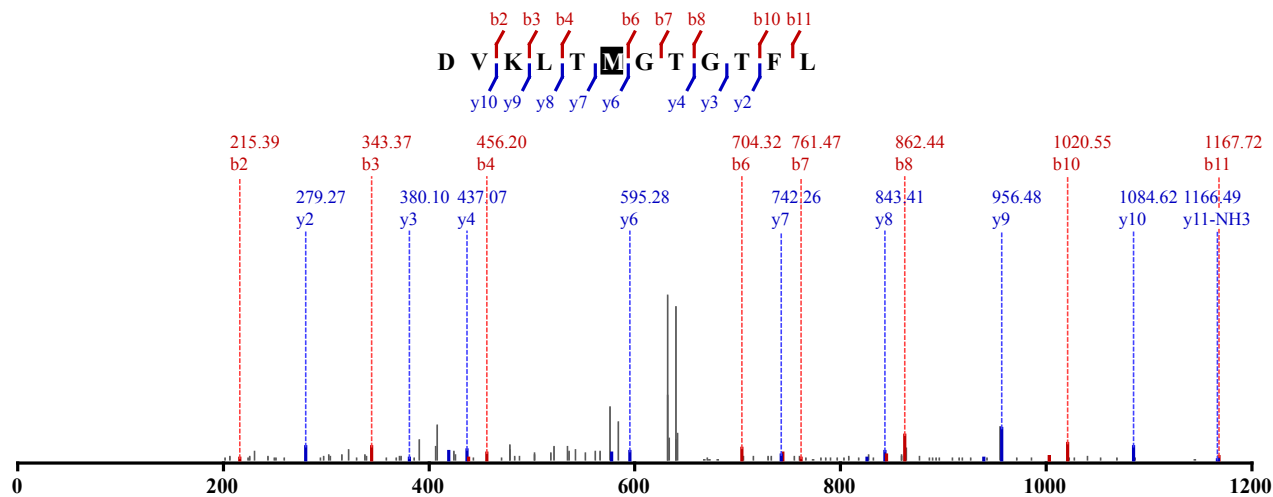

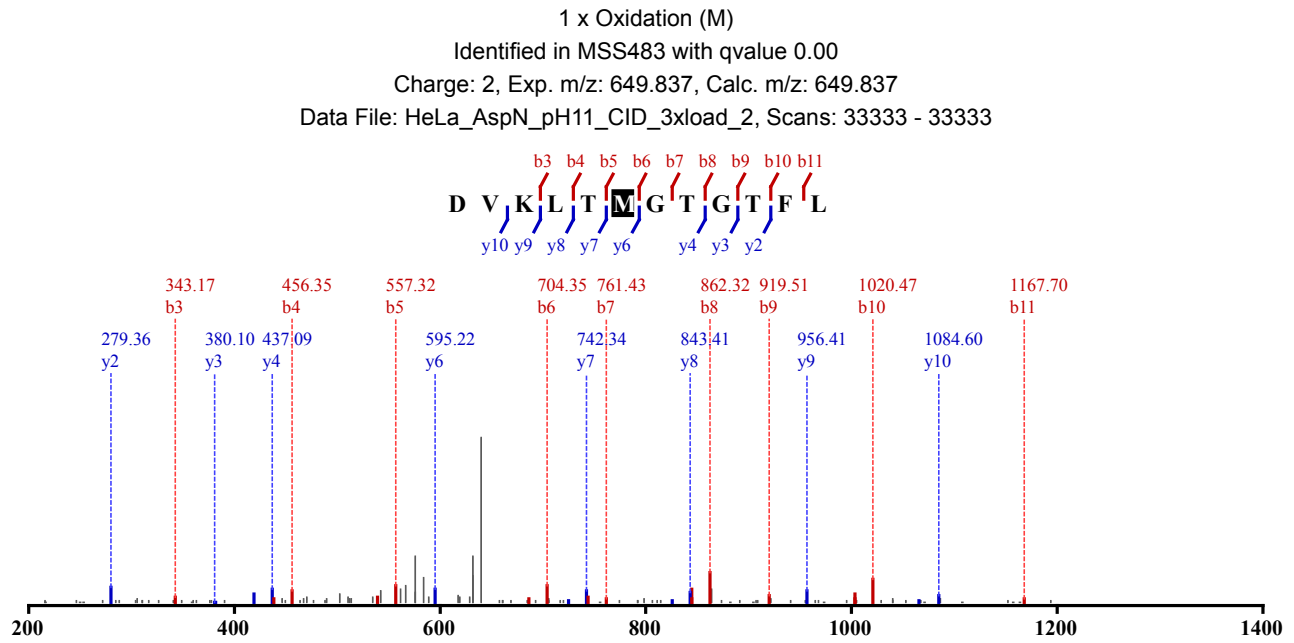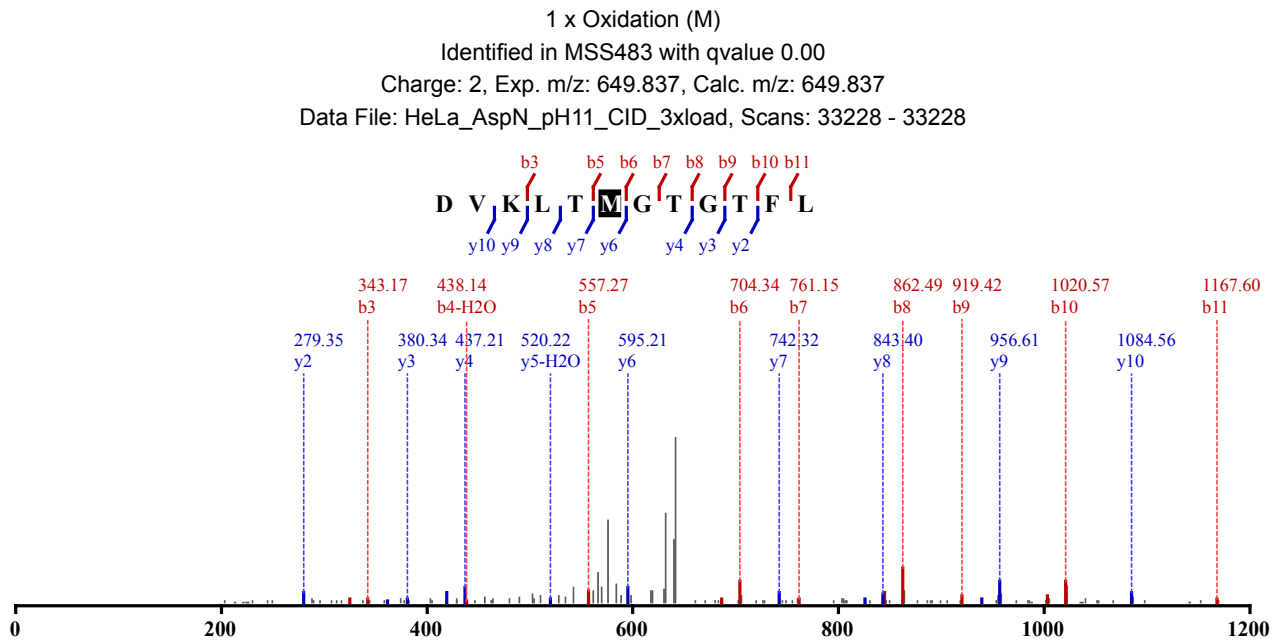

1 x Oxidation (M)  
 Identified in MSS483 with qvalue 0.00  
 Charge: 2, Exp. m/z: 649.838, Calc. m/z: 649.837  
 Data File: HeLa\_AspN\_pH8\_CID\_3xload, Scans: 30316 - 30316

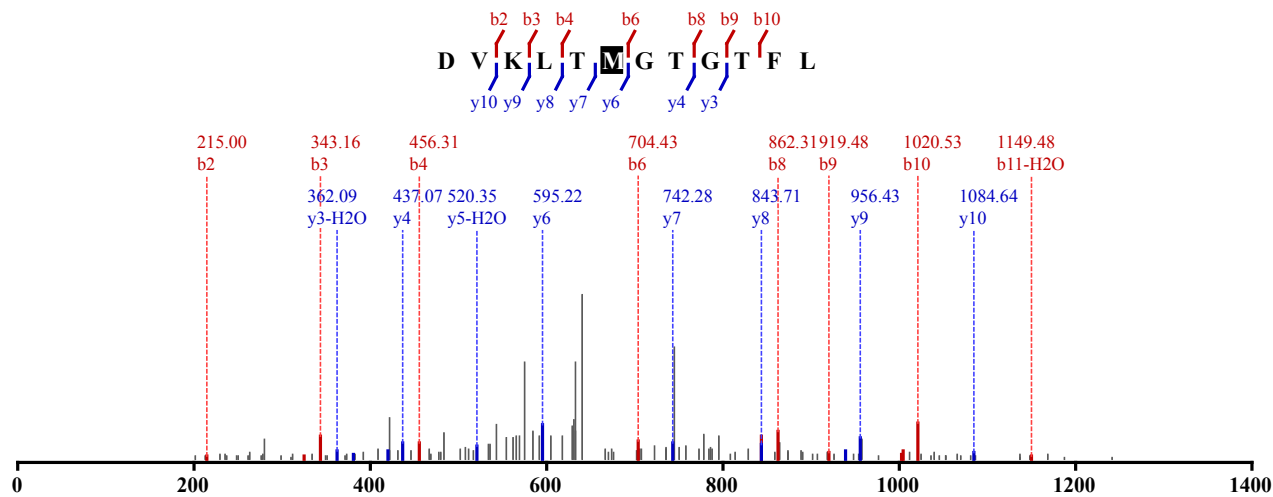

Not Modified

Identified in MSS479 with qvalue 0.00

Charge: 2, Exp. m/z: 596.323, Calc. m/z: 596.322

Data File: HeLa\_AspN\_pH6\_HCD\_1, Scans: 41285 - 41285

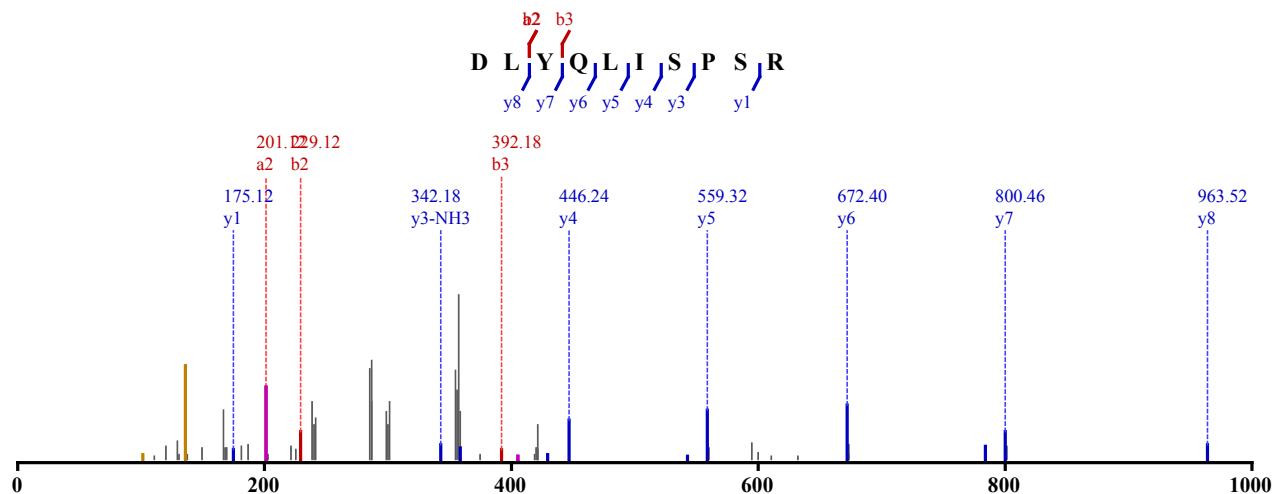

Not Modified

Identified in MSS479 with qvalue 0.00

Charge: 2, Exp. m/z: 596.323, Calc. m/z: 596.322

Data File: HeLa\_AspN\_pH6\_HCD\_3, Scans: 39635 - 39635

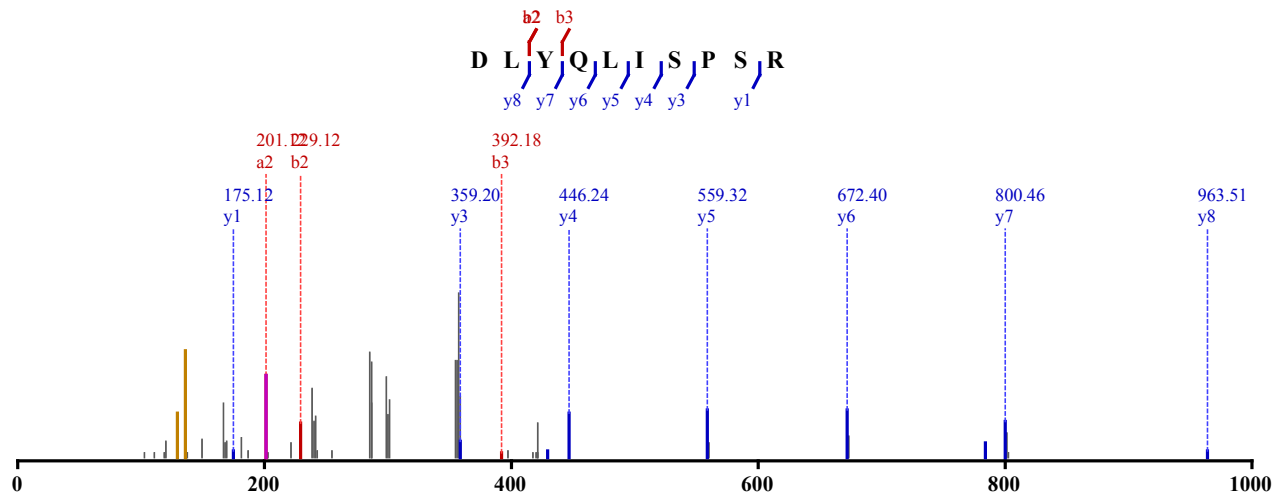

Not Modified

Identified in MSS483 with qvalue 0.00

Charge: 2, Exp. m/z: 596.323, Calc. m/z: 596.322

Data File: HeLa\_AspN\_pH8\_CID\_3xload\_2, Scans: 31906 - 31906

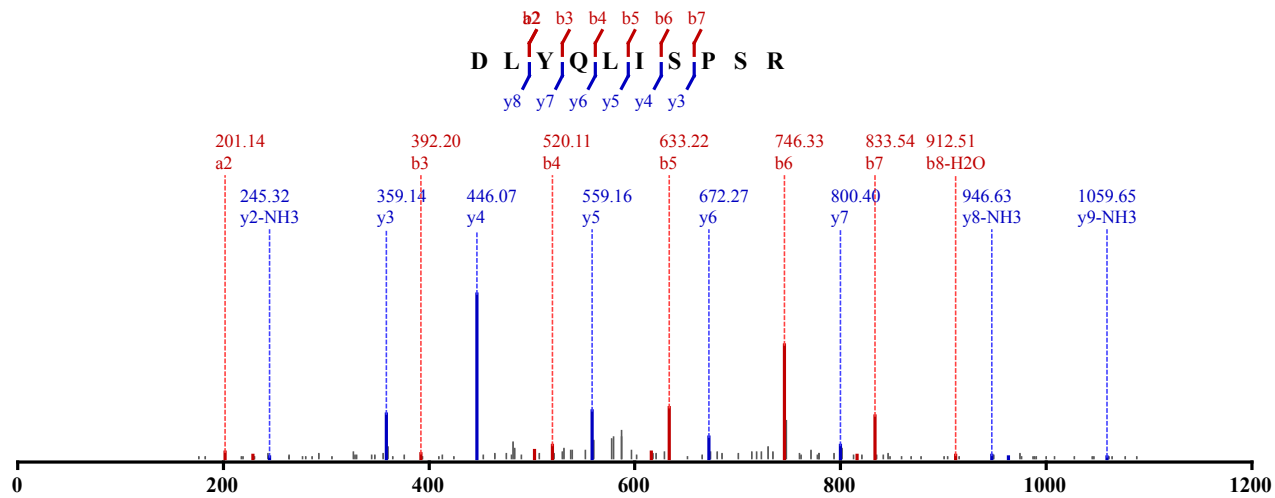

Not Modified

Identified in MSS483 with qvalue 0.00

Charge: 2, Exp. m/z: 596.322, Calc. m/z: 596.322

Data File: HeLa\_AspN\_pH8\_CID\_3xload, Scans: 32113 - 32113

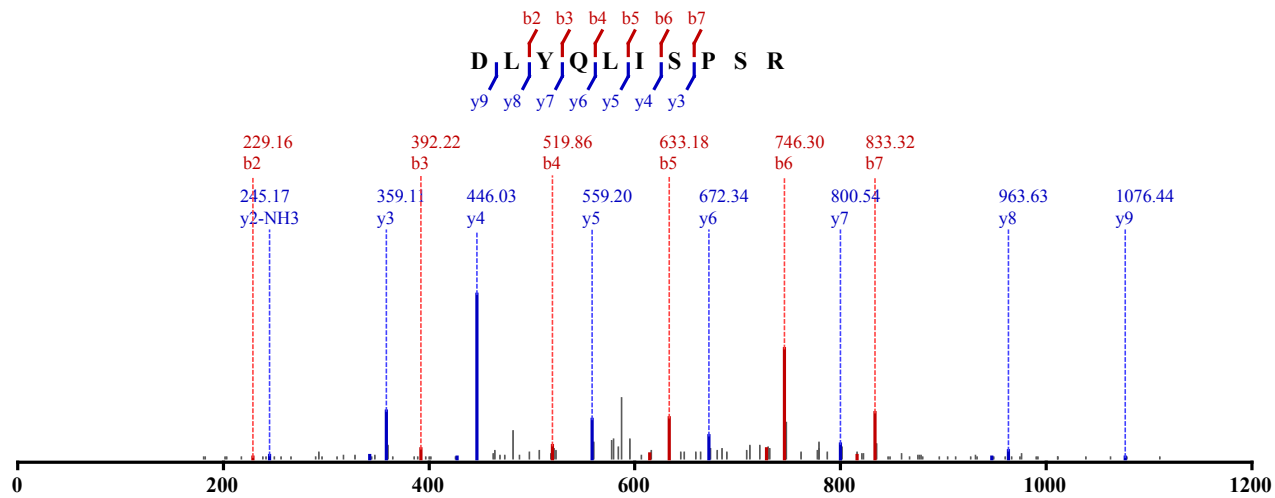

Not Modified

Identified in MSS483 with qvalue 0.00

Charge: 2, Exp. m/z: 596.322, Calc. m/z: 596.322

Data File: HeLa\_AspN\_pH8\_CID\_3xload, Scans: 32187 - 32187

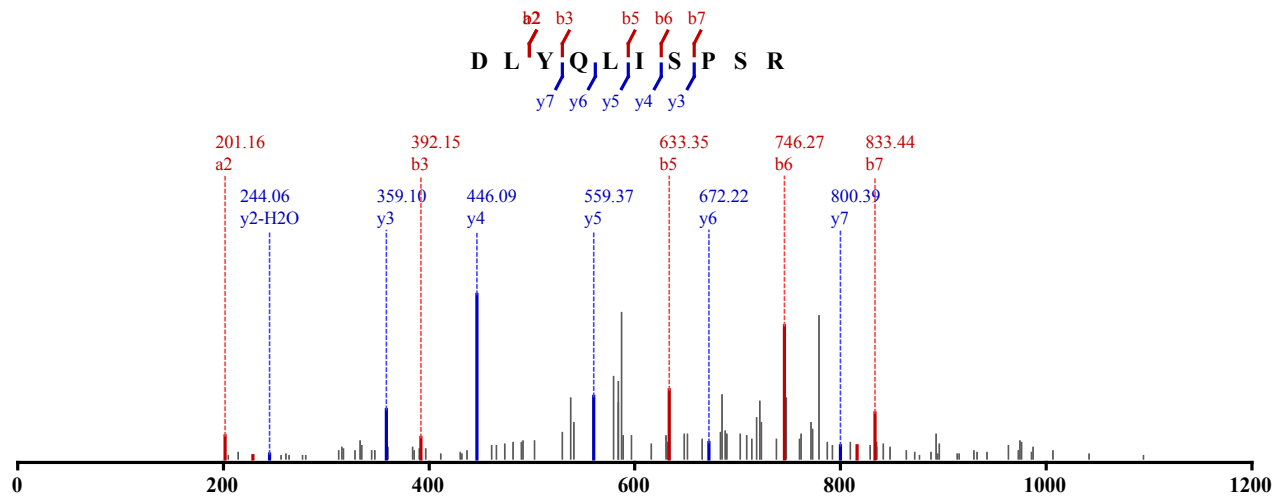

Not Modified

Identified in MSS479 with qvalue 0.00  
 Charge: 4, Exp. m/z: 421.218, Calc. m/z: 421.217  
 Data File: HeLa\_AspN\_pH6\_HCD\_1, Scans: 19907 - 19907

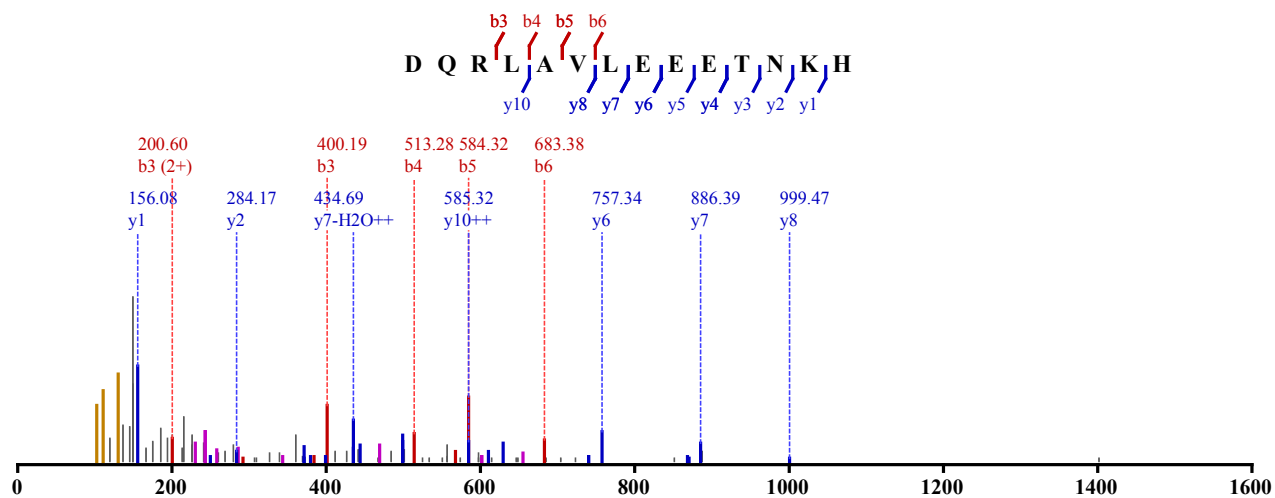

Not Modified  
 Identified in MSS479 with qvalue 0.00  
 Charge: 4, Exp. m/z: 421.218, Calc. m/z: 421.217  
 Data File: HeLa\_AspN\_pH6\_HCD\_2, Scans: 19137 - 19137

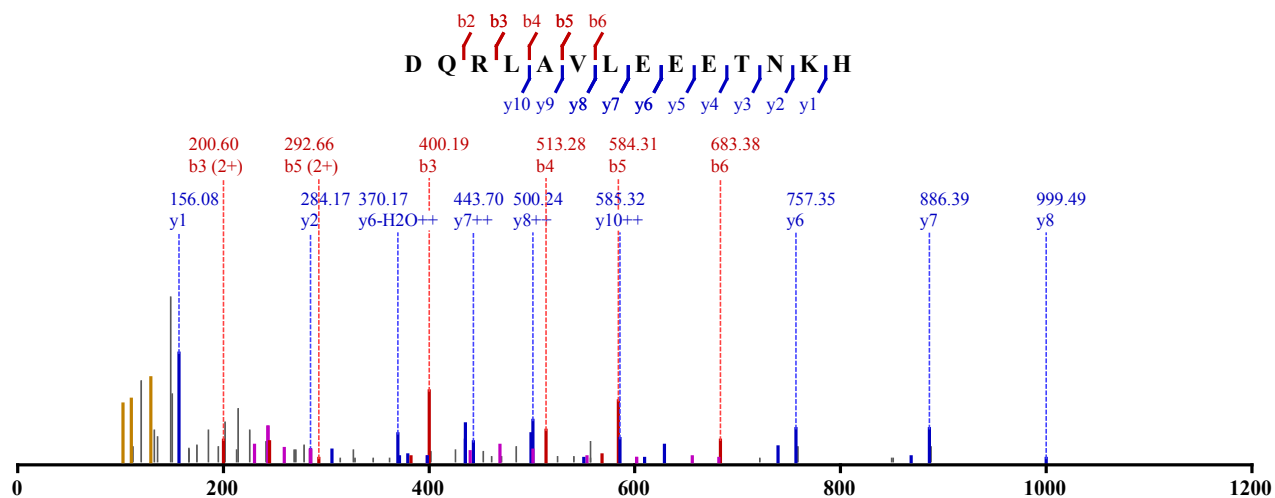

Not Modified  
 Identified in MSS479 with qvalue 0.00  
 Charge: 4, Exp. m/z: 421.218, Calc. m/z: 421.217  
 Data File: HeLa\_AspN\_pH6\_HCD\_3, Scans: 18774 - 18774

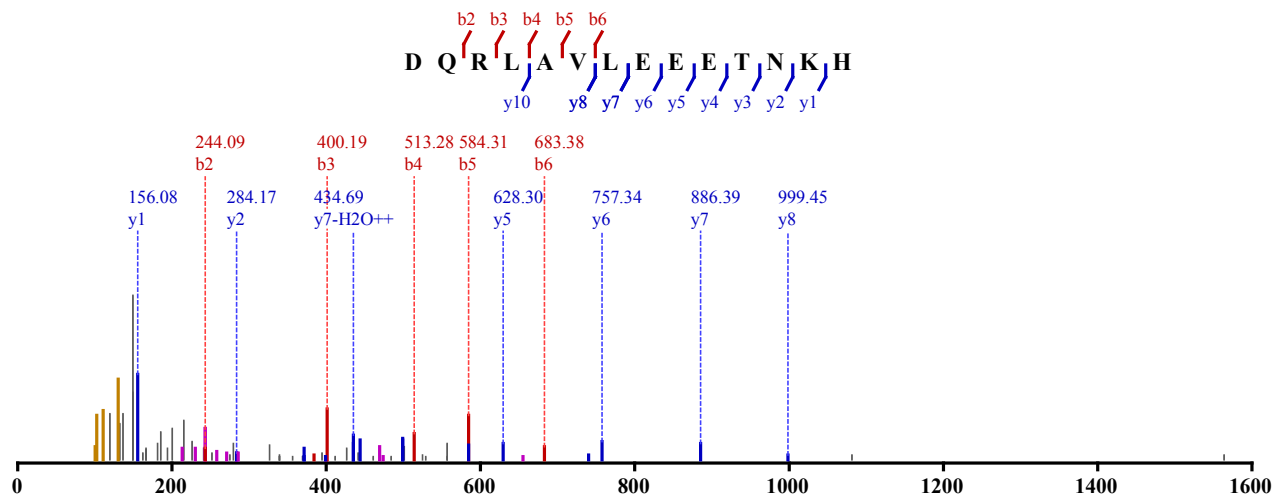

Not Modified

Identified in MSS479 with qvalue 0.00

Charge: 2, Exp. m/z: 638.290, Calc. m/z: 638.287

Data File: HeLa\_AspN\_pH3\_HCD\_1, Scans: 16105 - 16105

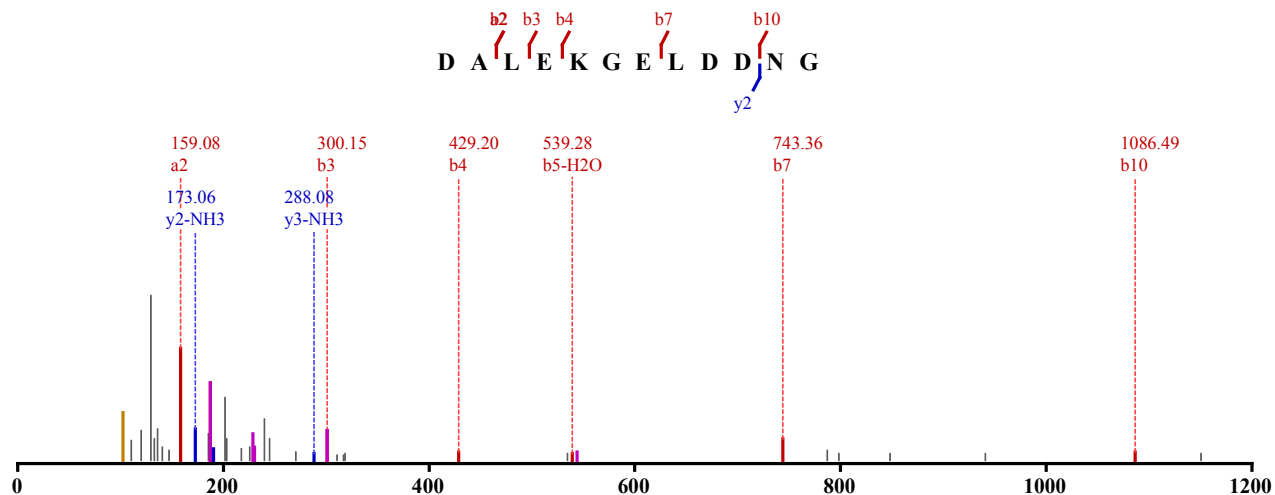

Not Modified

Identified in MSS479 with qvalue 0.00

Charge: 2, Exp. m/z: 638.288, Calc. m/z: 638.287

Data File: HeLa\_AspN\_pH3\_HCD\_3, Scans: 15265 - 15265

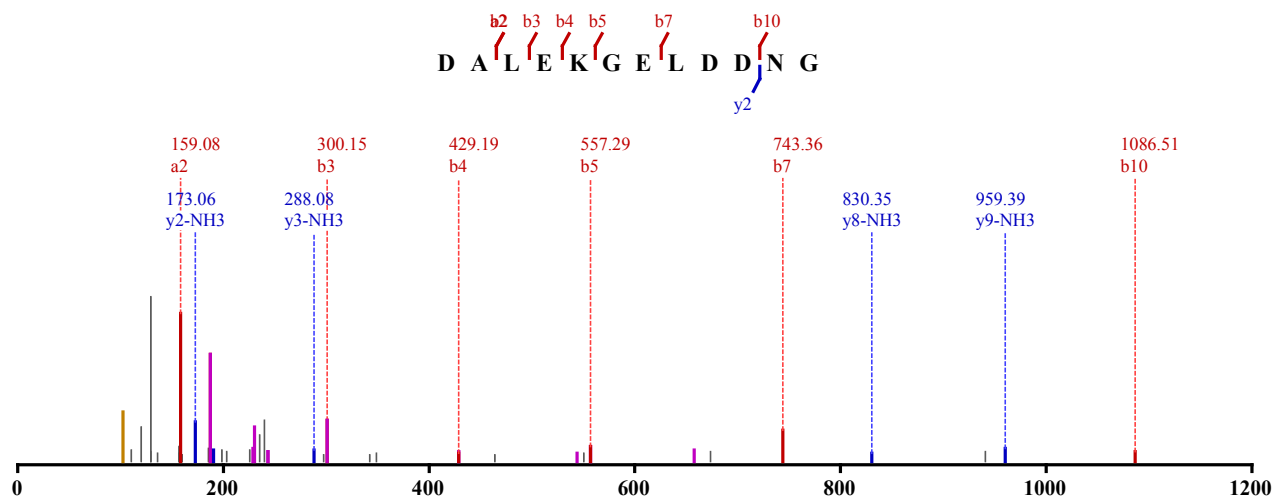

Not Modified

Identified in MSS483 with qvalue 0.00

Charge: 2, Exp. m/z: 638.288, Calc. m/z: 638.287

Data File: HeLa\_AspN\_pH3\_CID\_3xload\_2, Scans: 10510 - 10510

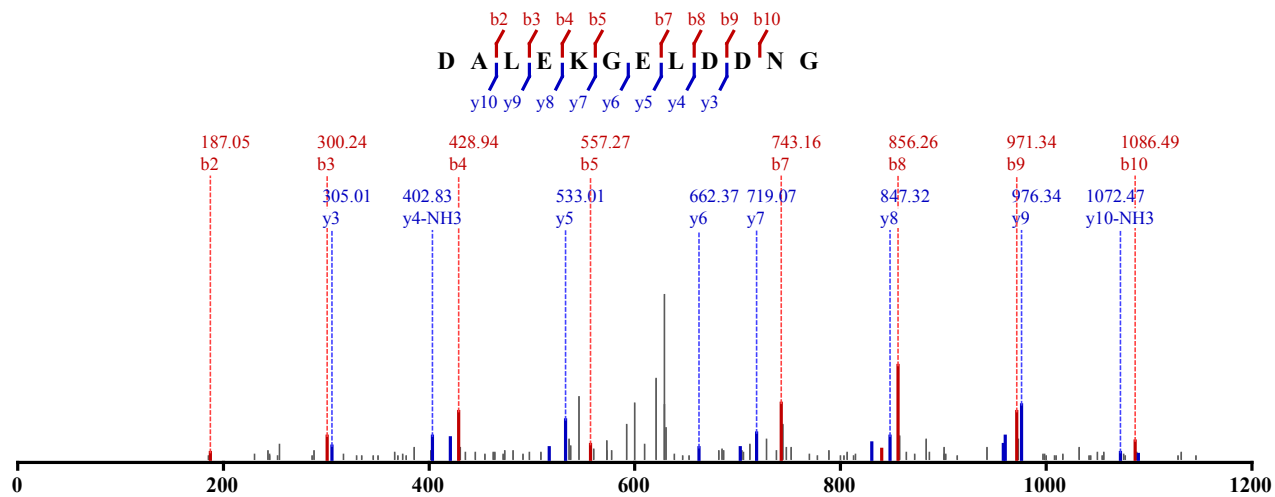

Not Modified

Identified in MSS479 with qvalue 0.00

Charge: 2, Exp. m/z: 609.802, Calc. m/z: 609.802

Data File: HeLa\_AspN\_pH11\_HCD\_3, Scans: 5036 - 5036

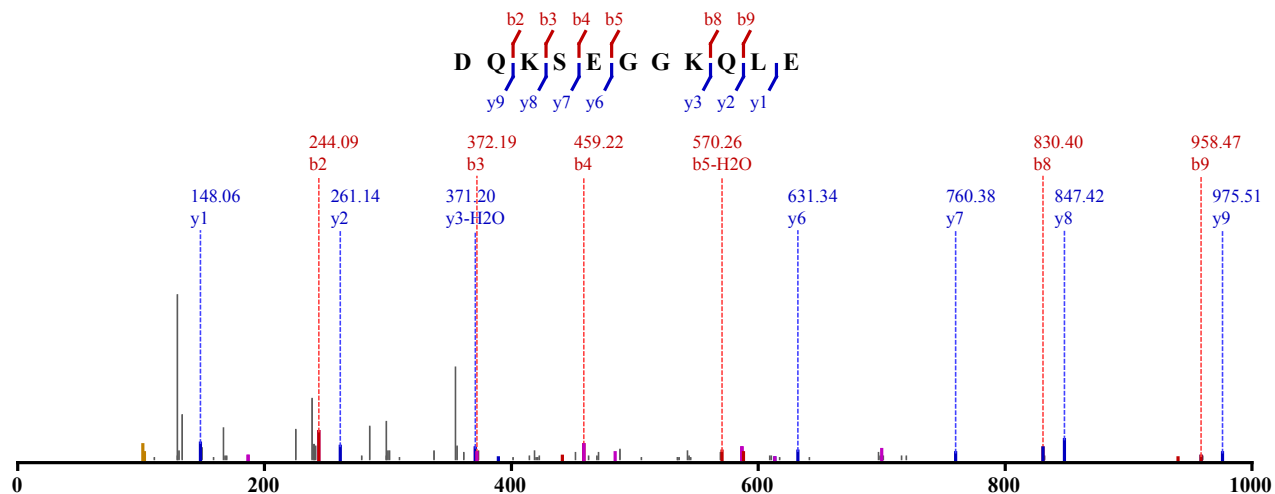

Not Modified

Identified in MSS479 with qvalue 0.00

Charge: 2, Exp. m/z: 609.801, Calc. m/z: 609.802

Data File: HeLa\_AspN\_pH11\_HCD\_2, Scans: 5098 - 5098

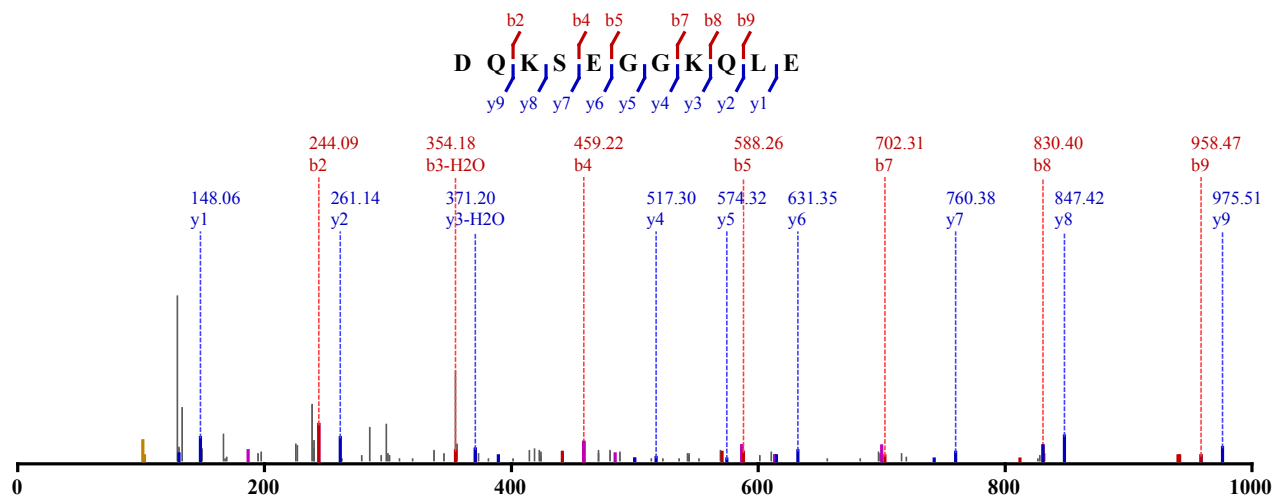

Not Modified

Identified in MSS30 with qvalue 0.00

Charge: 2, Exp. m/z: 415.267, Calc. m/z: 415.268



Data File: 20100726\_Velos1\_TaGe\_SA\_HeLa\_4, Scans: 17750 - 17750

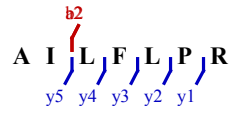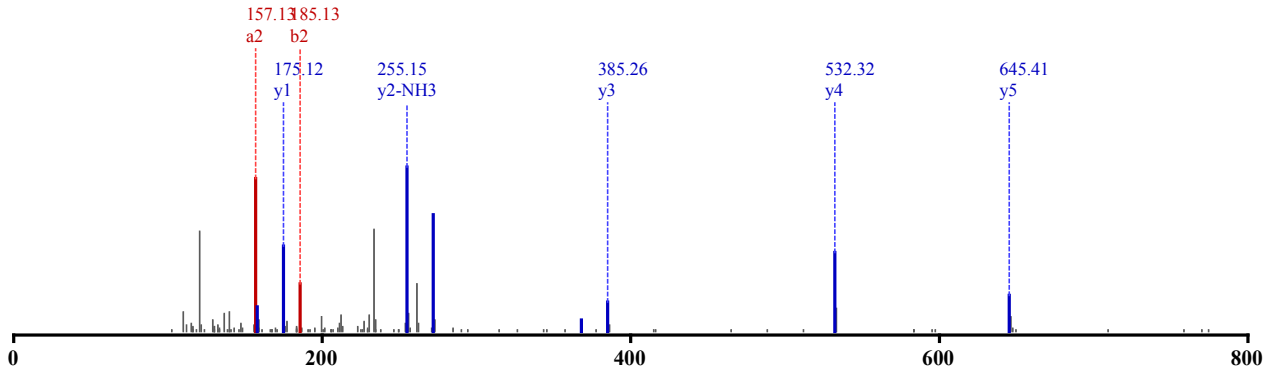

Not Modified

Identified in MSS30 with qvalue 0.00

Charge: 2, Exp. m/z: 415.269, Calc. m/z: 415.268

Data File: 20101224\_Velos1\_TaGe\_SA\_HeLa\_04, Scans: 20090 - 20090

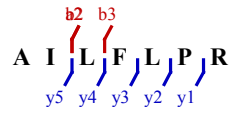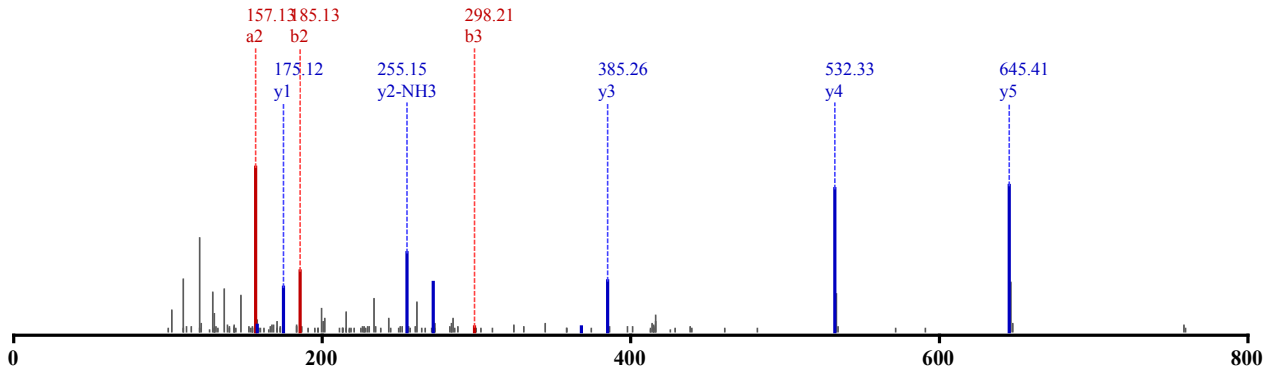

Not Modified

Identified in MSS30 with qvalue 0.00

Charge: 2, Exp. m/z: 415.269, Calc. m/z: 415.268

Data File: 20101224\_Velos1\_TaGe\_SA\_HeLa\_05, Scans: 20100 - 20100

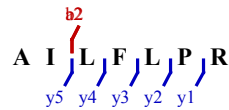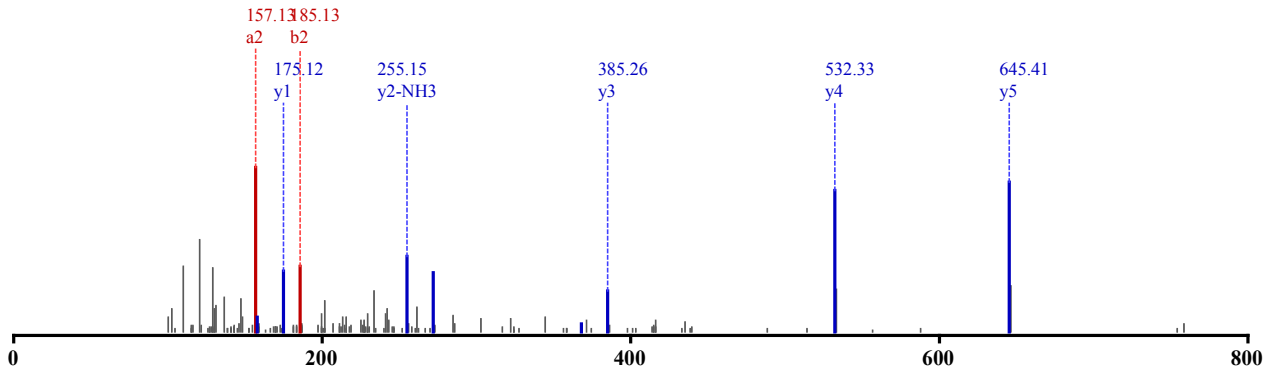

Not Modified

Identified in MSS66 with qvalue 0.00  
 Charge: 2, Exp. m/z: 415.269, Calc. m/z: 415.268  
 Data File: HeLa\_AET\_CID\_1, Scans: 37167 - 37167

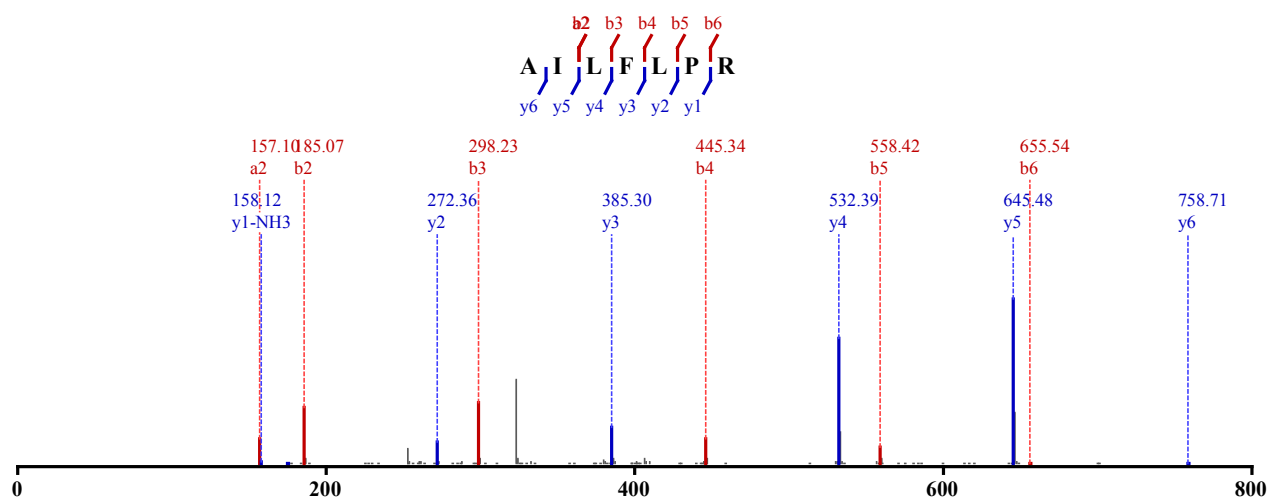

Not Modified  
 Identified in MSS66 with qvalue 0.01  
 Charge: 2, Exp. m/z: 415.269, Calc. m/z: 415.268  
 Data File: HeLa\_AET\_CID\_1, Scans: 37282 - 37282

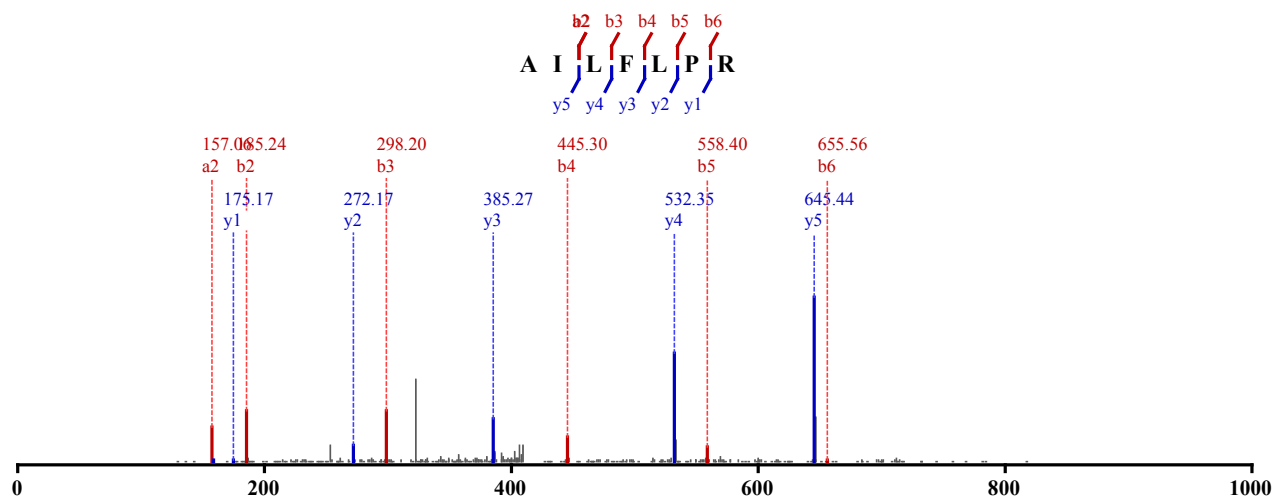

Not Modified  
 Identified in MSS70 with qvalue 0.00  
 Charge: 2, Exp. m/z: 415.268, Calc. m/z: 415.268  
 Data File: HeLa\_AGT\_CID\_1, Scans: 37108 - 37108

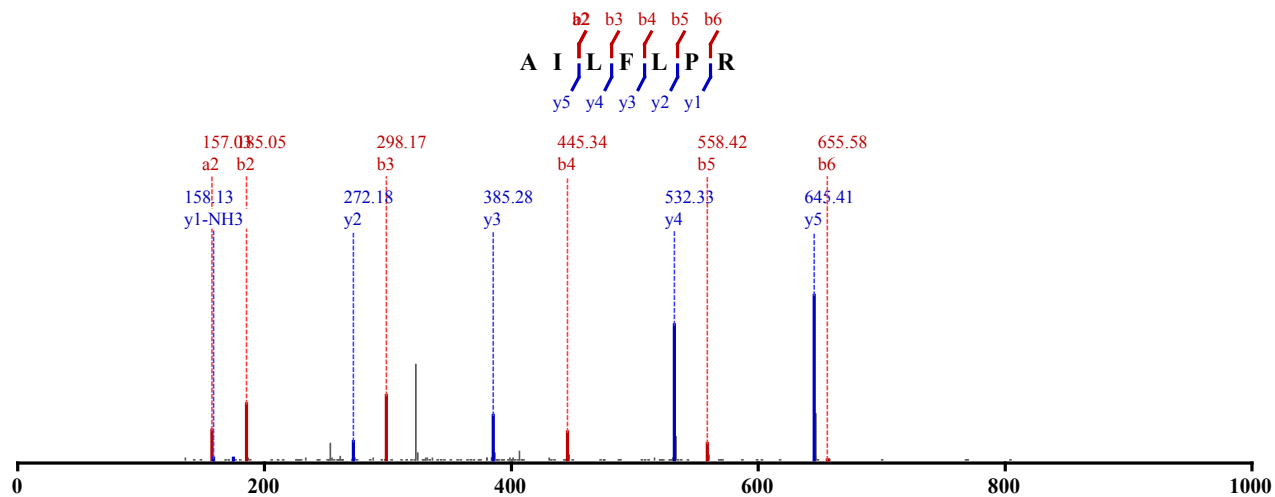

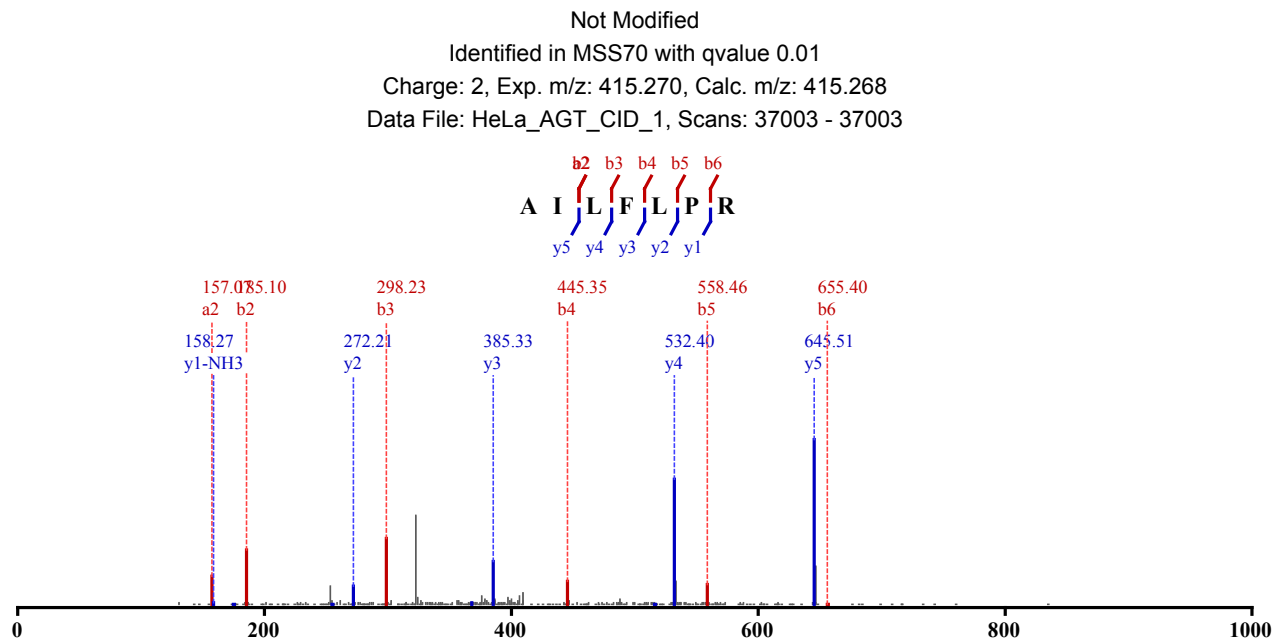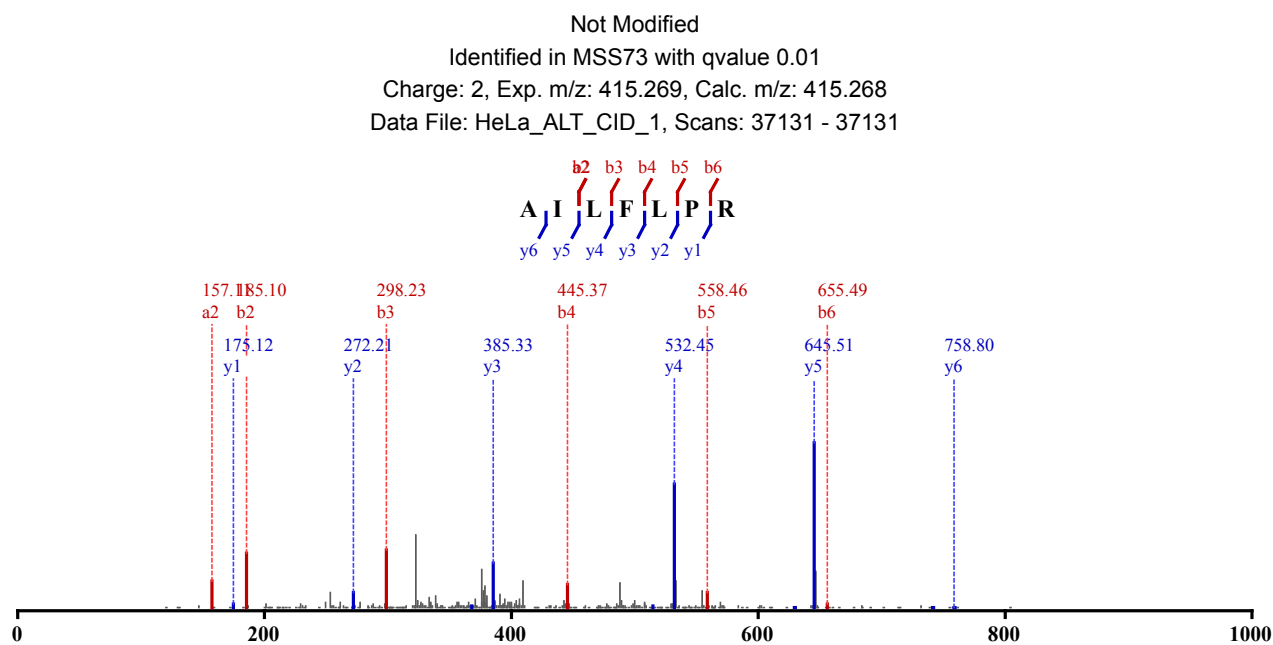

Not Modified  
 Identified in MSS73 with qvalue 0.01  
 Charge: 2, Exp. m/z: 415.269, Calc. m/z: 415.268  
 Data File: HeLa\_ALT\_CID\_1, Scans: 37239 - 37239

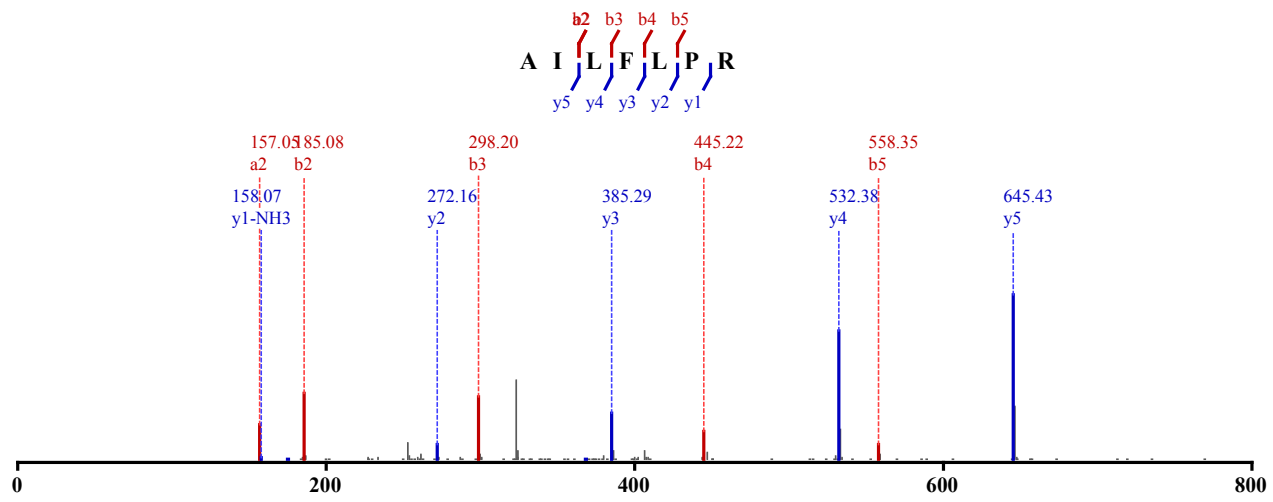

Not Modified

Identified in MSS79 with qvalue 0.01

Charge: 2, Exp. m/z: 415.268, Calc. m/z: 415.268

Data File: HeLa\_AspN-Try\_CID\_1, Scans: 37759 - 37759

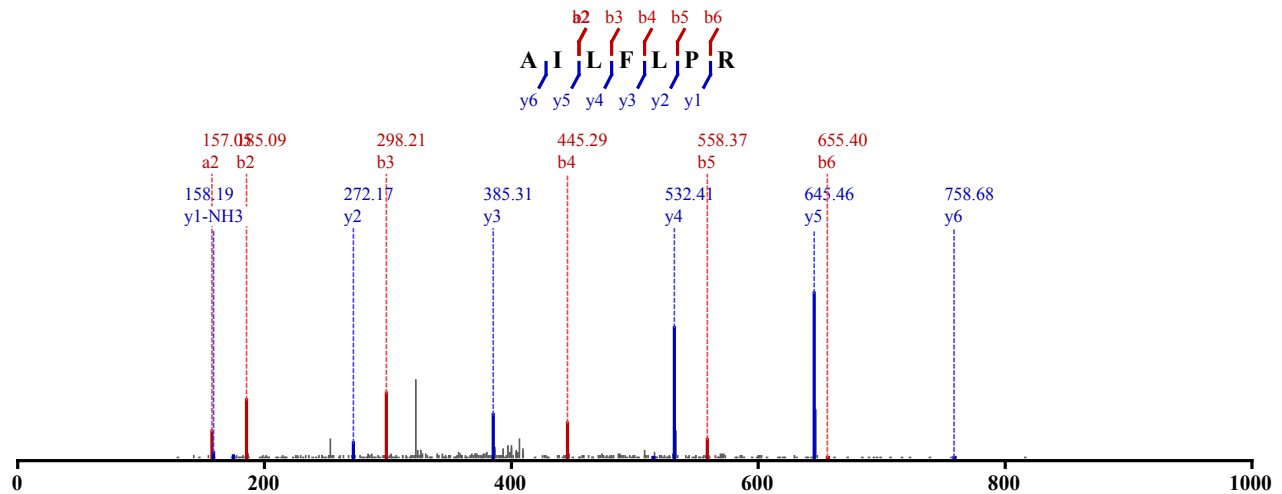

Not Modified

Identified in MSS79 with qvalue 0.00

Charge: 2, Exp. m/z: 415.269, Calc. m/z: 415.268

Data File: HeLa\_AspN-Try\_CID\_1, Scans: 37637 - 37637

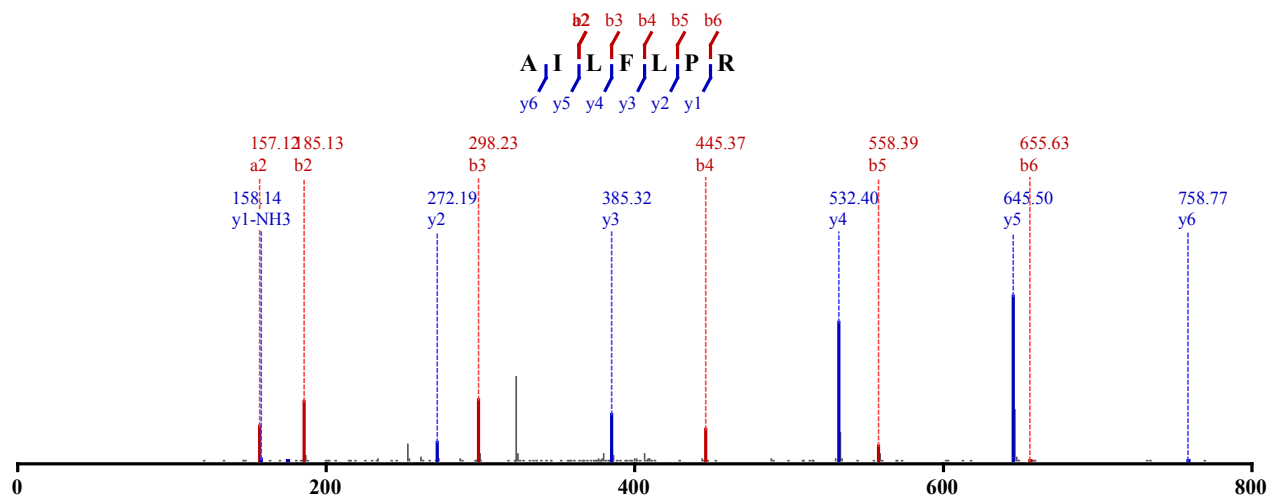

Not Modified

Identified in MSS79 with qvalue 0.01

Charge: 2, Exp. m/z: 415.268, Calc. m/z: 415.268

Data File: HeLa\_AspN-Try\_CID\_2, Scans: 38281 - 38281

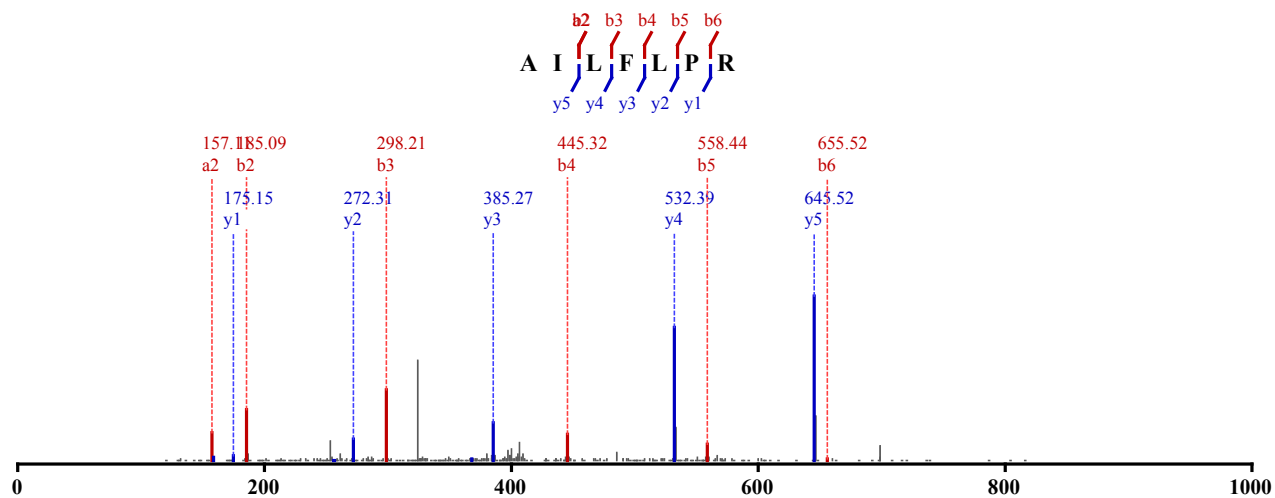

Not Modified

Identified in MSS79 with qvalue 0.00

Charge: 2, Exp. m/z: 415.269, Calc. m/z: 415.268

Data File: HeLa\_AspN-Try\_CID\_3, Scans: 38323 - 38323

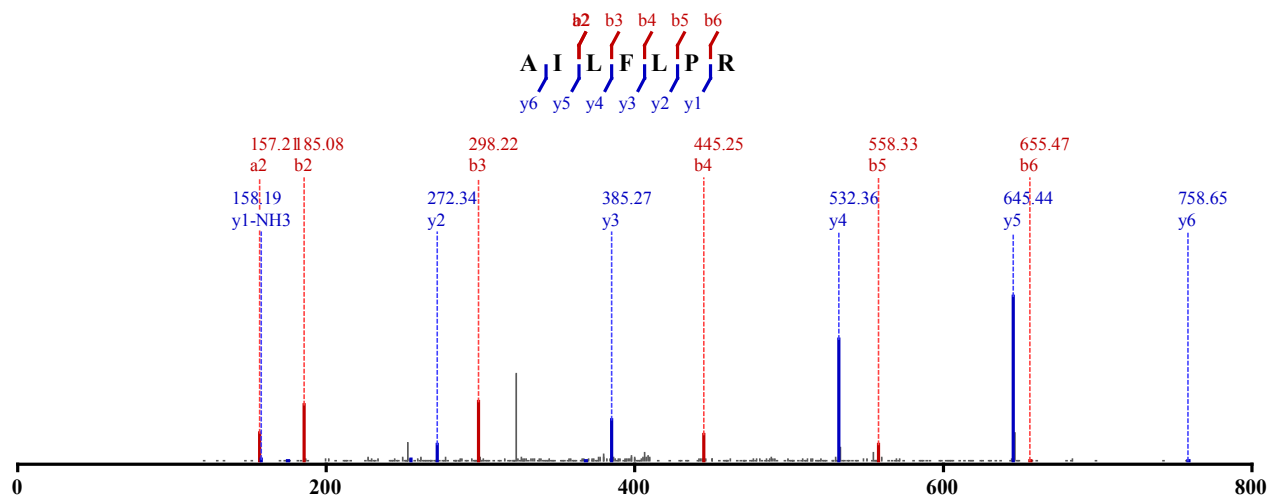

Not Modified

Identified in MSS79 with qvalue 0.00

Charge: 2, Exp. m/z: 415.269, Calc. m/z: 415.268

Data File: HeLa\_AspN-Try\_CID\_3, Scans: 38424 - 38424

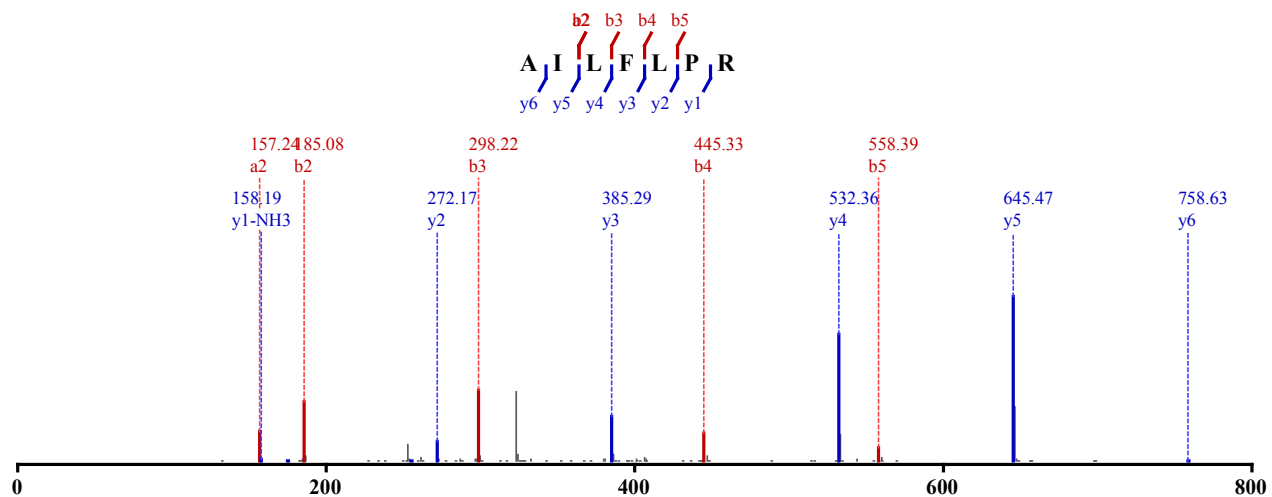

Not Modified

Identified in MSS79 with qvalue 0.01  
 Charge: 2, Exp. m/z: 415.269, Calc. m/z: 415.268  
 Data File: HeLa\_AspN-Try\_CID\_3, Scans: 38538 - 38538

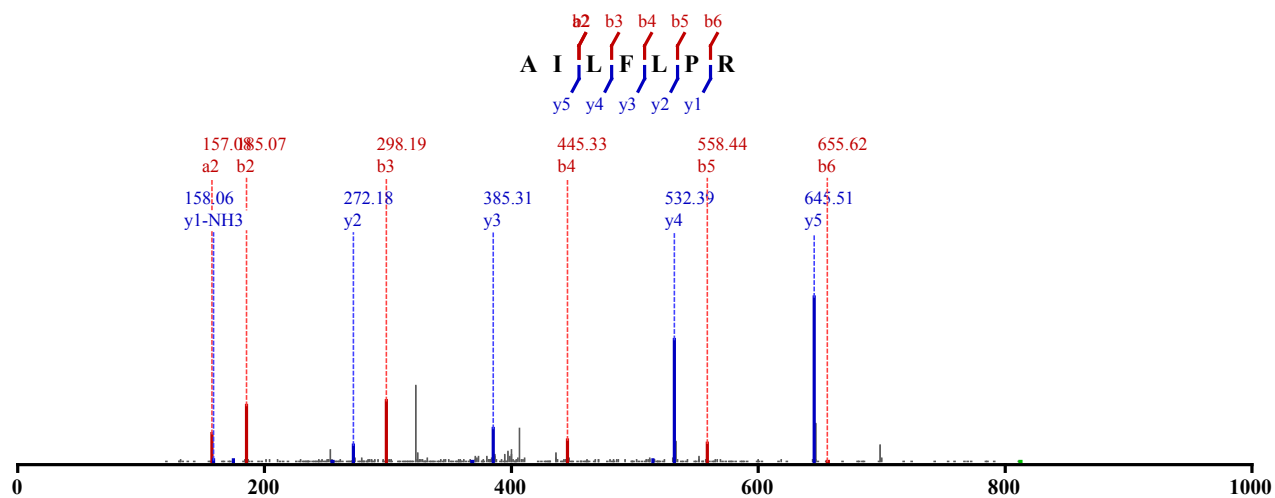

Not Modified  
 Identified in MSS81 with qvalue 0.01  
 Charge: 2, Exp. m/z: 415.269, Calc. m/z: 415.268  
 Data File: HeLa\_CET\_CID\_1, Scans: 37272 - 37272

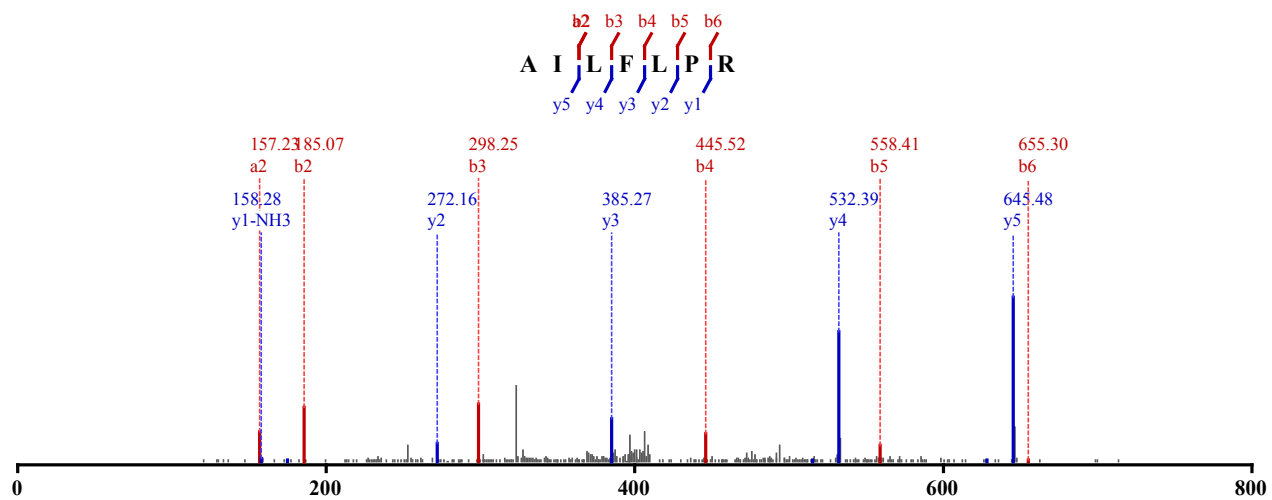

Not Modified  
 Identified in MSS81 with qvalue 0.01  
 Charge: 2, Exp. m/z: 415.269, Calc. m/z: 415.268  
 Data File: HeLa\_CET\_CID\_1, Scans: 37039 - 37039

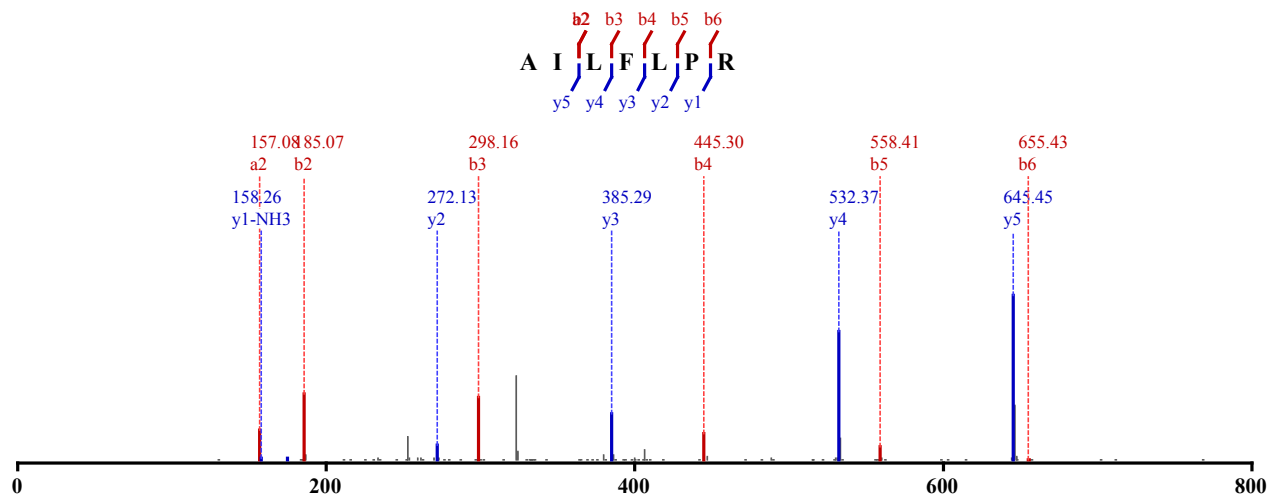

Not Modified

Identified in MSS85 with qvalue 0.01

Charge: 2, Exp. m/z: 415.268, Calc. m/z: 415.268

Data File: HeLa\_Chytry-Try\_CID\_1, Scans: 35944 - 35944

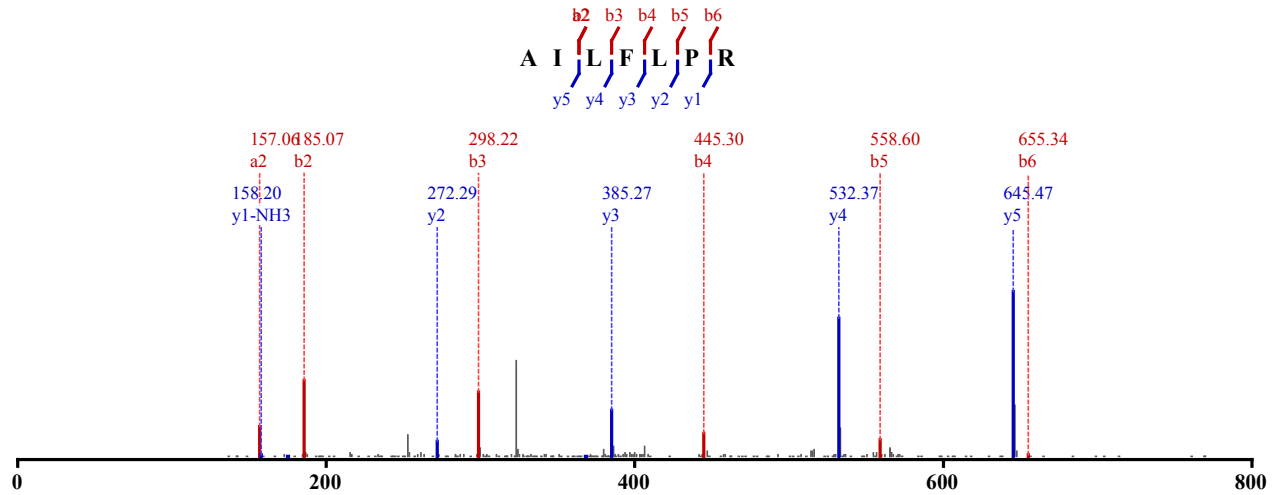

Not Modified

Identified in MSS85 with qvalue 0.01

Charge: 2, Exp. m/z: 415.269, Calc. m/z: 415.268

Data File: HeLa\_Chytry-Try\_CID\_2, Scans: 36821 - 36821

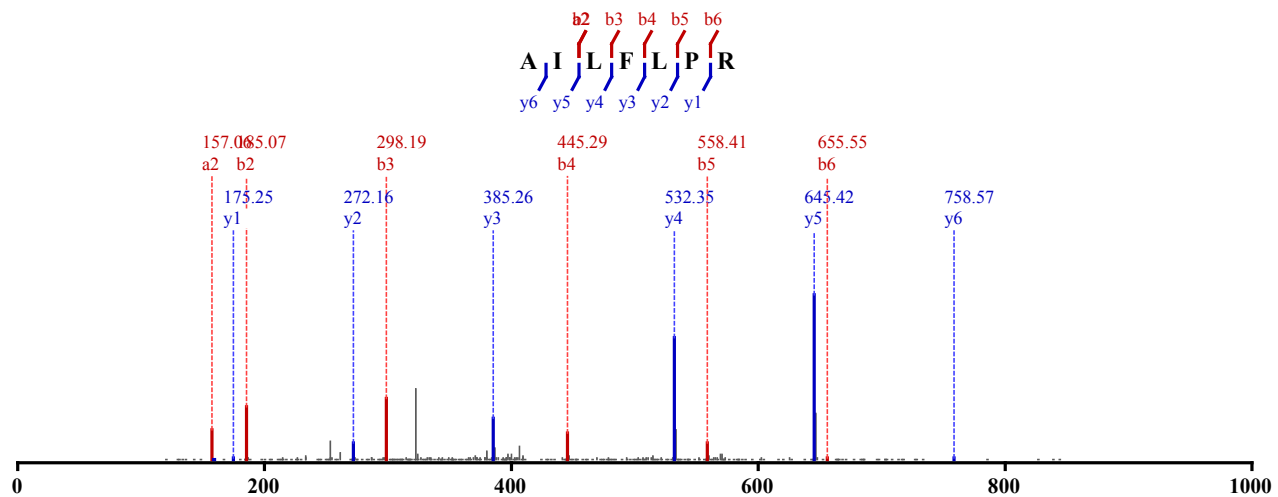

Not Modified

Identified in MSS85 with qvalue 0.01

Charge: 2, Exp. m/z: 415.268, Calc. m/z: 415.268

Data File: HeLa\_Chytry-Try\_CID\_3, Scans: 36950 - 36950

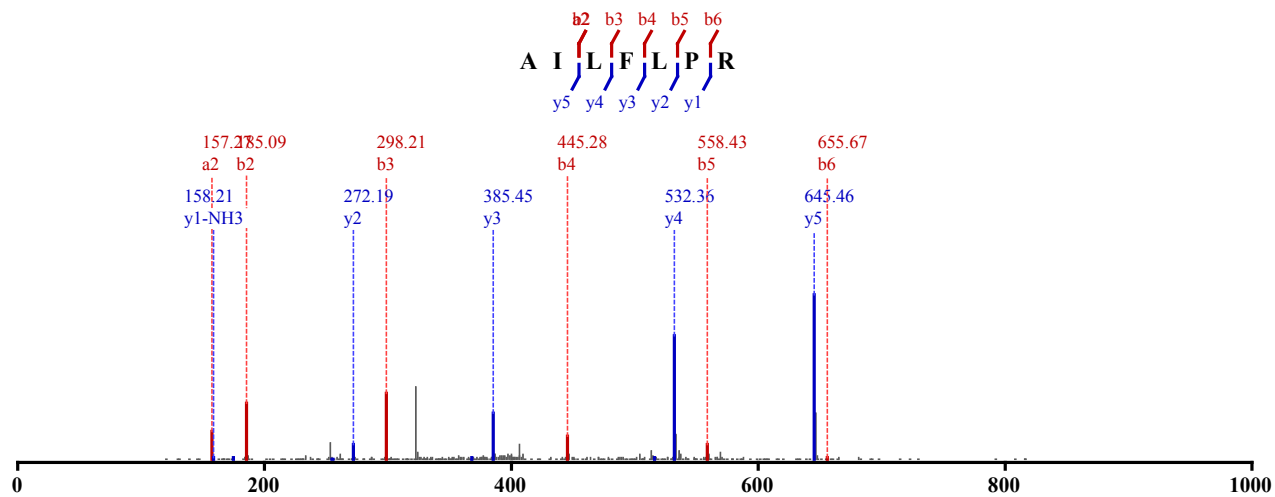

Not Modified

Identified in MSS85 with qvalue 0.00

Charge: 2, Exp. m/z: 415.268, Calc. m/z: 415.268

Data File: HeLa\_Chetry-Try\_CID\_3, Scans: 37061 - 37061

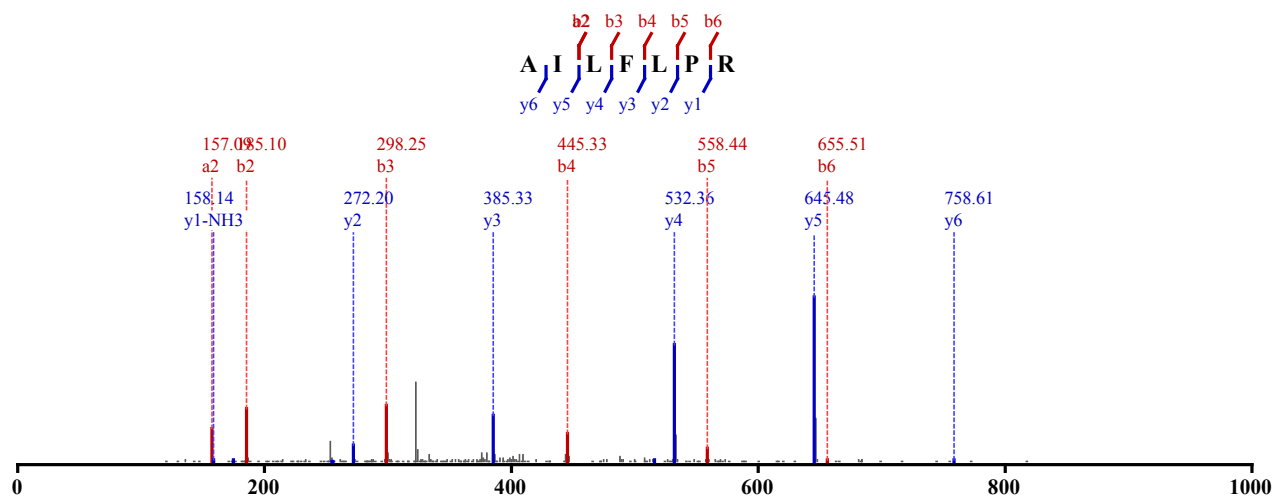

Not Modified

Identified in MSS88 with qvalue 0.01

Charge: 2, Exp. m/z: 415.269, Calc. m/z: 415.268

Data File: HeLa\_elastase-try\_CID\_1, Scans: 35684 - 35684

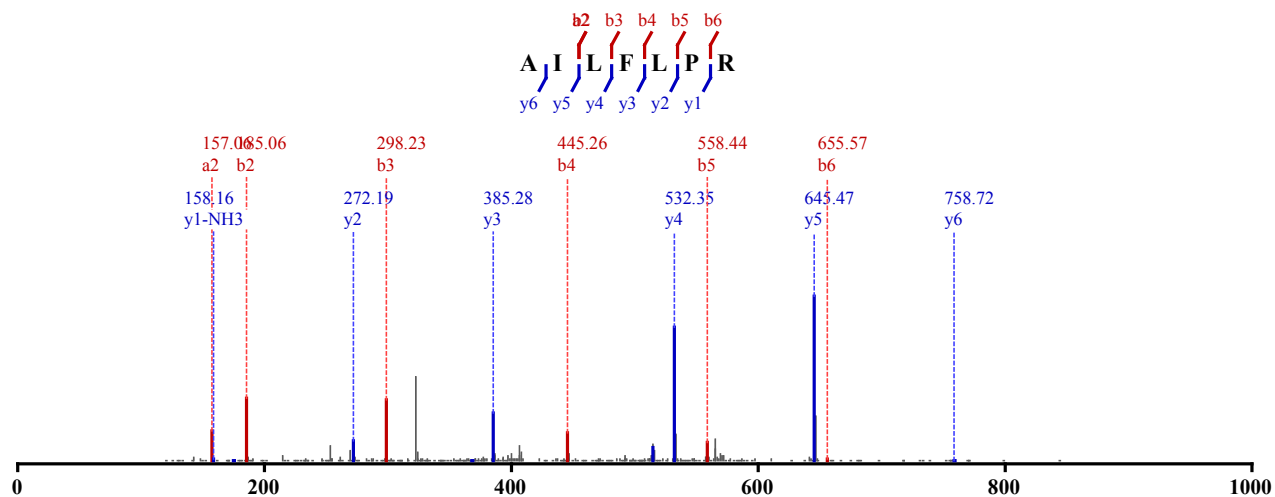

Not Modified

Identified in MSS88 with qvalue 0.01

Charge: 2, Exp. m/z: 415.269, Calc. m/z: 415.268



Data File: HeLa\_elastase-try\_CID\_2, Scans: 36598 - 36598

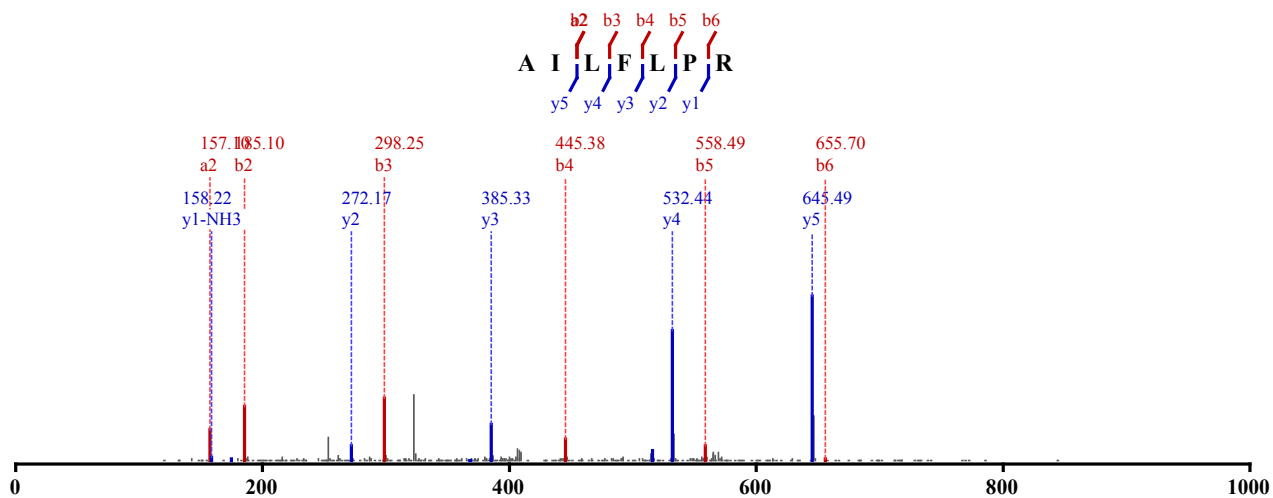

Not Modified

Identified in MSS88 with qvalue 0.00

Charge: 2, Exp. m/z: 415.269, Calc. m/z: 415.268

Data File: HeLa\_elastase-try\_CID\_2, Scans: 36707 - 36707

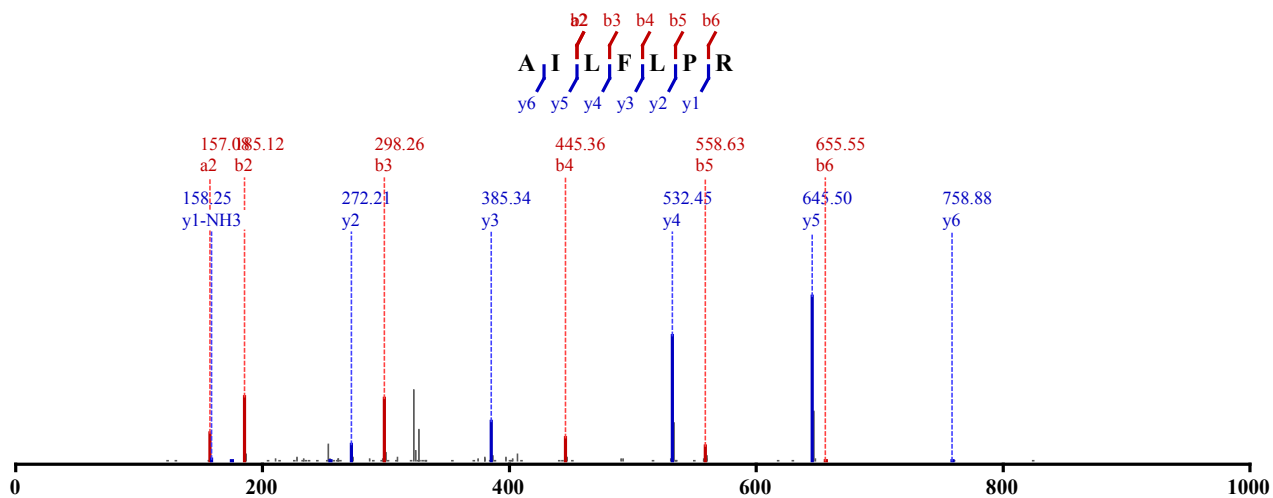

Not Modified

Identified in MSS88 with qvalue 0.00

Charge: 2, Exp. m/z: 415.269, Calc. m/z: 415.268

Data File: HeLa\_elastase-try\_CID\_3, Scans: 38174 - 38174

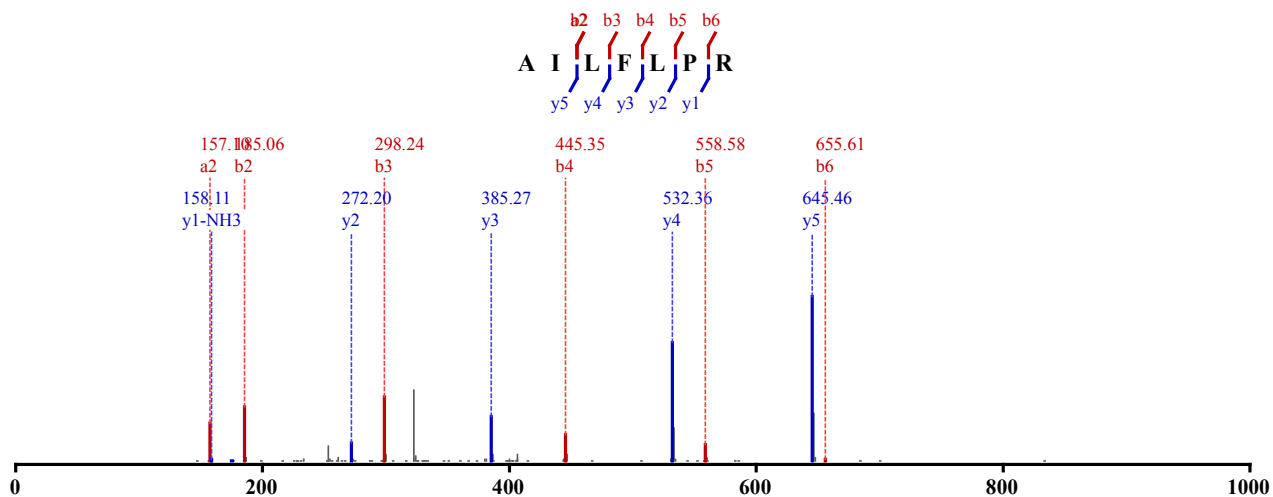

Not Modified

Identified in MSS88 with qvalue 0.01  
 Charge: 2, Exp. m/z: 415.269, Calc. m/z: 415.268  
 Data File: HeLa\_elastase-try\_CID\_3, Scans: 38408 - 38408

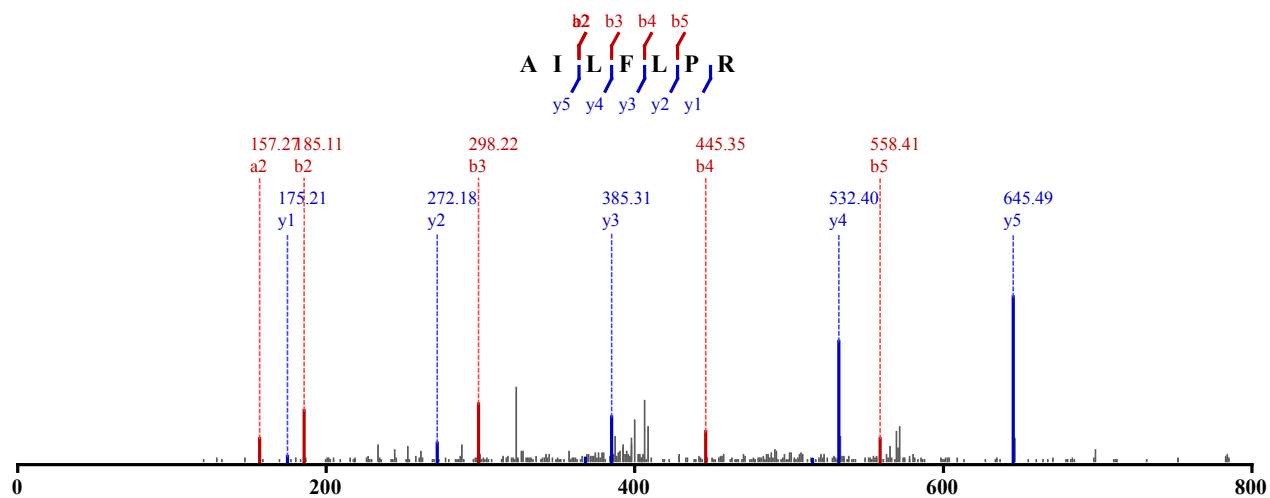

Not Modified  
 Identified in MSS88 with qvalue 0.01  
 Charge: 2, Exp. m/z: 415.269, Calc. m/z: 415.268  
 Data File: HeLa\_elastase-try\_CID\_3, Scans: 38064 - 38064

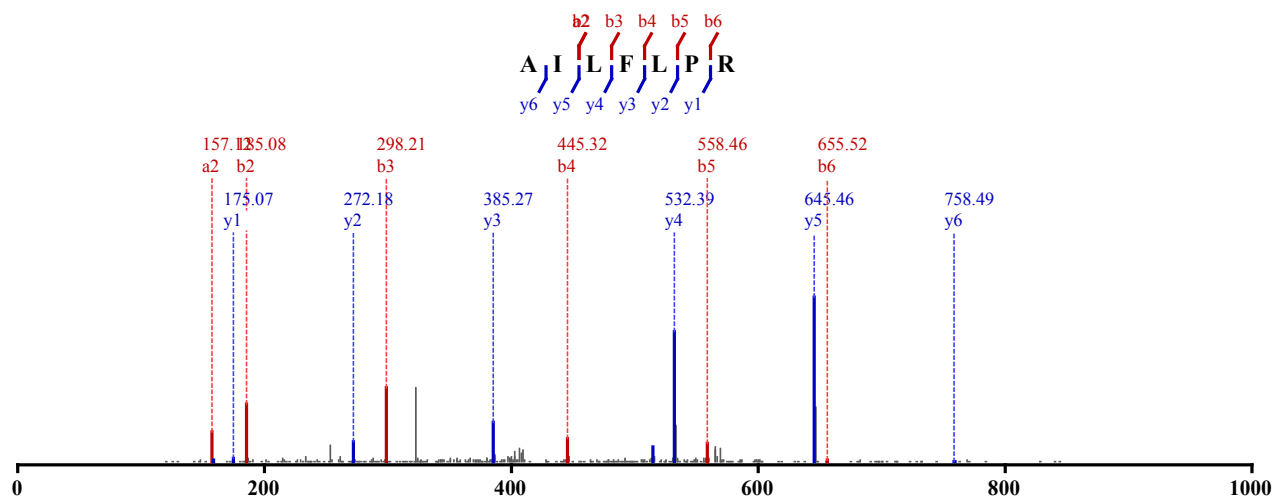

Not Modified  
 Identified in MSS91 with qvalue 0.01  
 Charge: 2, Exp. m/z: 415.268, Calc. m/z: 415.268  
 Data File: HeLa\_GET\_CID\_1, Scans: 34776 - 34776

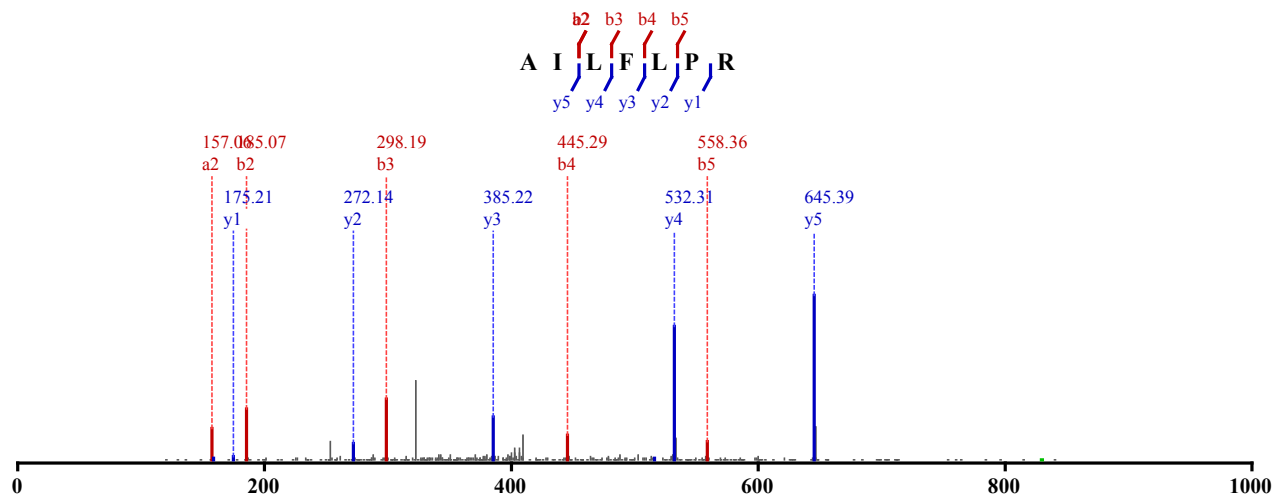

Not Modified

Identified in MSS90 with qvalue 0.01

Charge: 2, Exp. m/z: 415.269, Calc. m/z: 415.268

Data File: HeLa\_GCT\_CID\_1, Scans: 35765 - 35765

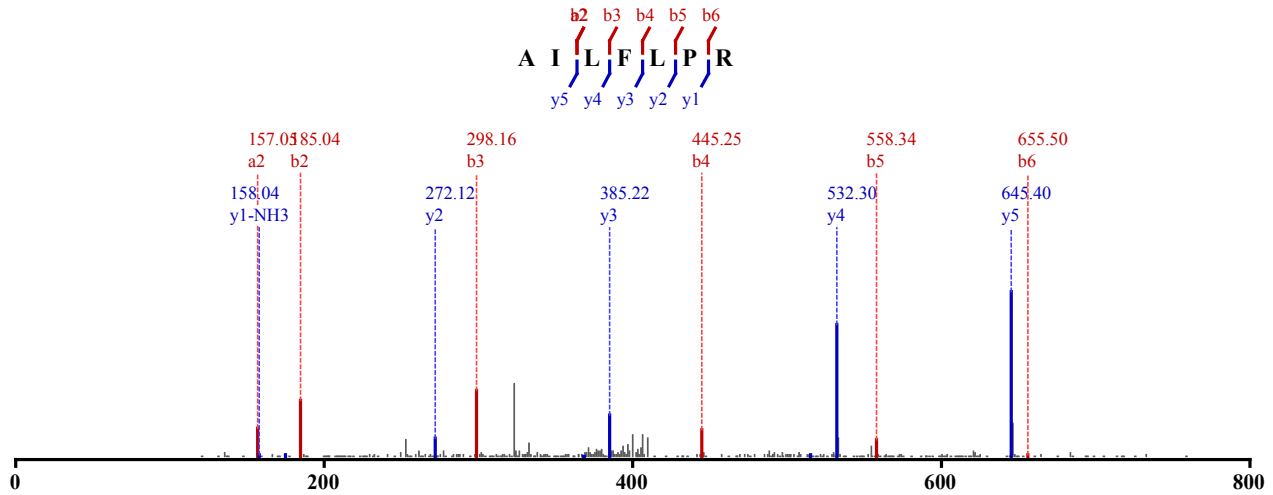

Not Modified

Identified in MSS90 with qvalue 0.01

Charge: 2, Exp. m/z: 415.269, Calc. m/z: 415.268

Data File: HeLa\_GCT\_CID\_1, Scans: 35867 - 35867

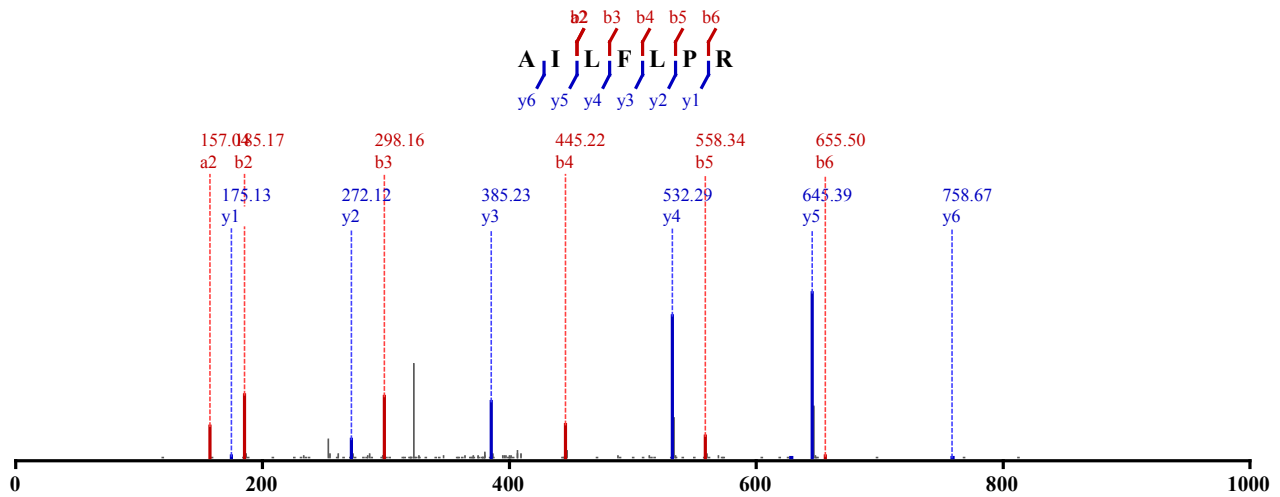

Not Modified

Identified in MSS94 with qvalue 0.01

Charge: 2, Exp. m/z: 415.269, Calc. m/z: 415.268

Data File: HeLa\_GLT\_CID\_1, Scans: 34809 - 34809

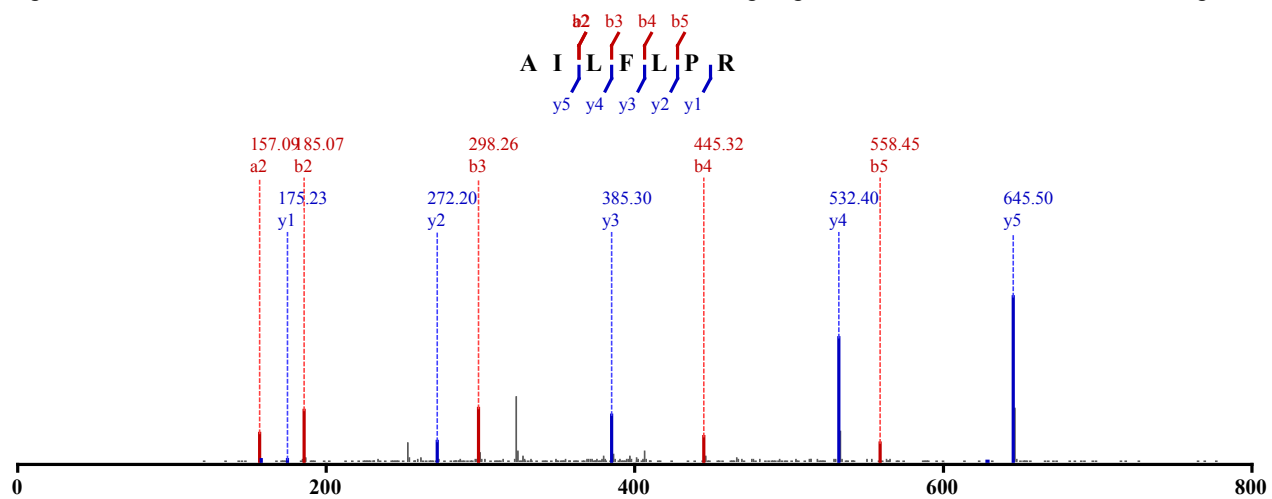

Not Modified

Identified in MSS100 with qvalue 0.01

Charge: 2, Exp. m/z: 415.269, Calc. m/z: 415.268

Data File: HeLa\_GluC-Try\_CID\_1, Scans: 35512 - 35512

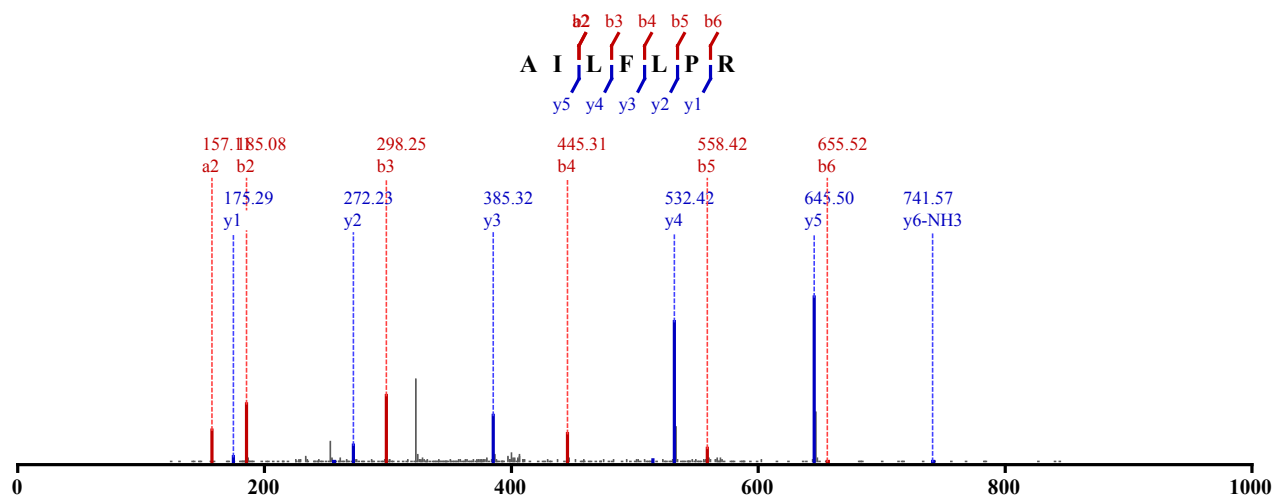

Not Modified

Identified in MSS100 with qvalue 0.00

Charge: 2, Exp. m/z: 415.269, Calc. m/z: 415.268

Data File: HeLa\_GluC-Try\_CID\_2, Scans: 36956 - 36956

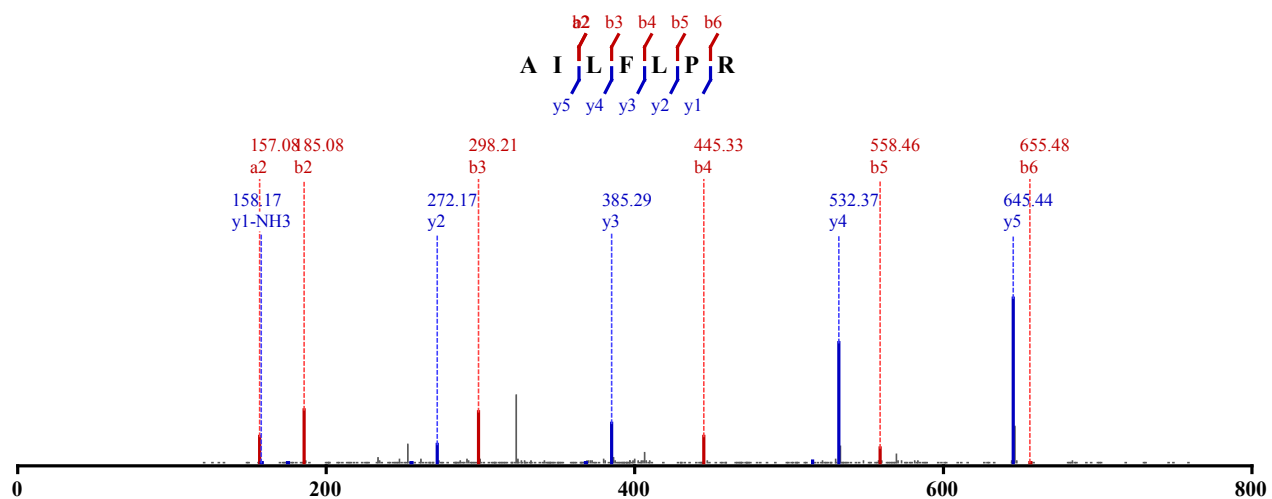

Not Modified

Identified in MSS100 with qvalue 0.00

Charge: 2, Exp. m/z: 415.269, Calc. m/z: 415.268

Data File: HeLa\_GluC-Try\_CID\_2, Scans: 37062 - 37062

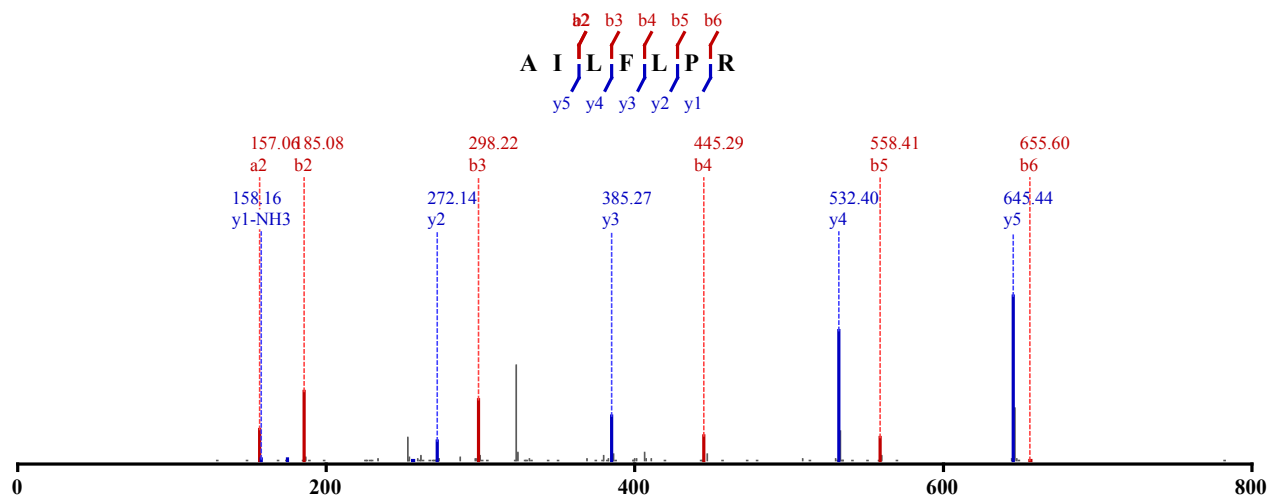

Not Modified

Identified in MSS100 with qvalue 0.01

Charge: 2, Exp. m/z: 415.269, Calc. m/z: 415.268

Data File: HeLa\_GluC-Try\_CID\_3, Scans: 37430 - 37430

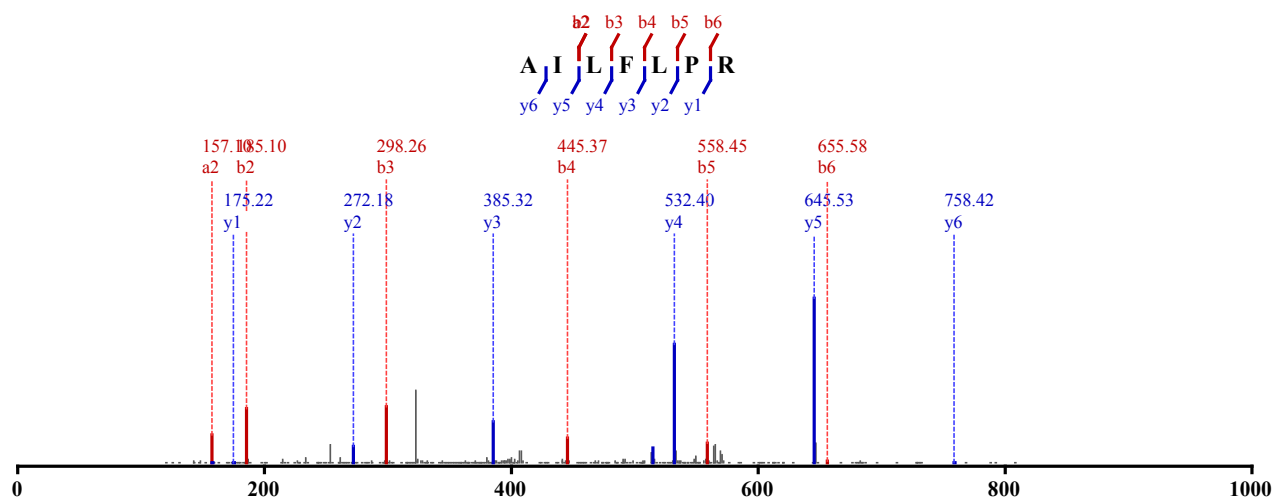

Not Modified

Identified in MSS100 with qvalue 0.00

Charge: 2, Exp. m/z: 415.269, Calc. m/z: 415.268

Data File: HeLa\_GluC-Try\_CID\_3, Scans: 37533 - 37533

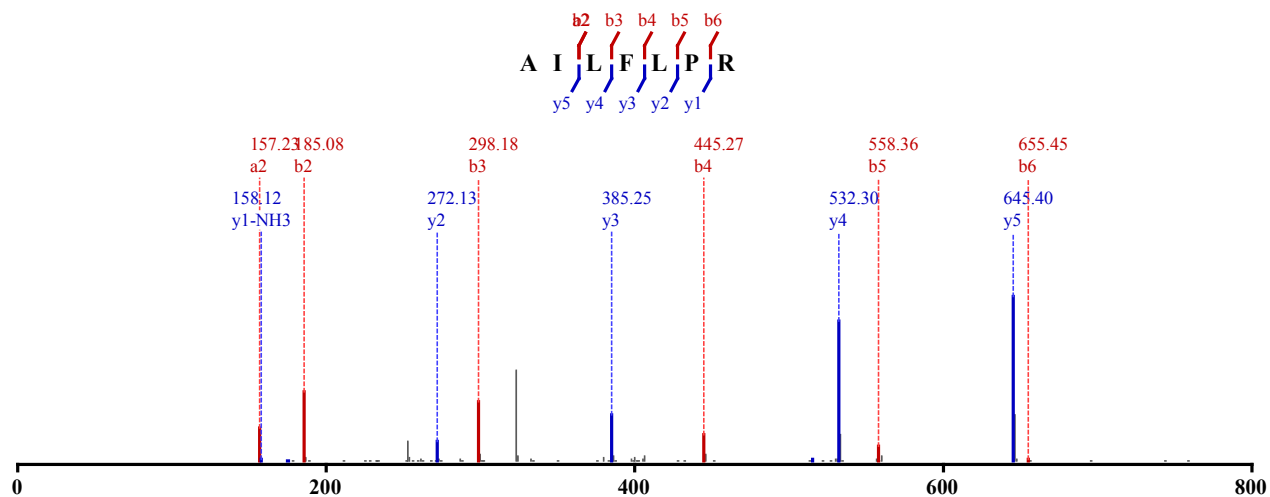

Not Modified

Identified in MSS102 with qvalue 0.00  
 Charge: 2, Exp. m/z: 415.269, Calc. m/z: 415.268  
 Data File: HeLa\_LCT\_CID\_1, Scans: 32796 - 32796

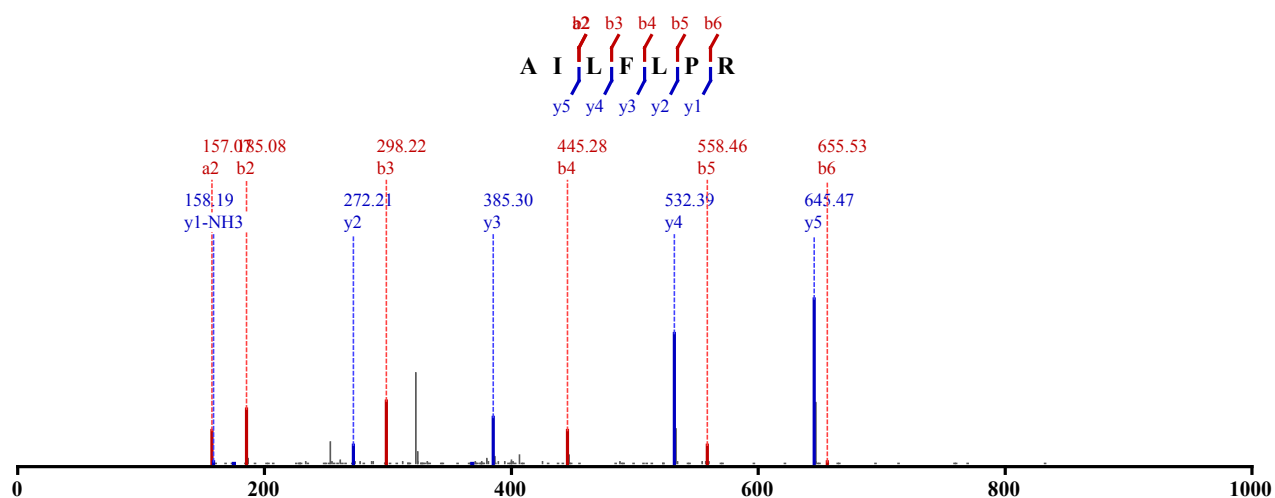

Not Modified  
 Identified in MSS138 with qvalue 0.00  
 Charge: 2, Exp. m/z: 415.269, Calc. m/z: 415.268  
 Data File: HeLa\_elastase-try\_HCD\_2, Scans: 38515 - 38515

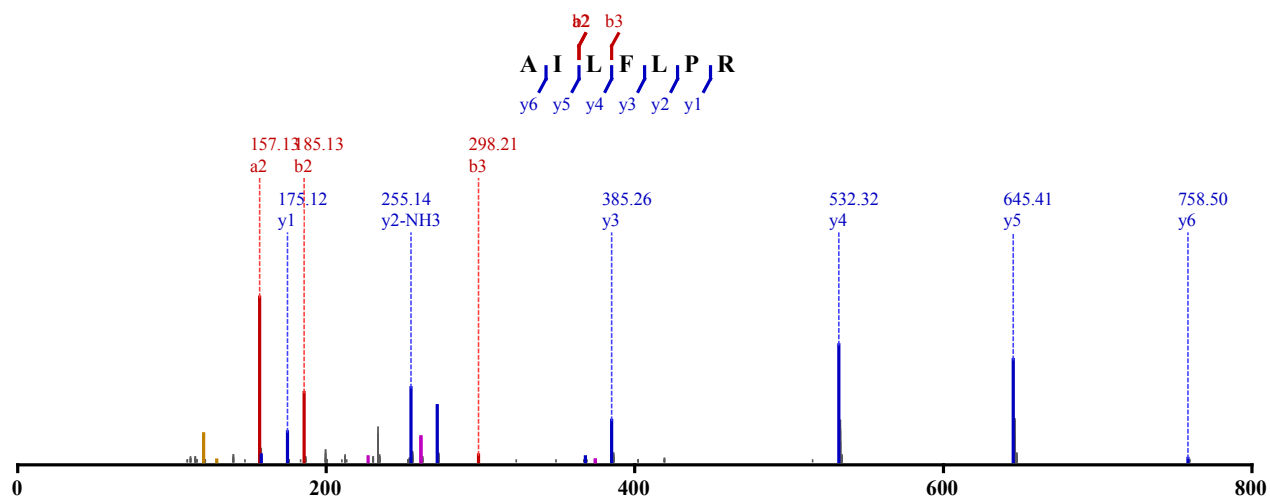

Not Modified  
 Identified in MSS138 with qvalue 0.00  
 Charge: 2, Exp. m/z: 415.268, Calc. m/z: 415.268  
 Data File: HeLa\_elastase-try\_HCD\_3, Scans: 37396 - 37396

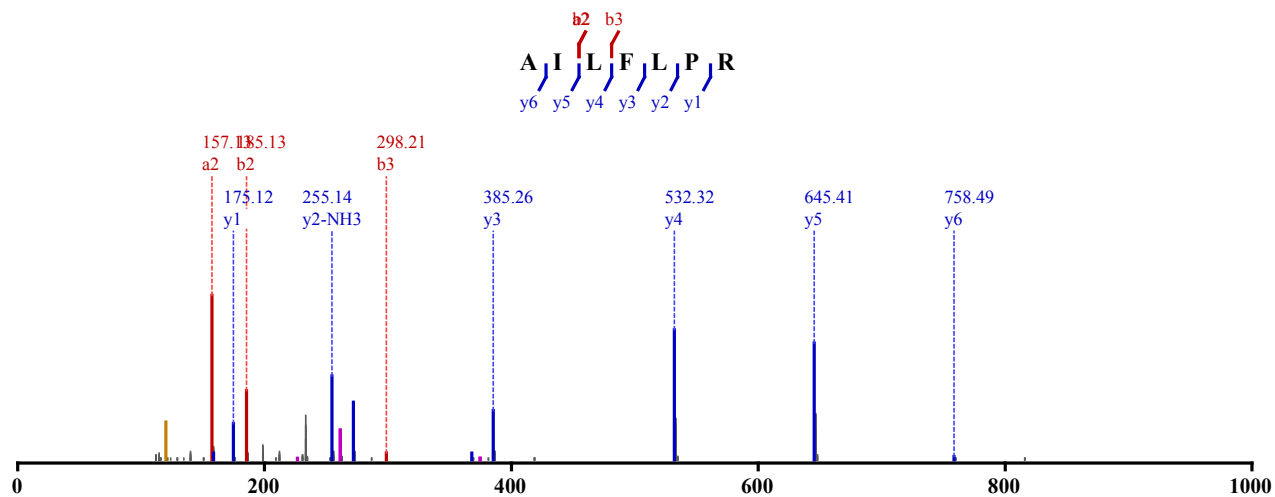

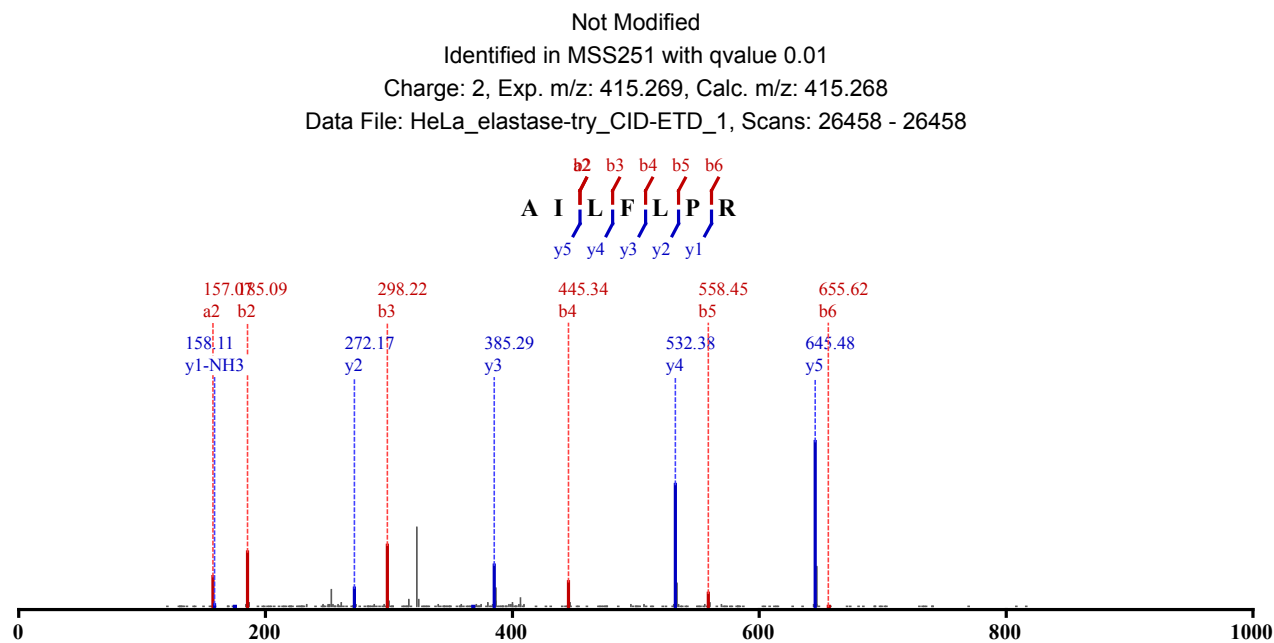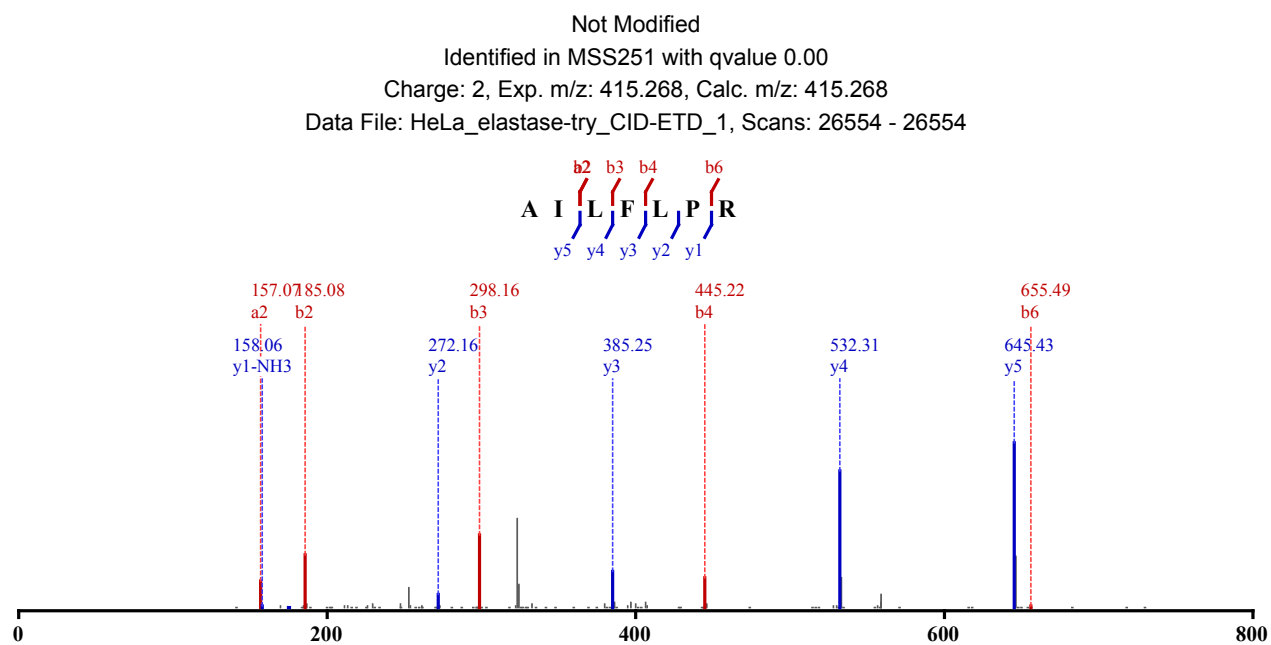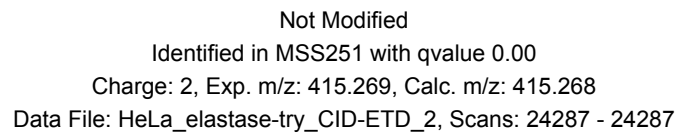

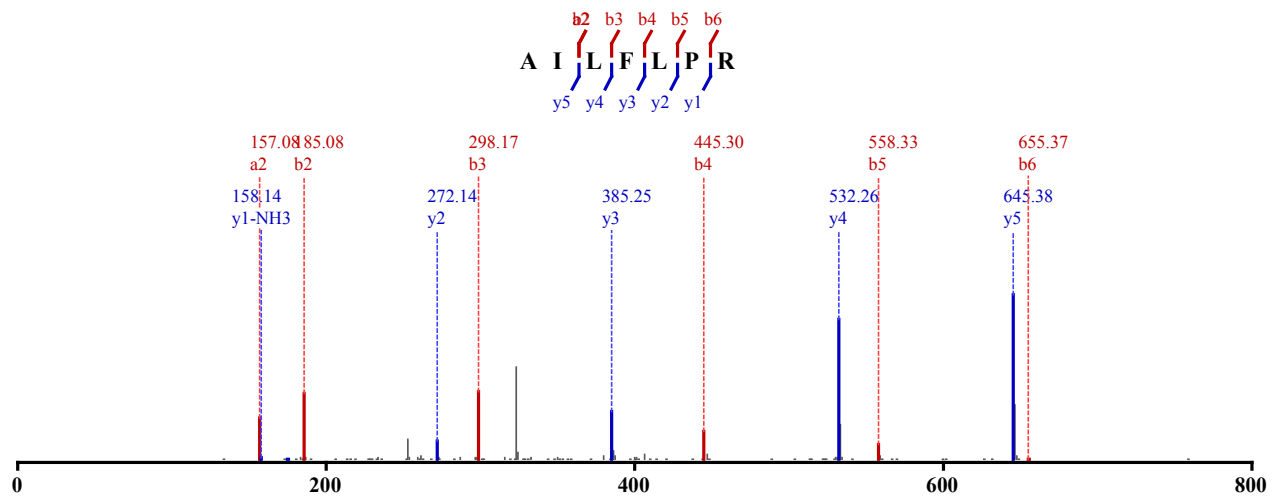

Not Modified

Identified in MSS251 with qvalue 0.00

Charge: 2, Exp. m/z: 415.269, Calc. m/z: 415.268

Data File: HeLa\_elastase-try\_CID-ETD\_3, Scans: 25964 - 25964

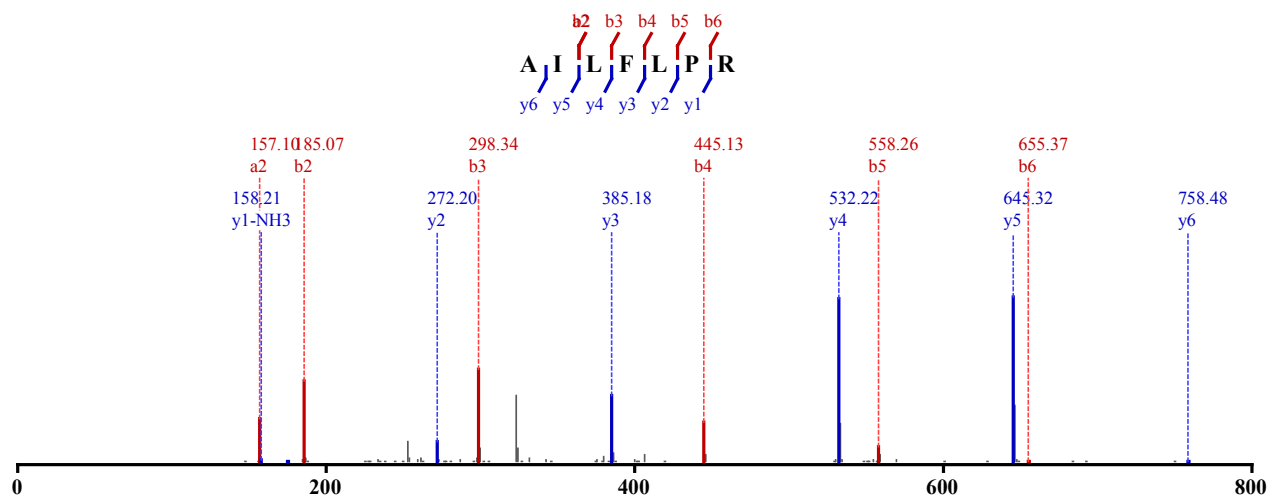

Not Modified

Identified in MSS251 with qvalue 0.01

Charge: 2, Exp. m/z: 415.268, Calc. m/z: 415.268

Data File: HeLa\_elastase-try\_CID-ETD\_3, Scans: 26063 - 26063

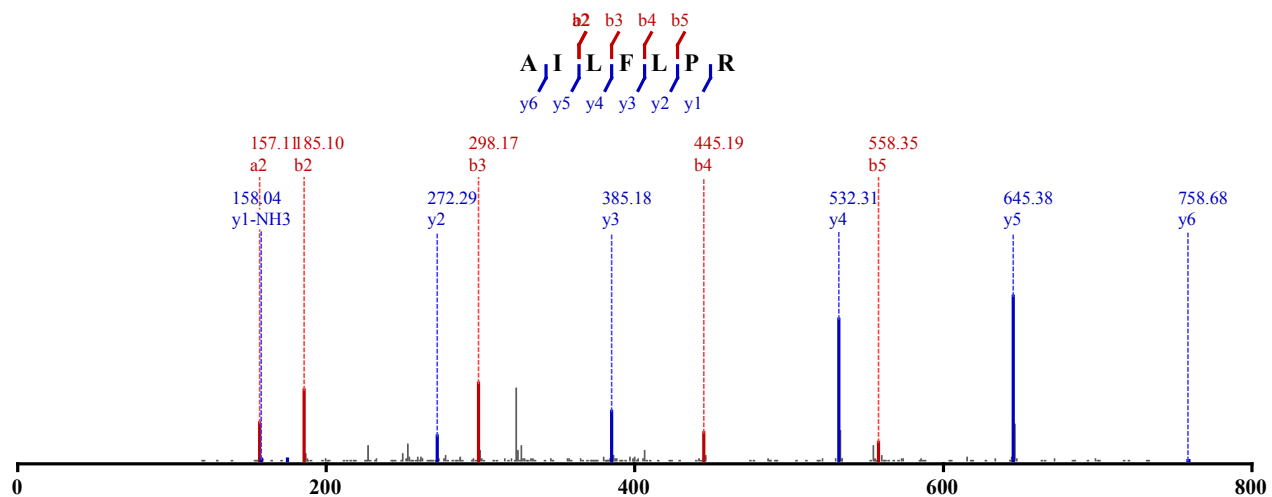

Not Modified

Identified in MSS255 with qvalue 0.01

Charge: 2, Exp. m/z: 415.269, Calc. m/z: 415.268



Data File: HeLa\_ArgC\_CID\_1, Scans: 27251 - 27251

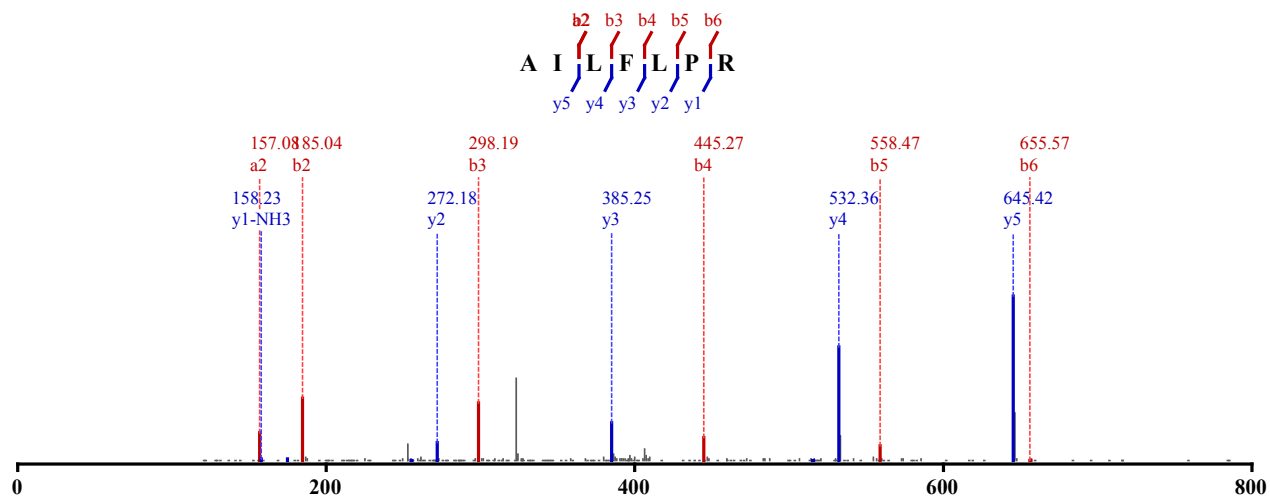

Not Modified

Identified in MSS257 with qvalue 0.00

Charge: 2, Exp. m/z: 415.268, Calc. m/z: 415.268

Data File: HeLa\_ArgC\_HCD\_2, Scans: 35515 - 35515

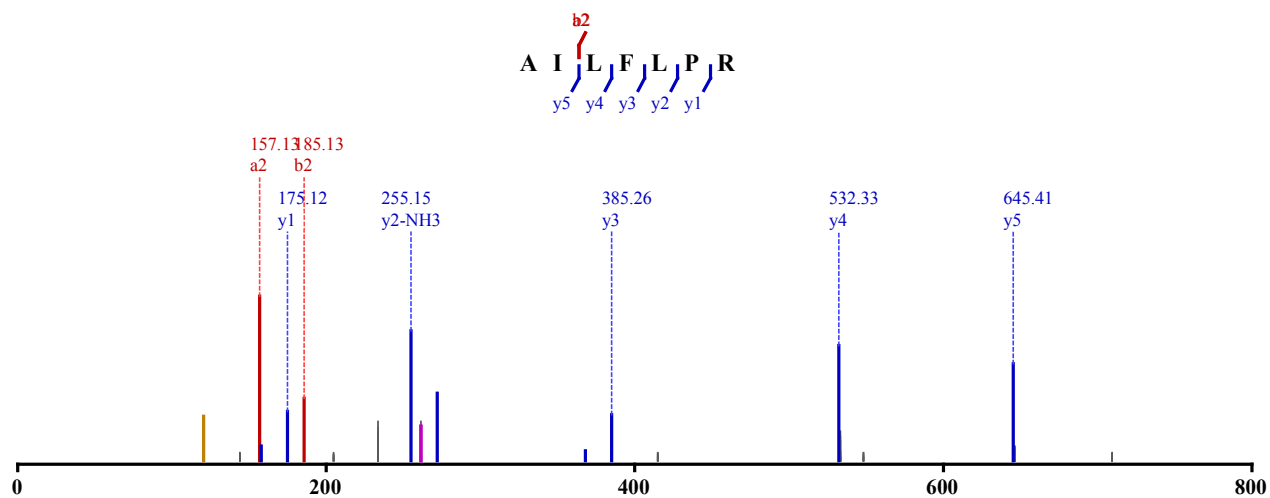

Not Modified

Identified in MSS255 with qvalue 0.01

Charge: 2, Exp. m/z: 415.269, Calc. m/z: 415.268

Data File: HeLa\_ArgC\_CID\_2, Scans: 27345 - 27345

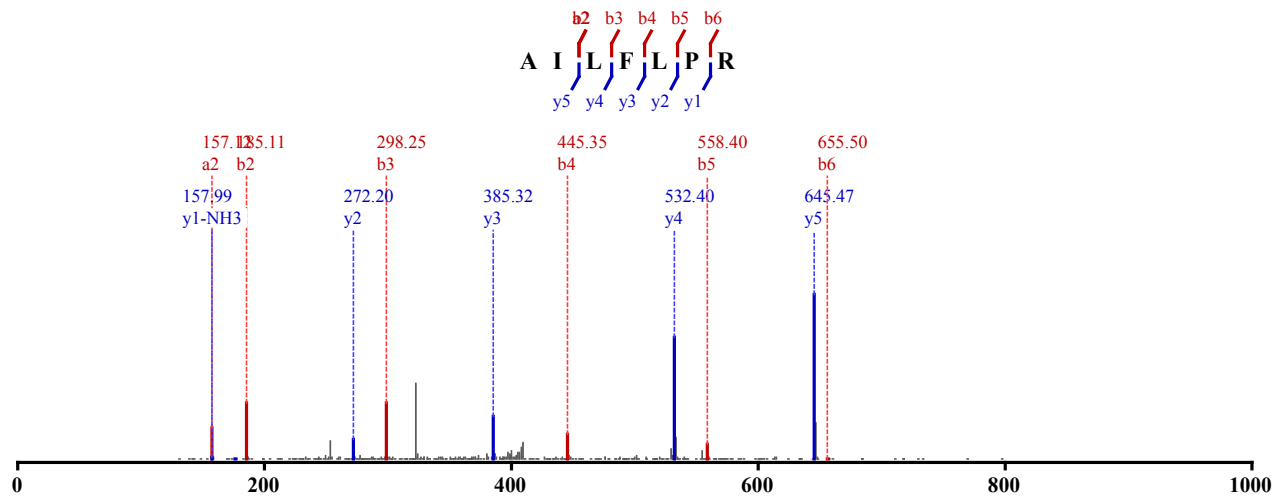

Not Modified

Identified in MSS257 with qvalue 0.00  
 Charge: 2, Exp. m/z: 415.268, Calc. m/z: 415.268  
 Data File: HeLa\_ArgC\_HCD\_3, Scans: 35302 - 35302

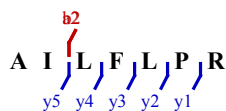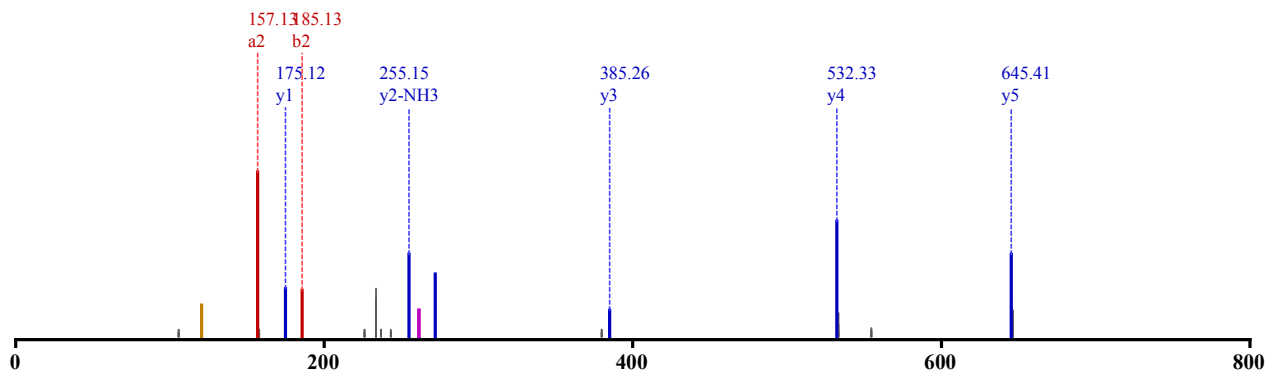

Not Modified  
 Identified in MSS259 with qvalue 0.01  
 Charge: 2, Exp. m/z: 415.269, Calc. m/z: 415.268  
 Data File: HeLa\_ArgC-LysC\_CID\_3, Scans: 27807 - 27807

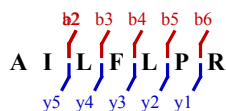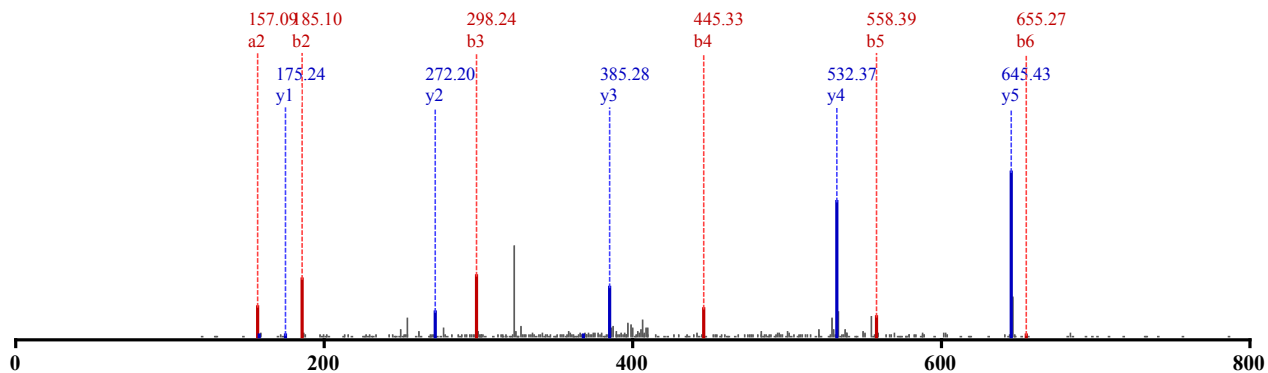

Not Modified  
 Identified in MSS262 with qvalue 0.01  
 Charge: 2, Exp. m/z: 415.269, Calc. m/z: 415.268  
 Data File: HeLa\_ArgC-Try\_CID\_3, Scans: 27774 - 27774

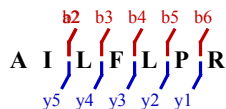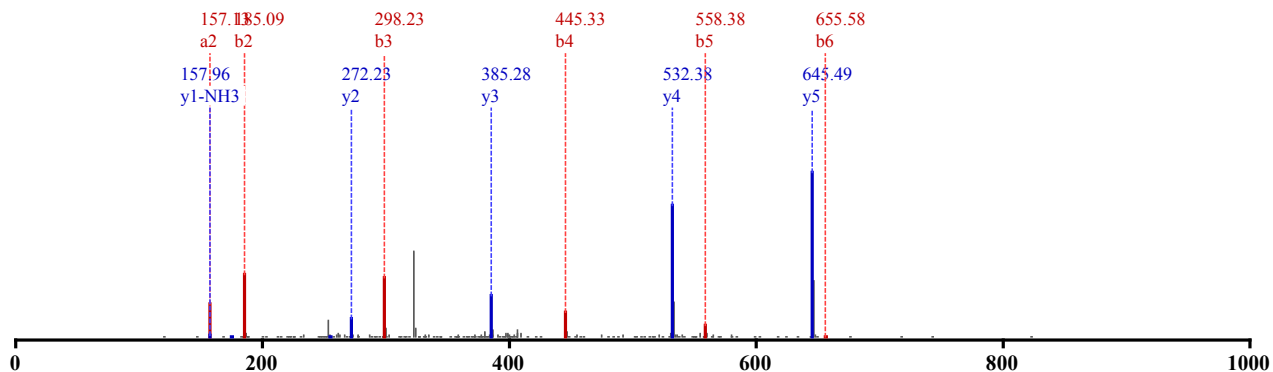

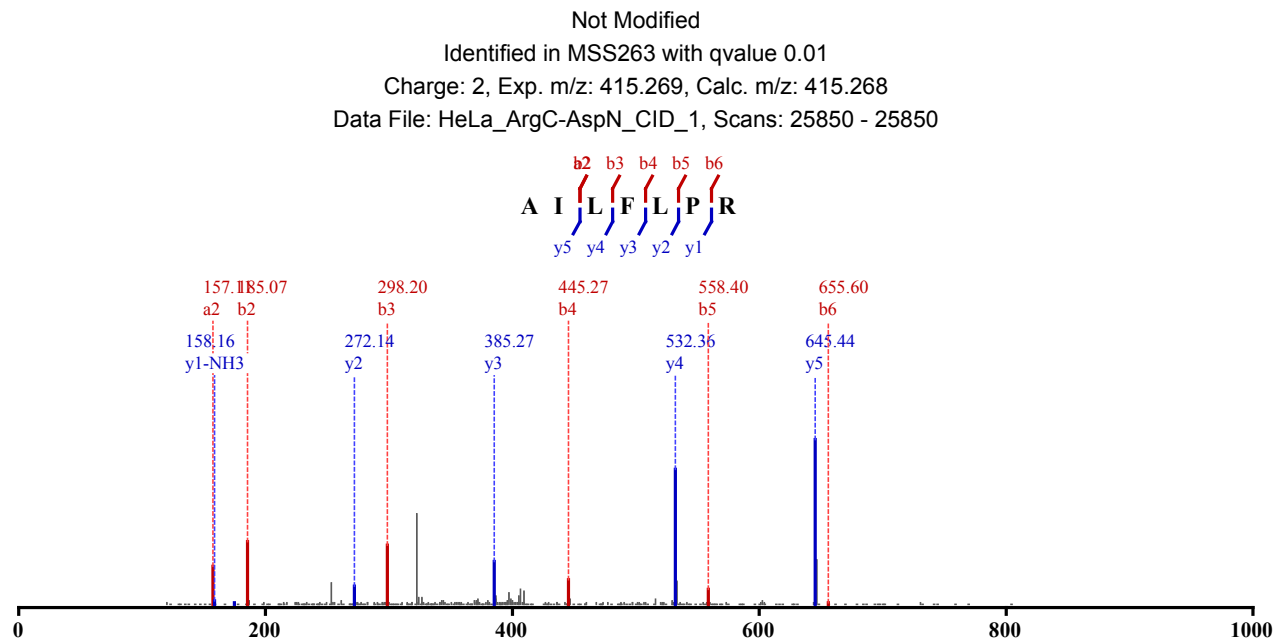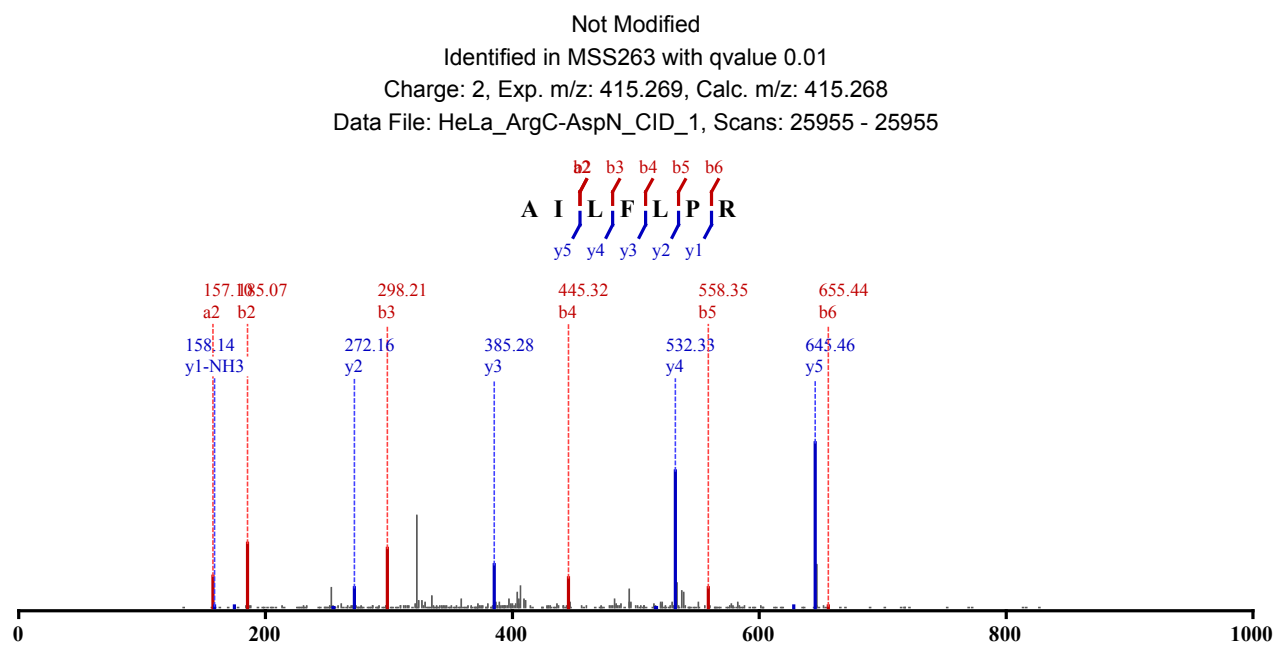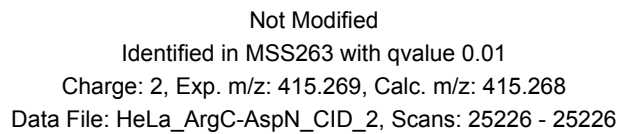

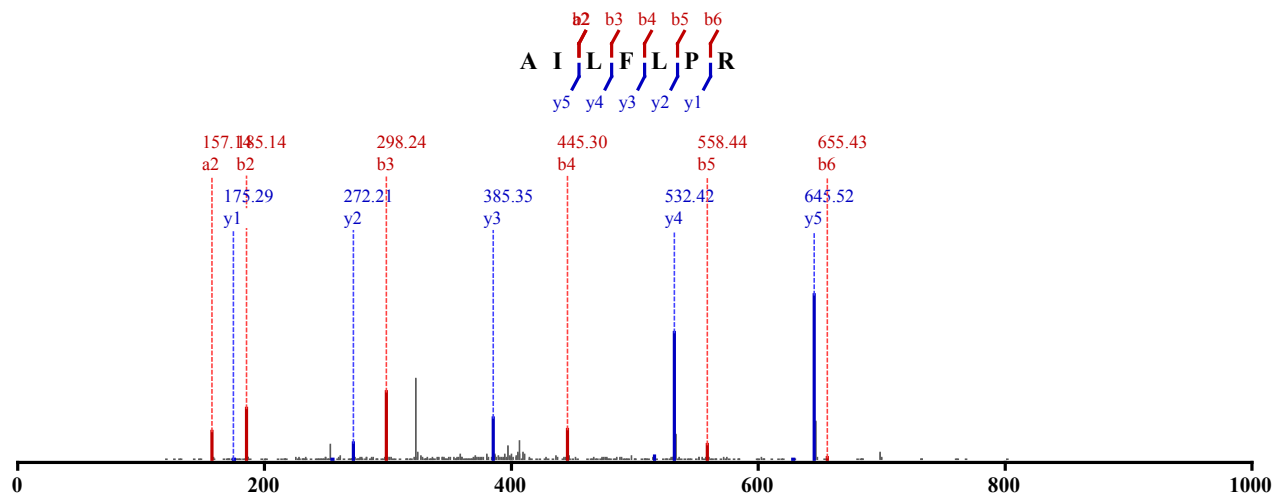

Not Modified  
 Identified in MSS263 with qvalue 0.01  
 Charge: 2, Exp. m/z: 415.268, Calc. m/z: 415.268  
 Data File: HeLa\_ArgC-AspN\_CID\_3, Scans: 25236 - 25236

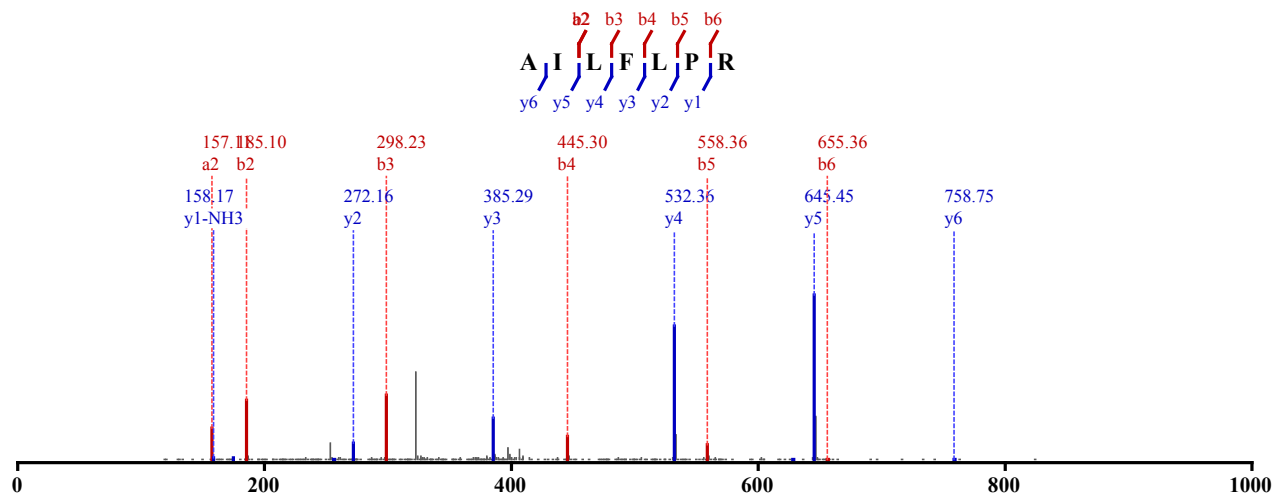

Not Modified  
 Identified in MSS265 with qvalue 0.01  
 Charge: 2, Exp. m/z: 415.269, Calc. m/z: 415.268  
 Data File: HeLa\_ArgC-GluC\_CID\_2, Scans: 27492 - 27492

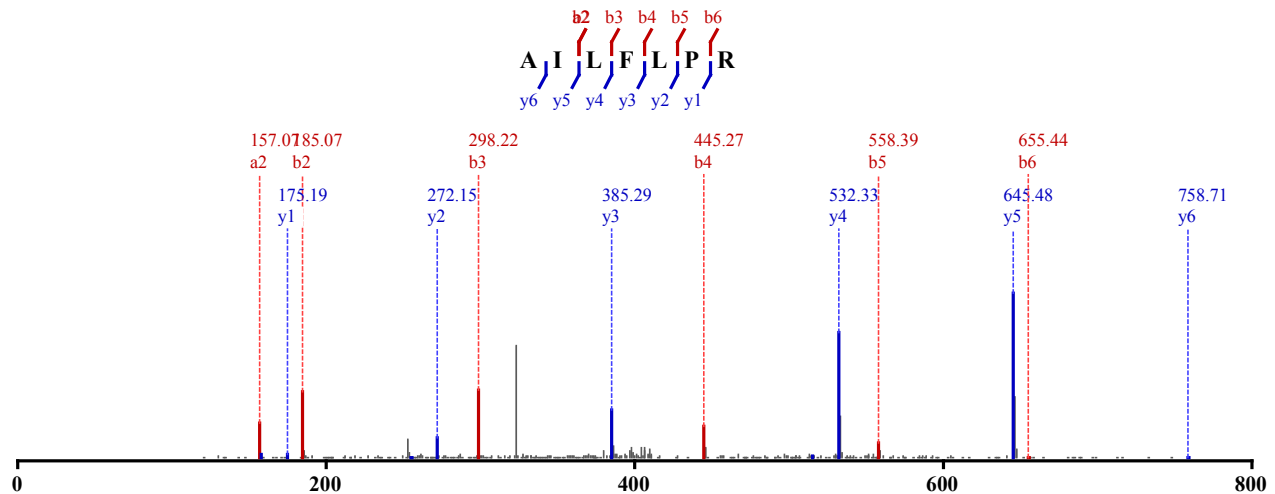

Not Modified  
 Identified in MSS264 with qvalue 0.01  
 Charge: 2, Exp. m/z: 415.269, Calc. m/z: 415.268

Data File: HeLa\_ArgC-Chytry\_CID\_1, Scans: 27342 - 27342

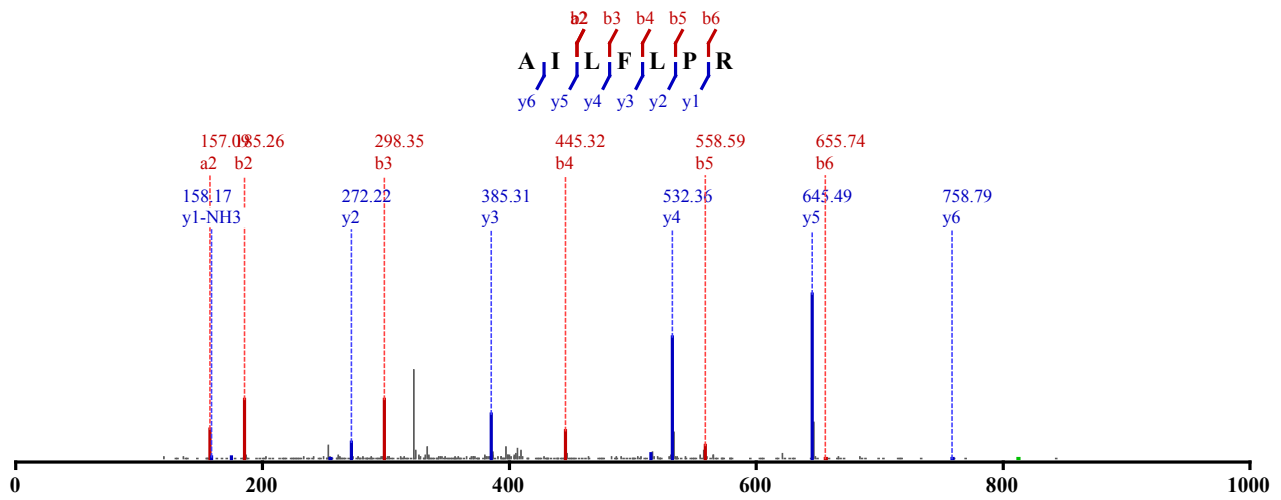

Not Modified

Identified in MSS264 with qvalue 0.00

Charge: 2, Exp. m/z: 415.269, Calc. m/z: 415.268

Data File: HeLa\_ArgC-Chytry\_CID\_1, Scans: 27448 - 27448

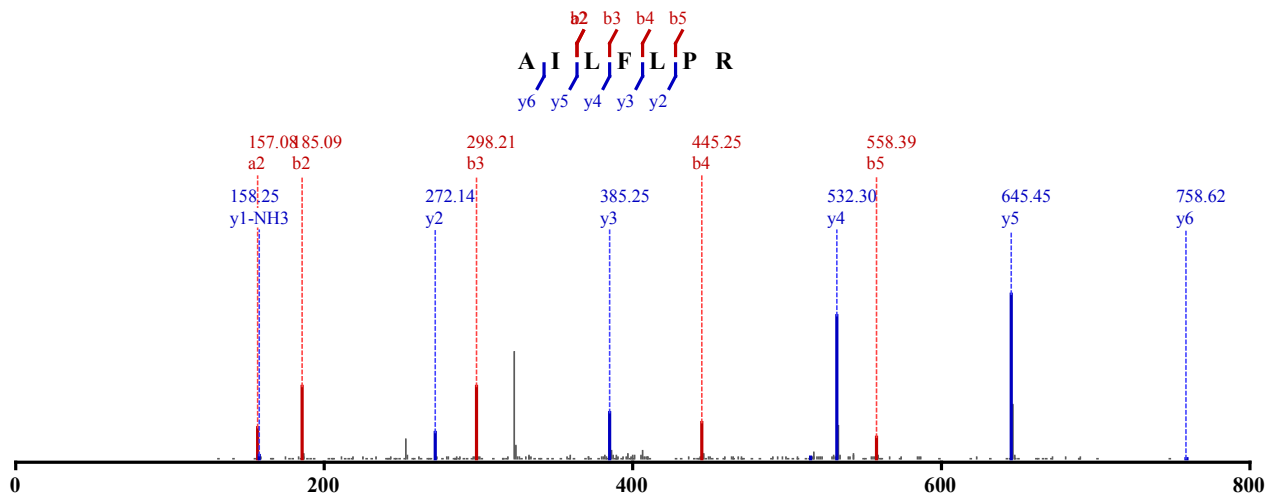

Not Modified

Identified in MSS264 with qvalue 0.00

Charge: 2, Exp. m/z: 415.269, Calc. m/z: 415.268

Data File: HeLa\_ArgC-Chytry\_CID\_2, Scans: 27367 - 27367

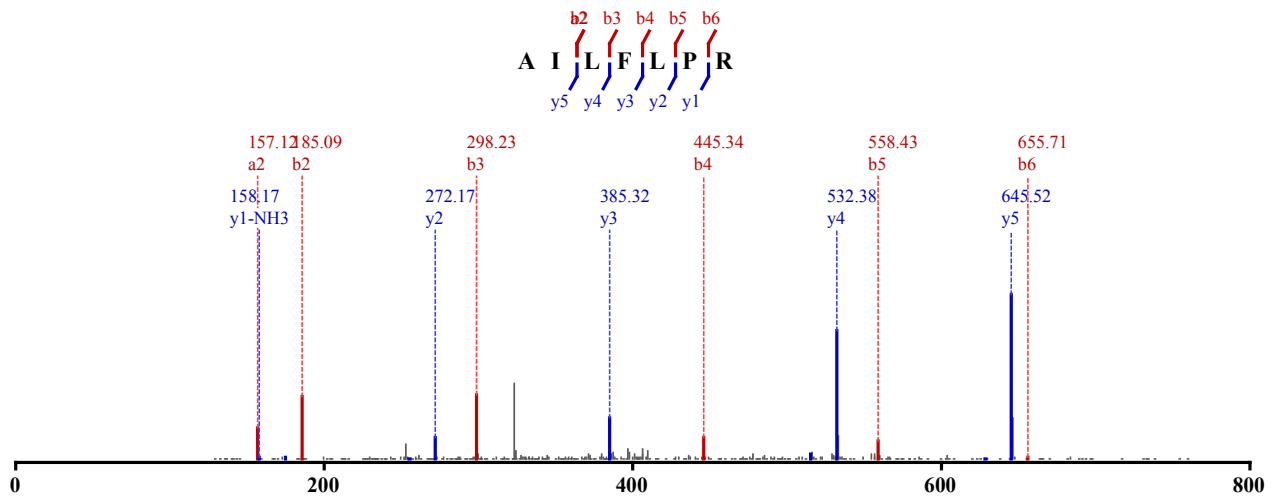

Not Modified

Identified in MSS264 with qvalue 0.00  
 Charge: 2, Exp. m/z: 415.269, Calc. m/z: 415.268  
 Data File: HeLa\_ArgC-Chytry\_CID\_3, Scans: 29883 - 29883

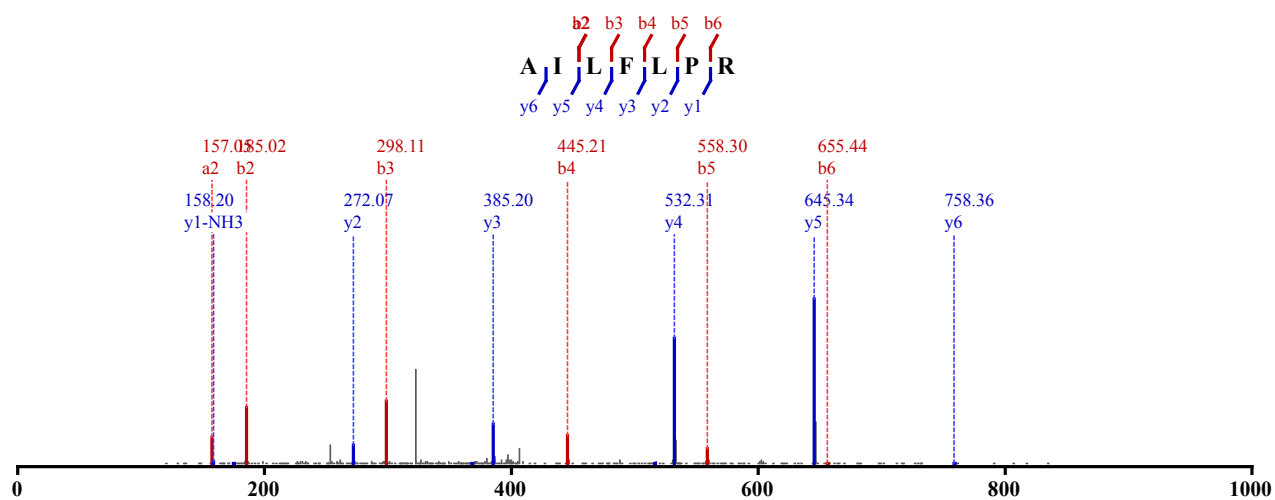

Not Modified  
 Identified in MSS264 with qvalue 0.00  
 Charge: 2, Exp. m/z: 415.269, Calc. m/z: 415.268  
 Data File: HeLa\_ArgC-Chytry\_CID\_3, Scans: 29982 - 29982

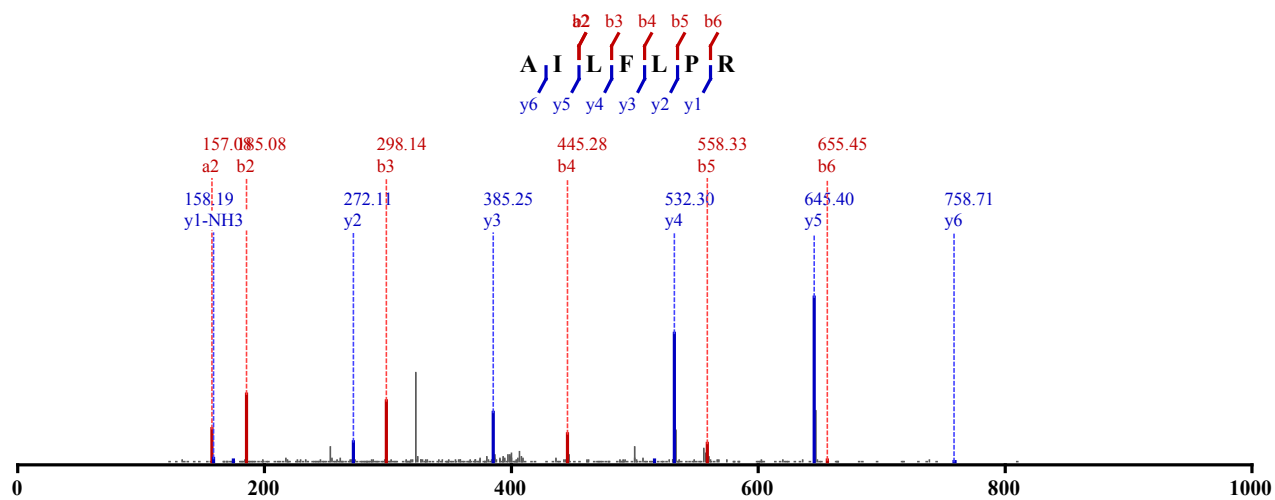

Not Modified  
 Identified in MSS271 with qvalue 0.00  
 Charge: 2, Exp. m/z: 415.268, Calc. m/z: 415.268  
 Data File: HeLa\_ArgC-Chytry\_HCD\_1, Scans: 30475 - 30475

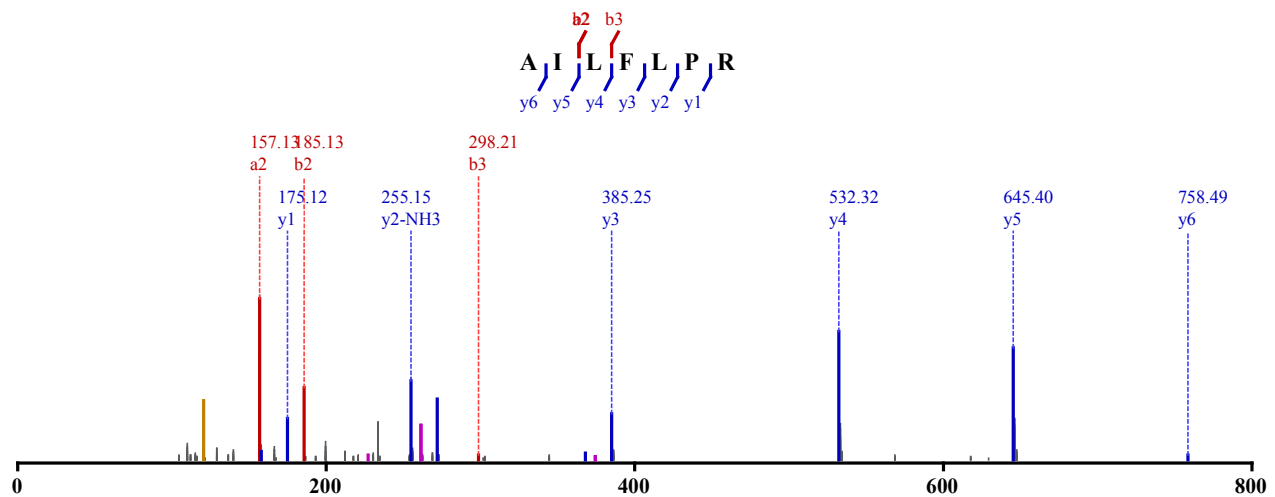

Not Modified  
 Identified in MSS271 with qvalue 0.00  
 Charge: 2, Exp. m/z: 415.269, Calc. m/z: 415.268  
 Data File: HeLa\_ArgC-Chytry\_HCD\_2, Scans: 30578 - 30578

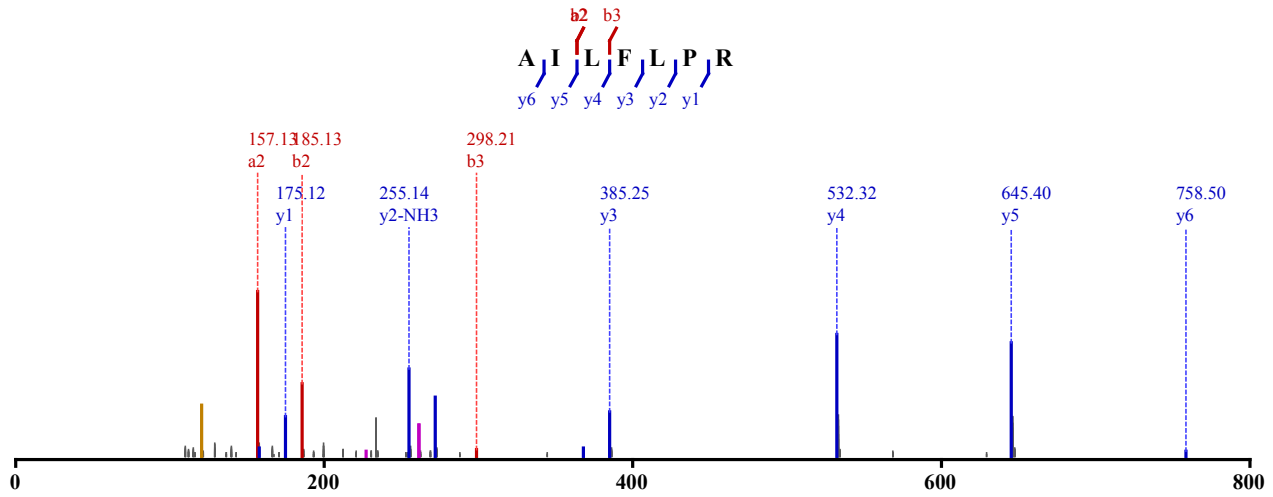

Not Modified  
 Identified in MSS295 with qvalue 0.01  
 Charge: 2, Exp. m/z: 415.269, Calc. m/z: 415.268  
 Data File: HeLa\_ArgC\_CID-ETD\_1, Scans: 16558 - 16558

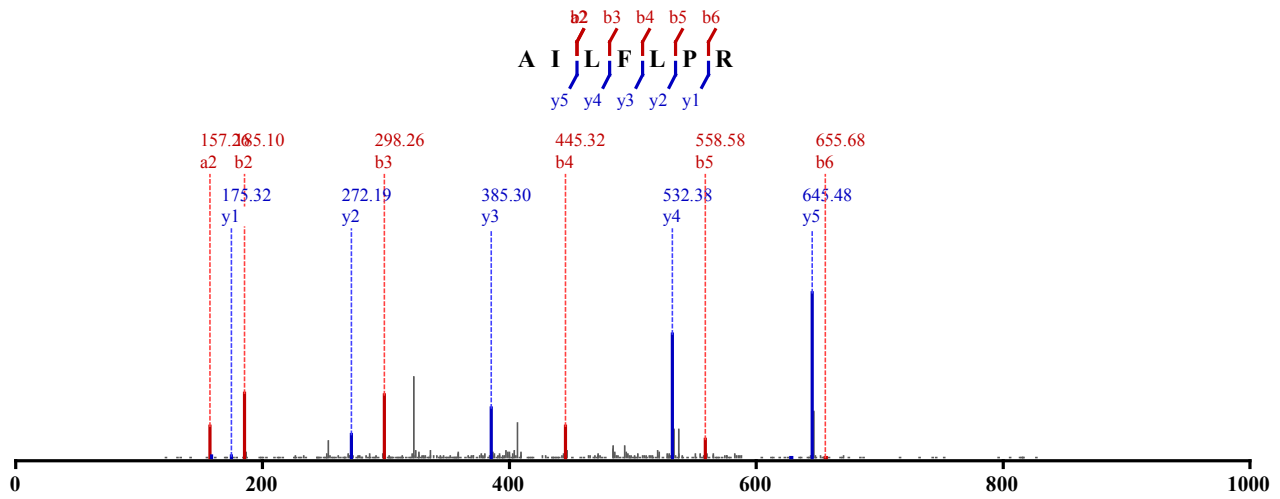

Not Modified  
 Identified in MSS295 with qvalue 0.01  
 Charge: 2, Exp. m/z: 415.269, Calc. m/z: 415.268  
 Data File: HeLa\_ArgC\_CID-ETD\_3, Scans: 17184 - 17184

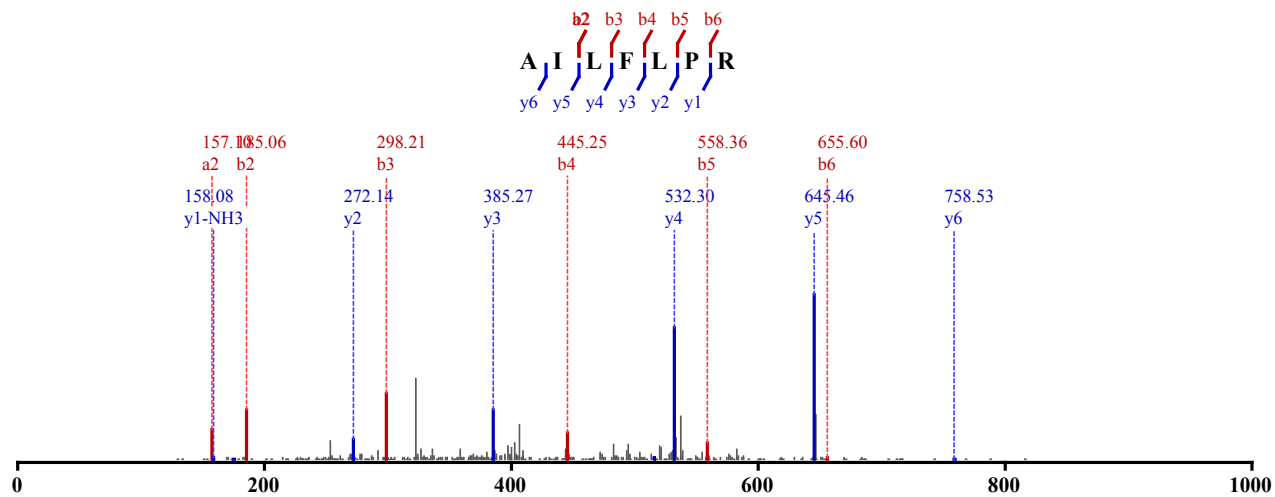

Not Modified  
 Identified in MSS291 with qvalue 0.00  
 Charge: 2, Exp. m/z: 415.269, Calc. m/z: 415.268  
 Data File: HeLa\_ArgC-Elastase\_CID\_1, Scans: 27929 - 27929

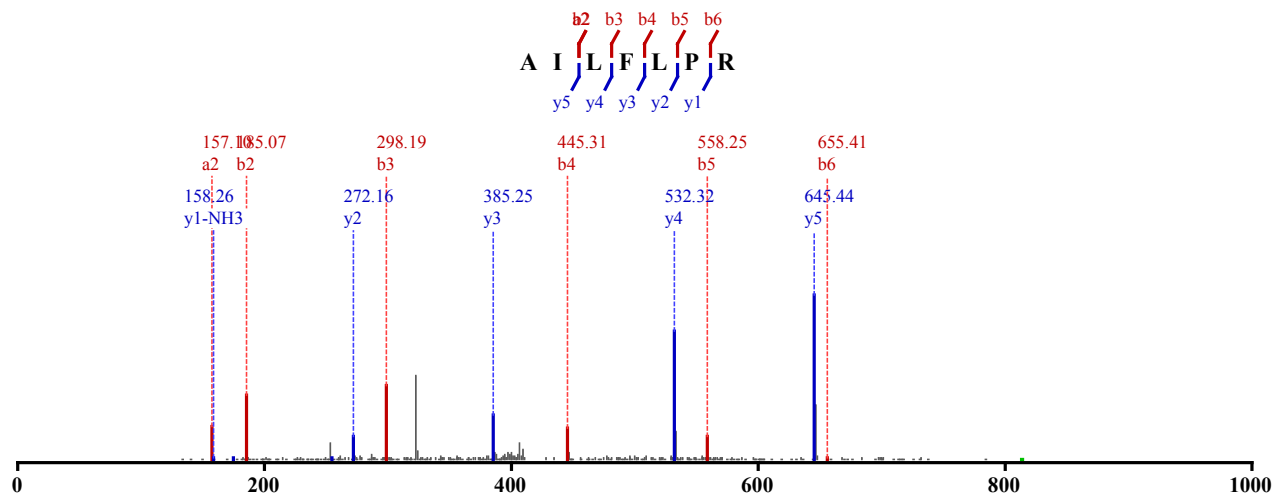

Not Modified  
 Identified in MSS291 with qvalue 0.00  
 Charge: 2, Exp. m/z: 415.269, Calc. m/z: 415.268  
 Data File: HeLa\_ArgC-Elastase\_CID\_2, Scans: 27552 - 27552

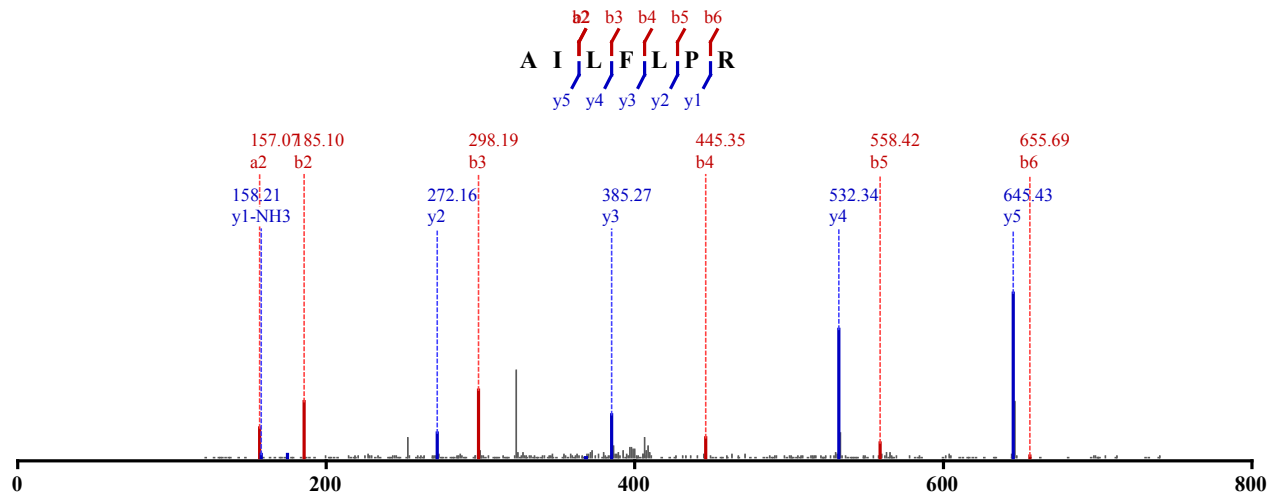

Not Modified  
 Identified in MSS305 with qvalue 0.00  
 Charge: 2, Exp. m/z: 415.268, Calc. m/z: 415.268



Data File: HeLa\_ArgC-Elastase\_HCD\_3, Scans: 29143 - 29143

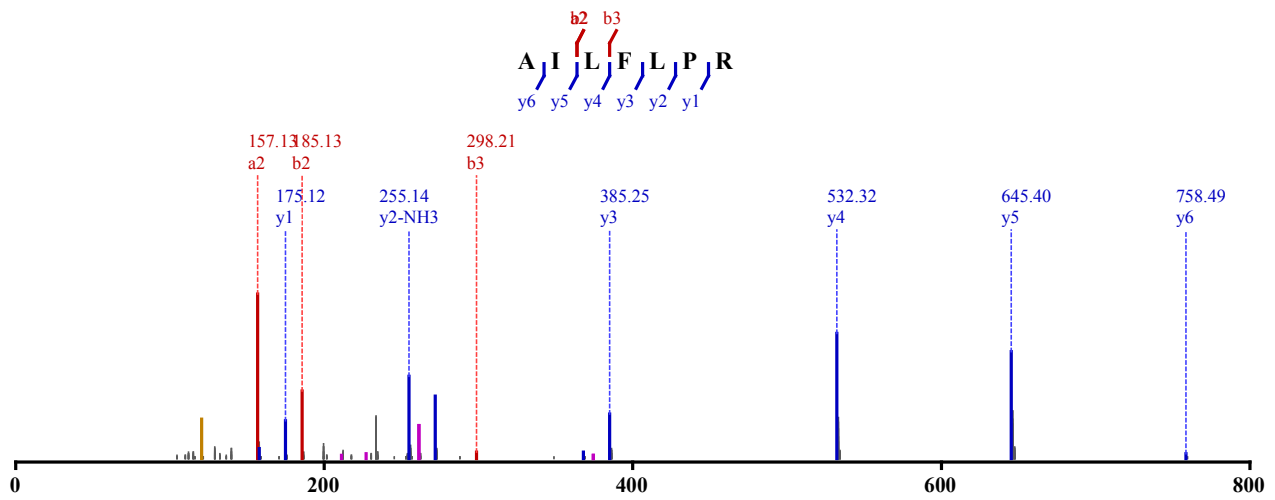

Not Modified

Identified in MSS405 with qvalue 0.01

Charge: 2, Exp. m/z: 415.269, Calc. m/z: 415.268

Data File: HeLa\_CET\_HCD\_1, Scans: 32976 - 32976

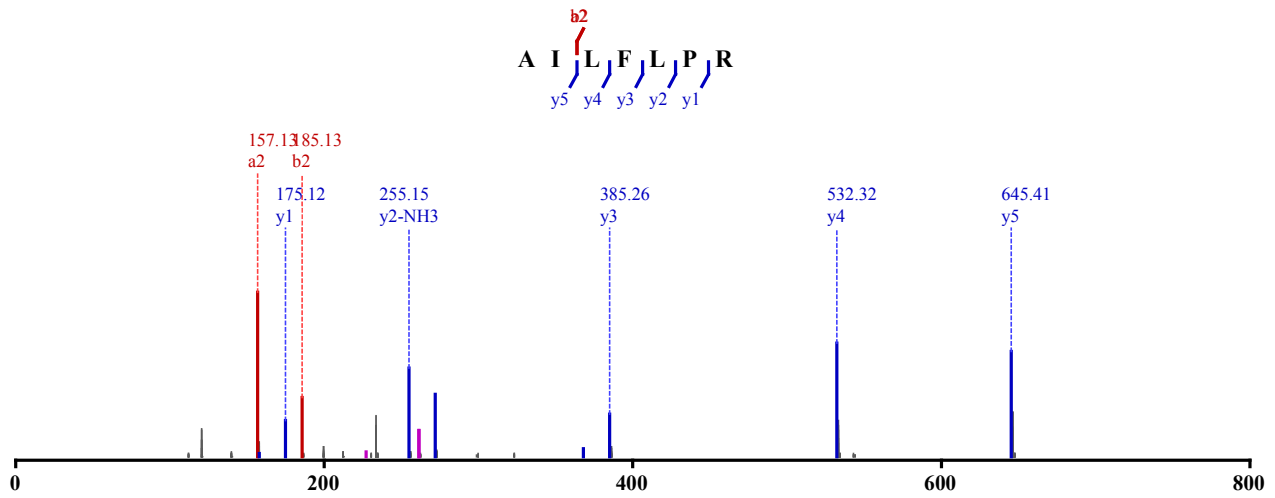

Not Modified

Identified in MSS404 with qvalue 0.01

Charge: 2, Exp. m/z: 415.268, Calc. m/z: 415.268

Data File: HeLa\_ALT\_HCD\_1, Scans: 32804 - 32804

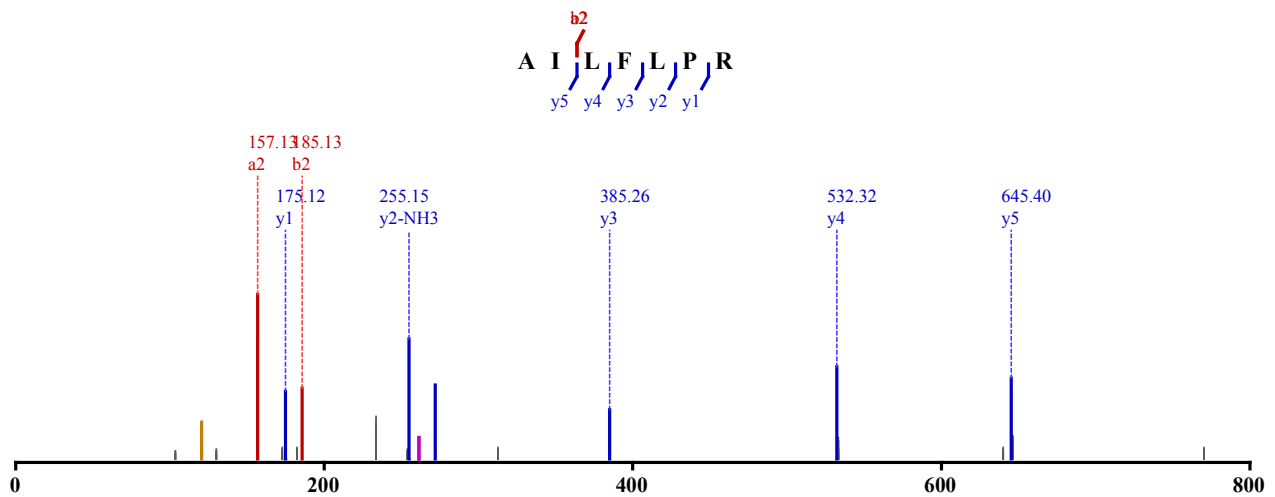

Not Modified

Identified in MSS416 with qvalue 0.00  
 Charge: 2, Exp. m/z: 415.269, Calc. m/z: 415.268  
 Data File: HeLa\_ArgC-Chytry\_CID-ETD\_1, Scans: 17989 - 17989

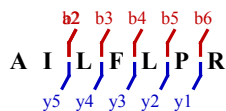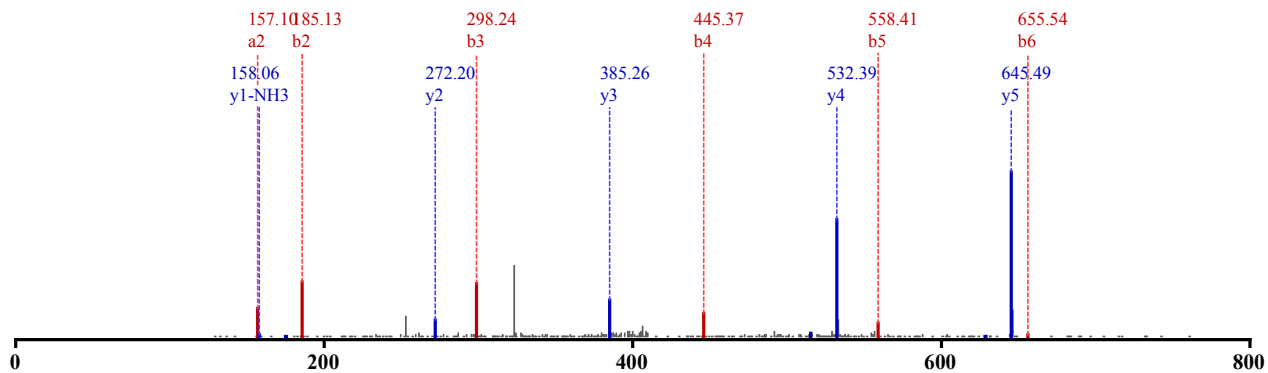

Not Modified  
 Identified in MSS417 with qvalue 0.00  
 Charge: 2, Exp. m/z: 415.269, Calc. m/z: 415.268  
 Data File: HeLa\_ArgC-Elastase\_CID-ETD\_1, Scans: 19433 - 19433

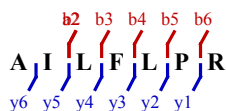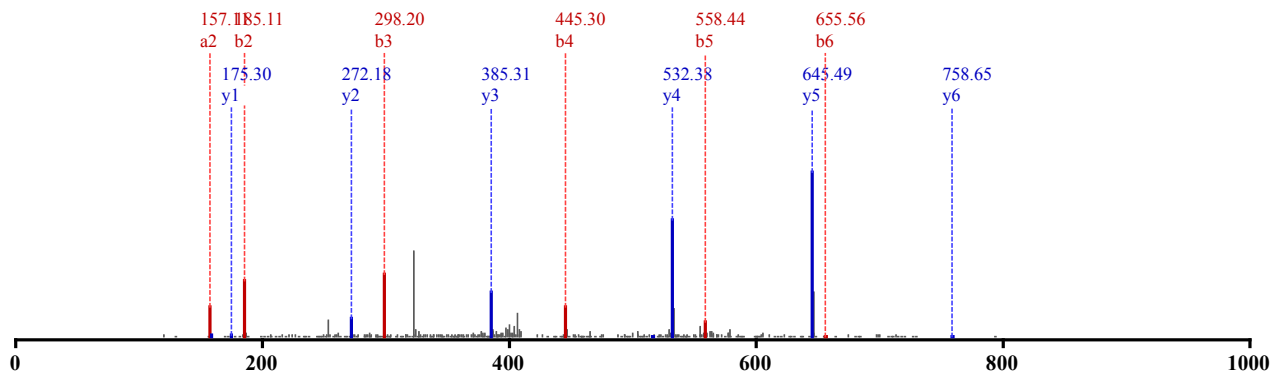

Not Modified  
 Identified in MSS417 with qvalue 0.00  
 Charge: 2, Exp. m/z: 415.269, Calc. m/z: 415.268  
 Data File: HeLa\_ArgC-Elastase\_CID-ETD\_1, Scans: 19503 - 19503

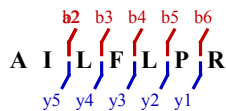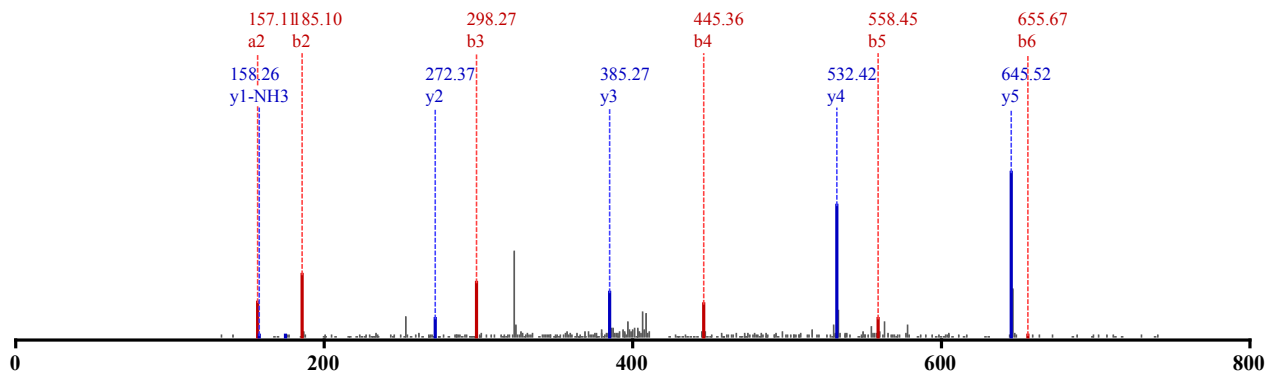

Not Modified

Identified in MSS425 with qvalue 0.00

Charge: 2, Exp. m/z: 415.268, Calc. m/z: 415.268

Data File: HeLa\_AspN-Try\_CID-ETD\_1, Scans: 23754 - 23754

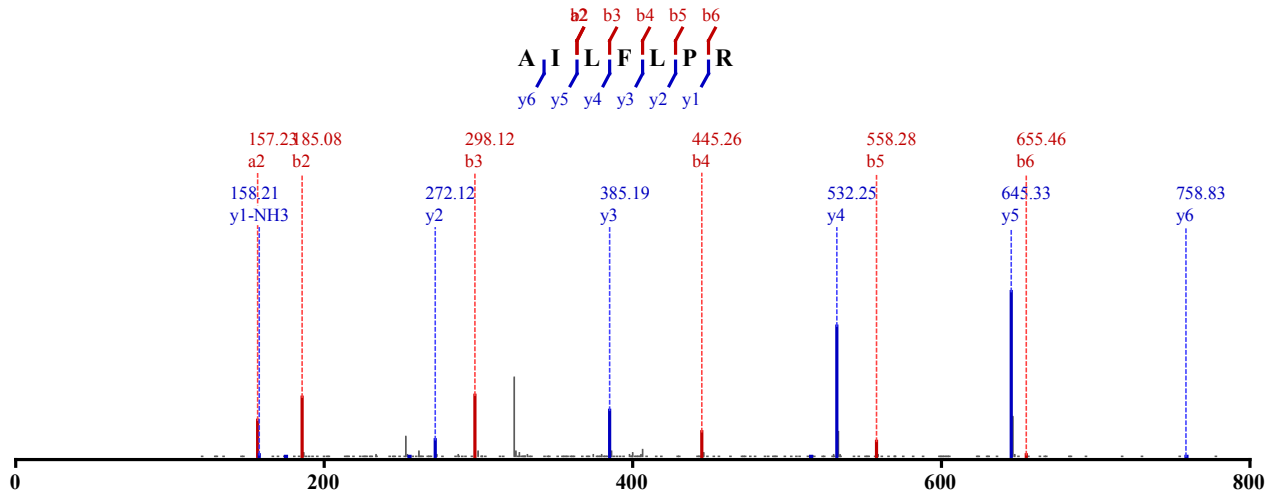

Not Modified

Identified in MSS425 with qvalue 0.00

Charge: 2, Exp. m/z: 415.268, Calc. m/z: 415.268

Data File: HeLa\_AspN-Try\_CID-ETD\_1, Scans: 23821 - 23821

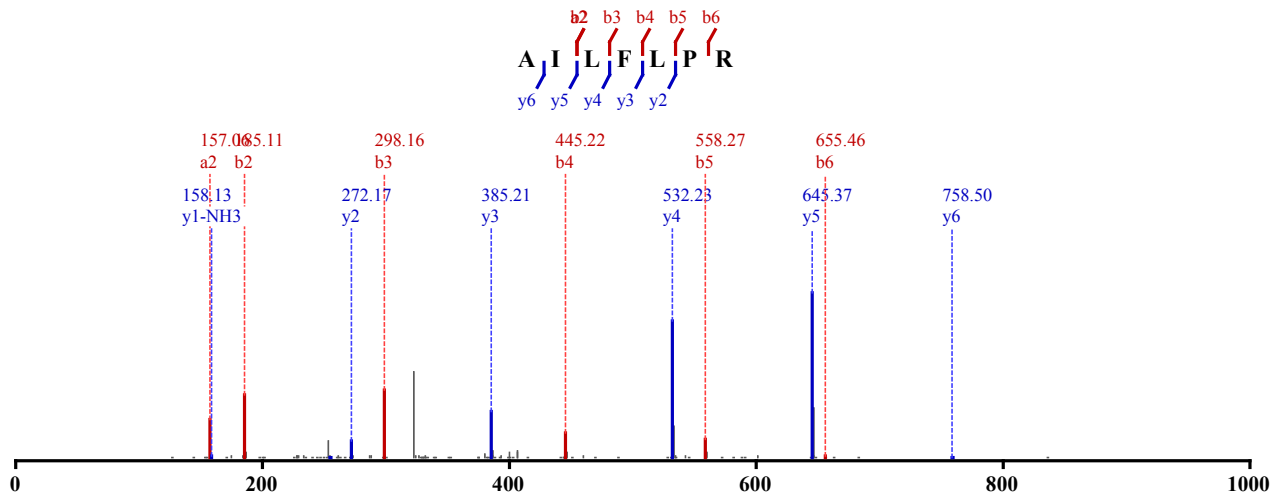

Not Modified

Identified in MSS427 with qvalue 0.00

Charge: 2, Exp. m/z: 415.269, Calc. m/z: 415.268

Data File: HeLa\_chytry-try\_CID-ETD\_1, Scans: 22801 - 22801

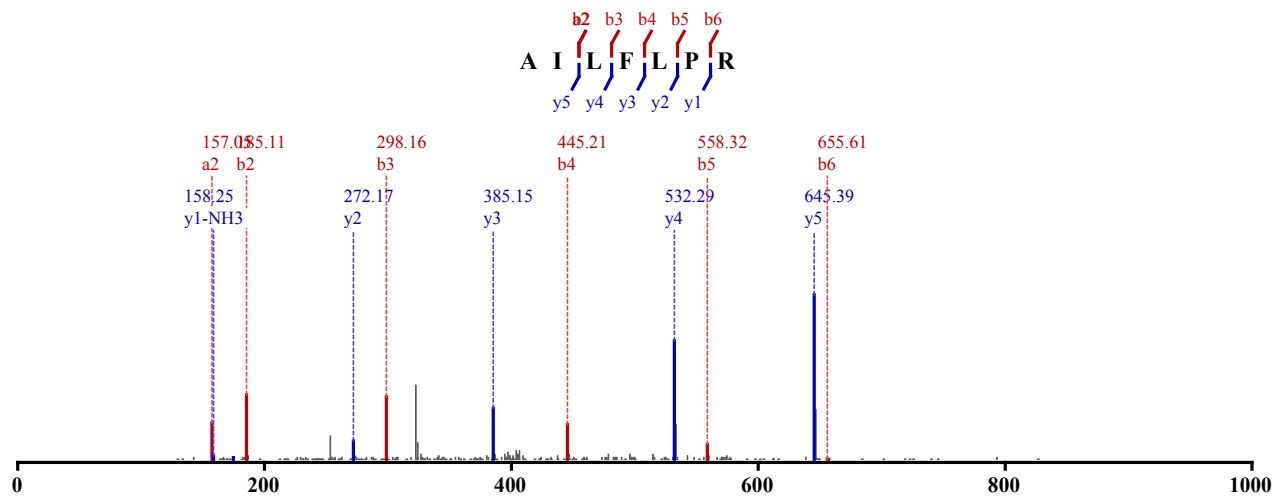

Not Modified  
 Identified in MSS427 with qvalue 0.00  
 Charge: 2, Exp. m/z: 415.269, Calc. m/z: 415.268  
 Data File: HeLa\_chytry-try\_CID-ETD\_2, Scans: 24367 - 24367

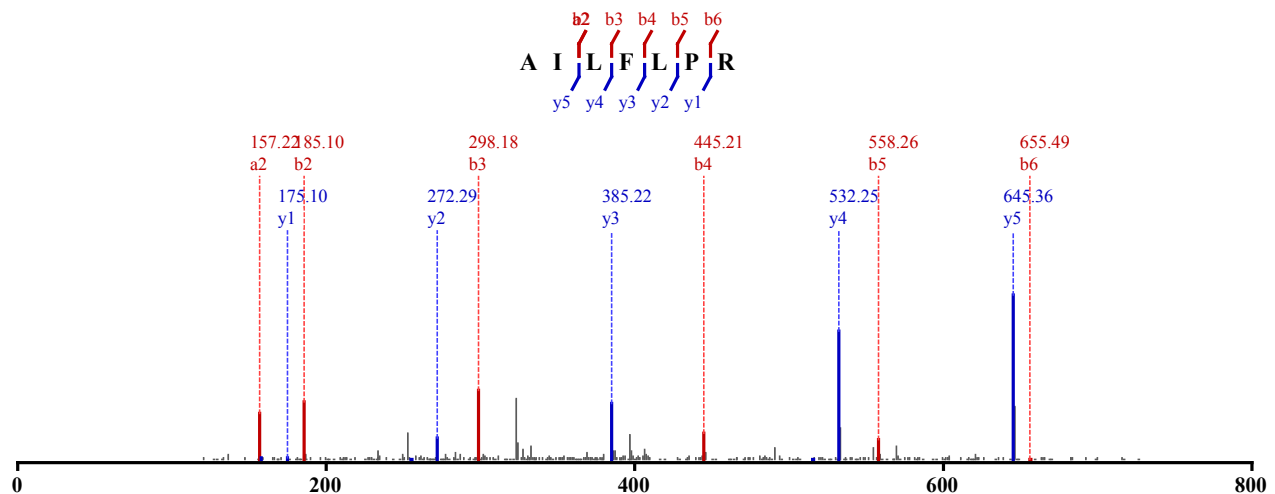

Not Modified  
 Identified in MSS431 with qvalue 0.00  
 Charge: 2, Exp. m/z: 415.269, Calc. m/z: 415.268  
 Data File: HeLa\_GluC-Try\_CID-ETD\_2, Scans: 24041 - 24041

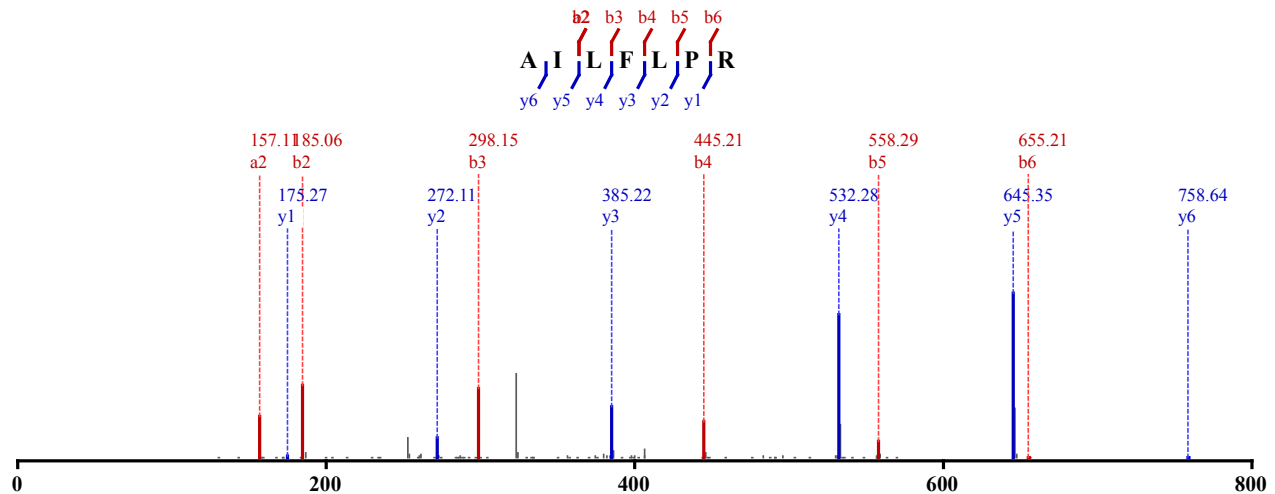

Not Modified  
 Identified in MSS488 with qvalue 0.00  
 Charge: 2, Exp. m/z: 415.268, Calc. m/z: 415.268

Data File: HeLa\_chy-try\_pH4\_CID\_3xload\_3, Scans: 31975 - 31975

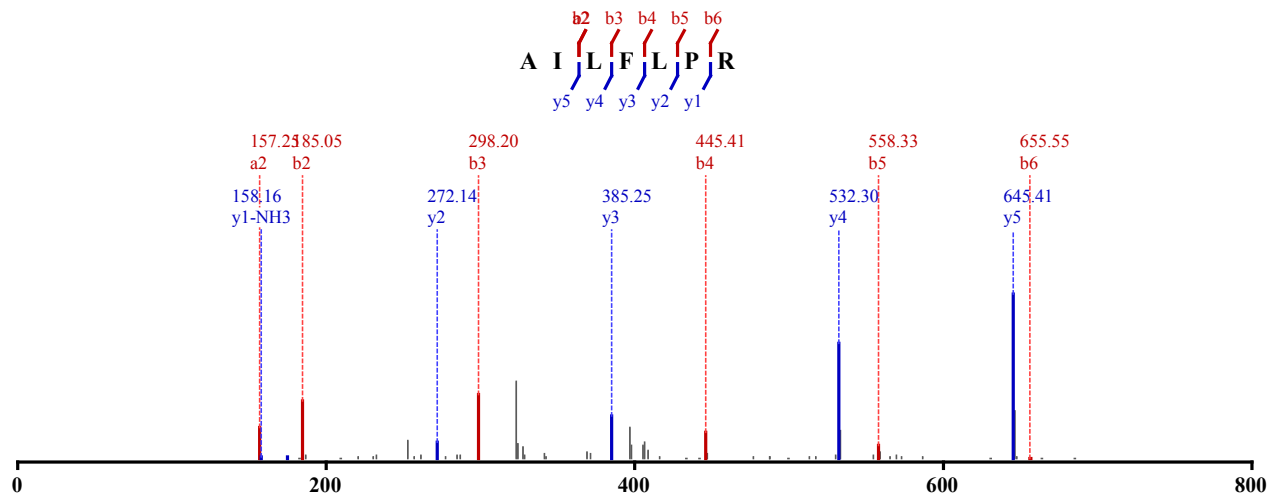

Not Modified

Identified in MSS488 with qvalue 0.00

Charge: 2, Exp. m/z: 415.268, Calc. m/z: 415.268

Data File: HeLa\_chy-try\_pH4\_CID\_3xload\_3, Scans: 32052 - 32052

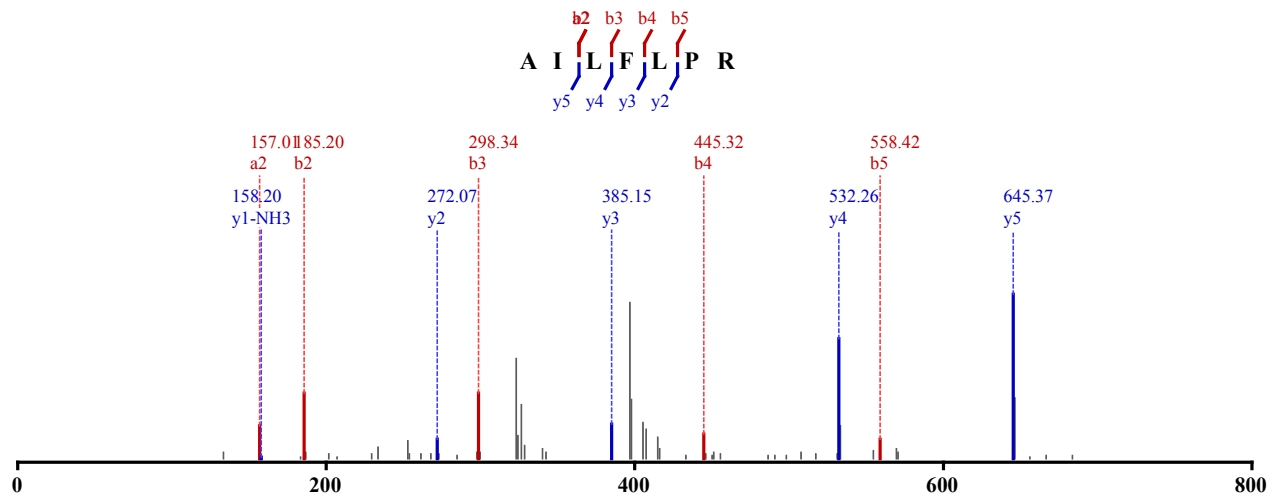

Not Modified

Identified in MSS488 with qvalue 0.00

Charge: 2, Exp. m/z: 415.268, Calc. m/z: 415.268

Data File: HeLa\_chy-try\_pH4\_CID\_3xload, Scans: 35920 - 35920

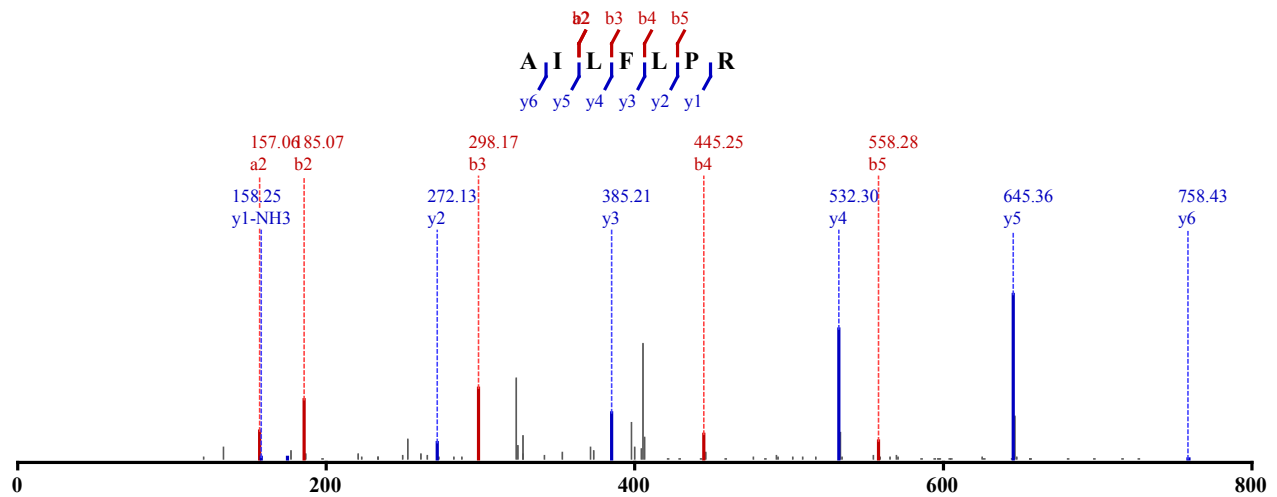

Not Modified

Identified in MSS488 with qvalue 0.00  
Charge: 2, Exp. m/z: 415.268, Calc. m/z: 415.268  
Data File: HeLa\_chy-try\_pH5\_CID\_3xload\_2, Scans: 34223 - 34223

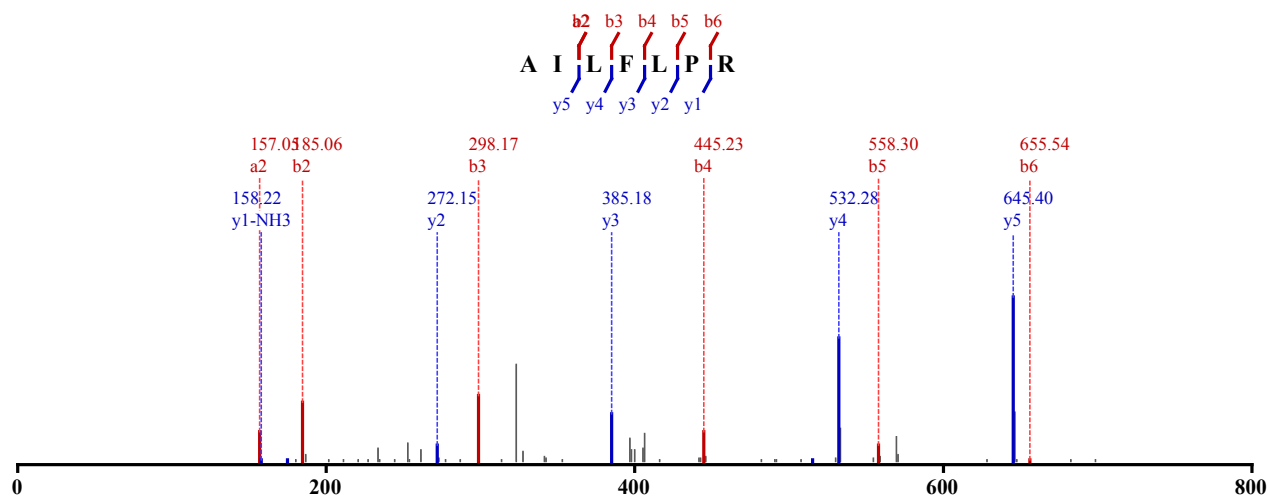

Not Modified  
Identified in MSS488 with qvalue 0.00  
Charge: 2, Exp. m/z: 415.268, Calc. m/z: 415.268  
Data File: HeLa\_chy-try\_pH5\_CID\_3xload\_2, Scans: 34280 - 34280

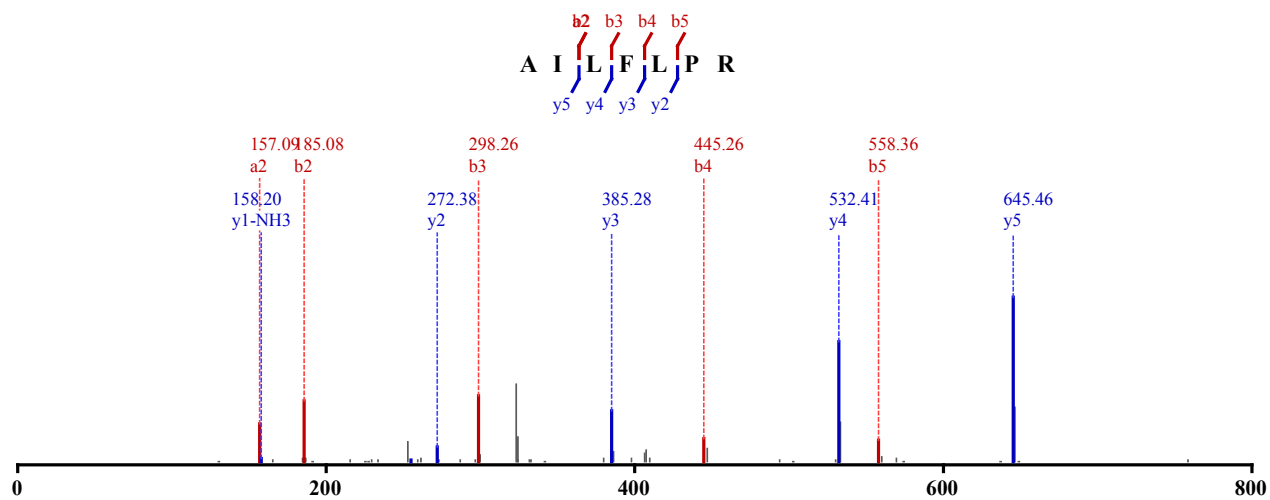

Not Modified  
Identified in MSS488 with qvalue 0.00  
Charge: 2, Exp. m/z: 415.268, Calc. m/z: 415.268  
Data File: HeLa\_chy-try\_pH5\_CID\_3xload\_2, Scans: 34345 - 34345

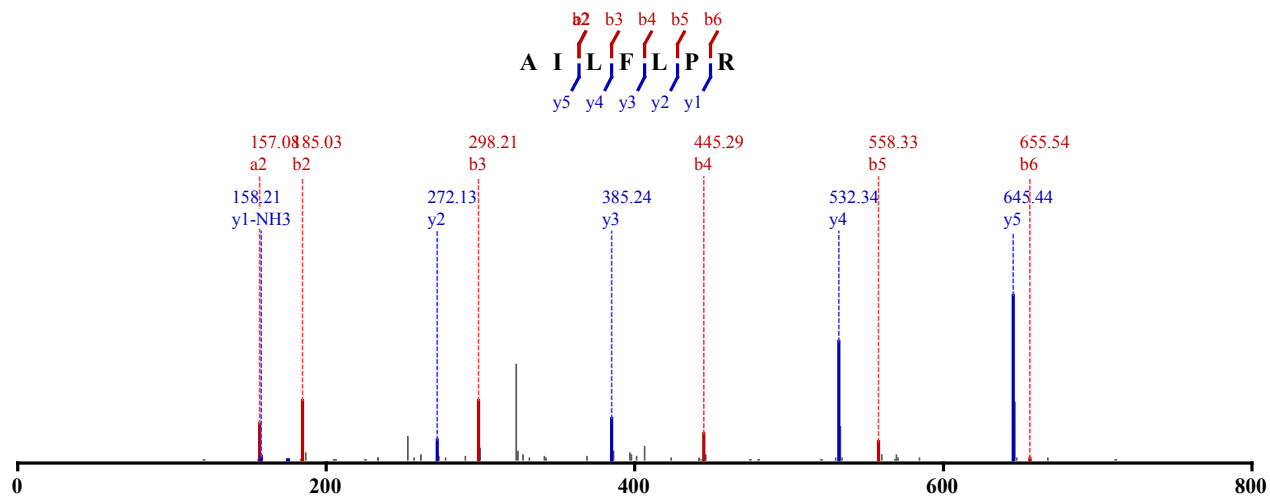

Not Modified

Identified in MSS488 with qvalue 0.00

Charge: 2, Exp. m/z: 415.268, Calc. m/z: 415.268

Data File: HeLa\_chy-try\_pH5\_CID\_3xload\_2, Scans: 34416 - 34416

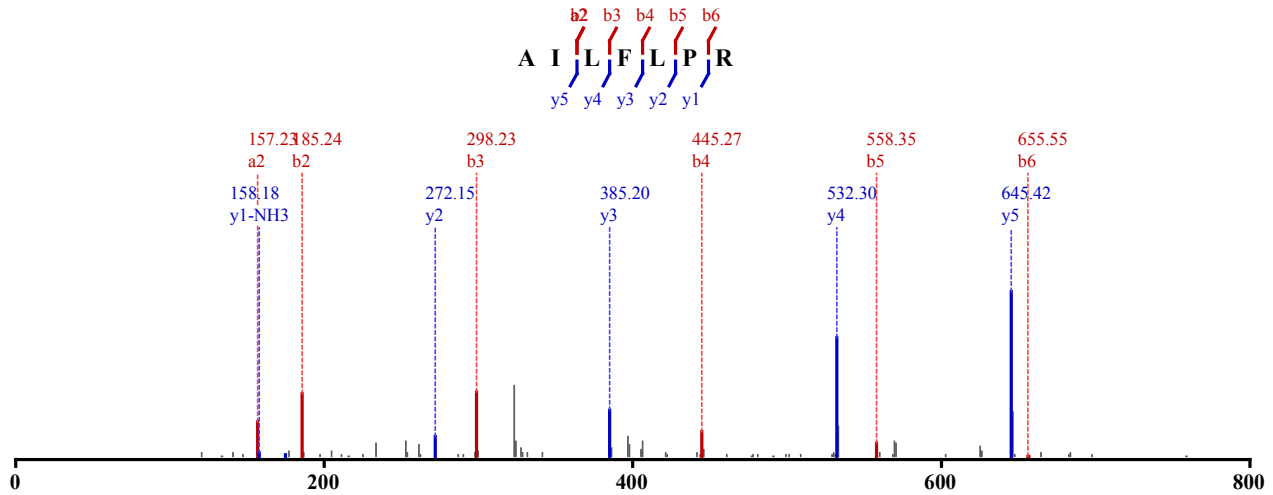

Not Modified

Identified in MSS488 with qvalue 0.00

Charge: 2, Exp. m/z: 415.268, Calc. m/z: 415.268

Data File: HeLa\_chy-try\_pH5\_CID\_3xload\_3, Scans: 33647 - 33647

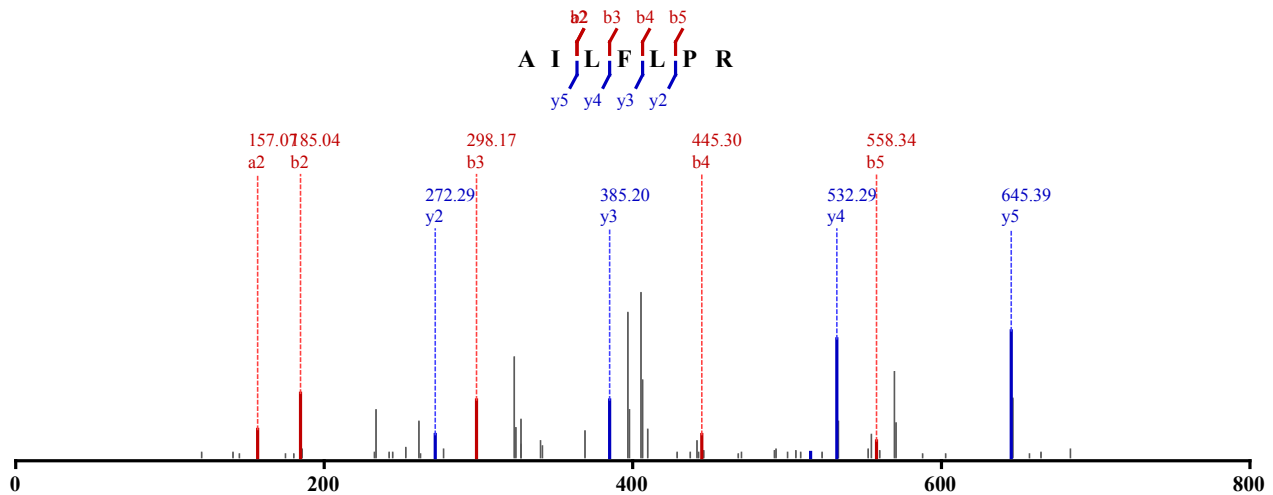

Not Modified

Identified in MSS488 with qvalue 0.00

Charge: 2, Exp. m/z: 415.268, Calc. m/z: 415.268

Data File: HeLa\_chy-try\_pH5\_CID\_3xload\_3, Scans: 33712 - 33712

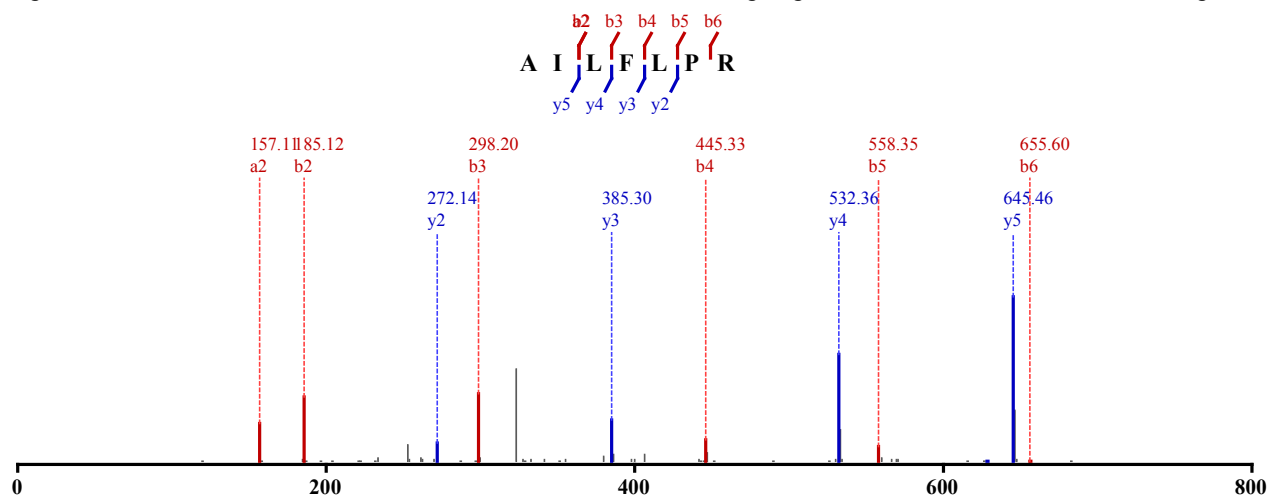

Not Modified

Identified in MSS488 with qvalue 0.00

Charge: 2, Exp. m/z: 415.268, Calc. m/z: 415.268

Data File: HeLa\_chy-try\_pH5\_CID\_3xload\_3, Scans: 33782 - 33782

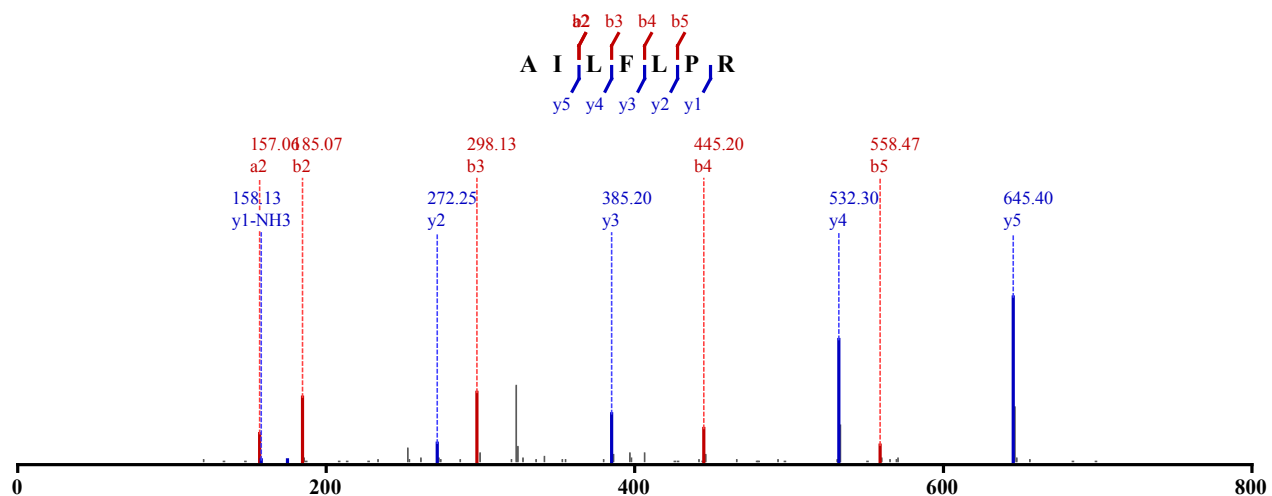

Not Modified

Identified in MSS488 with qvalue 0.00

Charge: 2, Exp. m/z: 415.268, Calc. m/z: 415.268

Data File: HeLa\_chy-try\_pH5\_CID\_3xload\_3, Scans: 33853 - 33853

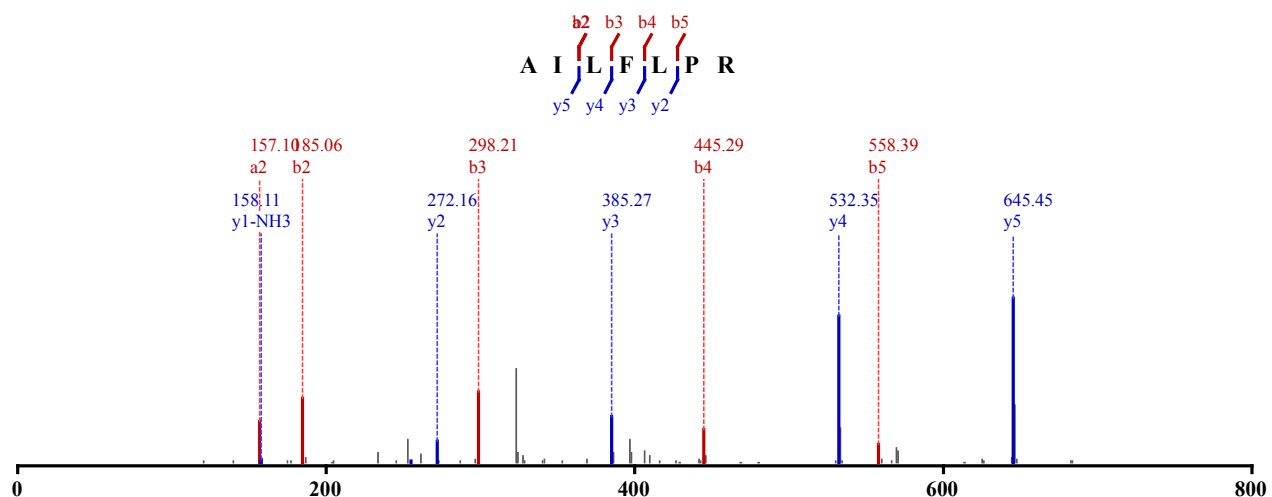

Not Modified

Identified in MSS488 with qvalue 0.00

Charge: 2, Exp. m/z: 415.268, Calc. m/z: 415.268



Data File: HeLa\_chy-try\_pH5\_CID\_3xload\_3, Scans: 34215 - 34215

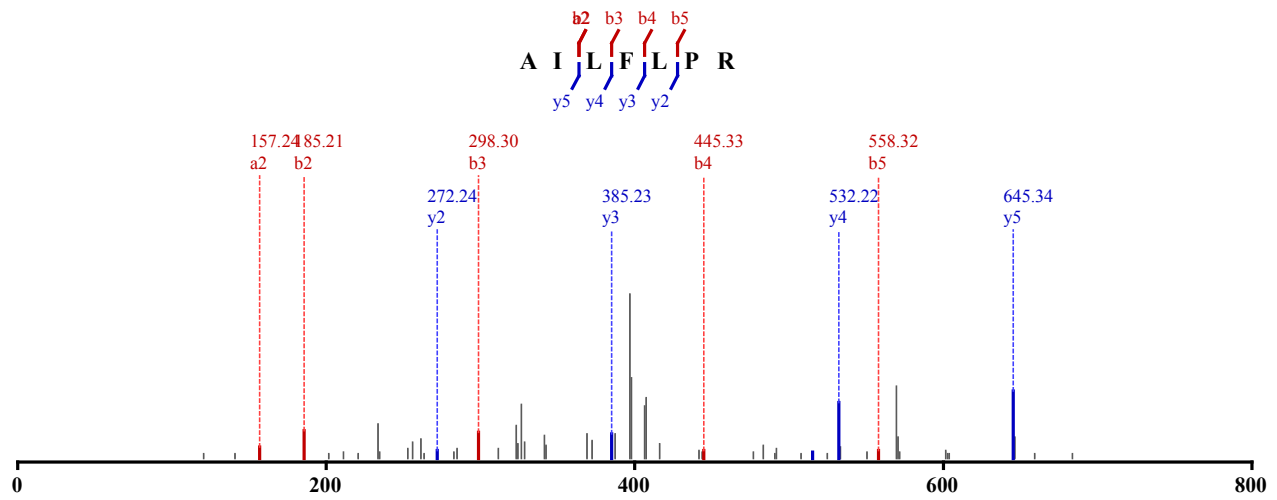

Not Modified

Identified in MSS488 with qvalue 0.00

Charge: 2, Exp. m/z: 415.268, Calc. m/z: 415.268

Data File: HeLa\_chy-try\_pH5\_CID\_3xload, Scans: 38379 - 38379

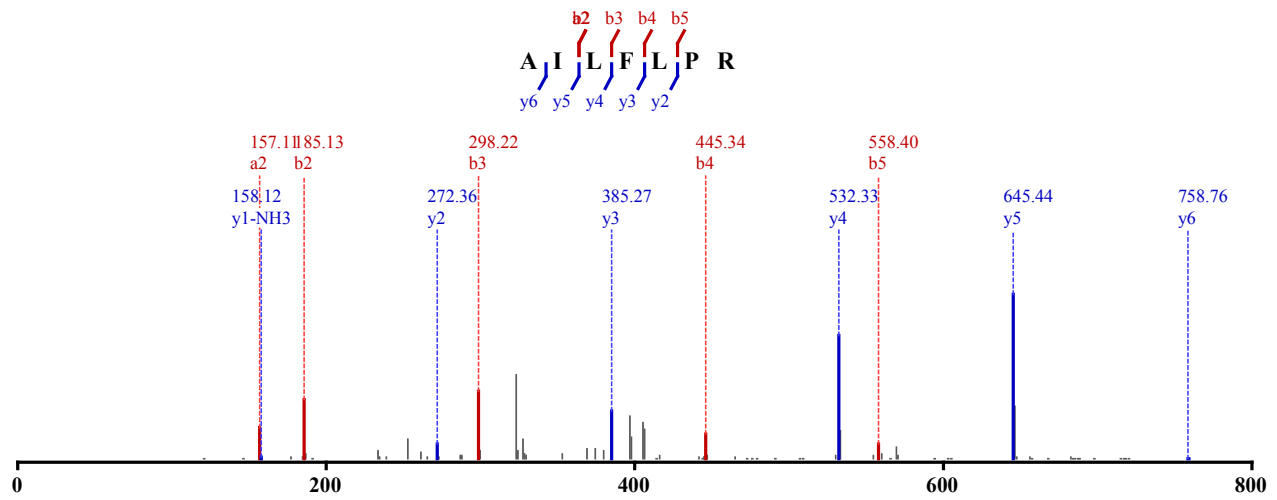

Not Modified

Identified in MSS488 with qvalue 0.00

Charge: 2, Exp. m/z: 415.268, Calc. m/z: 415.268

Data File: HeLa\_chy-try\_pH5\_CID\_3xload, Scans: 38439 - 38439

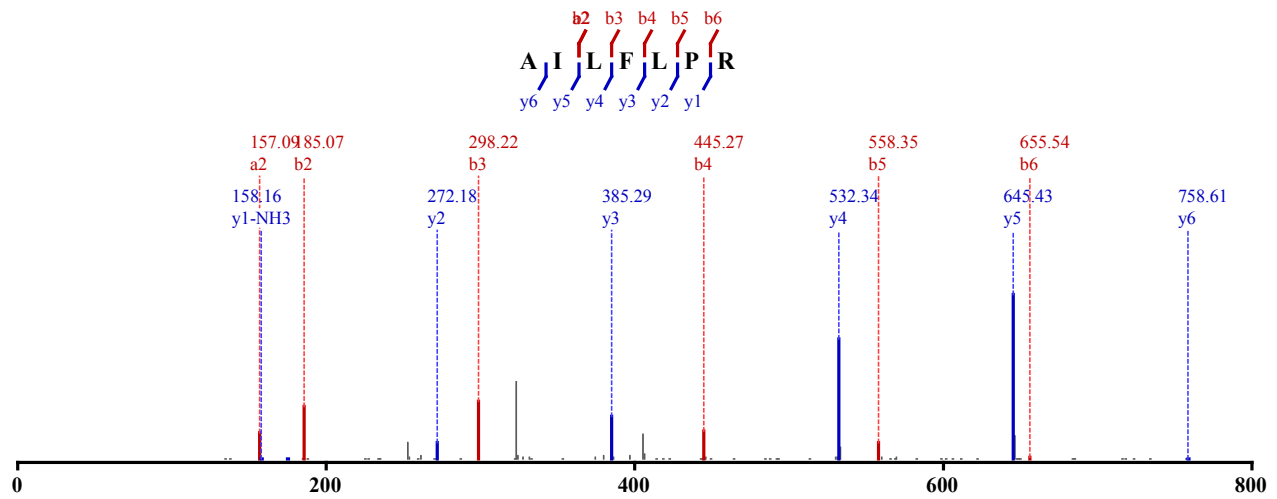

Not Modified

Identified in MSS488 with qvalue 0.00  
 Charge: 2, Exp. m/z: 415.269, Calc. m/z: 415.268  
 Data File: HeLa\_chy-try\_pH6\_CID\_3xload\_2, Scans: 39982 - 39982

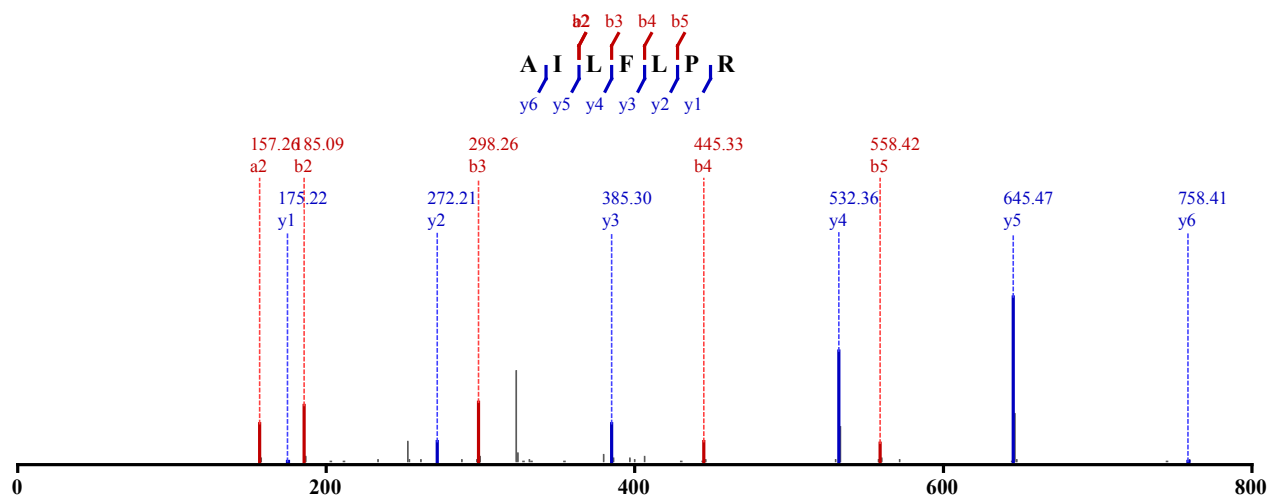

Not Modified  
 Identified in MSS488 with qvalue 0.00  
 Charge: 2, Exp. m/z: 415.268, Calc. m/z: 415.268  
 Data File: HeLa\_chy-try\_pH6\_CID\_3xload\_2, Scans: 40052 - 40052

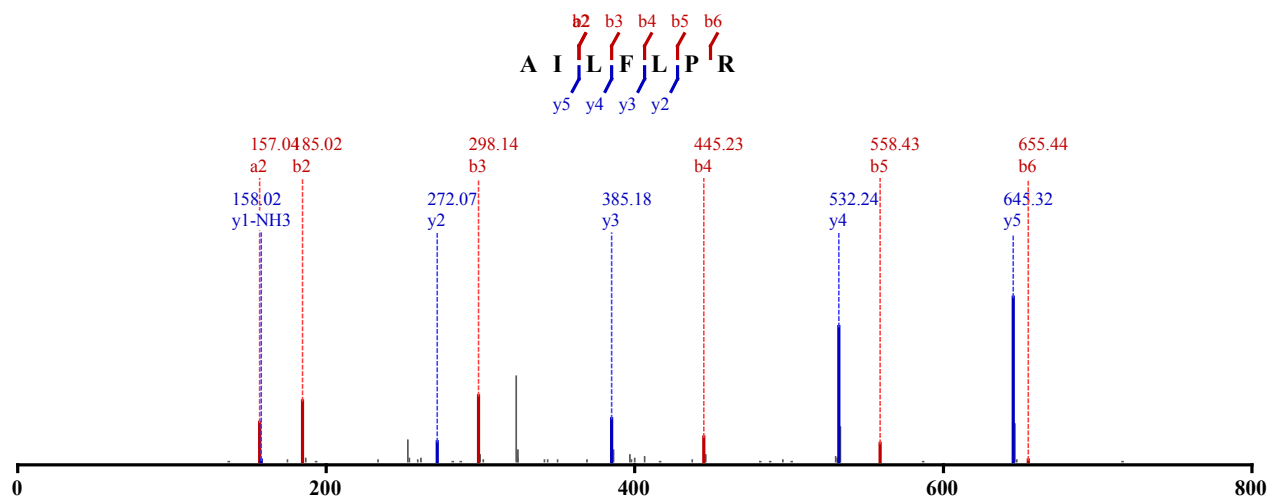

Not Modified  
 Identified in MSS488 with qvalue 0.00  
 Charge: 2, Exp. m/z: 415.268, Calc. m/z: 415.268  
 Data File: HeLa\_chy-try\_pH6\_CID\_3xload\_2, Scans: 40189 - 40189

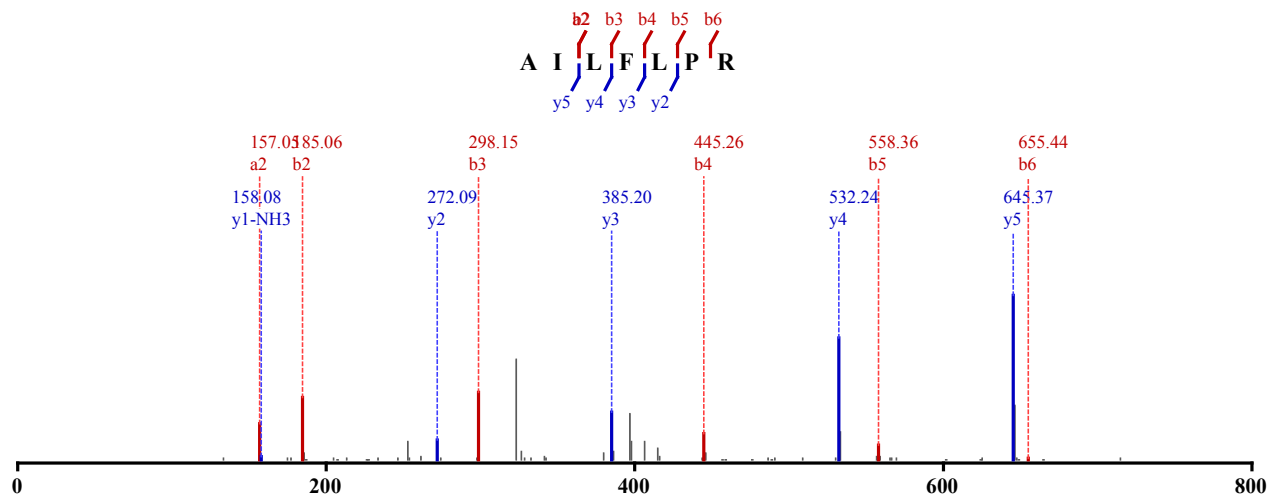

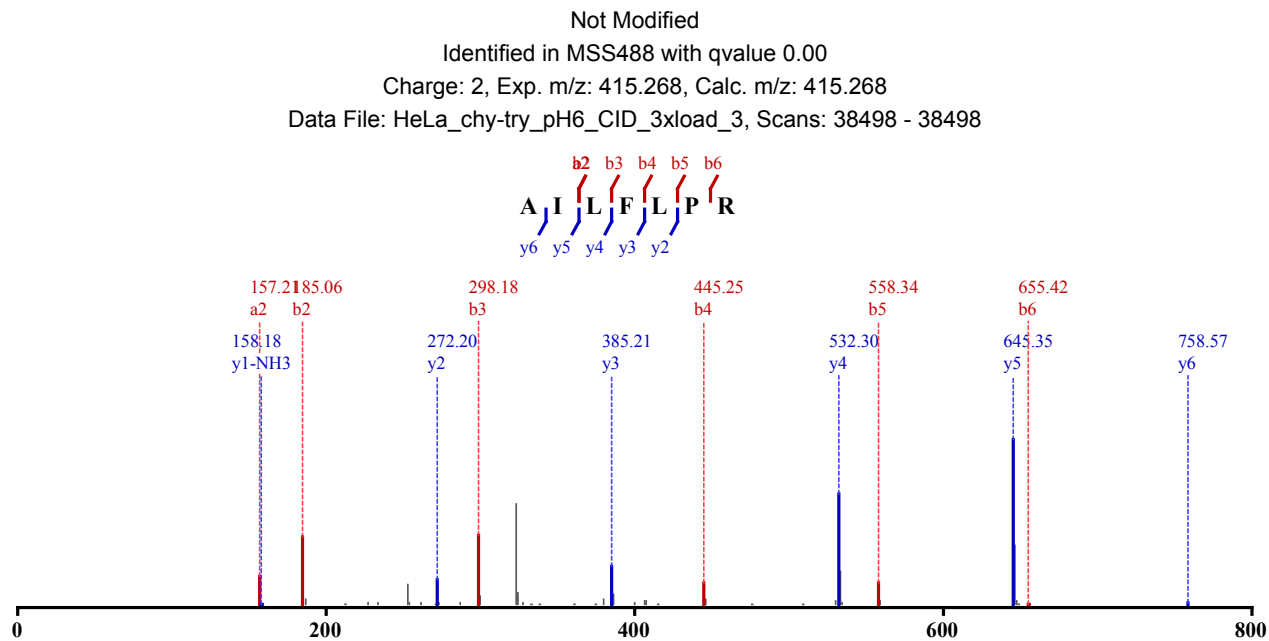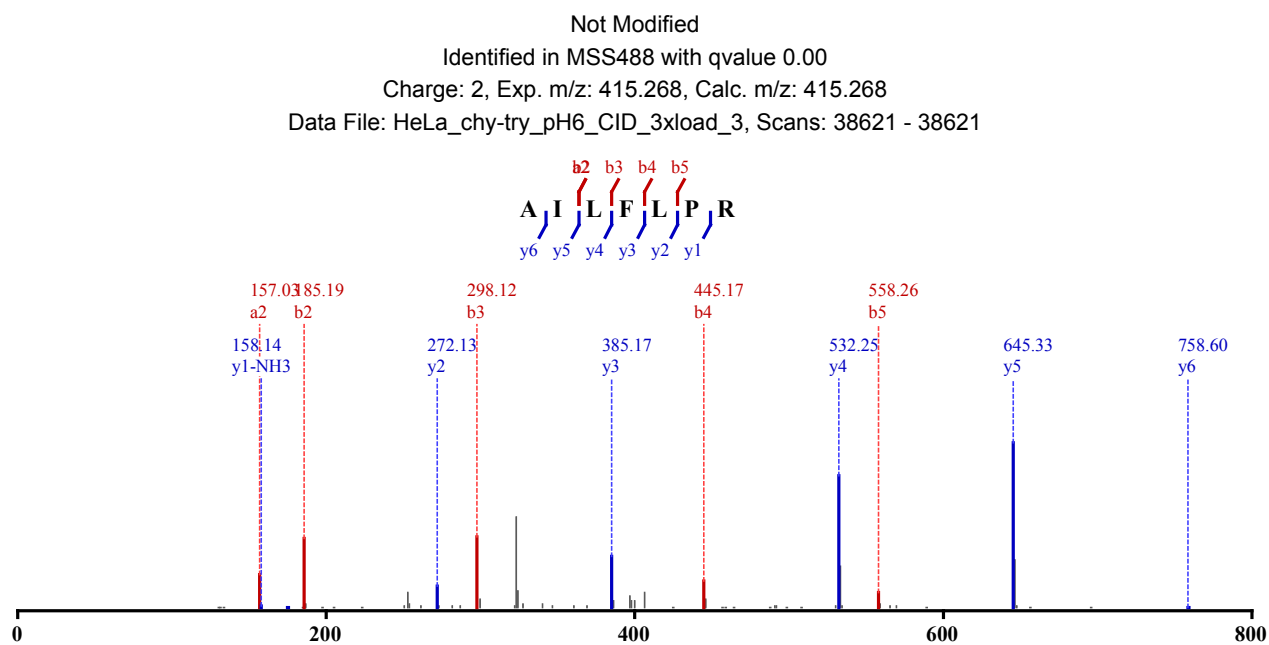

Not Modified  
Identified in MSS488 with qvalue 0.00  
Charge: 2, Exp. m/z: 415.268, Calc. m/z: 415.268  
Data File: HeLa\_chy-try\_pH6\_CID\_3xload\_3, Scans: 38677 - 38677

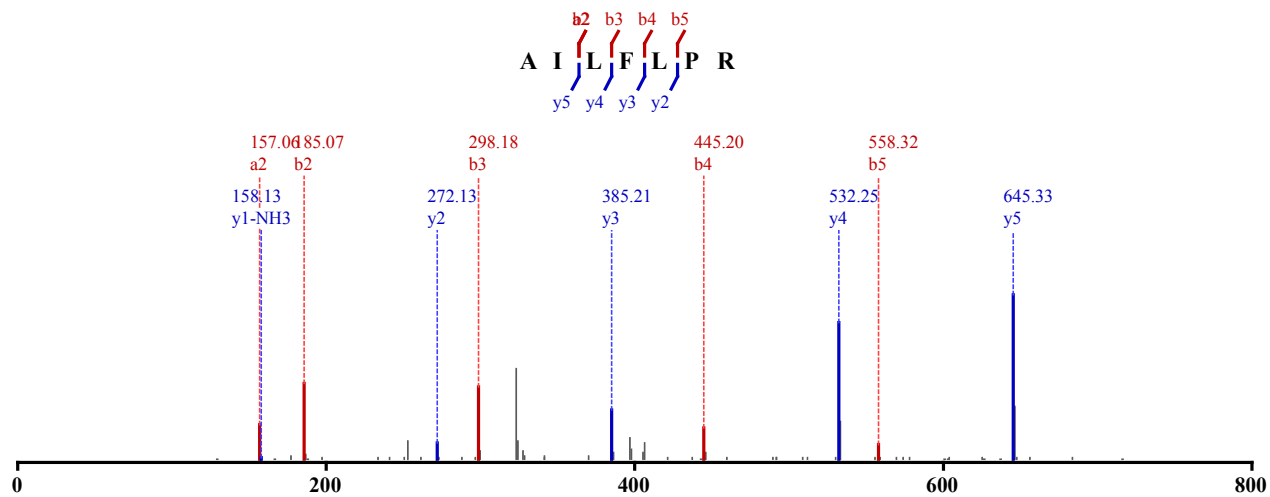

Not Modified

Identified in MSS488 with qvalue 0.00

Charge: 2, Exp. m/z: 415.268, Calc. m/z: 415.268

Data File: HeLa\_chy-try\_pH6\_CID\_3xload\_3, Scans: 38746 - 38746

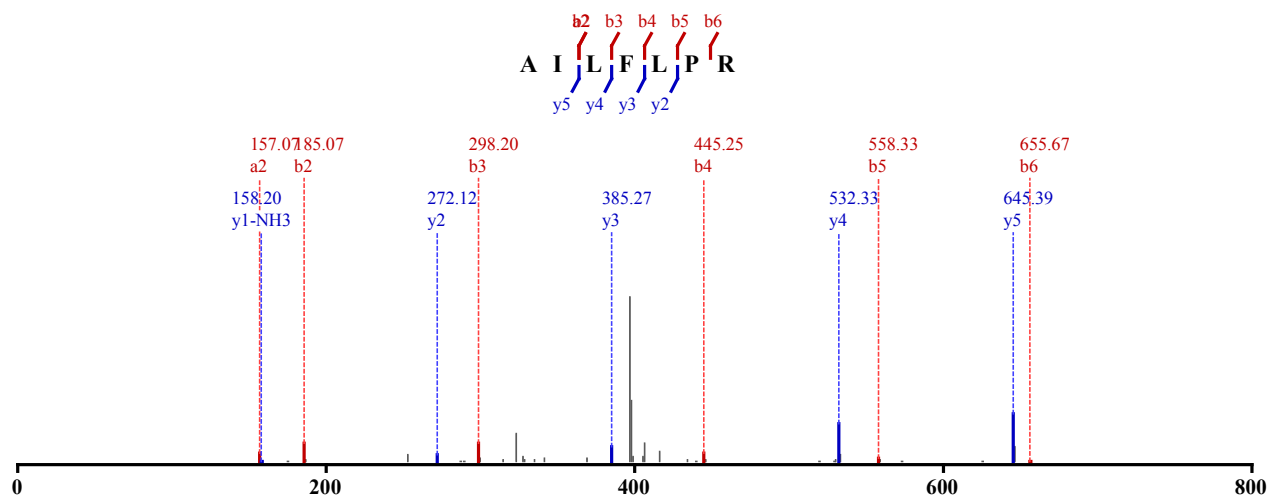

Not Modified

Identified in MSS488 with qvalue 0.00

Charge: 2, Exp. m/z: 415.268, Calc. m/z: 415.268

Data File: HeLa\_chy-try\_pH6\_CID\_3xload\_3, Scans: 38814 - 38814

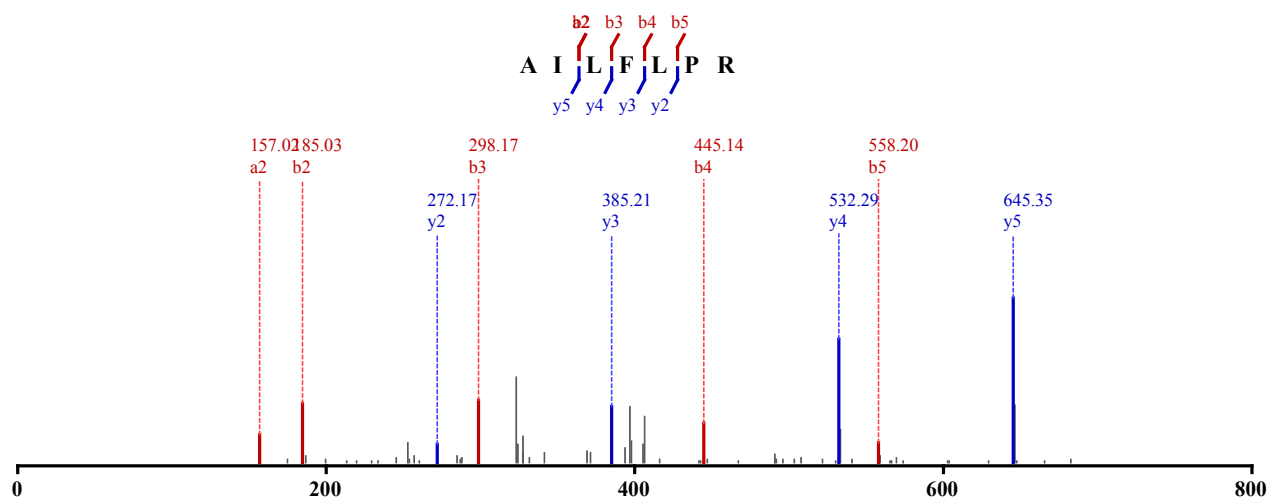

Not Modified

Identified in MSS488 with qvalue 0.00

Charge: 2, Exp. m/z: 415.268, Calc. m/z: 415.268

Data File: HeLa\_chy-try\_pH6\_CID\_3xload\_3, Scans: 39097 - 39097

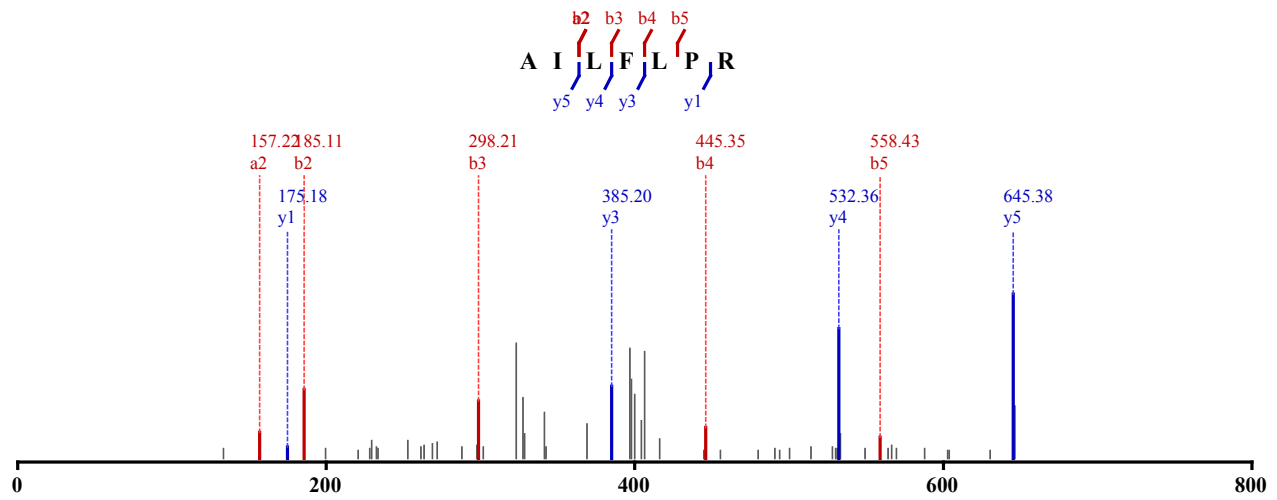

Not Modified

Identified in MSS488 with qvalue 0.00

Charge: 2, Exp. m/z: 415.268, Calc. m/z: 415.268

Data File: HeLa\_chy-try\_pH6\_CID\_3xload\_3, Scans: 39168 - 39168

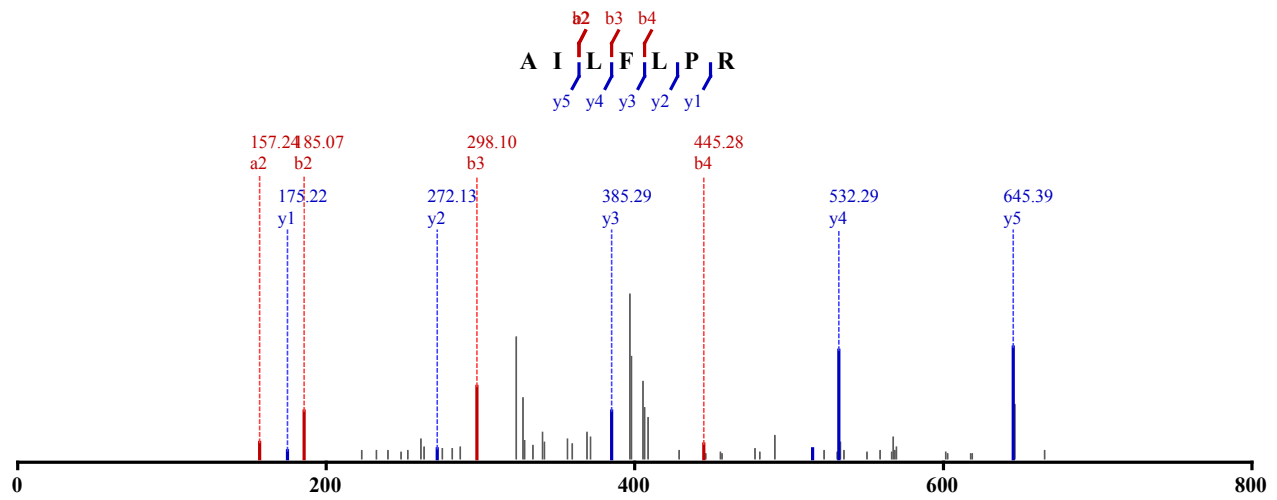

Not Modified

Identified in MSS488 with qvalue 0.00

Charge: 2, Exp. m/z: 415.268, Calc. m/z: 415.268

Data File: HeLa\_chy-try\_pH6\_CID\_3xload, Scans: 43910 - 43910

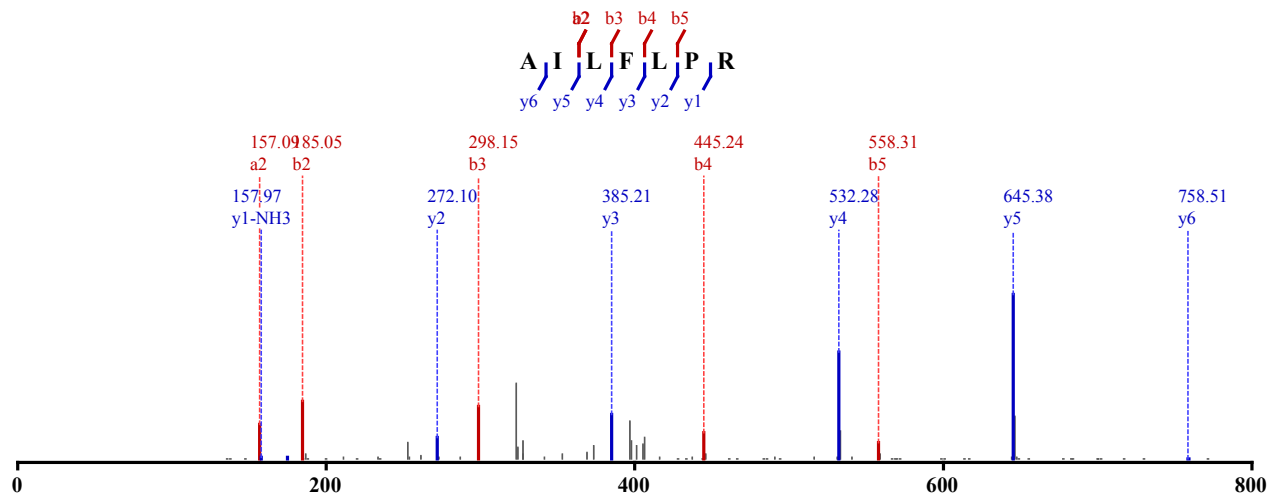

Not Modified

Identified in MSS488 with qvalue 0.00  
 Charge: 2, Exp. m/z: 415.268, Calc. m/z: 415.268  
 Data File: HeLa\_chy-try\_pH6\_CID\_3xload, Scans: 43974 - 43974

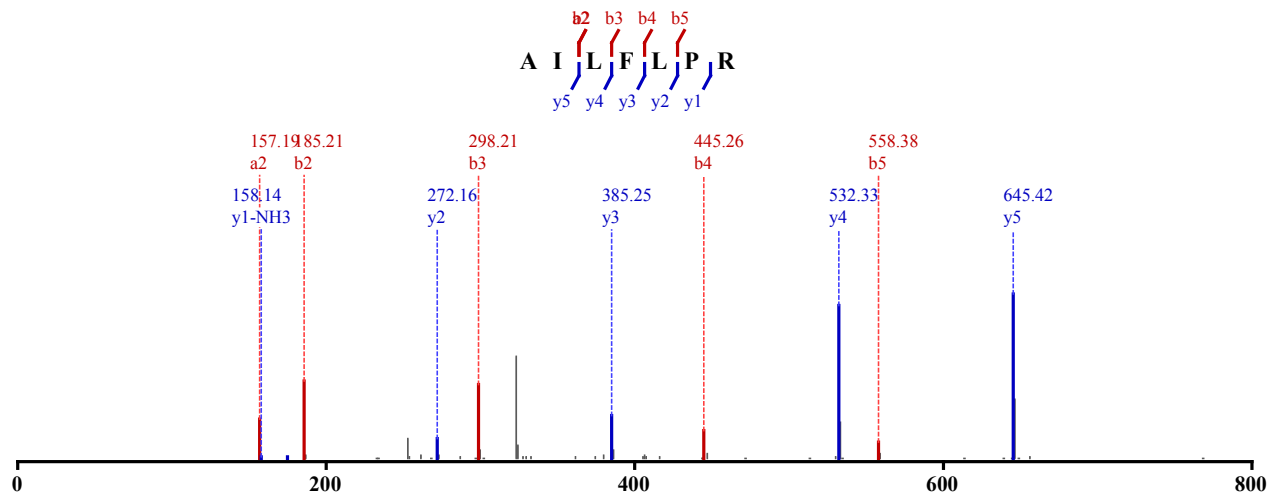

Not Modified  
 Identified in MSS488 with qvalue 0.00  
 Charge: 2, Exp. m/z: 415.268, Calc. m/z: 415.268  
 Data File: HeLa\_chy-try\_pH6\_CID\_3xload, Scans: 44044 - 44044

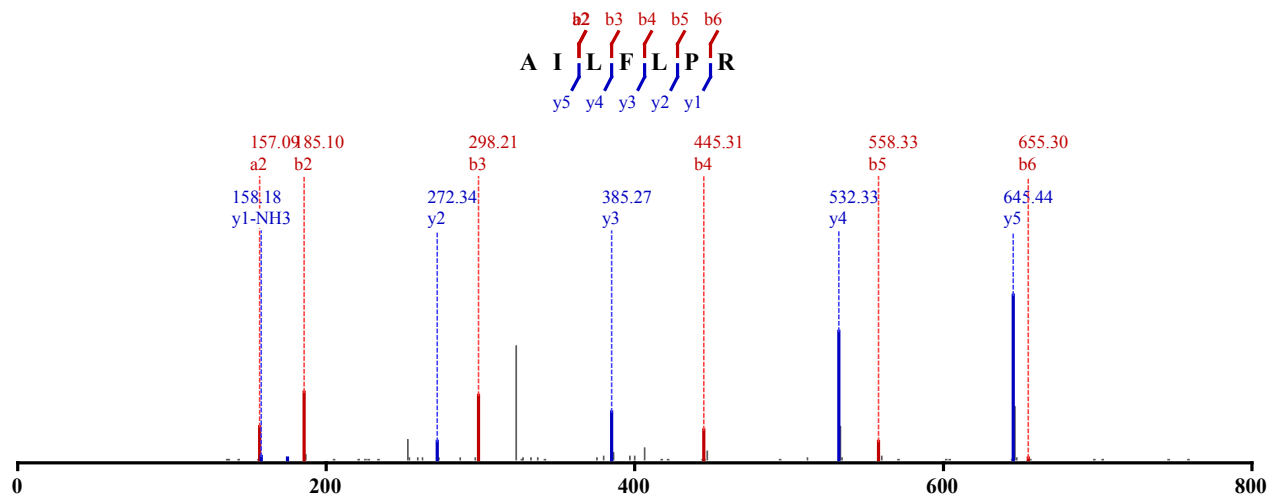

Not Modified  
 Identified in MSS488 with qvalue 0.00  
 Charge: 2, Exp. m/z: 415.268, Calc. m/z: 415.268  
 Data File: HeLa\_chy-try\_pH6\_CID\_3xload, Scans: 44106 - 44106

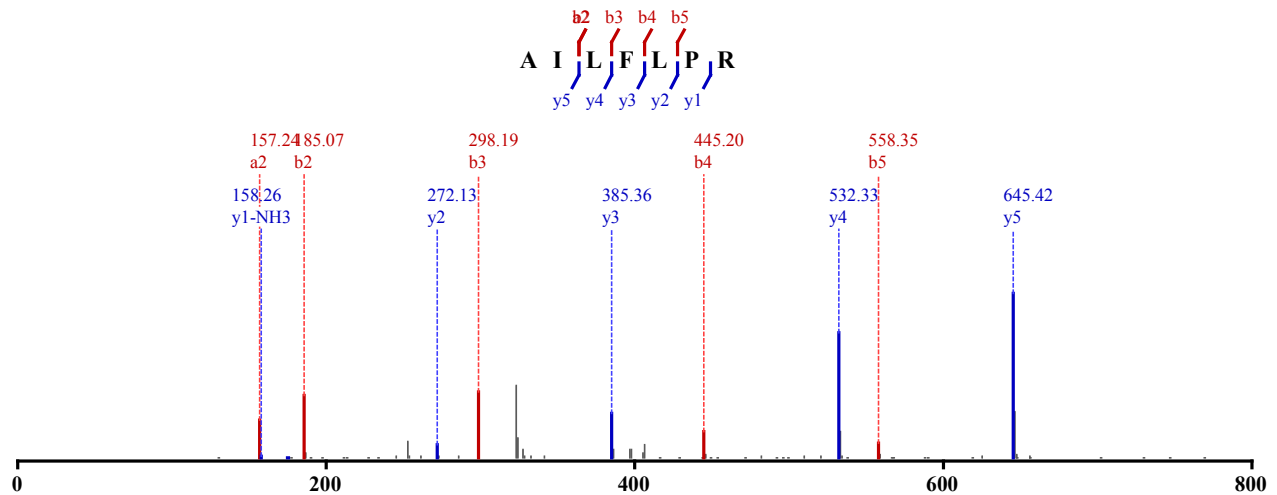

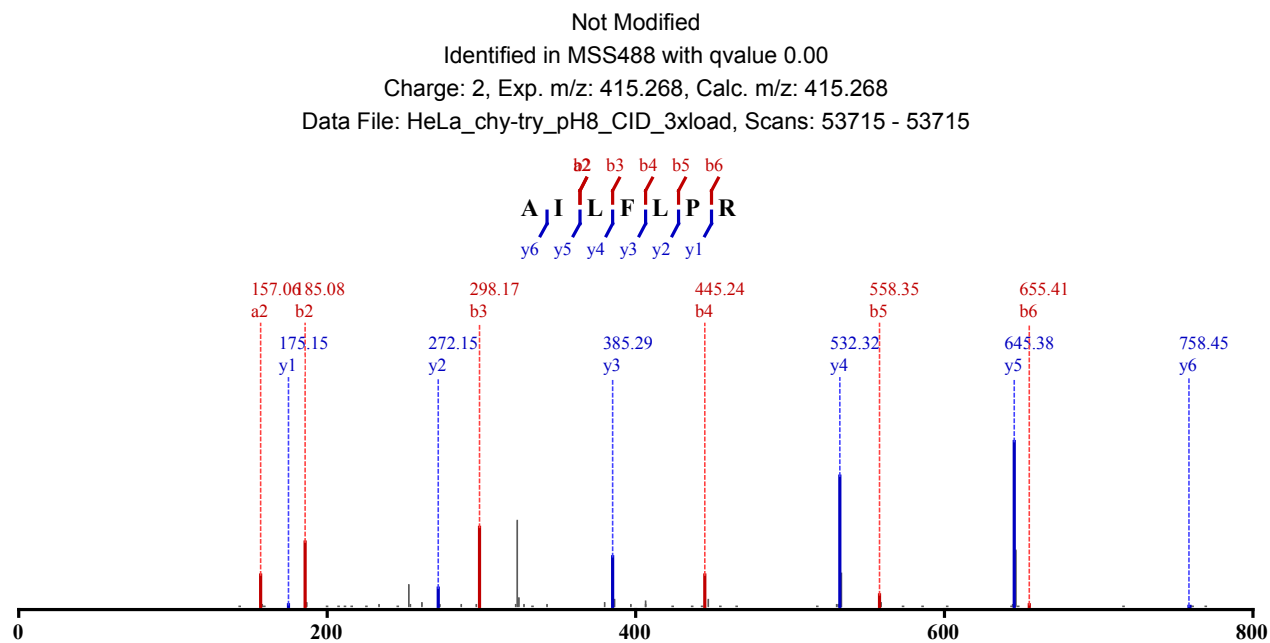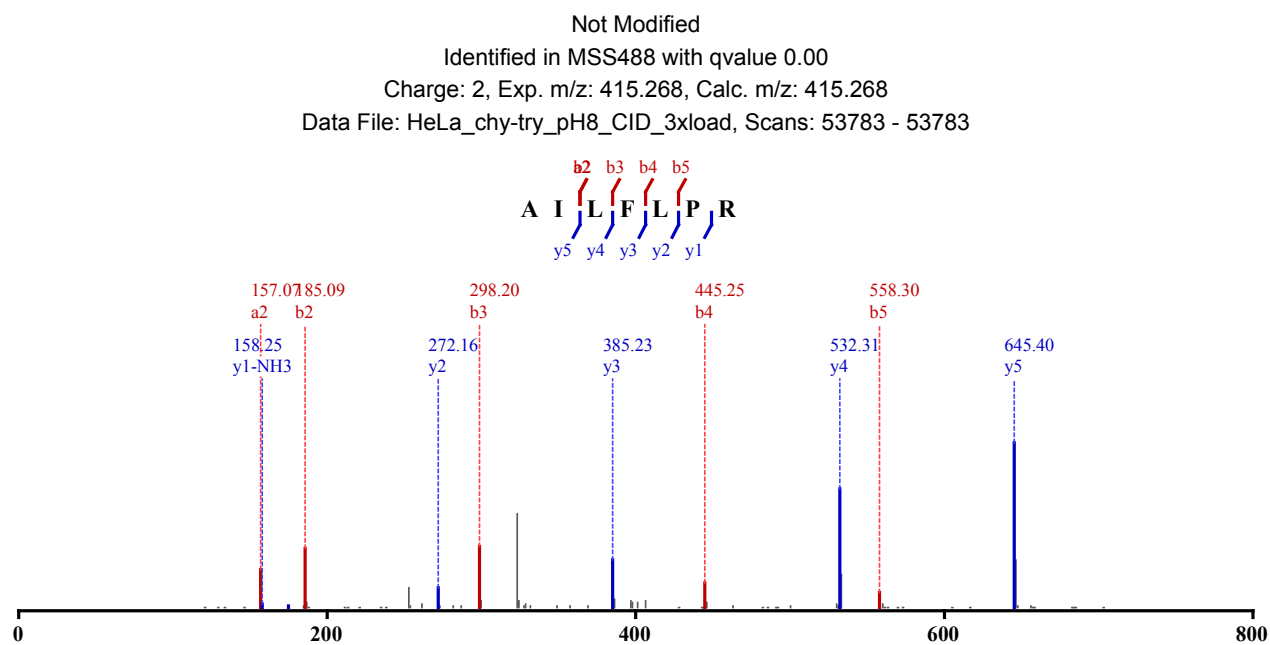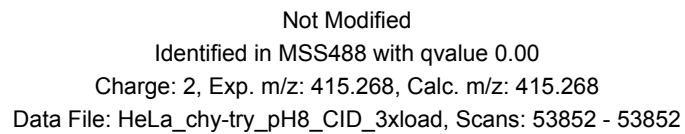

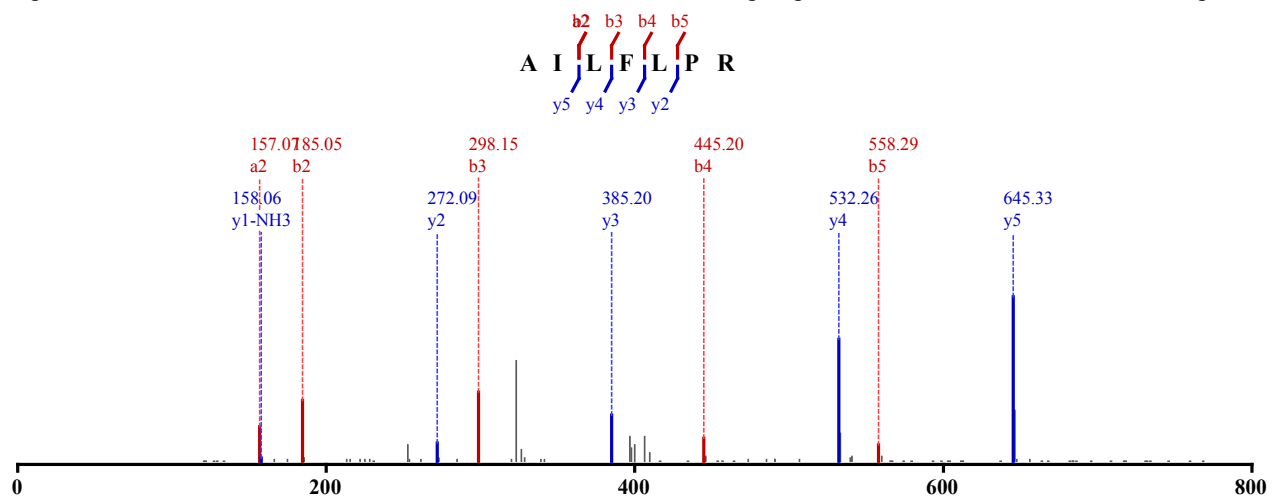

Not Modified

Identified in MSS488 with qvalue 0.00

Charge: 2, Exp. m/z: 415.268, Calc. m/z: 415.268

Data File: HeLa\_chy-try\_pH8\_CID\_3xload, Scans: 54055 - 54055

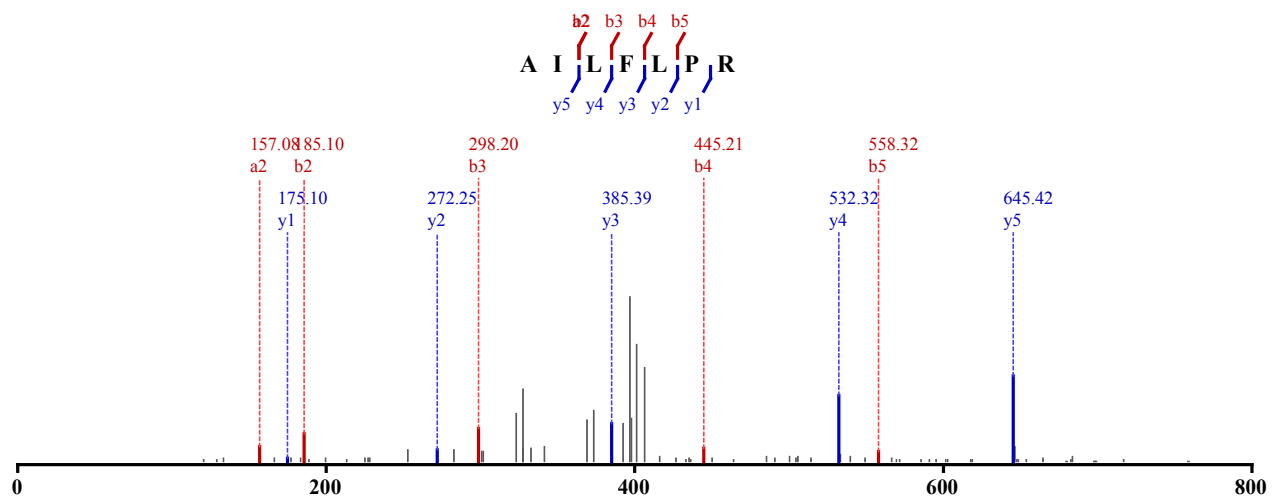

Not Modified

Identified in MSS488 with qvalue 0.00

Charge: 2, Exp. m/z: 415.268, Calc. m/z: 415.268

Data File: HeLa\_chy-try\_pH2\_CID\_3xload, Scans: 33494 - 33494

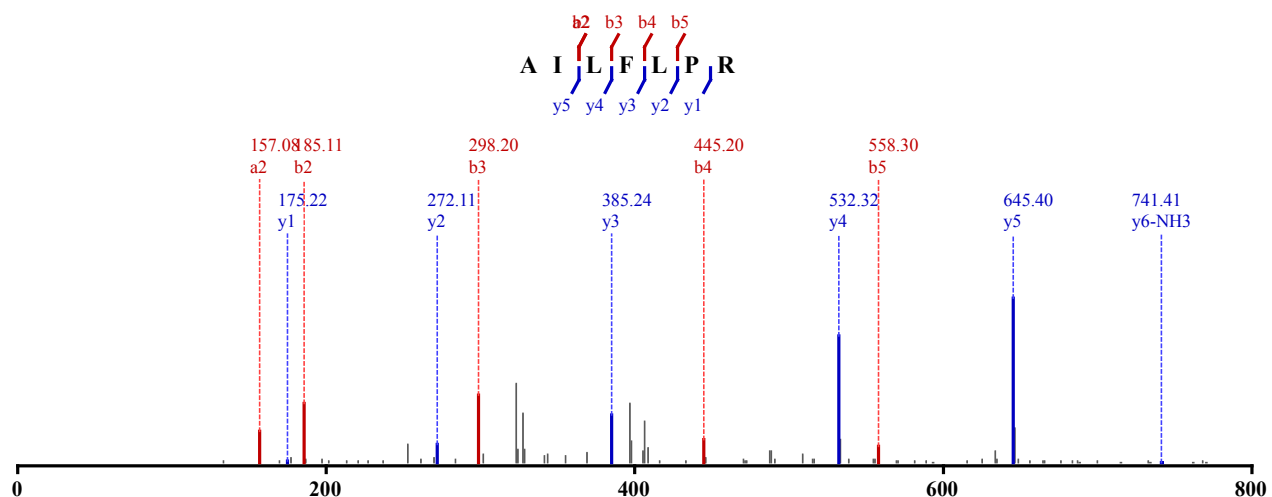

Not Modified

Identified in MSS488 with qvalue 0.00

Charge: 2, Exp. m/z: 415.268, Calc. m/z: 415.268



Data File: HeLa\_chy-try\_pH4\_CID\_3xload\_2, Scans: 32658 - 32658

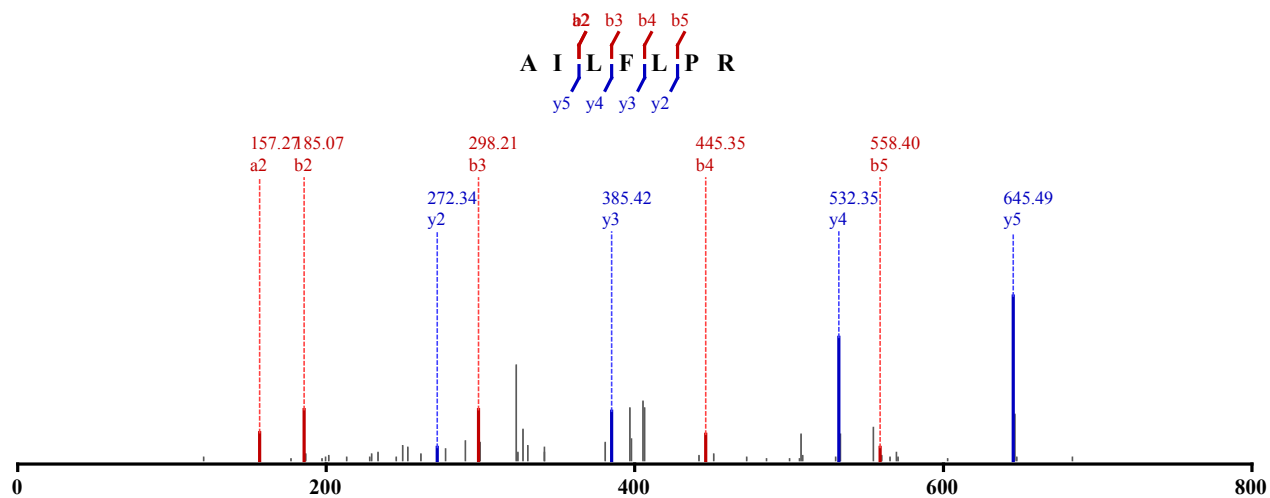

Not Modified

Identified in MSS488 with qvalue 0.00

Charge: 2, Exp. m/z: 415.268, Calc. m/z: 415.268

Data File: HeLa\_chy-try\_pH4\_CID\_3xload\_2, Scans: 32793 - 32793

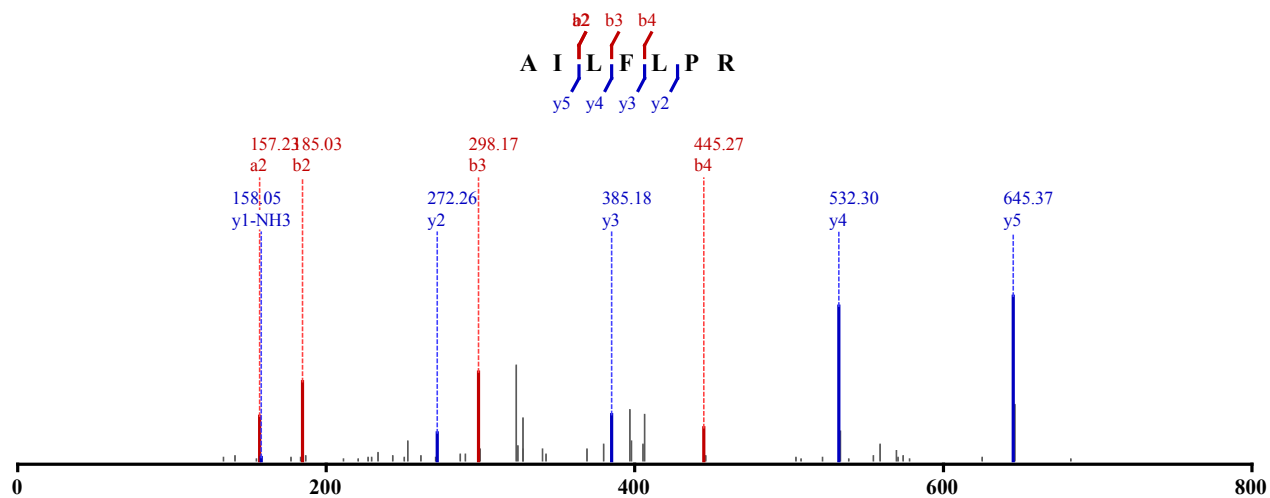

Not Modified

Identified in MSS488 with qvalue 0.00

Charge: 2, Exp. m/z: 415.268, Calc. m/z: 415.268

Data File: HeLa\_chy-try\_pH4\_CID\_3xload\_2, Scans: 32866 - 32866

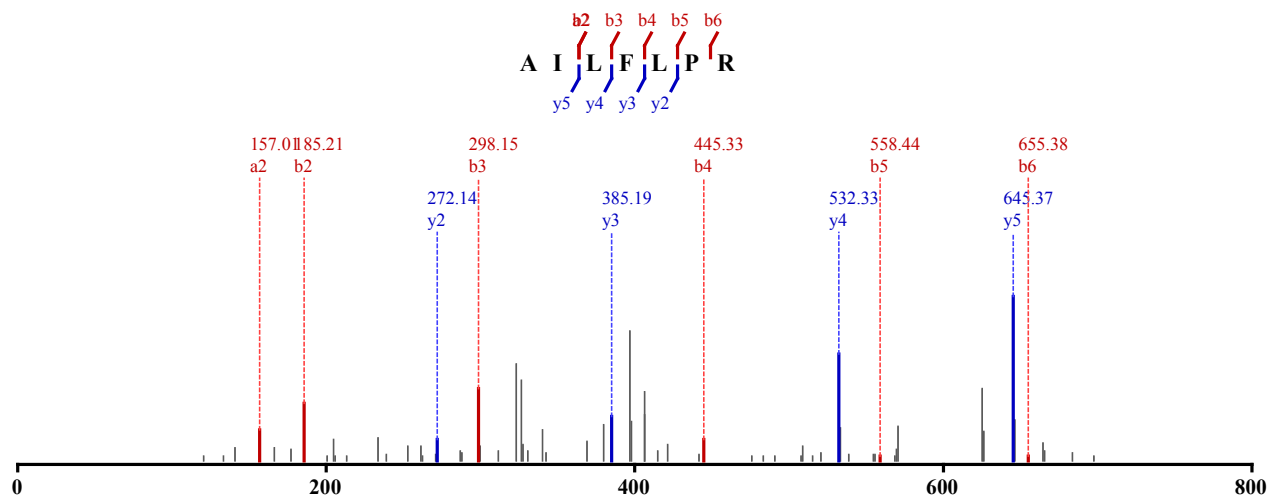

Not Modified

Identified in MSS488 with qvalue 0.00  
Charge: 2, Exp. m/z: 415.268, Calc. m/z: 415.268  
Data File: HeLa\_chy-try\_pH4\_CID\_3xload\_3, Scans: 31912 - 31912

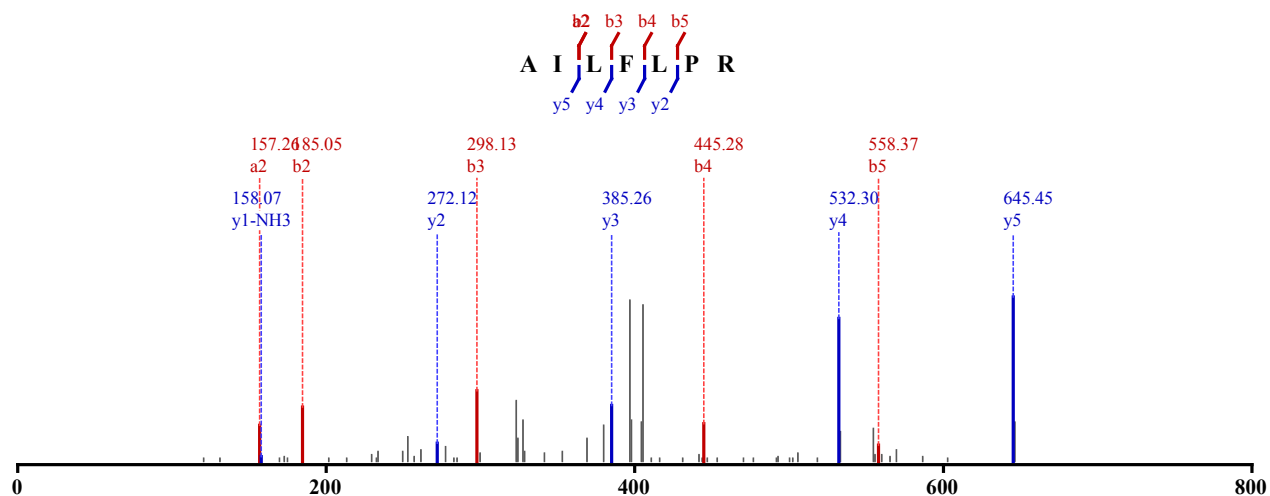

Not Modified  
Identified in MSS488 with qvalue 0.00  
Charge: 2, Exp. m/z: 415.268, Calc. m/z: 415.268  
Data File: HeLa\_chy-try\_pH5\_CID\_3xload\_2, Scans: 34485 - 34485

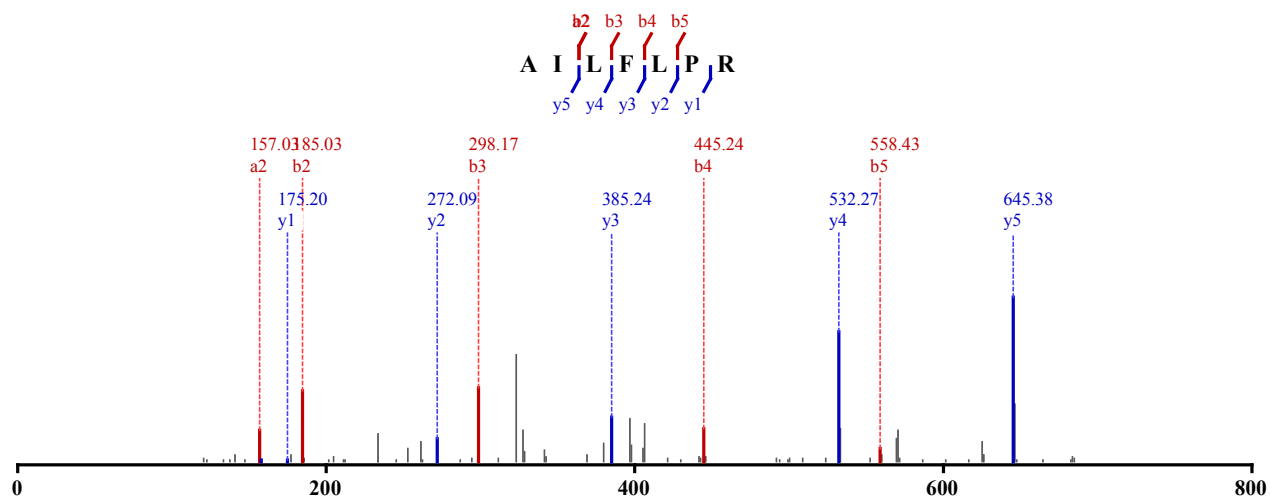

Not Modified  
Identified in MSS488 with qvalue 0.00  
Charge: 2, Exp. m/z: 415.268, Calc. m/z: 415.268  
Data File: HeLa\_chy-try\_pH5\_CID\_3xload\_2, Scans: 34553 - 34553

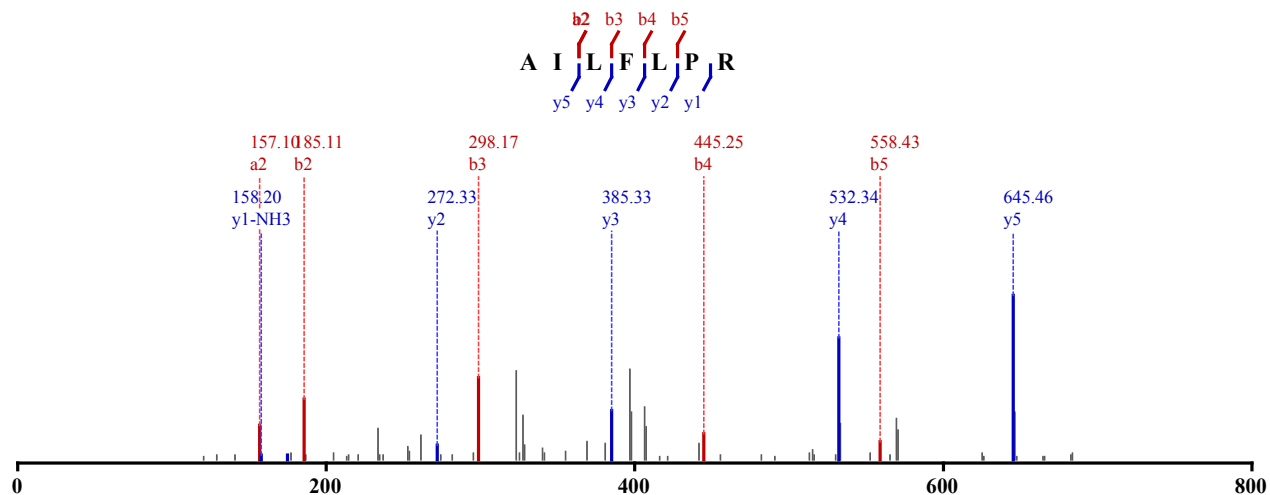

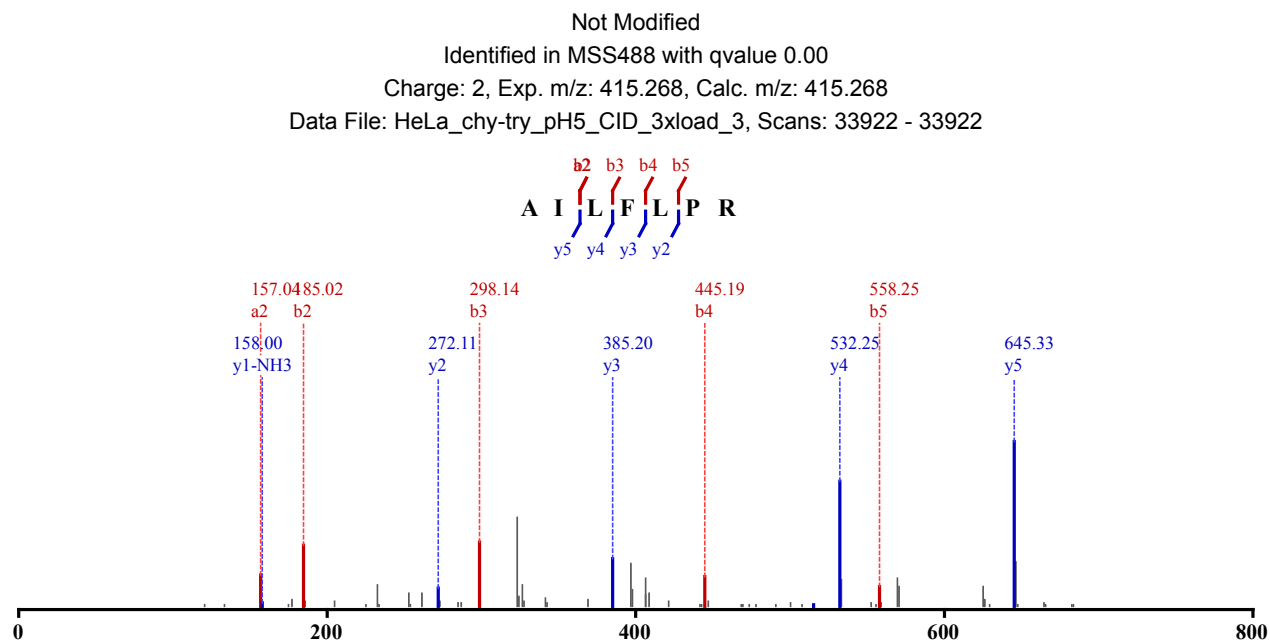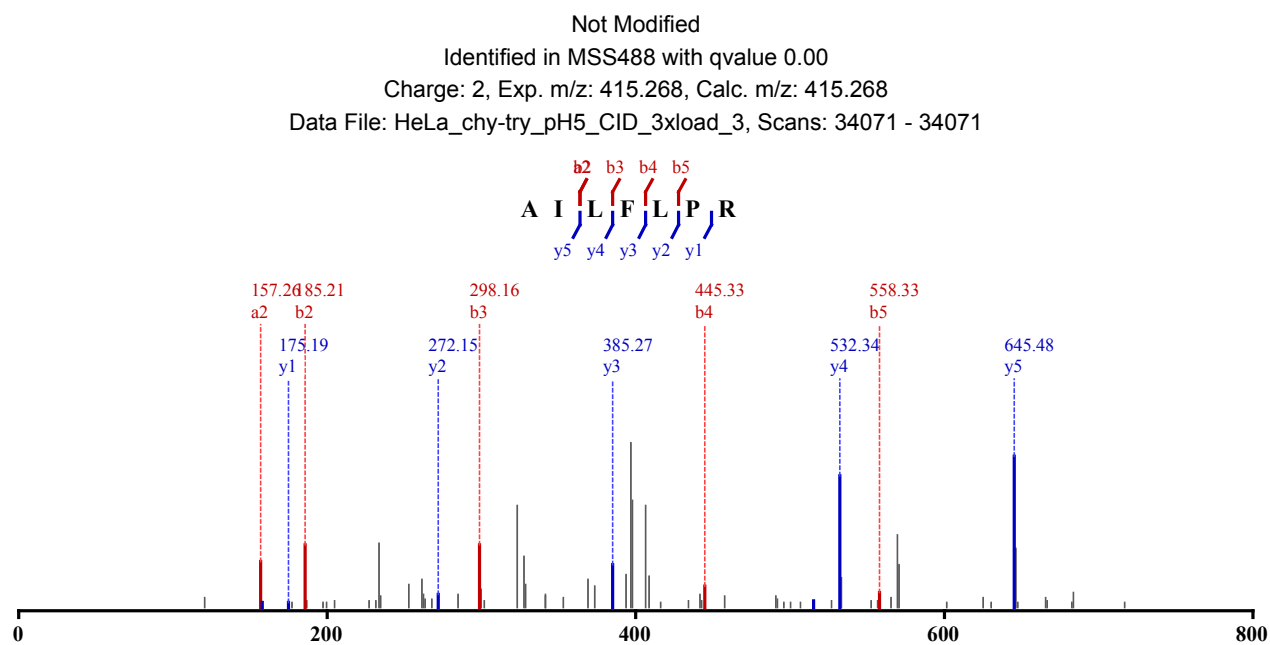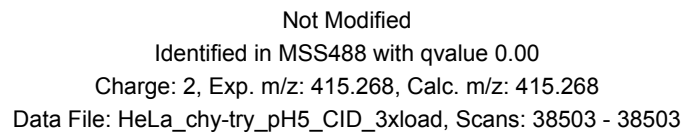

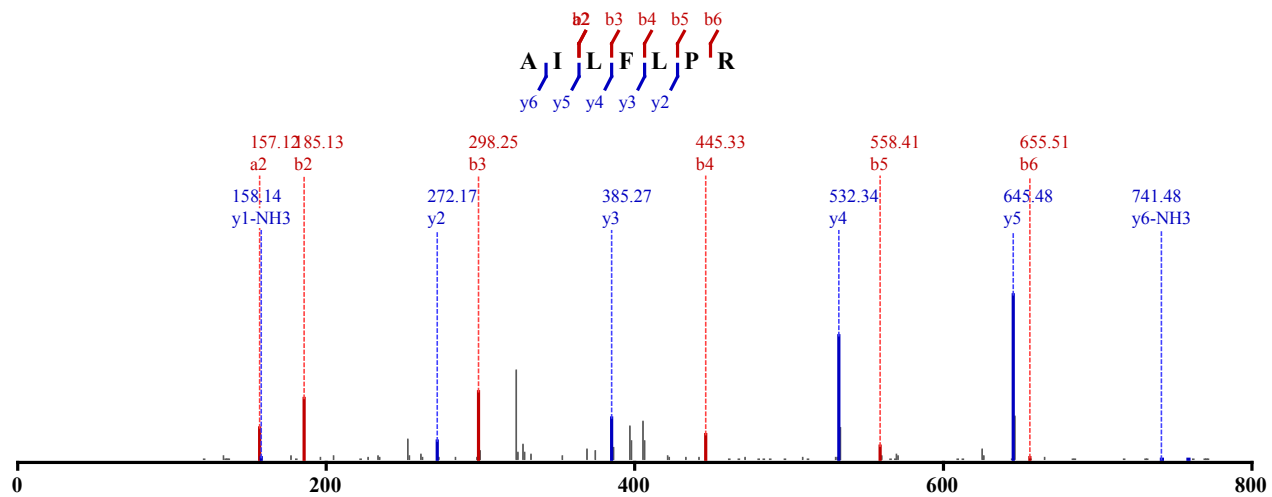

Not Modified

Identified in MSS488 with qvalue 0.00

Charge: 2, Exp. m/z: 415.268, Calc. m/z: 415.268

Data File: HeLa\_chy-try\_pH5\_CID\_3xload, Scans: 38595 - 38595

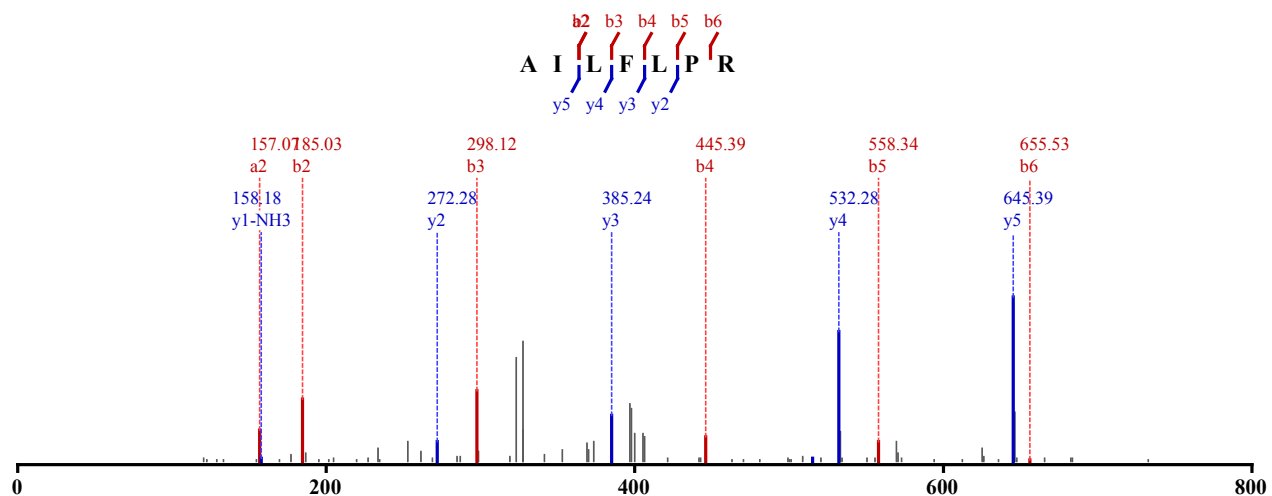

Not Modified

Identified in MSS488 with qvalue 0.00

Charge: 2, Exp. m/z: 415.268, Calc. m/z: 415.268

Data File: HeLa\_chy-try\_pH6\_CID\_3xload\_2, Scans: 40255 - 40255

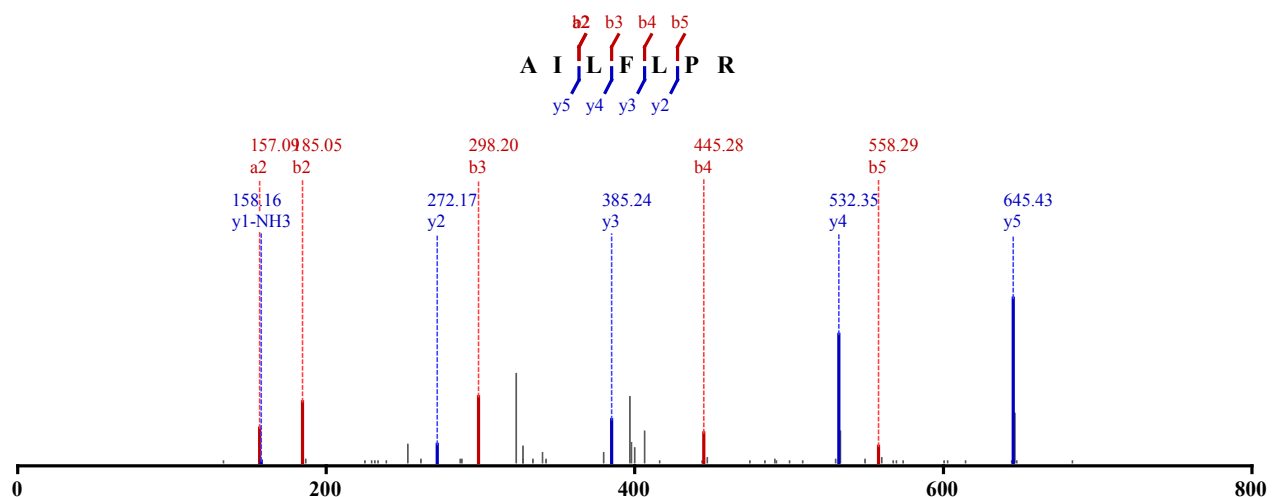

Not Modified

Identified in MSS488 with qvalue 0.00

Charge: 2, Exp. m/z: 415.268, Calc. m/z: 415.268

Data File: HeLa\_chy-try\_pH6\_CID\_3xload\_2, Scans: 40397 - 40397

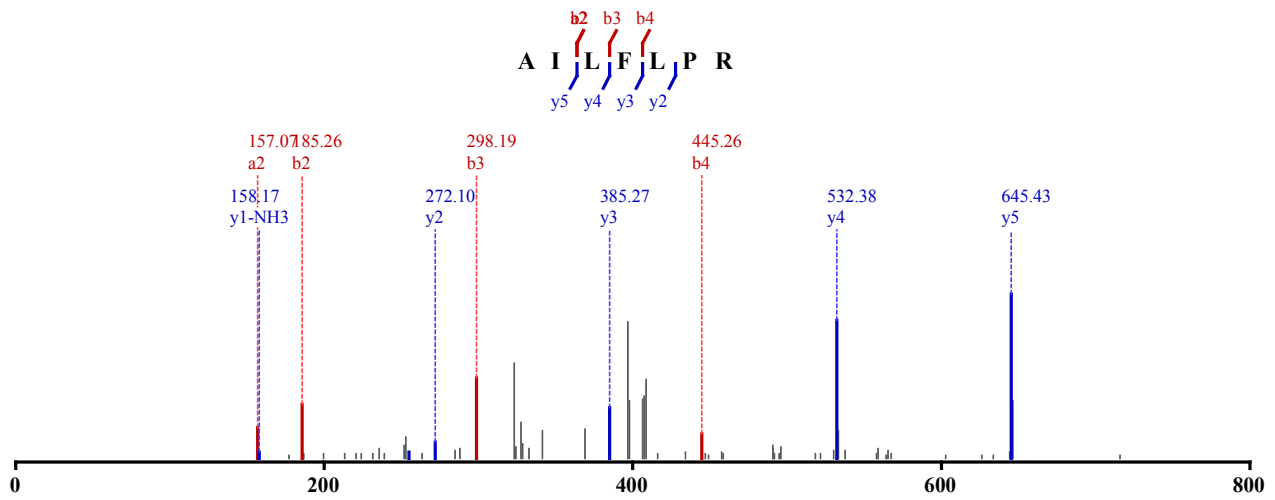

Not Modified

Identified in MSS488 with qvalue 0.00

Charge: 2, Exp. m/z: 415.268, Calc. m/z: 415.268

Data File: HeLa\_chy-try\_pH6\_CID\_3xload\_3, Scans: 38565 - 38565

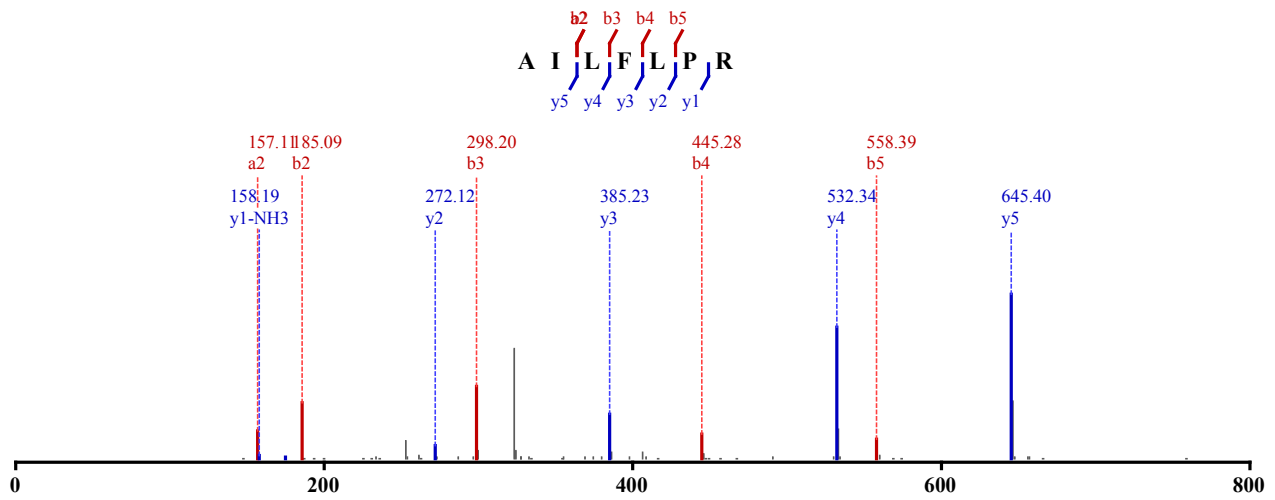

Not Modified

Identified in MSS488 with qvalue 0.00

Charge: 2, Exp. m/z: 415.268, Calc. m/z: 415.268

Data File: HeLa\_chy-try\_pH6\_CID\_3xload\_3, Scans: 38956 - 38956

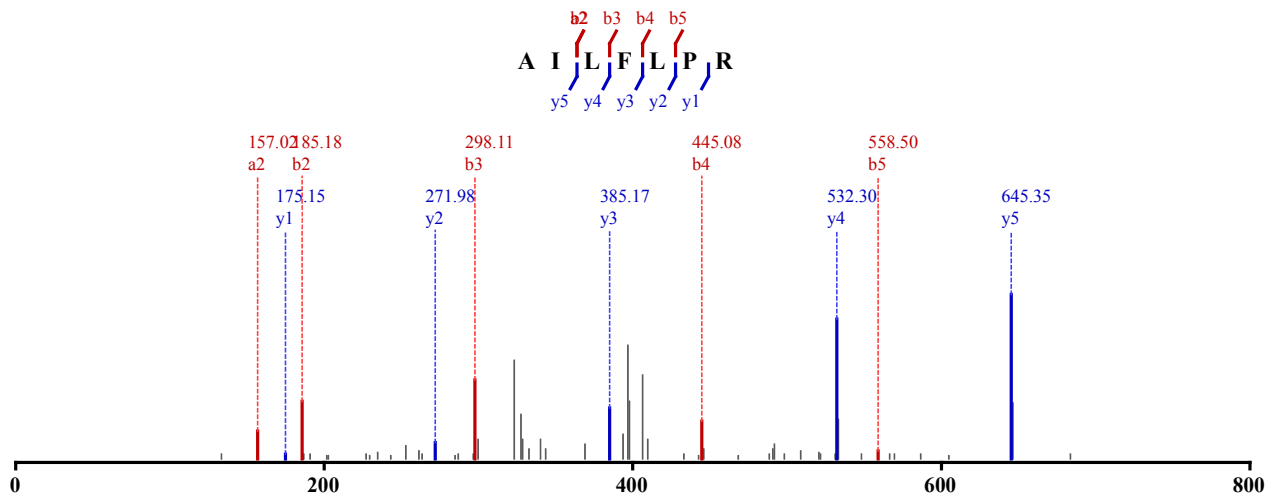

Not Modified

Identified in MSS488 with qvalue 0.00  
 Charge: 2, Exp. m/z: 415.268, Calc. m/z: 415.268  
 Data File: HeLa\_chy-try\_pH6\_CID\_3xload\_3, Scans: 39025 - 39025

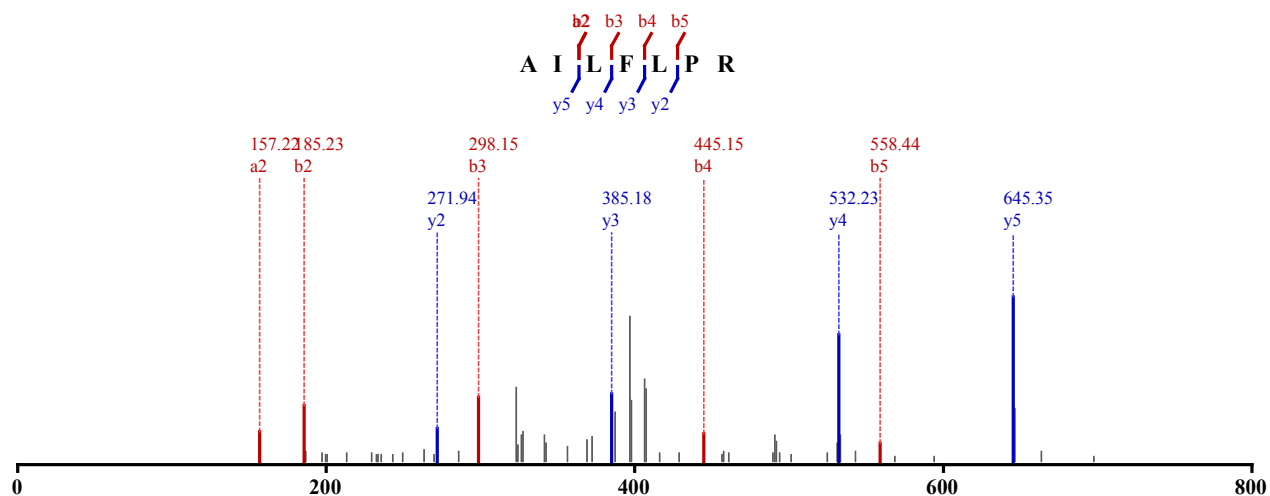

Not Modified  
 Identified in MSS488 with qvalue 0.00  
 Charge: 2, Exp. m/z: 415.268, Calc. m/z: 415.268  
 Data File: HeLa\_chy-try\_pH6\_CID\_3xload, Scans: 44166 - 44166

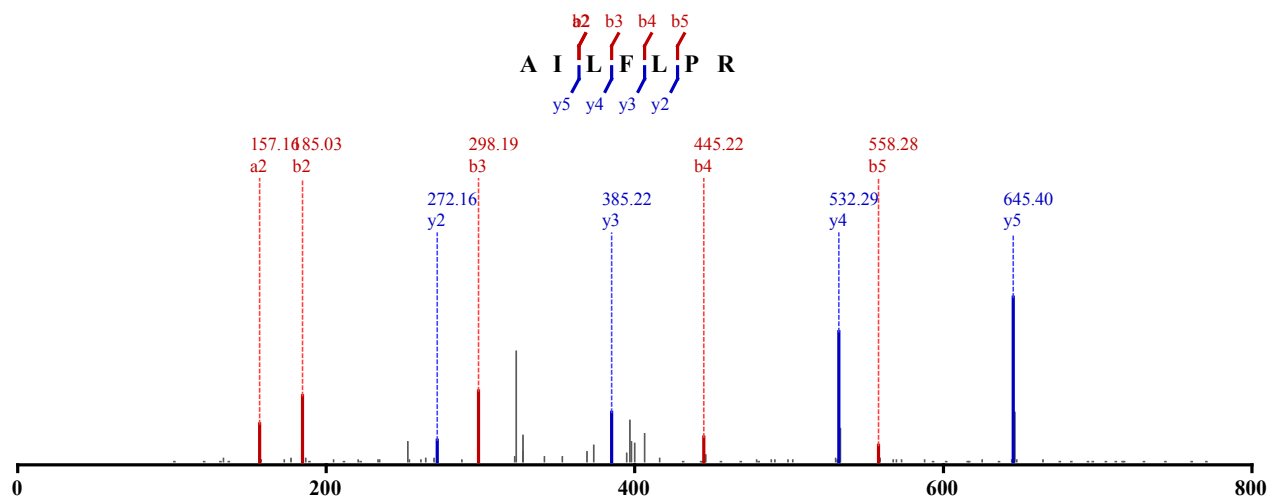

Not Modified  
 Identified in MSS488 with qvalue 0.00  
 Charge: 2, Exp. m/z: 415.268, Calc. m/z: 415.268  
 Data File: HeLa\_chy-try\_pH8\_CID\_3xload\_2, Scans: 27656 - 27656

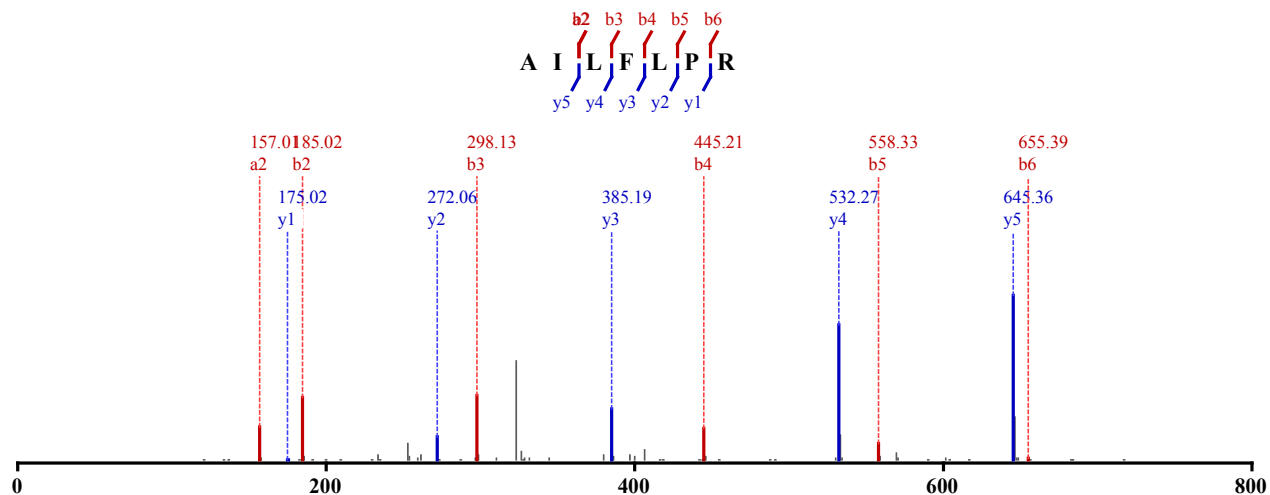

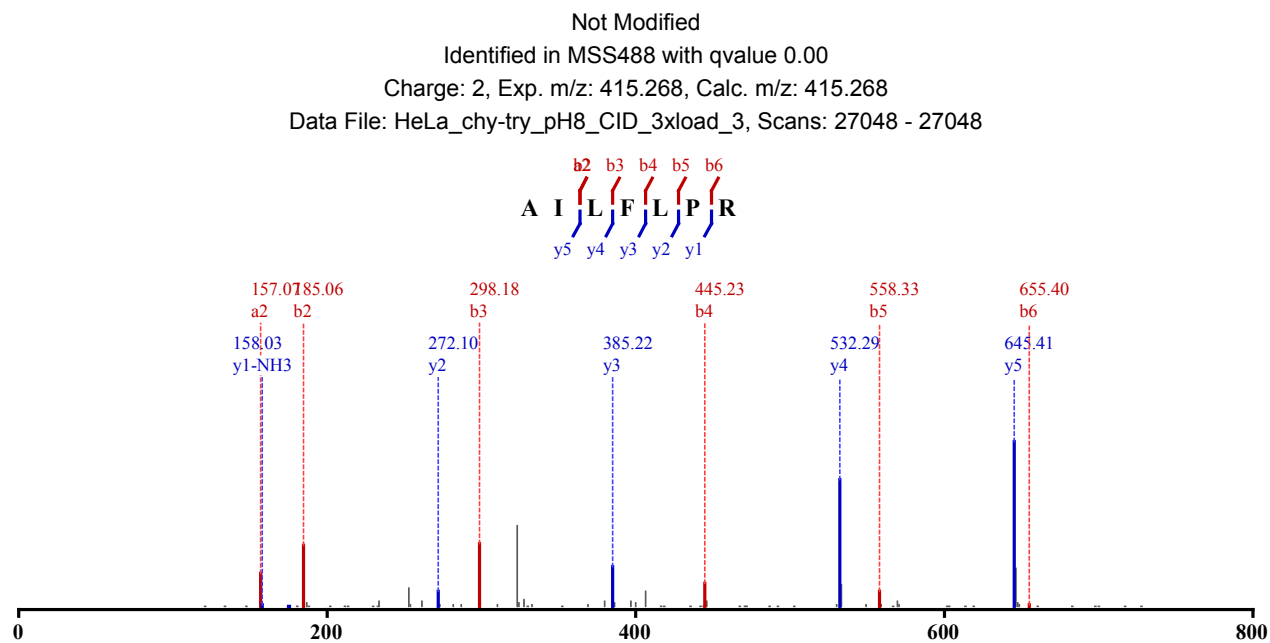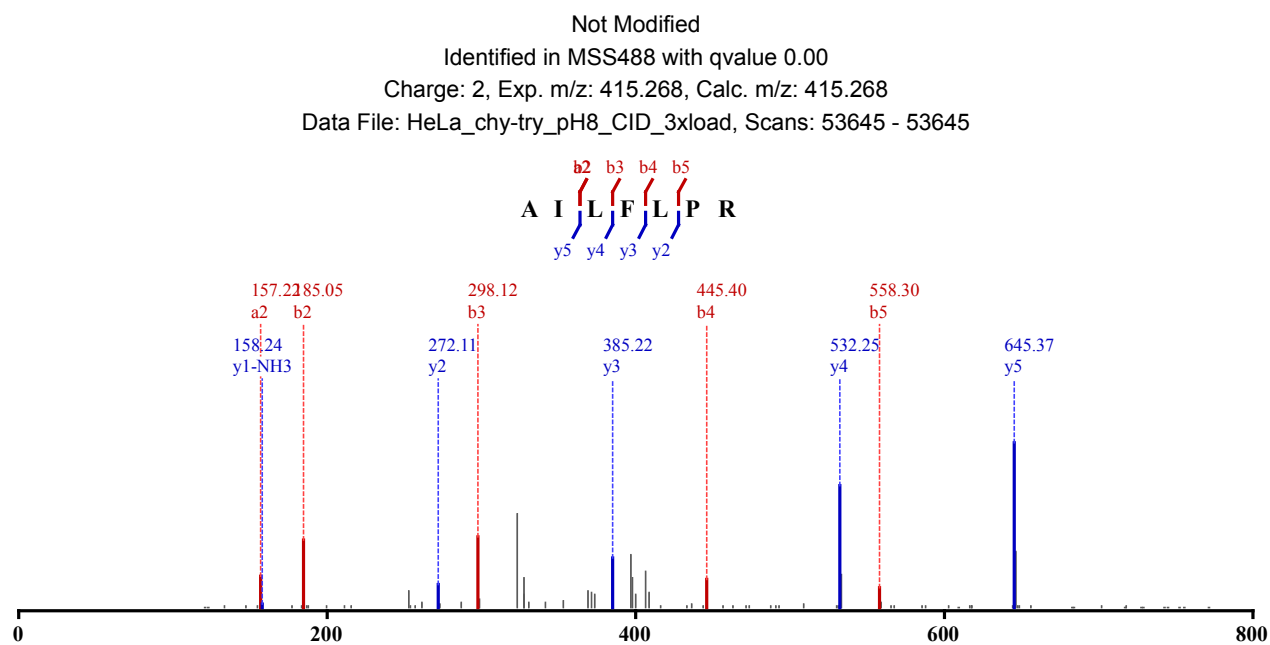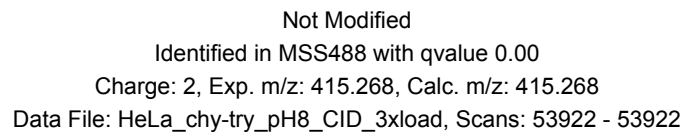

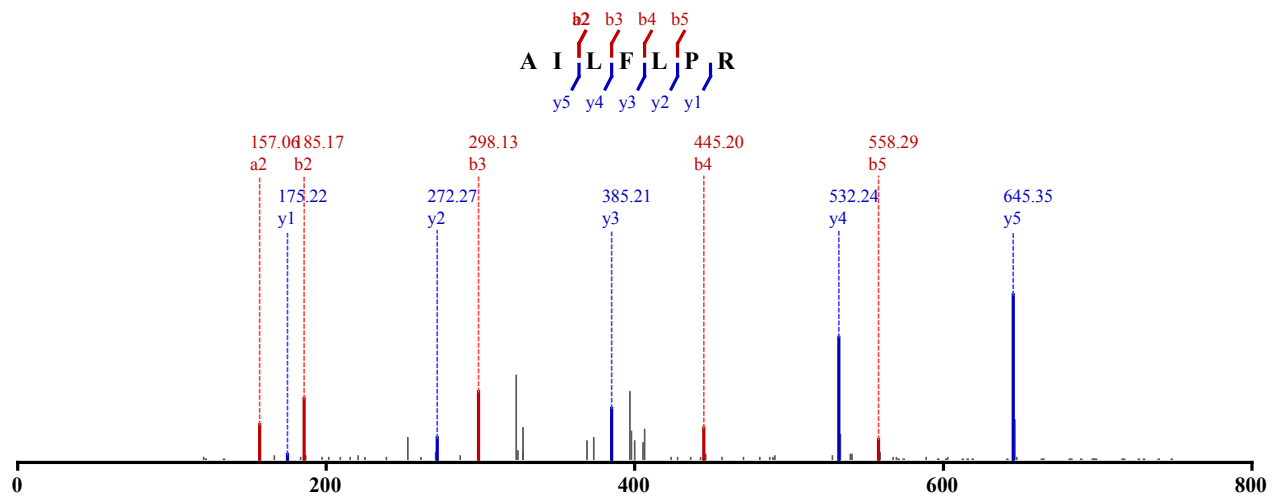

Not Modified  
 Identified in MSS479 with qvalue 0.00  
 Charge: 2, Exp. m/z: 527.780, Calc. m/z: 527.782  
 Data File: HeLa\_AspN\_pH11\_HCD\_2, Scans: 27624 - 27624

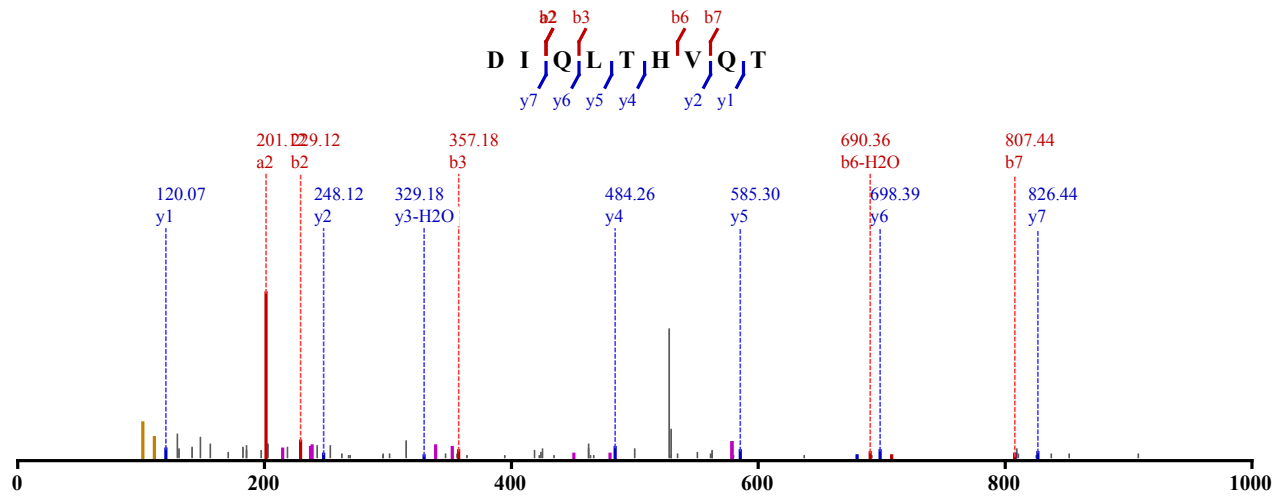

Not Modified  
 Identified in MSS479 with qvalue 0.00  
 Charge: 2, Exp. m/z: 527.780, Calc. m/z: 527.782  
 Data File: HeLa\_AspN\_pH11\_HCD\_1, Scans: 28966 - 28966

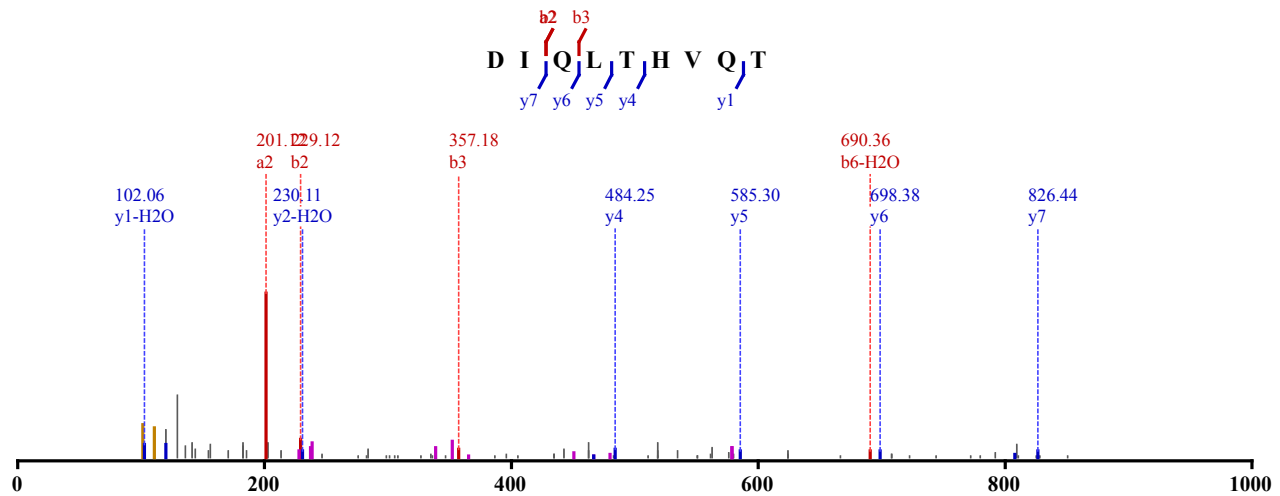

Not Modified  
 Identified in MSS483 with qvalue 0.00  
 Charge: 2, Exp. m/z: 527.779, Calc. m/z: 527.782



Data File: HeLa\_AspN\_pH11\_CID\_3xload, Scans: 22401 - 22401

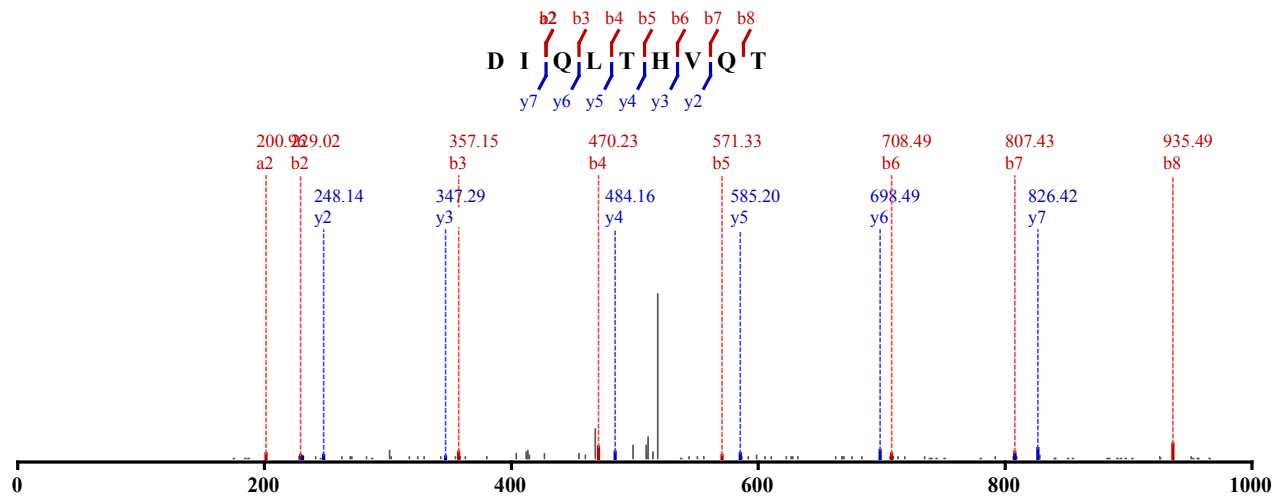

Not Modified

Identified in MSS480 with qvalue 0.00

Charge: 4, Exp. m/z: 701.560, Calc. m/z: 701.057

Data File: HeLa\_try\_pH2\_CID\_3xload\_2, Scans: 15379 - 15379

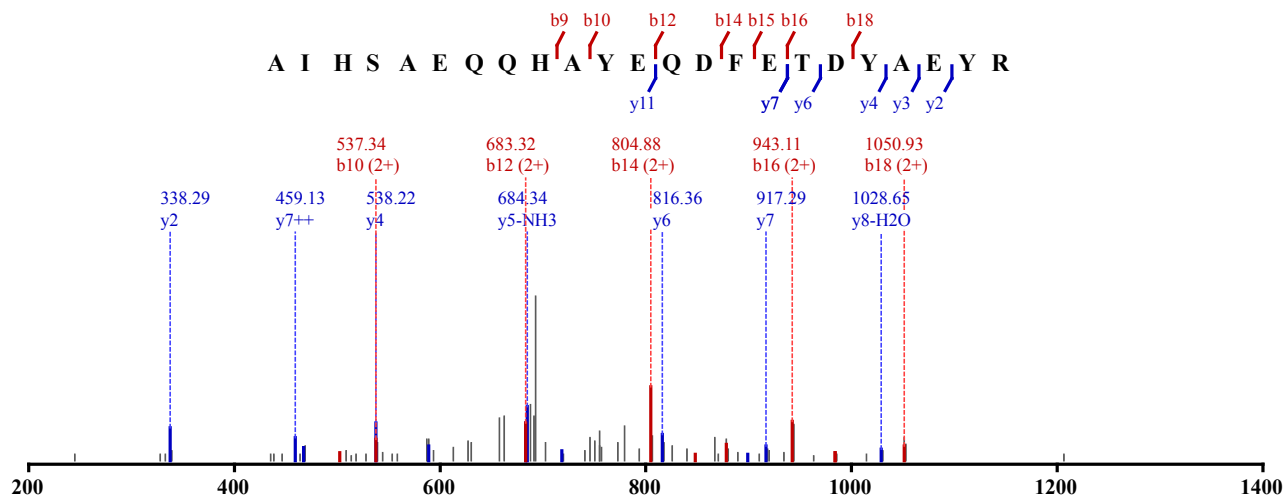

Not Modified

Identified in MSS480 with qvalue 0.00

Charge: 4, Exp. m/z: 701.057, Calc. m/z: 701.057

Data File: HeLa\_try\_pH2\_CID\_3xload, Scans: 14727 - 14727

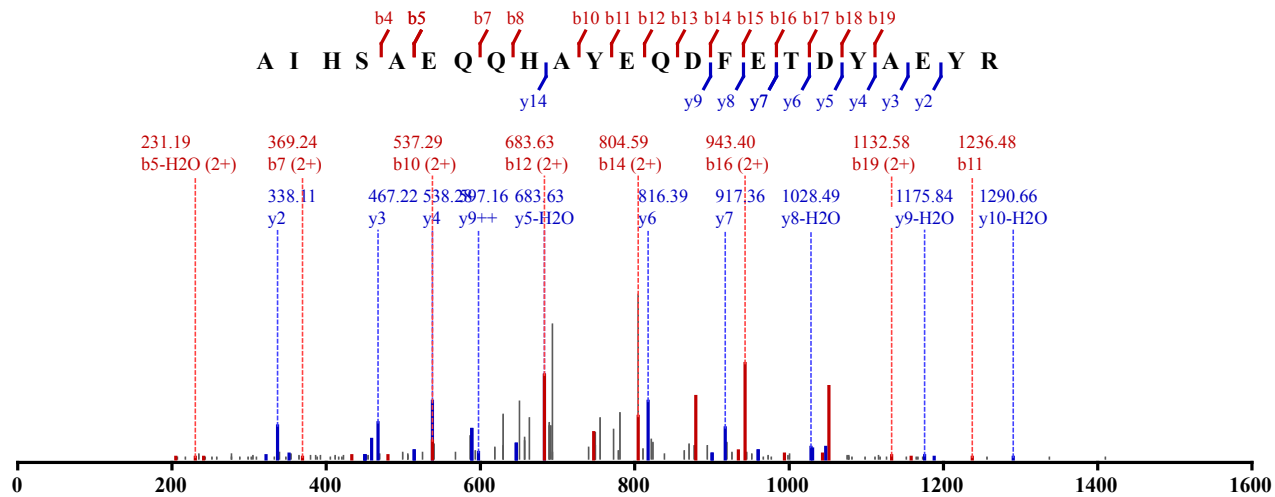

Not Modified

Identified in MSS77 with qvalue 0.01  
 Charge: 2, Exp. m/z: 965.982, Calc. m/z: 965.982  
 Data File: HeLa\_AspN-GluC\_CID\_3, Scans: 51274 - 51274

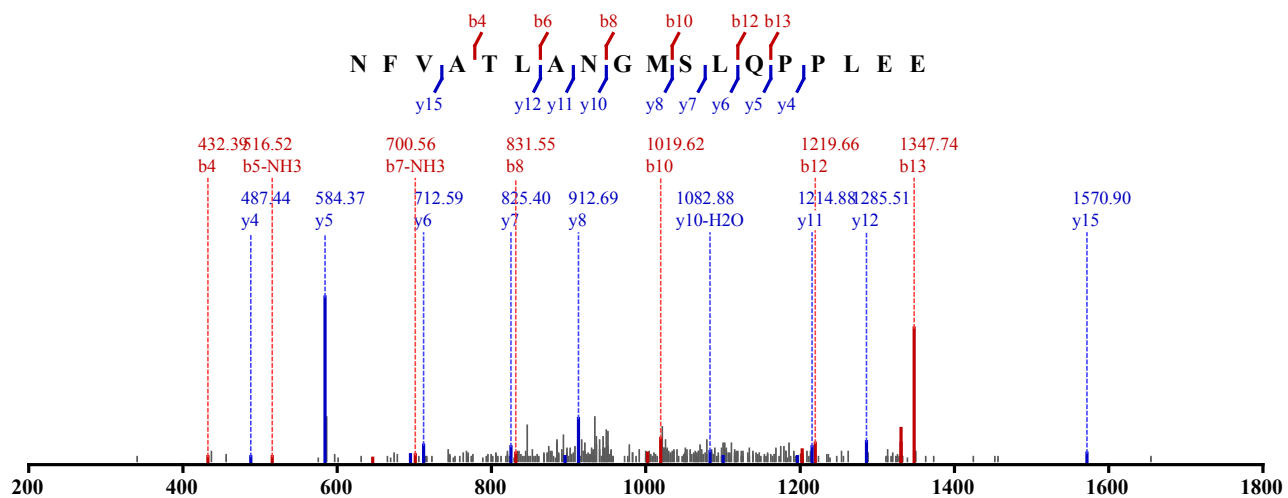

Not Modified  
 Identified in MSS77 with qvalue 0.00  
 Charge: 2, Exp. m/z: 966.487, Calc. m/z: 965.982  
 Data File: HeLa\_AspN-GluC\_CID\_2, Scans: 51440 - 51440

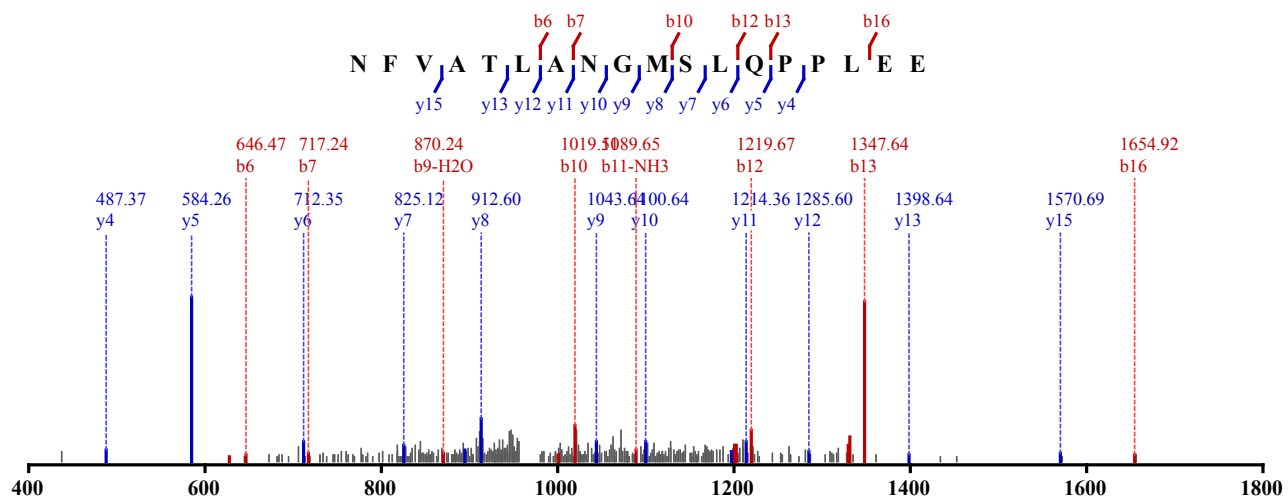

Not Modified  
 Identified in MSS115 with qvalue 0.00  
 Charge: 2, Exp. m/z: 965.982, Calc. m/z: 965.982  
 Data File: HeLa\_GluC\_CID\_2, Scans: 44354 - 44354

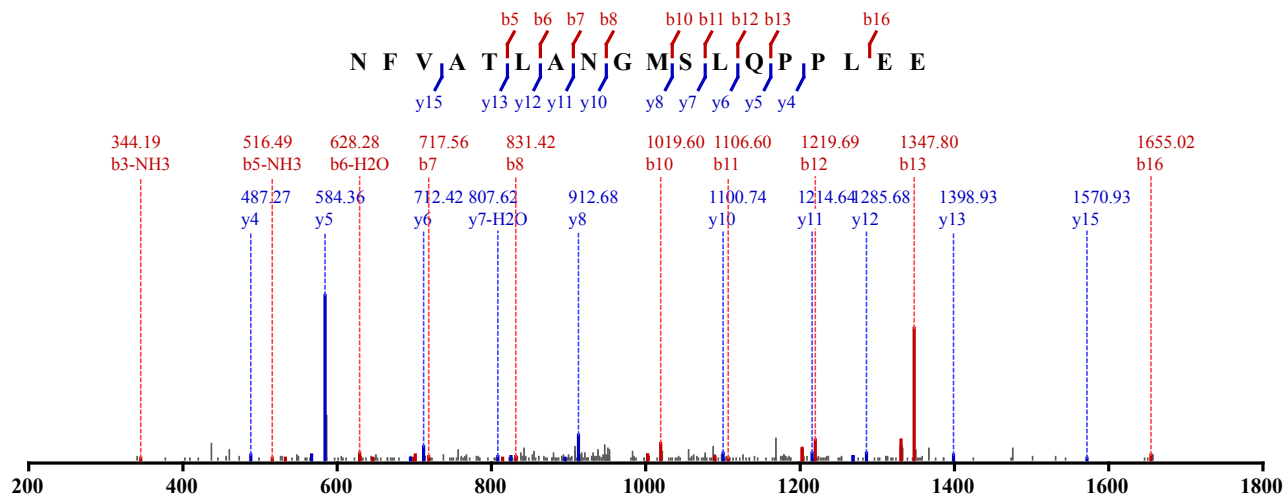

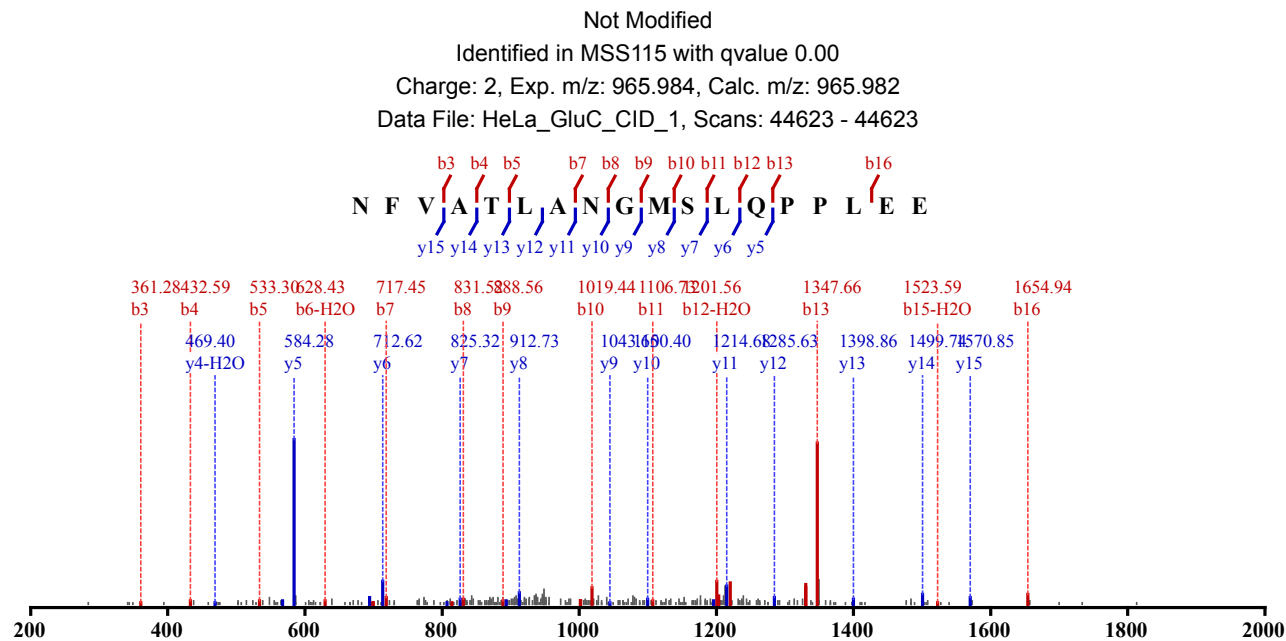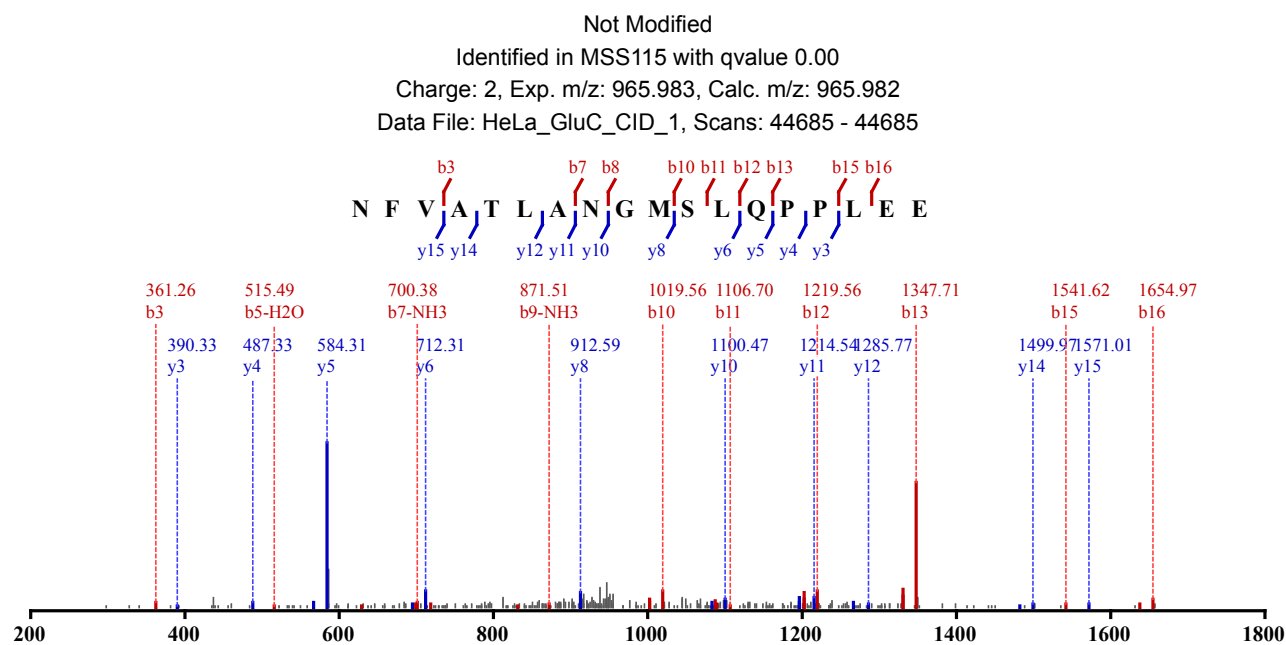

Not Modified  
 Identified in MSS115 with qvalue 0.00  
 Charge: 2, Exp. m/z: 965.983, Calc. m/z: 965.982  
 Data File: HeLa\_GluC\_CID\_2, Scans: 44293 - 44293

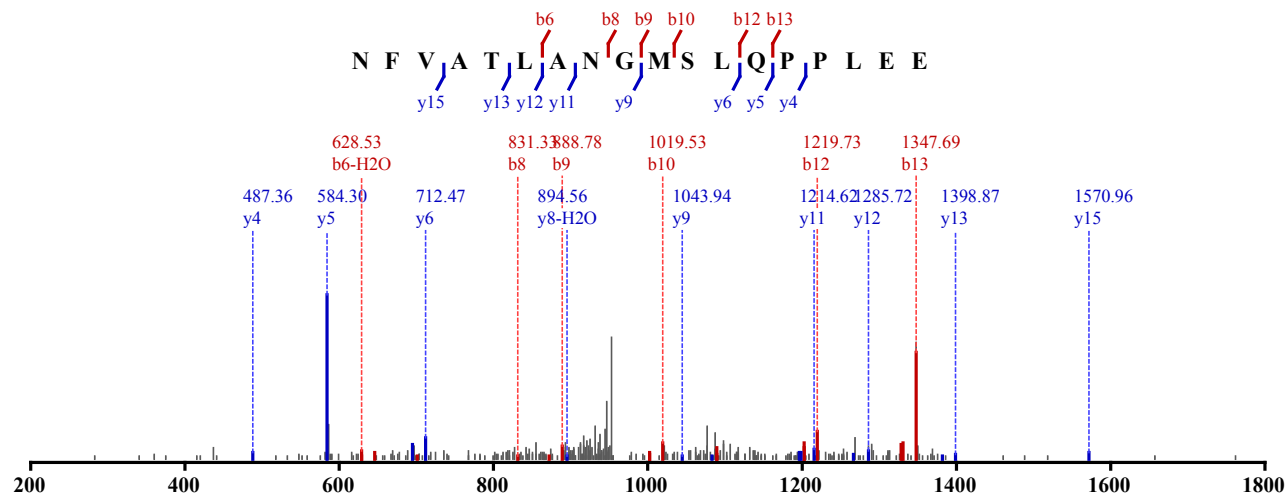

Not Modified

Identified in MSS115 with qvalue 0.00

Charge: 2, Exp. m/z: 965.982, Calc. m/z: 965.982

Data File: HeLa\_GluC\_CID\_3, Scans: 44570 - 44570

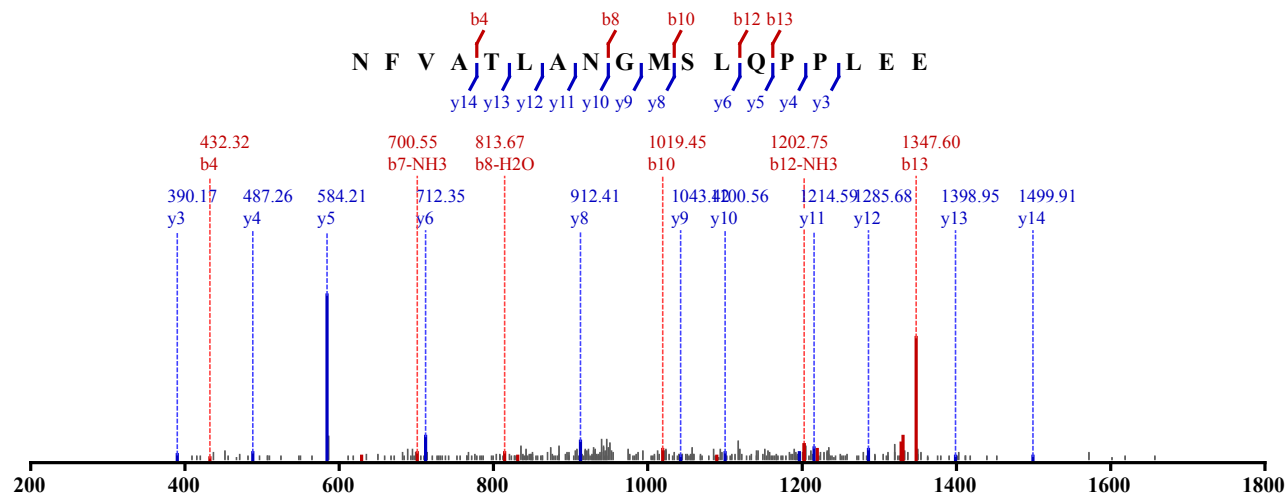

Not Modified

Identified in MSS119 with qvalue 0.00

Charge: 2, Exp. m/z: 965.985, Calc. m/z: 965.982

Data File: HeLa\_GluC\_HCD\_1, Scans: 35769 - 35769

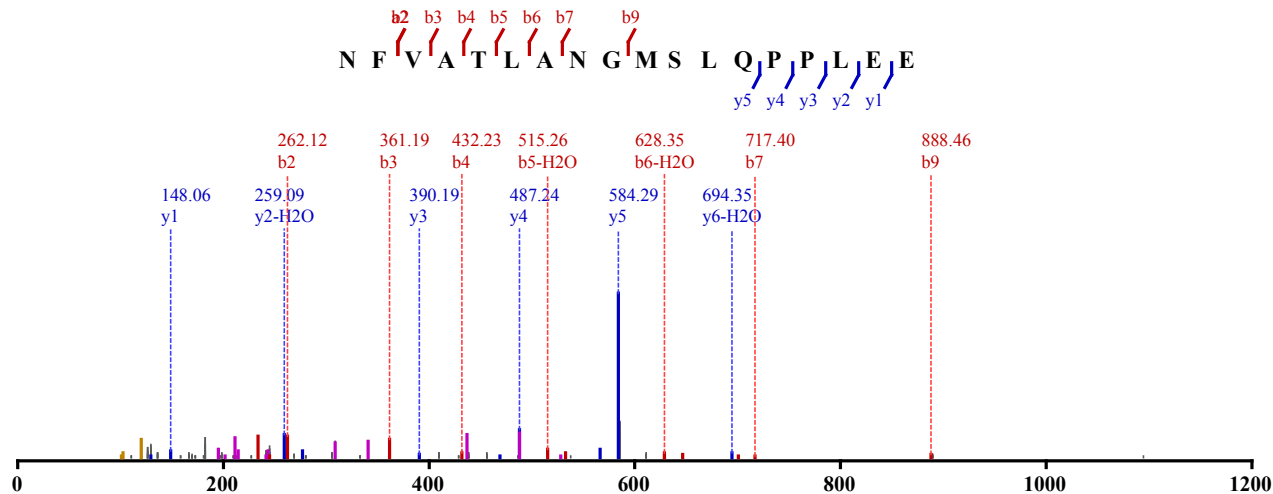

Not Modified

Identified in MSS119 with qvalue 0.01

Charge: 2, Exp. m/z: 965.979, Calc. m/z: 965.982

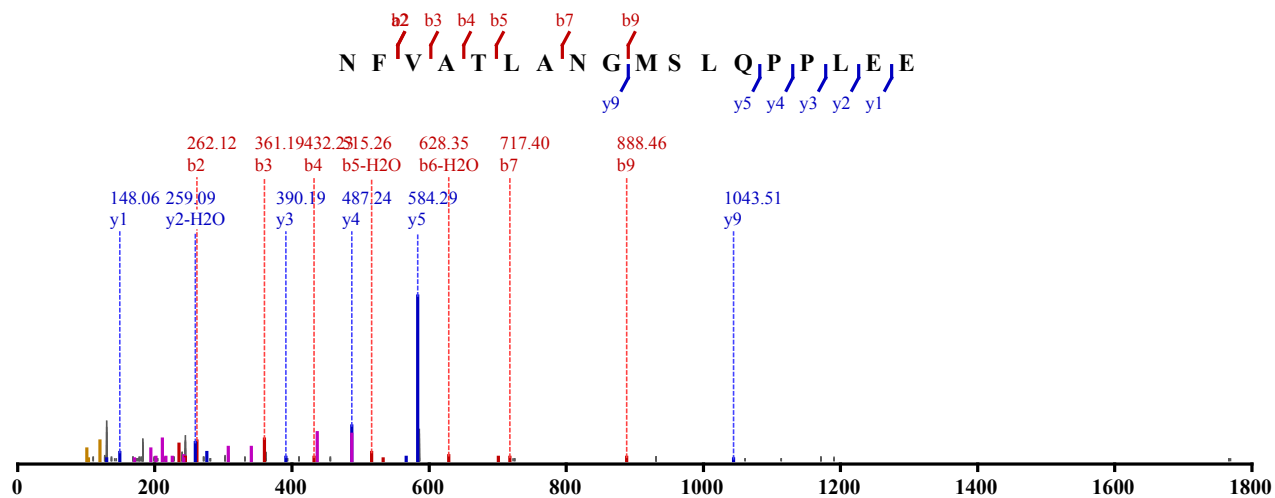

Not Modified

Identified in MSS237 with qvalue 0.00

Charge: 2, Exp. m/z: 965.983, Calc. m/z: 965.982

Data File: HeLa\_GluC\_CID-ETD\_1, Scans: 27956 - 27956

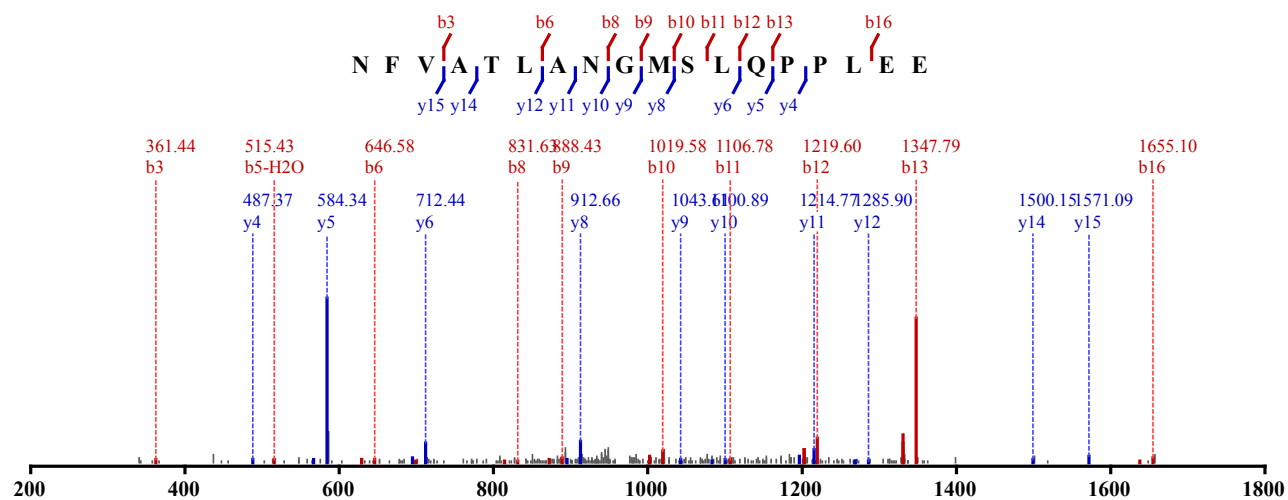

Not Modified

Identified in MSS237 with qvalue 0.00

Charge: 2, Exp. m/z: 965.985, Calc. m/z: 965.982

Data File: HeLa\_GluC\_CID-ETD\_3, Scans: 26576 - 26576

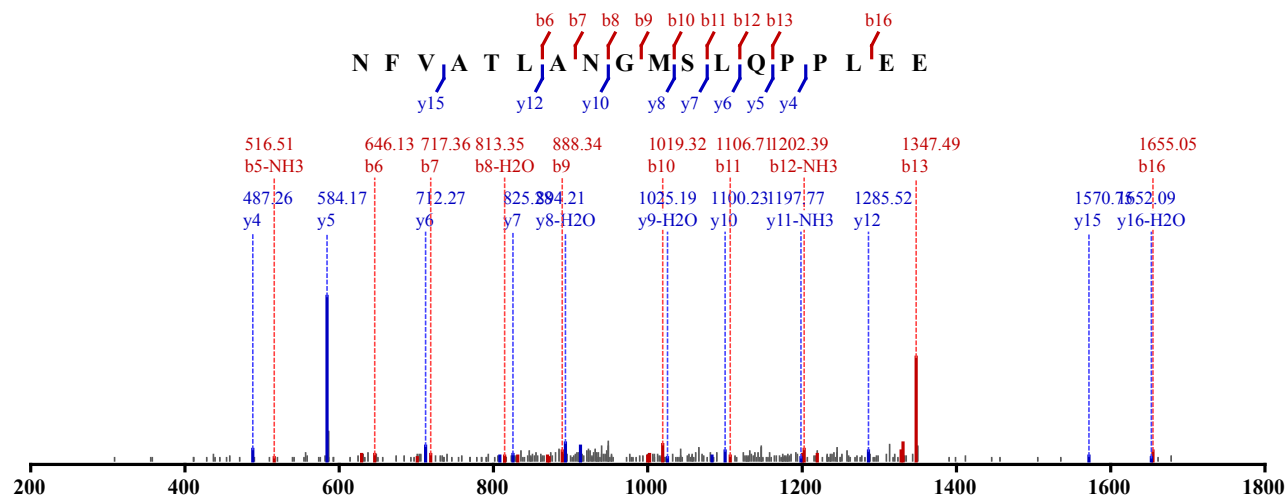

Not Modified

Identified in MSS237 with qvalue 0.00  
 Charge: 2, Exp. m/z: 965.984, Calc. m/z: 965.982  
 Data File: HeLa\_GluC\_CID-ETD\_1, Scans: 27905 - 27905

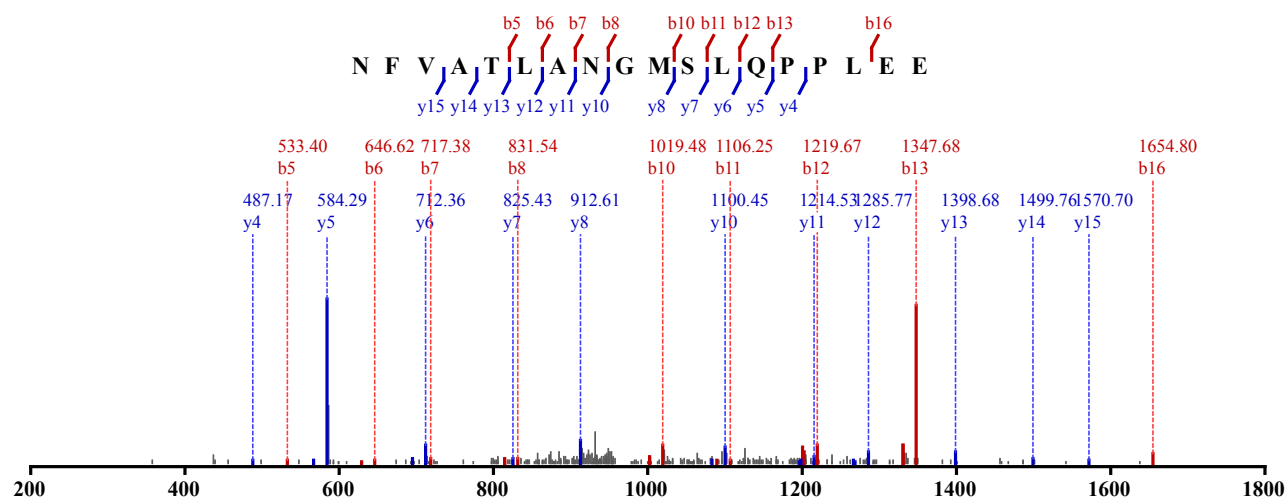

Not Modified  
 Identified in MSS237 with qvalue 0.00  
 Charge: 2, Exp. m/z: 965.983, Calc. m/z: 965.982  
 Data File: HeLa\_GluC\_CID-ETD\_2, Scans: 25538 - 25538

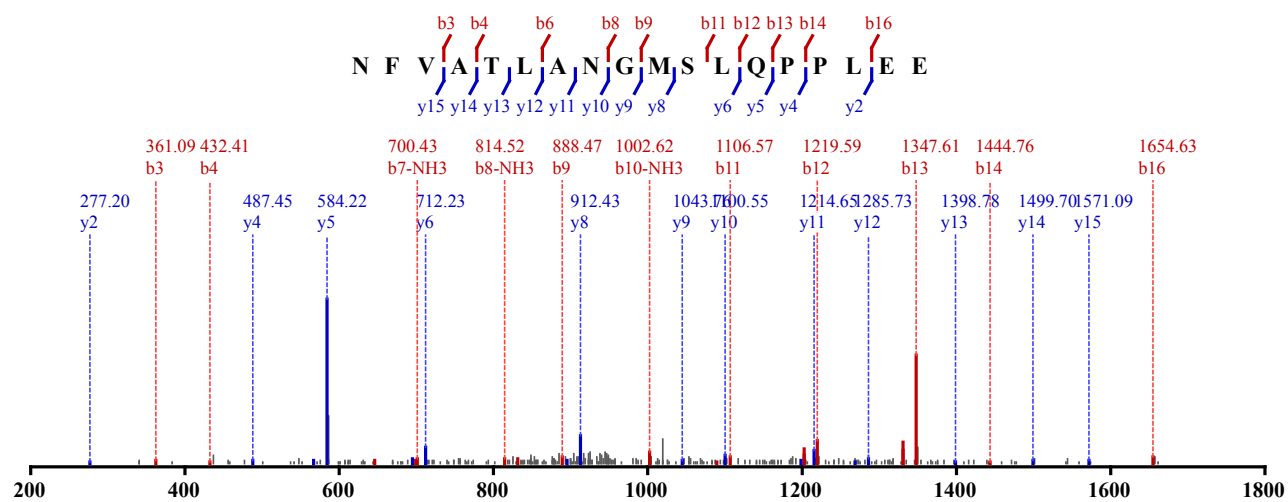

Not Modified  
 Identified in MSS237 with qvalue 0.00  
 Charge: 2, Exp. m/z: 965.985, Calc. m/z: 965.982  
 Data File: HeLa\_GluC\_CID-ETD\_3, Scans: 26510 - 26510

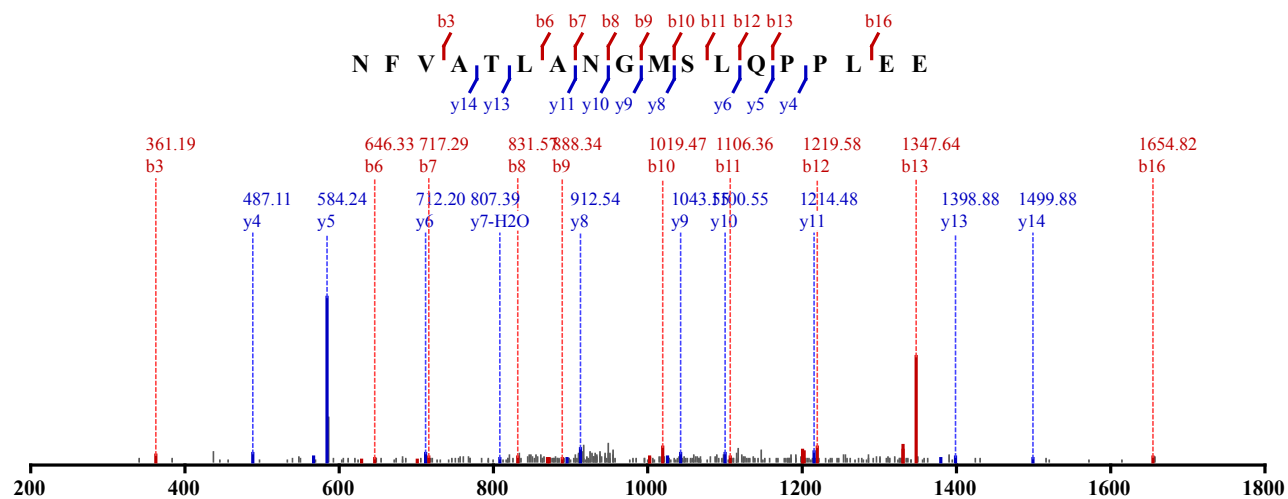

Not Modified  
 Identified in MSS430 with qvalue 0.01  
 Charge: 2, Exp. m/z: 965.982, Calc. m/z: 965.982  
 Data File: HeLa\_GluC-LysC\_CID-ETD\_2, Scans: 26795 - 26795

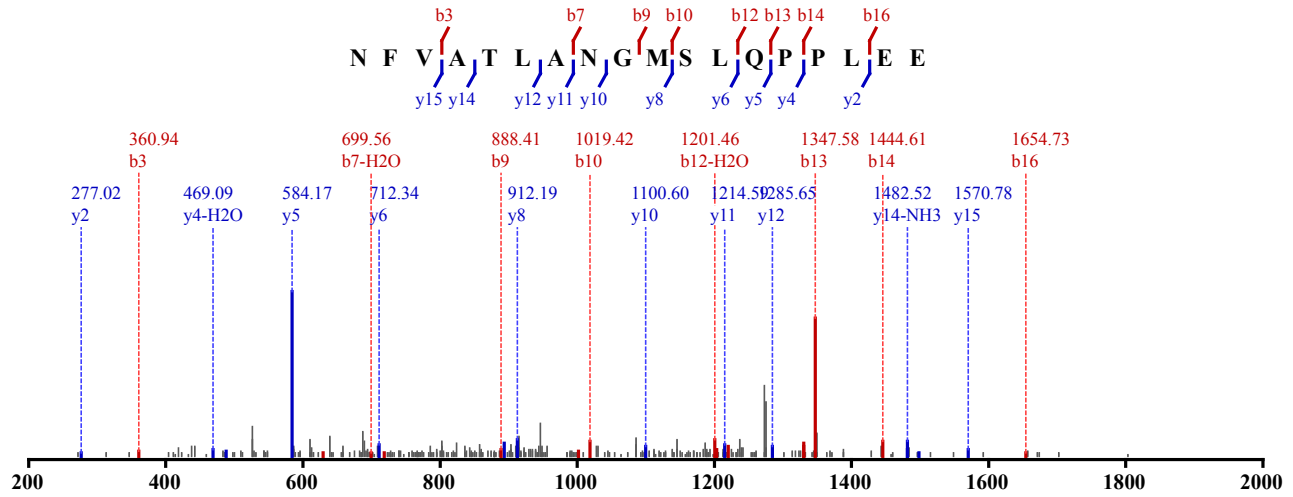

1 x Oxidation (M)  
 Identified in MSS482 with qvalue 0.01  
 Charge: 2, Exp. m/z: 973.981, Calc. m/z: 973.982  
 Data File: HeLa\_GluC\_pH3\_CID\_3xload, Scans: 31852 - 31852

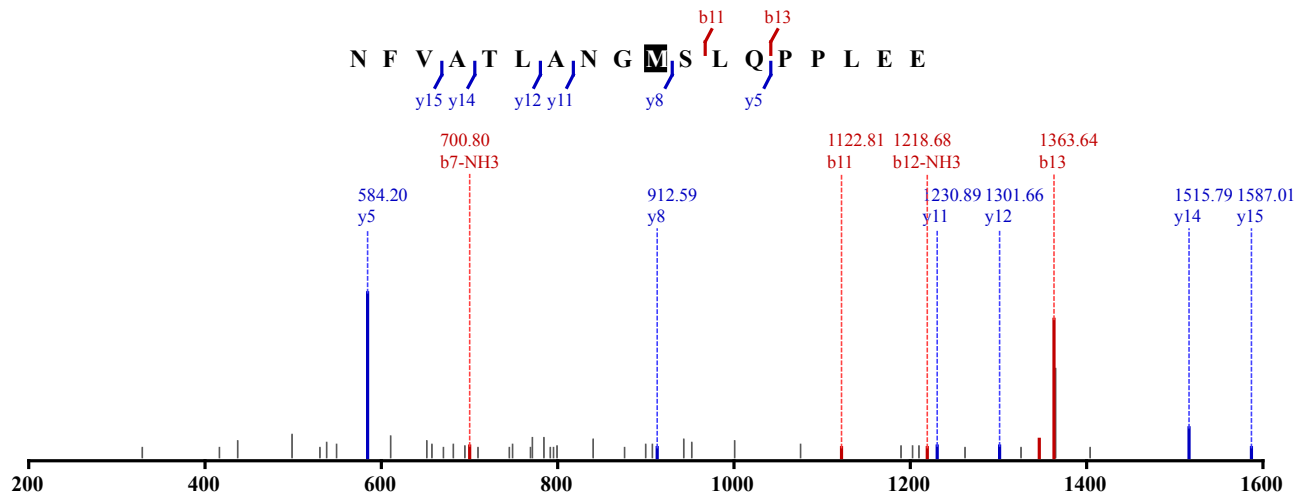

1 x Oxidation (M)  
 Identified in MSS482 with qvalue 0.01  
 Charge: 2, Exp. m/z: 973.982, Calc. m/z: 973.982  
 Data File: HeLa\_GluC\_pH3\_CID\_3xload\_3, Scans: 31442 - 31442

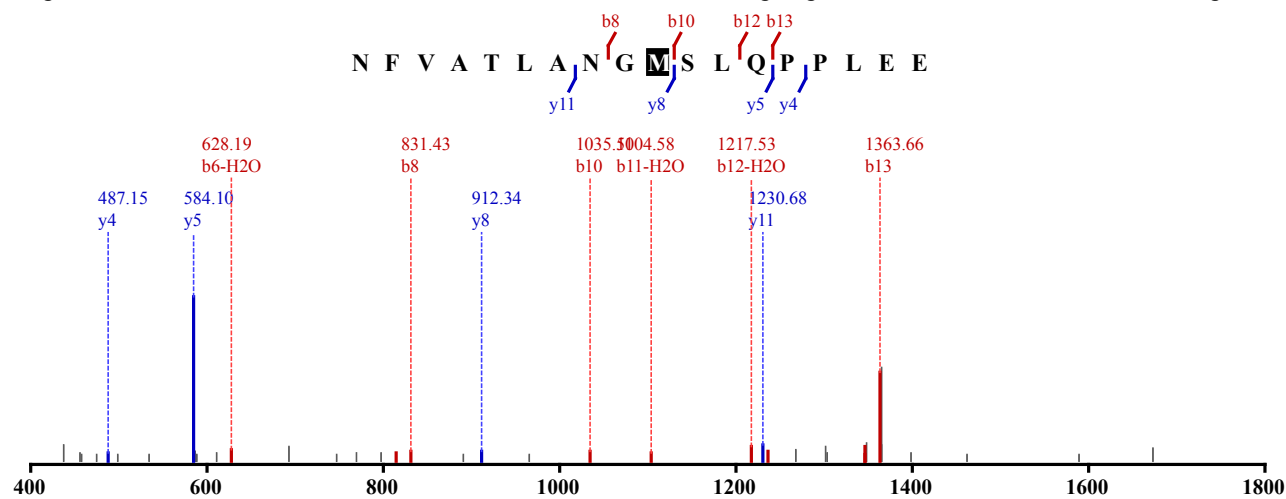

1 x Oxidation (M)  
 Identified in MSS482 with qvalue 0.00  
 Charge: 2, Exp. m/z: 973.981, Calc. m/z: 973.982  
 Data File: HeLa\_GluC\_pH3\_CID\_3xload\_2, Scans: 32973 - 32973

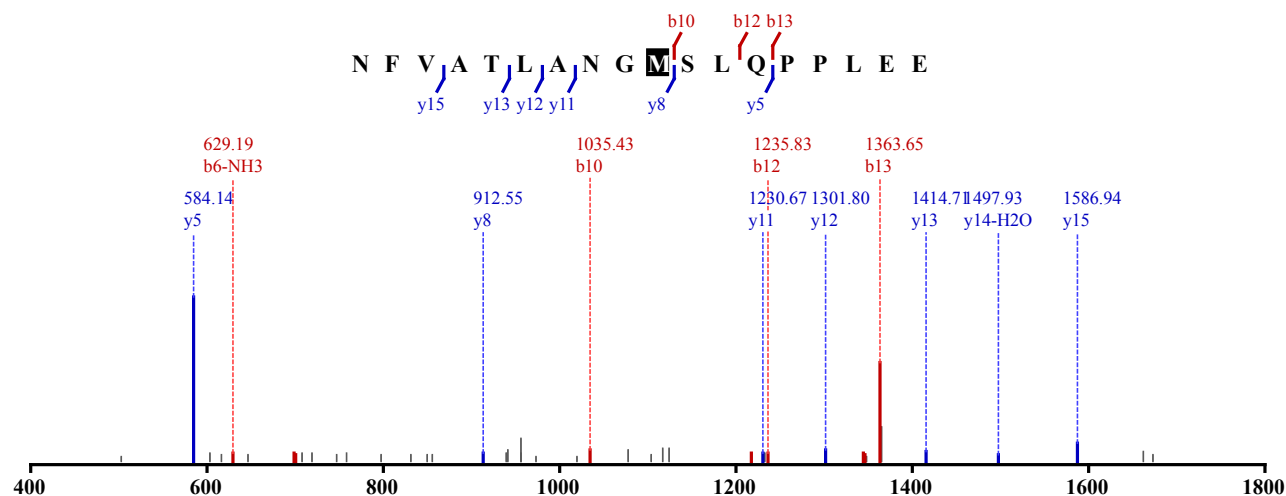

1 x Oxidation (M)  
 Identified in MSS482 with qvalue 0.01  
 Charge: 2, Exp. m/z: 973.980, Calc. m/z: 973.982  
 Data File: HeLa\_GluC\_pH3\_CID\_3xload\_2, Scans: 33022 - 33022

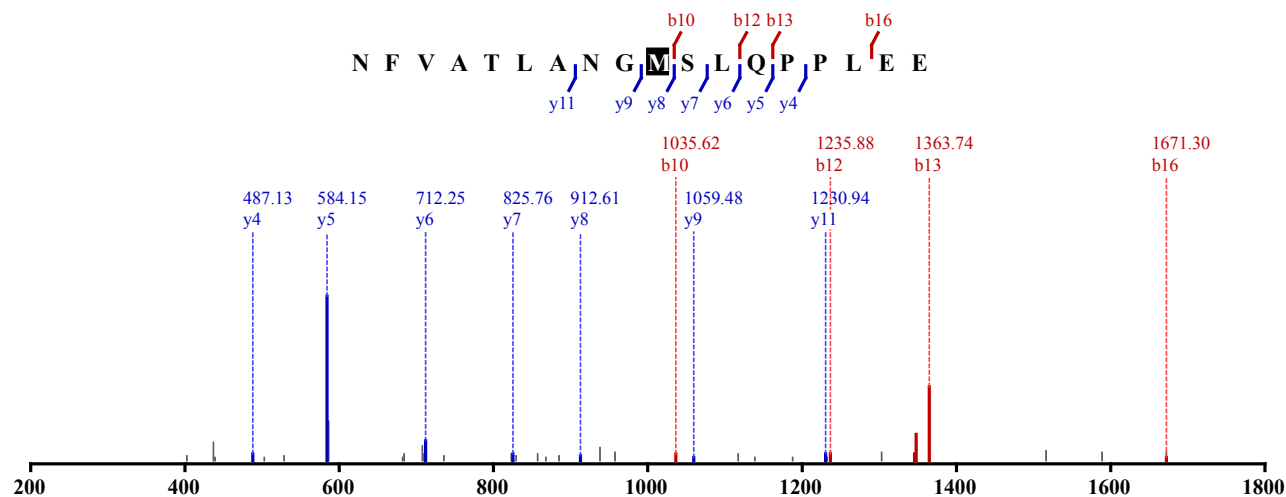

1 x Oxidation (M)  
 Identified in MSS482 with qvalue 0.01  
 Charge: 2, Exp. m/z: 973.981, Calc. m/z: 973.982



Data File: HeLa\_GluC\_pH3\_CID\_3xload, Scans: 31796 - 31796

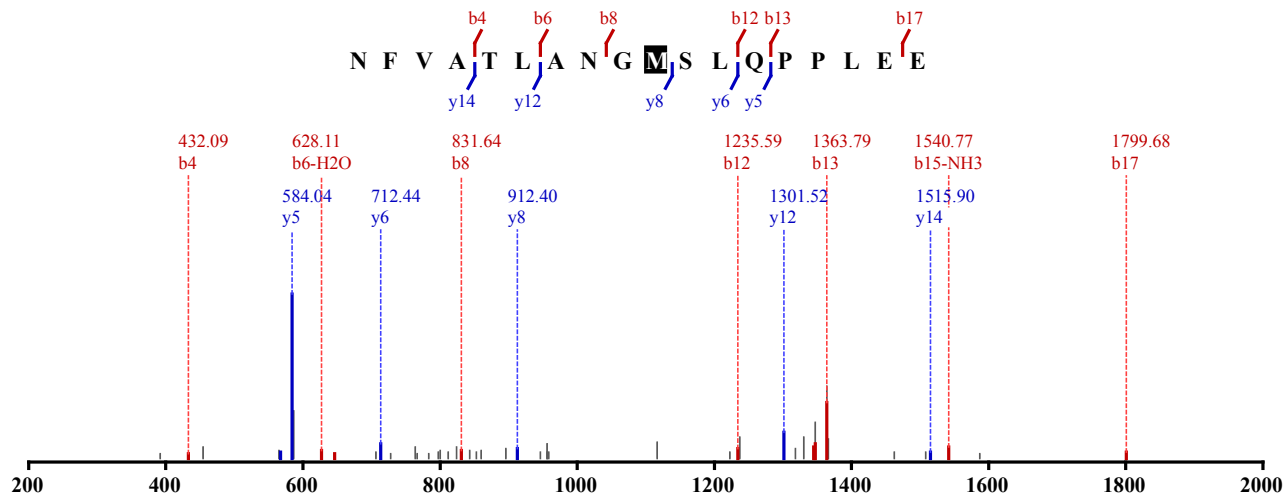

Not Modified

Identified in MSS482 with qvalue 0.00

Charge: 4, Exp. m/z: 545.561, Calc. m/z: 545.562

Data File: HeLa\_GluC\_80pcACN\_CID\_3xload\_3, Scans: 28016 - 28016

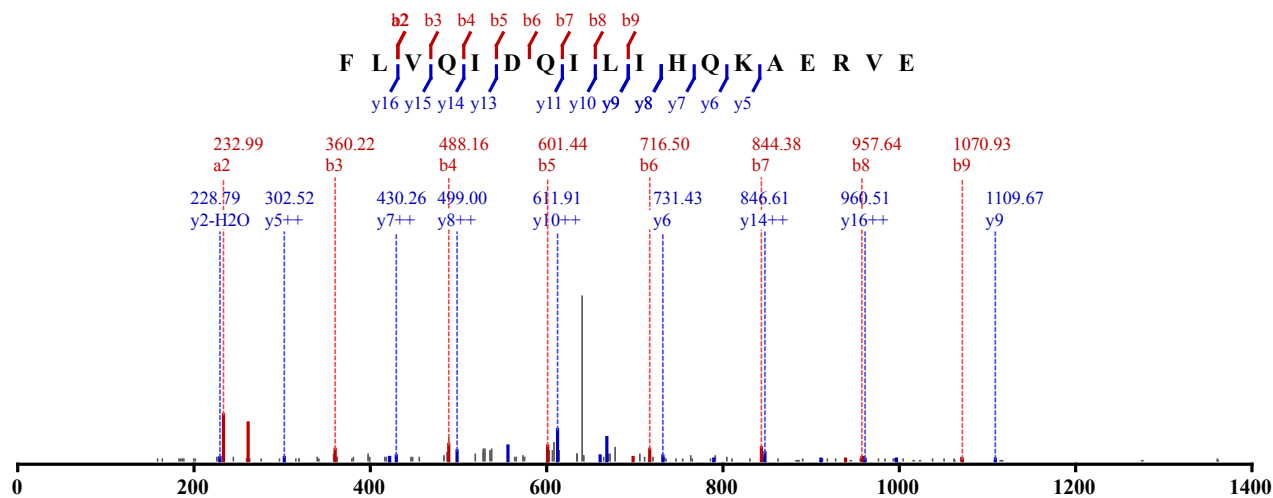

Not Modified

Identified in MSS79 with qvalue 0.01

Charge: 3, Exp. m/z: 592.999, Calc. m/z: 592.664

Data File: HeLa\_AspN-Try\_CID\_2, Scans: 18416 - 18416

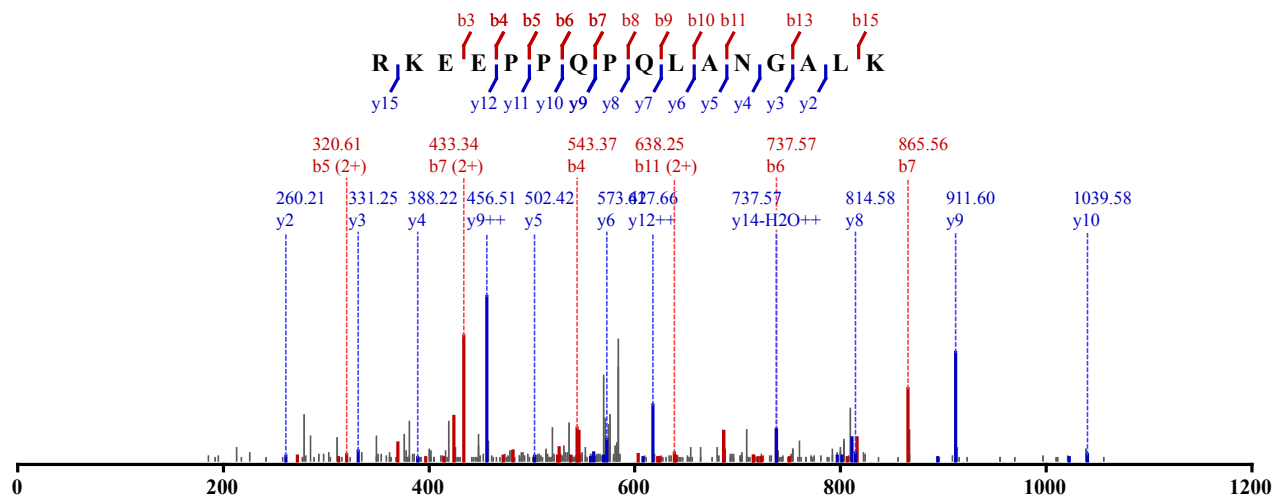

Not Modified

Identified in MSS85 with qvalue 0.00  
 Charge: 3, Exp. m/z: 592.665, Calc. m/z: 592.664  
 Data File: HeLa\_Chytry-Try\_CID\_2, Scans: 17350 - 17350

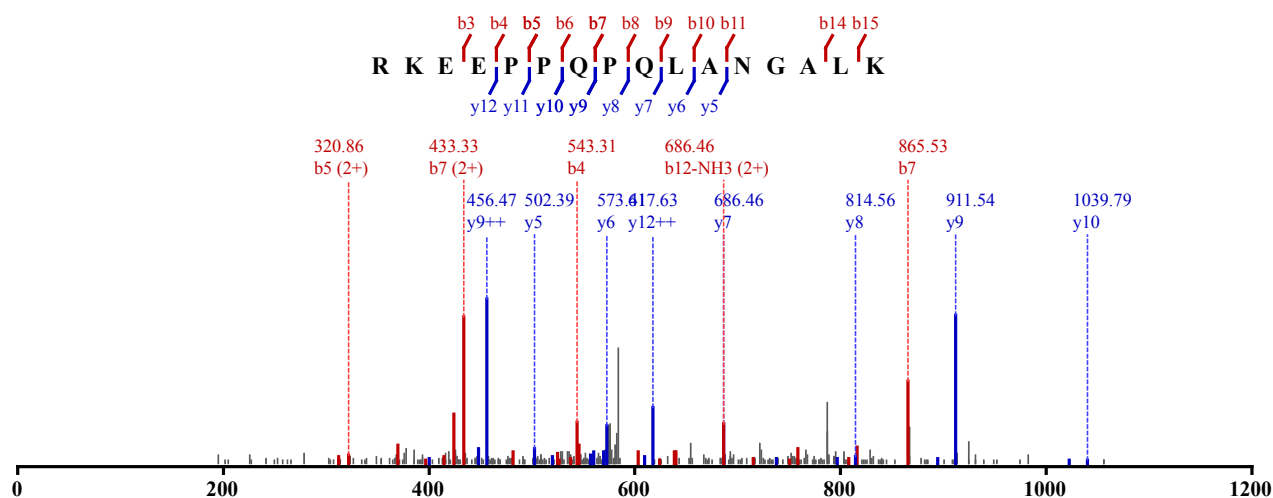

Not Modified  
 Identified in MSS100 with qvalue 0.01  
 Charge: 3, Exp. m/z: 592.665, Calc. m/z: 592.664  
 Data File: HeLa\_GluC-Try\_CID\_1, Scans: 16049 - 16049

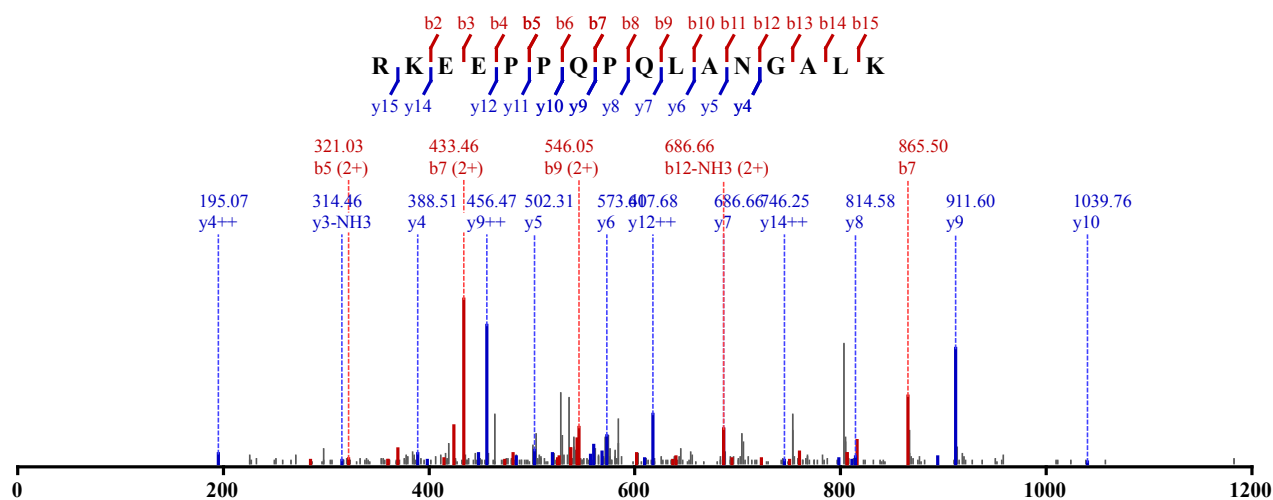

Not Modified  
 Identified in MSS110 with qvalue 0.00  
 Charge: 3, Exp. m/z: 592.664, Calc. m/z: 592.664  
 Data File: HeLa\_LysC-try\_CID\_1, Scans: 16537 - 16537

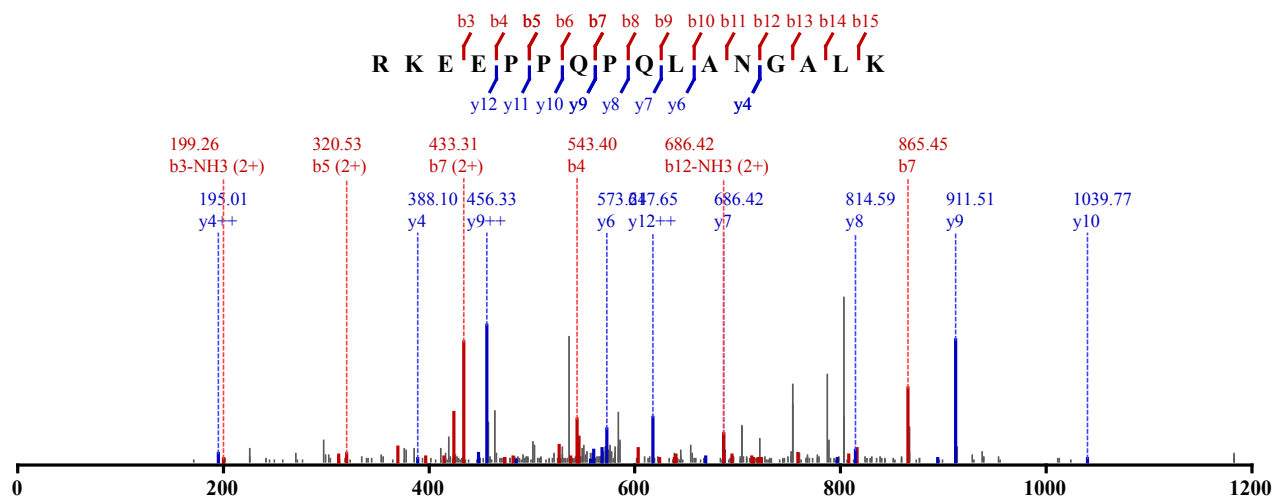

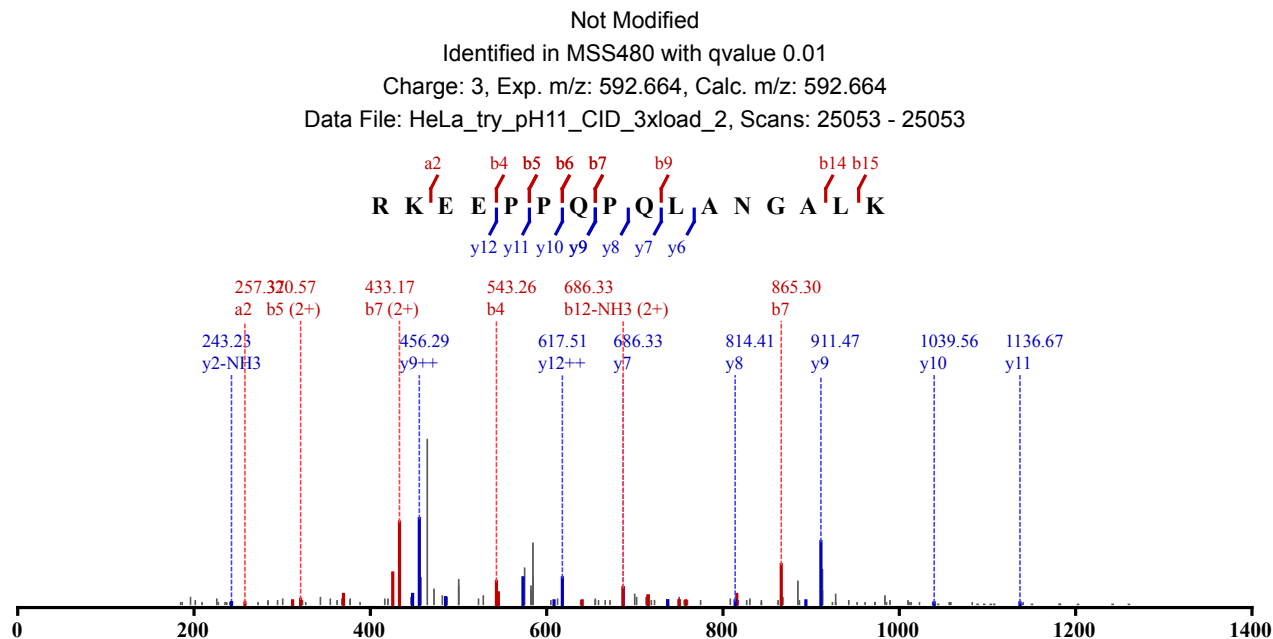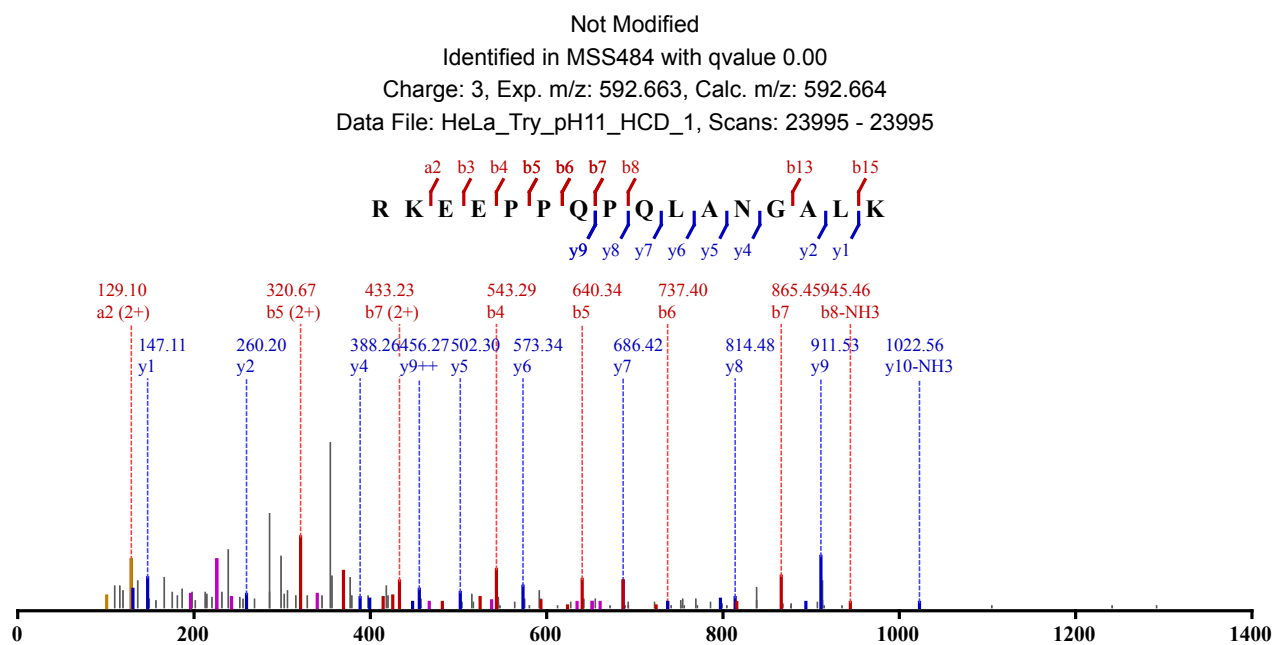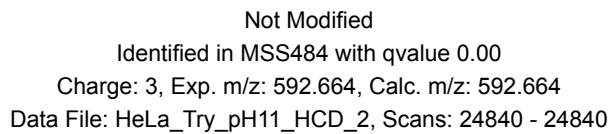

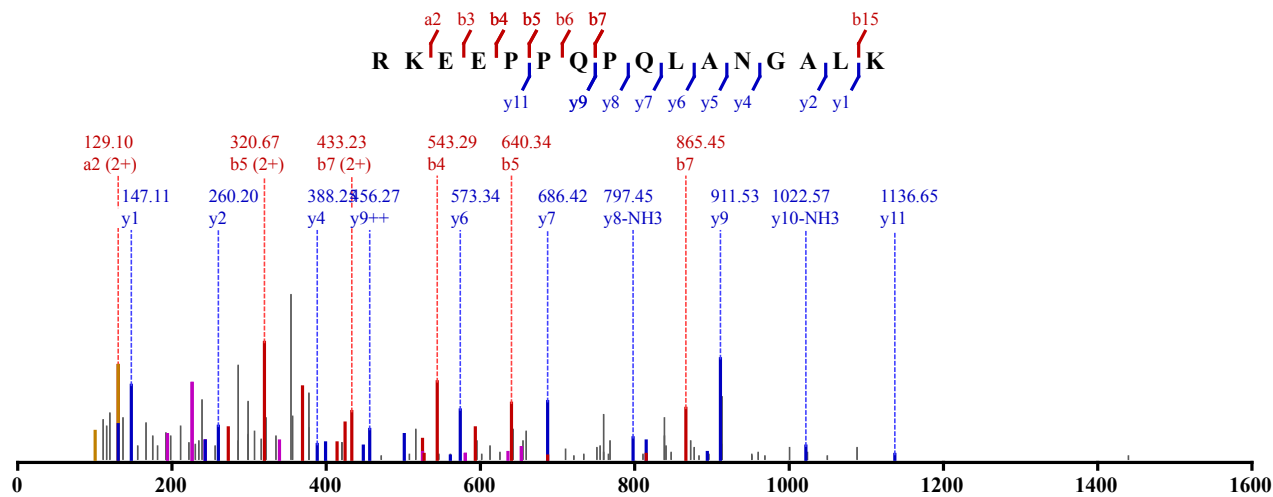

Not Modified

Identified in MSS479 with qvalue 0.00

Charge: 2, Exp. m/z: 849.430, Calc. m/z: 849.427

Data File: HeLa\_AspN\_pH3\_HCD\_2, Scans: 47389 - 47389

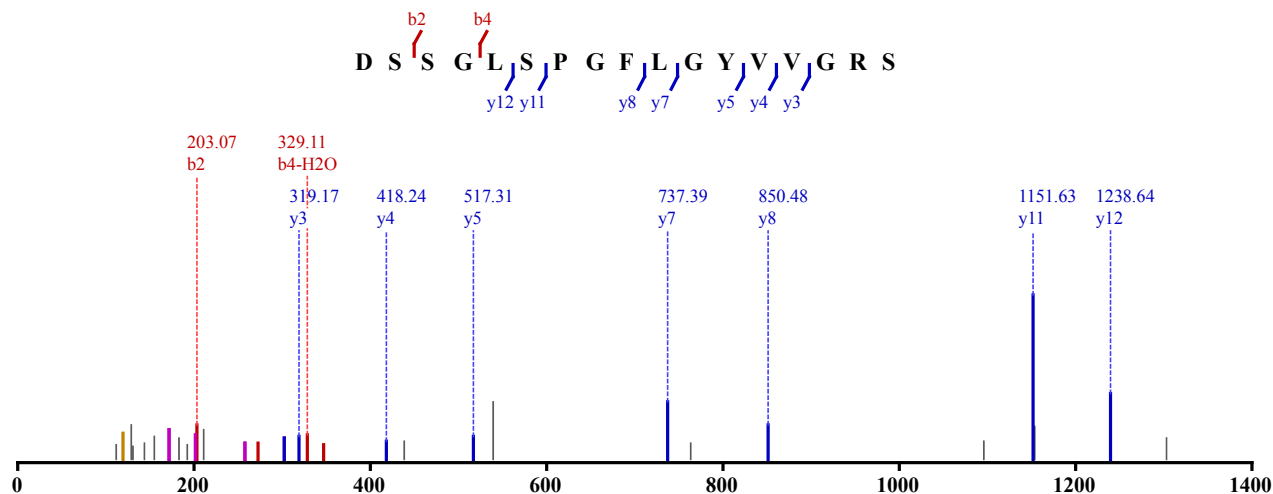

Not Modified

Identified in MSS479 with qvalue 0.00

Charge: 2, Exp. m/z: 849.427, Calc. m/z: 849.427

Data File: HeLa\_AspN\_pH3\_HCD\_3, Scans: 47449 - 47449

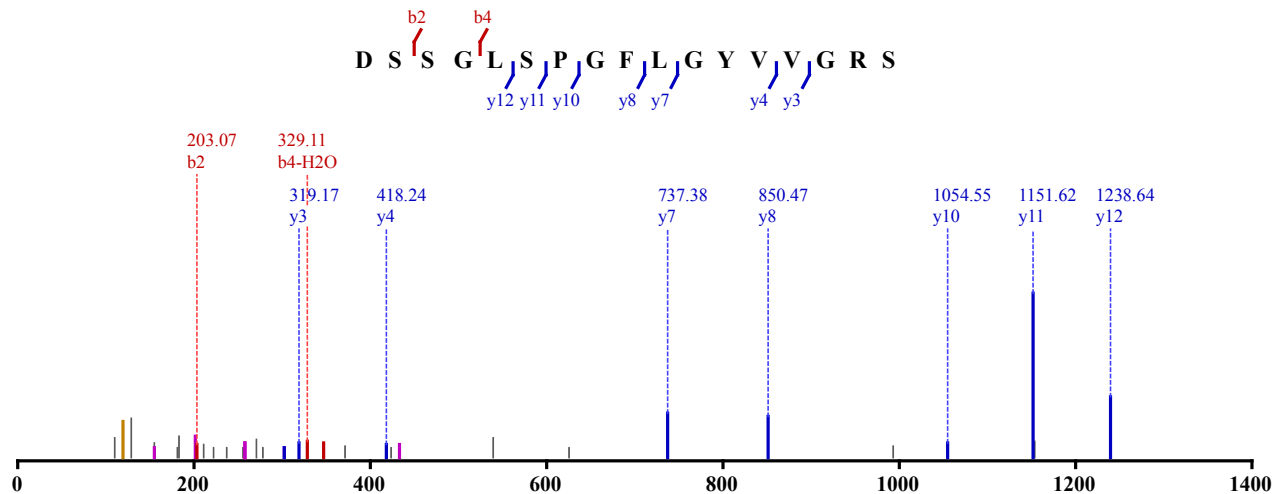

Not Modified

Identified in MSS479 with qvalue 0.01

Charge: 2, Exp. m/z: 849.430, Calc. m/z: 849.427

Data File: HeLa\_AspN\_pH5\_HCD\_3, Scans: 45734 - 45734

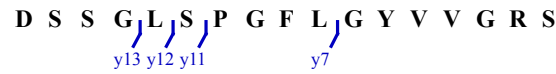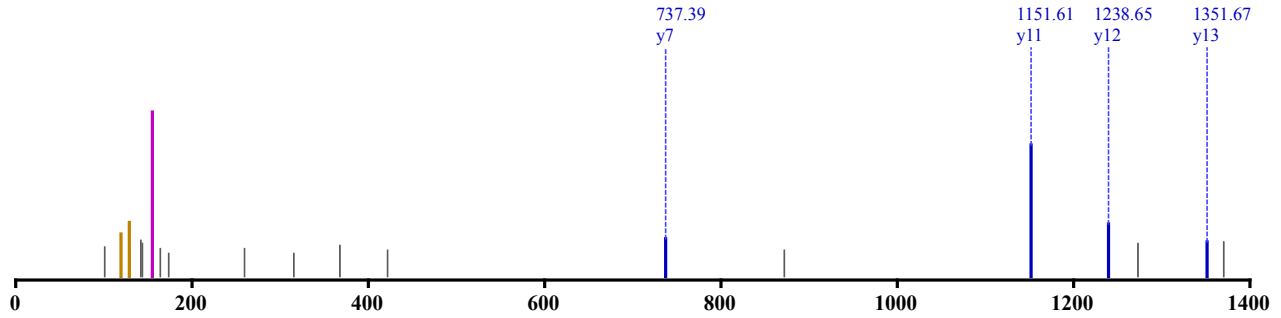

Not Modified

Identified in MSS479 with qvalue 0.00

Charge: 2, Exp. m/z: 849.427, Calc. m/z: 849.427

Data File: HeLa\_AspN\_pH3\_HCD\_1, Scans: 47829 - 47829

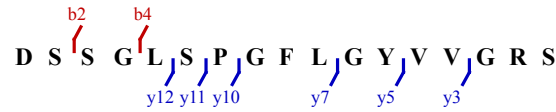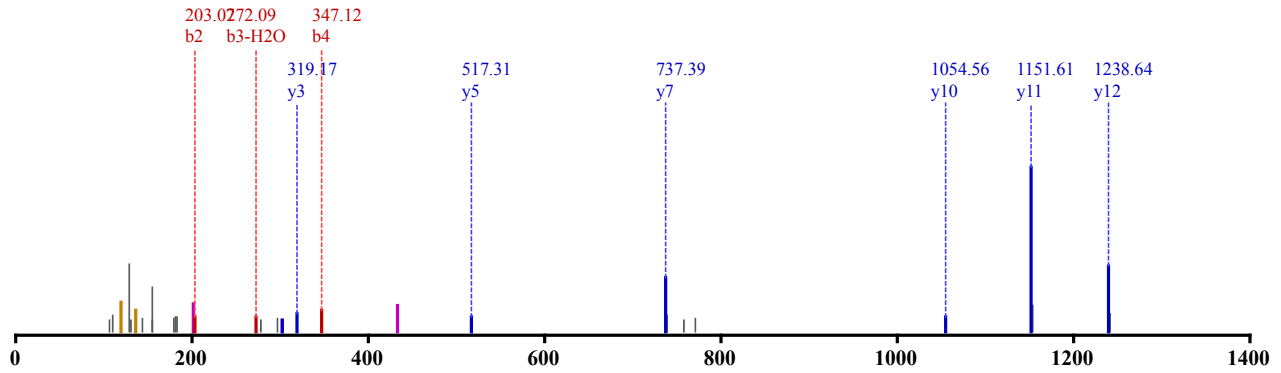

Not Modified

Identified in MSS479 with qvalue 0.00

Charge: 2, Exp. m/z: 849.427, Calc. m/z: 849.427

Data File: HeLa\_AspN\_pH4\_HCD\_1, Scans: 45404 - 45404

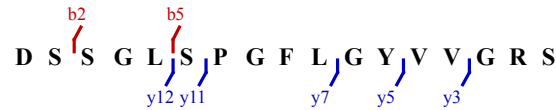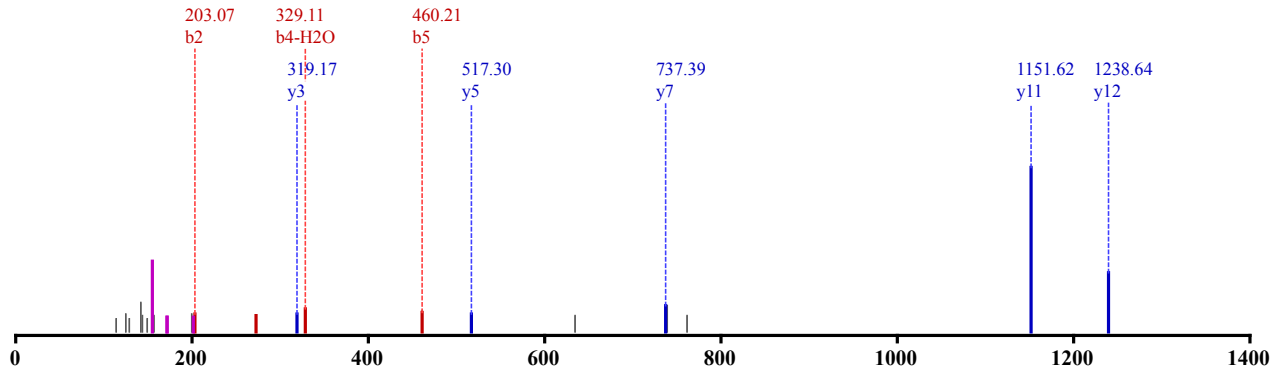

Not Modified

Identified in MSS479 with qvalue 0.00  
 Charge: 2, Exp. m/z: 849.428, Calc. m/z: 849.427  
 Data File: HeLa\_AspN\_pH4\_HCD\_1, Scans: 45461 - 45461

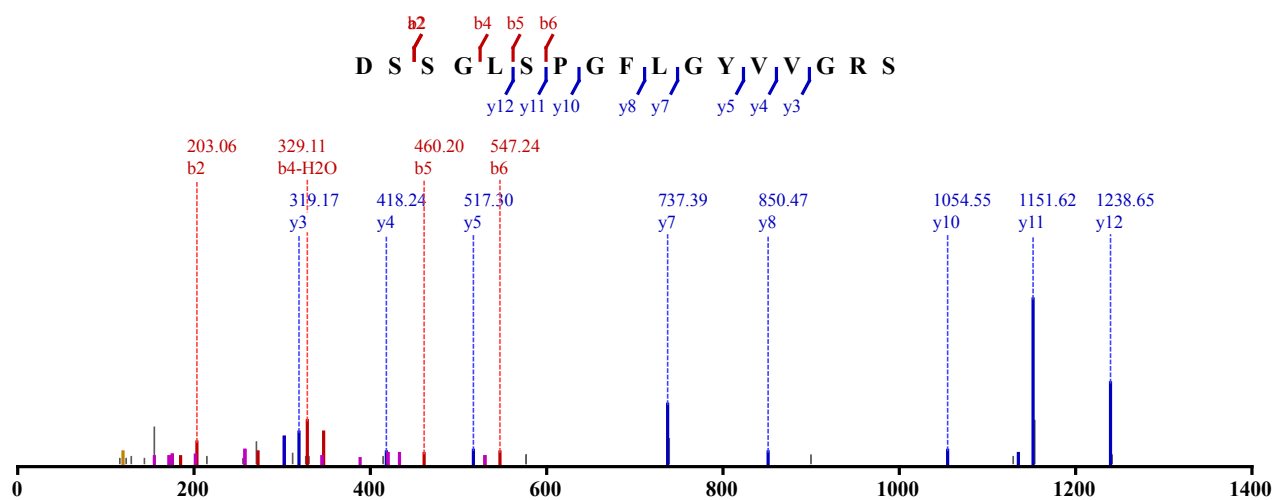

Not Modified  
 Identified in MSS479 with qvalue 0.00  
 Charge: 2, Exp. m/z: 849.427, Calc. m/z: 849.427  
 Data File: HeLa\_AspN\_pH4\_HCD\_2, Scans: 45113 - 45113

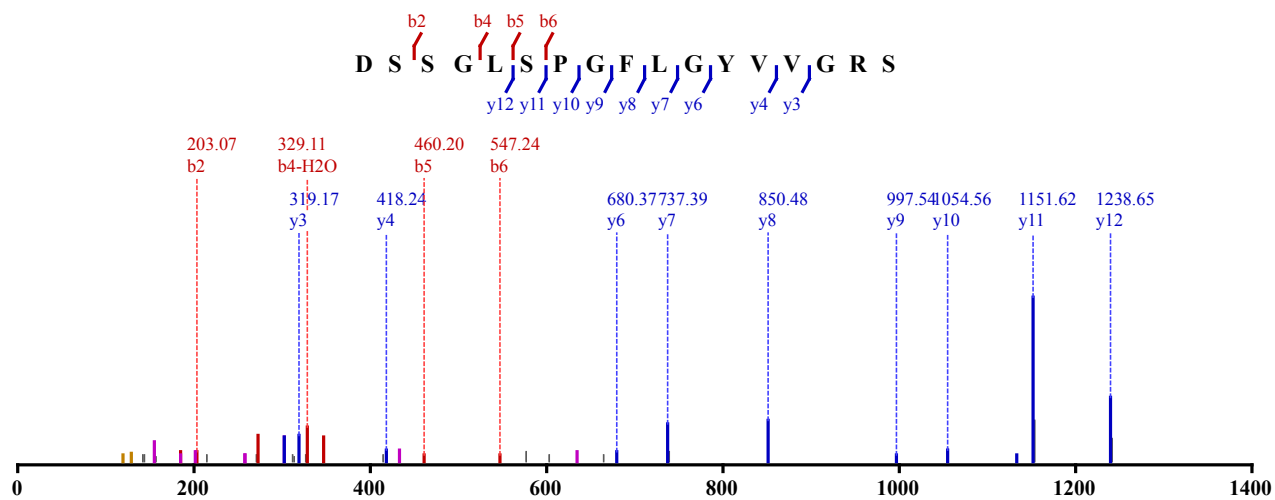

Not Modified  
 Identified in MSS479 with qvalue 0.00  
 Charge: 2, Exp. m/z: 849.427, Calc. m/z: 849.427  
 Data File: HeLa\_AspN\_pH4\_HCD\_3, Scans: 43892 - 43892

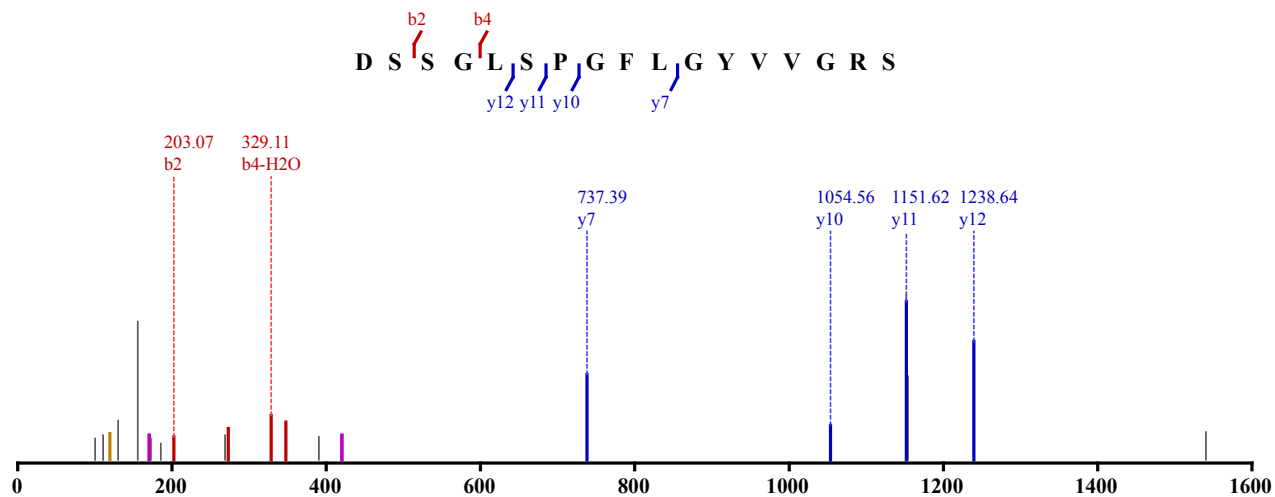

Not Modified

Identified in MSS479 with qvalue 0.00

Charge: 2, Exp. m/z: 849.428, Calc. m/z: 849.427

Data File: HeLa\_AspN\_pH4\_HCD\_3, Scans: 43950 - 43950

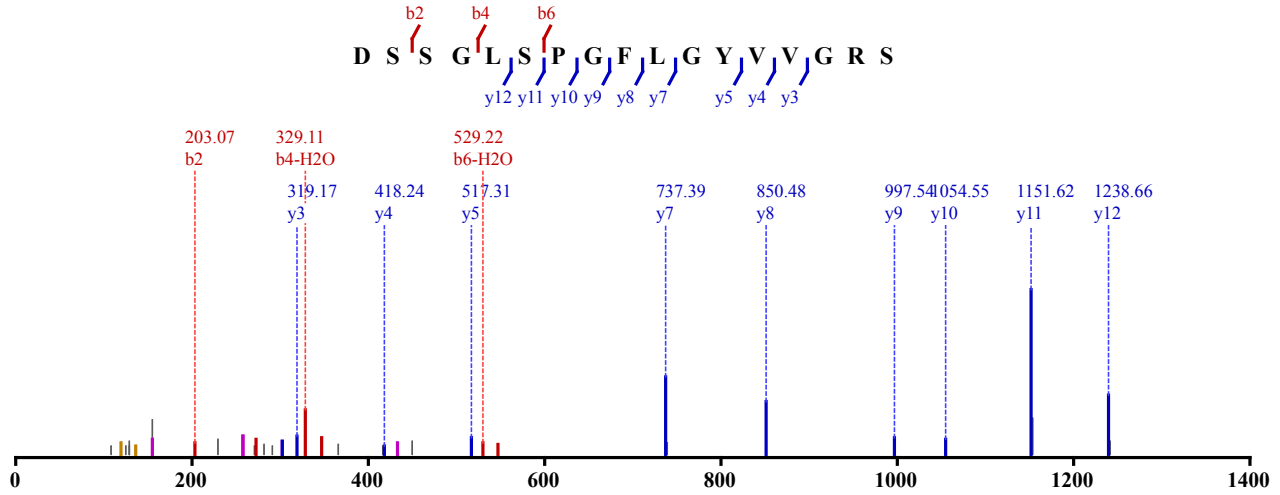

Not Modified

Identified in MSS483 with qvalue 0.00

Charge: 2, Exp. m/z: 849.431, Calc. m/z: 849.427

Data File: HeLa\_AspN\_pH3\_CID\_3xload, Scans: 38267 - 38267

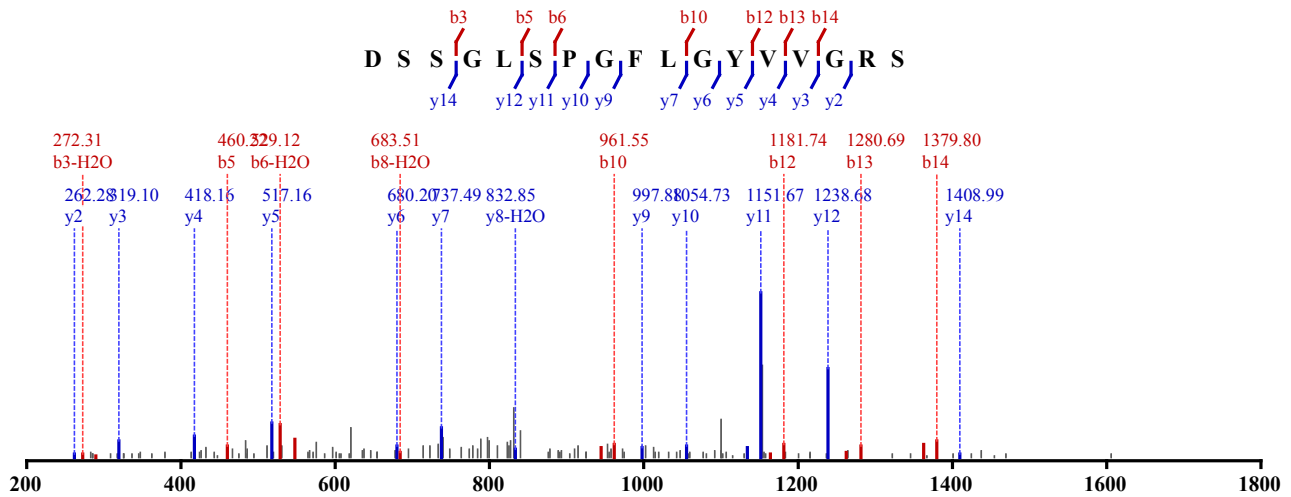

Not Modified

Identified in MSS483 with qvalue 0.00

Charge: 2, Exp. m/z: 849.429, Calc. m/z: 849.427

Data File: HeLa\_AspN\_pH4\_CID\_3xload\_2, Scans: 29560 - 29560

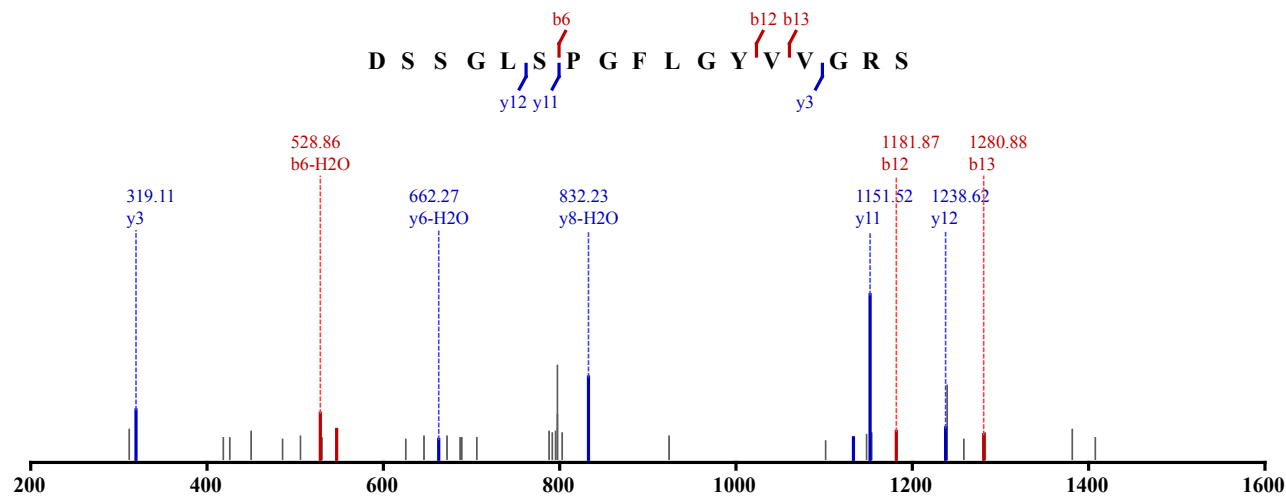

Not Modified  
 Identified in MSS483 with qvalue 0.00  
 Charge: 2, Exp. m/z: 849.430, Calc. m/z: 849.427  
 Data File: HeLa\_AspN\_pH4\_CID\_3xload\_2, Scans: 29615 - 29615

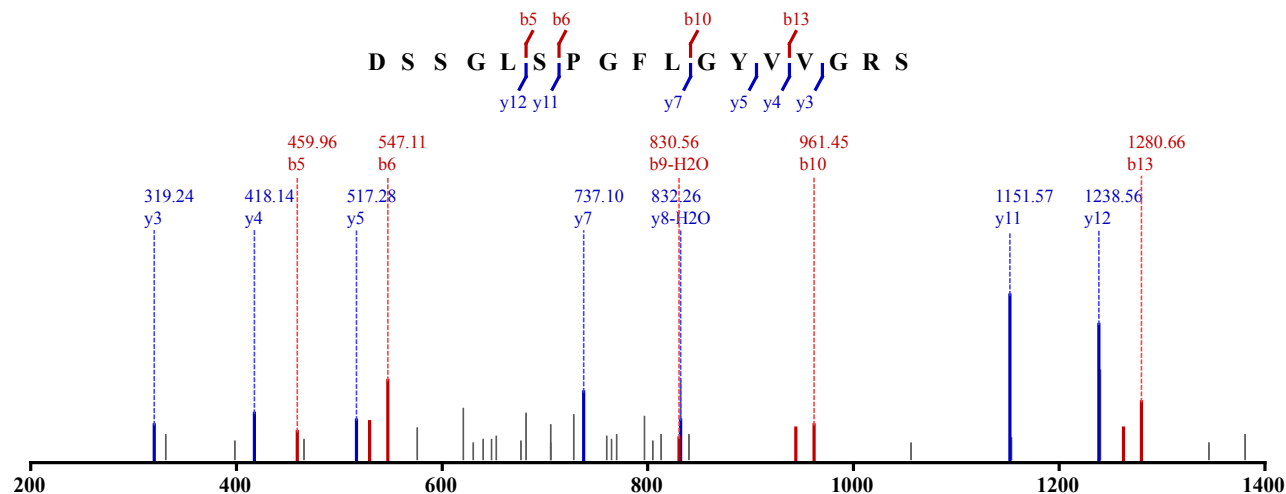

Not Modified  
 Identified in MSS483 with qvalue 0.00  
 Charge: 2, Exp. m/z: 849.430, Calc. m/z: 849.427  
 Data File: HeLa\_AspN\_pH4\_CID\_3xload, Scans: 30144 - 30144

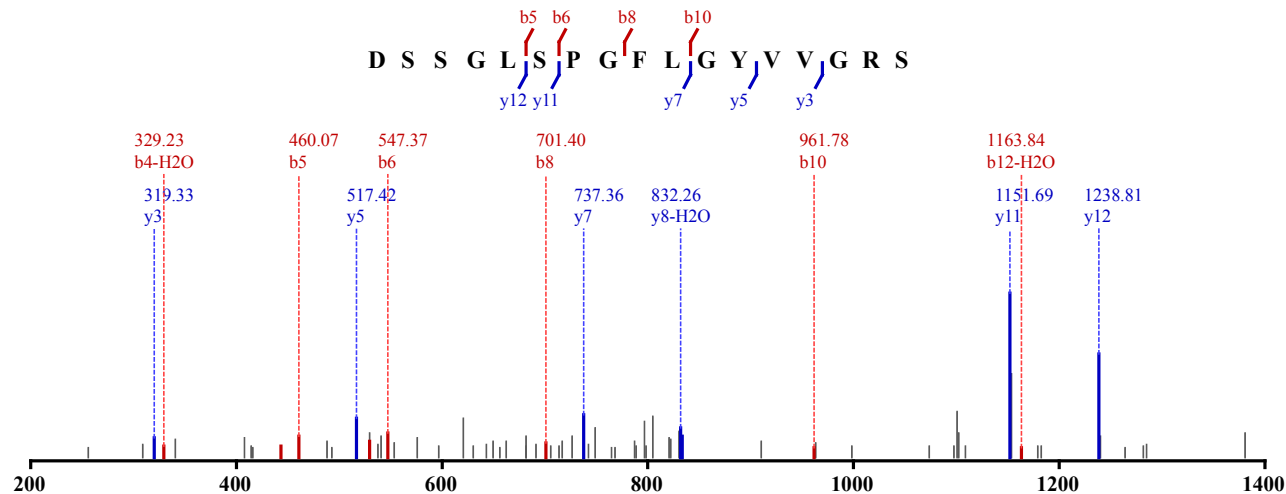

Not Modified  
 Identified in MSS483 with qvalue 0.00  
 Charge: 2, Exp. m/z: 849.429, Calc. m/z: 849.427



Data File: HeLa\_AspN\_pH4\_CID\_3xload, Scans: 30200 - 30200

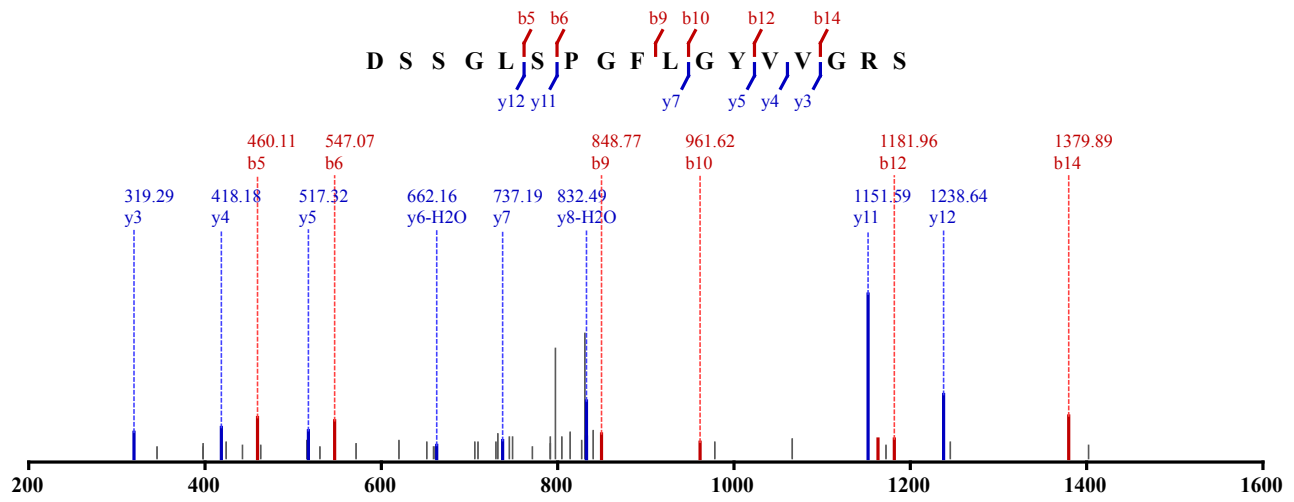

Not Modified

Identified in MSS483 with qvalue 0.01

Charge: 2, Exp. m/z: 850.430, Calc. m/z: 849.427

Data File: HeLa\_AspN\_pH3\_CID\_3xload\_2, Scans: 38084 - 38084

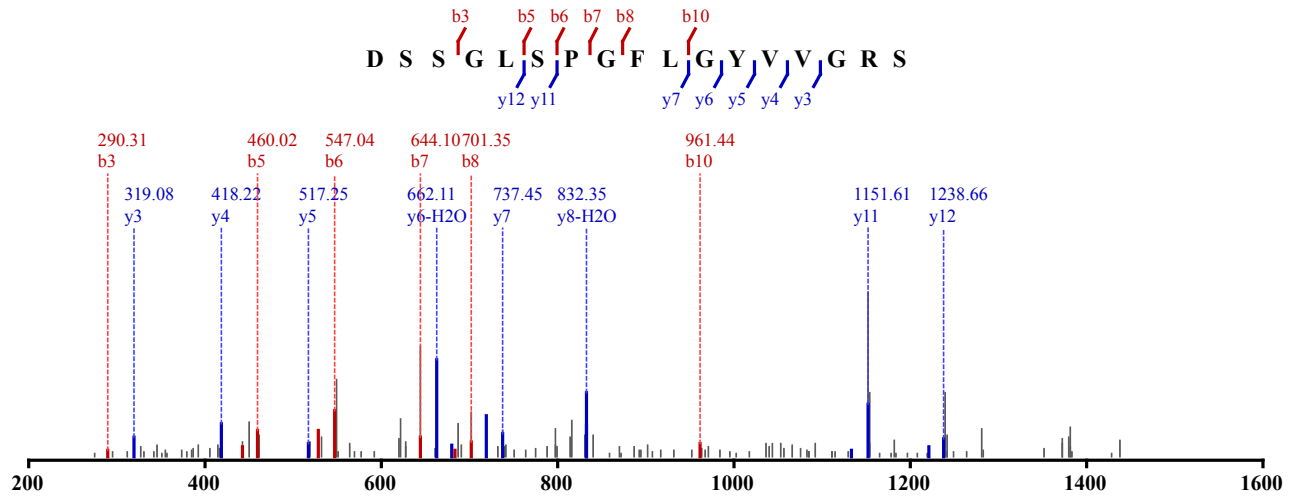

Not Modified

Identified in MSS483 with qvalue 0.01

Charge: 2, Exp. m/z: 849.932, Calc. m/z: 849.427

Data File: HeLa\_AspN\_pH5\_CID\_3xload\_2, Scans: 29675 - 29675

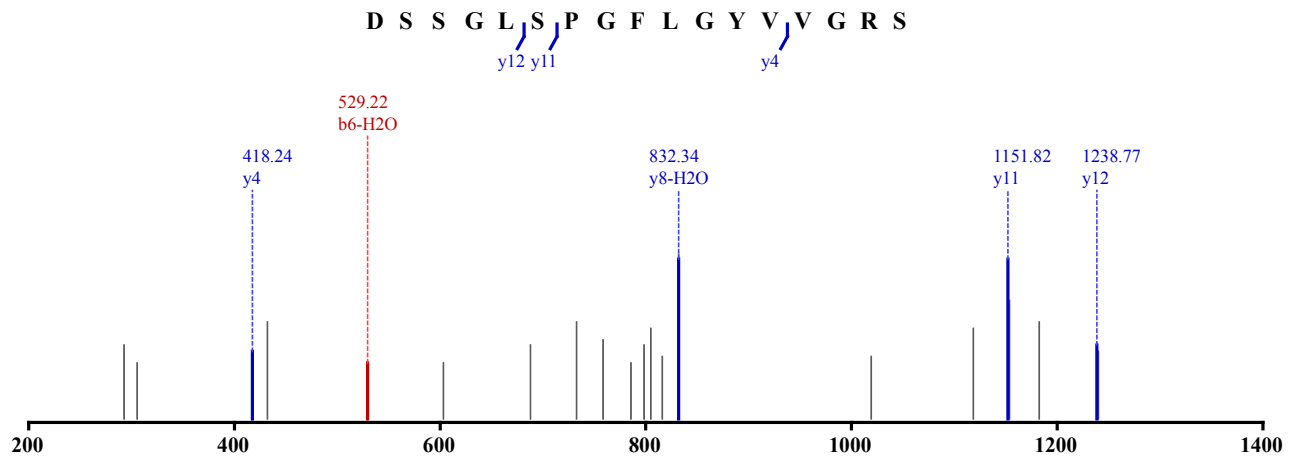

Not Modified

Identified in MSS484 with qvalue 0.00  
 Charge: 3, Exp. m/z: 616.606, Calc. m/z: 616.607  
 Data File: HeLa\_Try\_pH3\_HCD\_3, Scans: 23527 - 23527

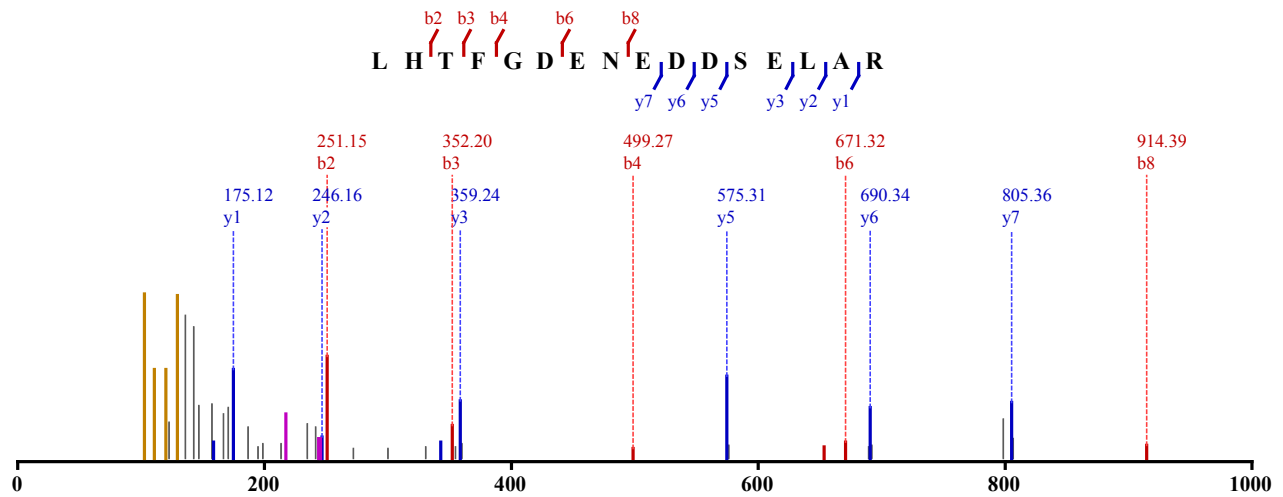

Not Modified  
 Identified in MSS484 with qvalue 0.00  
 Charge: 3, Exp. m/z: 616.607, Calc. m/z: 616.607  
 Data File: HeLa\_Try\_pH3\_HCD\_1, Scans: 23605 - 23605

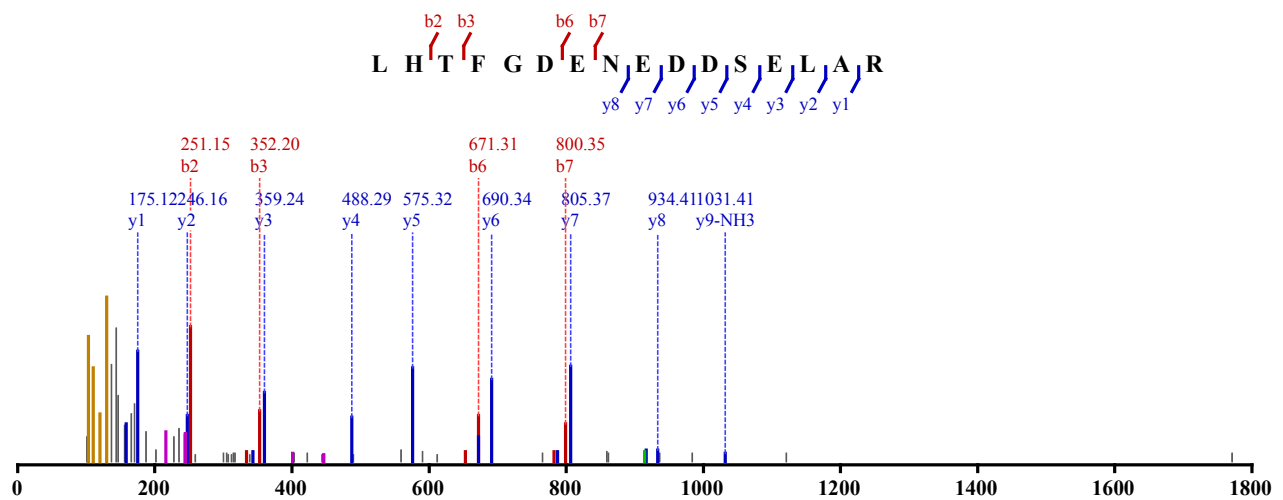

Not Modified  
 Identified in MSS484 with qvalue 0.00  
 Charge: 3, Exp. m/z: 616.607, Calc. m/z: 616.607  
 Data File: HeLa\_Try\_pH3\_HCD\_2, Scans: 23748 - 23748

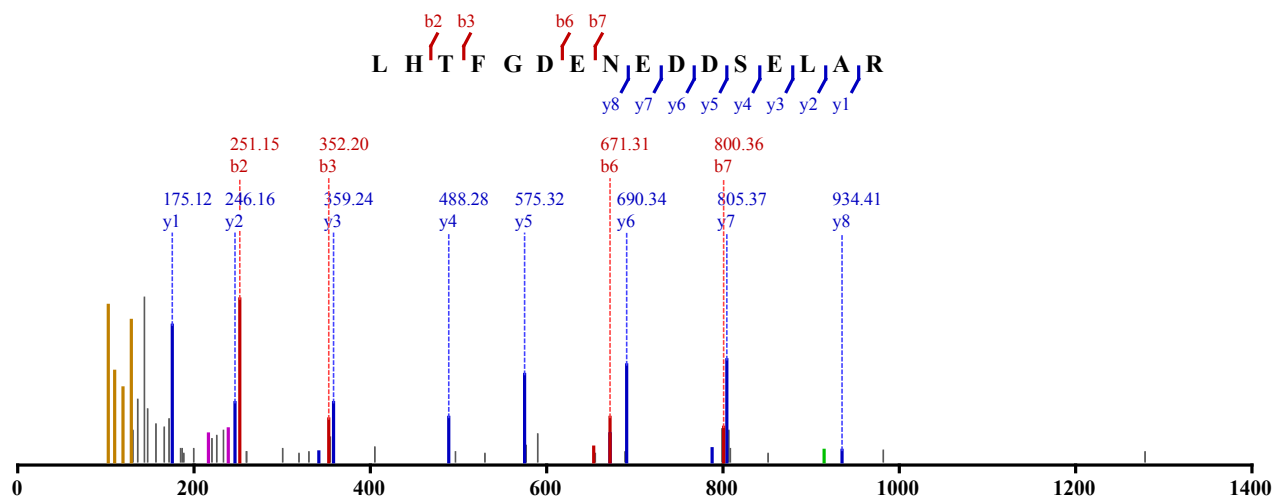

1 x Oxidation (M)

Identified in MSS480 with qvalue 0.00

Charge: 2, Exp. m/z: 636.860, Calc. m/z: 636.862

Data File: HeLa\_try\_pH11\_CID\_3xload\_2, Scans: 52871 - 52871

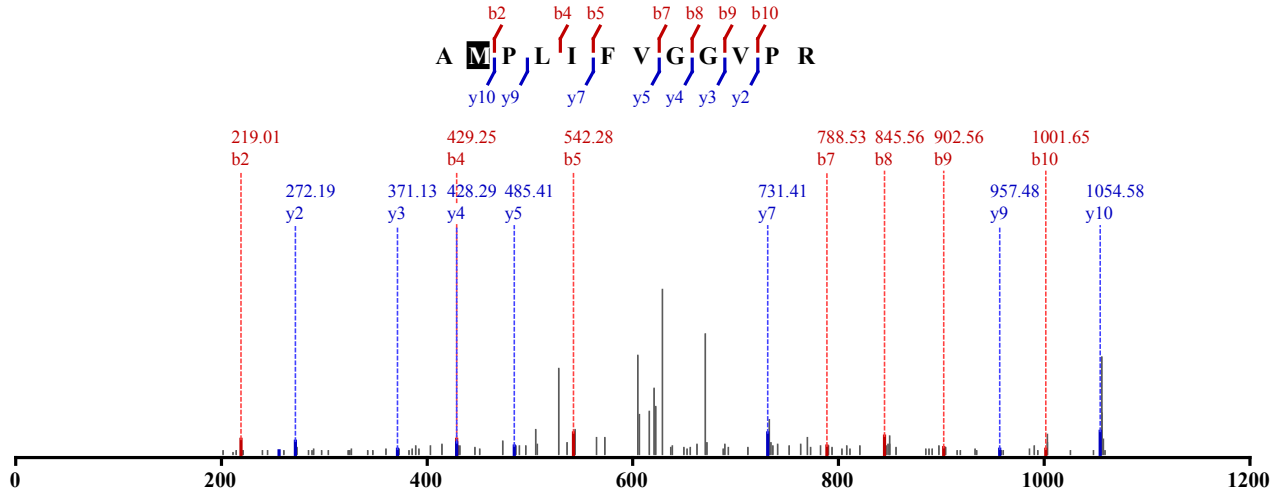

1 x Oxidation (M)

Identified in MSS480 with qvalue 0.00

Charge: 2, Exp. m/z: 636.860, Calc. m/z: 636.857

Data File: HeLa\_try\_pH11\_CID\_3xload\_3, Scans: 58690 - 58690

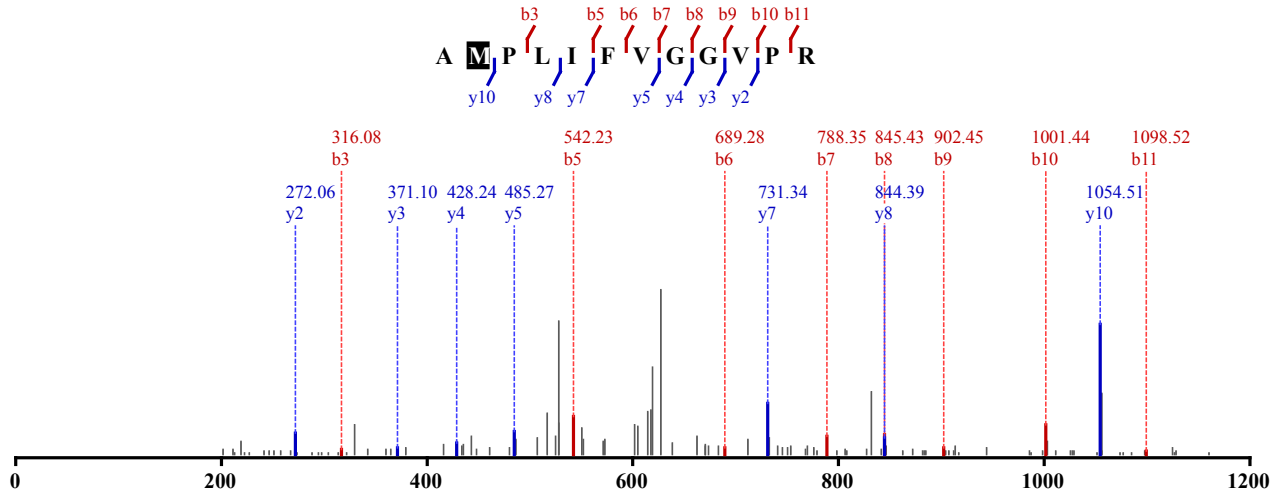

1 x Oxidation (M)

Identified in MSS480 with qvalue 0.00

Charge: 2, Exp. m/z: 636.860, Calc. m/z: 636.857

Data File: HeLa\_try\_pH11\_CID\_3xload\_3, Scans: 58854 - 58854

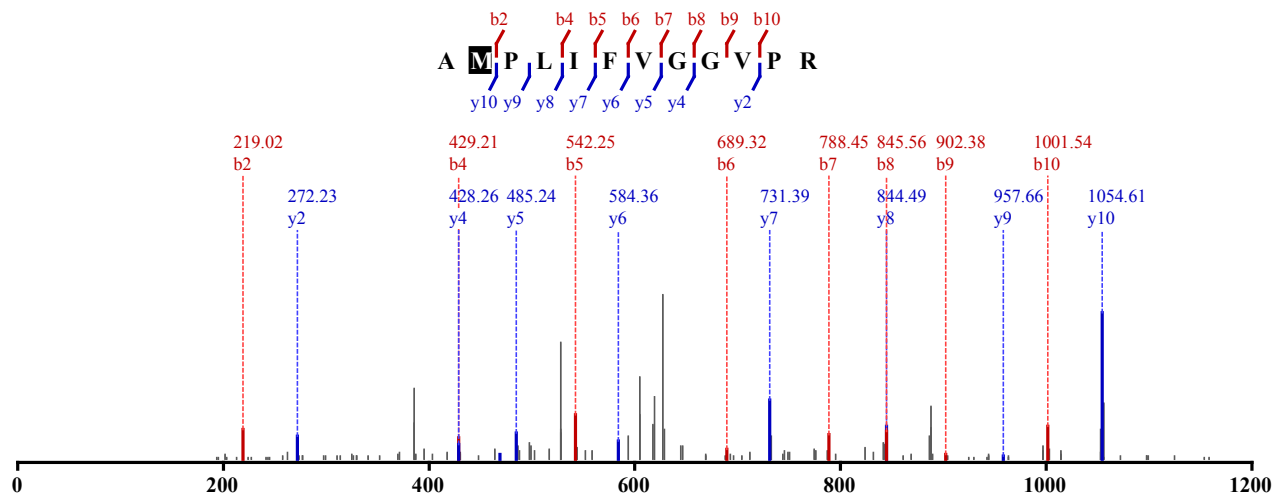

1 x Oxidation (M)

Identified in MSS480 with qvalue 0.00

Charge: 2, Exp. m/z: 636.860, Calc. m/z: 636.857

Data File: HeLa\_try\_pH11\_CID\_3xload\_3, Scans: 58865 - 58865

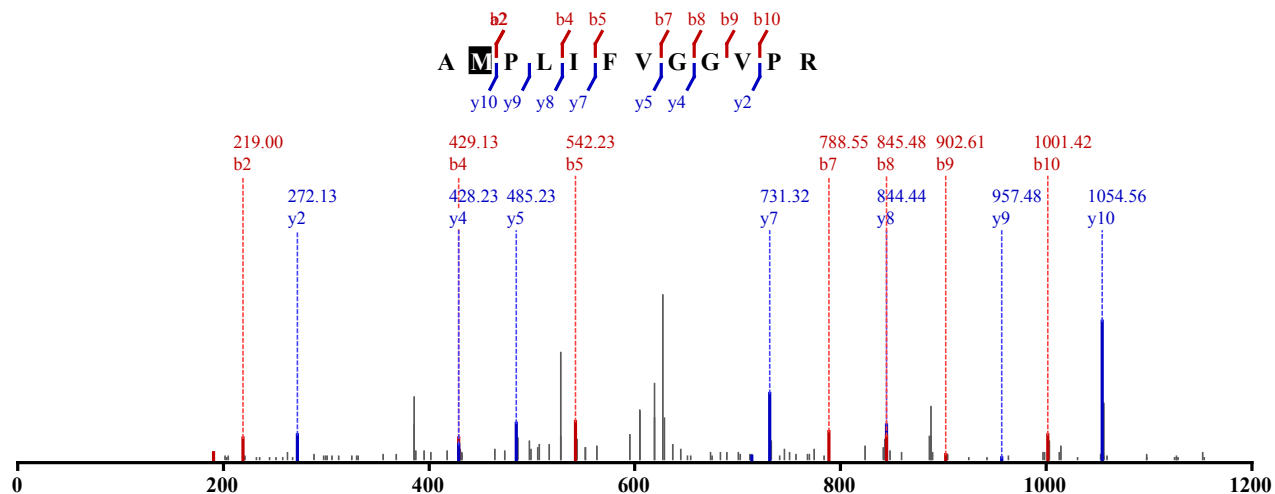

1 x Oxidation (M)

Identified in MSS480 with qvalue 0.00

Charge: 2, Exp. m/z: 636.860, Calc. m/z: 636.857

Data File: HeLa\_try\_pH11\_CID\_3xload, Scans: 48834 - 48834

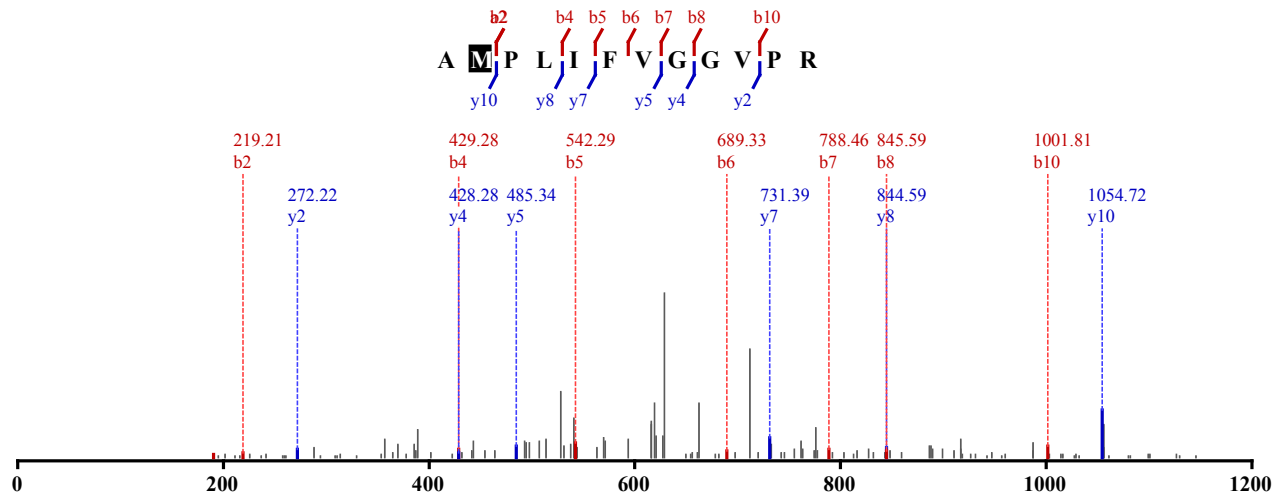

1 x Oxidation (M)

Identified in MSS480 with qvalue 0.00

Charge: 2, Exp. m/z: 636.860, Calc. m/z: 636.857

Data File: HeLa\_try\_pH8\_CID\_3xload\_3, Scans: 53880 - 53880

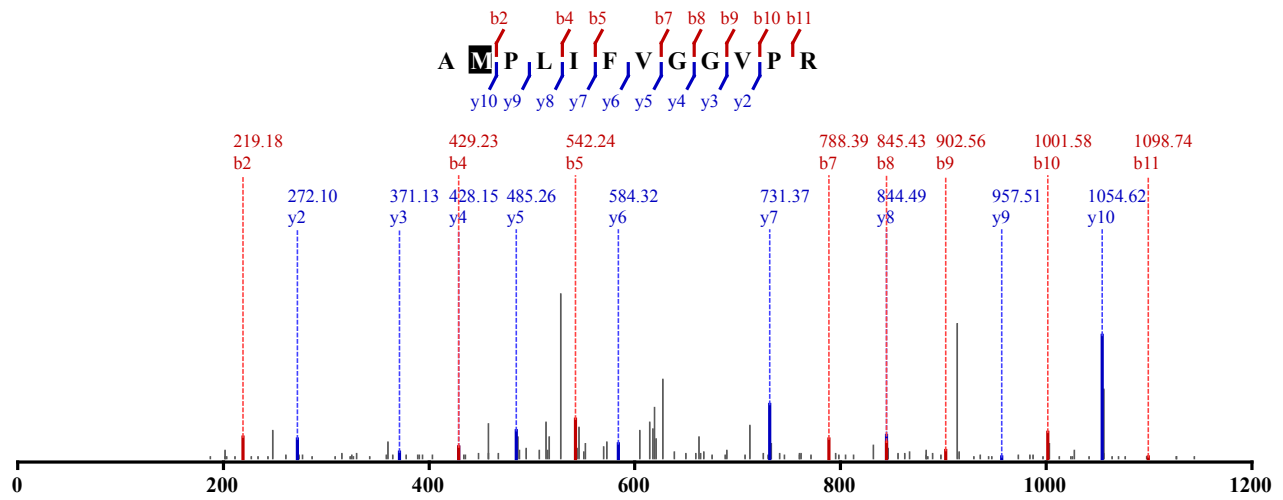

1 x Oxidation (M)

Identified in MSS480 with qvalue 0.00

Charge: 2, Exp. m/z: 636.861, Calc. m/z: 636.862

Data File: HeLa\_try\_pH8\_CID\_3xload\_3, Scans: 54026 - 54026

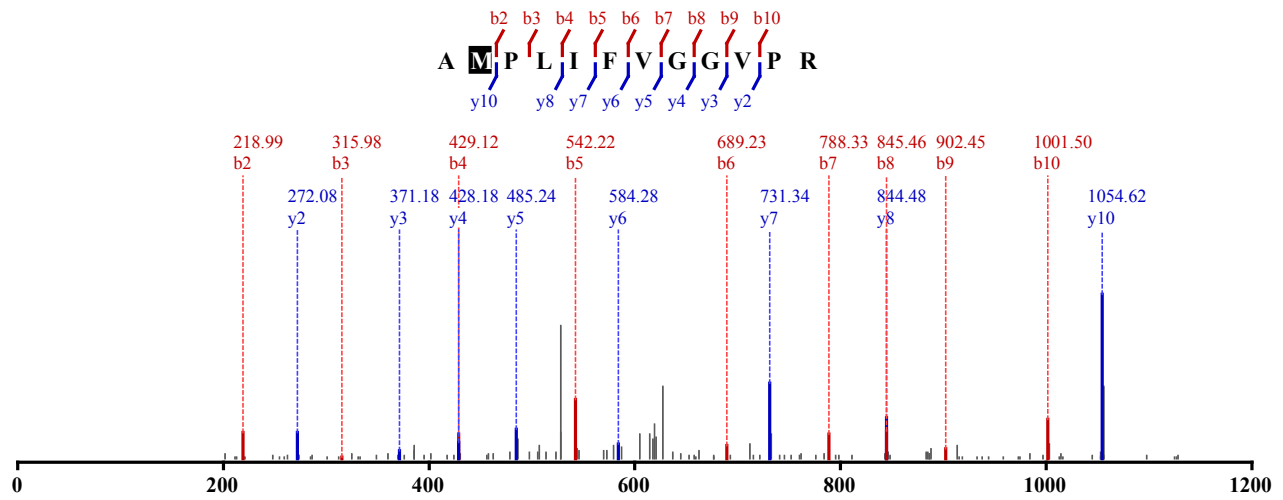

1 x Oxidation (M)

Identified in MSS484 with qvalue 0.00

Charge: 2, Exp. m/z: 636.861, Calc. m/z: 636.862

Data File: HeLa\_Try\_pH11\_HCD\_3, Scans: 49987 - 49987

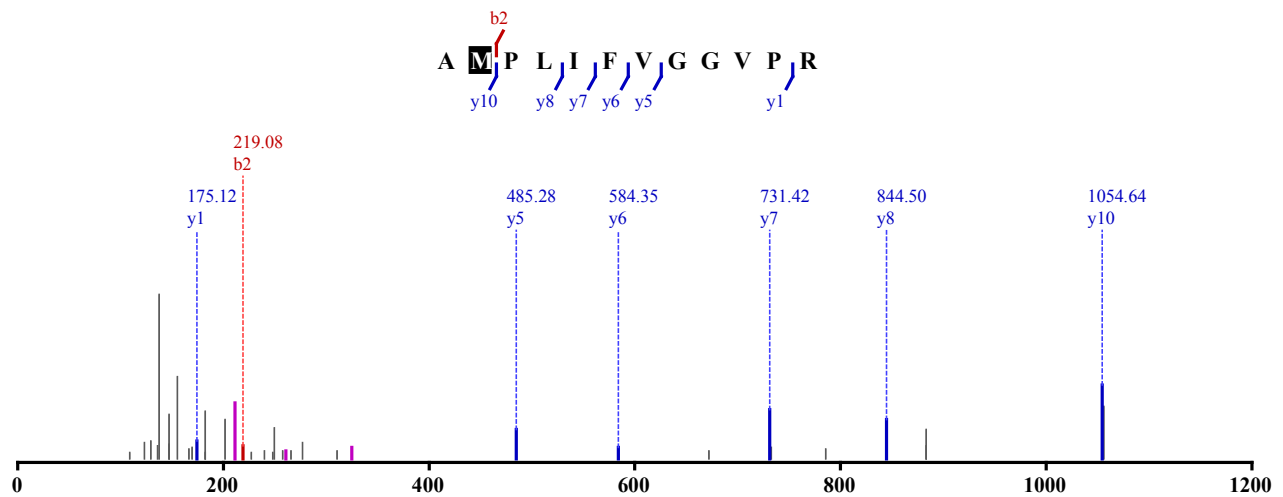

1 x Oxidation (M)

Identified in MSS484 with qvalue 0.00  
 Charge: 2, Exp. m/z: 636.859, Calc. m/z: 636.862  
 Data File: HeLa\_Try\_pH11\_HCD\_3, Scans: 50130 - 50130

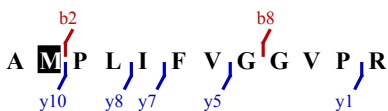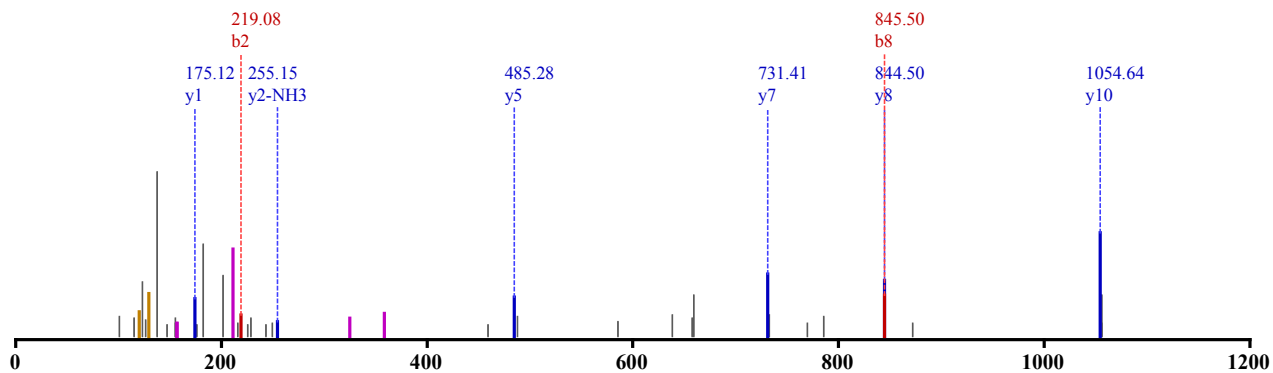

1 x Oxidation (M)  
 Identified in MSS481 with qvalue 0.00  
 Charge: 2, Exp. m/z: 563.802, Calc. m/z: 563.802  
 Data File: HeLa\_LysC\_pH5\_CID\_3xload\_3, Scans: 35510 - 35510

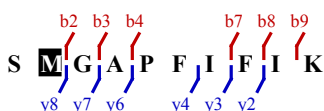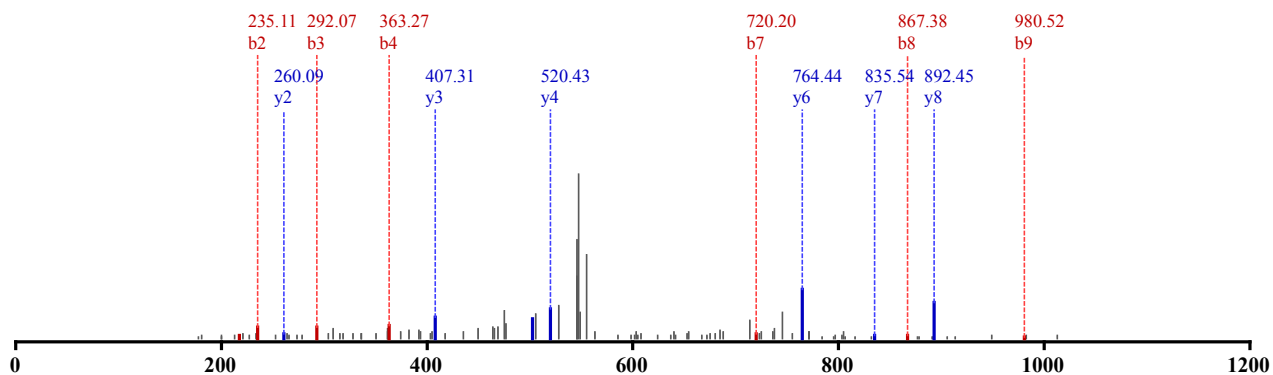

1 x Oxidation (M)  
 Identified in MSS481 with qvalue 0.00  
 Charge: 2, Exp. m/z: 563.802, Calc. m/z: 563.802  
 Data File: HeLa\_LysC\_pH11\_CID\_3xload\_2, Scans: 45199 - 45199

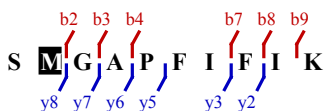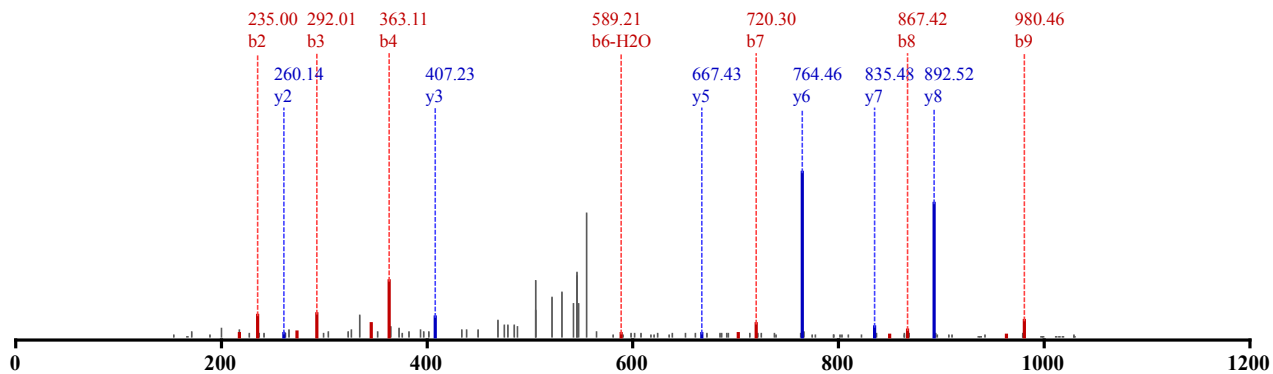

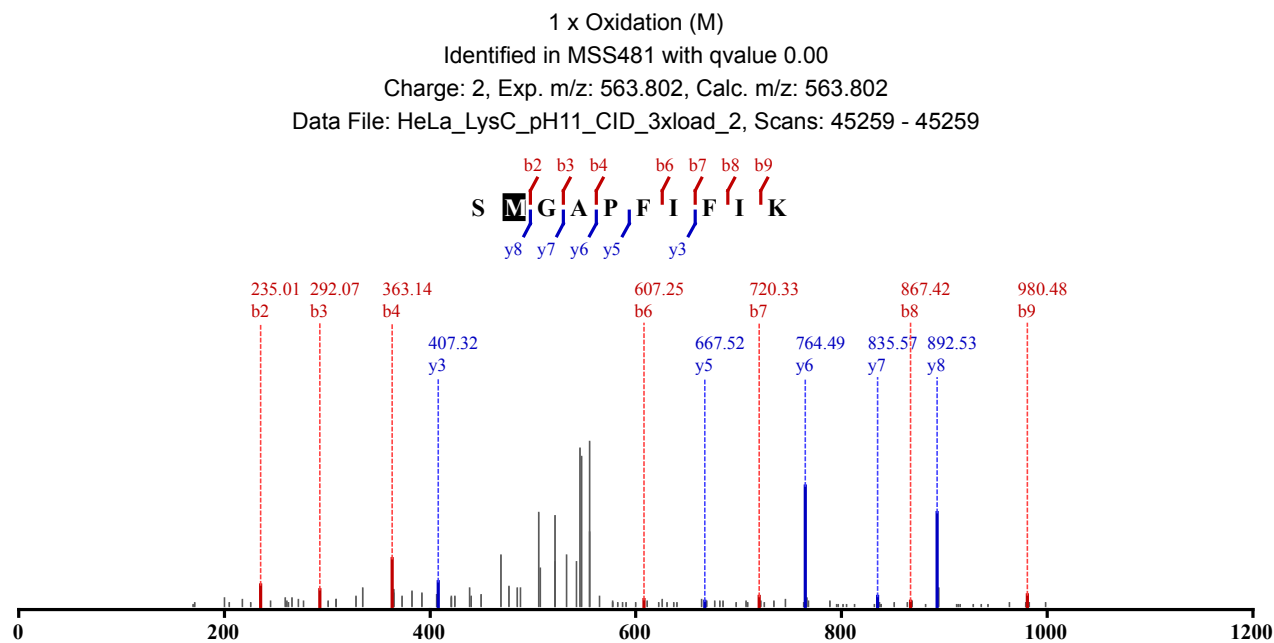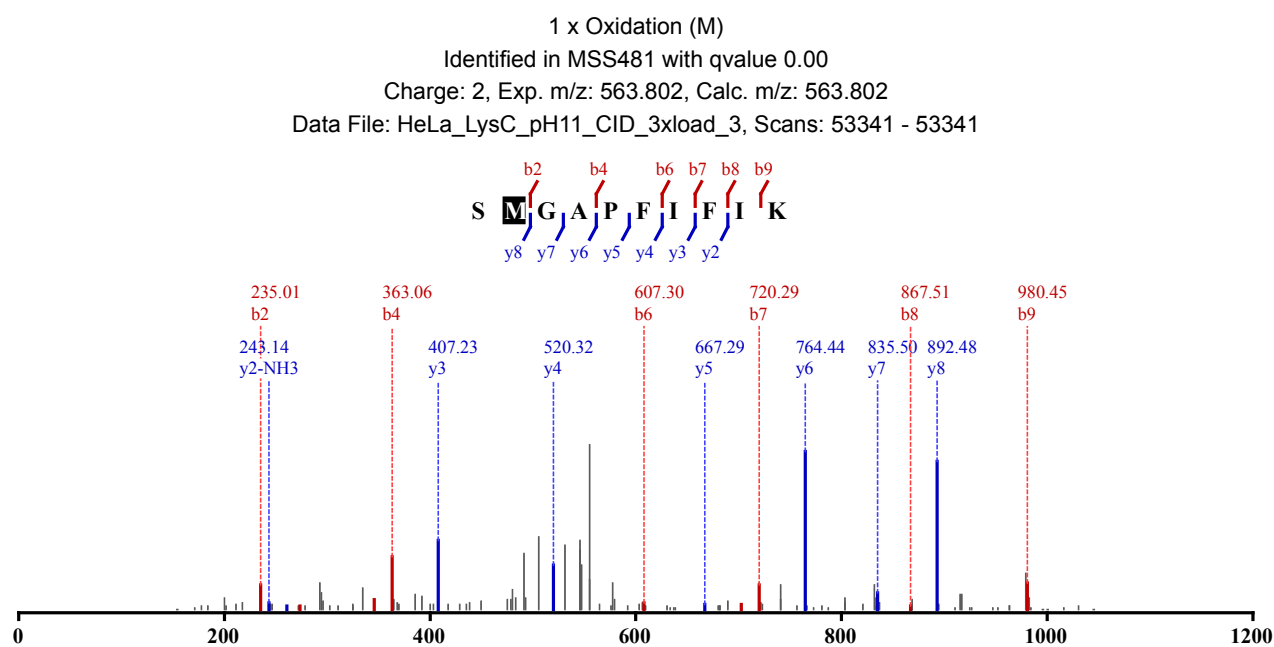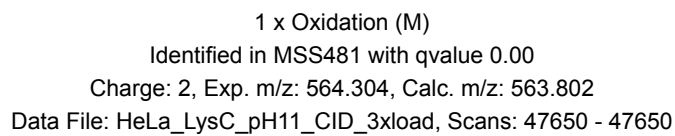

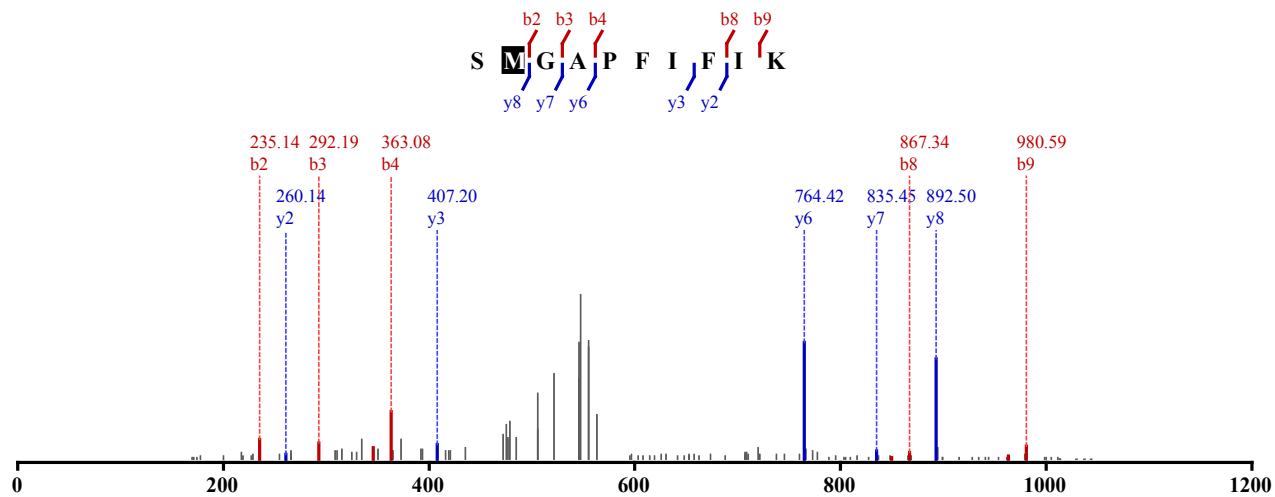

1 x Oxidation (M)

Identified in MSS481 with qvalue 0.00

Charge: 2, Exp. m/z: 563.802, Calc. m/z: 563.802

Data File: HeLa\_LysC\_pH11\_CID\_3xload, Scans: 47660 - 47660

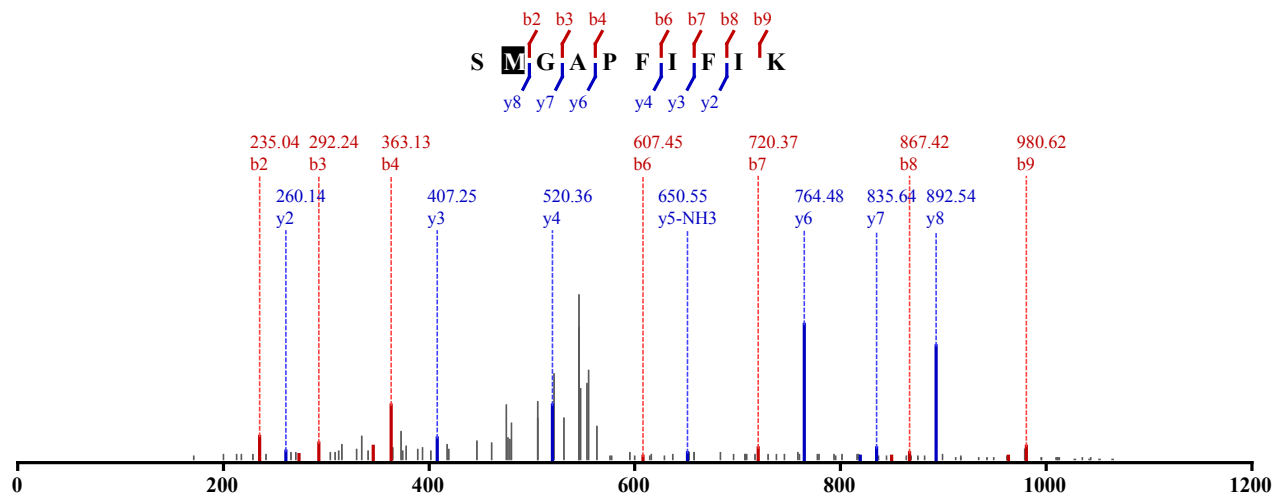

1 x Oxidation (M)

Identified in MSS481 with qvalue 0.00

Charge: 2, Exp. m/z: 563.802, Calc. m/z: 563.802

Data File: HeLa\_LysC\_pH11\_CID\_3xload, Scans: 47730 - 47730

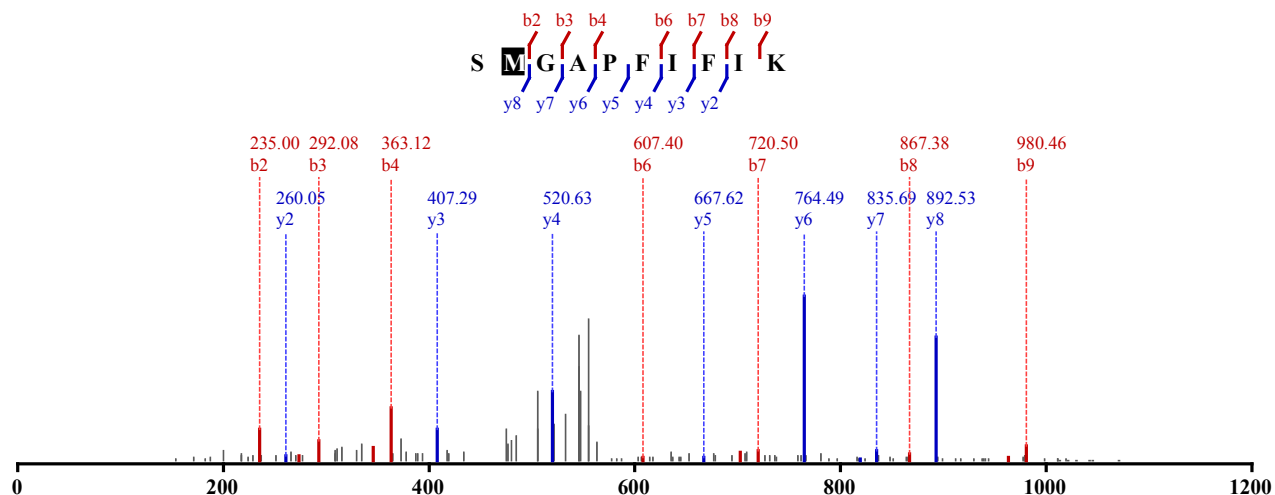

1 x Oxidation (M)

Identified in MSS481 with qvalue 0.00

Charge: 2, Exp. m/z: 563.802, Calc. m/z: 563.802



Data File: HeLa\_LysC\_pH11\_CID\_3xload, Scans: 47807 - 47807

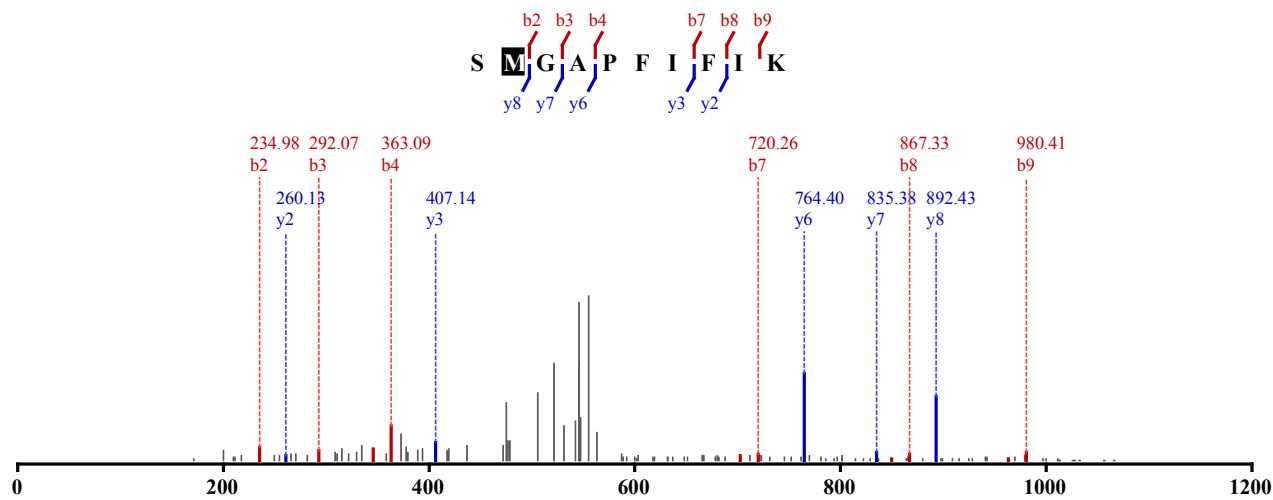

1 x Oxidation (M)

Identified in MSS481 with qvalue 0.00

Charge: 2, Exp. m/z: 564.303, Calc. m/z: 563.802

Data File: HeLa\_LysC\_pH11\_CID\_3xload, Scans: 47813 - 47813

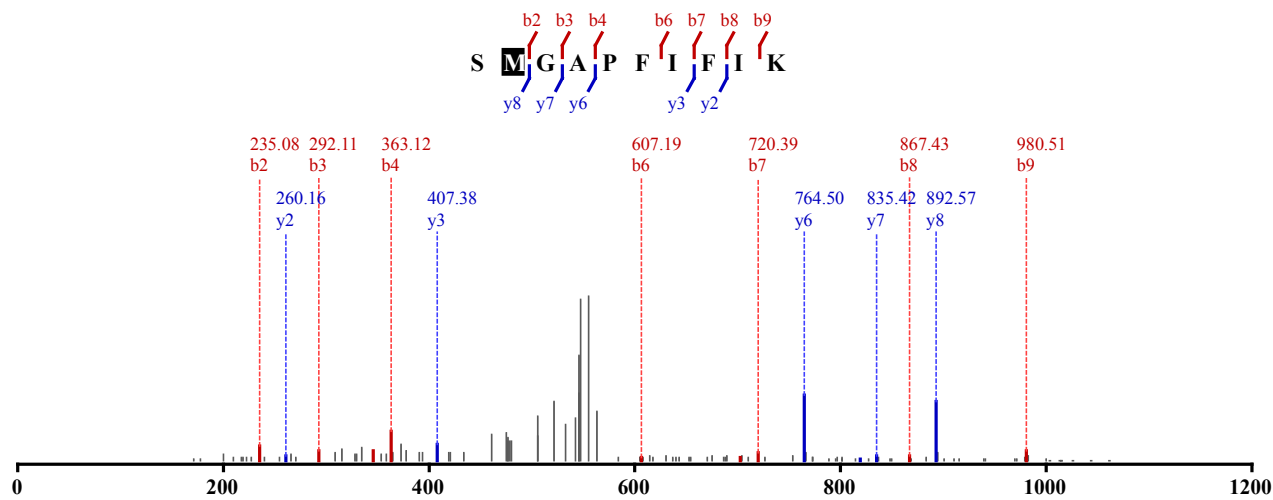

1 x Oxidation (M)

Identified in MSS481 with qvalue 0.00

Charge: 2, Exp. m/z: 563.802, Calc. m/z: 563.802

Data File: HeLa\_LysC\_pH8\_CID\_3xload\_2, Scans: 39991 - 39991

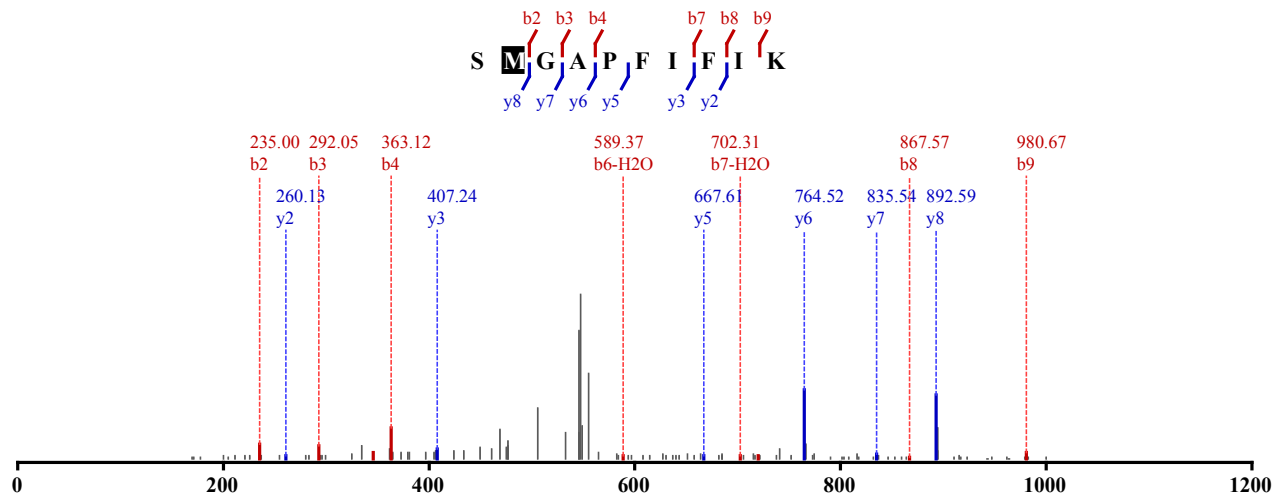

1 x Oxidation (M)

Identified in MSS481 with qvalue 0.00  
 Charge: 2, Exp. m/z: 563.803, Calc. m/z: 563.802  
 Data File: HeLa\_LysC\_pH8\_CID\_3xload\_2, Scans: 40127 - 40127

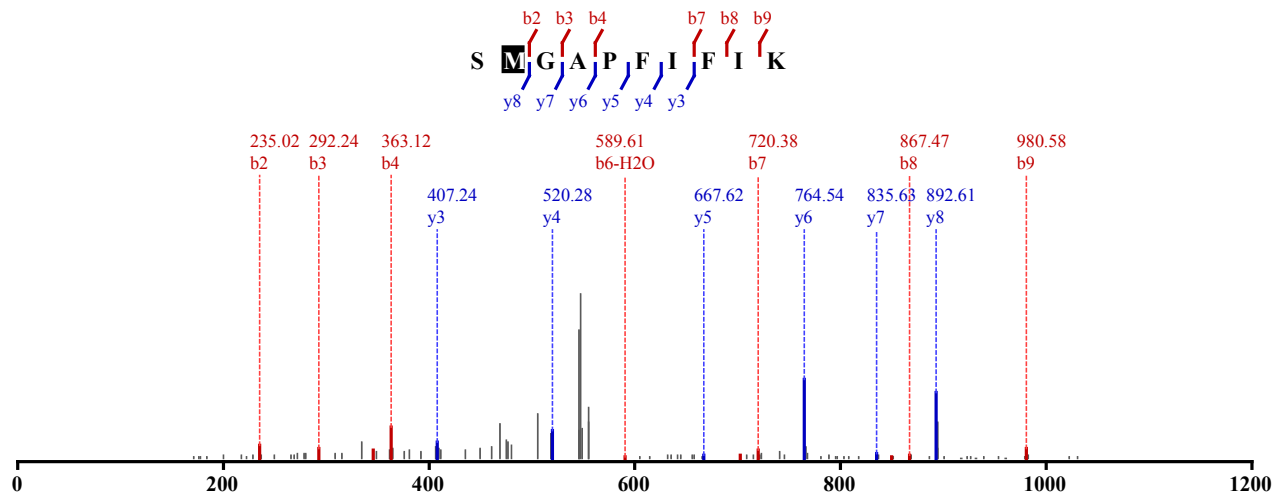

1 x Oxidation (M)  
 Identified in MSS481 with qvalue 0.00  
 Charge: 2, Exp. m/z: 563.802, Calc. m/z: 563.802  
 Data File: HeLa\_LysC\_pH8\_CID\_3xload\_3, Scans: 44508 - 44508

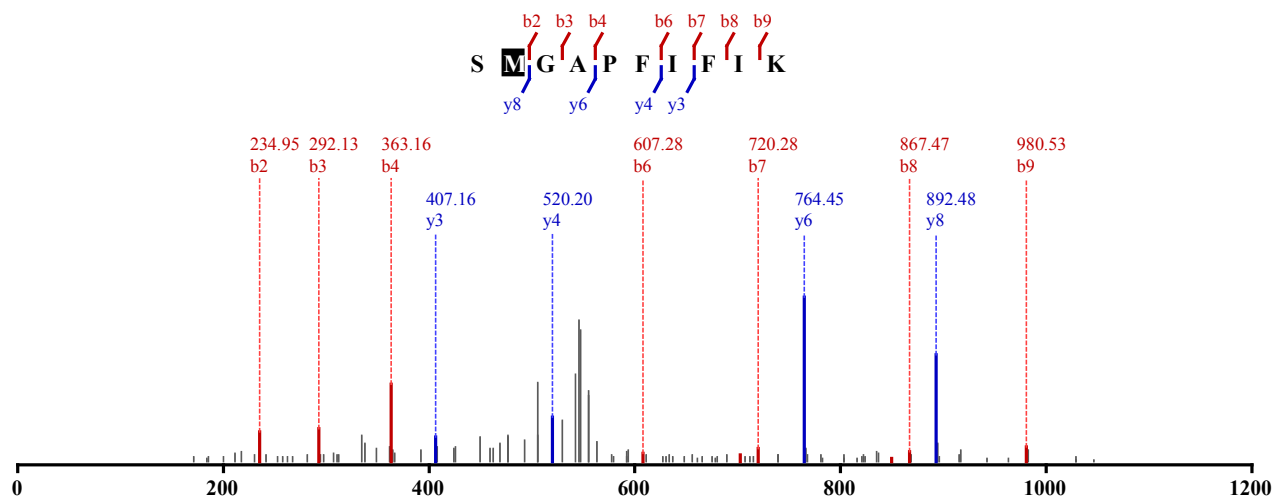

1 x Oxidation (M)  
 Identified in MSS481 with qvalue 0.00  
 Charge: 2, Exp. m/z: 563.802, Calc. m/z: 563.802  
 Data File: HeLa\_LysC\_pH8\_CID\_3xload, Scans: 42885 - 42885

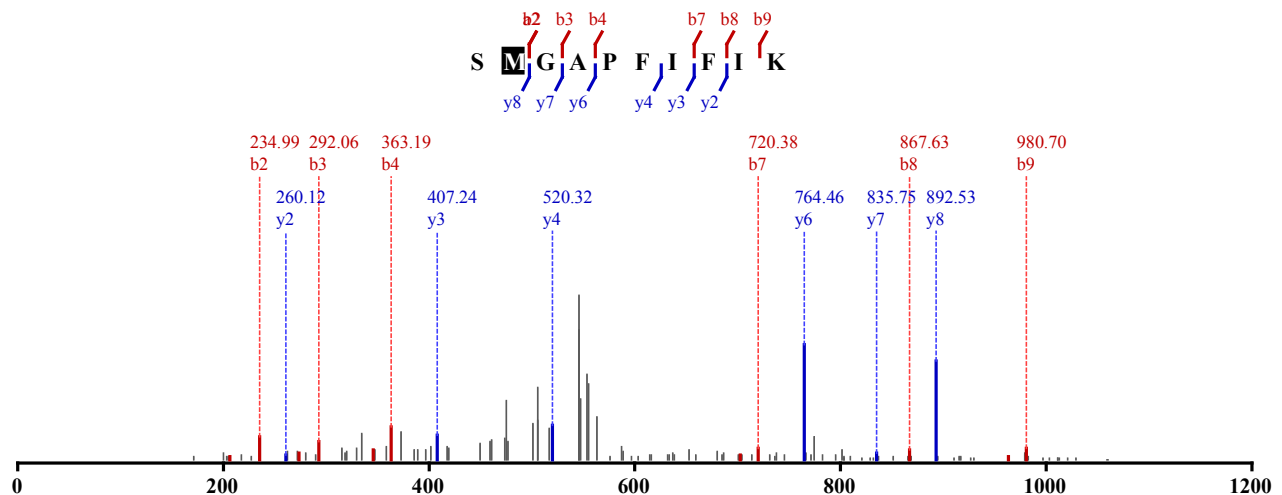

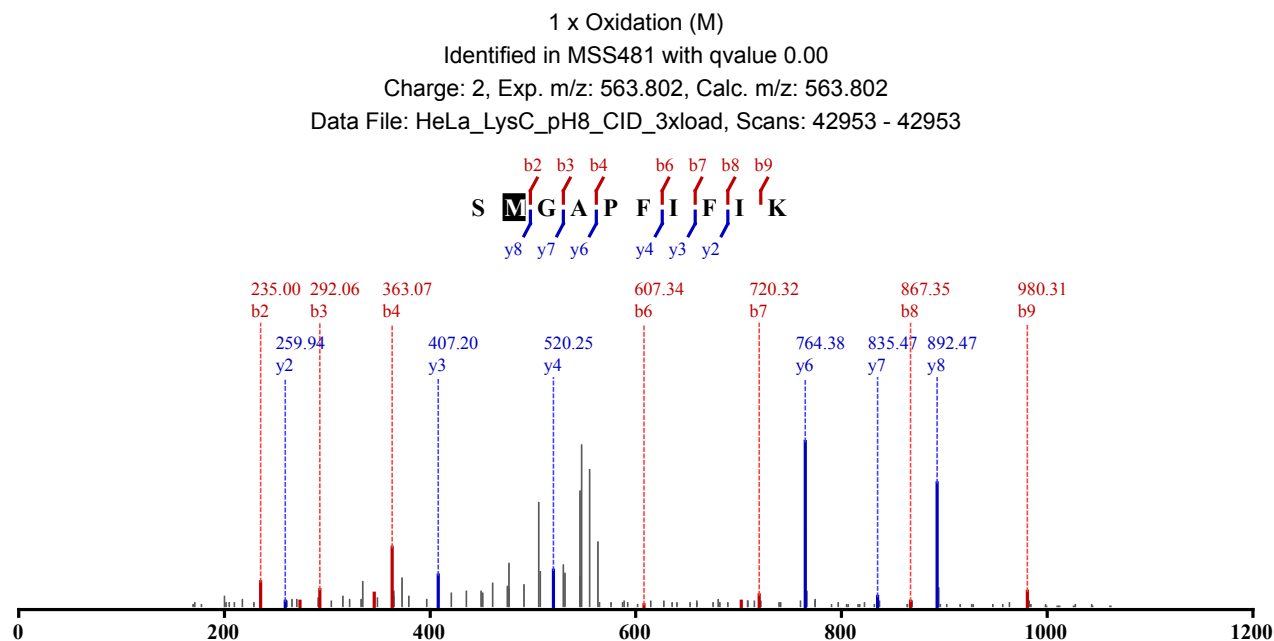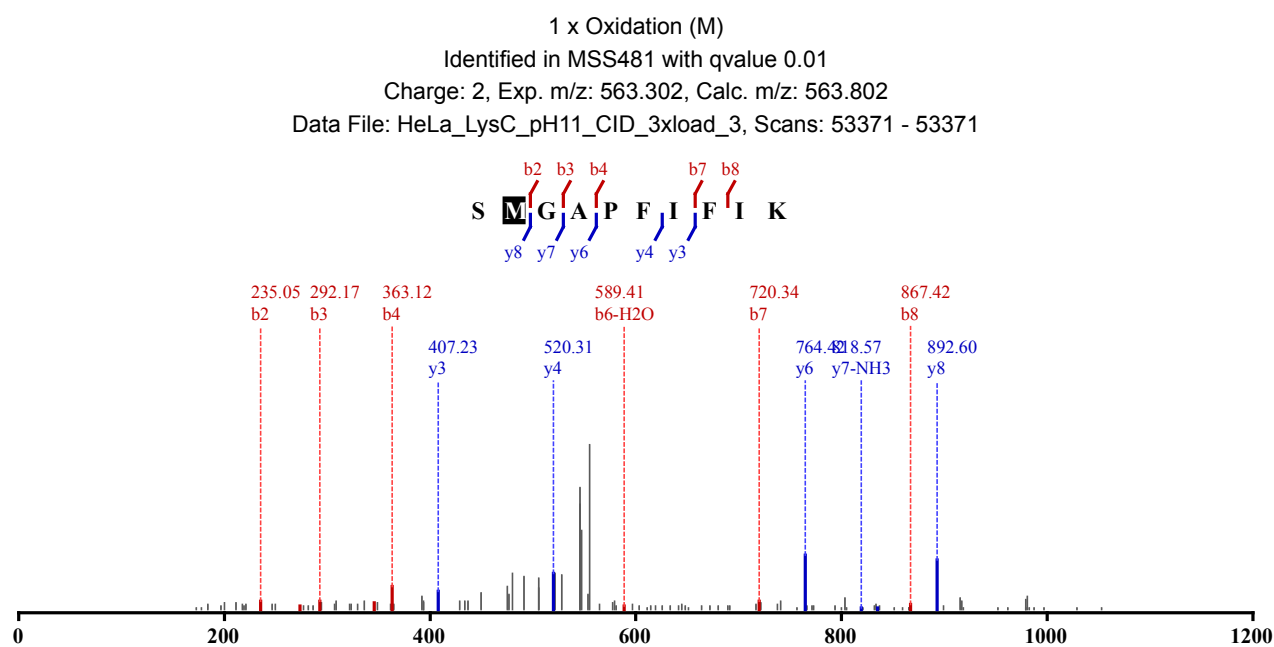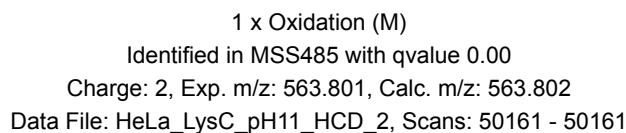

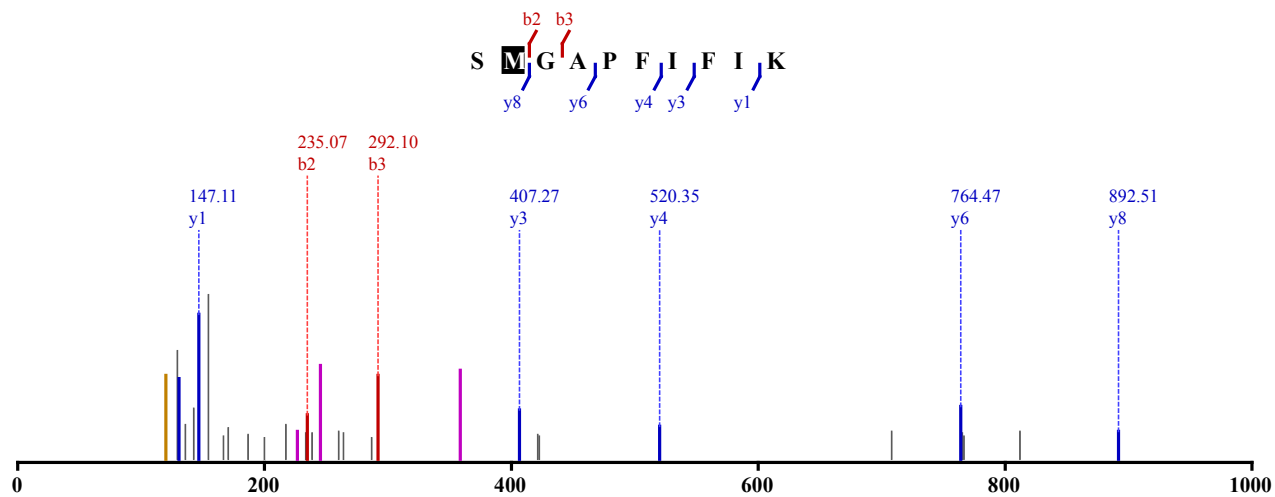

1 x Oxidation (M)

Identified in MSS485 with qvalue 0.00

Charge: 2, Exp. m/z: 563.803, Calc. m/z: 563.802

Data File: HeLa\_LysC\_pH11\_HCD\_2, Scans: 50086 - 50086

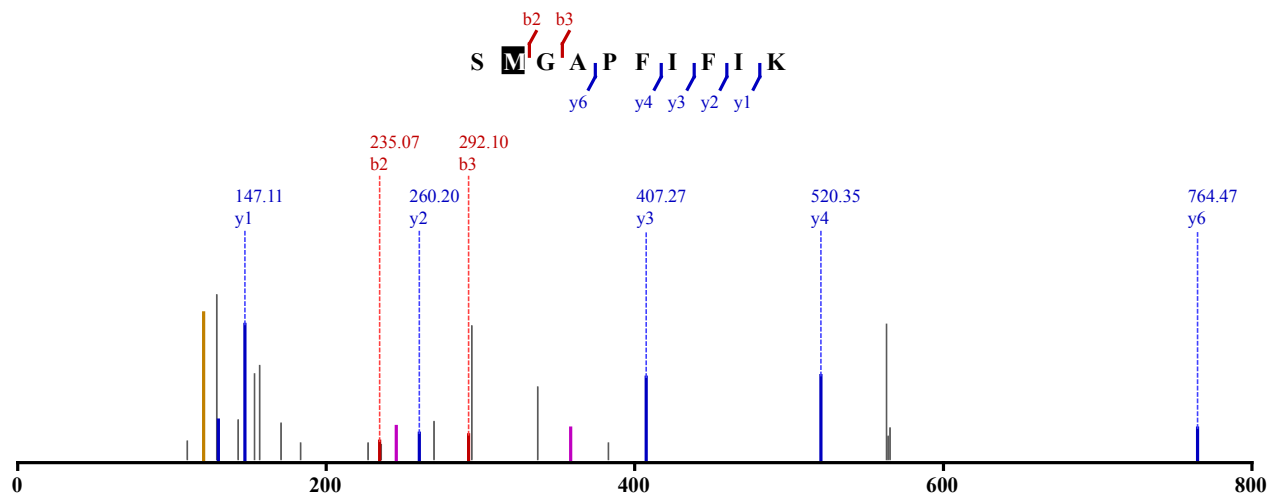

1 x Oxidation (M)

Identified in MSS485 with qvalue 0.01

Charge: 2, Exp. m/z: 563.801, Calc. m/z: 563.802

Data File: HeLa\_LysC\_pH11\_HCD\_3, Scans: 49095 - 49095

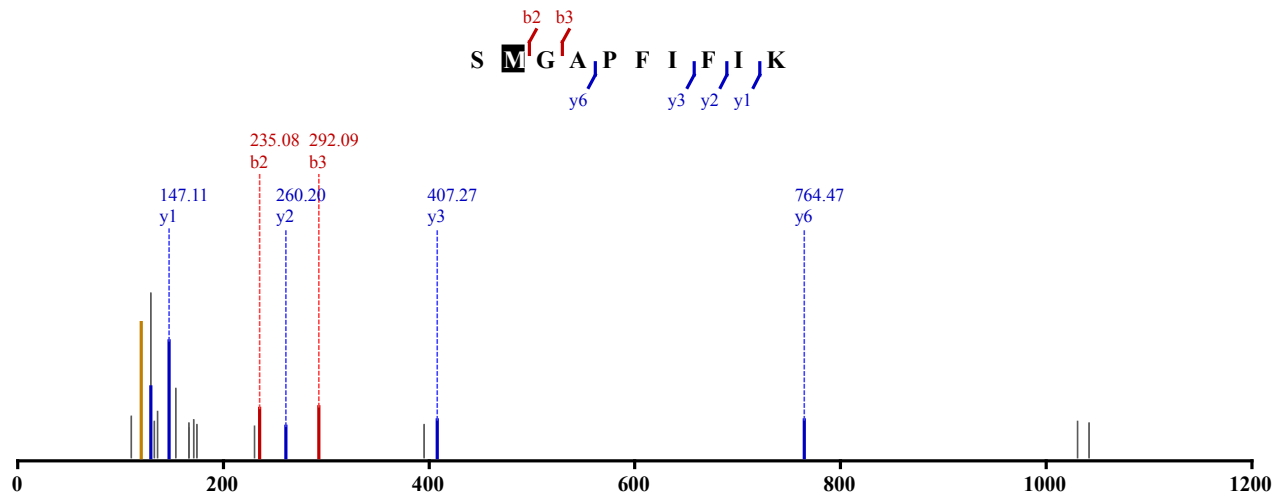

1 x Oxidation (M)

Identified in MSS485 with qvalue 0.00

Charge: 2, Exp. m/z: 563.802, Calc. m/z: 563.802

Data File: HeLa\_LysC\_pH6\_HCD\_2, Scans: 45663 - 45663

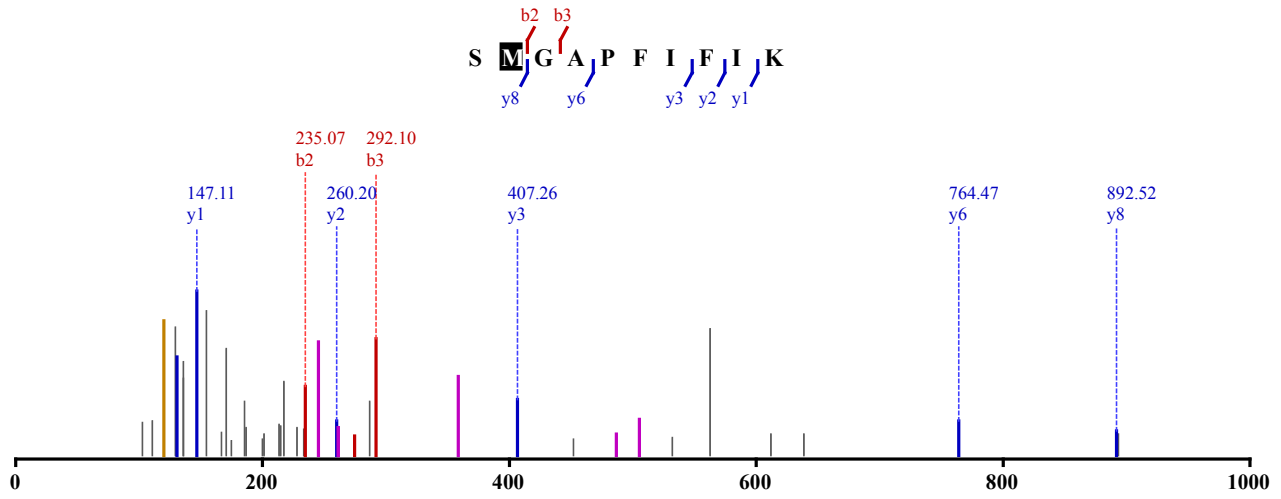

1 x Oxidation (M)

Identified in MSS485 with qvalue 0.00

Charge: 2, Exp. m/z: 563.802, Calc. m/z: 563.802

Data File: HeLa\_LysC\_pH8\_HCD\_3, Scans: 46862 - 46862

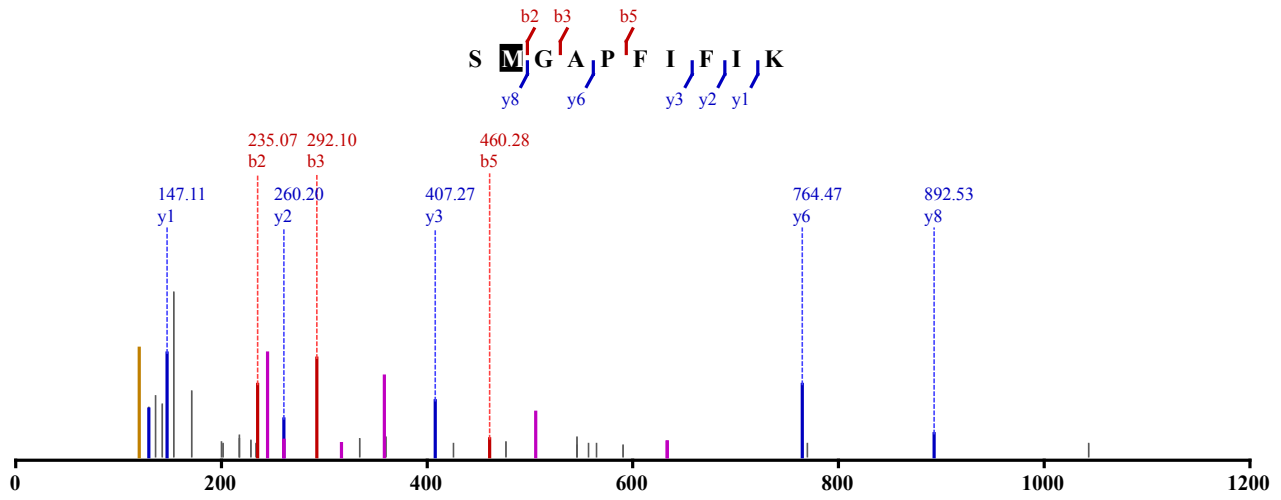

1 x Oxidation (M)

Identified in MSS480 with qvalue 0.00

Charge: 3, Exp. m/z: 579.585, Calc. m/z: 579.251

Data File: HeLa\_try\_pH5\_CID\_3xload\_3, Scans: 9127 - 9127

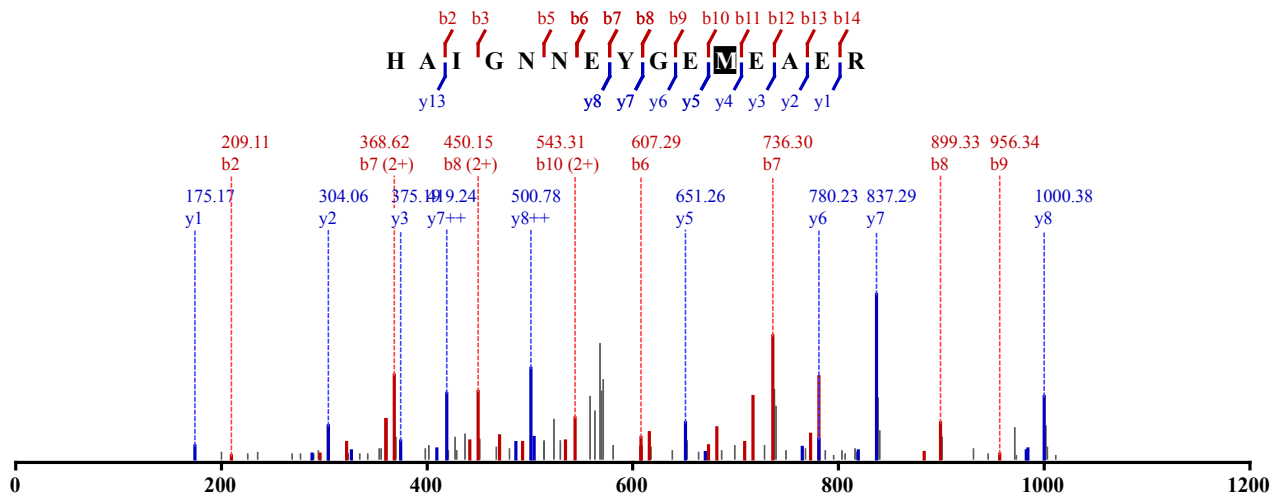

1 x Oxidation (M)

Identified in MSS480 with qvalue 0.00  
 Charge: 3, Exp. m/z: 579.251, Calc. m/z: 579.251  
 Data File: HeLa\_try\_pH5\_CID\_3xload\_3, Scans: 9133 - 9133

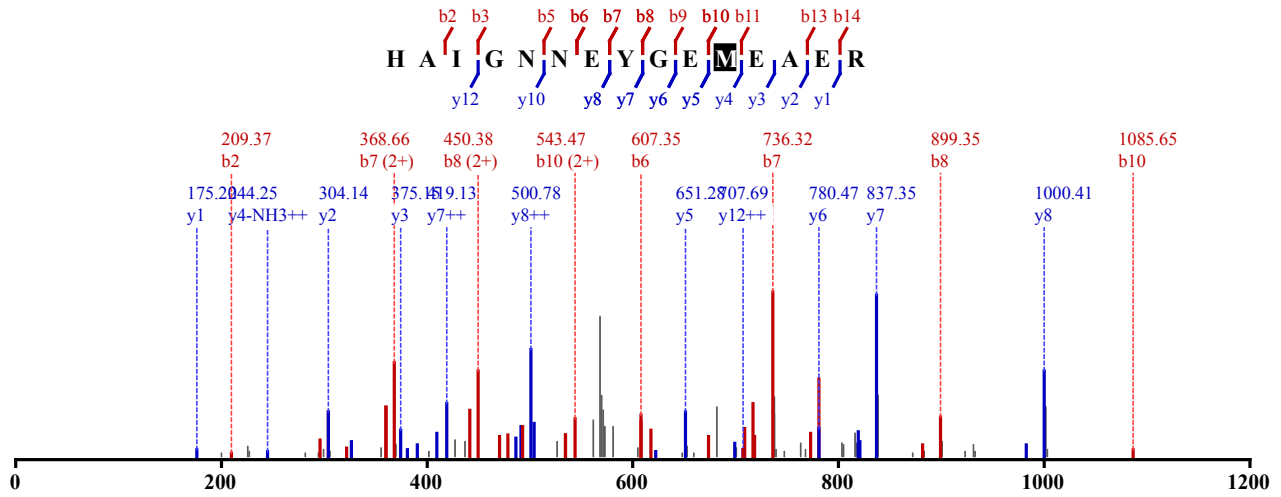

1 x Oxidation (M)  
 Identified in MSS480 with qvalue 0.00  
 Charge: 3, Exp. m/z: 579.254, Calc. m/z: 579.251  
 Data File: HeLa\_try\_pH5\_CID\_3xload\_3, Scans: 9207 - 9207

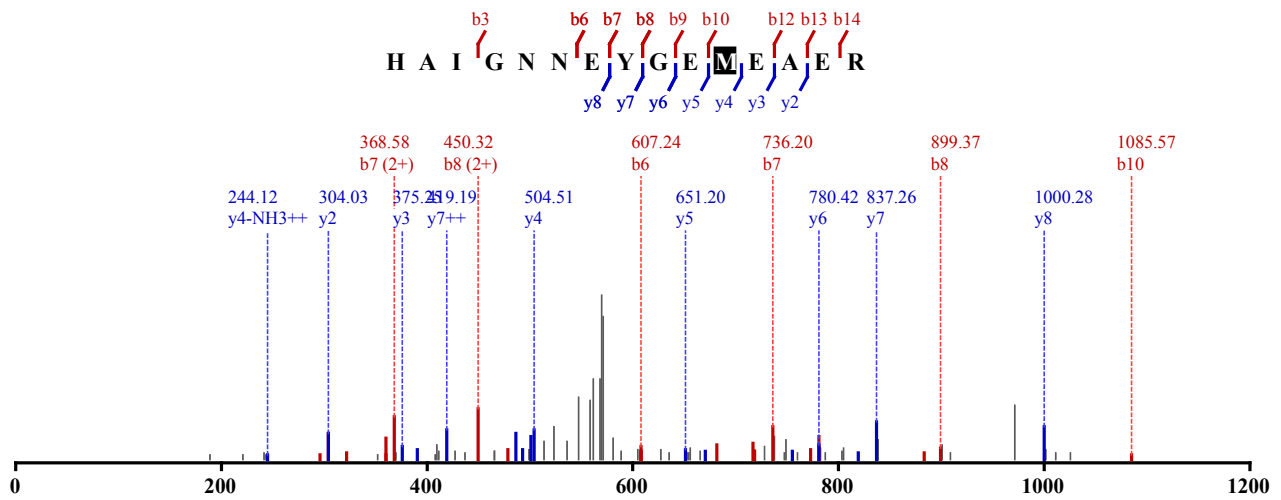

1 x Oxidation (M)  
 Identified in MSS484 with qvalue 0.00  
 Charge: 3, Exp. m/z: 579.250, Calc. m/z: 579.251  
 Data File: HeLa\_Try\_pH4\_HCD\_2, Scans: 13445 - 13445

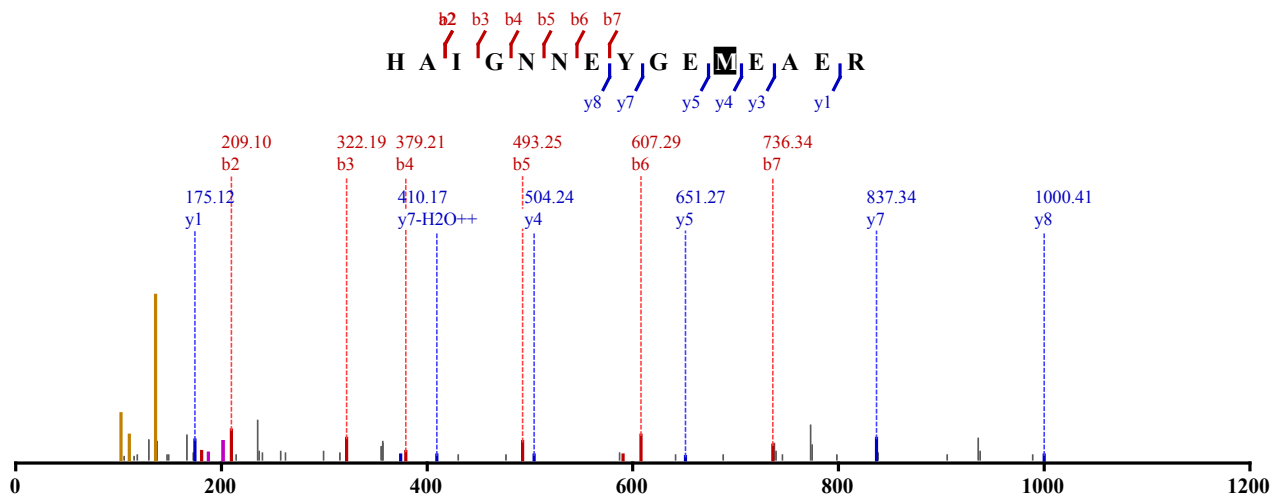

1 x Oxidation (M)  
 Identified in MSS484 with qvalue 0.00  
 Charge: 3, Exp. m/z: 579.251, Calc. m/z: 579.251  
 Data File: HeLa\_Try\_pH5\_HCD\_2, Scans: 13648 - 13648

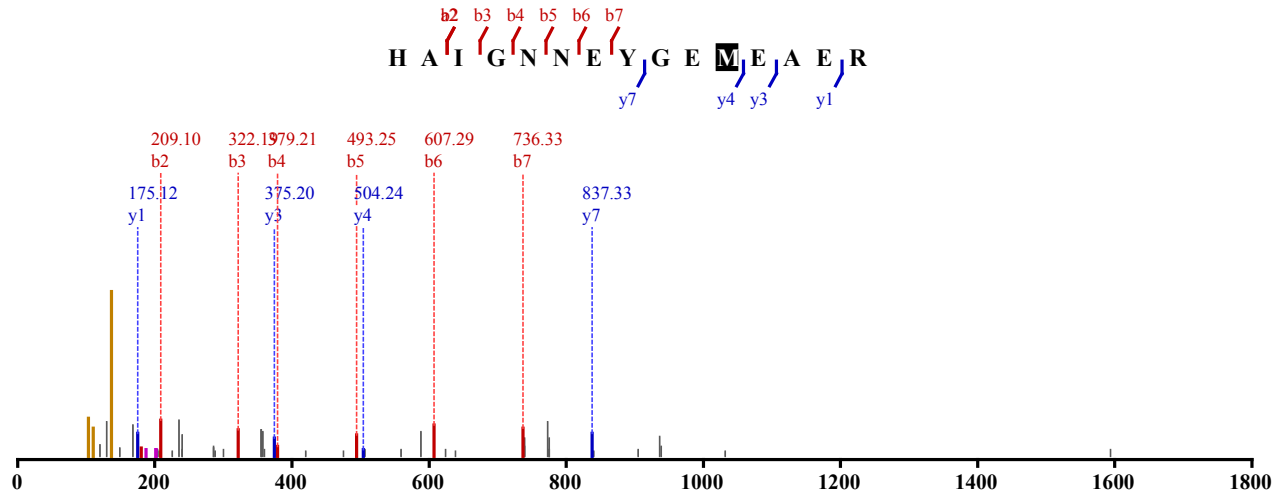

1 x Oxidation (M)  
 Identified in MSS488 with qvalue 0.00  
 Charge: 3, Exp. m/z: 579.250, Calc. m/z: 579.251  
 Data File: HeLa\_chy-try\_pH4\_CID\_3xload\_2, Scans: 7689 - 7689

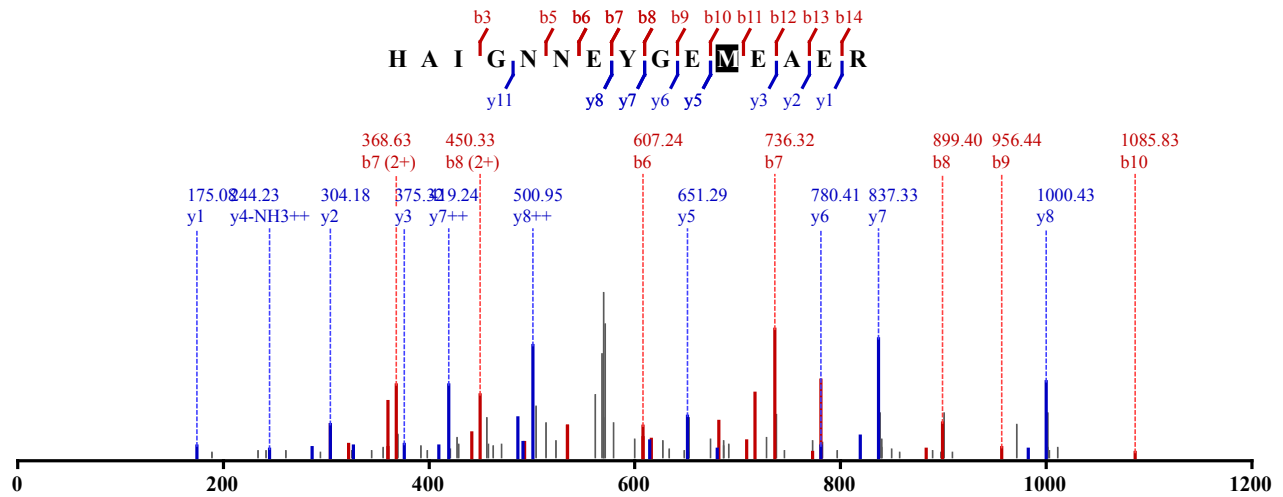

Not Modified  
 Identified in MSS479 with qvalue 0.00  
 Charge: 2, Exp. m/z: 798.842, Calc. m/z: 798.842  
 Data File: HeLa\_AspN\_pH5\_HCD\_2, Scans: 14560 - 14560

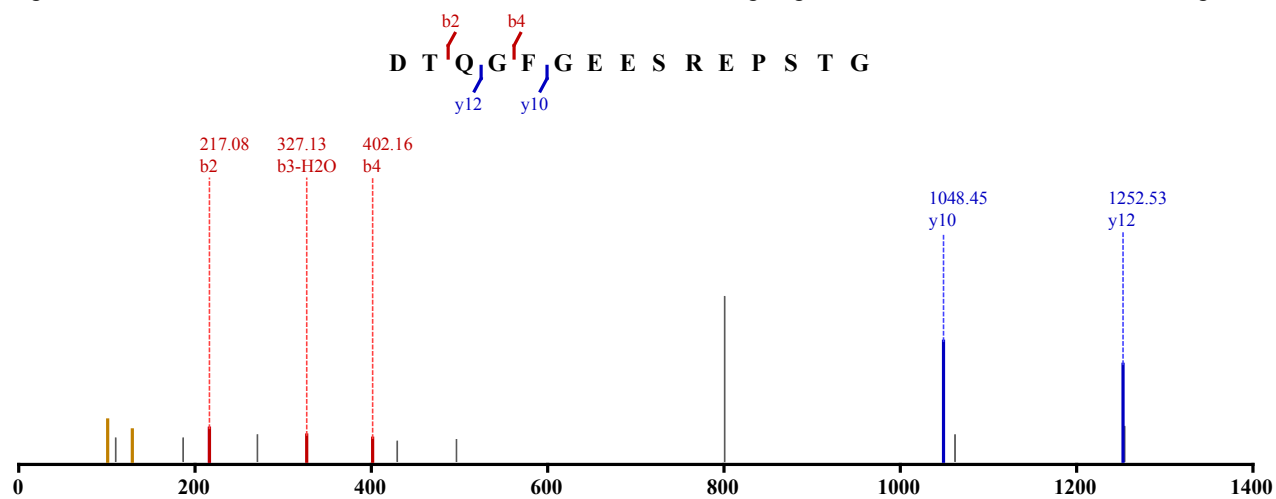

Not Modified

Identified in MSS479 with qvalue 0.00

Charge: 2, Exp. m/z: 798.841, Calc. m/z: 798.842

Data File: HeLa\_AspN\_pH6\_HCD\_1, Scans: 16914 - 16914

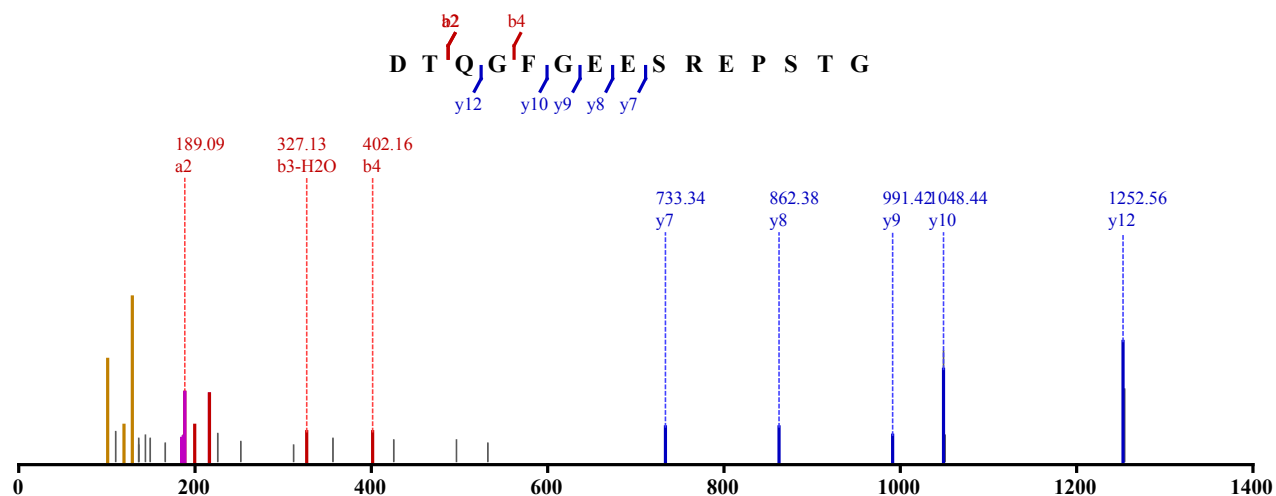

Not Modified

Identified in MSS483 with qvalue 0.00

Charge: 2, Exp. m/z: 798.842, Calc. m/z: 798.842

Data File: HeLa\_AspN\_pH6\_CID\_3xload\_2, Scans: 10190 - 10190

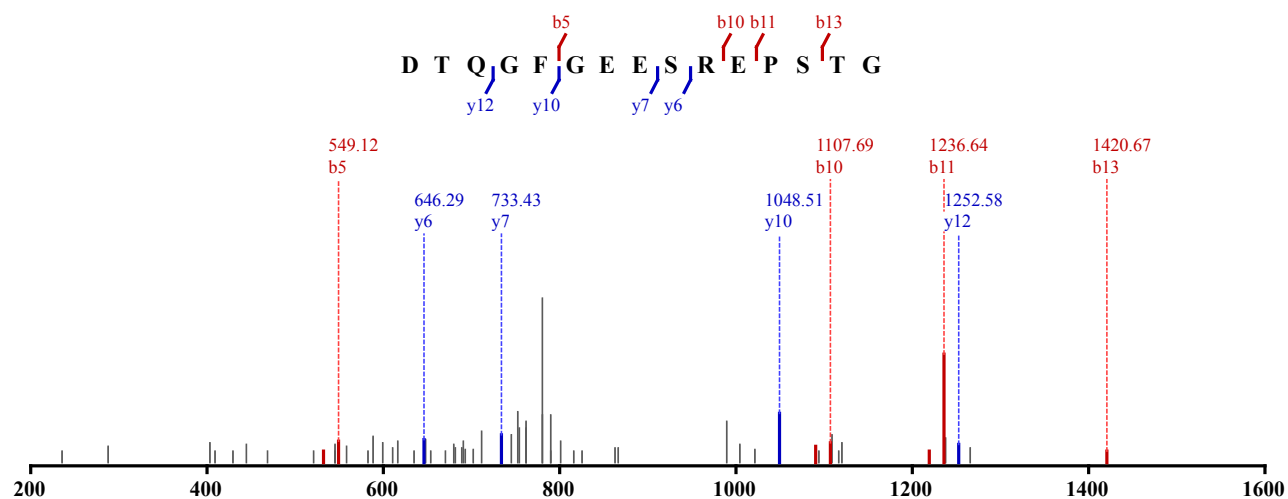

Not Modified

Identified in MSS483 with qvalue 0.00

Charge: 2, Exp. m/z: 798.843, Calc. m/z: 798.842



Data File: HeLa\_AspN\_pH4\_CID\_3xload\_2, Scans: 8779 - 8779

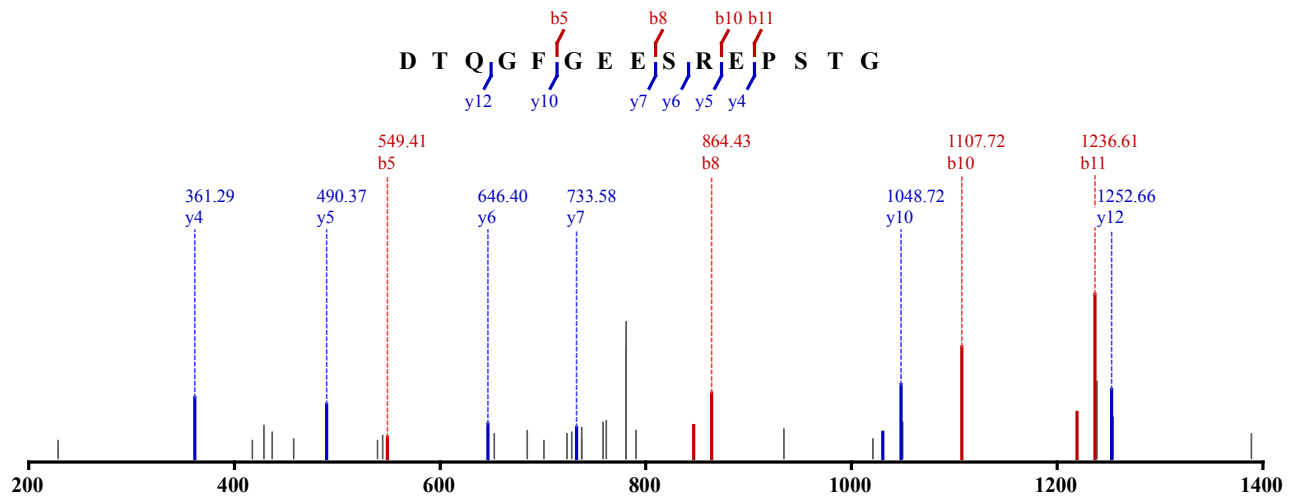

Not Modified

Identified in MSS483 with qvalue 0.00

Charge: 2, Exp. m/z: 798.843, Calc. m/z: 798.842

Data File: HeLa\_AspN\_pH4\_CID\_3xload, Scans: 8961 - 8961

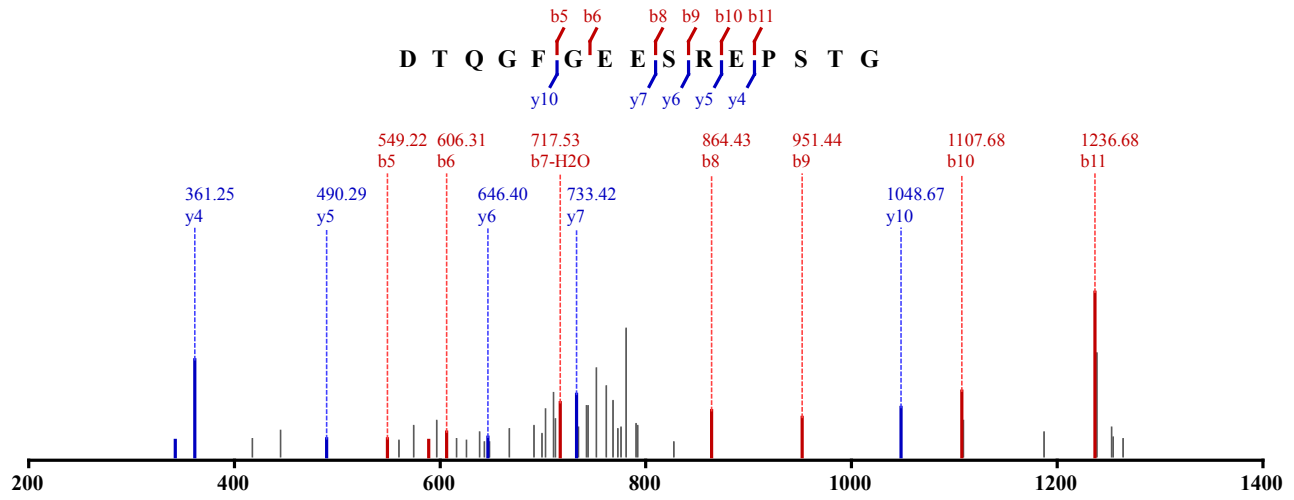

Not Modified

Identified in MSS483 with qvalue 0.00

Charge: 2, Exp. m/z: 798.843, Calc. m/z: 798.842

Data File: HeLa\_AspN\_pH5\_CID\_3xload\_2, Scans: 8711 - 8711

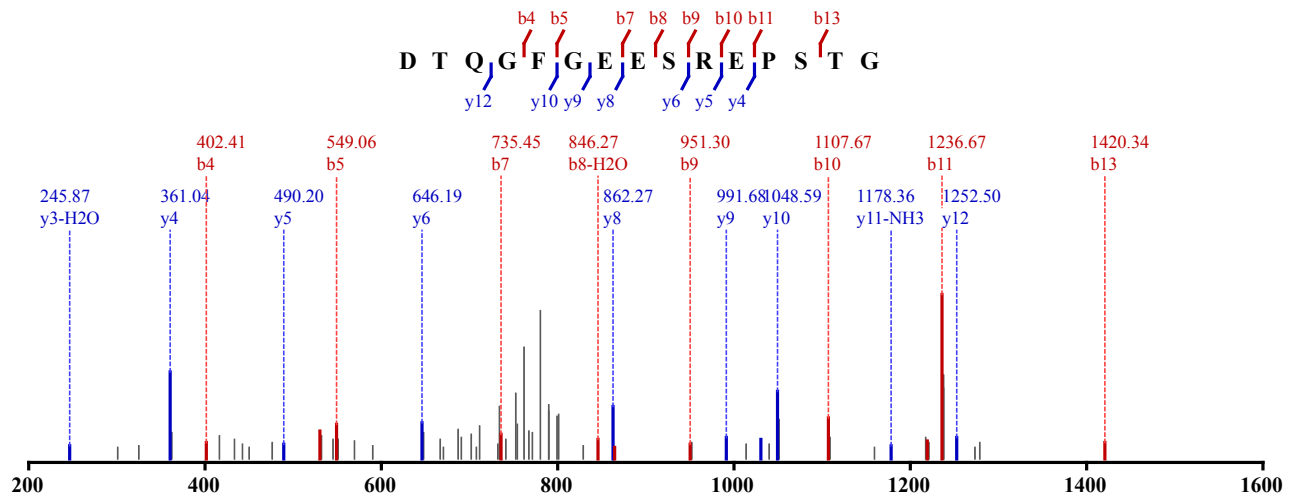

Not Modified

Identified in MSS483 with qvalue 0.00  
 Charge: 2, Exp. m/z: 798.842, Calc. m/z: 798.842  
 Data File: HeLa\_AspN\_pH5\_CID\_3xload, Scans: 8756 - 8756

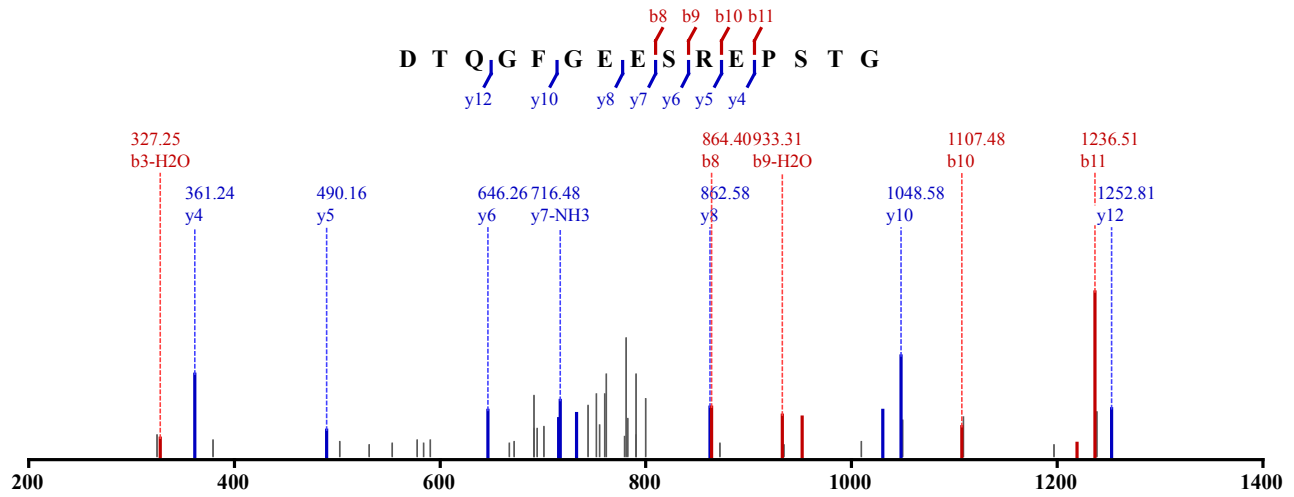

Not Modified  
 Identified in MSS483 with qvalue 0.00  
 Charge: 2, Exp. m/z: 798.843, Calc. m/z: 798.842  
 Data File: HeLa\_AspN\_pH6\_CID\_3xload\_2, Scans: 10120 - 10120

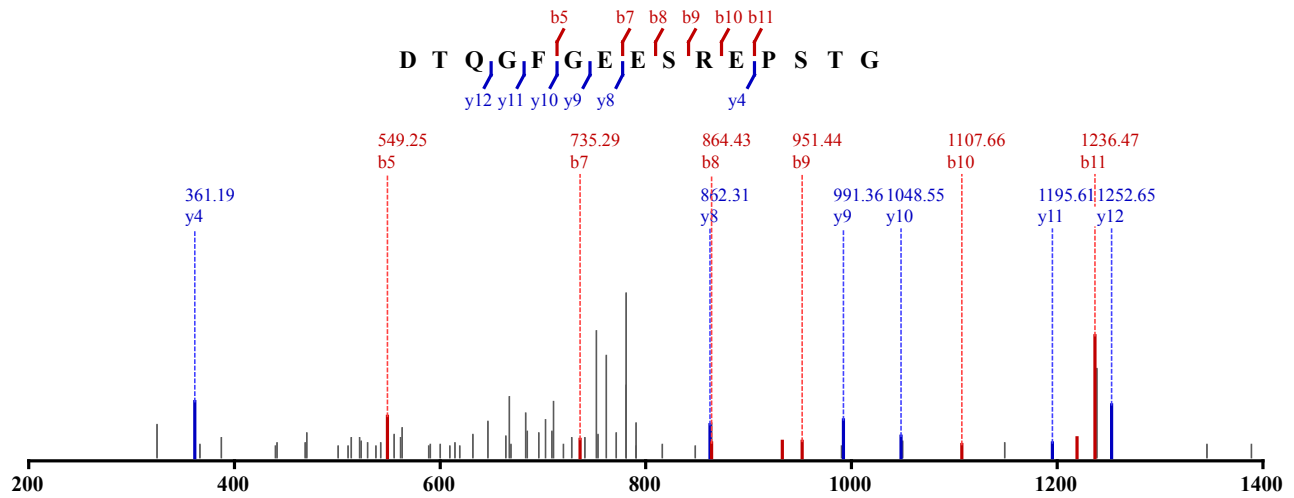

Not Modified  
 Identified in MSS483 with qvalue 0.00  
 Charge: 2, Exp. m/z: 799.344, Calc. m/z: 798.842  
 Data File: HeLa\_AspN\_pH6\_CID\_3xload, Scans: 10040 - 10040

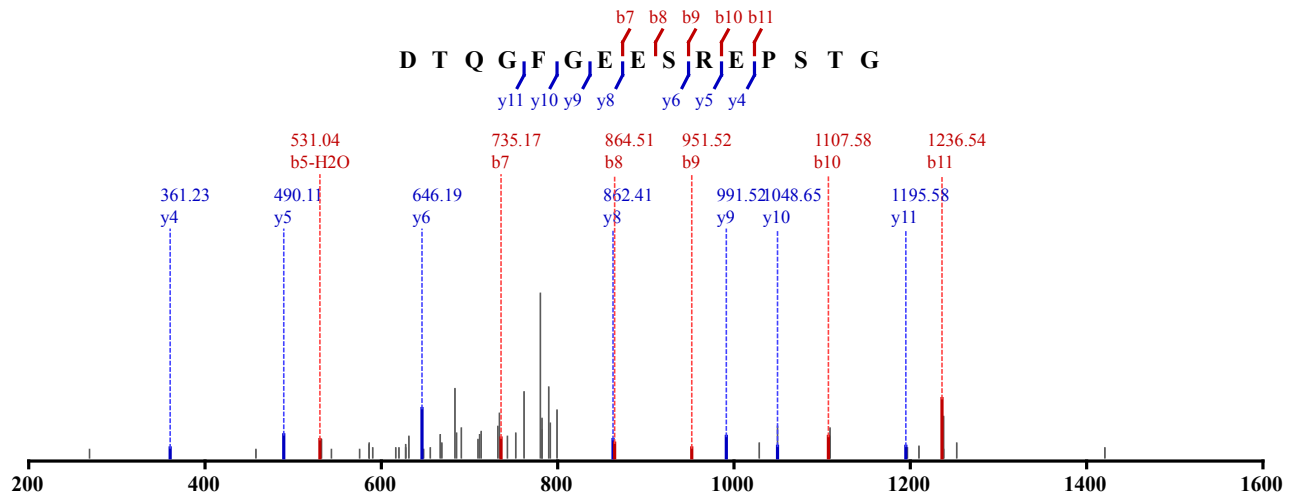

Not Modified

Identified in MSS483 with qvalue 0.00

Charge: 2, Exp. m/z: 798.842, Calc. m/z: 798.842

Data File: HeLa\_AspN\_pH6\_CID\_3xload, Scans: 10050 - 10050

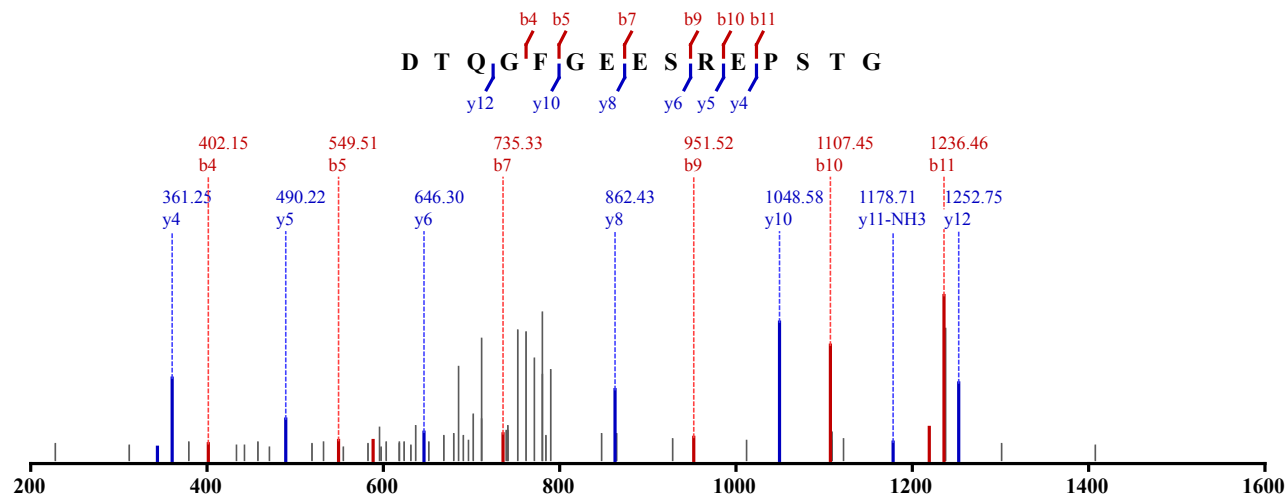

Copyright © 2013, 2014 UT Southwestern Medical Center, Dallas TX.

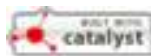
<http://www.catalystframework.org>
